# Supplementary material for: Proposal for an objective binary benchmarking framework that validates each other for comparing MCDM methods through data analytics
Source: PeerJ Comput Sci. 2023 Apr 25;9:e1350. doi: 10.7717/peerj-cs.1350 (PMC10159627; doi:10.7717/peerj-cs.1350)
Supplement: Supplemental Information 1 [file peerj-cs-09-1350-s001.xlsx]

## Sheet: Criteria
2021/06						2021/03					2020/12					2020/09					2020/06					2020/03					2019/12					2019/09					2019/06					2019/03
Genel Analizler	ALTMAN Z SKOR	ROE	MV/BV	MVA mrg		ALTMAN Z SKOR	ROE	MV/BV	MVA mrg		ALTMAN Z SKOR	ROE	MV/BV	MVA mrg		ALTMAN Z SKOR	ROE	MV/BV	MVA mrg		ALTMAN Z SKOR	ROE	MV/BV	MVA mrg		ALTMAN Z SKOR	ROE	MV/BV	MVA mrg		ALTMAN Z SKOR	ROE	MV/BV	MVA mrg		ALTMAN Z SKOR	ROE	MV/BV	MVA mrg		ALTMAN Z SKOR	ROE	MV/BV	MVA mrg		ALTMAN Z SKOR	ROE	MV/BV	MVA mrg
ACSEL	-2.7	3.61	-0.95	-7.18		-1.06	-15.22	0.42	7.87		-6.73	7.89	-1.42	-2.78		11.49	3.93	2.7	3.03		3.8	5.19	0.94	1.35		-2.31	-19.12	-0.32	0.54		1.11	4.89	0.29	0.19		5.05	2.07	1.34	2.8		-3.37	12.57	-1.25	-3.12		-0.71	-23.22	0.15	0.64
ADEL	0.18	5.56	1.01	-2.23		-0.73	-11.24	-1.42	3.48		0.42	-4.43	2.45	0.79		0.3	0.03	0.97	0.05		0.31	5.77	0.72	0.42		-1.22	8.94	-0.85	-0.2		0.85	-11.56	0.72	0.19		0.21	2.55	0.13	0		-0.08	-1.64	0.11	-0.04		-0.69	-5.67	-0.07	0.12
AEFES	0.15	6.86	0.04	2.8		-0.57	-8.3	-0.16	-3.78		0.19	1	0.13	0.46		0.24	7.5	0.07	0.89		0.19	5.11	0	3.17		-0.66	-12.25	-0.18	-4.46		0.15	0.27	-0.03	0.19		0.32	7.41	0.11	0.8		0.21	5.11	0.11	3.88		-0.61	-5.59	-0.22	-4.83
AFYON	1.45	5.39	-0.66	-9.65		-0.31	2.97	-0.98	8.23		0.56	3.12	0.6	-0.36		1.49	2.09	0.71	-0.7		3.85	5.76	-0.25	2.91		-0.08	28.04	-0.55	2.07		0.11	-10.69	1.29	1.36		0.06	-10.31	0.5	0.69		-0.14	-7.9	-0.13	-1.72		-0.3	-8.32	0.03	0.78
AKCNS	-0.18	5.51	-0.95	-2.87		-0.68	-7.44	0.51	3.11		0.42	3.04	0.33	0.01		0.46	5.71	-0.15	-0.5		0.94	3.54	1.01	1.06		-1.47	-9.97	-0.41	-0.08		0.8	1.93	0.56	0.21		0.42	2.73	0.05	0.01		0.3	0.62	-0.05	-0.24		-1.22	-14.43	0.02	0.27
AKSA	0.45	14.19	0.89	0.19		-0.78	-16.97	-0.07	0.8		1	12.12	1.08	0.64		0.34	8.15	-0.2	-0.15		0.18	-0.61	0.42	0.12		-0.98	-14.17	-0.42	-0.33		0.34	3.06	0.42	0.21		0.35	5.12	-0.01	0.06		0.27	5.65	0.11	0.37		-0.67	-11.24	0.18	-0.32
ALCAR	-1.78	1.03	-2.34	-12.05		-4.03	-8.69	1.18	13.44		5.98	3.43	5.23	2.5		1.86	6.16	1.54	0.77		0.93	2.81	0.87	1.37		-1.87	-2.89	-0.59	-0.67		0.93	1.53	0.6	0.4		1.91	1.46	1.04	1.55		-1.43	0.51	-1.12	-1.76		-1.13	-12.28	0.01	0.16
ALKA	2.6	5.24	-1.12	-4.52		-3.84	-27.37	1.52	5.45		0.36	2.99	-0.23	-0.54		0.73	10.59	0.14	-0.35		4.4	13.06	1.44	0.45		-2.36	-14.01	0.25	1.35		1.86	7.04	0.36	0.13		0.55	6.51	0.03	-0.05		1.24	8.5	-0.32	-0.66		-3.38	-26	0.29	0.73
ALKIM	2.21	6	-1.03	-6.39		-2.9	-31.98	1.08	8.04		1.35	8.46	-0.41	-0.67		0.12	12.03	-0.47	-1.37		1.75	13.8	2.33	-0.14		-1.63	-27.07	0.49	3.53		2.53	8.94	0.55	0.25		0.48	7.58	-0.18	-0.33		1.25	11.63	0.33	-0.37		-2.38	-22.4	-0.11	0.82
ALMAD	0.94	-16.36	-1.06	-34.63		-0.27	-46.85	-0.16	31.4		-1.94	3.66	0.16	-39.52		2.39	21.37	0.52	-28.61		0.95	2.72	1.64	73.46		0.45	3	0.02	25.79		0.41	22.59	-0.84	-2.71		-0.02	-14.79	0.74	2.68		0.16	22.23	-0.88	-11.21		-1.36	169.35	0.1	12.82
ARCLK	0.15	3.04	-0.17	-0.16		-0.83	-13.11	0.1	-0.14		0.44	7.37	0.17	0.14		0.17	7.23	0.07	0.39		0.36	3.59	0.32	0.98		-0.89	-7.23	-0.53	-1.37		0.26	1.98	0.03	0.04		0.28	2.83	-0.02	0.13		0.29	2.48	0.15	0.61		-0.83	-7.88	0	-0.78
ARSAN	0.86	6.03	0.28	1.84		-1.11	-15.8	-0.33	-1.96		0.94	7.76	0.02	0.17		0.73	7.81	0.18	1		0.57	2.74	0.44	2.66		-0.52	-11.86	-0.21	-3.23		0.14	2.43	0.24	0.38		0.42	5.43	0.1	0.69		0.42	3.72	0.05	2.59		-0.34	1.28	-0.03	-3.14
ASUZU	0.06	2.5	-0.53	-1.58		-0.35	-1.07	0.1	1.44		0.43	9.26	0.21	-0.11		0.12	-0.81	0.17	-0.27		0.3	-2.84	0.95	1.64		-0.97	-7.1	-0.51	-0.98		0.59	7.28	0.31	0.05		0.29	-0.43	0.37	0.38		0.08	-0.28	0.02	0.55		-0.35	9.34	0.18	-0.63
ATEKS	-0.91	0.27	-0.83	-5.8		0.55	-7.6	0.89	6.58		1.05	9.25	0.35	0.69		0.49	-0.47	0.44	1.45		0.38	-0.93	0.26	2.12		-0.82	-2.87	-0.28	-3.23		0.33	0.78	0.2	0.39		0.78	0.6	0.54	1.64		-0.5	0.68	-0.49	0.38		-0.54	-2.83	-0.04	-2.11
AVOD	-0.68	-8.28	-3.47	-9.81		-0.33	-5.95	1.34	10.37		0.43	10.59	0.47	-0.49		0.69	-10.23	4.54	1.35		0.69	-3.65	2.55	1.48		-0.7	-27.72	-0.81	0.3		0.02	2.19	0.2	0.07		0.1	10.24	-0.08	-0.07		0.34	8.51	-0.09	-0.55		-0.59	20.36	-1.53	0.25
AYGAZ	0.62	8.86	-0.01	-0.08		-1.5	0.51	0.21	0.26		0.88	3.93	0.25	0.06		0.44	4.18	-0.13	-0.03		0.51	1.61	0.58	0.46		-2.22	-21.83	-0.35	-0.45		0.73	2.63	0.06	0.02		0.75	2.71	0.34	0.16		0.69	5.22	-0.21	-0.08		-1.86	-8.65	0	-0.05
BAGFS	0.1	4.47	-0.47	0.52		-0.25	7.94	0.29	-0.89		0.31	23.42	-0.03	0.37		-0.05	-24.07	0.38	0.13		0.18	-6.2	0.69	1.38		-0.56	-21.89	-0.48	-1.85		0.06	-1.53	0.68	0.45		0.44	12.29	0.27	0.85		0.13	7.45	0.13	1.77		0.45	29.86	0.02	-1.28
BAKAB	-0.17	2.25	-0.27	-2.16		-1.07	-11.3	0.36	2.61		0.82	4.88	0.77	0.21		0.65	1.51	0.83	0.34		0.34	5.81	0.39	0.44		-0.88	-5.09	-0.12	-0.31		0.35	0.68	0.23	0.13		0.45	1.5	0.13	0.23		0.3	2.29	0.11	0.46		-1	-17.11	-0.06	-0.63
BANVT	0.62	14.91	0.59	-1.48		-0.81	18.38	0.12	2.43		0.93	-10.09	2.92	0.67		0.28	-5.19	0.02	-0.12		0.63	-1.48	0.75	0.34		-1.93	-13.25	-0.21	-0.03		0.38	-5.76	0.03	0.01		0.62	3.13	0.05	-0.1		1.05	14.63	0.24	0.1		-1.8	-12.97	-0.1	0.05
BFREN	-5.4	11.8	-2.25	-17.13		7.82	-13.41	-14.45	16.27		0.65	6.19	10.96	-1.95		17.39	13.9	20.21	6.82		1.89	5.99	8.08	1.75		-4.6	-31.97	-4.44	4.85		2.1	7.22	2.73	0.48		3.61	0.11	1.54	-0.14		0.24	18.4	1.44	-2.98		-3.88	-32.89	-0.63	4.18
BLCYT	13.42	10.83	1.28	-4.19		10.64	-9.16	3.35	10.76		0.37	6.26	0.29	0.28		2.22	6.78	0.03	-0.55		0.18	-0.43	0.43	1.39		0.32	-35.89	0.43	0.42		2.03	16.85	0.27	0.42		1.24	8.39	0.34	0.86		0.38	9.91	-0.05	1.59		-0.76	-25.13	0.09	-2.3
BNTAS	1.98	5.14	0.23	-0.41		0	-5.7	-0.2	1.24		1	-0.71	0.08	0.15		-1.26	6.05	-0.19	-0.74		1.5	2.94	0.52	0.57		-0.41	-7.3	0.14	0.81		1.81	3.79	0.24	0.4		0.88	1.66	0.18	0.65		0.08	2.98	-0.04	0.91		0.85	-5.73	0.3	-1.1
BOSSA	0.71	14.11	-0.09	-2.2		-0.18	-5.01	1.16	3.75		0.8	23.12	0.41	0.29		0.25	-1.41	0.49	0.15		0.19	-9.69	1.22	0.95		-0.96	-27.66	-0.32	-0.59		0.4	7.99	0.67	0.36		0.44	14.72	0.05	0.4		0.21	4.74	-0.21	0.78		-0.62	-39.89	0.07	-1.11
BRISA	-0.03	10.68	-1.62	-2.01		-0.45	-18.85	1.27	2.35		0.78	12.57	1.19	0.39		0.31	15.23	-0.83	-0.27		0.36	2.08	1.66	1.2		-0.7	-5.05	-1.02	-0.76		0.23	4.4	1.12	0.49		0.25	6.51	0.16	0.51		0.1	2.06	-0.23	0.78		-0.63	-10.66	0.08	-1.3
BRKO	-0.22	-0.16	-0.07	-4.36		-0.09	-9.81	0.61	6.64		0.44	-2.14	-0.2	-1.74		0.81	4.81	0.68	4.52		0.24	-4.98	0.43	8.35		0.08	13	-0.09	-8.13		-0.09	-5.48	0.05	1.53		-0.07	-6.88	0.09	3.65		0.01	1.02	0	10.54		-0.1	4.96	-0.07	-15.92
BRKSN	-0.69	0.95	-0.75	-2.68		-0.96	-20.72	-0.37	2.95		1.29	6.83	1.29	0.2		0.76	17.68	0.66	0.06		0.7	0.13	1.05	0.54		-0.83	7.03	-0.13	0.24		0.37	0.2	0.38	0.15		0.43	-3.36	0.36	0.27		0.14	-1.39	-0.17	-0.04		-1.03	-3.42	0.02	-0.21
BRSAN	0.05	1.7	-0.21	0.53		-0.39	2.08	-0.14	-1.1		0.42	2.44	0.51	0.9		0.11	-2.08	0.1	0.35		0.16	-1.19	0.17	1.34		-0.65	-1.75	-0.23	-2.31		0.14	0.61	0.1	0.29		0.17	-1.14	0.09	0.52		0.19	2.33	-0.11	1.04		-0.65	-9.75	0.08	-1.81
BTCIM	-0.21	-37.84	-0.88	-2.87		0.59	86.09	8.08	4.75		0.12	11.53	0.33	0.54		-0.18	-88	0.9	1.01		-0.01	-23.44	0.57	2.92		-0.15	13.94	-0.22	-3.41		-0.08	-18.89	0.26	0.62		0.13	1.68	0.13	1.09		-0.04	-9.06	-0.01	2.62		-0.32	-4.34	0	-4.42
BUCIM	-0.34	8.83	-0.38	-1.21		0.87	-12.82	0.54	1.52		0.52	5.35	-0.44	-0.32		0.62	9.46	0.5	0.51		0.33	3.86	0.33	0.8		-1.21	-5.09	-0.32	-0.96		0.45	1.36	0.26	0.18		1.83	-1.22	1.01	1.17		-0.97	3.31	-0.91	-0.3		-1.74	-27.9	0	-0.93
BURCE	-0.03	2.19	-0.37	-5.86		-0.33	-6.84	0.42	6.63		0.13	-1.22	0.01	-0.44		1.16	10.36	1.34	2.39		0.18	-1.69	0.53	4.04		-0.37	0.92	-0.05	-4.35		0.18	4.31	-0.32	-0.23		0.21	-2.92	0.27	0.5		0.04	0.73	-0.06	1.38		-0.65	-6.92	0	-2.02
BURVA	-3.88	-9.79	-7.05	-45.51		-7.19	-4.92	-21.32	62.69		6.87	-6.58	-6.38	-5.13		6.44	22.27	35.19	-26.85		0.57	-4.79	12.47	-9.82		-0.45	-4.52	4.72	47.11		2.08	2.36	4.57	2.22		1.46	-0.03	4.43	2.35		0.12	0.07	-0.01	-0.49		-1.33	-6.36	0.15	1.14
CASA	0.07	15.52	-0.71	-1.07		-0.39	-4.02	0.17	0.7		3.79	26.41	5.07	-1.14		0.59	-15.25	1.53	1.65		0.48	-2.24	1.08	1.74		-0.45	-20.56	-0.03	57.96		0.62	4.31	0.35	185.88		0.16	-2.41	-0.02	-154.94		-0.54	20.35	-0.06	16.69		0.21	11.25	0.12	-82.02
CCOLA	0.5	9.02	0.46	0.3		-0.87	-12.23	-0.12	0.12		0.54	-0.12	0.83	0.54		0.39	9.61	-0.22	-0.01		0.4	6.22	0.19	1.07		-0.96	-13.02	-0.15	-1.27		0.27	-0.67	0.15	0.13		0.5	9.17	0.06	0.3		0.26	6.69	-0.01	1.3		-0.85	-7.14	-0.09	-1.61
CELHA	0.28	6.79	-1.26	-1.29		-0.4	27.43	0.25	1.59		0.35	40.94	-4.49	-0.41		0.31	-21.55	2.68	-0.31		0.3	-41.05	4.22	0.21		-0.85	19.01	0.64	0.64		0.15	-22.72	1.43	0.11		0.36	1.79	0.15	-0.01		0.29	-2.6	-0.52	-0.43		-1.78	-41.11	0.34	0.41
CEMAS	0.92	1.4	-0.07	-1.16		1.27	2.34	-0.75	-0.8		-0.46	-11.93	0.12	-0.28		0.52	6.68	0.11	-0.35		3.04	11.72	0.72	3.39		1.25	17.01	-1.77	-1.68		-0.3	-36.23	0.8	0.43		0.57	3.74	0.82	1.44		0.14	8.16	-0.18	0.47		0.01	33.68	-0.15	-1.1
CEMTS	0.44	8.09	-0.57	-2.13		-3.02	-17.73	-0.15	1.93		3.83	6.86	-0.04	-0.58		-0.21	8.36	1.06	0.82		3.41	4.92	0.49	0.59		-3.81	-8.65	-0.57	-0.05		2.29	2.79	0.52	0.29		0.95	-0.39	0.12	0.07		1.31	4.94	-0.15	-0.56		-2.73	-29.59	-0.16	0.46
CIMSA	0.9	20.07	0.15	0.18		-0.08	-1.51	0.08	0.18		0.12	2.51	0.21	0.29		0.29	6.77	0.37	0.98		0.33	3.39	0.32	2.73		-0.49	0.09	-0.26	-3.2		0.14	-1.8	0.16	0.43		0.27	0.01	0.11	0.55		0.04	-0.16	-0.06	2.44		-0.57	-10.74	-0.1	-3.52
CMBTN	-0.35	3.78	-6.14	-4.48		-0.73	32.02	1.53	4.2		1.42	5.98	8.94	0.8		0.66	-18.17	4.06	0.45		0.52	-10.8	1.66	0.8		-1.47	-5.99	-0.37	-0.23		0.2	1.52	0.46	0.1		0.36	-3.09	0.17	0.07		0.16	-4.84	-0.11	-0.12		-1.88	-19.64	0.06	0.08
CMENT	-0.7	3.08	-1.15	-5.15		-0.65	3.56	0.28	4.87		0.55	8.02	-0.03	-0.58		0.89	-1.85	1.15	0.34		1	-7.6	1.32	4.05		-0.93	6.23	-0.35	-2.08		0.35	-1.26	0.31	0.54		-0.52	-2.91	-0.4	-0.71		-0.14	-3.01	0.01	-0.16		0.28	-2.1	0.38	0.56
CUSAN	0.74	18.86	0.15	-1.2		-1.35	-6.4	-0.49	1.1		0.52	5.11	0.41	-0.03		0.54	6.37	0.82	0.49		0.63	-0.39	0.56	0.51		-1.14	-4.64	-0.38	-0.18		0.57	-0.66	0.37	0.17		0.62	0.94	0.22	0.2		0.43	5.38	-0.04	0.2		-0.58	3.18	0.04	-0.28
DAGI	0.99	-0.78	0.29	0.33		-0.48	-9.08	-0.53	0.08		-0.86	-4.02	-2.27	-3.67		1.29	7.39	1.71	1.8		1.01	6.7	1.72	5.11		-0.87	-10.51	-0.21	-1.93		0.27	2	0.26	0.23		0.76	2.29	0.8	1.25		-0.06	1.61	-0.6	0.49		-0.92	7.57	0.04	-1.77
DERIM	-0.03	-6.08	-0.36	-1.88		-0.45	7.98	0.64	2.64		0.3	-4.99	0.63	0.001		0.22	-2.12	0.4	-0.1		0.28	-1.15	0.95	0.59		-0.75	9	-0.81	-0.08		0.53	11.65	-0.29	0.14		0.42	-10.23	2.78	0.93		-0.02	-11.88	-1.13	0.13		-0.56	4.05	-0.02	-0.74
DESA	-0.23	1.08	-1.73	-6.34		-0.4	-1.82	1.39	7.59		0.69	1.64	1.59	0.38		0.62	5.43	0.62	-0.22		0.19	-6.42	1.05	0.76		-1.28	-18.37	-0.57	0.13		0.67	2.69	1.05	0.29		0.3	8.43	-0.2	0.12		0.43	2.75	0.41	0.68		-1.29	-5.51	-0.01	-0.85
DEVA	-0.63	8.76	-0.86	-4.59		-0.32	-27.87	0.31	5.18		0.45	6.9	0.38	0.05		0.35	10.41	-0.48	-0.97		1.07	8.99	1.3	1.39		-0.61	-14.19	0.01	0.74		0.5	6.62	0.26	0.06		0.41	5.57	0.23	0.25		0.38	7.54	0.18	0.88		-0.52	-10.25	0.19	-0.53
DITAS	1.07	10.7	0.19	-2.35		1.85	3.04	2.35	5.12		-1.03	16.83	-7.46	-2.27		1.51	12.61	4.41	0.36		0.75	-3.08	2.98	0.34		-1.26	-12.97	0.87	1.72		0.63	-6.03	1.63	0.36		0.4	3.01	0.08	0.03		0.34	3.07	-0.16	-0.22		-1.47	-21.53	0.22	0.23
DMSAS	0.29	7.47	-0.1	-0.55		-0.85	-7.24	0.08	0.83		0.49	11.76	-0.26	-0.18		0.38	7.71	0.49	0.3		0.54	-6.43	1.14	0.97		-1.33	-14.81	-0.37	-0.73		0.58	3.77	0.36	0.08		0.36	-0.28	-0.07	0.05		0.19	3.93	-0.11	0.14		-1.11	-24.6	0.19	-0.16
DOBUR	1.32	7.79	2.3	-7		-1.95	37.2	-6.95	10.95		2.32	-9.68	6.14	-1.63		2.34	4.8	5.54	-0.19		3.25	-11.5	10.51	6.19		-1.87	4.22	-2.16	1.33		1.21	-3.37	2.69	0.61		0.24	-8.17	0.3	-0.07		0.52	-1.95	0.38	-0.03		-2.21	-7.75	-0.3	0.21
DOGUB	-0.34	2.89	-0.08	-28.43		1.26	10.46	1.24	39.18		-0.8	-0.36	1.06	-6.68		2.06	0.14	1.56	-11.8		2.35	-4.49	2.03	-17.15		-2.82	8.55	-0.52	41.65		-0.11	-0.37	0.44	1.52		2.18	-1.11	0.74	0.55		4.31	1.66	-2.07	-35.02		-0.99	10.81	-1.41	35.2
DOKTA	0.45	15.59	-2.34	-2.72		-0.52	-16.6	-5.55	2.38		0.38	42.18	-10.45	-1.37		0.11	9.33	-6.53	-0.91		0.46	-7.39	12.96	1.21		-1.81	-120.05	-21.73	0.67		0.96	75.43	32.43	1.24		0.94	7.26	4.87	0.7		0.46	13.8	1.28	0.73		-0.82	-59.65	-0.42	-0.29
DURDO	0.34	13.45	0.39	-0.74		-0.33	12.89	0.85	1.56		0.39	29.65	-3.27	-0.61		0.22	-23.81	3.39	0.29		-0.03	-11.57	0.29	-0.64		-1.04	-23	1.07	1.27		0.47	0.65	1.02	0.28		0.67	10.1	0.91	0.48		0.26	4.36	-0.15	0.29		-0.92	-23.83	0.17	-0.62
DYOBY	0.27	4.67	-1.05	-1.29		-1.7	-37.04	0.55	1.31		0.95	14.11	0.18	0.05		0.63	14.24	0.57	0.08		0.48	14.82	0.84	0.37		-1.04	-9.84	-0.45	-0.1		0.48	-2.64	-0.1	0.01		0.3	-0.94	0.59	0.11		0.24	10.41	-0.12	0.18		-0.77	33.42	0.02	-0.16
EGEEN	-2.99	10.4	-2.84	-18.23		1.86	-20.66	0.46	16.44		5.73	5.66	4.14	4.42		0.59	13.31	-0.07	-2.27		1.29	10.04	1.48	4.22		-2.93	-28.3	-0.56	1.96		1.2	4.35	0.37	0.14		0.69	5.13	-0.27	-0.53		0.1	13.91	0.5	-1.14		-0.93	-44.38	0.28	1.76
EGGUB	-0.08	9.91	-1.61	-4.07		-0.37	-22.1	1.33	5.16		0.46	5.17	0.21	-0.16		1.58	9.73	1.44	0.42		1.06	6.9	1.48	0.82		-1.17	-8.72	-0.62	0.02		-0.78	1.31	0.63	0.11		1.05	6.6	0.39	0.17		0.51	8.35	0.02	-0.06		-0.82	-10.87	0.06	0.13
EGPRO	0.13	9.86	-0.71	-2.66		-1.34	-16.08	-0.88	2.16		1.34	13.41	0.6	0.33		0.45	5.52	1.15	0.17		0.37	-0.6	0.98	0.71		-0.82	-4.89	-0.52	0.07		0.35	4.58	0.41	0.09		0.4	4.32	-0.04	-0.17		0.07	1.29	-0.57	-1.58		-0.9	-26.11	0.81	1.9
EGSER	0.12	12.15	0.01	-1.81		-0.59	-13.64	0.35	2.42		1.12	8.86	0.5	0.3		0.68	7.6	0.21	0.18		0.56	3.56	0.41	1.17		-1.06	-4.64	-0.13	-0.95		0.45	3.97	0.11	0.21		1.06	0.78	0.74	1.37		-0.97	1.82	-0.74	-0.53		-1.21	-17.25	-0.02	-1.01
EKIZ	0.52	42.17	-2.19	-0.99		-0.65	-21.43	0.73	0.77		0.4	44.25	-4.24	-1.3		-0.09	-46.62	1.37	-4.92		1	-0.26	6.48	8.4		-1	-28.98	0.63	-1.42		0.78	64.44	-0.17	0.04		0.41	28.06	0.11	0.23		0.18	-40.78	0.16	1.94		-0.66	46.77	-0.01	-2.13
EMKEL	0.47	5.02	-0.11	-1.51		-0.05	8.33	-1.47	1.57		0.4	1.66	1.22	0.45		0.06	-5.06	0.59	0.42		0.25	0.3	0.83	1.74		-0.24	4.24	-0.15	-1.83		0.17	6.61	0.09	0.32		0.1	-4.08	0.33	0.63		0.14	6.16	-0.19	2.46		-0.01	44.95	-0.06	-3.27
EPLAS	-0.6	2.47	-1.87	-4.65		-2.79	-44.88	0.31	4.37		1.19	15.45	0.87	0.51		0.35	12.03	-0.1	-0.55		1.14	6.11	1.17	0.08		-0.18	16.76	-1.16	0.98		0.79	-0.59	2.17	0.69		0.76	2.15	0.05	0		0.47	2.17	0.27	0.29		-2.05	-80.85	0.09	-0.14
ERBOS	2.63	8.42	1.7	0.08		-0.75	-8.63	0.7	2.73		0.77	6.27	0.04	-0.08		1.11	4.81	0.39	0.23		0.96	2.97	0.32	0.6		-1.22	-16.59	-0.6	-0.47		-0.22	1.3	0.32	0.14		0.88	3.15	0.28	0.21		0.13	8.47	-0.14	-0.19		-1.11	-18.26	-0.07	0.05
EREGL	0.36	6.58	0	-0.18		-0.95	-2.21	-0.01	0.11		1.22	4.97	0.49	0.87		0.23	1.25	0	0.29		0.18	1.64	0.03	1.28		-1.06	-10.57	-0.25	-2.12		0.33	0.26	0.21	0.34		1.24	2.77	0.83	1.86		-0.68	4.59	-1.2	-2.33		-1.29	-16.69	0.31	0.25
ERSU	-4.21	-0.57	-2.29	-38.06		0.64	-2	-0.1	36.08		-2.24	0.29	-0.61	-7.52		1.12	0.51	0.89	0.48		2.6	0.43	0.9	0.11		3.08	-6.87	1.26	11.79		1.08	-6.47	0.52	2.96		0.73	6.97	0.42	3.42		-0.14	6.03	0.08	1.97		-0.27	0.31	-0.09	-4.91
FMIZP	-20.4	16.14	-23.66	-36.31		-5.79	-20.96	22.48	33.5		-0.39	9.53	-7.63	-17.32		19.24	11.6	19.83	16.23		30.56	7.37	2.37	-1.31		-16.04	-28.09	4.46	16.4		27.21	8.71	6.69	3.3		16.56	7.16	5.25	3.18		-12.44	16.02	-6.29	-8.76		-17.62	-34.57	1.88	5.9
FORMT	2.41	-0.57	-0.72	-0.18		-1.78	-8.12	-3.99	-1.27		0.63	8.37	0.82	-0.62		0.4	13.42	0.51	-0.5		0.46	-7.93	1.96	0.5		-0.62	27.29	-1.18	0.92		-2.19	-28.62	-1.71	-4.74		3.47	0.42	5.63	9.56		-3.13	0.33	-5.44	-29		1.86	-14.06	4.45	26.18
FRIGO	-0.57	8.61	-4.2	-9.84		0.13	-35.11	3.69	10.76		-2.81	16.29	-2.49	-1.07		2.61	4.6	3.71	1.63		1.77	4.99	1.43	0.88		-1.09	-29.4	-0.86	-0.29		-0.05	8.66	0.78	0.33		1.22	5.91	1.69	1.01		0.4	13.73	-0.5	0.33		-0.49	-10.09	0	-0.81
FROTO	0.79	10.33	-2.85	-1.73		-1.33	-29.47	4.93	2.82		1.55	12.04	-0.15	-0.07		0.62	25.59	0.43	-0.39		0.6	6.25	1.7	0.06		-2.56	-26.33	-1.03	0.61		0.77	12.92	0.82	-0.06		0.8	6.61	-1.04	-0.34		0.99	8.78	0.65	-0.39		-2.51	-29.54	0.39	0.88
GEDZA	-0.34	7.59	-0.55	-5.72		-0.18	-19.15	0.64	7.9		1.26	7.66	0.96	0.5		0.25	9.99	0.68	0.57		1.45	5.95	0.5	0.79		-0.75	-12.39	0.08	0.31		0.1	3.96	0.1	0.1		0.72	4.05	0.08	0.18		0.37	6.84	0.13	0.63		-0.9	-21.21	0.03	-0.63
GENTS	-1.35	6.75	-0.73	-2.2		-1.72	-22.06	-0.43	1.74		2.12	8.79	1.33	0.75		0.71	11.25	0.03	-0.16		0.72	3.03	0.5	0.74		-0.98	-0.81	-0.17	-0.29		0.93	-1.13	0.48	0.32		0.6	2.61	0.08	0.26		0.02	3.9	-0.14	0.32		-1.39	-20.92	0.06	-0.66
GEREL	-0.14	1.21	-0.73	-2.8		-0.66	-0.17	-0.31	3.14		0.05	3.51	-0.01	-0.76		0.2	0.4	0.35	-0.76		1.44	2.83	2.53	2.26		-0.41	32.16	-0.68	-0.08		0.16	-3.86	0.77	0.41		0.22	-10.93	0.35	0.33		-0.16	-12.05	0.12	0.55		-1.26	-6.94	-0.24	-0.74
GOLTS	-0.19	-0.49	-1.13	-2.11		-0.26	-3.29	0.94	2.08		0.4	3.41	0.89	0.45		0.19	-1.17	0.39	0.47		0.28	-1.28	0.4	1.76		-0.62	-10.69	-0.38	-1.92		0.13	2.49	0.24	0.17		0.22	2.98	0.15	0.53		0.17	-0.85	0.04	1.06		-0.41	7.41	-0.17	-1.82
GOODY	0.55	8.88	-0.22	-0.55		-1.9	-7.42	-0.09	0.6		1.1	4.58	0.69	0.18		0.38	10.06	-0.16	-0.24		1.39	-3.01	0.62	0.54		-2.81	-27.15	-0.21	-0.17		1.96	21.05	0.09	0.04		0.86	4.46	1.12	0.52		0.02	5.34	-1.4	-0.73		-1.7	-20.17	-0.02	0.12
GUBRF	-1.62	5.48	-8.68	-5.97		-1.19	-31.5	-8.51	4.45		3.36	-12.62	7.72	2.42		0.41	12.55	2.72	-0.53		1.27	15.97	7.44	0.84		0.01	40.41	3.29	1.78		0.29	-18.01	2.58	0.31		0.4	-0.16	1.64	0.37		0.23	0.19	0.15	0.3		-0.89	-17.68	-0.07	-0.36
HATEK	0.19	3.26	-0.23	-1.25		0.08	-5.32	0.41	1.36		0.5	5.77	0.05	0.19		0.32	0.77	0.23	1.19		0.24	0.44	0.15	3.13		-0.63	-10.95	0.02	-3.84		0.58	10.04	0.04	0.06		0.21	0.61	-0.04	0.66		0	-1.07	0.09	2.29		-0.6	-6.51	-0.01	-3.22
HEKTS	0.27	-0.99	-3.08	-7.39		-0.26	-17.34	2.68	10.2		0.5	6.75	1.7	0.57		-0.24	6.4	-1.06	-2.43		-0.17	2.02	1.59	0.08		-0.29	-16.84	0.4	3.89		0.78	-6.06	-0.15	0.1		1.01	3.84	3.75	2.25		-0.46	6.38	-2.9	-2.56		-0.86	-18.03	0.08	0.7
HURGZ	0.01	-6.45	0.64	-0.03		-0.51	10.63	-0.2	2.93		-0.38	-4.14	-0.24	-1.15		0.84	-0.92	0.84	1.93		0.47	-3.14	0.51	3.27		-0.54	2.96	-0.2	-2.26		0.51	3.79	0.19	0.43		0.09	-7.21	0.12	0.73		-0.1	-3.4	-0.05	1.05		-1.8	-42.69	-0.09	-2.02
IHEVA	-0.63	3.44	-0.34	-0.71		-2.96	-7.49	-0.39	-0.3		-0.3	5.28	-0.32	-0.76		2.04	1.44	-0.16	-1.15		-0.22	1.71	0.1	-2.08		-4.32	-10.58	-0.86	1.54		4.46	3.42	1.3	2		3.01	4.26	0.47	1.17		0.34	-0.03	0.22	0.96		0.1	-0.4	0.45	-0.42
IHGZT	5.63	0.56	-0.32	-1.52		-4.4	7.07	-1.59	-2.12		-3.24	1.74	-2.1	-6.15		7.01	-2.16	3.66	8.63		-3.35	-2.63	-0.97	-7.49		-3.16	-12.45	-0.69	4.7		6.36	6.93	1.82	3.36		0.89	1.26	0.37	1.28		1	-0.79	0.46	4.67		-0.13	2.42	0.07	-4.3
ISDMR	-0.16	7.61	-0.21	-1.3		-0.82	-6.22	0.25	1.4		1.59	6.14	0.38	0.64		-0.02	1.4	-0.14	-0.21		0.23	2.31	0.08	0.47		-1.75	-12.14	-0.42	-0.96		0.54	0.83	0.26	0.25		2.51	2.69	1.17	2.07		-0.8	5.99	-1.51	-3.16		-2.04	-22.32	0.47	1.21
JANTS	-1.44	16.03	-8.02	-22.58		-0.14	-27.11	11.38	27.55		5.71	7.47	2.68	0.58		5.01	12.39	4.26	2.58		1.31	10.29	0.45	-0.7		-2.76	-18.81	0.08	1.63		1.33	3.12	0.51	0.16		2.47	7.18	1.87	1.47		-0.6	11.37	-1.32	-1.44		-1.62	-19.42	-0.11	0.32
KAPLM	-0.39	10.29	-4	-4.53		-1.08	-5.14	-1.49	3.93		1.49	4.8	6.28	1.01		0.87	3.18	2.42	0.2		0.6	0.79	1.67	0.51		-0.67	12.55	-0.21	0.63		0.4	5.8	0.32	0.02		0.3	-11.67	0.71	0.2		0.23	-0.21	0.08	0.05		-1.22	-13.3	-0.16	-0.04
KARSN	-0.19	-4.51	-0.24	-8.04		-0.57	-5.37	0.93	10.66		0.44	2.55	-0.19	-0.31		0.21	1.41	0.2	-1.15		0.61	0.48	2.27	2.41		-0.66	-4.64	-0.42	-0.26		0.48	-0.64	0.88	0.51		0.2	1.29	-0.85	0.01		0.25	12.7	-0.82	0.01		-0.49	-3.18	0.58	-0.14
KARTN	-7.42	8.88	-2.44	-10.62		-16.73	-15.75	-4.13	8.01		25.05	5.85	8.72	4.99		4.23	7.8	1.15	0.44		1.6	6	0.62	-0.42		-3.28	-13.55	-0.43	1.44		1.2	4.16	0.22	-0.04		0.91	2.54	0.09	-0.28		-0.29	5.28	-0.14	-1.65		-1.94	-21.99	-0.01	2.04
KATMR	0.02	-3.53	0.6	0.6		-0.22	5.63	0.86	0.21		0.39	25.87	1.19	2.08		-0.08	-16.43	-2.57	0.21		0.14	-9.85	2.29	4.66		-0.33	-3.2	-0.68	-5.97		0.02	-14.44	0.75	0.58		0.25	13.03	0.03	1.42		0.41	-3.77	-0.41	-1		-0.18	13.81	0.26	-1.98
KENT	-26.26	5.07	-39.38	-129.84		-36.06	-13.44	-10.06	115.75		-1.84	4.45	0.76	-15.71		87.19	0.73	68.3	56.47		9.77	6.74	17.34	7.72		-2.59	2.34	-0.67	9.49		3.42	1.61	3.44	0.64		0.22	0.6	-0.24	-1.92		0.02	2.26	0.14	-6.07		-2.43	-11.81	-0.13	8.43
KERVT	0.1	4.09	-0.76	-1.25		-1.34	-35.94	-0.59	0.92		0.76	24.98	-0.86	-0.12		0.41	7.46	0.71	0.2		0.41	2.08	0.87	0.39		-0.79	-18.63	0.04	0.14		0.63	3.01	0.63	0.67		0.38	6.29	0.56	0.56		0.36	6.34	0.14	1.03		-0.56	10.96	-0.46	-1.81
KLMSN	0.23	8.75	-0.3	0.45		-0.65	-8.78	0.37	-0.41		0.38	12.11	-0.01	0.04		0.14	0.65	-0.2	-0.09		0.39	6.83	0.49	0.83		-1.48	-40.8	-1.05	-1.19		0.36	2.21	1.33	0.33		0.43	3.63	0.21	0.18		0.44	16.07	0.13	0.68		-0.67	-15.26	0.32	-0.52
KNFRT	-0.01	4.79	-0.77	-4.43		-0.45	-12.04	0.31	5.23		-0.45	2.21	-0.55	-0.85		0.57	0.7	1.79	1.05		0.94	7.74	0.55	0.09		-0.67	-9.11	-0.22	0.5		-1.64	-3.32	0.06	-0.11		2.3	0.93	1.83	2.07		-0.34	7.8	-1.2	-1.77		-0.81	-20.19	-0.13	0.18
KONYA	-9.56	-0.35	-2.84	-36.24		-3.27	-5.59	-0.44	37.64		11.93	0.52	7.34	4.14		7.99	6.45	3.71	2.5		1.72	0.13	1.4	-3.64		-4.54	-2.31	-1.25	7.44		1.28	0.68	0.78	0.13		2.14	1.27	0.45	-0.83		-0.07	-0.51	-0.05	-5.93		-0.13	-11.26	0.12	8.28
KORDS	0.28	6.91	-0.13	0.22		-0.24	-0.99	0.43	-0.08		0.41	2.29	0.32	0.51		0.24	0.35	-0.18	-0.36		-0.02	0.44	0.21	1.74		-0.84	-14.09	-0.31	-1.95		0.11	2.62	-0.04	0.09		0.1	3.69	0.04	-0.03		0.29	4.85	0.09	0.58		-0.81	-12.77	0	-0.71
KRDMA	0.49	15.89	-0.24	-0.2		-0.28	9.83	-0.14	0.09		0.37	13	-0.24	-0.15		0.31	-3.99	0.65	0.51		0.32	-3.11	0.74	2.02		-0.72	-6.43	-0.19	-1.81		0.1	-2.96	0.19	0.32		0.13	0.9	-0.01	0.31		0.22	2.51	-0.04	0.96		-0.93	-18.29	0.13	-1.33
KRDMB	0.47	15.89	-0.31	-0.3		-0.19	9.83	0.12	0.28		0.52	13	0.25	0.21		0.17	-3.99	0.21	0.32		0.24	-3.11	0.5	1.76		-0.72	-6.43	-0.2	-1.82		0.1	-2.96	0.19	0.32		0.13	0.9	-0.01	0.3		0.22	2.51	-0.04	0.98		-0.94	-18.29	0.13	-1.35
KRDMD	0.46	15.89	-0.34	-0.47		-0.18	9.83	0.14	0.48		0.62	13	0.57	0.41		0.14	-3.99	0.09	0.25		0.22	-3.11	0.45	1.71		-0.72	-6.43	-0.2	-1.82		0.09	-2.96	0.17	0.3		0.13	0.9	-0.01	0.29		0.22	2.51	-0.04	0.96		-0.98	-18.29	0.05	-1.37
KRSTL	-0.99	0.79	-0.09	-1.65		-3.42	-2.97	-0.79	1.58		3.59	0.43	0.99	0.67		0.08	1.26	0.04	-0.34		1.27	0.79	0.67	1.15		-1.05	0.64	-0.19	-0.37		0.83	0.36	0.23	0.25		0.51	0.91	0.26	0.51		0.03	-1.14	0.07	1.28		0.28	13.14	-0.75	-2.08
KRTEK	-0.29	6.1	-2.31	-3.37		0	-11	2.25	3.44		0.27	-3.24	-0.72	0.1		0.36	10	0.76	0.56		0.14	1.15	0.93	1.68		-0.67	0.4	-0.74	-2.16		-0.05	-9.76	0.81	0.57		0.42	10.59	0.25	0.34		0.23	4.04	0.06	0.83		-0.51	-17.65	-0.02	-1.51
KUTPO	-0.43	1.48	0.25	-7.31		-0.82	-7.07	0.29	10.25		3.67	4.11	2.08	0.98		-1.47	1.93	-0.68	-3.44		5.35	3.16	3.18	8.2		-0.99	-12.08	0.01	-1.27		0.47	4.71	0.1	0.14		0.61	0.66	0.07	0.33		0.27	4.09	0.06	0.84		-1.36	-9.15	-0.06	-1.32
LUKSK	-1.49	5.56	-3.29	-17		2.17	-1.6	4.55	20.69		0.53	13.99	-0.72	-0.77		0.74	-3.72	1.76	1.93		0.45	-3.17	0.97	3.65		-0.77	-12.44	-0.14	-2.77		0.34	1.05	0.27	0.53		0.37	4.07	0.2	0.95		0.17	4.71	-0.08	1.18		-0.32	3	-0.03	-2.39
MAKTK	-0.72	3.53	-1.74	-19.49		-2.49	-2.26	0.85	21.45		2.37	1.3	1.53	0.52		0.35	2.39	-0.05	-3.48		1.14	-2.11	1.77	4.11		-2.42	-5.13	-1.1	2.04		-0.16	-2.37	-0.28	-0.56		0.89	3.72	0.17	-1.17		1.03	1.47	0.09	-4.24		-1.9	-8.35	-0.86	5.97
MNDRS	0.02	3.14	-0.42	1.09		-0.52	3.13	0.09	-1.78		0.31	150.6	-44.82	-0.39		0.12	-23.55	36.24	-0.03		0.35	-76.49	7.22	1.23		-0.94	-54.59	0.79	-1.06		0.24	-14.46	0.92	0.19		0.47	25.96	-0.02	0.36		0.11	-11.41	0.07	1.18		-0.51	23.89	0	-1.56
MRSHL	-1.53	-36.99	5.43	-10.94		-2.39	0.82	-8.18	10.8		0.7	0.82	-10.53	-3.84		3.81	6.6	31.39	6.96		0.48	3.21	3.79	0.07		-1.94	-12.28	-1.04	1.68		1.48	10.5	1.33	0.24		0.5	-5.69	0.99	-0.02		0.19	11.36	0	-0.64		-1.14	60.99	-0.51	0.91
NIBAS	-10.59	-0.8	-3.94	-86.88		-44.11	6.36	-21.16	16.69		38.01	-8.5	18.27	22.9		14.88	-1.3	8.5	26.5		4.05	0.48	2.03	-13.65		-1.78	-1.67	-0.28	57.61		-5.75	6.59	-6.82	-23.7		2.95	0.2	1.01	-14.99		-1.61	-1.3	1.89	-42.35		4.99	16.65	3.31	83.75
NUHCM	-1.31	7.73	-2.66	-13.49		-1.41	-26.49	1.49	13.18		3.99	3.1	2.22	2.13		1.06	6.13	0.35	0.24		0.9	16.97	0.45	1.04		-0.93	-7.98	-0.41	-0.57		1.18	3.45	0.53	0.49		0.55	2.94	0.12	0.24		0.03	5.7	-0.05	0.38		-0.86	-11.76	-0.12	-0.57
OLMK	0.04	8.26	-0.61	-1.63		-2.05	13.1	-3.46	0.87		0.8	6.04	1.68	-0.12		1.61	-1.29	2.99	0.8		0.17	0.29	0.37	-0.91		0.42	32.25	0.49	2.01		0.23	-12.92	0.95	0.18		0.4	0.01	0.24	0.07		-0.07	-17.32	0	-0.03		-0.92	-14.56	0.22	0.08
OTKAR	0.16	25.56	-4.94	-5.18		-1.1	-45.66	5.15	6.47		1.14	17.35	3.04	1.1		0.08	15.06	-1.49	-0.72		0.51	24.11	0.62	0.23		-1.77	-50.28	-0.56	0.36		0.36	4.82	0.5	0.23		0.76	10.15	-0.15	-0.2		0.65	43.84	-2.81	-2.16		-0.96	-45.85	3	2.62
OYAKC	-0.21	5.85	-0.5	-4.34		-1.15	-10.23	-1.03	4.1		0.39	8.03	0.04	-0.88		0.87	7.61	0.14	-1.93		-0.67	2.24	1.77	-4.63		-4.6	-14.24	-0.39	7.9		2.39	5.41	0.82	0.51		1.28	3.57	0.66	0.69		3.06	-0.01	-0.36	-4.65		-1.31	-8.72	0.39	5.2
OYLUM	1.98	4.31	1.55	0.53		-1.12	-3.63	-0.47	1.34		0.09	1.68	-0.23	-0.47		1.02	4.61	1.05	0.76		0.05	2.41	-0.04	-0.99		-0.04	-6.24	-0.48	1.15		0.86	0.78	1.49	0.75		0.85	1.59	1.1	1.24		0.07	1.45	-0.55	0.1		-0.43	2.14	0.03	-1.1
PARSN	-0.15	3.6	-0.59	-2.11		-0.06	-6.68	0.58	2.41		0.31	8.31	0.02	0.46		0.09	4.3	-0.09	0.06		0.21	-1.35	0.79	4.28		-0.41	0.41	-0.83	-4.71		0.22	-4.08	-0.02	0.16		-0.05	-0.98	-0.18	-0.26		0.33	1.69	0.77	3.03		-0.08	12.54	-0.03	-2.24
PENGD	-1.29	-0.19	-0.6	-4.42		-0.64	0.21	-0.59	4.21		1.13	4.21	0.03	-0.82		3.14	7.41	2.27	3.89		-0.37	-6.91	-0.55	-1.15		-0.05	0.29	0.58	0.62		-0.07	7.39	-2.33	-0.83		0.41	27.71	-0.45	-0.3		-0.13	-12.39	-0.66	-1.42		-0.79	-29.57	2.38	2.05
PETKM	0.54	12.15	-0.1	0.14		-0.39	-3.54	0.07	-0.09		0.41	5.49	-0.05	0.24		0.09	5.87	-0.12	0.06		0.31	2.95	0.49	1.03		-0.85	-15.93	-0.32	-1.31		0.14	1.75	0.07	0.05		0.18	4.32	-0.3	-0.08		0.32	6.27	0.12	0.56		-0.81	-17.06	-0.26	-0.63
PETUN	0.1	3.02	-0.25	-0.68		-1.37	-9.96	-0.06	0.35		0.22	2.71	-0.3	-0.35		0.51	2.99	0.39	0.28		0.91	2.59	0.51	1.49		-1.05	-3.15	0.08	-0.89		0.51	1.2	0.07	0.11		0.5	3.32	0.07	0.4		0.31	2.13	-0.09	0.76		-0.99	-10.81	0.16	-1.14
PINSU	-0.04	-39.06	2.03	-1.81		-0.19	25.21	1.28	2.91		-0.12	28.05	-7.91	-0.69		0.36	10.64	2.66	0		0.22	-45.6	5.31	1.21		-0.41	22.73	1.9	0.45		0.14	-20.27	0.49	0.06		0.29	-5.52	0.32	0.1		0.1	-21.37	0.16	0.7		-0.62	18.03	0.17	-0.75
PNSUT	0.17	0.26	-0.14	0.22		-0.92	-0.73	-0.12	-0.52		0.32	0.13	0.06	0.09		0.28	0.51	0.09	0.19		0.4	0.16	0.22	0.74		-0.86	-0.87	-0.02	-0.8		0.4	1.48	0.11	0.09		0.42	0.1	0.13	0.37		0.3	0.04	0.01	0.85		-0.86	-4.06	0	-1.2
PRKAB	0.67	1.87	1.72	-1.49		-2.16	-8.1	-0.48	2.36		0.97	2.28	1	-0.22		1.05	3.08	2.57	0.51		0.98	2.53	1.11	0.16		-1.31	-7.09	0.3	0.65		0.5	2.72	0.38	0.1		0.83	1.97	0.24	0.08		0.41	1.87	-0.12	-0.05		-1.07	-11.16	0.09	0.01
PRZMA	-1.52	0.26	-0.6	-3.75		-0.59	-13.63	-0.13	1.73		2.45	14.74	0.08	0.35		-6.34	0.65	0.02	-19.97		-2.53	-0.37	-0.18	-18.59		3.22	-0.08	0.21	37.06		0.76	2.03	-0.25	-6.05		3.86	2.13	1.45	9.69		0.33	-0.35	0.25	3.92		-1.14	-2.36	0.05	-1.5
RTALB	-1.56	17.56	-2.6	-13.04		-3.75	-35.84	-1.07	13.15		-9.06	9.5	-5.81	-9.86		1.04	7.9	2.46	-2.31		12.96	23.67	9.2	11.11		0.76	5.82	1.44	6.08		-1.8	-1.52	0.32	2.04		3.32	-1.88	0.18	1.76		-0.52	5.54	-0.06	0.93		0.63	3.71	-0.18	-4.32
SAMAT	-0.89	-43.43	-0.2	-8.17		-2.53	-18.91	-3	8.96		2.25	9.97	5	1.22		0.53	1.74	0.99	-0.16		1.18	-2.4	1.01	1.51		-0.6	146.32	-0.56	0.15		0.09	-124.25	2.39	0.24		0.47	-7.02	0.07	0.38		0.19	-9.86	0.25	1.74		-1.01	-1.54	-0.09	-2.04
SANFM	0.73	14.11	2.17	-1.08		-0.59	-16.35	0.72	3.5		0.54	20.14	1.14	0.23		0.49	-0.4	1.4	0.29		0.33	0.72	0.68	-0.27		-1.02	-14.42	-0.3	0.59		0.73	13.06	1.8	0.38		0.41	4.62	0.3	0.04		0.25	-0.26	-0.02	0.3		-0.86	-3.51	0.43	-0.32
SARKY	0.85	14.73	-0.56	-0.63		-1.56	-18.44	0.94	0.77		0.86	10.1	0.44	0.06		0.76	13.31	1.26	0.28		0.55	3.17	-0.11	-0.01		-2.01	-12.13	-0.07	-0.14		0.64	0.57	0.42	0.04		0.81	1.85	0.08	0.01		0.62	6.09	0.05	0.08		-2.52	-9.91	-0.14	-0.1
SASA	0.21	14.5	-0.71	-4.07		0.45	-7.16	3.45	6.33		0.53	12.98	0.31	-0.44		0.12	-9.34	2.27	1		0.3	4.53	0.48	-1.16		-0.31	-38.52	0.27	1.93		0	2.47	0.35	0.09		-0.25	14.01	-0.61	-1.08		-0.08	13.61	0.26	-0.68		-0.88	-23.35	-0.38	1.5
SAYAS	0.34	15.44	-5.79	-4.1		3.42	-22.15	8.46	5.62		-1.35	48.86	-2.76	-0.25		-1.21	-0.44	2.85	0.11		3.42	5.09	2.02	-0.04		-0.72	2.65	0.68	0.86		1.08	-12.14	1.83	0.39		0.68	4.87	0.45	0.38		0.39	3.38	-0.05	0.59		0.48	90.5	-0.16	-0.8
SEKUR	-0.35	3.23	-1.62	-4		-0.13	4.81	2.08	4.43		0.35	0.52	0.36	0.09		0.41	-0.4	0.76	0.63		0.27	-1.55	0.28	0.86		-0.81	-4.17	-0.2	-0.96		0.43	-0.55	0.51	0.35		0.19	1.01	-0.06	0.18		0.15	1.84	-0.64	0.08		-0.67	2.89	-0.05	-0.71
SELGD	2.03	0.18	0.41	-1.06		0.08	-1.96	-0.27	3.78		4.96	0.81	0.04	-8.1		4.6	0.48	1.53	9.02		1.28	0.38	0.62	11.91		-0.98	-12.63	-0.08	-9.31		0.26	10.97	-0.26	-0.34		-0.02	1.74	-0.1	-0.2		0.6	-0.28	0.3	1.53		-0.6	-2.09	-0.03	-1.22
SILVR	0.47	3.54	-0.75	-0.52		-1.8	-17.44	-2.2	0.34		1.08	20.63	2.94	0.24		0.37	2.95	-0.23	-0.24		0.79	-1.61	2.87	0.59		-1.3	13.63	-0.52	-0.08		0.58	-7.28	0.91	0.03		0.82	1.87	1.36	0.46		0.2	7.07	-1.2	-0.31		-1.99	-12.55	-0.01	-0.1
SKTAS	0.14	-0.69	0.86	1.08		-0.2	23.57	0.05	-0.79		0.25	12.54	0.18	0.26		0.21	109.51	-2.93	0.32		0.05	-70.52	2.39	1.91		-0.55	-60.88	1.3	-2		0.04	-13.87	0.75	0.41		0.06	-3.43	0.19	0.62		0.01	-23.03	0.11	1.55		0.13	75.58	0.28	-2.2
SNPAM	-6.97	6.73	-4.57	-30.44		-2.07	3.61	-2.28	19.95		9.99	5.53	4.76	2.81		3.81	-0.14	3.93	6.19		2.64	-1.94	1.93	6.8		-0.66	-23.45	-0.25	4.92		0.99	9.88	0.43	0.26		0.54	0.66	0.1	-1.25		0.49	12.84	-0.21	-3.68		-0.47	-7.75	-0.15	5.72
TATGD	0.7	6.83	-0.25	-1.5		-0.95	-11.65	-0.59	1.38		0.28	11.58	-0.28	0.21		-0.03	1.87	0.27	-0.07		0.68	5.15	0.76	0.65		-0.81	-6.66	0.01	0.01		0.78	3.57	0.22	0.08		0.24	2.01	0.24	0.34		0.14	3.56	-0.06	-0.14		-1.02	-5.04	0.09	-0.11
TBORG	-0.73	7.81	-0.49	-4.98		-0.18	-22.71	-0.12	5.76		0.4	4.05	-0.16	-0.67		1.08	15.84	-0.09	-1.41		0.27	8.1	0.26	-4.05		-1.61	-32.79	0.23	6.52		1.19	8.33	0.59	0.17		0.97	15.61	-0.26	-0.77		0	4.72	-1.01	-4.9		-2.31	-25.59	1.46	5.68
TIRE	0.71	14.73	0.16	-0.73		-1.15	-5.71	-1.45	0.83		0.28	10.87	0.11	-0.29		0.37	3.52	-0.47	-0.83		0.34	4.16	0.43	-1.73		-0.47	9.14	1.6	3.28		0.98	0.15	2.02	0.47		0.71	2.8	1.33	0.59		-0.2	-8.45	-1.52	-0.95		-1.22	-29.54	0.12	0.36
TMPOL	0.25	7.52	-1.27	-3.1		-0.27	-15.24	1.61	3.62		0.5	6.82	0.48	-0.11		0.22	9.12	0.33	-0.59		0.42	5.22	0.83	0.03		-1.12	-44.64	0.02	1.23		0.54	10	0.67	0.3		0.65	1.6	1.56	1.4		-0.12	3.25	-1.5	-0.47		-0.25	37.13	-0.22	-1
TMSN	-0.66	1.62	-1.11	-5.36		0.41	-3.95	1.35	6.08		0.96	6.33	0.6	0.67		0.38	1.2	0.21	0.53		0.4	0.84	0.46	2.56		-0.47	3.48	-0.32	-2.69		0.08	-0.12	-0.1	-0.4		0.07	0.17	-0.06	-0.19		-0.09	-3.23	-0.1	-0.74		-0.49	4.04	-0.02	0.75
TOASO	0.83	16.76	0.72	-0.23		-1.18	-21.99	1.02	0.97		0.62	7.72	0.34	0.07		0.11	14.35	-0.27	-0.48		0.57	7.64	1.3	0.49		-1.86	-24	-0.67	-0.08		0.64	8.37	0.56	0.09		0.73	4.98	-0.21	-0.11		0.52	10.49	0.01	-0.19		-1.41	-25.51	0.46	0.49
TTRAK	0.26	13.38	-4.62	-2.19		-1.12	-17.12	4.87	2.23		1.35	18.57	1.54	0.29		0.47	15.83	0.13	-0.21		1.22	8.23	2.26	0.7		-1.37	-3.4	-1.03	0.07		0.72	8.41	0.57	0.01		0.78	3.04	0.77	0.17		0.22	2.05	0.03	0.2		-1.53	-35.68	-0.36	-0.04
TUCLK	0.43	5.74	0.96	0.66		-0.46	4.86	-0.46	0.16		0.27	4.96	-0.03	-0.11		0.26	2.63	0.65	0.84		0.15	-1.76	0.39	1.11		-0.55	-1.14	-0.04	-1.39		0.14	-3.38	0.38	0.4		0.38	4	0.23	0.38		0.11	0.47	-0.09	0.94		-0.45	7.72	0.02	-1.37
TUKAS	0.01	4.44	-0.68	-5.07		-0.85	-21.64	-0.95	5.56		0.38	-3.64	-2.21	-1.07		-0.63	12.2	-0.45	-1.45		0.22	6.4	-0.2	-3.98		-1.64	-29.87	-4.33	4.26		2.66	3.41	6	1.96		-0.21	18.75	-0.74	-0.91		0.78	9.8	0.7	-1.95		0.52	-14.14	3.46	4.93
TUPRS	0.52	15.04	0.08	0.34		-0.73	14.12	-0.22	-0.33		0.28	7.87	0.3	0.18		0.32	-5.24	-0.15	-0.01		0.21	-2.61	0.43	0.17		-1.65	-25.71	-0.67	-0.48		0.27	1.53	-0.35	-0.06		0.5	-1.07	0.56	0.12		0.39	7.16	-0.43	-0.14		-2.37	-41.39	-0.3	0.07
ULKER	0.16	3.77	-0.08	1.67		-0.63	-12.5	-0.24	-2.92		0.4	4.97	-0.07	-0.35		0.1	6.21	-0.21	-0.15		0.64	10.98	0.11	-0.63		-0.9	-23.94	-0.17	0.12		0.13	3.12	0.1	0.42		0.27	6.58	0.02	0.17		-0.01	2.4	0.03	1.56		-0.49	-13.07	0.06	-1.3
ULUUN	1.24	3.82	1	0.17		-2.37	-8.43	-1.14	-0.15		1.05	0.23	0.25	0.01		0.27	3.88	-0.06	-0.02		0.99	1.3	1.25	0.26		-1.83	-4.03	-0.09	-0.14		0.47	1.38	0.27	0.04		0.45	2.3	0.19	0.07		0.86	3.43	-0.05	0.16		-2.25	-5.41	0.05	-0.23
USAK	-0.03	2.4	-0.42	-1.05		-0.39	-1.35	0.04	0.72		0.23	-0.01	0.37	0.45		0.27	1.3	0.03	0.28		0.48	-0.24	0.55	2.14		-0.36	-3.54	-0.19	-2.07		0.23	1.41	0.13	0.06		0.13	-0.98	0.14	0.59		0.14	1.79	-0.01	1.5		-0.29	-0.38	-0.19	-2.26
VESBE	0.14	13.78	-0.64	-1.87		-1.08	-31.27	0.82	2.11		0.73	9.57	0.06	-0.02		0.2	13.69	0	-0.25		0.88	9.37	0.67	0.14		-1.6	-24.48	-0.69	0.25		0.63	5.09	0.57	0.1		0.47	6.05	-0.47	-0.31		0.4	15.91	0.48	-0.3		-1.12	-29.97	0.43	0.75
VESTL	0.25	8.87	-0.53	-0.55		-0.7	-23.56	0.65	0.59		0.42	6.19	-0.18	-0.01		0.23	6.7	-0.05	0.02		0.33	8.09	0.33	0.51		-0.67	-3.54	-0.25	-0.62		0.28	4.61	0.18	0.04		0.41	3.42	0.97	0.44		0.05	10.34	-1.41	-0.52		-0.76	-21.25	0.83	0.17
YATAS	0.2	7.25	-0.42	-1.51		-1.07	-23.92	-0.26	1.78		1.01	11.38	1.29	0.26		0.44	13.67	-0.28	-0.46		0.6	2.62	1.15	0.42		-1.58	-17.69	-0.89	0.07		0.41	4.15	0.26	-0.04		0.77	5.85	0.57	0.18		0.47	7.74	-0.41	-0.83		-1.57	-20.22	0.22	0.94
YUNSA	0.12	-11.35	0.08	-3.06		-1.19	-19.26	1.99	4.83		0.26	-1.14	0.2	-0.14		0.27	7.16	-0.81	-0.73		0.71	-2.36	2.2	0.85		-1.03	0.73	-0.61	0.47		1.06	4.59	1.59	0.26		0.21	-5.24	0.3	0.04		0.32	5.43	-0.13	-0.22		-1.18	-30.14	0.17	0.26

## Sheet: SWARA weighted
Objectives	Types (Max or Min)	Weightage used (SWARA)
ALTMAN Z SKOR	Max	0.163265
ROE	Max	0.163265
PD/DD	Max	0.244898
MVA mrg	Max	0.428571

## Sheet: Stock Return
					SR
		2021/06	2021/03	2020/12	2020/09	2020/06	2020/03	2019/12	2019/09	2019/06	2019/03
	ACSEL	-0.229622	0.175234	-0.206673	1.29819	0.775047	-0.169545	0.308008	0.214464	0.0580475	0.162577
	ADEL	0.160891	-0.291849	0.663265	0.437151	0.43487	-0.364331	0.321549	0.123936	-0.0399637	0.000909091
	AEFES	-0.0322581	-0.0905953	0.12089	0.051882	0.141033	-0.253466	0.0548446	0.10005	0.135922	-0.15
	AFYON	-0.186158	-0.180039	0.202353	0.276276	-0.328629	-0.210191	0.424036	0.160526	-0.130435	-0.0479303
	AKCNS	-0.277837	0.140266	0.215283	0.0534056	0.835227	-0.298805	0.478645	0.0812102	-0.0338462	-0.115646
	AKSA	0.366362	0.0514051	1.04628	-0.0219479	0.149842	-0.537226	0.405128	0.0540541	0.00762527	0.230563
	ALCAR	-0.25715	0.130721	1.61203	0.904308	0.884892	-0.351333	0.586462	-0.0176623	-0.0365365	0.0152439
	ALKA	-0.188863	0.285609	-0.0216606	0.214912	1.00704	0.0179211	0.371007	0.102981	-0.108696	-0.00240964
	ALKIM	-0.132863	0.169876	0.0520984	0.0375375	-0.732959	0.30167	0.448224	-0.00451467	0.0938272	0.0253165
	ALMAD	-0.190265	0.0319635	0.0841584	0.518797	1.375	0.365854	-0.0681818	0.257143	-0.204545	0
	ARCLK	-0.0526001	0.100658	0.225806	0.246231	0.469719	-0.350288	0.0945378	-0.0210797	0.150888	0.0702977
	ARSAN	-0.262887	-0.201646	0.133748	0.291165	0.778571	-0.217877	0.479339	0.287234	0.167702	-0.00617284
	ASUZU	-0.198947	0.0555556	0.187335	0.0661041	0.680851	-0.304848	0.294681	0.322082	0.0113798	0.13754
	ATEKS	-0.361829	0.583753	0.4855	0.607519	0.546512	-0.37636	0.420185	0.0329787	0.0561798	-0.0582011
	AVOD	-0.371147	0.0478036	0.131579	0.814324	1.17919	-0.0698925	0.120482	0.0779221	-0.00645161	-0.205128
	AYGAZ	0.0391061	-0.0225256	0.295314	-0.0575	0.428571	-0.345794	0.092766	0.338269	-0.0882658	-0.150044
	BAGFS	-0.16009	0.115	0.182033	-0.0174216	0.471795	-0.3044	0.640976	0.564885	0.315261	0.033195
	BAKAB	-0.159427	0.139604	0.408647	0.515856	0.39528	-0.077551	0.233221	0.168627	0.0472279	-0.0394477
	BANVT	0.209324	0.0519231	1.06349	0.0260586	0.51418	-0.126548	0.294979	0.0257511	0.410696	-0.081557
	BFREN	-0.220617	-0.13399	0.413624	1.87533	0.641357	-0.359434	0.483623	0.240635	-0.0174672	-0.0104938
	BLCYT	0.047093	1.59036	0.211679	-0.310692	0.272	0.430206	0.594891	0.7125	-0.0588235	0.25
	BNTAS	-0.2	-0.0618337	0.166667	-0.0428571	0.438356	0.15873	0.3125	0.263158	-0.0193548	0.0264901
	BOSSA	0.117506	0.401681	0.519149	0.140777	0.475645	-0.133995	0.722222	0.203085	-0.088993	-0.400281
	BRISA	-0.205147	0.364092	0.597756	-0.0103093	0.751389	-0.242902	0.533871	0.0420168	-0.17704	0.14218
	BRKO	-0.243056	0.297297	0.14433	0.901961	1.04	-0.193548	0.0689655	0.208333	0	-0.2
	BRKSN	-0.248182	0.233184	0.514431	0.395735	0.701613	-0.0948905	0.419689	0.269737	-0.146067	-0.0165746
	BRSAN	-0.204385	0.0172662	0.804023	0.32048	0.568548	-0.350218	0.212924	0.202548	-0.17801	0.224359
	BTCIM	-0.266124	2.39066	0.210797	0.140762	0.616114	-0.362538	0.263359	0.284314	-0.0933333	-0.06639
	BUCIM	-0.175573	-0.210843	-0.225505	0.488426	0.380192	-0.497592	0.253521	0.0642398	0.0470852	0.0136364
	BURCE	-0.164782	0.177926	-0.0304428	1.34632	0.756654	-0.0946644	0.516971	0.348592	-0.0779221	-0.0404984
	BURVA	-0.291237	-0.37495	-0.178495	1.78315	0.674634	0.335736	1.22706	1.92617	0	0.00675676
	CASA	0.0811966	0.103774	2.21212	0.571429	1.27027	-0.0149095	0.802303	-0.0169811	0.130064	0.267568
	CCOLA	0.217297	0.0566733	0.453348	0.0322581	0.24	-0.0956072	0.14905	0.127175	-0.0151615	-0.017487
	CELHA	-0.162983	-0.204396	-0.261364	0.157895	0.535354	0.0661538	0.463964	0.112782	-0.263838	-0.0966667
	CEMAS	-0.114504	-0.390698	0.25	0.154362	0.986667	-0.506579	0.1875	0.828571	-0.0666667	-0.0131579
	CEMTS	-0.160726	-0.0295597	0.0728745	0.794189	0.482944	-0.327295	0.462898	0.103314	-0.0756757	-0.0871711
	CIMSA	0.26601	0.140449	0.210884	0.48335	0.568038	-0.303965	0.217158	0.199357	-0.0646617	-0.119205
	CMBTN	-0.344314	0.0647555	1.3701	1.07807	1.11228	-0.309258	0.392038	0.14	-0.14078	0.058042
	CMENT	-0.315263	0.050885	0.0610329	0.458904	1.16497	-0.280667	0.279863	-0.288835	-0.0190476	0.322835
	CUSAN	0.144776	-0.133247	0.32363	0.595628	0.537815	-0.253918	0.345992	0.274194	0.00540541	0.0393258
	DAGI	0.481172	-0.703841	-0.271661	0.801626	2.23684	-0.24	0.351351	0.193548	0.165414	0.0725806
	DERIM	-0.136641	0.179671	0.1513	0.128	0.549587	-0.322129	0.898936	-0.290566	-0.387991	-0.0011534
	DESA	-0.280389	0.26694	0.477997	0.279612	0.48415	-0.235683	0.860656	-0.0542636	0.433333	0.0404624
	DEVA	-0.266491	0.256007	0.281997	-0.0218182	0.845638	0.160178	0.284286	0.263538	0.276498	0.319149
	DITAS	0.132075	0.13891	-0.579134	0.796866	0.619361	0.112971	0.686067	0.0718336	-0.0451264	0.0109489
	DMSAS	-0.0564175	0.0726172	0.0425868	0.318087	0.924	-0.281609	0.386454	-0.056391	-0.13355	0.237903
	DOBUR	0.195767	-0.157754	0.181053	0.461538	2.81232	-0.438221	0.873457	0.0384615	0.164179	-0.109635
	DOGUB	0.00784314	0.164384	0.164894	0.338078	0.682635	-0.197115	0.368421	0.357143	-0.291139	-0.344398
	DOKTA	-0.0446144	0.0248204	-0.0490683	0.225266	0.721022	-0.71696	0.787608	1.012	0.662971	0.106748
	DURDO	0.194142	0.13918	-0.558502	0.427027	-0.0159574	0.205128	0.413897	0.873585	-0.0619469	0.107843
	DYOBY	-0.243958	0.165493	0.30126	0.408065	0.561713	-0.189796	0.272727	0.296296	0.0206186	0.00344828
	EGEEN	-0.272008	-0.0858671	1.37204	0.167549	0.255182	-0.144014	0.229873	-0.0445344	0.0900265	0.317442
	EGGUB	-0.271122	0.442837	0.126455	0.516827	1.06262	-0.172691	0.402817	0.425703	0.041841	0.101382
	EGPRO	-0.171166	-0.14749	0.662609	0.533333	0.556017	-0.194653	0.277481	0.0151679	-0.298632	0.483653
	EGSER	-0.069248	0.305151	0.540419	0.29207	0.615625	-0.137466	0.204545	-0.0222222	-0.0454545	-0.0149254
	EKIZ	-0.12627	-0.0336606	-0.237433	-0.0869141	5.87248	1.44262	0.452381	0.448276	0.0740741	-0.181818
	EMKEL	-0.0234375	-0.567568	0.667606	0.228374	1.125	-0.144654	0.204545	0.65	0	-0.183673
	EPLAS	-0.325128	0.171171	0.725389	0.162651	0.509091	-0.12	1.36295	0.058	0.25	0.0416667
	ERBOS	0.706897	0.556098	0.372155	0.373162	0.34404	-0.351882	0.27514	0.3427	-0.769874	0.0160256
	EREGL	0.0806029	0.0221031	0.578224	0.131579	0.113182	-0.169248	0.319708	-0.159509	-0.10636	0.263158
	ERSU	-0.258873	-0.0303644	-0.0885609	0.217978	0.282421	0.676329	0.533333	0.588235	0.0365854	-0.108696
	FMIZP	-0.285714	0.176991	-0.0134921	1.47301	0.270574	-0.196071	1.71826	0.0166205	0.0129068	0.0330435
	FORMT	-0.224359	-0.671579	0.17866	0.259375	0.59204	-0.33	-0.566474	0.010219	0.0148148	4.31496
	FRIGO	-0.525118	0.821735	-0.0854403	0.267403	0.997792	-0.300926	0.62	0.818182	1.36559	0.0941176
	FROTO	-0.14537	0.534127	0.44	0.234133	0.438718	-0.304446	0.192761	-0.0496	0.281263	-0.0244
	GEDZA	-0.51981	0.337313	0.52968	0.543612	0.464516	0.14645	0.134228	0.120301	0.190157	0.0771084
	GENTS	-0.435849	-0.107744	0.953947	0.121771	0.361809	-0.0913242	0.510345	-0.0822785	-0.15508	0.0564972
	GEREL	-0.156894	0.0276873	-0.119082	0.102848	1.78414	-0.288401	0.386957	0.204188	-0.0353535	-0.439093
	GOLTS	-0.354839	0.389966	0.681337	0.368656	0.608072	-0.373243	0.344671	0.243421	0.0441609	-0.180209
	GOODY	-0.036036	-0.0705742	0.548148	0	0.574344	-0.153086	0.41115	-0.0741935	-0.0461538	-0.0552326
	GUBRF	-0.338988	-0.150494	1.67902	0.160405	0.892003	0.618363	0.588752	1.21401	-0.0586081	-0.0777027
	HATEK	-0.182406	0.442294	0.104513	0.363931	0.306065	0.0320233	0.671533	-0.0637813	0.152231	-0.035443
	HEKTS	-0.73386	0.592029	0.528045	-0.124211	0.420738	0.250623	-0.491439	0.163838	0.28436	0.13808
	HURGZ	0.251366	-0.128571	-0.0540541	0.597122	0.544444	-0.210526	0.425	0.0958904	-0.109756	-0.11828
	IHEVA	-0.321429	-0.255319	-0.160714	0.00900901	0.0471698	-0.322684	0.993631	0.539216	0.275	1.42424
	IHGZT	-0.43956	-0.551724	-0.412446	1.4331	-0.432	-0.265786	1.724	0.470588	1.26667	0.229508
	ISDMR	-0.0565254	0.189911	0.40612	-0.00964187	0.156051	-0.21598	0.302439	-0.0610687	-0.0839161	0.263251
	JANTS	-0.90826	1.0473	0.548553	1.94838	0.334252	-0.0660377	0.355814	0.323077	0.168224	0.000719424
	KAPLM	-0.308257	-0.0325444	1.1033	0.686254	0.794727	-0.0432432	0.206522	0.377246	0.056962	-0.122222
	KARSN	-0.112245	0.206154	0.0450161	0.0614334	1.3254	-0.202532	0.362069	-0.0491803	-0.186667	0.171875
	KARTN	-0.30441	-0.271481	-0.865271	0.57951	0.336707	-0.138497	0.151506	0.0698262	-0.0826087	0.0573092
	KATMR	-0.642077	0.188312	0.344978	-0.543825	1.04065	-0.359375	0.226837	0.621762	-0.690209	0.0613288
	KENT	-0.438166	-0.0494938	0.064352	-0.349747	1.86879	0.0187713	0.473596	-0.0261224	0.0381356	-0.00840336
	KERVT	-0.240575	-0.153495	0.100334	0.317181	0.343195	0.0368098	0.347107	0.415205	0.163265	-0.183333
	KLMSN	-0.531776	0.261049	0.133601	-0.0810313	0.272656	-0.42029	1.02198	0.189542	0.386707	0.671717
	KNFRT	-0.795155	0.123669	-0.117032	0.821123	0.447658	-0.0716113	-0.802025	0.266026	0.32766	-0.0159129
	KONYA	-0.225688	-0.0353982	0.971389	1.07306	0.557746	-0.345743	0.267757	0.192201	-0.0185894	0.0275281
	KORDS	-0.00162866	0.579421	0.341674	-0.0698234	0.311579	-0.2737	0.0307329	0.0470297	0.164265	0.0644172
	KRDMA	-0.0419355	0.0420168	-0.00833333	0.435407	1.18848	-0.279245	0.226852	0.00465116	-0.0811966	0.285714
	KRDMB	-0.0856698	0.218216	0.347826	0.153392	0.784211	-0.280303	0.222222	0	-0.0729614	0.273224
	KRDMD	-0.0819209	0.224913	0.705015	0.0430769	0.710526	-0.285714	0.192825	-0.00888889	-0.0625	0.100917
	KRSTL	-0.53405	-0.288265	0.75	0.0322581	0.682171	-0.145695	0.247934	0.375	0.1	-0.238095
	KRTEK	-0.546731	1.16491	0.492147	0.532086	0.815534	-0.364198	0.628141	0.452555	0.113821	-0.016
	KUTPO	0.0837209	0.0654113	0.707854	-0.157925	4.32322	-0.00453172	0.2282	0.120582	0.15625	-0.0857143
	LUKSK	-0.441371	1.72664	-0.0136519	0.912533	1.0929	-0.152778	0.411765	0.474699	-0.111349	-0.0371134
	MAKTK	-0.281863	0.196481	0.451064	0.00858369	0.894309	-0.345745	0.27027	0.0962963	0.0629921	-0.175325
	MNDRS	-0.30033	-0.0194175	-0.031348	-0.042042	1.72951	-0.0687023	0.597561	0.223881	0	-0.0694444
	MRSHL	-0.0211091	-0.088686	-0.259894	4.07222	0.903541	-0.0971813	0.51885	0.213178	0.114952	-0.0824742
	NIBAS	-0.413056	-0.667115	1.08668	1.60397	0.65	-0.0645161	-0.366053	0.115165	0.235211	0.775
	NUHCM	-0.449744	0.19212	1.35598	0.385023	0.654605	-0.232323	0.609756	0.171429	-0.092219	-0.103359
	OLMK	-0.0561644	-0.383966	0.335964	0.932462	0.133333	-0.355096	0.539216	0.225225	-0.128272	0.133531
	OTKAR	-0.151281	0.139761	1.3106	-0.0794923	0.443587	-0.347799	0.177778	0.184211	0.0867493	0.188669
	OYAKC	-0.106443	-0.186788	0.108586	0.118644	0.413174	-0.153716	0.476309	0.524715	-0.207831	0.0184049
	OYLUM	0.973366	-0.123142	-0.058	0.582278	0.00636943	-0.383104	1.40094	0.325	0.454545	0.0784314
	PARSN	-0.204463	0.364609	0.0916442	0.159375	0.641026	-0.309327	0.32967	-0.142665	0.651111	0.0273973
	PENGD	-0.273399	-0.19604	0.0609244	1.46632	-0.476965	0.782609	0.254545	0.0784314	-0.235	0.851852
	PETKM	0.0608696	0.154618	0.185714	-0.0163934	0.409241	-0.204724	0.0554017	-0.110837	-0.105727	-0.0992063
	PETUN	-0.212282	-0.111684	-0.113818	0.376113	0.871569	0.112323	0.358519	0.186292	-0.131298	0.279297
	PINSU	0.0127389	0.0565276	-0.0815822	0.382906	0.783537	0.413793	0.536424	0.208	-0.0234375	0.024
	PNSUT	-0.202756	-0.119584	0.0705009	0.169832	0.48629	-0.0213102	0.395374	0.333333	0.0271493	0.00151057
	PRKAB	0.24456	-0.0504132	0.20398	0.925287	0.63125	0.230769	0.140351	0.295455	-0.12	0.136364
	PRZMA	-0.272727	-0.0164234	0.22049	0.0158371	-0.0753138	0.111628	-0.0732759	1.27451	0.259259	0.0451613
	RTALB	-0.240705	0.0125495	-0.359018	0.350486	5.13684	1.4569	0.681159	0.078125	-0.0656934	-0.212644
	SAMAT	-0.307167	-0.331813	1.24872	0.27451	0.900621	-0.100559	0.612613	0.00909091	0.134021	-0.03
	SANFM	0.515152	0.213235	0.547213	0.479798	0.232365	-0.036	1.28311	0.273256	-0.0171429	0.4
	SARKY	-0.0635882	0.494344	0.315476	0.493333	-0.0721649	0.00414079	0.33795	0.0939394	0.0153846	-0.0469208
	SASA	-0.213517	0.653808	0.211504	0.54537	0.231471	0.134541	0.211599	-0.0434783	-0.165207	-0.02442
	SAYAS	-0.267218	2.41246	0.401977	0.455635	0.567669	0.1875	0.882353	0.4	0	-0.0957447
	SEKUR	-0.327796	1.24212	0.132198	0.891104	0.361169	-0.106343	0.763158	0.160305	-0.087108	-0.0304054
	SELGD	0.134956	-0.0923695	0.0204918	0.564103	1.02597	-0.104651	0.0617284	-0.0795455	0.375	-0.037594
	SILVR	-0.137987	-0.283721	1.04762	-0.0163934	1.55689	-0.226852	0.553957	0.0859375	0.122807	-0.149254
	SKTAS	-0.342529	-0.145383	0.159453	0.613971	0.0666667	-0.0377358	0.577381	0.2	-0.0849673	0.204724
	SNPAM	-0.387097	-0.0958333	0.656315	0.864865	0.719027	-0.0813008	0.333333	0.0453258	0.188552	-0.0480769
	TATGD	-0.0804233	-0.203204	0.0313043	0.15	0.577287	0.00794913	0.200382	0.244656	-0.018648	0.123037
	TBORG	-0.0909091	0.0226895	0.00724638	0.179487	0.176334	0.0865546	0.406619	0.0902062	-0.242188	0.0858961
	TIRE	0.245312	-0.157895	0.1226	-0.0518207	0.135135	0.519324	1.49398	-0.0514286	-0.120603	0.0698925
	TMPOL	-0.189205	0.530435	0.265127	0.216867	0.436538	-0.00383142	0.422343	0.129231	0.152482	-0.0784314
	TMSN	-0.351837	0.741294	0.613532	0.197802	0.677419	-0.322933	0.335417	0.24031	-0.110345	-0.0333333
	TOASO	0.446526	-0.0241745	0.378862	-0.0716981	0.610942	-0.387565	0.324458	0.0507772	0.127995	0.012426
	TTRAK	-0.25641	0.131363	0.827	0.269841	0.980634	-0.28231	0.281221	0.365761	0.0312704	-0.120344
	TUCLK	0.614987	-0.0420792	0.0163522	0.514286	0.315789	0.0101266	0.39576	0.40099	-0.102222	0.056338
	TUKAS	-0.148802	-0.181631	-0.0212121	0.097561	0.0488372	-0.303644	1.10751	0.146771	0.237288	1.48795
	TUPRS	0.194444	-0.166667	0.356784	-0.110615	0.18543	-0.404574	-0.116376	0.247826	-0.0785256	0.0694087
	ULKER	-0.0906933	-0.0898876	0.0122485	-0.0592593	0.236641	-0.121199	0.137913	0.0108025	0.140845	0.161554
	ULUUN	-0.230885	-0.42	0.100478	0.115261	1.17907	0.125654	0.33101	0.292793	-0.0305677	0.100962
	USAK	-0.289256	0.034188	0.337143	0.0416667	0.354839	-0.266272	0.251852	0.323529	0	-0.0810811
	VESBE	-0.218241	0.501957	0.457917	0.103937	0.569839	-0.250926	0.424802	-0.148315	0.0532544	0.40599
	VESTL	-0.254933	0.780627	0.212435	0.0689231	0.540284	-0.164025	0.259481	-0.0972973	-0.138867	1.32252
	YATAS	-0.059742	0.0193772	0.623596	0.0446009	0.625954	-0.286104	0.152276	0.378788	-0.101167	0.149888
	YUNSA	-0.116263	0.0150068	0.0397163	-0.0820312	0.751425	-0.130823	0.966862	0.14	-0.0301724	0.0642202

## Sheet: 2021 06
		2021/06	S	R	Q	MABAC	TOPSIS	FUCA	CODAS	COPRAS	ELC 3	CODAS2	COPRAS2	ELC2	FUCA2	MABAC2	TOPSIS2	S2	R2	Q2			S	R	Q	MABAC	TOPSIS	FUCA	CODAS	COPRAS	ELC 3
	ACSEL	-0.229622	0.206986	0.0735455	0.0927362	-0.00836902	0.799884	108.041	-34.0645	0.0123653	4.32392	-37.5116	0.0729882	-1.57671	54.9183	-0.0212844	0.694702	0.275697	0.0885353	0.14231
	ADEL	0.160891	0.164712	0.0698263	0.0614633	0.0339059	0.834866	55.8367	196.533	0.000543518	7.8353	87.6686	-0.00242967	7.11952	28.102	0.0590005	0.756625	0.195412	0.0747048	0.0638472		CODAS2	-0.843	-0.446	-0.699	0.843	0.784	-0.941	0.994	-0.721	0.653
	AEFES	-0.0322581	0.151404	0.0673468	0.0498838	0.047213	0.837842	27.9387	406.22	-0.000183846	8.94076	182.845	-0.00383109	12.5618	14.7143	0.0969803	0.766384	0.157433	0.0720521	0.0320128			0	0	0	0	0	0	0	0	0
	AFYON	-0.186158	0.192912	0.0701505	0.0794646	0.00570547	0.82107	84.3877	-129.572	0.00302251	6.15033	-81.0915	-0.01778	-9.69379	42.0408	-0.0167945	0.723217	0.271207	0.110447	0.168734
	AKCNS	-0.277837	0.179068	0.0699217	0.070535	0.0195495	0.82381	85.6938	155.448	0.00435294	6.70608	54.2454	0.0123228	5.76459	44	0.032993	0.738972	0.22142	0.0748068	0.0833179		COPRAS2	0.716	0.377	0.604	-0.716	-0.777	0.808	-0.652	0.909	-0.58
	AKSA	0.366362	0.139977	0.0533663	0.0242246	0.0586402	0.851036	20.1836	304.643	0.000855904	13.2065	139.01	-0.00734166	11.5939	9.61223	0.0982504	0.783317	0.156163	0.0626123	0.0182475			0	0.001	0	0	0	0	0	0	0
	ALCAR	-0.25715	0.231454	0.0784664	0.114507	-0.0328366	0.784896	120.979	-251.776	0.013594	2.01476	-151.956	0.060873	-19.9754	62.102	-0.0784237	0.661314	0.332837	0.131738	0.243462
	ALKA	-0.188863	0.174405	0.0704366	0.0683124	0.0242125	0.834794	79.7142	88.0669	-0.00176129	6.87544	20.8435	-0.0479638	5.06874	40.5102	0.0296211	0.754887	0.224792	0.0753578	0.0865726		ELC2	-0.973	-0.746	-0.926	0.973	0.927	-0.914	0.863	-0.558	0.901
	ALKIM	-0.132863	0.18011	0.0689871	0.0699452	0.0185072	0.831052	83.755	8.85159	0.000174054	6.86516	-17.0318	-0.0370979	2.24937	42.8775	0.013549	0.745319	0.240864	0.081527	0.106899			0	0	0	0	0	0	0	0	0
	ALMAD	-0.190265	0.319393	0.120939	0.225622	-0.120775	0.708978	106.571	-1212.6	0.01171	-71.3177	-573.605	0.0137489	-52.0636	54.0204	-0.289016	0.530137	0.543429	0.332052	0.672069
	ARCLK	-0.0526001	0.169402	0.0746327	0.0707594	0.0292154	0.828814	47.5101	276.277	0.000621472	6.19719	118.175	-0.0014579	7.38297	24.0612	0.0609453	0.750604	0.193468	0.079847	0.0693858		FUCA2	0.935	0.607	0.83	-0.935	-0.909	0.998	-0.917	0.743	-0.794
	ARSAN	-0.262887	0.151856	0.0689299	0.0522646	0.0467611	0.840937	19.7959	367.583	-0.00204107	8.64675	165.617	-0.0198024	10.7832	11.3061	0.0924618	0.770793	0.161951	0.0737457	0.0376719			0	0	0	0	0	0	0	0	0
	ASUZU	-0.198947	0.177358	0.0756626	0.0770824	0.0212595	0.824353	71.5918	212.639	0.00187859	5.48585	84.8026	0.00301334	5.88017	34.1836	0.0434156	0.74214	0.210997	0.0809489	0.0839127
	ATEKS	-0.361829	0.200877	0.0799159	0.097377	-0.00225965	0.808217	107.102	27.0819	0.00623296	3.04119	-7.442	0.0295038	1.44439	53.5918	-0.00608433	0.710902	0.260497	0.0854994	0.126888		MABAC2	-0.976	-0.672	-0.887	0.976	0.94	-0.96	0.905	-0.66	0.854
	AVOD	-0.371147	0.243623	0.0962234	0.145636	-0.0450056	0.776905	122.53	-166.911	0.00908901	-7.91833	-119.108	0.0333661	-21.9139	62.8775	-0.0828994	0.654053	0.337312	0.111867	0.219799			0	0	0	0	0	0	0	0	0
	AYGAZ	0.0391061	0.155235	0.0635322	0.0472121	0.0433826	0.840758	29.6122	284.481	0.00051866	8.85737	123.29	-0.0102657	8.69053	15.3877	0.0773094	0.768549	0.177104	0.067971	0.0410918
	BAGFS	-0.16009	0.166323	0.0719053	0.065224	0.0322946	0.830086	45.7551	303.966	0.00115317	7.01299	130.093	0.000403938	8.29566	22.7755	0.0668243	0.753073	0.187589	0.076929	0.0610525		TOPSIS2	-0.988	-0.747	-0.931	0.988	0.994	-0.928	0.804	-0.657	0.907
	BAKAB	-0.159427	0.179234	0.0761395	0.0788838	0.0193833	0.823078	76.0815	188.951	0.00233575	5.28804	75.1995	0.00793356	5.52765	37.4285	0.0391026	0.73939	0.21531	0.0814591	0.0878116			0	0	0	0	0	0	0	0	0
	BANVT	0.209324	0.14494	0.0526661	0.0263884	0.0536774	0.84994	34.4898	231.905	0.00178217	13.6289	101.798	-0.00811812	10.3919	16.2653	0.0828951	0.780097	0.171518	0.0617916	0.0285468
	BFREN	-0.220617	0.241729	0.0774357	0.119542	-0.0431116	0.764463	109.224	-468.726	0.0275678	-10.3569	-254.577	0.15194	-28.8341	55.3469	-0.118139	0.619928	0.372552	0.176804	0.334193		S2	0.976	0.672	0.887	-0.976	-0.94	0.96	-0.905	0.66	-0.854
	BLCYT	0.047093	0.105041	0.0597748	0.0109543	0.0935766	0.893236	46.2857	139.843	-0.031302	32.0713	63.4387	-0.296717	18.5836	22.7347	0.118829	0.849229	0.135584	0.0639511	0.0047689			0	0	0	0	0	0	0	0	0
	BNTAS	-0.2	0.156489	0.0706274	0.057402	0.0421286	0.843399	32.2857	272.468	-0.00395542	7.92229	119.007	-0.0427105	7.98869	16.3673	0.0756204	0.773301	0.178793	0.0755618	0.0526572
	BOSSA	0.117506	0.152138	0.0535189	0.0320044	0.0464792	0.845534	49.4489	195.879	0.0026142	12.2258	79.9769	-0.00759722	9.1249	25.0612	0.068895	0.772979	0.185518	0.0613571	0.0383634		R2	0.85	0.906	0.939	-0.85	-0.834	0.698	-0.606	0.277	-0.931
	BRISA	-0.205147	0.169473	0.0600609	0.0514806	0.0291444	0.829563	74.7754	190.865	0.00564436	8.71081	67.2399	0.0121173	7.02076	36.4694	0.0455756	0.748507	0.208837	0.0649295	0.0605494			0	0	0	0	0	0	0	0.02	0
	BRKO	-0.243056	0.190052	0.0807361	0.0917195	0.0085656	0.816793	84.3672	94.558	0.00268749	3.3096	30.7614	0.00990956	3.38792	43.1632	0.0163134	0.727026	0.2381	0.0863768	0.111431
	BRKSN	-0.248182	0.188157	0.078619	0.0877313	0.0104607	0.815612	92.6326	161.758	0.0042415	4.10852	58.6696	0.0211415	4.64743	46.8571	0.0247983	0.727083	0.229615	0.0841118	0.102047		Q2	0.981	0.803	0.959	-0.981	-0.948	0.908	-0.831	0.532	-0.934
	BRSAN	-0.204385	0.170358	0.0771885	0.0747445	0.028259	0.826788	44.8163	304.568	0.000291723	5.53094	131.965	-0.000387104	7.64256	23	0.063472	0.748341	0.190941	0.0825814	0.0712214			0	0	0	0	0	0	0	0	0
	BTCIM	-0.266124	0.26149	0.152603	0.231532	-0.0628729	0.754317	96.6121	132.914	-0.0056565	-17.0245	43.5144	-0.00462543	-6.48763	48.8775	-0.0549496	0.645509	0.309363	0.163265	0.268833
	BUCIM	-0.175573	0.164915	0.0635894	0.0533197	0.0337022	0.832218	59.755	231.98	0.00397882	8.27869	95.487	0.0136855	7.43719	29.5918	0.0590988	0.753773	0.195314	0.0680322	0.0547113
	BURCE	-0.164782	0.191274	0.0762539	0.0865375	0.00734332	0.817588	92.6734	30.1412	0.00385788	4.59411	-2.81282	0.00915028	2.30032	46.4285	0.00588892	0.725354	0.248524	0.0815815	0.112667
	BURVA	-0.291237	0.394585	0.156094	0.31909	-0.195968	0.629748	135.877	-1724.24	0.0385933	-85.4041	-818.053	0.155038	-66.2892	68.9387	-0.451905	0.399997	0.706318	0.428571	0.924243
	CASA	0.0811966	0.15182	0.0549291	0.0336759	0.0467978	0.841877	53.7142	240.328	0.004851	13.7633	97.3458	0.00800265	10.5092	24.6326	0.0728582	0.768689	0.181555	0.0644467	0.0396137
	CCOLA	0.217297	0.151627	0.063227	0.0445593	0.0469905	0.842635	22	303.837	5.57425e-05	9.21419	135.874	-0.00935401	9.27048	11.1428	0.0848615	0.771452	0.169551	0.0676445	0.0350346
	CELHA	-0.162983	0.171323	0.0674803	0.0624719	0.0272944	0.828803	65.6326	222.916	0.00313996	7.52425	85.088	0.00169227	6.80794	33.6326	0.0489177	0.748856	0.205495	0.0721949	0.0679331
	CEMAS	-0.114504	0.172046	0.0777607	0.076555	0.026571	0.82971	48.5306	234.589	-0.00137	5.27955	98.6568	-0.0186332	6.04715	24.1632	0.053388	0.751469	0.201025	0.0831935	0.0795486
	CEMTS	-0.160726	0.167128	0.0650008	0.0565702	0.0314891	0.833694	63.4897	192.253	0.0025164	7.97411	74.8002	-0.00255823	6.74118	31.3673	0.0514002	0.755322	0.203013	0.0695422	0.0624848
	CIMSA	0.26601	0.130987	0.0515141	0.016167	0.0676301	0.857919	17.8367	303.246	0.0020554	21.1809	133.742	-0.0128348	15.4176	9.30612	0.105352	0.794683	0.149061	0.0604399	0.0100184
	CMBTN	-0.344314	0.216634	0.0732213	0.0983174	-0.0180163	0.789463	105.49	50.756	0.0120419	-3.89711	-29.5981	0.0330373	-10.4061	53.551	-0.0346013	0.677039	0.289014	0.0796202	0.1401
	CMENT	-0.315263	0.194302	0.0745564	0.0861733	0.00431525	0.813065	104.163	54.4558	0.0064631	4.81363	3.98699	0.026167	3.33917	52.8979	0.00341096	0.718856	0.251002	0.0797654	0.112042
	CUSAN	0.144776	0.138412	0.0521724	0.0216664	0.060205	0.853956	31	242.685	0.00283893	19.1487	104.441	-0.00819922	13.2047	15.2857	0.0898678	0.786928	0.164545	0.0612123	0.022577
	DAGI	0.481172	0.169135	0.0819186	0.0802542	0.0294829	0.829639	33.5714	299.675	-0.00323658	4.1089	132.787	-0.0238243	6.6065	16.5918	0.0658919	0.753268	0.188521	0.0876419	0.0762961
	DERIM	-0.136641	0.194133	0.0920273	0.109235	0.0044843	0.810885	78.8366	196.076	4.63279e-05	-2.40841	77.924	0.00140486	0.977475	37.4285	0.0244155	0.722623	0.229997	0.0984569	0.121816
	DESA	-0.280389	0.203198	0.078371	0.0967744	-0.00458036	0.807944	108.469	-0.604548	0.00614385	3.36751	-26.6627	0.0178746	0.397563	55.5918	-0.0144296	0.708984	0.268843	0.0838465	0.130846
	DEVA	-0.266491	0.179786	0.0637229	0.0627628	0.0188311	0.823435	90.6938	83.2472	0.00694337	7.40828	20.1667	0.0253724	5.24056	45.5918	0.0230429	0.735206	0.23137	0.068175	0.0817067
	DITAS	0.132075	0.156115	0.0600228	0.043107	0.0425021	0.844118	46.1428	190.437	0.000613206	9.55483	78.406	-0.0177498	7.60024	22.9796	0.0649853	0.770869	0.189428	0.0642163	0.045153
	DMSAS	-0.0564175	0.161254	0.0661834	0.0544783	0.0373632	0.835971	41.2653	262.544	0.00137945	8.25294	112.076	-0.00260984	7.92769	22.1224	0.0678614	0.760687	0.186552	0.0708073	0.0519671
	DOBUR	0.195767	0.16413	0.065573	0.0554607	0.0344876	0.841083	58.8775	5.31051	-0.00128359	9.06542	4.87099	-0.0258343	4.3551	30.9796	0.0389078	0.757188	0.215505	0.0869384	0.0953986
	DOGUB	0.00784314	0.262555	0.100907	0.163643	-0.0639377	0.753388	98.3672	-932.602	0.0151506	-45.7342	-446.941	0.0404353	-28.9062	50.0816	-0.191668	0.591528	0.446081	0.27705	0.525003
	DOKTA	-0.0446144	0.164362	0.0533656	0.0394177	0.0342552	0.833438	71.6734	158.971	0.00685025	13.1957	47.0146	0.00627174	8.81758	37.7347	0.044821	0.753283	0.209592	0.0626123	0.057963
	DURDO	0.194142	0.147579	0.0547777	0.0308327	0.0510387	0.84634	33.3061	261.007	0.00207067	11.9518	114.613	-0.00261545	9.8874	15.449	0.0832422	0.775622	0.171171	0.0631433	0.0301247
	DYOBY	-0.243958	0.17426	0.0715238	0.0696637	0.0243575	0.826722	67.3265	223.171	0.00239787	6.63207	86.5081	0.000426078	6.46423	33.9387	0.0465246	0.745902	0.207888	0.0765209	0.0755876
	EGEEN	-0.272008	0.241262	0.0679497	0.106672	-0.0426445	0.770438	111.775	-516.435	0.0224292	-6.97804	-281.474	0.100192	-24.7551	56.9183	-0.124686	0.624993	0.379099	0.186563	0.352314
	EGGUB	-0.271122	0.177749	0.0615295	0.0585846	0.0208687	0.825322	84.6938	102.481	0.00655985	7.86872	24.2501	0.0151761	5.64293	42.8775	0.0255825	0.738837	0.22883	0.0658284	0.0766317
	EGPRO	-0.171166	0.167506	0.0616249	0.0523286	0.0311119	0.832966	70.8163	169.046	0.00414971	8.44295	62.5867	0.00613552	6.78754	34.5918	0.047493	0.753141	0.20692	0.0659304	0.0604836
	EGSER	-0.069248	0.156498	0.0572572	0.0396778	0.0421199	0.840349	51.3673	211.338	0.00334302	10.3292	88.081	0.00414859	8.3195	24.0204	0.0664504	0.765331	0.187963	0.0642053	0.044049
	EKIZ	-0.12627	0.106969	0.0530776	0.00327447	0.0916488	0.854919	50.7959	248.66	0.0117779	32.8894	91.9154	0.0130055	18.5615	25.7551	0.116159	0.791722	0.138254	0.0622743	0.00447627
	EMKEL	-0.0234375	0.168343	0.0708562	0.0650917	0.0302744	0.832237	53.8367	220.539	0.000827069	7.16488	91.331	-0.00655142	6.68137	27.6326	0.0551202	0.754188	0.199293	0.0758067	0.0682282
	EPLAS	-0.325128	0.197374	0.0757199	0.0896298	0.00124381	0.810213	104.673	70.6349	0.00678669	4.36137	6.99864	0.0253143	3.45456	53.6938	0.000292358	0.714899	0.254121	0.0810101	0.116051
	ERBOS	0.706897	0.137941	0.0643714	0.0375495	0.0606762	0.85854	18.4694	306.06	-0.00703511	10.2024	144.79	-0.0610293	10.6381	8.91836	0.103666	0.795163	0.150747	0.0688688	0.0227198
	EREGL	0.0806029	0.160916	0.0678809	0.0565187	0.0377012	0.835918	36.2653	278.777	0.000686501	8.11899	120.539	-0.00525755	8.20979	19.2653	0.0706184	0.761104	0.183795	0.0726234	0.0523844
	ERSU	-0.258873	0.328271	0.132022	0.245851	-0.129654	0.688386	128.837	-1368.06	0.0316958	-59.428	-646.387	0.143438	-55.4302	66.0612	-0.323689	0.49089	0.578102	0.36248	0.739171
	FMIZP	-0.285714	0.474153	0.158984	0.372501	-0.275535	0.524643	116.163	-1458.16	0.104215	-115.451	-875.503	0.577396	-63.8826	58.3673	-0.553821	0.22606	0.808234	0.346955	0.889149
	FORMT	-0.224359	0.170059	0.0815181	0.0802992	0.0285584	0.832288	53.102	273.709	-0.00521204	4.08983	113.274	-0.0520338	6.1336	26.0612	0.059123	0.75781	0.19529	0.0872134	0.0807455
	FRIGO	-0.525118	0.215043	0.064009	0.08511	-0.0164253	0.795731	108.51	-163.834	0.0136864	5.18059	-122.339	0.0399322	-17.3757	56.204	-0.0550561	0.679155	0.309469	0.112133	0.199464
	FROTO	-0.14537	0.172584	0.0607285	0.0543044	0.0260332	0.827376	66.1836	195.872	0.00498055	8.39262	61.9717	-0.00302615	5.75952	33.1428	0.0397004	0.74531	0.214713	0.0649713	0.0649734
	GEDZA	-0.51981	0.182782	0.0659545	0.0675882	0.0158358	0.822999	88.7142	37.2751	0.00606256	7.05464	-0.544534	0.0186841	3.62626	44.2653	0.0149553	0.732915	0.239458	0.0755832	0.0977803
	GENTS	-0.435849	0.17815	0.0675566	0.0668267	0.0204677	0.820739	82.8979	184.602	0.00700034	7.21611	69.7994	0.0377223	6.23562	40.4693	0.0378943	0.734618	0.216519	0.0722765	0.0762379
	GEREL	-0.156894	0.185676	0.0781231	0.0855281	0.0129412	0.818871	88.4285	157.664	0.00293476	4.36173	56.7065	0.00894894	4.72523	44.5306	0.0271081	0.732133	0.227305	0.0835812	0.0996098
	GOLTS	-0.354839	0.189081	0.0813655	0.0919492	0.0095364	0.815248	90.0611	183.98	0.00287297	3.09338	66.9383	0.00984732	4.17858	44.4081	0.0257455	0.727583	0.228667	0.0870502	0.105334
	GOODY	-0.036036	0.158151	0.0634941	0.0489785	0.0404664	0.838955	37.653	262.922	0.00120332	8.67401	111.509	-0.007525	8.13663	19.7347	0.0708617	0.765312	0.183551	0.0679302	0.0458291
	GUBRF	-0.338988	0.237313	0.0771147	0.116365	-0.0386955	0.766399	113.592	-32.2896	0.0197404	-19.2606
	HATEK	-0.182406	0.172668	0.0742131	0.0722378	0.0259498	0.827875	58.4081	229.285	0.00116838	6.12607
	HEKTS	-0.73386	0.215859	0.0823191	0.109899	-0.0172419	0.798745	109.388	-55.1274	0.00668801	1.30955
	HURGZ	0.251366	0.183232	0.092733	0.103378	0.0153859	0.816315	47.7142	281.822	-0.00234765	-2.11808
	IHEVA	-0.321429	0.174555	0.0738698	0.0729583	0.0240628	0.823772	63.7958	250.503	0.00318226	6.11778
	IHGZT	-0.43956	0.156799	0.0793628	0.0691787	0.0418189	0.848832	58.6734	224.865	-0.0130254	13.4084
	ISDMR	-0.0565254	0.165863	0.0659163	0.056996	0.0327542	0.832222	57.653	228.996	0.00305742	8.00459
	JANTS	-0.90826	0.266512	0.0820049	0.141043	-0.067894	0.739788	111.082	-732.359	0.0287346	-37.8919
	KAPLM	-0.308257	0.192848	0.0608048	0.0670315	0.0057697	0.810124	96.7142	66.1424	0.0108267	6.85939
	KARSN	-0.112245	0.211045	0.0890328	0.115802	-0.0124272	0.803043	99.5305	-66.0883	0.00358358	-1.37532
	KARTN	-0.30441	0.235614	0.085747	0.126753	-0.0369963	0.764964	109.837	-196.559	0.0291838	-12.5005
	KATMR	-0.642077	0.175804	0.0871637	0.0913653	0.0228134	0.821601	40.7142	310.169	-0.00194632	1.53402
	KENT	-0.438166	0.907495	0.428571	1	-0.708877	0.127894	129.551	-5558.28	0.181881	-137.652
	KERVT	-0.240575	0.174352	0.07263	0.0711877	0.0242659	0.826318	68.4285	226.114	0.00229198	6.37157
	KLMSN	-0.531776	0.156922	0.063742	0.0485414	0.0416957	0.837609	34.8367	304.642	0.0016171	8.7115
	KNFRT	-0.795155	0.183799	0.0712949	0.0753036	0.0148189	0.822172	89.6326	90.0503	0.0042577	6.13272
	KONYA	-0.225688	0.34699	0.126142	0.249716	-0.148372	0.669028	130.102	-1303.35	0.0452022	-77.4904
	KORDS	-0.00162866	0.16004	0.0672514	0.0551377	0.0385779	0.8358	34.5102	295.343	0.000949573	8.22989
	KRDMA	-0.0419355	0.144006	0.053201	0.0265158	0.0546113	0.848159	31.8163	281.424	0.0028318	14.6871
	KRDMB	-0.0856698	0.144794	0.0532833	0.0271159	0.0538234	0.847598	34.4694	276.75	0.00302308	14.6376
	KRDMD	-0.0819209	0.145548	0.0533245	0.0276405	0.053069	0.847207	36.0612	269.052	0.00316913	14.5953
	KRSTL	-0.53405	0.182761	0.0789241	0.084774	0.0158563	0.817799	73.9999	209.67	0.00360083	4.39362
	KRTEK	-0.546731	0.187444	0.0687964	0.0742615	0.0111739	0.816645	91.8775	125.011	0.00681166	6.47968
	KUTPO	0.0837209	0.195571	0.0776081	0.0910104	0.0030467	0.814185	89.6938	-28.6835	0.00457646	4.20118
	LUKSK	-0.441371	0.242807	0.0698263	0.110123	-0.0441891	0.774242	116.796	-467.008	0.0175158	-4.43492
	MAKTK	-0.281863	0.243084	0.0736981	0.115431	-0.044467	0.775811	116.367	-562.505	0.0142176	-13.3319
	MNDRS	-0.30033	0.167074	0.074442	0.0690557	0.0315438	0.828439	46.0408	327.705	0.000712475	6.4109
	MRSHL	-0.0211091	0.256889	0.150982	0.226516	-0.058272	0.753265	95.8978	-170.785	-0.00664872	-5.63176
	NIBAS	-0.413056	0.52172	0.289764	0.575561	-0.323102	0.475427	134.184	-3468.68	0.0732477	-109.995
	NUHCM	-0.449744	0.223143	0.0656875	0.0923828	-0.0245254	0.790491	111.714	-311.076	0.0150538	4.51703
	OLMK	-0.0561644	0.167053	0.0646766	0.0560933	0.0315645	0.832107	65.5714	212.827	0.00338713	8.00537
	OTKAR	-0.151281	0.168698	0.0566747	0.0465072	0.0299196	0.820719	88.0203	41.162	0.0145064	23.3656
	OYAKC	-0.106443	0.180833	0.0692732	0.070775	0.0177842	0.823903	83.4489	95.7199	0.00460885	6.73043
	OYLUM	0.973366	0.147821	0.0722104	0.0541001	0.0507969	0.848044	20.4285	320.867	-0.00634609	8.41556
	PARSN	-0.204463	0.178164	0.0735646	0.0748028	0.0204531	0.823888	77.5101	189.672	0.00299722	5.95937
	PENGD	-0.273399	0.197602	0.0807933	0.0964998	0.00101537	0.80876	98.9999	86.8374	0.00613088	2.89013
	PETKM	0.0608696	0.14907	0.0572572	0.0350498	0.0495475	0.844664	28.1632	295.233	0.00149518	10.7184
	PETUN	-0.212282	0.171763	0.0746708	0.0722813	0.0268541	0.827606	56.5918	253.391	0.00109728	6.05121
	PINSU	0.0127389	0.243789	0.15493	0.223588	-0.0451715	0.762519	65.1428	197.776	-0.0107369	-15.3285
	PNSUT	-0.202756	0.17323	0.079935	0.0801759	0.0253871	0.8252	46.7755	291.722	-0.000290625	4.55322
	PRKAB	0.24456	0.163462	0.0768642	0.0700174	0.0351554	0.835248	46.1836	232.045	-0.00284622	6.4763
	PRZMA	-0.272727	0.195525	0.079935	0.0940677	0.00309214	0.809184	95.4897	115.184	0.00650038	3.31717
	RTALB	-0.240705	0.203641	0.0616358	0.0748586	-0.00502341	0.801035	104.51	-286.461	0.0176613	13.7184
	SAMAT	-0.307167	0.288358	0.163265	0.262412	-0.089741	0.736958	104.041	-93.763	-0.00360106	-18.9323
	SANFM	0.515152	0.136086	0.0535189	0.0220022	0.0625317	0.855905	27.204	259.451	-0.000969511	13.836
	SARKY	-0.0635882	0.147876	0.0523364	0.0277802	0.0507418	0.846924	39.5918	260.779	0.00227916	13.0723
	SASA	-0.213517	0.162882	0.0543531	0.0398051	0.0357351	0.837252	70.7142	111.608	0.00568632	11.968
	SAYAS	-0.267218	0.188415	0.0613201	0.0649529	0.0102025	0.808797	81.6122	77.1308	0.0123315	5.75882
	SEKUR	-0.327796	0.191429	0.0742703	0.0840036	0.00718851	0.81485	96.1632	101.524	0.0056859	5.0123
	SELGD	0.134956	0.16686	0.0800876	0.0764088	0.0317577	0.835488	43.4897	243.317	-0.00515577	4.9499
	SILVR	-0.137987	0.171465	0.0736791	0.0707801	0.0271526	0.828414	56.0816	257.748	0.000865003	6.29584
	SKTAS	-0.342529	0.166922	0.0817469	0.0786478	0.0316957	0.828126	36.5101	334.105	-0.00216987	4.48395
	SNPAM	-0.387097	0.313544	0.107401	0.204026	-0.114927	0.699304	121.245	-1059.28	0.0397946	-65.9692
	TATGD	-0.0804233	0.164677	0.067404	0.0582298	0.0339402	0.835607	51.102	221.357	0.000841145	7.94695
	TBORG	-0.0909091	0.181248	0.0655349	0.0660761	0.0173697	0.822602	87.5509	68.8124	0.00667257	7.15399
	TIRE	0.245312	0.14484	0.0523364	0.0258886	0.0537777	0.849313	29.9387	261.19	0.00172642	13.3289
	TMPOL	-0.189205	0.175957	0.066088	0.063513	0.0226604	0.827166	80.0203	145.403	0.00425812	7.36951
	TMSN	-0.351837	0.197382	0.0773411	0.091785	0.00123525	0.811034	105.592	45.0089	0.00607166	3.95389
	TOASO	0.446526	0.135798	0.0518021	0.0195464	0.0628193	0.85563	19.6734	287.488	0.00090836	16.4896
	TTRAK	-0.25641	0.180107	0.0549258	0.0512973	0.01851	0.816789	76.1836	165.382	0.00959859	8.89866
	TUCLK	0.614987	0.154275	0.069483	0.0545051	0.0443424	0.839673	23.3877	320.846	-0.00135747	8.50532
	TUKAS	-0.148802	0.18596	0.0719625	0.0775355	0.0126577	0.82112	90.3468	63.0962	0.00431096	5.86764
	TUPRS	0.194444	0.14201	0.0530776	0.0251085	0.0566072	0.849306	20.1632	306.17	0.00187812	13.8304
	ULKER	-0.0906933	0.161564	0.0732404	0.0640292	0.0370536	0.832058	34.3469	355.391	-0.000225056	7.08495
	ULUUN	-0.230885	0.155969	0.073145	0.0604166	0.0426485	0.840908	26.2653	300.531	-0.00367788	7.56411
	USAK	-0.289256	0.175605	0.0758534	0.0762433	0.0230121	0.824828	64.0407	236.07	0.00168618	5.5401
	VESBE	-0.218241	0.157053	0.0546411	0.0365546	0.0415648	0.839513	62.2448	205.388	0.00455944	11.6018
	VESTL	-0.254933	0.161099	0.0635131	0.0508405	0.0375188	0.835815	47.5714	260.34	0.00237468	8.47989
	YATAS	-0.059742	0.166895	0.066603	0.0585493	0.0317226	0.832615	58.7959	219.195	0.00243857	7.8888
	YUNSA	-0.116263	0.204975	0.102079	0.12932	-0.00635796	0.80307	76.2448	145.88	-0.00157276	-9.68511

## Sheet: 2021 03
		2021/03	CODAS	COPRAS	ELC3	FUCA	MABAC	TOPSIS	S	R	Q	CODAS2	COPRAS2	ELC2	FUCA2	MABAC2	TOPSIS2	S2	R2	Q2			CODAS	COPRAS	ELC3	FUCA	MABAC	TOPSIS	S	R	Q
	ACSEL	0.175234	0.251394	-0.00710989	-5.5407	57.204	0.00405581	0.343787	0.669453	0.3868	0.68637	-2.35902	0.0291566	-2.99713	30.6938	0.00430347	0.348343	0.708354	0.353457	0.744859
	ADEL	-0.291849	-1.20933	0.0514685	-5.42839	82.4693	-0.0161004	0.325509	0.689609	0.402541	0.742453	-5.84058	-0.0313368	-4.93982	42.4081	-0.0263798	0.31685	0.739037	0.381762	0.840982		CODAS2	0.84	-0.522	0.716	-0.868	0.918	0.915	-0.918	-0.628	-0.889
	AEFES	-0.0905953	-0.158207	0.0052487	-6.31489	104.898	-0.0309981	0.321491	0.704507	0.428571	0.813091	-5.29488	-0.00330694	-9.96215	54.4897	-0.0610685	0.312512	0.773726	0.428571	0.976387			0	0	0	0	0	0	0	0	0
	AFYON	-0.180039	3.57474	0.0365567	2.14961	51.7347	0.0220946	0.344581	0.651414	0.38551	0.662121	-1.40647	-0.020193	1.77646	26.551	0.0280037	0.350044	0.684654	0.351135	0.705887
	AKCNS	0.140266	1.63507	-0.0138904	-2.88065	62.8571	-0.00181994	0.337506	0.675329	0.403867	0.728017	-2.68522	0.0230841	-3.96311	32.4081	-0.0128496	0.337918	0.725507	0.384147	0.825432		COPRAS2	0.348	-0.867	0.074	-0.628	0.37	0.656	-0.37	-0.482	-0.453
	AKSA	0.0514051	-0.836747	0.00591365	-8.06234	94.5305	-0.0253474	0.326484	0.698856	0.41215	0.773023	-5.29733	0.00740677	-7.40245	50.8367	-0.043606	0.319524	0.756264	0.399041	0.897455			0.003	0	0.543	0	0.002	0	0.002	0	0
	ALCAR	0.130721	-6.28311	-0.0283854	0.508461	47.7346	0.0274392	0.3567	0.64607	0.366829	0.61784	-0.373406	0.0670103	3.34731	24.1632	0.0252899	0.367972	0.687368	0.317544	0.649232
	ALKA	0.285609	-13.637	-0.0409613	-13.9447	65.2652	-0.0216821	0.334201	0.695191	0.395477	0.734827	-5.0942	0.0743117	-17.3817	32.1836	-0.0455266	0.330742	0.758184	0.36906	0.846153		ELC2	0.775	-0.224	0.857	-0.754	0.932	0.746	-0.932	-0.556	-0.858
	ALKIM	0.169876	-10.2495	-0.0250792	-16.8671	61.7958	-0.0177144	0.338605	0.691224	0.386191	0.711243	-4.28253	0.0615645	-12.3827	31.3061	-0.0283418	0.338457	0.740999	0.352361	0.790789			0	0.063	0	0	0	0	0	0	0
	ALMAD	0.0319635	5.503	0.0277032	31.83	54.9999	0.0486896	0.404362	0.624819	0.302434	0.461806	11.2039	0.0419282	17.0964	29.8163	0.121161	0.453026	0.591497	0.201745	0.299504
	ARCLK	0.100658	-0.489315	-0.000763359	-6.37608	100.02	-0.0231758	0.326787	0.696685	0.41552	0.777252	-4.95931	0.0104209	-7.16021	52.8979	-0.0444335	0.320131	0.757091	0.405102	0.90961		FUCA2	-0.703	0.606	-0.486	0.997	-0.818	-0.877	0.818	0.834	0.921
	ARSAN	-0.201646	-3.6131	0.0133813	-8.69593	115.612	-0.0362442	0.319636	0.709753	0.422045	0.806153	-7.04534	-0.00184302	-9.83489	60.2652	-0.0644399	0.30815	0.777098	0.416836	0.960153			0	0	0	0	0	0	0	0	0
	ASUZU	0.0555556	2.84555	-0.00220375	-0.593704	70.1836	-0.00129297	0.334866	0.674802	0.409855	0.739524	-2.66779	0.00611314	-3.05546	38.653	-0.0150647	0.333811	0.727722	0.394915	0.84812
	ATEKS	0.583753	8.66447	-0.025925	-1.95773	37.1224	0.0162177	0.350421	0.657291	0.391426	0.681162	1.06343	0.0324409	-1.3677	20.1632	0.0227146	0.361942	0.689943	0.361774	0.732854		MABAC2	0.775	-0.343	0.729	-0.889	0.942	0.855	-0.942	-0.741	-0.96
	AVOD	0.0478036	5.93519	-0.0386783	-0.511338	32.6326	0.0317249	0.360342	0.641784	0.377837	0.635016	3.15778	0.0523737	5.09789	16.2449	0.0436354	0.377556	0.669022	0.337338	0.65804			0	0.004	0	0	0	0	0	0	0
	AYGAZ	-0.0225256	-1.54779	-0.00573969	-0.296046	89.0407	-0.00639768	0.33074	0.679907	0.414086	0.754223	-3.86039	0.0124639	-4.78388	46.6734	-0.0306476	0.325574	0.743305	0.402523	0.884722
	BAGFS	0.115	4.32702	-0.0111142	4.11261	81.0816	0.00277871	0.335186	0.67073	0.418209	0.751578	-1.69829	0.0060902	-1.91709	41.4285	-0.0170442	0.334678	0.729702	0.409937	0.878143		TOPSIS2	0.755	-0.616	0.606	-0.909	0.876	0.98	-0.876	-0.714	-0.897
	BAKAB	0.139604	-0.437663	-0.00821225	-4.70507	73.4489	-0.0103549	0.333333	0.683864	0.40566	0.741887	-3.87819	0.0210888	-5.33208	39.1224	-0.0252237	0.330462	0.737881	0.387371	0.849411			0	0	0	0	0	0	0	0	0
	BANVT	0.0519231	4.10587	-0.00493223	12.5193	62.204	0.0248835	0.343061	0.648626	0.406305	0.700936	-0.0371469	0.00337281	3.79548	34.4081	0.0111049	0.346147	0.701553	0.388531	0.798192
	BFREN	-0.13399	16.0592	0.486825	-13.8669	55.3061	-0.0202654	0.319089	0.693775	0.356682	0.654479	0.22995	-0.433321	15.2779	27.8979	0.0588558	0.334153	0.653802	0.299297	0.567035		S2	-0.775	0.343	-0.729	0.889	-0.942	-0.855	0.942	0.741	0.96
	BLCYT	1.59036	58.3727	-0.114306	21.5119	24.9183	0.0731321	0.399133	0.600377	0.376438	0.582524	24.4908	0.0665354	27.1357	12.6326	0.153896	0.467865	0.558762	0.334823	0.491687			0	0.004	0	0	0	0	0	0	0
	BNTAS	-0.0618337	3.10908	0.00814121	-2.84759	77.4081	-0.00832691	0.332156	0.681836	0.410572	0.749413	-3.36757	-0.00280483	-4.03222	41.8775	-0.0205037	0.32987	0.733161	0.396204	0.85843
	BOSSA	0.401681	4.83663	-0.0361056	-1.30954	45.3469	0.0085844	0.344788	0.664925	0.401572	0.710887	-0.61354	0.0397727	-2.49773	23.1224	0.00247392	0.350985	0.710184	0.380021	0.795495		R2	-0.349	0.28	-0.241	0.827	-0.614	-0.687	0.614	1	0.864
	BRISA	0.364092	1.95231	-0.0381622	-8.08109	66.4693	-0.0136224	0.337705	0.687131	0.406592	0.747695	-2.73204	0.0471565	-6.47416	34.8775	-0.025407	0.339144	0.738065	0.389047	0.852707			0.003	0.019	0.044	0	0	0	0	0	0
	BRKO	0.297297	4.51942	-0.0156693	-3.04283	42.3877	0.0102447	0.346459	0.663264	0.39121	0.687889	-0.776422	0.027721	-2.27693	22.7347	0.0129614	0.354116	0.699696	0.361387	0.746469
	BRKSN	0.233184	-2.16258	0.0176953	-9.9067	86.306	-0.0244582	0.327204	0.697967	0.404441	0.756329	-5.81157	0.00270755	-7.53999	45.8979	-0.0376747	0.320183	0.750332	0.385179	0.863727		Q2	-0.64	0.379	-0.567	0.93	-0.869	-0.858	0.869	0.891	0.992
	BRSAN	0.0172662	2.38637	0.00416465	0.0425954	92.5305	-0.0079927	0.32987	0.681502	0.418962	0.766022	-3.30267	-0.00418204	-4.34677	48.1428	-0.0292812	0.325653	0.741939	0.411291	0.898546			0	0.001	0	0	0	0	0	0	0
	BTCIM	2.39066	53.4044	-0.281429	94.9651	23.9388	0.165039	0.423434	0.508471	0.397987	0.515991	28.8683	0.209982	46.351	13.2653	0.166545	0.47263	0.546113	0.373573	0.543073
	BUCIM	-0.210843	6.75211	-0.0161313	-5.22595	66.8979	-0.00933822	0.33713	0.682847	0.409568	0.748591	-1.83115	0.0176613	-4.31439	35.8571	-0.0153477	0.340217	0.728005	0.394399	0.847604
	BURCE	0.177926	3.51154	-0.0095646	-1.98239	45.1836	0.0120783	0.345624	0.661431	0.391246	0.685763	-1.10356	0.0222325	-1.94301	24.0612	0.0132845	0.352183	0.699373	0.361452	0.746111
	BURVA	-0.37495	-26.4459	0.75011	21.0094	65.9999	0.0734266	0.421667	0.600082	0.244898	0.315496	15.9915	-0.52834	34.8437	33.0816	0.192724	0.452323	0.519933	0.244898	0.272378
	CASA	0.103774	2.29465	-0.00442653	-2.14386	79.102	-0.00729703	0.332781	0.680806	0.412508	0.752103	-3.16501	0.00854026	-4.26398	42.4693	-0.0234337	0.330454	0.736091	0.399686	0.869014
	CCOLA	0.0566733	-0.823529	0.00662315	-6.02014	100.877	-0.0225122	0.326109	0.696021	0.414588	0.774566	-5.14178	0.00415346	-6.86268	53.3265	-0.0432728	0.318764	0.75593	0.403425	0.90488
	CELHA	-0.204396	8.08224	-0.0113802	16.3478	62.3265	0.0349356	0.347033	0.638573	0.409317	0.694987	2.68475	0.00174451	5.73504	34.4898	0.0212845	0.353102	0.691373	0.393947	0.79303
	CEMAS	-0.390698	8.61206	0.0233087	0.208962	90.3673	-0.00505829	0.331585	0.678567	0.417886	0.760322	-1.98103	-0.0286629	-2.18637	45.8979	-0.015238	0.331279	0.727896	0.409357	0.874445
	CEMTS	-0.0295597	-12.5923	0.0110955	-8.5387	96.1223	-0.0293562	0.321609	0.702865	0.408098	0.769617	-8.19987	0.0157642	-11.9849	50.9387	-0.058212	0.309265	0.77087	0.391755	0.905738
	CIMSA	0.140449	3.55922	-0.00229758	-1.16883	78.4693	-0.00565771	0.332998	0.679167	0.414373	0.753917	-2.74316	0.00331999	-3.87363	41.6326	-0.0213685	0.331294	0.734026	0.403039	0.872036
	CMBTN	0.0647555	10.3928	-0.053364	18.479	40.4489	0.0561035	0.360815	0.617406	0.399959	0.650629	6.56292	0.0414673	7.42444	21.0612	0.0478848	0.375322	0.664773	0.377119	0.723615
	CMENT	0.050885	3.20194	-0.00702219	2.68425	51.4897	0.0168032	0.343695	0.656706	0.397557	0.69289	-1.06158	0.0144631	-0.523894	27.6939	0.0109961	0.34796	0.701662	0.372799	0.769953
	CUSAN	-0.133247	-3.00413	0.0189955	-3.55149	96.4489	-0.0153387	0.326215	0.688848	0.411074	0.75884	-5.48237	-0.00552534	-5.70476	51.204	-0.0362583	0.317852	0.748916	0.397107	0.88318
	DAGI	-0.703841	0.268166	0.019527	-4.87073	101.592	-0.0199165	0.325705	0.693426	0.414731	0.771744	-5.01089	-0.0104566	-5.99904	53.6122	-0.0383834	0.318372	0.751041	0.403683	0.89817
	DERIM	0.179671	4.64403	-0.0209666	5.28922	52.6122	0.0168451	0.34334	0.656664	0.405552	0.709049	-0.37469	0.0205346	0.366239	27.7551	0.00589046	0.347636	0.706767	0.387178	0.8034
	DESA	0.26694	5.69838	-0.0422497	0.836738	34.0408	0.0269002	0.355121	0.646609	0.387804	0.66101	1.99171	0.0501026	0.32466	17.653	0.0304218	0.368114	0.682236	0.355262	0.709788
	DEVA	0.256007	0.921933	-0.00343835	-14.3155	61.7142	-0.019533	0.335706	0.693042	0.396445	0.734213	-3.85046	0.0242866	-8.57694	31.7959	-0.0224152	0.335862	0.735073	0.370801	0.815378
	DITAS	0.13891	20.6804	-0.0781403	3.88675	28.2857	0.0360899	0.362624	0.637419	0.39666	0.667943	6.73083	0.0647188	4.22518	14.3673	0.0464352	0.384658	0.666222	0.371187	0.715035
	DMSAS	0.0726172	0.259981	-0.000490871	-3.60229	87.5713	-0.0126604	0.330181	0.686169	0.412042	0.75759	-4.083	0.00899228	-5.37281	46.8163	-0.0312653	0.32546	0.743923	0.398848	0.878995
	DOBUR	-0.157754	-2.2868	0.23382	-1.35536	60.1224	0.0356149	0.328933	0.637894	0.375757	0.626135	-3.22856	-0.195471	4.16306	31.1224	0.0391823	0.318684	0.673475	0.333598	0.657825
	DOGUB	0.164384	37.3004	-0.0252441	66.9673	11.1633	0.159358	0.466435	0.514151	0.274539	0.272536	29.9848	0.0655922	40.4667	6.16326	0.263544	0.552156	0.449114	0.151583	0
	DOKTA	0.0248204	-9.26563	0.189743	-19.4007	91.4897	-0.0490928	0.29888	0.722602	0.406485	0.790015	-12.6751	-0.151837	-12.375	47.7551	-0.0612239	0.268141	0.773881	0.388854	0.904921
	DURDO	0.13918	6.22004	-0.0293468	8.78394	56.102	0.0205348	0.3446	0.652974	0.409425	0.712475	0.786188	0.0235332	1.96415	29.9592	0.00723007	0.349872	0.705428	0.394141	0.814004
	DYOBY	0.165493	-8.79667	-0.0108167	-21.0309	93.7142	-0.0474438	0.323668	0.720953	0.410321	0.795815	-7.34727	0.0361974	-14.7306	48.7142	-0.0699235	0.314477	0.782581	0.395753	0.930141
	EGEEN	-0.0858671	15.9006	-0.00591885	3.6137	37.4898	0.0370335	0.372535	0.636476	0.356073	0.584528	7.30006	0.0282019	20.6638	19.2245	0.0798397	0.404406	0.632818	0.298201	0.534261
	EGGUB	0.442837	2.4104	-0.0383966	-9.61513	52.5918	-0.00696456	0.34312	0.680474	0.396517	0.719285	-1.87318	0.0523375	-6.24209	27.0816	-0.0102127	0.348365	0.72287	0.37093	0.797703
	EGPRO	-0.14749	-5.08605	0.0339959	-7.74539	96.2244	-0.025577	0.322892	0.699086	0.407273	0.763413	-6.96127	-0.0128059	-7.23468	50.653	-0.043401	0.312123	0.756059	0.390272	0.881325
	EGSER	0.305151	0.86821	-0.00801436	-5.75239	71.7754	-0.0125344	0.333508	0.686044	0.406341	0.745882	-3.75819	0.0193565	-5.42778	38.4285	-0.0249832	0.331486	0.737641	0.388596	0.85127
	EKIZ	-0.0336606	-0.122248	-0.0203044	-10.359	85.3264	-0.0260717	0.330289	0.699581	0.412257	0.77411	-4.28183	0.0315537	-8.4282	44.8979	-0.0436134	0.326532	0.756271	0.399234	0.897815
	EMKEL	-0.567568	3.29896	0.0487284	4.12775	73.9591	0.00283368	0.330368	0.670675	0.409389	0.73363	-3.3874	-0.0437289	-0.281331	39.4898	-0.00871351	0.325853	0.721371	0.394076	0.837286
	EPLAS	0.171171	-15.8904	0.000759017	-23.6189	79.8366	-0.050693	0.323545	0.724202	0.399349	0.777469	-8.80354	0.0392314	-17.829	41.3673	-0.0711451	0.313372	0.783803	0.376023	0.89632
	ERBOS	0.556098	1.36097	-0.0201937	-3.37289	64.9999	-0.00379027	0.3373	0.677299	0.40523	0.733142	-2.71347	0.0289193	-4.36367	33.3673	-0.0163397	0.337583	0.728997	0.386597	0.834977
	EREGL	0.0221031	0.299823	0.00150241	-1.71435	92.5713	-0.00986593	0.329737	0.683375	0.414624	0.759473	-3.93248	0.00448451	-4.90873	49.3469	-0.0311491	0.324549	0.743807	0.40349	0.887204
	ERSU	-0.0303644	25.3341	0.0204746	57.883	31.3673	0.123599	0.439708	0.54991	0.285654	0.337953	23.0029	0.0301203	30.7798	17.7755	0.215084	0.51063	0.497573	0.17157	0.107197
	FMIZP	0.176991	44.4119	-0.728057	93.1401	43.9591	0.198141	0.531355	0.475368	0.294905	0.267313	40.5584	0.718016	38.0952	22.8571	0.242538	0.606067	0.47012	0.188205	0.0969354
	FORMT	-0.671579	-13.1024	0.135564	-9.00485	120.633	-0.0468004	0.30007	0.720309	0.419571	0.813797	-12.9237	-0.107405	-9.82307	60.9795	-0.0771583	0.270945	0.789816	0.412388	0.970787
	FRIGO	0.821735	8.09157	-0.113121	-16.2042	35.102	0.0118228	0.368239	0.661686	0.376438	0.656049	3.73717	0.128567	-1.75362	18	0.0276899	0.391761	0.684968	0.334823	0.676902
	FROTO	0.534127	2.46442	-0.158067	-10.8397	68.9795	-0.00713985	0.35558	0.680649	0.404907	0.736505	0.221804	0.161251	-9.19131	34.8979	-0.0230131	0.368008	0.735671	0.386017	0.843723
	GEDZA	0.337313	3.11046	-0.0145927	-7.43679	46.1632	0.00319115	0.346423	0.670318	0.386693	0.687189	-1.35967	0.033174	-3.27971	23.5714	0.00895845	0.354283	0.703699	0.353263	0.737678
	GENTS	-0.107744	-7.89965	0.0199484	-11.2631	99.6734	-0.0330441	0.322022	0.706553	0.408779	0.775421	-7.6635	0.00338293	-9.47402	53.2448	-0.0544166	0.310721	0.767074	0.39298	0.902379
	GEREL	0.0276873	1.56526	0.0124519	-0.0974854	68.7959	0.00269078	0.335261	0.670818	0.40376	0.722389	-3.08952	-0.00316745	-2.50078	36.0612	-0.00812948	0.333695	0.720787	0.383954	0.818156
	GOLTS	0.389966	4.09265	-0.0297404	-1.04186	56.5101	0.00324038	0.34049	0.670269	0.40756	0.729435	-1.3779	0.0315284	-2.97297	29.4489	-0.00814382	0.343626	0.720801	0.390788	0.830514
	GOODY	-0.0705742	-5.62761	0.00597918	-4.00456	97.2448	-0.0177877	0.325802	0.691297	0.412867	0.765411	-5.77804	0.0082569	-6.85915	51.7142	-0.0435344	0.316931	0.756192	0.400331	0.899677
	GUBRF	-0.150494	-21.6417	0.292554	-46.7521	93.102	-0.0785179	0.280683	0.752027	0.399063	0.810256
	HATEK	0.442294	4.35142	-0.0123314	-2.27876	65.5101	-0.00378372	0.33626	0.677293	0.410142	0.743093
	HEKTS	0.592029	6.98461	-0.0819418	-5.16404	36.8367	0.0248283	0.364541	0.648681	0.378446	0.644523
	HURGZ	-0.128571	3.79156	0.00692829	6.8259	62.7346	0.0162638	0.339914	0.657245	0.404513	0.707638
	IHEVA	-0.255319	-11.1666	0.016468	-4.64593	111.979	-0.0259389	0.319444	0.699448	0.416094	0.781728
	IHGZT	-0.551724	-16.2886	0.0547453	1.11641	115.143	-0.0255868	0.310495	0.699096	0.422619	0.794536
	ISDMR	0.189911	0.675741	-0.0060818	-2.89107	78.5305	-0.00832401	0.332655	0.681833	0.409998	0.748247
	JANTS	1.0473	35.4319	-0.363297	69.8888	28.7346	0.124039	0.464524	0.54947	0.316238	0.399429
	KAPLM	-0.0325444	-2.34136	0.0534014	-2.90681	78.9387	-0.00843056	0.327015	0.68194	0.400927	0.729984
	KARSN	0.206154	4.32748	-0.0247108	-0.389294	37.0204	0.0304689	0.358174	0.64304	0.376797	0.634414
	KARTN	-0.271481	-73.8752	0.158189	-33.2201	83.4489	-0.0682615	0.268175	0.741771	0.386298	0.772079
	KATMR	0.188312	5.1865	-0.0293335	3.19724	67.3469	0.00716228	0.339672	0.666347	0.414265	0.738325
	KENT	-0.0494938	-66.1101	0.424014	49.8822	72.0203	0.230075	0.588706	0.443434	0.18194	0
	KERVT	-0.153495	-8.65152	0.0266736	-21.1087	109.551	-0.0527918	0.317387	0.726301	0.411719	0.805064
	KLMSN	0.261049	0.760987	-0.0107238	-4.44663	92.9999	-0.0167798	0.329705	0.690289	0.416488	0.771544
	KNFRT	0.123669	2.16827	-0.0056796	-4.43084	56.4693	-0.000300449	0.33989	0.67381	0.396266	0.710785
	KONYA	-0.0353982	4.14667	0.0363637	56.0725	57.9591	0.111223	0.43313	0.562286	0.280061	0.341455
	KORDS	0.579421	3.33932	-0.0140782	-0.816077	76.8775	-0.00447149	0.334291	0.677981	0.415305	0.754385
	KRDMA	0.0420168	4.07776	0.00348484	5.56716	82.6326	0.00611989	0.33512	0.667389	0.414695	0.740447
	KRDMB	0.218216	4.94174	-0.00519657	5.79297	73.4285	0.00852324	0.337192	0.664986	0.414014	0.736184
	KRDMD	0.224913	5.0306	-0.00577772	5.87052	70.9999	0.00938198	0.337702	0.664127	0.413297	0.7337
	KRSTL	-0.288265	-11.7946	0.0304568	-2.40291	94.3469	-0.0172554	0.320685	0.690765	0.409353	0.757649
	KRTEK	1.16491	6.57274	-0.0719733	-3.36095	46.653	0.00675076	0.34916	0.666758	0.402684	0.71534
	KUTPO	0.0654113	2.1878	-0.00303513	-1.59995	49.4693	0.0225871	0.352036	0.650922	0.378267	0.646847
	LUKSK	1.72664	33.4849	-0.143822	33.3225	13.4286	0.0994722	0.416423	0.574037	0.340835	0.478755
	MAKTK	0.196481	1.62131	-0.0157257	31.6388	40.5101	0.0668028	0.384992	0.606706	0.33811	0.51241
	MNDRS	-0.0194175	2.27019	-0.00390749	0.444452	90.4489	-0.00824297	0.330046	0.681752	0.4214	0.771265
	MRSHL	-0.088686	-15.5168	0.280715	-26.2418	66.3469	-0.0177909	0.302849	0.6913	0.376295	0.691272
	NIBAS	-0.667115	-195.881	0.751394	-115.536	65.3061	-0.186853	0.152589	0.860362	0.355176	0.851206
	NUHCM	0.19212	0.193722	-0.0383755	-9.73765	50.2856	0.0141928	0.359348	0.659316	0.367761	0.635616
	OLMK	-0.383966	-7.20624	0.115904	5.34629	96.0203	-0.0109087	0.314029	0.684418	0.411899	0.755199
	OTKAR	0.139761	2.79124	-0.161435	-16.9351	55.0203	-0.0120201	0.361676	0.685529	0.39182	0.715826
	OYAKC	-0.186788	-2.71849	0.038914	-4.66449	82.5918	-0.0117089	0.328175	0.685218	0.400318	0.73268
	OYLUM	-0.123142	-1.04141	0.017837	-2.25656	91.0816	-0.0102787	0.328351	0.683788	0.410213	0.751027
	PARSN	0.364609	4.06632	-0.0171944	-2.5673	56.9387	-0.00115617	0.338455	0.674665	0.406377	0.732309
	PENGD	-0.19604	1.51274	0.0222609	0.184928	66.8775	0.00548799	0.336002	0.668021	0.399923	0.711257
	PETKM	0.154618	2.11726	-0.00153292	-2.24355	88.1632	-0.0100992	0.330927	0.683608	0.415341	0.761206
	PETUN	-0.111684	-3.21388	0.00479869	-4.99501	99.0203	-0.0200553	0.326184	0.693564	0.413763	0.769948
	PINSU	0.0565276	11.5044	-0.0450454	16.4661	40.7142	0.0433272	0.355095	0.630182	0.404584	0.675328
	PNSUT	-0.119584	0.335889	0.00463293	-1.26537	96.4489	-0.0108328	0.328567	0.684342	0.416882	0.765212
	PRKAB	-0.0504132	-7.03761	0.0201901	-4.08133	90.5305	-0.0152683	0.325825	0.688777	0.406556	0.749597
	PRZMA	-0.0164234	0.208816	0.00771108	-6.15338	83.9387	-0.0176799	0.329357	0.691189	0.408815	0.757068
	RTALB	0.0125495	-16.6278	0.0505892	-17.5172	80.2652	-0.0186892	0.334511	0.692198	0.367869	0.675268
	SAMAT	-0.331813	-12.7711	0.1096	-9.93414	81.2652	-0.0200735	0.32029	0.693583	0.382892	0.707384
	SANFM	0.213235	1.26222	-0.0194674	-6.68767	63.1836	-0.00992152	0.337047	0.683431	0.402469	0.734898
	SARKY	0.494344	-3.71072	-0.0270276	-8.53251	89.3468	-0.0239391	0.329874	0.697448	0.412257	0.771552
	SASA	0.653808	13.4586	-0.111676	-0.113617	31.204	0.0298772	0.36484	0.643632	0.392322	0.666598
	SAYAS	2.41246	32.5	-0.279836	17.7408	38.2857	0.045791	0.394569	0.627718	0.394868	0.652675
	SEKUR	1.24212	8.87844	-0.068071	4.29755	33.204	0.0283756	0.355142	0.645133	0.399134	0.68221
	SELGD	-0.0923695	4.44582	0.0110794	-0.676145	58.1428	0.0052175	0.338211	0.668292	0.401465	0.714707
	SILVR	-0.283721	-11.3485	0.0778656	-9.9271	115.939	-0.042525	0.310062	0.716034	0.413799	0.796967
	SKTAS	-0.145383	7.34138	-0.00542045	14.2406	81.4489	0.0211398	0.34032	0.652369	0.41785	0.728831
	SNPAM	-0.0958333	-0.288924	0.0870438	26.5859	59.5714	0.0523853	0.364537	0.621124	0.343488	0.540603
	TATGD	-0.203204	-1.43033	0.0229327	-5.62375	96.0203	-0.0201487	0.325589	0.693658	0.41007	0.762573
	TBORG	0.0226895	1.5138	0.0103379	-10.5635	62.4285	-0.0131032	0.336112	0.686612	0.394366	0.722286
	TIRE	-0.157895	-3.51778	0.050715	-3.87003	99.9591	-0.0202306	0.320897	0.69374	0.412042	0.766669
	TMPOL	0.530435	3.6806	-0.0496158	-5.66249	51.653	-0.00219758	0.343767	0.675707	0.402039	0.724763
	TMSN	0.741294	9.33431	-0.0419869	-0.256267	32.1224	0.0210621	0.352838	0.652447	0.393218	0.678987
	TOASO	-0.0241745	-1.60609	-0.0293893	-10.6878	86.1019	-0.0260013	0.33079	0.69951	0.41154	0.772572
	TTRAK	0.131363	4.58689	-0.158368	-2.49463	68.2856	0.00620263	0.357699	0.667306	0.407022	0.724792
	TUCLK	-0.0420792	2.38894	0.0151178	1.88557	89.4285	-0.00205881	0.33107	0.675568	0.414444	0.749747
	TUKAS	-0.181631	-2.03136	0.0384025	-10.3088	79.204	-0.0191449	0.329133	0.692654	0.395083	0.730985
	TUPRS	-0.166667	2.90619	0.00568753	8.54183	91.9183	0.00809338	0.334366	0.665416	0.416201	0.741133
	ULKER	-0.0898876	-0.72483	0.00901788	-7.5988	108.959	-0.0336989	0.320923	0.707208	0.425487	0.810079
	ULUUN	-0.42	-10.1536	0.0412863	-5.29801	115.796	-0.0289896	0.316585	0.702499	0.415556	0.784297
	USAK	0.034188	2.47321	-0.000467801	-0.990465	79.4081	-0.00467313	0.332964	0.678182	0.412436	0.748811
	VESBE	0.501957	-2.23046	-0.0208413	-17.3245	80.5713	-0.0341308	0.329715	0.70764	0.407453	0.774034
	VESTL	0.780627	-0.499448	-0.017354	-12.0613	89.9999	-0.0299293	0.3288	0.703438	0.412903	0.780045
	YATAS	0.0193772	-3.62657	0.0140226	-12.4739	95.1632	-0.0322961	0.324461	0.705805	0.408636	0.774233
	YUNSA	0.0150068	0.676159	-0.0603855	-7.60523	59.9183	-0.00341493	0.34499	0.676924	0.3977	0.717427

## Sheet: 2020 12
		2020/12	CODAS	COPRAS	ELC3	FUCA	MABAC	TOPSIS	S	R	Q	CODAS2	COPRAS2	ELC2	FUCA2	MABAC2	TOPSIS2	S2	R2	Q2			CODAS	COPRAS	ELC3	FUCA	MABAC	TOPSIS	S	R	Q
	ACSEL	-0.206673	-20.351	-0.00492328	-14.902	117	-0.0472647	0.546488	0.550681	0.176317	0.371505	-37.4701	-0.0270088	-14.398	58.204	-0.116363	0.638889	0.480765	0.163265	0.374813
	ADEL	0.663265	10.4216	0.0202438	-0.498618	46.7958	0.00474569	0.597158	0.49867	0.155073	0.292726	26.6199	0.0333716	-5.41109	22.3265	0.0127551	0.754976	0.351647	0.141469	0.231773		CODAS2	0.875	0.294	0.643	-0.97	0.755	0.956	-0.755	-0.943	-0.934
	AEFES	0.12089	2.8202	-0.000767467	-0.98224	71.6938	-0.00189194	0.589808	0.505308	0.154071	0.296281	19.6789	0.00051438	-2.0724	35.8163	-0.00398176	0.733371	0.368384	0.125689	0.22456			0	0.014	0	0	0	0	0	0	0
	AFYON	0.202353	1.25182	0.00881103	-0.742144	79.4693	-0.00229364	0.584517	0.50571	0.159701	0.306458	9.79081	0.0138454	-0.0110882	38.7959	0.00399913	0.736373	0.360403	0.119528	0.209055
	AKCNS	0.215283	1.97548	0.00405249	-0.800856	77.2448	-0.00136693	0.58713	0.504783	0.157161	0.30127	14.3881	0.00729898	-0.137667	39.4081	0.00260639	0.735521	0.361796	0.121591	0.213128		COPRAS2	0.664	0.934	0.381	-0.576	0.47	0.568	-0.47	-0.312	-0.442
	AKSA	1.04628	7.13903	0.0100741	0.84259	29.9592	0.0169642	0.599411	0.486452	0.152835	0.279039	26.9894	0.0201367	5.52256	13.2653	0.0506802	0.761444	0.313722	0.113012	0.159229			0	0	0.001	0	0	0	0	0.009	0
	ALCAR	1.61203	31.5239	0.0454045	6.86667	21.2653	0.054425	0.632056	0.448991	0.147211	0.239237	66.005	0.0876669	27.9078	9.99998	0.150821	0.840594	0.213581	0.118627	0.0794634
	ALKA	-0.0216606	-1.79798	0.00122489	-1.26847	104.755	-0.00757508	0.580238	0.510991	0.160937	0.312845	6.00497	0.00139794	-0.807302	51.8571	-0.0100292	0.724536	0.374431	0.127997	0.233041		ELC2	0.539	0.212	0.877	-0.575	0.882	0.622	-0.882	-0.407	-0.684
	ALKIM	0.0520984	-2.05063	0.00174286	-0.70914	87.8775	-0.000260983	0.581951	0.503677	0.16183	0.308558	6.776	0.00424868	2.29353	42.8979	0.014425	0.733226	0.349977	0.130056	0.214514			0	0.079	0	0	0	0	0	0	0
	ALMAD	0.0841584	-153.264	0.204787	-88.8142	116.816	-0.281002	0.266686	0.784418	0.428571	1	-508.463	0.203578	-65.4531	58.9795	-0.411425	0.20615	0.775828	0.428571	1
	ARCLK	0.225806	2.31798	0.00238415	-0.434639	68.8775	0.00330513	0.58957	0.500111	0.156268	0.295971	16.9702	0.00555097	1.9767	35.1632	0.0148677	0.738933	0.349534	0.123421	0.204943		FUCA2	-0.913	-0.418	-0.701	0.998	-0.809	-0.965	0.809	0.882	0.929
	ARSAN	0.133748	2.20786	0.0012359	-0.36209	65.4897	0.00505323	0.59039	0.498363	0.156062	0.294213	17.937	0.00486943	2.30575	32.3469	0.0205803	0.741638	0.343822	0.125137	0.202325			0	0	0	0	0	0	0	0	0
	ASUZU	0.187335	1.56891	0.0043264	-0.308803	73.3265	0.00359975	0.587927	0.499816	0.157985	0.29874	13.8804	0.0080075	2.74716	37.0612	0.0182594	0.738835	0.346143	0.122964	0.201345
	ATEKS	0.4855	5.16425	0.00215566	0.17583	36.7143	0.0117764	0.597	0.49164	0.152492	0.282586	26.1	0.00801215	3.43177	17.8775	0.0350775	0.751516	0.329325	0.121362	0.184427		MABAC2	0.685	0.316	0.958	-0.719	0.976	0.76	-0.976	-0.538	-0.81
	AVOD	0.131579	0.867722	0.00907862	-0.154317	77.2244	0.00333032	0.585394	0.500086	0.160594	0.303523	9.35126	0.0143697	3.49714	37.6326	0.0213922	0.739486	0.34301	0.11999	0.19449			0	0.008	0	0	0	0	0	0	0
	AYGAZ	0.295314	2.1446	0.00353368	-0.651667	69.8979	0.00115161	0.588439	0.502264	0.156818	0.298655	15.8352	0.00760244	0.597088	34.0408	0.0102876	0.739342	0.354114	0.122506	0.20768
	BAGFS	0.182033	3.49207	0.00125537	4.4612	61.3265	0.0197115	0.596866	0.483705	0.154689	0.280087	23.0941	0.00572242	10.9839	31.2653	0.0599057	0.749244	0.304496	0.125709	0.16874		TOPSIS2	0.939	0.572	0.733	-0.897	0.851	0.923	-0.851	-0.691	-0.843
	BAKAB	0.408647	3.79617	0.00804268	-0.250266	55.3061	0.00494214	0.591497	0.498474	0.155788	0.293821	18.9215	0.0148578	1.44383	27.3877	0.0197392	0.746584	0.344663	0.116558	0.191185			0	0	0	0	0	0	0	0	0
	BANVT	1.06349	10.8423	0.0252701	-2.37961	43.3877	0.00185359	0.595824	0.501562	0.160734	0.30495	25.074	0.0411529	-6.02196	20.5918	0.00663469	0.755448	0.357767	0.157918	0.259893
	BFREN	0.413624	26.7494	0.121348	21.1148	75.4897	0.0303872	0.595196	0.473029	0.170618	0.299435	6.71122	0.18175	20.6724	37.5918	0.116996	0.799095	0.247406	0.110606	0.0979287		S2	-0.685	-0.316	-0.958	0.719	-0.976	-0.76	0.976	0.538	0.81
	BLCYT	0.211679	2.89834	0.00264729	-0.44301	64.7346	0.00337906	0.590719	0.500037	0.155307	0.294229	18.8621	0.00608706	1.61087	33.7347	0.0135397	0.739831	0.350862	0.122049	0.204204			0	0.008	0	0	0	0	0	0	0
	BNTAS	0.166667	1.86404	0.000842867	-1.16531	74.0816	-0.0031154	0.587339	0.506531	0.1562	0.300985	16.1673	0.00352478	-3.80068	37.1836	-0.00282285	0.734656	0.367225	0.130658	0.230426
	BOSSA	0.519149	4.29007	0.0064852	4.49458	43.551	0.0222697	0.597945	0.481146	0.155239	0.279003	23.1161	0.0143929	11.434	23.0204	0.0691689	0.757532	0.295233	0.120676	0.153676		R2	-0.715	-0.486	-0.658	0.752	-0.673	-0.764	0.673	0.639	0.745
	BRISA	0.597756	6.21381	0.0123299	0.81722	37.1224	0.0153617	0.597094	0.488054	0.154552	0.283325	23.3766	0.0225343	5.72815	17.4286	0.0481667	0.759296	0.316235	0.111754	0.159684			0	0	0	0	0	0	0	0	0
	BRKO	0.14433	-8.66369	0.00710879	-2.13266	114.082	-0.0205517	0.566976	0.523968	0.169176	0.337644	-11.5046	0.00683546	-6.60378	56.4285	-0.0353382	0.709768	0.39974	0.134814	0.264602
	BRKSN	0.514431	5.46497	0.0139999	0.284386	45.9795	0.0104727	0.594207	0.492943	0.155856	0.289518	20.4916	0.0250008	3.0805	21.6122	0.0368988	0.757592	0.327503	0.11061	0.167951		Q2	-0.765	-0.427	-0.842	0.823	-0.876	-0.86	0.876	0.681	0.867
	BRSAN	0.804023	5.81604	0.00117006	-0.431323	48.9387	0.00484229	0.595875	0.498574	0.15105	0.285607	26.6844	0.00522021	-0.181733	23.8163	0.0116023	0.743752	0.3528	0.121504	0.205144			0	0	0	0	0	0	0	0	0
	BTCIM	0.210797	4.28358	0.00219163	0.150304	52.9795	0.00972378	0.594858	0.493692	0.153522	0.286031	23.1563	0.00611093	4.1948	25.8775	0.0288472	0.744779	0.335555	0.121591	0.19019
	BUCIM	-0.225505	-1.17893	-0.00155021	-1.08068	93.7754	-0.00396412	0.5829	0.50738	0.159427	0.307313	9.20325	-0.00171891	0.50393	45.551	-0.00150633	0.727431	0.365908	0.130399	0.228915
	BURCE	-0.0304428	-1.03734	0.00232935	-1.63908	107.143	-0.0109658	0.579983	0.514382	0.160251	0.314354	6.28442	0.00251082	-5.10011	51.7346	-0.0213044	0.722301	0.385707	0.132141	0.248633
	BURVA	-0.178495	-40.4378	-0.0320067	-2.30775	112.245	-0.0499546	0.522829	0.553371	0.192452	0.401902	-57.5093	-0.0500546	-19.7219	55.7959	-0.074805	0.637459	0.439207	0.198343	0.387044
	CASA	2.21212	14.9258	0.0637585	10.1399	57.5714	0.0442021	0.601694	0.459214	0.165057	0.278653	18.319	0.103964	36.9153	27.2857	0.15398	0.824635	0.210422	0.0673727	0.00575149
	CCOLA	0.453348	5.0185	0.00600037	-0.643862	51.8979	0.00146823	0.592514	0.501948	0.153522	0.292632	21.9631	0.0116134	-2.74887	24.551	0.0057523	0.74275	0.35865	0.128944	0.220556
	CELHA	-0.261364	-9.3831	-0.0369795	17.601	92.8163	0.0147071	0.582757	0.488709	0.160045	0.293464	10.2578	-0.0529471	5.93587	45.1836	0.0526775	0.698649	0.311725	0.176725	0.245679
	CEMAS	0.25	-0.801391	0.000607268	-5.61649	103.265	-0.0221997	0.577061	0.525616	0.162575	0.327406	5.15806	-0.00183305	-12.7617	51.1632	-0.0566928	0.709805	0.421095	0.163265	0.322653
	CEMTS	0.0728745	-0.0784103	0.00703349	-0.116937	82.3469	0.00879477	0.587023	0.494621	0.161212	0.300235	11.9148	0.0171351	12.1049	40.7143	0.0446572	0.751504	0.319745	0.125823	0.182228
	CIMSA	0.210884	2.4923	0.00105517	-0.874272	73.9795	-0.00148099	0.58884	0.504897	0.155239	0.297995	17.7977	0.00285146	-0.640857	37.8571	-0.0011769	0.733742	0.365579	0.122964	0.218335
	CMBTN	1.3701	32.9252	0.0875548	13.0467	23.2653	0.0438882	0.617947	0.459528	0.151737	0.255586	41.2298	0.138984	20.2071	10.1428	0.129346	0.828692	0.235056	0.111217	0.0879778
	CMENT	0.0610329	-0.975845	0.004294	-0.673082	88.4489	-0.00138296	0.582463	0.504799	0.161212	0.308374	7.14641	0.00681421	1.86851	43.551	0.00876697	0.732077	0.355635	0.125709	0.213443
	CUSAN	0.32363	2.15525	0.00543413	-0.567981	71.8775	0.0010864	0.587863	0.50233	0.157436	0.299789	14.5382	0.00968762	1.08319	35.8571	0.0103474	0.738706	0.354055	0.120676	0.205095
	DAGI	-0.271661	-25.5493	-0.00509232	-4.66385	129.592	-0.0482277	0.539907	0.551644	0.182428	0.382973	-44.1038	-0.0195871	-15.7554	64.102	-0.09891	0.659497	0.463312	0.151331	0.343037
	DERIM	0.1513	2.05905	0.00590281	-1.87868	82.6734	-0.00871265	0.584705	0.512129	0.157223	0.307252	12.8608	0.00910492	-8.34484	40.9795	-0.0188264	0.729678	0.383229	0.143097	0.261633
	DESA	0.477997	6.46196	0.0148202	-0.0916532	50.204	0.00560056	0.593831	0.497815	0.154621	0.291251	21.4653	0.0250952	-0.176325	24.2245	0.0198004	0.752279	0.344602	0.123829	0.201196
	DEVA	0.281997	2.41403	0.00489924	-0.401583	66.4081	0.00306691	0.589098	0.500349	0.156886	0.297243	15.9075	0.00912205	1.90948	33.4081	0.0151462	0.740117	0.349256	0.121019	0.201375
	DITAS	-0.579134	-31.656	-0.0616592	-10.4268	112.245	-0.0384955	0.545438	0.541911	0.172815	0.358363	-28.3253	-0.100488	-13.3095	55.7346	-0.0860692	0.635075	0.450471	0.210697	0.413991
	DMSAS	0.0425868	0.399018	0.000373992	-0.30474	83.2856	0.00400353	0.586991	0.499412	0.158466	0.299259	12.8419	0.00214315	3.83235	40.6122	0.0201861	0.735589	0.344216	0.12834	0.207103
	DOBUR	0.181053	11.104	0.070761	-0.85299	80.8366	0.00379252	0.584127	0.499623	0.168421	0.316855	1.62396	0.107102	8.2677	38.5306	0.0389116	0.772156	0.32549	0.156726	0.230029
	DOGUB	0.164894	-28.1565	0.0444008	-8.43094	107.224	-0.0520989	0.520404	0.555515	0.203094	0.422246	-78.2869	0.048347	-19.7952	52.6326	-0.0788214	0.657136	0.443223	0.129641	0.295452
	DOKTA	-0.0490683	-31.2405	-0.0915382	-2.84146	103.265	-0.0136748	0.555666	0.517091	0.166636	0.327698	-11.2217	-0.138569	2.0578	51.0816	-0.0208956	0.63028	0.385298	0.244898	0.404364
	DURDO	-0.558502	-8.44936	-0.0252197	8.65192	94.2856	0.00691527	0.580531	0.496501	0.161418	0.302099	6.84466	-0.0365384	1.55644	46.7755	0.032352	0.707552	0.33205	0.16277	0.244129
	DYOBY	0.30126	2.46605	0.00433321	0.425868	60.1428	0.0112368	0.591975	0.492179	0.156886	0.29071	17.837	0.00989767	6.27324	29.8367	0.0398139	0.747767	0.324588	0.123307	0.182978
	EGEEN	1.37204	37.215	0.024624	6.60233	17.8571	0.0647399	0.647881	0.438676	0.14498	0.227084	90.2872	0.0608252	27.8663	8.59182	0.16056	0.839202	0.203843	0.112147	0.0619797
	EGGUB	0.126455	1.20813	0.00405594	-0.715365	80.8979	-0.000730615	0.586012	0.504147	0.158328	0.302804	12.2437	0.0071294	0.906506	39.6122	0.00624587	0.735099	0.358156	0.122964	0.211847
	EGPRO	0.662609	4.57824	0.00735433	0.700059	37.8571	0.0154422	0.596176	0.487974	0.154964	0.283982	22.6238	0.0159309	6.35135	18.6326	0.0499966	0.757259	0.314405	0.118503	0.167427
	EGSER	0.540419	3.75341	0.0056873	0.0754282	44.4081	0.00953368	0.593598	0.493882	0.15517	0.289067	20.8923	0.0124553	3.24516	22.2449	0.0326963	0.750308	0.331706	0.119647	0.184133
	EKIZ	-0.237433	-12.2152	-0.0293739	18.6376	99.8163	0.0130512	0.575614	0.490365	0.166155	0.305485	-0.358431	-0.0433095	12.1435	48.7755	0.0570759	0.69491	0.307326	0.173865	0.237875
	EMKEL	0.667606	5.71371	0.0104882	-0.300306	55.0816	0.00365906	0.593105	0.499757	0.15414	0.291962	21.5002	0.0181223	-0.562613	26.7755	0.0128277	0.746763	0.351574	0.123771	0.207211
	EPLAS	0.725389	6.17614	0.00926911	1.22159	31	0.0192464	0.599145	0.48417	0.153728	0.278777	25.8582	0.0192407	8.1362	14.0612	0.0589684	0.762333	0.305434	0.115414	0.155309
	ERBOS	0.372155	1.26215	0.00237158	-0.615238	75.9999	0.00133432	0.587216	0.502082	0.157779	0.300191	13.9692	0.00546886	1.53798	38.3469	0.0119998	0.737244	0.352402	0.124908	0.209509
	EREGL	0.578224	6.07337	0.00220024	-0.0735611	37.4489	0.00986422	0.597759	0.493552	0.151256	0.281952	28.1242	0.00847737	1.80812	17.7143	0.0280372	0.751736	0.336365	0.119761	0.188364
	ERSU	-0.0885609	-37.9718	0.030785	-16.4488	128.877	-0.0686933	0.505643	0.572109	0.208861	0.445612	-94.797	0.0226497	-32.6298	64.4081	-0.121515	0.621788	0.485917	0.132343	0.336512
	FMIZP	-0.0134921	-101.385	0.0140907	-69.9434	120.469	-0.14757	0.388087	0.650986	0.276147	0.626474	-233.506	-0.0245733	-46.9184	59.6938	-0.248336	0.439053	0.612738	0.212641	0.558529
	FORMT	0.17866	1.11884	0.013139	-0.186109	74.3877	0.00226945	0.584565	0.501147	0.161487	0.305934	8.06721	0.0203871	2.59149	36.7551	0.0200771	0.74177	0.344325	0.115986	0.190097
	FRIGO	-0.0854403	-12.0625	-0.0197664	-2.2854	108.082	-0.0176784	0.568709	0.521094	0.164576	0.327294	-6.7384	-0.0368176	-8.8066	52.1632	-0.0404535	0.681785	0.404856	0.153848	0.295421
	FROTO	0.44	1.37216	0.00191396	0.00107771	68.1428	0.00914252	0.590119	0.494273	0.15771	0.293827	16.2529	0.00683322	4.90931	33.2653	0.036056	0.745708	0.328346	0.127082	0.191489
	GEDZA	0.52968	5.90767	0.00922662	0.301221	36.8163	0.0119777	0.596505	0.491438	0.153797	0.284709	24.3026	0.0185413	3.2301	16.7755	0.0381021	0.756957	0.3263	0.114385	0.172124
	GENTS	0.953947	8.63849	0.0125805	0.827499	25.0204	0.0192437	0.601665	0.484172	0.15208	0.275894	30.1455	0.0260721	6.09824	10.3469	0.0583807	0.770479	0.306021	0.110153	0.148539
	GEREL	-0.119082	-2.20289	0.00435501	-1.23034	107.796	-0.00878672	0.578403	0.512203	0.162448	0.316458	2.83381	0.00504457	-0.547716	53.4489	-0.0118688	0.723031	0.376271	0.12548	0.231165
	GOLTS	0.681337	4.99855	0.00741961	-0.31014	55.204	0.00412857	0.592906	0.499287	0.15414	0.291587	21.4227	0.0136075	0.557335	27.1224	0.0141387	0.745089	0.350263	0.118685	0.199025
	GOODY	0.548148	3.4955	0.00761132	-0.278508	56.4081	0.00509674	0.591327	0.498319	0.155994	0.294058	18.5847	0.0146248	1.39327	27.3469	0.021021	0.747292	0.343381	0.117473	0.191331
	GUBRF	1.67902	34.8293	0.0661907	3.64113	29.5306	0.0383991	0.625739	0.465017	0.163265	0.280156
	HATEK	0.104513	2.17317	0.000760144	-0.620203	70.4081	0.00179029	0.589247	0.501626	0.155925	0.296581
	HEKTS	0.528045	8.10969	0.0154612	0.466639	38.4897	0.0117845	0.597532	0.491632	0.153316	0.284022
	HURGZ	-0.0540541	-6.18974	0.00263405	-2.57861	121.837	-0.0215008	0.570697	0.524917	0.165125	0.331312
	IHEVA	-0.160714	-3.10798	0.00116969	-1.32076	110.143	-0.00943356	0.577672	0.51285	0.162448	0.316975
	IHGZT	-0.412446	-36.9188	0.00805028	-7.96653	127.775	-0.0670889	0.514238	0.570505	0.199455	0.427863
	ISDMR	0.40612	5.01622	0.00278525	-0.0644877	39.1632	0.0103118	0.596293	0.493104	0.152835	0.284359
	JANTS	0.548553	14.2317	0.0300887	4.17883	25.653	0.0344486	0.608635	0.468967	0.153247	0.265779
	KAPLM	1.1033	25.4	0.0597175	3.12219	24.653	0.0340671	0.613672	0.469349	0.150295	0.260916
	KARSN	0.0450161	-0.679494	0.000449027	-1.2075	95.7142	-0.00600329	0.582533	0.509419	0.159358	0.308823
	KARTN	-0.865271	66.7464	0.0852505	38.4614	14.0816	0.153634	0.692399	0.349782	0.14479	0.155667
	KATMR	0.344978	16.9583	0.00503997	8.1248	28.2653	0.0389161	0.617666	0.4645	0.142949	0.244178
	KENT	0.064352	-68.2995	0.0878158	-59.0168	105.918	-0.114059	0.430415	0.617475	0.265093	0.580326
	KERVT	0.100334	0.143602	-0.00390298	5.35778	76.5714	0.0162466	0.591085	0.487169	0.158054	0.288747
	KLMSN	0.133601	1.75137	0.00168801	-0.0832498	75.6734	0.00645302	0.58975	0.496963	0.156955	0.294656
	KNFRT	-0.117032	-4.98404	-0.00122422	-1.78187	117.653	-0.0145354	0.574885	0.517951	0.163066	0.322136
	KONYA	0.971389	49.0097	0.0631045	28.7475	22.7755	0.0916026	0.66044	0.411813	0.150121	0.214603
	KORDS	0.341674	3.66842	0.00125432	-0.691428	60.3673	0.00124232	0.5916	0.502174	0.153728	0.293174
	KRDMA	-0.00833333	0.63559	0.000478261	-0.140143	84.8775	0.00511126	0.587593	0.498305	0.15826	0.298012
	KRDMB	0.347826	2.99378	0.00366285	0.260084	56.1428	0.0100053	0.592632	0.493411	0.155788	0.289772
	KRDMD	0.705015	4.55679	0.00592605	0.520802	42	0.0129675	0.595572	0.490448	0.154415	0.284999
	KRSTL	0.75	6.98685	0.00979325	0.151572	39.3673	0.0141111	0.599127	0.489305	0.152629	0.28096
	KRTEK	0.492147	-0.619649	-0.00792616	-2.15157	96.8162	-0.0116268	0.582714	0.515043	0.156543	0.308392
	KUTPO	0.707854	12.8272	0.0196855	1.18907	27.2857	0.0244291	0.60646	0.478987	0.150501	0.268983
	LUKSK	-0.0136519	-3.43557	-0.000842988	-0.392712	93.2856	0.000536398	0.580827	0.50288	0.162516	0.309123
	MAKTK	0.451064	7.52593	0.0149837	0.167414	39.6122	0.011816	0.597516	0.4916	0.153659	0.284598
	MNDRS	-0.031348	-90.1162	-0.426319	52.3916	94.1836	-0.032154	0.493773	0.53557	0.244898	0.479478
	MRSHL	-0.259894	-49.5275	-0.0848969	-26.0147	117.939	-0.0712057	0.517892	0.574622	0.183595	0.40339
	NIBAS	1.08668	185.769	0.0981782	133.447	23.0408	0.344272	0.81938	0.159144	0.159144	0.0283509
	NUHCM	1.35598	19.1254	0.0152938	1.77783	25.7142	0.0329681	0.617874	0.470448	0.147541	0.256973
	OLMK	0.335964	4.99557	0.0190081	0.201739	61.7346	0.00729971	0.591065	0.496116	0.158054	0.295902
	OTKAR	1.3106	17.2208	0.0281738	2.90997	15.9796	0.0334477	0.611028	0.469968	0.149677	0.260329
	OYAKC	0.108586	-2.13174	0.00640263	-0.73761	96.4489	-0.00371598	0.579479	0.507132	0.163272	0.313845
	OYLUM	-0.058	-1.62842	0.000437734	-1.43685	108.551	-0.00934134	0.580037	0.512757	0.160457	0.313416
	PARSN	0.0916442	3.03462	-0.000765329	-0.324601	62.653	0.00540931	0.592397	0.498007	0.154071	0.290442
	PENGD	0.0609244	-1.96867	0.00614848	-0.939844	92.1632	-0.00459717	0.57981	0.508013	0.16286	0.313829
	PETKM	0.185714	2.10251	-0.000620922	-0.694273	73.8775	0.00115317	0.589222	0.502263	0.155582	0.29649
	PETUN	-0.113818	-1.27122	-0.000625554	-1.31016	105.326	-0.00730795	0.581577	0.510724	0.159633	0.310347
	PINSU	-0.0815822	-23.1242	-0.0719842	-3.46586	102.939	-0.0150146	0.564938	0.518431	0.161967	0.320596
	PNSUT	0.0705009	1.4337	0.000445736	-1.22815	85.8979	-0.00512338	0.585975	0.508539	0.156612	0.303312
	PRKAB	0.20398	2.63255	0.0123553	-0.468226	71.306	0.000802159	0.587234	0.502614	0.15874	0.3023
	PRZMA	0.22049	3.68321	0.00323566	0.809994	44.6939	0.0187414	0.597252	0.484675	0.154827	0.281103
	RTALB	-0.359018	-68.038	-0.0141943	-59.3823	121.163	-0.119388	0.461157	0.622804	0.224928	0.514274
	SAMAT	1.24872	23.5539	0.0472031	2.96268	16.6122	0.0383479	0.615947	0.465068	0.148853	0.254968
	SANFM	0.547213	5.83143	0.0134674	2.7346	43.4489	0.0208087	0.597784	0.482607	0.155651	0.280893
	SARKY	0.315476	2.82027	0.00625886	0.0354793	56.8163	0.00799147	0.591161	0.495425	0.156818	0.293185
	SASA	0.211504	0.8467	0.0076333	0.0797396	75.0407	0.00579005	0.586467	0.497626	0.160251	0.300955
	SAYAS	0.401977	-3.54262	-0.0209479	20.1318	92.6326	0.0245467	0.589142	0.478869	0.158946	0.283673
	SEKUR	0.132198	2.12823	0.00353233	-1.02268	78.8162	-0.0034647	0.586947	0.506881	0.156612	0.301986
	SELGD	0.0204918	-34.0139	0.0469496	-18.6827	100.326	-0.0446586	0.510846	0.548075	0.212844	0.433364
	SILVR	1.04762	12.5666	0.0320125	3.97287	33.5306	0.0302276	0.603568	0.473188	0.155582	0.273241
	SKTAS	0.159453	2.92578	0.00239341	0.124305	63.7959	0.00868026	0.592335	0.494736	0.155445	0.290231
	SNPAM	0.656315	34.2808	0.0430415	22.8083	18.1428	0.0707385	0.641257	0.432677	0.14511	0.222515
	TATGD	0.0313043	1.73506	-0.00206051	-0.247408	75.4285	0.00569516	0.590333	0.497721	0.155788	0.293219
	TBORG	0.00724638	-2.06647	0.00277967	-1.15817	103	-0.0069969	0.579601	0.510413	0.16183	0.313945
	TIRE	0.1226	0.740521	0.0043376	-0.279897	84.0203	0.00306587	0.586257	0.50035	0.159221	0.301331
	TMPOL	0.265127	2.01572	0.00676385	-0.399415	70.4285	0.00244994	0.587864	0.500966	0.157985	0.29966
	TMSN	0.613532	5.49499	0.00428464	-0.00745329	37.9591	0.00937657	0.59623	0.494039	0.152629	0.284746
	TOASO	0.378862	2.4828	0.00466189	-0.30789	63.2448	0.00445884	0.589751	0.498957	0.156749	0.29589
	TTRAK	0.827	7.39529	0.0176917	2.37528	32.551	0.0240125	0.600154	0.479404	0.155239	0.27761
	TUCLK	0.0163522	0.756608	0.00119016	-0.877316	91.1428	-0.00218802	0.585493	0.505604	0.157985	0.303369
	TUKAS	-0.0212121	-12.2696	-0.0167574	-3.36867	118.918	-0.0254623	0.567474	0.528878	0.164576	0.333518
	TUPRS	0.356784	2.66087	0.00340168	-0.338724	68.8775	0.00402956	0.590229	0.499386	0.155994	0.294911
	ULKER	0.0122485	-0.349911	0.00215116	-0.947034	94.6122	-0.00353019	0.583271	0.506946	0.159633	0.307326
	ULUUN	0.100478	1.71743	0.00344423	-0.998559	74.653	-0.00230305	0.586864	0.505719	0.157161	0.302018
	USAK	0.337143	3.32846	0.00158828	-0.970603	68.9795	-0.00190052	0.590026	0.505316	0.15414	0.296408
	VESBE	0.457917	1.64365	0.00267407	-0.266861	69.7346	0.00498608	0.588985	0.49843	0.157367	0.29655
	VESTL	0.212435	0.882245	-0.000525793	-0.784526	83.3469	-0.00033306	0.586739	0.503749	0.157298	0.300683
	YATAS	0.623596	5.91177	0.0140527	0.722303	39.8571	0.0144648	0.596025	0.488951	0.155445	0.285605
	YUNSA	0.0397163	0.865115	0.00281085	-1.40702	94.653	-0.00763757	0.583585	0.511054	0.158191	0.308087

## Sheet: 2020 09
		2020/09	CODAS	COPRAS	ELC3	FUCA	MABAC	TOPSIS	S	R	Q	CODAS2	COPRAS2	ELC2	FUCA2	MABAC2	TOPSIS2	S2	R2	Q2			CODAS	COPRAS	ELC3	FUCA	MABAC	TOPSIS	S	R	Q
	ACSEL	1.29819	5.70118	0.0316239	2.93597	22.9183	0.0341226	0.342312	0.703298	0.269192	0.657192	18.0826	-0.0132992	12.9016	12.1632	0.127019	0.604948	0.409735	0.190718	0.374958
	ADEL	0.437151	-3.01895	0.00130268	-1.83691	76.9387	-0.00930726	0.307365	0.746728	0.284203	0.707146	-2.11399	0.00173276	-0.350635	39.1836	-0.00634252	0.532562	0.543096	0.200873	0.490667		CODAS2	0.974	0.781	0.98	-0.564	0.891	0.902	-0.891	-0.441	-0.774
	AEFES	0.051882	-0.713517	0.00864539	-1.32156	59.5918	-0.00195131	0.317883	0.739372	0.279972	0.696192	5.52242	-0.00514583	0.649504	32.7755	0.0066619	0.543075	0.530092	0.206156	0.488647			0	0	0	0	0	0	0	0	0
	AFYON	0.276276	-3.61802	-0.00265989	-1.79858	81.653	-0.010156	0.303101	0.747576	0.287981	0.713267	-2.83484	0.0153068	-0.0237563	42.1224	-0.00259886	0.525614	0.539353	0.202399	0.490093
	AKCNS	0.0534056	-2.92207	-0.00150617	-1.64423	97.7142	-0.0107687	0.305713	0.748189	0.286973	0.712172	-0.413261	0.0122838	0.161718	51.8571	-0.00873551	0.524463	0.545489	0.207447	0.502182		COPRAS2	-0.163	-0.471	0.07	0.508	-0.124	-0.306	0.124	0.838	0.463
	AKSA	-0.0219479	-1.99221	0.00153777	-1.43937	88.3673	-0.00736185	0.309957	0.744782	0.28521	0.707389	2.50773	0.00930381	0.427305	46.7959	-0.00313243	0.529681	0.539886	0.207741	0.498383			0.177	0	0.565	0	0.307	0.01	0.307	0	0
	ALCAR	0.904308	-0.744659	0.0096007	-1.253	35.1836	0.00397531	0.318371	0.733445	0.280576	0.693292	5.43956	0.000943386	0.880995	17.7959	0.0251198	0.550764	0.511634	0.197527	0.461966
	ALKA	0.214912	-1.77031	0.001428	-1.2932	78.8979	-0.00455885	0.310534	0.741979	0.286218	0.707083	3.8173	0.0154786	0.708165	41.2653	0.0035649	0.530616	0.533189	0.205745	0.490379		ELC2	0.841	0.626	0.915	-0.524	0.885	0.758	-0.885	-0.256	-0.633
	ALKIM	0.0375375	-2.92974	-0.00602372	-1.4175	109.041	-0.0115677	0.302742	0.748988	0.291356	0.719154	1.04903	0.0284714	0.512987	56.1836	-0.0125532	0.514797	0.549307	0.209326	0.507838			0	0	0	0	0	0	0	0.032	0
	ALMAD	0.518797	-41.8308	-0.188506	-58.9965	79.1836	-0.13386	0.165278	0.87128	0.428571	1	-61.2415	0.415323	-39.4988	39.7959	-0.235593	0.231161	0.772347	0.428571	1
	ARCLK	0.246231	-1.41601	0.00507361	-1.39737	70.3673	-0.00481532	0.313749	0.742236	0.28249	0.701743	3.70992	0.00134739	0.512607	38.551	0.000937446	0.536635	0.535816	0.206156	0.49297		FUCA2	-0.651	-0.83	-0.472	0.996	-0.758	-0.751	0.758	0.821	0.851
	ARSAN	0.291165	-0.444698	0.00990146	-1.25986	45.8979	7.43781e-05	0.319306	0.737346	0.279417	0.694077	6.29102	-0.00533649	0.756459	24.7347	0.012707	0.546135	0.524047	0.20551	0.483128			0	0	0	0	0	0	0	0	0
	ASUZU	0.0661041	-3.72794	-0.00189845	-1.98616	102.979	-0.0145459	0.303433	0.751966	0.285815	0.712878	-4.28275	0.00352916	-0.816624	52.9591	-0.0167379	0.524451	0.553492	0.205569	0.505451
	ATEKS	0.607519	-1.20781	0.0105012	-1.70586	54.1224	-0.00407127	0.317809	0.741492	0.277151	0.693383	2.28036	-0.0185741	-0.250993	28.102	0.00472179	0.548037	0.532032	0.203984	0.486905		MABAC2	0.893	0.849	0.824	-0.801	0.987	0.897	-0.987	-0.549	-0.861
	AVOD	0.814324	-2.42191	0.0101309	-2.69428	40.102	0.00112452	0.315532	0.736296	0.277654	0.690802	-3.00732	-0.0173679	-4.53736	19.7143	0.0153978	0.559617	0.521356	0.179917	0.443307			0	0	0	0	0	0	0	0	0
	AYGAZ	-0.0575	-2.64415	0.00126276	-1.64844	87.3673	-0.00963539	0.308422	0.747056	0.284606	0.707951	0.133289	0.00452789	0.181063	46.653	-0.00648433	0.529634	0.543238	0.20733	0.500308
	BAGFS	-0.0174216	-9.09252	-0.00624264	-12.3094	93.2244	-0.0313676	0.293061	0.768788	0.2838	0.720668	-18.9709	-0.021977	-10.7072	48.5101	-0.046468	0.517212	0.583222	0.204336	0.526084		TOPSIS2	0.814	0.97	0.643	-0.907	0.841	0.911	-0.841	-0.846	-0.985
	BAKAB	0.515856	-2.44363	0.00387288	-1.68861	57.1428	-0.00647028	0.310657	0.743891	0.282742	0.703174	-0.138877	-0.000632081	0.0525617	30.7959	0.000522115	0.537236	0.536232	0.201695	0.486696			0	0	0	0	0	0	0	0	0
	BANVT	0.0260586	-4.23749	-0.0022252	-2.20633	99.2856	-0.0176225	0.301829	0.755043	0.285059	0.713732	-6.80401	-0.00233718	-2.64608	51.2653	-0.021206	0.523764	0.55796	0.206449	0.510126
	BFREN	1.87533	30.3612	0.0782375	51.0364	6.67346	0.12906	0.406685	0.608361	0.2501	0.568254	51.4732	-0.0125647	66.2499	2.81632	0.327346	0.768567	0.209408	0.0899387	0.0748677		S2	-0.893	-0.849	-0.824	0.801	-0.987	-0.897	0.987	0.549	0.861
	BLCYT	-0.310692	-2.68618	-0.000240614	-1.46528	84.9591	-0.00647479	0.307124	0.743895	0.287225	0.709796	0.954019	0.0172387	0.534703	45.2857	0.00739803	0.528911	0.529356	0.206391	0.488437			0	0	0	0	0	0	0	0	0
	BNTAS	-0.0428571	-3.25153	-0.0042005	-1.76322	113.877	-0.0148299	0.303168	0.75225	0.288182	0.716556	-1.66493	0.0128605	-0.867036	59.2857	-0.0244738	0.517791	0.561228	0.207682	0.514414
	BOSSA	0.140777	-3.18353	0.00114273	-1.92038	82.1836	-0.011652	0.306771	0.749072	0.283699	0.707903	-2.9622	-0.00189963	-0.802464	42.2857	-0.0106723	0.531027	0.547426	0.20369	0.498097		R2	-0.339	-0.558	-0.223	0.727	-0.449	-0.457	0.449	0.647	0.606
	BRISA	-0.0103093	-0.877498	0.00237877	-0.973113	91.8571	-0.00422806	0.313181	0.741648	0.285815	0.706276	6.8624	0.0158067	1.39454	46.9796	0.0019598	0.529227	0.534794	0.211439	0.499998			0.004	0	0.063	0	0	0	0	0	0
	BRKO	0.901961	6.80668	0.0336613	-1.01843	35.6938	0.0171017	0.345761	0.720319	0.261686	0.657002	16.2779	-0.0550264	2.57593	18.3469	0.0456106	0.587974	0.491143	0.202575	0.453945
	BRKSN	0.395735	0.27407	0.00685565	-0.574187	54.7959	0.00512132	0.31899	0.732299	0.284152	0.697839	10.8152	0.0170653	2.64026	27.9796	0.0209655	0.541392	0.515788	0.202692	0.472731		Q2	-0.79	-0.865	-0.685	0.873	-0.854	-0.847	0.854	0.69	0.901
	BRSAN	0.32048	-3.11964	0.00191991	-1.94677	83.2244	-0.0127192	0.307513	0.75014	0.282692	0.707098	-2.90937	-0.0062129	-1.1193	44.2244	-0.013128	0.531325	0.549882	0.20598	0.503332			0	0	0	0	0	0	0	0	0
	BTCIM	0.140762	-24.4095	-0.0195195	-25.4603	66.6122	-0.0783055	0.277199	0.815726	0.279367	0.744159	-51.0441	-0.0886135	-56.587	32.8775	-0.127928	0.494535	0.664682	0.201284	0.583095
	BUCIM	0.488426	-0.750253	0.00721195	-1.21106	47.1632	-0.00017471	0.316778	0.737595	0.281886	0.697881	5.9218	0.00323533	0.837423	24.8571	0.0113976	0.541984	0.525356	0.203632	0.481343
	BURCE	1.34632	3.66167	0.0214394	-0.895254	24.6939	0.013731	0.333195	0.723689	0.272416	0.675001	13.6891	-0.0191791	1.47453	11.7755	0.0398913	0.569995	0.496863	0.198701	0.452544
	BURVA	1.78315	-13.24	-0.14651	-23.4458	62.102	-0.00371533	0.236059	0.741136	0.419705	0.90363	-34.486	0.466125	27.5898	30.7959	0.0182916	0.386451	0.518462	0.411749	0.783428
	CASA	0.571429	-3.18698	0.00824682	-4.892	46.4081	-0.0115394	0.311884	0.74896	0.276143	0.696675	-6.55396	-0.0318308	-7.94279	22.3469	-0.00741547	0.547526	0.544169	0.197585	0.486624
	CCOLA	0.0322581	-1.59112	0.0029677	-1.32398	83.0612	-0.00542795	0.312022	0.742848	0.284505	0.70511	4.07378	0.00869777	0.582521	43.8571	0.000584951	0.5322	0.536169	0.207858	0.495749
	CELHA	0.157895	-8.5795	-0.00647522	-9.86209	85.6121	-0.0233452	0.29324	0.760766	0.286016	0.718807	-17.4867	-0.00869703	-10.1585	43.4285	-0.0306832	0.522806	0.567437	0.190835	0.494228
	CEMAS	0.154362	-2.57931	6.62731e-05	-1.54516	86.1428	-0.00825568	0.3078	0.745676	0.286218	0.709448	0.9273	0.0116764	0.344571	46.4693	-0.00390359	0.528024	0.540658	0.205921	0.496279
	CEMTS	0.794189	-0.492085	0.00890627	-1.26792	51.7142	0.000861452	0.318602	0.736559	0.280324	0.694912	6.05017	-0.00228832	0.684368	26.7551	0.00945642	0.545653	0.527297	0.200344	0.477956
	CIMSA	0.48335	-0.68154	0.00930655	-1.3423	53.7755	-0.00103229	0.318433	0.738453	0.279518	0.694934	5.42792	-0.00634363	0.679053	30.1428	0.00863208	0.545155	0.528122	0.204395	0.484559
	CMBTN	1.07807	-4.92515	0.00109853	-6.80713	51.5101	-0.0115956	0.303067	0.749016	0.282188	0.705636	-11.6545	-0.012904	-9.03477	26	-0.00767309	0.541333	0.544427	0.182734	0.46489
	CMENT	0.458904	-2.90985	0.00324426	-1.85328	57.5305	-0.0077815	0.308982	0.745202	0.282742	0.704013	-2.10864	-0.00251356	-0.802856	29.3061	-0.000517468	0.537325	0.537271	0.199816	0.484708
	CUSAN	0.595628	-1.31727	0.00632118	-1.38799	49.2448	-0.00192208	0.314882	0.739342	0.281986	0.699148	3.78485	0.00131712	0.625879	25.7755	0.00800639	0.541318	0.528748	0.201753	0.481131
	DAGI	0.801626	1.06713	0.0168351	-1.1123	27.1224	0.00974182	0.327137	0.727679	0.275388	0.681941	9.69206	-0.0127345	1.12342	12.6939	0.0331906	0.563462	0.503563	0.196529	0.454398
	DERIM	0.128	-3.69254	-0.000886741	-2.0127	92.0815	-0.0138452	0.304228	0.751266	0.284958	0.711166	-4.47544	0.000682917	-1.14603	47.4081	-0.0148495	0.527046	0.551603	0.204219	0.502032
	DESA	0.279612	-2.55284	0.0010388	-1.57124	76.1836	-0.00679046	0.308532	0.744211	0.285563	0.707544	0.710879	0.00997278	0.370531	39.5918	-0.000667588	0.531271	0.537422	0.202927	0.489415
	DEVA	-0.0218182	-2.75294	-0.00362582	-1.46585	103.265	-0.0105232	0.304834	0.747944	0.289341	0.71551	1.32455	0.0219631	0.3704	54.0408	-0.00928544	0.51946	0.546039	0.209384	0.505457
	DITAS	0.796866	0.424681	0.0107664	-0.815544	30.3061	0.0160235	0.322178	0.721397	0.282641	0.688631	9.75658	0.017114	2.1098	16.2041	0.0445314	0.560227	0.492223	0.18068	0.422431
	DMSAS	0.318087	-1.37509	0.00506427	-1.35845	59.7346	-0.00313078	0.313858	0.740551	0.282944	0.701335	3.94057	0.0041672	0.649485	33.5918	0.00490504	0.537921	0.531849	0.20369	0.486333
	DOBUR	0.461538	-1.6041	0.00599433	-1.24256	56.4489	0.0119441	0.314462	0.725476	0.285412	0.695332	2.57496	0.0214834	4.14854	29.2857	0.0412926	0.556054	0.495461	0.174047	0.415083
	DOGUB	0.338078	-25.1645	-0.0786719	-26.5251	86.9591	-0.0639048	0.217885	0.801325	0.343894	0.830215	-38.8134	0.168221	-28.5736	42.2857	-0.101964	0.373034	0.638718	0.267905	0.661855
	DOKTA	0.225266	-3.51958	-0.00840712	-3.63228	112.633	-0.0313326	0.299798	0.768753	0.289039	0.72838	-1.16053	0.00806591	-11.2338	58.3469	-0.0476894	0.497403	0.584443	0.244898	0.586897
	DURDO	0.427027	-7.31493	-0.00254404	-11.9129	67.6734	-0.0200245	0.297674	0.757445	0.282994	0.712219	-16.6037	-0.0176463	-10.3674	35.7346	-0.024746	0.532133	0.5615	0.186667	0.48359
	DYOBY	0.408065	-0.404033	0.00578135	-0.92792	57.3469	0.00185704	0.316668	0.735563	0.284052	0.699779	8.02193	0.0134161	1.6505	29.9183	0.0146487	0.539316	0.522105	0.203221	0.478281
	EGEEN	0.167549	-3.69792	-0.0112124	-1.48528	94.4285	-0.0129137	0.297313	0.750334	0.295889	0.726708	-0.66899	0.0434785	0.709001	49.5918	-0.0132242	0.506398	0.549978	0.206978	0.504878
	EGGUB	0.516827	-0.620568	0.00802875	-1.10742	38.102	0.00434725	0.317677	0.733073	0.282339	0.695657	6.53584	0.00815765	1.05201	19.2653	0.0240889	0.547078	0.512665	0.198114	0.463612
	EGPRO	0.533333	-1.85821	0.00405445	-1.48009	61.6734	-0.00331373	0.312085	0.740734	0.283598	0.702418	2.11795	0.00544923	0.53086	32.2245	0.00494652	0.538015	0.531807	0.199816	0.480581
	EGSER	0.29207	-1.61813	0.00418066	-1.37385	65.1632	-0.00421887	0.312737	0.741639	0.283548	0.702923	3.4714	0.00568246	0.588761	34.7347	0.00434564	0.535909	0.532408	0.205334	0.489182
	EKIZ	-0.0869141	-27.3272	-0.0472104	-25.5235	111.837	-0.0722758	0.239654	0.809696	0.309238	0.784403	-50.8656	0.029489	-17.4239	55.0816	-0.121654	0.437469	0.658408	0.202147	0.579632
	EMKEL	0.228374	-3.47984	0.00183448	-2.0968	76.6121	-0.0133135	0.306673	0.750734	0.282339	0.706958	-4.72541	-0.00888744	-2.41578	38.2653	-0.0142641	0.532481	0.551018	0.203103	0.499943
	EPLAS	0.162651	-1.81124	6.03851e-05	-1.25754	92.9387	-0.00582476	0.309532	0.743245	0.287225	0.70938	3.98021	0.0183524	0.834357	48.5306	-0.000712102	0.527068	0.537466	0.207154	0.495689
	ERBOS	0.373162	-1.96128	0.00408589	-1.50033	61.6326	-0.00493357	0.311716	0.742354	0.283296	0.703009	1.8925	0.00366186	0.442094	34.1428	0.0052946	0.536799	0.531459	0.204277	0.486906
	EREGL	0.131579	-2.71875	0.00253139	-1.76236	82.1428	-0.0103833	0.309094	0.747804	0.282994	0.70605	-0.888166	-0.00249481	-0.182973	44.8979	-0.00854068	0.532186	0.545295	0.206561	0.500726
	ERSU	0.217978	-2.39921	0.00488088	-1.69054	51.2244	-0.00557489	0.311446	0.742995	0.282037	0.70156	-0.112365	-0.00249918	-0.1012	25.2245	0.00451824	0.539795	0.532236	0.201342	0.483158
	FMIZP	1.47301	48.6177	0.143238	103.061	6.99999	0.176545	0.481177	0.560876	0.2027	0.467883	82.907	-0.140991	68.0394	3.44897	0.426482	0.853224	0.110272	0.0901638	0.000332291
	FORMT	0.259375	-1.34861	0.00133911	-1.12147	77.7754	-0.00234026	0.311454	0.739761	0.286973	0.706778	5.38737	0.0201398	1.27286	40.4081	0.00574259	0.530914	0.531011	0.203573	0.485527
	FRIGO	0.267403	0.635134	0.0172181	-1.15174	25.7755	0.0154288	0.326889	0.721992	0.276244	0.679566	8.2684	-0.00669927	2.04037	13.3877	0.0498084	0.572101	0.486946	0.184789	0.424513
	FROTO	0.234133	1.5931	0.00591911	2.13588	72.653	0.00839598	0.320741	0.729024	0.286419	0.69909	15.1056	0.0293941	6.62758	38.5918	0.0255686	0.538365	0.511185	0.204043	0.471248
	GEDZA	0.543612	-0.604029	0.00768832	-1.18535	50.1836	0.000508855	0.317572	0.736912	0.281583	0.696997	6.37562	0.0025924	0.896022	25.8979	0.0108427	0.54288	0.525911	0.202575	0.480202
	GENTS	0.121771	-1.37106	0.00284089	-1.21081	76.0204	-0.00345112	0.31234	0.740871	0.285261	0.704961	4.94691	0.0132014	0.837541	39.4694	0.00552452	0.532852	0.531229	0.206391	0.489852
	GEREL	0.102848	-4.09576	-0.00470902	-2.0048	105.816	-0.0152852	0.300519	0.752706	0.288283	0.716996	-4.96882	0.0117716	-0.558753	55.6326	-0.0179884	0.519698	0.554742	0.204512	0.504836
	GOLTS	0.368656	-2.81711	0.00330361	-1.86455	73.2856	-0.0102737	0.309351	0.747694	0.282087	0.704641	-1.73594	-0.0063693	-0.68742	38.0612	-0.00833371	0.534652	0.545088	0.204277	0.497198
	GOODY	0	-1.79306	0.00156231	-1.33913	87.9591	-0.00603563	0.310578	0.743456	0.285664	0.707209	3.59501	0.0123361	0.585206	46.2245	-0.000693985	0.529776	0.537448	0.207506	0.496195
	GUBRF	0.160405	-1.20747	0.00259084	-1.1173	67.8571	0.00403965	0.312819	0.733381	0.287124	0.702919
	HATEK	0.363931	-1.45115	0.00881839	-1.67607	59.0612	-0.00533998	0.31621	0.74276	0.27846	0.696129
	HEKTS	-0.124211	-6.0243	-0.0157472	-2.06318	121.816	-0.0241204	0.289939	0.761541	0.296695	0.73507
	HURGZ	0.597122	-0.578743	0.0142066	-1.64677	43.9183	-0.000105308	0.321944	0.737526	0.274733	0.687276
	IHEVA	0.00900901	-4.39837	-0.00627914	-1.89891	100.694	-0.0148473	0.298593	0.752268	0.290248	0.719616
	IHGZT	1.4331	16.3215	0.0661601	1.7687	27.1224	0.0526188	0.381639	0.684802	0.240983	0.603708
	ISDMR	-0.00964187	-3.29404	-0.00113763	-1.86367	104.633	-0.0136758	0.304965	0.751096	0.285513	0.711875
	JANTS	1.94838	7.43737	0.0281394	-0.376418	12.5714	0.032643	0.341329	0.704777	0.271459	0.661486
	KAPLM	0.686254	-2.00685	0.00480184	-1.54879	53.4285	-0.000207386	0.312306	0.737628	0.283447	0.700208
	KARSN	0.0614334	-4.47049	-0.00719452	-2.01099	106.796	-0.0168884	0.297951	0.754309	0.290248	0.720922
	KARTN	0.57951	-0.76319	0.00906519	-1.05755	37.9796	0.00652935	0.317791	0.730891	0.282238	0.694112
	KATMR	-0.543825	-6.97773	-0.00565704	-5.96766	104.755	-0.0343562	0.295397	0.771777	0.283397	0.721985
	KENT	-0.349747	179.886	0.498775	138.765	16.6734	0.647501	0.84211	0.0899193	0.0899193	0
	KERVT	0.317181	-1.56627	0.00448933	-1.37926	60.9591	-0.0030688	0.313136	0.740489	0.283447	0.702039
	KLMSN	-0.0810313	-3.27106	-0.000484794	-1.87647	102.02	-0.0136084	0.305464	0.751029	0.284908	0.71094
	KNFRT	0.821123	-1.38982	0.00920844	-1.62736	42.102	-0.000561208	0.316705	0.737982	0.279166	0.694112
	KONYA	1.07306	4.59096	0.0272658	-0.619311	19.5306	0.0307318	0.338303	0.706689	0.271862	0.663304
	KORDS	-0.0698234	-3.69821	-0.00235609	-1.94234	108.551	-0.0149764	0.303196	0.752397	0.286268	0.713823
	KRDMA	0.435407	-3.12423	0.00299203	-2.00428	65.9183	-0.0113429	0.308236	0.748763	0.281886	0.705028
	KRDMB	0.153392	-3.48707	0.00125048	-2.05473	82.653	-0.0139844	0.306224	0.751405	0.282843	0.708131
	KRDMD	0.0430769	-3.58076	0.0006556	-2.0708	88.6938	-0.0147821	0.305535	0.752202	0.283195	0.709162
	KRSTL	0.0322581	-3.49133	-0.0018711	-1.88684	104.163	-0.0136827	0.30406	0.751103	0.286167	0.712847
	KRTEK	0.532086	-0.596082	0.00775607	-1.17732	46.204	0.000920581	0.317634	0.7365	0.281634	0.696808
	KUTPO	-0.157925	-10.7634	-0.024579	-2.6997	126.571	-0.0338064	0.278698	0.771227	0.301783	0.748779
	LUKSK	0.912533	-0.899522	0.0139966	-1.78132	40.7142	0.000416514	0.321128	0.737004	0.274733	0.686942
	MAKTK	0.00858369	-9.94037	-0.0230431	-2.57007	110.755	-0.0283889	0.280115	0.765809	0.301984	0.74561
	MNDRS	-0.042042	10.0342	0.0208244	22.8667	77.7958	0.0859129	0.34878	0.651507	0.284606	0.646809
	MRSHL	4.07222	32.1865	0.0768522	34.2628	14.8163	0.136614	0.411397	0.600806	0.249395	0.562378
	NIBAS	1.60397	58.0425	0.198358	71.921	22.3265	0.172923	0.529583	0.564497	0.195709	0.459879
	NUHCM	0.385023	-1.76634	0.00449711	-1.41873	61.2857	-0.00401026	0.312584	0.741431	0.283246	0.702344
	OLMK	0.932462	-1.82023	0.00848258	-1.6558	40.2244	0.00227719	0.315271	0.735143	0.280425	0.694155
	OTKAR	-0.0794923	-1.6697	-0.00143512	-1.11429	106.163	-0.00919684	0.308915	0.746617	0.288082	0.712802
	OYAKC	0.118644	-4.31415	-0.0102787	-1.75833	90.5714	-0.0147367	0.296281	0.752157	0.294177	0.725346
	OYLUM	0.582278	-1.18118	0.00812952	-1.42854	42.3061	-0.000426248	0.316363	0.737847	0.280626	0.696183
	PARSN	0.159375	-2.4945	0.00172371	-1.64038	91.6734	-0.00956289	0.309068	0.746983	0.284152	0.707235
	PENGD	1.46632	7.60904	0.0328694	-0.753159	21.2653	0.0253483	0.345305	0.712072	0.26486	0.656411
	PETKM	-0.0163934	-2.16172	0.00218312	-1.53946	90.3469	-0.00836329	0.310057	0.745784	0.284152	0.706468
	PETUN	0.376113	-2.29805	0.00348168	-1.63938	66.8775	-0.00723351	0.310629	0.744654	0.283044	0.704109
	PINSU	0.382906	-0.821853	0.00558134	-1.15698	57.0612	0.00485196	0.315584	0.732568	0.28445	0.69845
	PNSUT	0.169832	-2.91877	0.00171682	-1.81476	83.5101	-0.0111202	0.307939	0.748541	0.283498	0.707265
	PRKAB	0.925287	-1.61399	0.00713937	-1.48943	41.1428	0.00207662	0.314954	0.735344	0.281886	0.69644
	PRZMA	0.0158371	-41.8464	-0.141423	-61.0772	123.306	-0.124341	0.162971	0.861761	0.385049	0.929651
	RTALB	0.350486	-4.32784	-0.0108913	-1.74737	74.6122	-0.00852165	0.295849	0.745942	0.296091	0.724195
	SAMAT	0.27451	-2.98406	0.000546903	-1.76661	74.3673	-0.00848463	0.306923	0.745905	0.285261	0.708182
	SANFM	0.479798	-2.74799	0.00328098	-1.79634	61.8367	-0.00671482	0.309525	0.744135	0.282994	0.703702
	SARKY	0.493333	-0.213119	0.00749383	-0.931015	44.9796	0.00458084	0.318332	0.73284	0.283044	0.696549
	SASA	0.54537	-3.0826	0.0058587	-2.60872	57.9183	-0.00832691	0.31048	0.745747	0.279417	0.699453
	SAYAS	0.455635	-2.83237	0.00205519	-1.86803	76.4285	-0.00587665	0.308671	0.743297	0.283901	0.704505
	SEKUR	0.891104	-2.38892	0.00507272	-1.77813	56.8571	-0.00723634	0.311574	0.744657	0.281281	0.701507
	SELGD	0.564103	16.1504	0.0664384	3.29889	28.7347	0.0455878	0.38212	0.691833	0.239018	0.605306
	SILVR	-0.0163934	-3.06758	-0.000684847	-1.7658	99.0815	-0.0121594	0.305841	0.74958	0.285664	0.711128
	SKTAS	0.613971	33.3461	0.033733	22.254	74.2244	0.06963	0.382187	0.66779	0.282843	0.654625
	SNPAM	0.864865	11.1744	0.0481133	-0.67446	26.204	0.0372953	0.361474	0.700125	0.253274	0.63166
	TATGD	0.15	-2.99848	0.000283533	-1.79506	91.7958	-0.0112577	0.30675	0.748678	0.284807	0.709287
	TBORG	0.179487	-2.15373	-0.00420975	-1.03944	87.9183	-0.00570039	0.305919	0.743121	0.291557	0.715697
	TIRE	-0.0518207	-3.76975	-0.0047595	-1.8604	109.102	-0.0154457	0.301338	0.752866	0.288636	0.717619
	TMPOL	0.216867	-2.4066	-0.000859596	-1.46084	92.1632	-0.00725136	0.307595	0.744672	0.287427	0.71059
	TMSN	0.197802	-2.3144	0.00442867	-1.7152	63.7754	-0.00826985	0.311241	0.74569	0.281785	0.702912
	TOASO	-0.0716981	-1.25415	0.000967994	-1.08897	99.4693	-0.0045297	0.311369	0.74195	0.286873	0.708031
	TTRAK	0.269841	-0.588988	0.00382705	-0.86443	74.8571	-8.7458e-06	0.315007	0.737429	0.285513	0.70313
	TUCLK	0.514286	-1.59931	0.00726781	-1.59371	56.4285	-0.0042957	0.314957	0.741716	0.280223	0.698064
	TUKAS	0.097561	-3.02598	-0.00699299	-1.45556	112.51	-0.0130739	0.301891	0.750494	0.291759	0.720712
	TUPRS	-0.110615	-4.09812	-0.00158936	-2.19094	97.8979	-0.0175963	0.302547	0.755017	0.284505	0.712897
	ULKER	-0.0592593	-2.45307	0.000777904	-1.56452	99.0815	-0.00941715	0.308551	0.746838	0.28521	0.708704
	ULUUN	0.115261	-2.67806	0.00118364	-1.6704	89.7754	-0.00990067	0.308285	0.747321	0.284555	0.708047
	USAK	0.0416667	-2.71631	0.00252638	-1.75793	80.306	-0.0102276	0.309094	0.747648	0.283044	0.706025
	VESBE	0.103937	-0.997208	0.00261819	-1.07815	88.2448	-0.00287269	0.312991	0.740293	0.285714	0.70526
	VESTL	0.0689231	-2.06409	0.00230807	-1.48987	85.3673	-0.00740521	0.310419	0.744826	0.284354	0.706152
	YATAS	0.0446009	-1.36738	0.00110277	-1.11857	91.1224	-0.00444774	0.311221	0.741868	0.286772	0.70783
	YUNSA	-0.0820312	-3.04427	-0.00328092	-1.63715	107.326	-0.0132204	0.304181	0.750641	0.288132	0.715451

## Sheet: 2020 06
		2020/06	CODAS	COPRAS	ELC3	FUCA	MABAC	TOPSIS	S	R	Q	CODAS2	COPRAS2	ELC2	FUCA2	MABAC2	TOPSIS2	S2	R2	Q2			CODAS	COPRAS	ELC3	FUCA	MABAC	TOPSIS	S	R	Q
	ACSEL	0.775047	8.96055	0.0718716	-1.1618	43.204	0.0163141	0.26229	0.714631	0.335733	0.632462	6.22362	0.063579	-0.829045	23.7347	0.0167355	0.258972	0.73487	0.341069	0.681086
	ADEL	0.43487	7.05958	0.0731075	-2.54628	81.0816	-0.00682023	0.250254	0.737765	0.340063	0.666734	5.55949	0.0602431	-1.68397	45.7347	-0.00867377	0.249607	0.76028	0.345468	0.720345		CODAS2	0.994	0.929	0.828	-0.569	0.771	0.707	-0.771	-0.071	-0.65
	AEFES	0.141033	6.92816	0.070271	-3.63902	66.4489	-0.00528222	0.267928	0.736227	0.32726	0.635827	4.8178	0.0598967	-3.3154	34.2449	-0.0115653	0.265622	0.763171	0.332461	0.693933			0	0	0	0	0	0	0	0.557	0
	AFYON	-0.328629	9.6454	0.0811429	-2.98865	50.1837	0.00882665	0.272266	0.722118	0.32847	0.623734	6.62444	0.0712586	-2.58205	25.551	0.00398534	0.269121	0.74762	0.33369	0.678872
	AKCNS	0.835227	4.078	0.0480604	-2.78804	53.9591	-0.000547572	0.253691	0.731492	0.337084	0.653311	3.01136	0.0417381	-2.50861	30.4898	-0.00342454	0.249883	0.75503	0.342441	0.707392		COPRAS2	0.94	0.998	0.672	-0.51	0.611	0.646	-0.611	-0.073	-0.566
	AKSA	0.149842	-5.4692	-0.0065899	-5.36575	108.837	-0.0232096	0.240249	0.754154	0.34146	0.687193	-4.51143	-0.00448733	-6.05176	58.2448	-0.034992	0.232053	0.786598	0.346887	0.753836			0	0	0	0	0	0	0	0.548	0
	ALCAR	0.884892	2.70317	0.0396067	-3.14028	52.9795	-0.00220964	0.254845	0.733154	0.33564	0.65176	1.82875	0.0351052	-3.13355	29.6734	-0.00674033	0.250075	0.758346	0.340974	0.707851
	ALKA	1.00704	25.0973	0.167906	7.14174	52.7142	0.0344725	0.266825	0.696472	0.339924	0.62292	19.0682	0.140802	6.76569	29.5306	0.0479483	0.273096	0.703657	0.345326	0.654945		ELC2	0.887	0.717	0.947	-0.587	0.884	0.659	-0.884	-0.047	-0.691
	ALKIM	-0.732959	26.0292	0.173969	6.48925	59.8163	0.0320715	0.261011	0.698873	0.342671	0.631733	20.1527	0.143795	9.04996	33.2653	0.0496761	0.270025	0.70193	0.348116	0.659339			0	0	0	0	0	0	0	0.697	0
	ALMAD	1.375	92.5406	0.202171	128.529	25.8163	0.34368	0.734979	0.387265	0.209989	0	47.6257	0.242841	63.1091	14.3061	0.348353	0.731094	0.403253	0.20986	0
	ARCLK	0.469719	2.9013	0.0471378	-3.84996	77.8571	-0.0128602	0.251167	0.743805	0.337456	0.667132	2.1584	0.0395592	-3.49709	42.1836	-0.0195442	0.24767	0.77115	0.342819	0.726783		FUCA2	-0.547	-0.416	-0.572	0.984	-0.762	-0.829	0.762	0.677	0.888
	ARSAN	0.778571	2.82865	0.0408134	-3.47085	56.102	-0.00380177	0.262916	0.734746	0.329634	0.639699	1.69306	0.0365973	-3.70126	30.0816	-0.0107365	0.257906	0.762342	0.334873	0.698495			0	0	0	0	0	0	0	0	0
	ASUZU	0.680851	-7.52002	-0.0299038	-4.92658	67.4489	-0.0120852	0.250004	0.74303	0.334383	0.659287	-6.70252	-0.0208255	-6.90977	34.7959	-0.0238532	0.239084	0.775459	0.339697	0.724599
	ATEKS	0.546512	-4.69736	-0.00598693	-5.23074	72.5305	-0.0155943	0.254516	0.746539	0.332148	0.657871	-4.23134	-0.00190427	-6.42682	37.6326	-0.0283662	0.245568	0.779972	0.337427	0.724596		MABAC2	0.84	0.653	0.927	-0.748	0.987	0.777	-0.987	-0.184	-0.841
	AVOD	1.17919	-6.24094	-0.0380646	-1.25605	51.1836	0.00913313	0.2521	0.721812	0.335128	0.638641	-5.7584	-0.0252426	-1.11978	25.4285	0.00476666	0.240917	0.746839	0.340454	0.693436			0	0	0	0	0	0	0	0.127	0
	AYGAZ	0.428571	-0.774852	0.0220262	-4.20603	83.8775	-0.0142949	0.245887	0.74524	0.339877	0.674182	-0.651893	0.0193142	-4.30268	46.5714	-0.022169	0.240096	0.773775	0.345278	0.735423
	BAGFS	0.471795	-14.8385	-0.0722722	-7.03392	78.9183	-0.022804	0.243864	0.753749	0.335594	0.673347	-12.2924	-0.0555114	-9.96629	41.4897	-0.0403622	0.229259	0.791968	0.340927	0.746384		TOPSIS2	0.868	0.729	0.777	-0.775	0.854	0.958	-0.854	-0.447	-0.902
	BAKAB	0.39528	6.68526	0.0733096	-3.00439	88.8979	-0.0109315	0.249934	0.741876	0.33997	0.670852	5.26421	0.0600495	-2.12767	49.0612	-0.01442	0.249283	0.766026	0.345373	0.726733			0	0	0	0	0	0	0	0	0
	BANVT	0.51418	-6.20397	-0.0159796	-4.99268	86.7142	-0.0170169	0.242042	0.747962	0.340436	0.678327	-5.27326	-0.0109869	-6.2013	48.4693	-0.0279743	0.232541	0.77958	0.345846	0.743392
	BFREN	0.641357	23.5074	0.0886003	33.0435	23.8163	0.105777	0.285297	0.625168	0.333871	0.533967	17.9979	0.0844665	17.7943	12.449	0.143138	0.29088	0.608467	0.339177	0.531487		S2	-0.84	-0.653	-0.927	0.748	-0.987	-0.777	0.987	0.184	0.841
	BLCYT	0.272	-4.27257	-0.00149455	-4.95243	81.4285	-0.0168708	0.24966	0.747816	0.335547	0.66699	-3.74047	0.000957703	-5.77337	41.551	-0.0282737	0.241486	0.77988	0.34088	0.732383			0	0	0	0	0	0	0	0.127	0
	BNTAS	0.438356	2.19009	0.0395939	-3.62713	70.7142	-0.00766028	0.249525	0.738605	0.339365	0.666022	1.46892	0.0343216	-3.54277	39.8571	-0.0135907	0.244751	0.765196	0.344758	0.724374
	BOSSA	0.475645	-20.7414	-0.115616	-9.66431	80.4285	-0.0233331	0.237956	0.754278	0.337596	0.678483	-17.1537	-0.0900797	-11.7184	42.7142	-0.0427157	0.219726	0.794321	0.342961	0.753738		R2	-0.113	-0.053	-0.064	0.621	-0.254	-0.609	0.254	1	0.569
	BRISA	0.751389	1.94387	0.0305298	-2.98696	57.3673	0.00363611	0.253584	0.727309	0.336432	0.647413	1.4216	0.0281074	-2.70464	30.8367	0.00192584	0.248557	0.74968	0.341778	0.699729			0.352	0.666	0.599	0	0.034	0	0.034	*	0
	BRKO	1.04	-6.36798	-0.0417382	-4.80687	65.8979	0.00843855	0.299373	0.722506	0.303142	0.566206	-7.15465	-0.0238986	-9.03586	33.6122	-0.00832996	0.28656	0.759936	0.30796	0.634203
	BRKSN	0.701613	-2.64401	0.00469966	-4.15854	73.204	-0.00912326	0.245925	0.740068	0.339505	0.667882	-2.49287	0.00624172	-4.54955	40.2244	-0.0163882	0.238327	0.767994	0.3449	0.727914		Q2	-0.765	-0.581	-0.834	0.837	-0.968	-0.9	0.968	0.428	0.944
	BRSAN	0.568548	-6.02716	-0.011274	-5.76638	88.9387	-0.0219108	0.248037	0.752856	0.33578	0.672832	-5.03271	-0.0072755	-6.92682	47.1836	-0.035658	0.239009	0.787264	0.341116	0.74141			0	0	0	0	0	0	0	0	0
	BTCIM	0.616114	-45.7258	-0.281391	-25.1993	73.9999	-0.0461328	0.238818	0.777078	0.328424	0.681518	-37.3801	-0.221944	-15.9592	38.5102	-0.0866962	0.210624	0.838302	0.333643	0.782984
	BUCIM	0.380192	3.22997	0.0500362	-3.77164	81.3877	-0.0132708	0.250163	0.744215	0.338294	0.669482	2.4504	0.0416793	-3.36045	43.7551	-0.0195813	0.247057	0.771187	0.34367	0.728772
	BURCE	0.756654	-4.43103	-0.0109131	-4.62481	65.0612	-0.00524016	0.268417	0.736185	0.323209	0.626517	-4.2455	-0.00366799	-6.47229	33.6326	-0.0175678	0.25863	0.769174	0.328346	0.691424
	BURVA	0.674634	1.35704	-0.0667321	20.9849	89.6529	0.0867751	0.231808	0.64417	0.387739	0.677205	3.11456	-0.0481921	50.8187	45.0816	0.131253	0.243693	0.620353	0.393901	0.670253
	CASA	1.27027	-6.061	-0.0219625	-4.53973	58.551	-0.00804051	0.251883	0.738985	0.333918	0.653962	-5.43189	-0.0140318	-6.3046	30.6122	-0.0182561	0.241559	0.769862	0.339224	0.717085
	CCOLA	0.24	7.58097	0.0796197	-3.0958	73.9387	-0.0097191	0.254578	0.740664	0.337037	0.662865	5.88969	0.0655871	-2.16062	39.449	-0.0136296	0.254146	0.765235	0.342393	0.719012
	CELHA	0.535354	-72.1773	-0.499968	-1.85255	86.3876	-0.037018	0.212466	0.767963	0.341041	0.700779	-53.7894	-0.395419	-29.0452	47.8571	-0.0816533	0.185963	0.833259	0.346461	0.806491
	CEMAS	0.986667	22.8545	0.15586	2.54464	29.3469	0.029808	0.281939	0.701137	0.326235	0.596522	16.9608	0.132176	2.81786	15.9388	0.0373317	0.285726	0.714274	0.33142	0.635357
	CEMTS	0.482944	6.84435	0.0659335	-2.62715	67.7346	0.00444095	0.25511	0.726504	0.339272	0.653062	4.96224	0.0571171	-2.28629	37.1224	0.0019278	0.251774	0.749678	0.344664	0.706323
	CIMSA	0.568038	3.79086	0.0485966	-3.52549	62.5306	-0.0051815	0.263583	0.736126	0.329308	0.640407	2.58128	0.042557	-3.50717	33.4898	-0.0120115	0.259404	0.763617	0.334542	0.699203
	CMBTN	1.11228	-21.786	-0.128797	-10.7136	72.8366	-0.018359	0.237072	0.749304	0.338294	0.674842	-18.2168	-0.0999835	-11.7477	38.6326	-0.0367505	0.217677	0.788356	0.34367	0.748505
	CMENT	1.16497	-13.0778	-0.0819445	-6.77998	44.4693	-0.000270667	0.265458	0.731215	0.323163	0.621176	-11.9131	-0.0589496	-10.03	22.6734	-0.0157687	0.249517	0.767374	0.328298	0.689248
	CUSAN	0.537815	-4.44505	-0.00238588	-4.86451	83.3673	-0.0169977	0.244151	0.747942	0.339644	0.676496	-3.77778	-0.000134425	-5.53752	45.7142	-0.0275073	0.235896	0.779113	0.345042	0.741017
	DAGI	2.23684	14.7536	0.0969735	-0.338322	21.7551	0.0332704	0.288246	0.697674	0.318227	0.574557	10.4776	0.0861951	0.684678	10.4694	0.0385017	0.287068	0.713104	0.323285	0.615414
	DERIM	0.549587	-5.41481	-0.0114871	-4.69686	83.3468	-0.0143275	0.244088	0.745272	0.339272	0.672832	-4.4441	-0.00718201	-5.74876	45.4693	-0.0239877	0.235197	0.775593	0.344664	0.736107
	DESA	0.48415	-15.2097	-0.0759714	-6.95267	85.1223	-0.0211845	0.239659	0.752129	0.33848	0.678244	-12.4465	-0.0586868	-9.73911	45.3673	-0.0372103	0.224834	0.788816	0.34386	0.749466
	DEVA	0.845638	15.419	0.116364	0.0136258	38.2245	0.0143384	0.262769	0.716606	0.335547	0.634117	12.1368	0.097348	1.30346	19.8163	0.0201326	0.265286	0.731473	0.34088	0.67675
	DITAS	0.619361	-5.45286	-0.0330824	3.2939	73.9183	0.0107907	0.245594	0.720154	0.340436	0.649036	-4.94907	-0.0218753	3.33725	40.8163	0.00933224	0.235444	0.742274	0.345846	0.700516
	DMSAS	0.924	-14.5991	-0.0751633	-6.74306	71.5918	-0.0173341	0.24189	0.748279	0.337503	0.671952	-12.1277	-0.0573979	-9.56306	38.204	-0.0327097	0.226883	0.784315	0.342866	0.742022
	DOBUR	2.81232	3.78518	-0.112636	25.8452	28.5102	0.137114	0.316027	0.593831	0.313199	0.453673	-0.84424	-0.0680894	31.5777	14.3673	0.165337	0.310892	0.586269	0.318176	0.457964
	DOGUB	0.682635	-23.3629	-0.0893618	-58.0317	87.8979	-0.0779313	0.155446	0.808876	0.421867	0.928761	-15.1217	-0.0853024	-33.683	43.551	-0.0865854	0.146591	0.838191	0.428571	0.999873
	DOKTA	0.721022	5.70606	-0.0734047	42.9678	57.102	0.139934	0.292355	0.591011	0.336385	0.50374	4.86662	-0.0413575	57.4452	30.2449	0.184322	0.297965	0.567284	0.341731	0.489993
	DURDO	-0.0159574	-27.9295	-0.143611	-13.7077	126.02	-0.047285	0.221943	0.77823	0.344998	0.720646	-22.1881	-0.115551	-14.287	66.9183	-0.0741452	0.201292	0.825751	0.350481	0.807053
	DYOBY	0.561713	24.4418	0.18473	5.48794	71.8367	0.0100578	0.260678	0.720887	0.340296	0.649489	19.4574	0.150028	4.95073	41.0204	0.0206679	0.270785	0.730938	0.345704	0.687163
	EGEEN	0.255182	20.721	0.136107	1.49379	21.4081	0.0326853	0.284855	0.698259	0.322371	0.584651	15.2689	0.116598	2.54522	11.0612	0.0410975	0.287355	0.710508	0.327494	0.622054
	EGGUB	1.06262	11.1286	0.0895328	-1.25852	48.9591	0.0106521	0.256815	0.720293	0.338201	0.64407	8.55632	0.0754321	0.0324143	25.9388	0.0146127	0.25715	0.736993	0.343576	0.689257
	EGPRO	0.556017	-4.25353	-0.00431903	-4.44737	77.0203	-0.0120416	0.245745	0.742986	0.338713	0.669146	-3.60258	-0.00118892	-5.21968	41.8163	-0.0207764	0.237436	0.772382	0.344096	0.731119
	EGSER	0.615625	3.21667	0.0475014	-3.56914	69.0612	-0.0098576	0.252909	0.740802	0.336571	0.661946	2.34333	0.0403383	-3.30603	37.6326	-0.0159973	0.249216	0.767603	0.34192	0.720652
	EKIZ	5.87248	10.9421	0.0239801	31.8176	24.4898	0.10091	0.321307	0.630035	0.30291	0.468271	7.70154	0.0369355	14.5209	12.2041	0.121916	0.317326	0.62969	0.307724	0.483972
	EMKEL	1.125	-1.97161	0.00879939	-4.11416	63.3469	-0.00836946	0.253795	0.739314	0.333918	0.654308	-2.08597	0.0101366	-4.65612	33.3673	-0.0166959	0.246414	0.768302	0.339224	0.715292
	EPLAS	0.509091	8.54375	0.0778723	-1.92581	70.2244	0.00216353	0.250284	0.728781	0.341646	0.660893	6.65554	0.064986	-0.876018	38.6938	0.003484	0.249808	0.748122	0.347076	0.710049
	ERBOS	0.34404	1.7483	0.039258	-4.07543	78.551	-0.0127468	0.248628	0.743692	0.339225	0.67106	1.14587	0.033364	-3.86946	43.1428	-0.019951	0.244165	0.771557	0.344616	0.73136
	EREGL	0.113182	-1.01081	0.0233002	-5.2449	85.204	-0.0193736	0.250494	0.750318	0.336059	0.670798	-0.966943	0.0202421	-5.37586	45.2449	-0.0301605	0.24474	0.781766	0.3414	0.735741
	ERSU	0.282421	-1.66135	0.00919457	-4.07582	78.3265	-0.00349682	0.245974	0.734442	0.341507	0.666535	-1.81199	0.0108817	-4.51491	43.1632	-0.0101855	0.237735	0.761791	0.346934	0.725435
	FMIZP	0.270574	36.7141	0.121597	131.668	63.204	0.155434	0.33623	0.575511	0.348118	0.514251	22.0039	0.125962	65.2081	32.8979	0.179859	0.33454	0.571747	0.35365	0.522372
	FORMT	0.59204	-16.1467	-0.0938651	-7.26751	79.8162	-0.0113743	0.238454	0.742319	0.339691	0.670679	-13.6074	-0.0719663	-8.84039	43.5306	-0.0245412	0.222236	0.776147	0.345089	0.737716
	FRIGO	0.997792	7.70973	0.0668202	-1.89506	47.7142	0.0105813	0.256111	0.720363	0.337922	0.643506	5.68476	0.0578403	-1.29194	26.7347	0.0121775	0.253769	0.739428	0.343292	0.691407
	FROTO	0.438718	9.33156	0.0795881	-1.62703	71.5714	0.0067865	0.250606	0.724158	0.341739	0.656236	7.2877	0.0665134	-0.098243	38.7142	0.010742	0.250772	0.740864	0.34717	0.701923
	GEDZA	0.464516	7.89167	0.0770784	-2.45133	63.4693	-0.00225926	0.254321	0.733204	0.338341	0.65799	6.06642	0.0645554	-1.72823	35.0612	-0.00439186	0.253126	0.755998	0.343718	0.711423
	GENTS	0.361809	2.09555	0.0402678	-3.69545	72.6734	-0.0107457	0.249629	0.74169	0.338573	0.667461	1.40604	0.034331	-3.53367	40.2449	-0.0170574	0.245341	0.768663	0.343954	0.72652
	GEREL	1.78414	5.9054	0.0442255	0.977861	28.8979	0.0266247	0.265711	0.70432	0.331497	0.61191	4.24449	0.0422311	3.30008	15.9796	0.0310241	0.261241	0.720582	0.336765	0.654825
	GOLTS	0.608072	-5.52748	-0.011056	-5.13883	74.1428	-0.0164474	0.251561	0.747392	0.333824	0.662604	-4.71652	-0.00626888	-6.48288	38.4694	-0.02903	0.242316	0.780636	0.33913	0.729251
	GOODY	0.574344	-8.44709	-0.0337351	-5.45087	79.306	-0.0166484	0.242728	0.747593	0.339505	0.675809	-7.51523	-0.0245077	-7.42756	43.4693	-0.0298531	0.230955	0.781459	0.3449	0.743389
	GUBRF	0.892003	41.7066	0.208082	41.6471	36.6734	0.106192	0.285575	0.624753	0.338108	0.543222
	HATEK	0.306065	-1.36977	0.0128972	-4.93626	71.204	-0.0108138	0.263113	0.741759	0.327446	0.642079
	HEKTS	0.420738	0.619542	0.0266433	-3.51943	90.2856	-0.00516385	0.244673	0.736109	0.341646	0.668611
	HURGZ	0.544444	-7.29591	-0.0302315	-5.16339	62.102	-0.0100496	0.261451	0.740994	0.326794	0.639783
	IHEVA	0.0471698	-2.9422	0.0162439	-6.19427	121.286	-0.0358932	0.226716	0.766838	0.351703	0.723983
	IHGZT	-0.432	-19.5399	-0.0537911	-20.9196	133.551	-0.097506	0.183557	0.828451	0.376891	0.846499
	ISDMR	0.156051	-0.330834	0.0298269	-5.08559	100.347	-0.021148	0.245576	0.752093	0.33983	0.681294
	JANTS	0.334252	14.6296	0.126952	-0.34128	83.5918	-0.00349584	0.248838	0.734441	0.345278	0.675161
	KAPLM	0.794727	-0.587761	0.0133443	-3.54484	69.102	-0.000380719	0.247567	0.731325	0.339644	0.658993
	KARSN	1.3254	0.881148	0.0144942	-1.85127	39.3265	0.0160355	0.262491	0.714909	0.330798	0.621466
	KARTN	0.336707	7.39361	0.0752477	-2.59614	79.5305	-0.00548448	0.246438	0.736429	0.343974	0.674274
	KATMR	1.04065	-15.13	-0.108071	-7.41568	52.306	0.00775109	0.269147	0.723194	0.320322	0.606229
	KENT	1.86879	62.8897	0.129634	133.621	7.32652	0.296582	0.384627	0.434362	0.306076	0.269404
	KERVT	0.343195	0.208397	0.0278748	-3.76407	82.5918	-0.0104607	0.246284	0.741405	0.340203	0.670889
	KLMSN	0.272656	8.93433	0.0869111	-2.28656	70.8163	-0.00588215	0.254032	0.736827	0.338154	0.66138
	KNFRT	0.447658	10.3779	0.0970723	-1.85045	78.8367	-0.00440006	0.250815	0.735345	0.3416	0.6677
	KONYA	0.557746	-4.71621	-0.00331064	-5.30102	84.4081	-0.0189925	0.219623	0.749937	0.358966	0.722795
	KORDS	0.311579	-2.59867	0.00955956	-5.14486	81.5101	-0.0177348	0.252548	0.748679	0.333918	0.664173
	KRDMA	1.18848	-7.9636	-0.0325827	-5.14146	66.102	-0.0134667	0.252204	0.744411	0.332614	0.656695
	KRDMB	0.784211	-8.48129	-0.0335178	-5.53411	73.9183	-0.0182724	0.249732	0.749217	0.333824	0.664526
	KRDMD	0.710526	-8.60684	-0.0337067	-5.63986	78.755	-0.0192702	0.249248	0.750215	0.334057	0.66611
	KRSTL	0.682171	-1.07133	0.0143634	-4.06421	60.4285	-0.00755025	0.251213	0.738495	0.336665	0.659729
	KRTEK	0.815534	-0.363194	0.0191283	-3.74595	65.3877	-0.00646144	0.2543	0.737406	0.334197	0.652937
	KUTPO	4.32322	15.0673	0.0664136	19.0529	14.5714	0.0823351	0.320122	0.64861	0.303841	0.489966
	LUKSK	1.0929	-6.33966	-0.0292526	-4.58841	54.0612	-0.00227285	0.265134	0.733218	0.325025	0.627545
	MAKTK	0.894309	-2.92877	-0.0135706	-3.47709	36.1224	0.0156113	0.272379	0.715333	0.322883	0.603808
	MNDRS	1.72951	-114.336	-0.930643	-67.6411	61.7958	-0.0494191	0.220587	0.780364	0.336292	0.702979
	MRSHL	0.903541	6.54463	0.0443776	16.2055	71.7142	0.0292756	0.252572	0.701669	0.341693	0.632441
	NIBAS	0.65	-8.04852	-0.0185297	-36.5318	79.0611	-0.0453851	0.17614	0.77633	0.405571	0.857203
	NUHCM	0.654605	28.5484	0.212711	8.43306	59.5306	0.0134724	0.267512	0.717472	0.337177	0.638756
	OLMK	0.133333	-4.47001	0.00209974	-5.49199	115.612	-0.0272614	0.233919	0.758206	0.346256	0.70243
	OTKAR	0.443587	40.9222	0.298585	16.4396	75.755	0.0216848	0.270139	0.70926	0.340948	0.638733
	OYAKC	0.413174	-1.87159	0.0184053	-5.3648	98.1836	-0.0267357	0.213517	0.75768	0.363575	0.741495
	OYLUM	0.00636943	-1.53055	0.0274443	-5.83224	118.326	-0.0302549	0.235097	0.7612	0.346628	0.706436
	PARSN	0.641026	-3.29686	-0.00586564	-4.17059	57.3877	5.10028e-05	0.271094	0.730894	0.322092	0.618387
	PENGD	-0.476965	-21.2893	-0.088665	-11.8408	131.571	-0.0549688	0.221915	0.785914	0.347373	0.734172
	PETKM	0.409241	1.92823	0.0395083	-3.75005	74.9795	-0.011633	0.25102	0.742578	0.337223	0.665307
	PETUN	0.871569	1.96056	0.0367489	-3.61758	58.2653	-0.00691931	0.254816	0.737864	0.335082	0.655443
	PINSU	0.783537	-76.2122	-0.552604	4.78994	66.1428	-0.0255528	0.222379	0.756497	0.336385	0.678052
	PNSUT	0.48629	-3.54521	0.00429342	-5.35438	90.204	-0.0206891	0.24555	0.751634	0.338573	0.677935
	PRKAB	0.63125	1.71965	0.033744	-3.33576	75.0816	-0.00484688	0.246429	0.735792	0.341274	0.667425
	PRZMA	-0.0753138	-19.883	-0.0493178	-65.1623	130.694	-0.131004	0.149273	0.861949	0.428571	1
	RTALB	5.13684	79.7585	0.339962	87.3391	3.16326	0.246327	0.394548	0.484618	0.290292	0.286236
	SAMAT	0.900621	-6.29437	-0.0238153	-4.57573	54.8163	-0.00693702	0.250904	0.737882	0.334988	0.655249
	SANFM	0.232365	-2.76681	0.00934674	-4.63685	97.8775	-0.0186672	0.239627	0.749612	0.343276	0.686562
	SARKY	-0.0721649	0.986561	0.0394474	-5.35045	102.143	-0.0229876	0.243345	0.753932	0.342065	0.688344
	SASA	0.231471	3.16797	0.0539953	-3.7845	102.286	-0.0194471	0.237555	0.750392	0.34742	0.696862
	SAYAS	0.567669	9.02162	0.0683122	-1.16814	64.8571	0.0222957	0.253965	0.708649	0.342205	0.640965
	SEKUR	0.361169	-6.75342	-0.0165562	-5.71204	92.1428	-0.022729	0.244451	0.753674	0.338015	0.678806
	SELGD	1.02597	6.42336	0.0335687	8.48918	38.9796	0.0412607	0.334474	0.689684	0.286568	0.493719
	SILVR	1.55689	-3.25679	-0.0144996	2.50874	63.4693	0.0130617	0.248747	0.717883	0.339272	0.643982
	SKTAS	0.0666667	-121.907	-0.861267	-55.969	62.0407	-0.10261	0.206114	0.833555	0.333126	0.751765
	SNPAM	0.719027	0.10914	-0.00369463	-2.3482	29.7959	0.0377735	0.296401	0.693171	0.310359	0.551815
	TATGD	0.577287	6.27119	0.066415	-2.59934	66.5306	-0.00443917	0.251746	0.735384	0.338992	0.661777
	TBORG	0.176334	6.84972	0.0911501	-3.93059	106.898	-0.0301956	0.223075	0.76114	0.360875	0.738963
	TIRE	0.135135	2.13138	0.0481378	-4.21372	103.633	-0.0231775	0.233259	0.754122	0.350073	0.706862
	TMPOL	0.436538	5.90656	0.0656892	-2.7275	84.9795	-0.00752774	0.247261	0.738472	0.341879	0.671633
	TMSN	0.677419	-0.71831	0.0170424	-4.15255	61.2653	-0.00790188	0.259988	0.738847	0.3301	0.645082
	TOASO	0.610942	11.5448	0.0971991	-1.1583	63.8367	0.00554989	0.254286	0.725395	0.339737	0.652959
	TTRAK	0.980634	15.0129	0.106666	0.887986	46.6734	0.0234548	0.259425	0.70749	0.33876	0.631863
	TUCLK	0.315789	-6.84522	-0.0185776	-5.49142	89.9999	-0.0210124	0.246062	0.751957	0.336851	0.674335
	TUKAS	0.0488372	3.67697	0.0698153	-6.02223	113.082	-0.0390219	0.220609	0.769967	0.360549	0.747514
	TUPRS	0.18543	-9.10772	-0.0310605	-5.91263	108.122	-0.0259444	0.238422	0.756889	0.341227	0.689541
	ULKER	0.236641	14.9068	0.134545	-0.584859	94.4897	-0.00982347	0.24864	0.740768	0.344952	0.68108
	ULUUN	1.17907	-0.307226	0.018991	-3.64115	73.6122	-0.00445682	0.246043	0.735402	0.340808	0.665949
	USAK	0.354839	-2.92744	0.00297781	-4.44503	60.2652	-0.0100211	0.256003	0.740966	0.332055	0.651788
	VESBE	0.569839	13.8148	0.117327	-0.586103	75.1836	-0.000205786	0.253139	0.731151	0.341367	0.662749
	VESTL	0.540284	10.635	0.101464	-2.04451	84.2448	-0.00775604	0.252898	0.738701	0.339644	0.666762
	YATAS	0.625954	1.94645	0.035096	-3.26577	73.6734	-0.00478487	0.247893	0.73573	0.340063	0.664591
	YUNSA	0.751425	-5.1826	-0.0239721	-3.32665	61.1428	0.00370851	0.24797	0.727236	0.338061	0.651065

## Sheet: 2020 03
		2020/03	CODAS	COPRAS	ELC3	FUCA	MABAC	TOPSIS	S	R	Q	CODAS2	COPRAS2	ELC2	FUCA2	MABAC2	TOPSIS2	S2	R2	Q2			CODAS	COPRAS	ELC3	FUCA	MABAC	TOPSIS	S	R	Q
	ACSEL	-0.169545	-15.7092	0.00731593	-5.86187	78.2244	-0.0209824	0.503411	0.560762	0.365818	0.707396	-11.2645	0.0126486	-5.21006	36.6938	-0.0232886	0.490152	0.520043	0.372349	0.706283		CODAS2	0.857	-0.467	0.844	-0.603	0.722	0.669	-0.722	-0.001	-0.338
	ADEL	-0.364331	-7.89199	0.00377279	-1.72859	82.6938	-0.0041656	0.509416	0.543945	0.370532	0.701203	4.19971	0.00499048	1.59635	40.8571	0.006411	0.497671	0.490344	0.377148	0.691235			0	0	0	0	0	0	0	0.993	0.004
	AEFES	-0.253466	1.15665	-0.00346347	-5.95773	92.2448	-0.033343	0.494873	0.573123	0.397672	0.764218	0.650339	-0.00589069	-3.42561	46.0612	-0.0329574	0.479499	0.529712	0.404772	0.756859
	AFYON	-0.210191	10.7888	0.00193083	7.76332	36.7551	0.0344446	0.533664	0.505335	0.35607	0.649561	24.5711	0.00185187	8.12698	17.6531	0.0541305	0.522912	0.442624	0.362427	0.636909		COPRAS2	-0.432	0.984	-0.217	-0.07	-0.024	-0.025	0.024	-0.717	-0.416
	AKCNS	-0.298805	-6.93985	0.00471268	-4.01293	82.204	-0.0130368	0.506632	0.552816	0.369768	0.707019	-3.62637	0.00774137	-2.89748	39.8571	-0.0111551	0.493744	0.50791	0.37637	0.702904			0	0	0.071	0.563	0.845	0.839	0.845	0	0
	AKSA	-0.537226	-2.26129	0.00449175	-3.97256	88.4489	-0.0131427	0.505798	0.552922	0.37136	0.709459	-2.93517	0.00732542	-3.47683	43.5714	-0.0131898	0.492876	0.509945	0.377991	0.706556
	ALCAR	-0.351333	-13.4784	0.00410139	-4.30477	93.3469	-0.0175135	0.503483	0.557293	0.373526	0.716088	-3.91412	0.00633536	-1.75904	46.8367	-0.012469	0.490529	0.509224	0.380195	0.708997		ELC2	0.578	-0.28	0.91	-0.49	0.693	0.576	-0.693	-0.023	-0.351
	ALKA	0.0179211	-6.17083	0.00510017	-4.86708	55.3469	-0.0078362	0.514672	0.547616	0.360657	0.689464	-5.30368	0.00981428	-4.25303	25.7142	-0.00770427	0.501321	0.504459	0.367096	0.687943			0	0.019	0	0	0	0	0	0.853	0.003
	ALKIM	0.30167	3.67997	0.00832275	-4.1481	50.0203	0.00645784	0.523818	0.533322	0.346769	0.657715	-4.437	0.0158139	-5.4614	24.3265	0.000879319	0.511977	0.495875	0.35296	0.66273
	ALMAD	0.365854	51.1696	0.0377973	59.7953	15.0612	0.179985	0.65129	0.359794	0.204952	0.311939	31.2725	0.0642875	31.002	7.99999	0.190891	0.669692	0.305864	0.208611	0.331185		FUCA2	-0.599	-0.052	-0.595	0.994	-0.807	-0.827	0.807	0.659	0.809
	ARCLK	-0.350288	-2.68084	0.00240194	-3.87005	94.1428	-0.0157703	0.503494	0.55555	0.377986	0.721322	0.0525385	0.00343564	-2.19234	46.1632	-0.0127398	0.490325	0.509495	0.384735	0.715294			0	0.667	0	0	0	0	0	0	0
	ARSAN	-0.217877	2.62556	-0.00166181	-4.81192	90.6938	-0.0243588	0.499641	0.564138	0.389836	0.745585	1.75631	-0.00290803	-3.07551	44.6122	-0.0236452	0.484997	0.5204	0.396796	0.739399
	ASUZU	-0.304848	-3.12557	0.00295147	-3.72626	91.5713	-0.013699	0.504968	0.553479	0.375501	0.716023	-0.116012	0.00442032	-2.14609	45.0612	-0.0105693	0.491967	0.507324	0.382206	0.710324		MABAC2	0.634	-0.097	0.933	-0.791	0.969	0.9	-0.969	-0.402	-0.729
	ATEKS	-0.37636	0.193157	-0.00228627	-4.45989	90.8366	-0.0220398	0.50103	0.561819	0.389836	0.743769	3.48605	-0.00419122	-1.41088	43.7755	-0.0172121	0.486622	0.513967	0.396796	0.734742			0	0.423	0	0	0	0	0	0.001	0
	AVOD	-0.0698925	-5.89558	0.00895397	-5.29468	81.6326	-0.0186717	0.499874	0.558451	0.367347	0.707849	-9.9234	0.0144061	-5.9852	39.204	-0.0248587	0.487661	0.521613	0.373905	0.709511
	AYGAZ	-0.345794	-16.4923	0.00626482	-6.48134	96.3264	-0.0284655	0.498556	0.568245	0.372125	0.722591	-12.7946	0.0108332	-5.80001	47.2653	-0.0321245	0.484621	0.528879	0.378769	0.721307		TOPSIS2	0.604	0.019	0.781	-0.838	0.977	0.99	-0.977	-0.554	-0.833
	BAGFS	-0.3044	-0.823432	0.00316689	-5.13038	97.8162	-0.0245536	0.498057	0.564333	0.381044	0.732727	-4.85192	0.00501214	-4.66688	48.204	-0.0282964	0.484241	0.525051	0.387847	0.730738			0	0.878	0	0	0	0	0	0	0
	BAKAB	-0.077551	3.11608	0.00169543	-2.94047	67.9387	-0.0038246	0.512902	0.543604	0.371233	0.701973	4.3077	0.00292554	-1.47638	32.3673	0.000310933	0.499796	0.496444	0.377861	0.696609
	BANVT	-0.126548	-9.34805	0.00472926	-4.78829	79.4285	-0.0167763	0.506061	0.556556	0.369449	0.709476	-6.26445	0.00826816	-3.98522	36.6938	-0.0164252	0.492619	0.51318	0.376045	0.706283		S2	-0.634	0.097	-0.933	0.791	-0.969	-0.9	0.969	0.402	0.729
	BFREN	-0.359434	-93.5066	0.037842	-41.487	84.5509	-0.0589587	0.453368	0.598738	0.338359	0.696503	-54.5928	0.0579484	-24.4928	42.2653	-0.0668239	0.448333	0.563579	0.3444	0.700233			0	0.423	0	0	0	0	0	0.001	0
	BLCYT	0.430206	20.5036	0.00325709	-5.75568	49.9795	-0.00278728	0.514402	0.542567	0.366582	0.694278	1.95147	0.00685835	-7.62152	23.9796	-0.0126531	0.50102	0.509408	0.373127	0.699631
	BNTAS	0.15873	12.153	0.00196386	-1.9185	38.7755	0.0083477	0.521015	0.531432	0.364097	0.68188	8.35031	0.00379509	-1.38698	17.4898	0.0116239	0.508419	0.485131	0.370598	0.678659		R2	-0.025	-0.696	-0.234	0.649	-0.509	-0.511	0.509	1	0.865
	BOSSA	-0.133995	-2.16891	0.00548577	-5.83295	91.5101	-0.0219721	0.500941	0.561752	0.373017	0.718825	-8.27635	0.00942008	-6.20948	44.5306	-0.0282489	0.487315	0.525004	0.379677	0.719722			0.837	0	0.052	0	0	0	0	0	0
	BRISA	-0.242902	-6.72534	0.00520443	-3.31371	89.551	-0.0134742	0.501964	0.553254	0.3741	0.713773	-0.892623	0.00726322	-1.59197	44.7551	-0.00936026	0.490076	0.506115	0.380779	0.707531
	BRKO	-0.193548	10.0214	-0.0136809	-13.2323	73.5305	-0.0341417	0.494391	0.573921	0.421053	0.799445	15.9402	-0.0236993	-2.2021	36.2857	-0.02252	0.478551	0.519275	0.428571	0.78129		Q2	-0.34	-0.334	-0.674	0.834	-0.88	-0.835	0.88	0.801	0.982
	BRKSN	-0.0948905	5.11603	0.000823467	-1.12769	49.3469	0.00743931	0.519739	0.53234	0.367729	0.687965	10.71	0.00120916	1.45246	22.7347	0.0172121	0.507147	0.479543	0.374294	0.679582			0.004	0.005	0	0	0	0	0	0	0
	BRSAN	-0.350218	3.03499	-0.00147052	-3.47579	84.0611	-0.013588	0.50604	0.553368	0.383975	0.728476	5.81109	-0.00276329	-0.932158	41.0408	-0.00813032	0.492121	0.504885	0.39083	0.72015
	BTCIM	-0.362538	9.22439	-0.00586206	-1.13609	77.0816	-0.0066482	0.509431	0.546428	0.390983	0.733411	16.2538	-0.0105844	3.62769	38.102	0.0059282	0.495435	0.490827	0.397963	0.719561
	BUCIM	-0.497592	-2.61274	0.00201397	-3.75865	87.8775	-0.0126148	0.506977	0.552395	0.375374	0.714985	0.710894	0.00317364	-1.82267	42.8367	-0.00857373	0.493644	0.505329	0.382076	0.708705
	BURCE	-0.0946644	6.7981	-0.00605937	-4.31288	75.4081	-0.0209081	0.502311	0.560688	0.396971	0.753442	8.77043	-0.0103569	-0.475432	37.4694	-0.0144376	0.487298	0.511192	0.404059	0.742495
	BURVA	0.335736	129.616	0.0489657	122.023	14.2653	0.347091	0.783766	0.192688	0.0924537	0.0145783	66.2145	0.0919915	61.3081	7.14284	0.35691	0.860285	0.139845	0.0703585	0.0252004
	CASA	-0.0149095	78.4512	0.0905713	132.669	31.8571	0.362405	0.760747	0.177375	0.102285	0.0171344	34.07	0.154664	63.8262	15.2041	0.366083	0.847279	0.130671	0.056549	0
	CCOLA	-0.0956072	0.58753	0.00158793	-4.24895	85.0407	-0.0157571	0.505602	0.555537	0.377349	0.720369	-0.343162	0.00283729	-3.38097	41.0816	-0.0153812	0.491744	0.512136	0.384086	0.716334
	CELHA	0.0661538	18.9691	-0.00397101	2.39541	33.9591	0.0242903	0.533758	0.515489	0.36518	0.670996	22.3842	-0.0057824	5.7004	15.5918	0.0396147	0.520115	0.45714	0.371701	0.659879
	CEMAS	-0.506579	5.60618	0.00245285	4.68814	83.2653	0.0037715	0.505695	0.536008	0.379961	0.70894	17.1029	0.000499865	6.98296	41.551	0.0180429	0.495797	0.478712	0.386745	0.695714
	CEMTS	-0.327295	-34.2338	0.0076518	-14.7971	89.7346	-0.033354	0.496455	0.573134	0.369576	0.722648	-16.4178	0.0128816	-8.30444	43.3265	-0.0310073	0.482857	0.527762	0.376175	0.717013
	CIMSA	-0.303965	3.62553	-0.00307761	-3.71398	83.5509	-0.0170518	0.503616	0.556831	0.389645	0.739579	6.96967	-0.00561554	-0.566292	40.653	-0.0108396	0.489398	0.507594	0.396602	0.729868
	CMBTN	-0.309258	-5.87117	0.00373559	-3.74413	82.0611	-0.0111827	0.507985	0.550962	0.370723	0.706981	-1.12416	0.00608134	-2.02385	40.2244	-0.00748838	0.49504	0.504243	0.377342	0.701557
	CMENT	-0.280667	-0.25841	-0.00138486	-2.66954	87.5714	-0.0107162	0.507537	0.550496	0.382509	0.724058	7.26391	-0.00291278	0.76228	42.8775	-0.00158124	0.493989	0.498336	0.389339	0.713405
	CUSAN	-0.253918	-2.2178	0.00334544	-3.24656	78.6734	-0.00733188	0.509816	0.547112	0.370405	0.703494	1.15343	0.00531401	-1.57152	37.4898	-0.00299082	0.497085	0.499746	0.377018	0.697866
	DAGI	-0.24	0.550952	0.000447108	-4.27567	90.1019	-0.0182161	0.503696	0.557996	0.381554	0.728517	0.895432	0.000727742	-2.85479	43.7551	-0.0167558	0.489645	0.513511	0.388366	0.723082
	DERIM	-0.322129	-2.08182	0.00328813	-1.12833	71.4897	0.00099018	0.512132	0.538789	0.369768	0.696033	7.42757	0.00414663	1.89269	33.9592	0.0116372	0.500546	0.485118	0.37637	0.686406
	DESA	-0.235683	-7.92869	0.00679458	-4.59155	85.7346	-0.0167183	0.503221	0.556498	0.36843	0.707922	-7.30057	0.0111079	-4.26479	41.6938	-0.0186624	0.490558	0.515417	0.375008	0.706508
	DEVA	0.160178	6.83401	0.00365157	-2.82489	48.3469	0.000779646	0.516032	0.539	0.364543	0.688467	3.09575	0.00659174	-2.9273	22.2449	0.000868068	0.503384	0.495887	0.371052	0.687054
	DITAS	0.112971	13.491	0.00141913	-2.7371	45.0407	0.0102236	0.527109	0.529556	0.3583	0.671831	6.21531	0.00442472	-2.80522	21.6122	0.010944	0.513743	0.485811	0.364697	0.67122
	DMSAS	-0.281609	-5.70154	0.00408199	-4.62442	94.3468	-0.0185874	0.503246	0.558367	0.373909	0.717494	-5.0079	0.00679331	-3.87028	47.102	-0.0189958	0.489817	0.515751	0.380585	0.714245
	DOBUR	-0.438221	-31.0258	0.0137307	-3.57875	70.7142	-0.0149503	0.496025	0.55473	0.360785	0.695224	-8.88741	0.0198189	-0.0505611	34.1428	-0.00640978	0.487307	0.503165	0.367226	0.68718
	DOGUB	-0.197115	15.9568	0.0666927	80.6928	50.5306	0.25171	0.718656	0.288069	0.10391	0.106233	17.4496	0.11307	45.1422	25.8571	0.266769	0.76897	0.229986	0.105765	0.138035
	DOKTA	-0.71696	-266.748	0.125068	-136.3	93.9183	-0.276011	0.217956	0.815791	0.364989	0.905906	-169.785	0.176652	-67.8507	46.0204	-0.32467	0.231298	0.821425	0.371506	0.923304
	DURDO	0.205128	16.6357	0.000960808	-3.71647	49.4285	0.00492573	0.524313	0.534854	0.361167	0.680223	4.32654	0.00412783	-4.40665	23.3061	0.00099775	0.510365	0.495757	0.367615	0.682341
	DYOBY	-0.189796	-2.67607	0.00443545	-3.54808	81.2856	-0.00980985	0.507776	0.54959	0.369895	0.70468	-0.945649	0.00711454	-2.61407	38.7551	-0.00784395	0.495129	0.504599	0.376499	0.700682
	EGEEN	-0.144014	-25.9052	0.0125107	-9.3015	78.0407	-0.0250402	0.500369	0.56482	0.356771	0.697186	-19.9379	0.021341	-8.48423	38.5714	-0.0314434	0.487842	0.528198	0.363141	0.69981
	EGGUB	-0.172691	-6.35154	0.00541187	-3.6187	82.7346	-0.0110349	0.506309	0.550815	0.36913	0.704508	-2.81089	0.00848031	-2.45704	39.9387	-0.00854853	0.493968	0.505303	0.375721	0.700146
	EGPRO	-0.194653	-0.72709	0.00412077	-2.82607	70.9591	-0.00447602	0.510377	0.544256	0.368812	0.6989	2.3046	0.00632895	-1.41014	32.5714	-0.000201595	0.498149	0.496956	0.375397	0.693668
	EGSER	-0.137466	0.919471	0.000896238	-3.46586	76.7958	-0.0092446	0.509788	0.549024	0.37531	0.712251	3.23188	0.00157265	-1.61315	37.1836	-0.00498617	0.496246	0.501741	0.382011	0.706021
	EKIZ	1.44262	7.3927	-0.000147933	-6.23054	85.1223	-0.0196122	0.507336	0.559392	0.378305	0.724802	-2.12498	0.00154731	-6.5688	42.5918	-0.0265927	0.491931	0.523347	0.385059	0.725757
	EMKEL	-0.144654	9.15809	-0.00237996	-1.94024	67.755	-0.00264234	0.512391	0.542422	0.380917	0.715377	11.8163	-0.00434781	0.749218	33.5714	0.00564906	0.498865	0.491106	0.387718	0.705992
	EPLAS	-0.12	0.816908	0.00493185	1.7133	52.3469	0.0140909	0.517724	0.525689	0.363014	0.675779	13.004	0.00608454	5.12408	24.6326	0.0284611	0.507618	0.468294	0.369496	0.66499
	ERBOS	-0.351882	-7.97167	0.0057301	-4.63116	97.653	-0.019219	0.501454	0.558999	0.372252	0.715538	-6.61496	0.0091998	-4.06774	49.653	-0.0204094	0.488521	0.517164	0.378899	0.713002
	EREGL	-0.169248	-1.54852	0.000551061	-4.63964	97.5509	-0.0214443	0.501827	0.561224	0.382764	0.732837	-0.79837	0.0008703	-3.03506	47.7142	-0.020045	0.487642	0.5168	0.389598	0.727118
	ERSU	0.676329	79.7118	0.00953481	60.662	16.653	0.118518	0.592679	0.421261	0.294145	0.492074	42.0095	0.0180247	31.8026	8.5306	0.123458	0.58996	0.373297	0.299397	0.502013
	FMIZP	-0.196071	-31.4195	0.0227177	-28.1081	46.9183	0.00243203	0.556856	0.537348	0.264775	0.539527	-32.2079	0.0501496	-16.8416	24.5102	-0.00304585	0.54727	0.499801	0.269502	0.553404
	FORMT	-0.33	-2.25493	0.00389658	5.93146	56.1224	0.0162477	0.519663	0.523532	0.363397	0.674655	16.2131	0.00419121	7.38295	26.6122	0.0354245	0.509419	0.46133	0.369885	0.660472
	FRIGO	-0.300926	-12.0271	0.00892906	-6.45089	102.367	-0.0272291	0.494918	0.567009	0.371105	0.720114	-13.1214	0.0143763	-6.92959	51.0408	-0.0342798	0.482095	0.531035	0.377731	0.721473
	FROTO	-0.304446	-29.4201	0.012123	-7.88652	92.2244	-0.0336487	0.491819	0.573428	0.365372	0.716656	-20.7101	0.0197393	-7.39282	44.7551	-0.0392769	0.479209	0.536032	0.371895	0.717246
	GEDZA	0.14645	6.2251	0.00255123	-3.00009	53.6938	-0.00139522	0.515231	0.541175	0.367283	0.694224	3.32054	0.0048383	-2.75432	24.653	-0.000536932	0.502161	0.497292	0.37384	0.691819
	GENTS	-0.0913242	1.99538	0.00146698	-2.67882	66.8367	-0.0023845	0.513683	0.542164	0.371105	0.700656	5.46886	0.00239409	-0.630407	32.0816	0.00371464	0.500696	0.49304	0.377731	0.693971
	GEREL	-0.288401	4.55815	-0.000921735	8.68535	64.1224	0.0192713	0.523532	0.520508	0.369768	0.681716	22.9436	-0.00324635	7.99711	30.7347	0.0405862	0.511817	0.456169	0.37637	0.665451
	GOLTS	-0.373243	0.815671	0.00106643	-4.01042	91.0611	-0.0177175	0.502753	0.557497	0.38149	0.728033	1.07733	0.00143544	-2.75614	45.5306	-0.0163233	0.489063	0.513078	0.388301	0.722681
	GOODY	-0.153086	-21.6293	0.00733193	-9.09436	89.6734	-0.0336475	0.496958	0.573427	0.370341	0.72401	-17.422	0.0131013	-8.08677	42.1224	-0.0397569	0.482526	0.536512	0.376953	0.724392
	GUBRF	0.618363	69.1472	-0.0189631	26.8365	13.6735	0.076496	0.572889	0.463284	0.357918	0.619361
	HATEK	0.0320233	3.95813	-0.00371403	-5.2425	85.0203	-0.0264902	0.499781	0.56627	0.393722	0.753006
	HEKTS	0.250623	19.5764	0.006549	-0.830902	32.2857	0.0255473	0.53327	0.514232	0.344475	0.63937
	HURGZ	-0.210526	4.73411	-0.00230901	-2.74591	77.755	-0.00917239	0.508663	0.548952	0.383656	0.724546
	IHEVA	-0.322684	-42.2264	0.0122209	-18.959	78.4897	-0.0314155	0.496585	0.571195	0.359447	0.706139
	IHGZT	-0.265786	-24.7224	0.0152653	-6.82591	72.3265	-0.00102238	0.515616	0.540802	0.339315	0.652543
	ISDMR	-0.21598	-11.196	0.00401823	-5.02102	97.8979	-0.0224394	0.501226	0.562219	0.375374	0.72268
	JANTS	-0.0660377	-13.745	0.00741201	-6.73825	57.8162	-0.0139592	0.510594	0.553739	0.358873	0.691619
	KAPLM	-0.0432432	6.35969	0.00086712	0.231711	43.7755	0.0139229	0.523155	0.525857	0.365244	0.67921
	KARSN	-0.202532	1.50537	0.00294706	-2.68944	72.6938	-0.004143	0.510844	0.543923	0.370914	0.70175
	KARTN	-0.138497	-26.0268	0.00937646	-10.0321	73.6122	-0.0210757	0.504137	0.560855	0.360084	0.698984
	KATMR	-0.359375	-1.61522	-0.00489854	-7.09735	97.9999	-0.0392482	0.488609	0.579028	0.407292	0.78308
	KENT	0.0187713	-11.2346	0.019734	21.704	57	0.0435764	0.546148	0.496203	0.308798	0.572452
	KERVT	0.0368098	4.5305	0.00340338	-3.77542	59.9183	-0.00701236	0.511648	0.546792	0.368366	0.700226
	KLMSN	-0.42029	-21.8631	0.0104794	-11.7536	116.265	-0.0450155	0.483666	0.584795	0.376839	0.74253
	KNFRT	-0.0716113	3.94324	0.00375456	-2.63885	56.9387	-0.000273871	0.514309	0.540054	0.366072	0.691555
	KONYA	-0.345743	-41.9578	0.0220382	-8.68702	66.9999	0.00576587	0.519637	0.534014	0.321858	0.621393
	KORDS	-0.2737	-0.766101	0.00137437	-4.61159	96.0815	-0.0212093	0.501342	0.560989	0.381681	0.73105
	KRDMA	-0.279245	2.67763	-0.000188764	-3.65027	81.1632	-0.0134941	0.506408	0.553274	0.380789	0.723688
	KRDMB	-0.280303	2.5746	-0.000155259	-3.65935	82.4285	-0.0136504	0.506262	0.55343	0.380853	0.723905
	KRDMD	-0.285714	2.5746	-0.000155259	-3.65935	81.4285	-0.0136504	0.506262	0.55343	0.380853	0.723905
	KRSTL	-0.145695	1.15342	0.00130957	-2.62086	69.7754	-0.00278399	0.513437	0.542564	0.371615	0.701723
	KRTEK	-0.364198	-3.02719	0.000948587	-3.37475	95.2856	-0.0162062	0.501819	0.555986	0.383019	0.729112
	KUTPO	-0.00453172	2.33971	0.000709242	-4.13905	80.5305	-0.0139538	0.507555	0.553733	0.377349	0.718957
	LUKSK	-0.152778	1.64766	-0.00098301	-4.81567	90.6326	-0.0232548	0.500966	0.563034	0.386905	0.740383
	MAKTK	-0.345745	-23.8276	0.0115041	-4.60632	72.1224	-0.0110056	0.505552	0.550785	0.356261	0.68544
	MNDRS	-0.0687023	6.76184	0.00314512	-18.1419	81.7142	-0.0310256	0.50142	0.570805	0.376011	0.730347
	MRSHL	-0.0971813	-19.4696	0.0112013	-4.3625	77.9591	-0.0130571	0.503853	0.552837	0.358555	0.690441
	NIBAS	-0.0645161	61.7926	0.0899211	133.185	43.6326	0.358164	0.768453	0.181616	0.0907069	0.00332123
	NUHCM	-0.232323	-1.11589	0.00316621	-3.47729	83.8979	-0.0103613	0.507478	0.550141	0.372889	0.709543
	OLMK	-0.355096	35.176	-0.00428851	11.5215	15.2449	0.0505104	0.547351	0.489269	0.356452	0.637545
	OTKAR	-0.347799	-17.9214	0.012044	-16.581	89.6734	-0.0388726	0.490413	0.578652	0.366964	0.723105
	OYAKC	-0.153716	-32.4091	0.0202859	-6.74269	64.6122	0.00883833	0.526572	0.530941	0.318928	0.614649
	OYLUM	-0.383104	7.46868	0.00497131	-1.46926	50.4489	0.00855944	0.517536	0.53122	0.361931	0.678508
	PARSN	-0.309327	-2.95446	-0.002704	-5.02912	97.2448	-0.0310752	0.492395	0.570855	0.399265	0.764799
	PENGD	0.782609	24.3501	-0.00187461	-0.656727	30.7347	0.0189149	0.528888	0.520865	0.365308	0.675395
	PETKM	-0.204724	-0.762794	0.0026523	-4.48272	92.3264	-0.0184371	0.502943	0.558217	0.377604	0.722845
	PETUN	0.112323	3.60739	-0.000251357	-3.21147	70.2448	-0.00591995	0.51285	0.5457	0.374928	0.709082
	PINSU	0.413793	41.5385	-0.0113258	5.19607	28.1632	0.040756	0.547872	0.499024	0.366391	0.659892
	PNSUT	-0.0213102	4.47022	-0.000137118	-2.7468	67.3673	-0.00326437	0.513678	0.543044	0.374355	0.706154
	PRKAB	0.230769	4.44322	0.001803	-2.98571	50.755	0.00130929	0.518884	0.53847	0.365117	0.688901
	PRZMA	0.111628	99.0431	0.0515178	95.3903	14.0612	0.275138	0.719569	0.264642	0.133152	0.13116
	RTALB	1.4569	51.5018	0.000585215	8.11325	11.1224	0.0719185	0.565749	0.467861	0.330523	0.582405
	SAMAT	-0.100559	21.3732	-0.0169638	21.6175	56.3877	0.0902087	0.562881	0.449571	0.368302	0.62399
	SANFM	-0.036	-0.547626	0.00536631	-3.57745	68.7346	-0.00666275	0.510491	0.546442	0.365499	0.69571
	SARKY	0.00414079	-8.22684	0.0038063	-4.79869	76.5917	-0.0161725	0.507288	0.555952	0.37015	0.71004
	SASA	0.134541	12.0244	0.00729117	-7.32824	40.5101	-0.00160107	0.5154	0.541381	0.356962	0.679112
	SAYAS	0.1875	18.6107	-0.00167063	-1.00997	32.2244	0.0171368	0.529438	0.522643	0.363779	0.674525
	SEKUR	-0.106343	2.56647	0.000909116	-3.14719	74.3673	-0.00754913	0.510088	0.547329	0.375374	0.711018
	SELGD	-0.104651	-3.16391	-0.0108693	-25.6737	97.6325	-0.0662616	0.478463	0.606041	0.428571	0.835726
	SILVR	-0.226852	-3.35436	0.00177324	-0.619079	73.653	0.00185082	0.51501	0.537929	0.369768	0.695359
	SKTAS	-0.0377358	15.884	-0.000245298	-21.0484	81.653	-0.0328415	0.502461	0.572621	0.382	0.740632
	SNPAM	-0.0813008	5.03835	0.0125416	-1.14585	48.5306	0.0189032	0.526742	0.520876	0.337913	0.634863
	TATGD	0.00794913	5.16604	0.00169646	-2.76279	57.204	-0.000951166	0.515226	0.540731	0.369194	0.696705
	TBORG	0.0865546	2.25285	0.0148596	0.0189031	49.9591	0.0197631	0.531477	0.520017	0.32772	0.619104
	TIRE	0.519324	37.6244	-0.00365402	1.85869	16.8163	0.0471697	0.552012	0.49261	0.348361	0.628187
	TMPOL	-0.00383142	-0.23778	0.00910685	-11.9682	59.4081	-0.0189928	0.504719	0.558772	0.361422	0.699333
	TMSN	-0.322933	3.80283	-0.00251455	-2.92921	82.2856	-0.0121108	0.506194	0.551891	0.386396	0.730901
	TOASO	-0.387565	-17.2186	0.00832369	-6.15606	95.7958	-0.0273495	0.496934	0.567129	0.369768	0.718228
	TTRAK	-0.28231	-13.3507	0.0069284	-3.59162	83.102	-0.0129471	0.503175	0.552727	0.368812	0.705534
	TUCLK	0.0101266	6.81916	-0.00119391	-2.72373	68.0407	-0.00474604	0.512175	0.544526	0.378113	0.712877
	TUKAS	-0.303644	-59.1178	0.0332148	-22.8336	80.2652	-0.0353203	0.467287	0.5751	0.342118	0.683553
	TUPRS	-0.404574	-15.3425	0.00775549	-6.34809	104.204	-0.0291658	0.49557	0.568945	0.372316	0.723422
	ULKER	-0.121199	0.66923	0.00524461	-4.71635	69.3469	-0.0132712	0.506915	0.553051	0.368493	0.705317
	ULUUN	0.125654	-5.32327	0.00259156	-3.87422	69.9591	-0.00986713	0.510791	0.549647	0.37015	0.705102
	USAK	-0.266272	6.04942	-0.00133856	-3.15607	76.3673	-0.0103275	0.507776	0.550107	0.382446	0.723659
	VESBE	-0.250926	-14.197	0.0087281	-5.75964	89.9795	-0.0235225	0.498802	0.563302	0.367665	0.71212
	VESTL	-0.164025	3.45575	0.00143673	-2.72434	72.0203	-0.00427306	0.511632	0.544053	0.373208	0.705247
	YATAS	-0.286104	-16.0174	0.00845739	-5.0265	92.6326	-0.0221897	0.498487	0.561969	0.368812	0.712773
	YUNSA	-0.130823	-2.94244	0.00457803	-2.37586	67.2448	-0.00109646	0.51235	0.540876	0.366264	0.692482

## Sheet: 2019 12
		2019/12	CODAS	COPRAS	ELC3	FUCA	MABAC	TOPSIS	S	R	Q	CODAS2	COPRAS2	ELC2	FUCA2	MABAC2	TOPSIS2	S2	R2	Q2			CODAS	COPRAS	ELC3	FUCA	MABAC	TOPSIS	S	R	Q
	ACSEL	0.308008	0.501795	0.00879706	-2.34767	59.8571	0.00113168	0.218494	0.767214	0.379718	0.768003	-1.09515	0.00807201	-2.58786	31.2449	-0.00343368	0.103748	0.896118	0.417487	0.880619
	ADEL	0.321549	-8.12502	-0.0109694	-3.19422	67.9795	-0.0109233	0.204755	0.779269	0.379718	0.779986	-5.36766	-0.00437392	-5.96642	34.8571	-0.0258455	0.0749984	0.91853	0.417487	0.902717		CODAS2	0.999	0.99	0.963	-0.28	0.851	0.934	-0.851	0.074	-0.713
	AEFES	0.0548446	-2.05773	0.000909098	-2.78868	95.6734	-0.0093977	0.210986	0.777744	0.379718	0.778469	-2.35736	0.000886581	-3.0396	49.7346	-0.0178154	0.0911627	0.9105	0.417487	0.894799			0	0	0	0.019	0	0	0	0.54	0
	AFYON	0.424036	-7.06952	-0.00725586	-3.11883	49.6122	-0.0079285	0.208613	0.776274	0.377326	0.771772	-4.79718	-0.00120011	-5.41637	25.4489	-0.0219635	0.0786572	0.914648	0.414856	0.892261
	AKCNS	0.478645	-0.673987	0.00530113	-2.49978	60.4081	-0.00109853	0.216221	0.769444	0.379677	0.77013	-1.71989	0.00585732	-2.82705	30.653	-0.00750141	0.0982506	0.900186	0.417442	0.884516		COPRAS2	0.906	0.956	0.976	-0.529	0.98	0.996	-0.98	-0.143	-0.891
	AKSA	0.405128	-0.442092	0.00567934	-2.53347	68.5305	-0.00332671	0.215734	0.771673	0.379677	0.772345	-1.62609	0.00514774	-2.74074	33.7959	-0.00940792	0.0985396	0.902093	0.417442	0.886396			0	0	0	0	0	0	0	0.237	0
	ALCAR	0.586462	-0.79871	0.00550602	-2.4826	44.4489	-0.000143533	0.216636	0.768489	0.379289	0.76833	-1.74827	0.00638843	-2.85533	22.5306	-0.00665024	0.0982765	0.899335	0.417015	0.882601
	ALKA	0.371007	1.80953	0.0126323	-2.02649	62.4285	0.00691872	0.222301	0.761427	0.379841	0.762519	-0.452089	0.0117875	-2.30087	33.7755	0.00424213	0.110392	0.888443	0.417622	0.87339		ELC2	0.994	0.969	0.929	-0.213	0.795	0.889	-0.795	0.114	-0.652
	ALKIM	0.448224	3.39069	0.0166882	-1.61687	43.6122	0.0132219	0.22653	0.755124	0.379596	0.755716	0.555966	0.0158749	-1.96057	21.8367	0.0123736	0.11701	0.880311	0.417352	0.864693			0	0	0	0.077	0	0	0	0.349	0
	ALMAD	-0.0681818	8.62448	0.0208238	0.69505	104.673	-0.000844405	0.22474	0.76919	0.385648	0.782949	3.03922	0.0107726	4.94719	52.6734	0.00393337	0.130545	0.888751	0.424007	0.889782
	ARCLK	0.0945378	-1.12009	0.00299794	-2.68007	107.041	-0.00738704	0.212758	0.775733	0.380025	0.777142	-1.93391	0.00242611	-2.86346	55.551	-0.0146111	0.0947757	0.907296	0.417824	0.892489		FUCA2	-0.256	-0.356	-0.409	0.999	-0.618	-0.491	0.618	0.827	0.739
	ARSAN	0.479339	-0.772963	0.00456461	-2.62589	68.3877	-0.00560797	0.214345	0.773954	0.37933	0.773852	-1.79431	0.0038928	-2.80892	35.3265	-0.0123487	0.0963789	0.905033	0.41706	0.888333			0.033	0.003	0	0	0	0	0	0	0
	ASUZU	0.294681	1.43115	0.0106878	-2.30201	80.0407	0.000348538	0.21941	0.767997	0.380005	0.769408	-0.710215	0.00846867	-2.33802	41.2245	-0.00299809	0.106657	0.895683	0.417802	0.880982
	ATEKS	0.420185	-1.44417	0.00275395	-2.68977	69.9795	-0.00624504	0.213074	0.774591	0.379309	0.77444	-2.15962	0.0029289	-2.97078	36.1224	-0.0139706	0.0936045	0.906655	0.417037	0.889875		MABAC2	0.904	0.95	0.981	-0.526	0.983	0.993	-0.983	-0.128	-0.885
	AVOD	0.120482	-1.03983	0.00332571	-2.67643	101.877	-0.00728211	0.213181	0.775628	0.379964	0.776904	-1.87906	0.00262322	-2.83284	53.2653	-0.0143499	0.095157	0.907035	0.417757	0.892062			0	0	0	0	0	0	0	0.29	0
	AYGAZ	0.092766	-0.66538	0.00454791	-2.56789	98.4285	-0.00438118	0.214419	0.772727	0.380066	0.774244	-1.71838	0.00418393	-2.80429	50.6122	-0.0108805	0.0974215	0.903565	0.417869	0.888924
	BAGFS	0.640976	-2.49846	0.000670312	-2.74746	59.7754	-0.00635357	0.212445	0.774699	0.379187	0.77428	-2.61547	0.00212018	-3.14322	29.9387	-0.0152695	0.090447	0.907954	0.416902	0.890816		TOPSIS2	0.981	0.994	0.987	-0.354	0.9	0.968	-0.9	0.013	-0.765
	BAKAB	0.233221	-1.51949	0.00216566	-2.69141	89.6734	-0.00657223	0.212678	0.774918	0.379841	0.775929	-2.18362	0.00245943	-2.97887	47.3061	-0.0143751	0.0932898	0.90706	0.417622	0.891747			0	0	0	0.003	0	0	0	0.913	0
	BANVT	0.294979	-5.26067	-0.00643846	-2.99516	115.775	-0.0131825	0.2058	0.781528	0.380086	0.783037	-3.9101	-0.00356007	-3.74523	59.204	-0.0253293	0.0803268	0.918014	0.417892	0.903227
	BFREN	0.483623	3.79586	0.0191907	-1.37633	18.2653	0.0237579	0.233534	0.744588	0.379125	0.744213	0.895286	0.0211608	-2.1246	9.75509	0.0236258	0.12243	0.869059	0.416835	0.852295		S2	-0.904	-0.95	-0.981	0.526	-0.983	-0.993	0.983	0.128	0.885
	BLCYT	0.594891	8.97883	0.0254354	-0.84346	37.5102	0.0158133	0.231691	0.752533	0.379248	0.752379	3.15083	0.0204033	1.2349	19.551	0.0195364	0.128796	0.873148	0.41697	0.856667			0	0	0	0	0	0	0	0.29	0
	BNTAS	0.3125	0.285028	0.00886185	-2.22798	49.204	0.00381714	0.219259	0.764529	0.379289	0.764393	-1.16897	0.00920847	-2.63583	26.3061	-0.00104132	0.104204	0.893726	0.417015	0.87707
	BOSSA	0.722222	1.93269	0.0127325	-2.20451	44.4898	0.00286802	0.221611	0.765478	0.379371	0.765516	-0.456269	0.0104071	-2.21631	22.6122	0.000264312	0.109049	0.89242	0.417105	0.87601		R2	0.083	-0.006	-0.028	0.823	-0.221	-0.114	0.221	1	0.412
	BRISA	0.533871	0.468994	0.0093079	-2.38272	38.653	0.00216422	0.220062	0.766182	0.379105	0.765633	-1.14806	0.00886454	-2.58697	18.9592	-0.00240861	0.103866	0.895093	0.416812	0.877909			0.493	0.959	0.815	0	0.066	0.347	0.066	*	0
	BRKO	0.0689655	-4.87507	-0.00349019	-3.02933	74.2244	-0.0120486	0.207964	0.780394	0.376978	0.775106	-3.75828	-0.0012929	-3.69464	37.653	-0.0239691	0.0814943	0.916654	0.414474	0.893276
	BRKSN	0.419689	-1.78272	0.0019768	-2.6835	80.8162	-0.00588881	0.212908	0.774235	0.3798	0.775161	-2.24768	0.0026651	-3.01651	41.0816	-0.0138449	0.092999	0.90653	0.417577	0.891111		Q2	-0.812	-0.881	-0.906	0.657	-0.98	-0.954	0.98	0.293	0.971
	BRSAN	0.212924	-1.66399	0.00181527	-2.74711	85.4489	-0.00815362	0.211961	0.776499	0.379514	0.776785	-2.25187	0.00177578	-2.99536	44.2449	-0.0162165	0.092321	0.908901	0.417262	0.892656			0	0	0	0	0	0	0	0.014	0
	BTCIM	0.263359	-13.6572	-0.0215361	-5.7076	72.102	-0.0235141	0.194888	0.79186	0.378839	0.790577	-8.25746	-0.0132387	-11.3314	36.6938	-0.0440607	0.0572104	0.936745	0.41652	0.918241
	BUCIM	0.253521	-1.19575	0.0033334	-2.63652	79.2244	-0.00523146	0.213718	0.773577	0.379739	0.774373	-1.95914	0.00346031	-2.90712	40.8571	-0.0124979	0.0950203	0.905183	0.417509	0.889613
	BURCE	0.516971	-0.319417	0.00439882	-2.64838	112.653	-0.00861416	0.212975	0.77696	0.380577	0.779571	-1.54031	0.00237274	-2.69685	57.3877	-0.0147663	0.09782	0.907451	0.418431	0.894172
	BURVA	1.22706	2.71557	0.0209627	1.25835	15.3673	0.0347238	0.241339	0.733622	0.375567	0.725524	0.405241	0.0269455	1.10457	8.65305	0.0335197	0.128791	0.859165	0.412923	0.832684
	CASA	0.802303	98.2241	0.408553	136.563	33.5714	0.378323	0.650063	0.390023	0.200161	0	53.809	0.391625	66.5732	16.9184	0.410914	0.602292	0.48177	0.230121	0
	CCOLA	0.14905	-2.31865	0.000199598	-2.78149	96.1019	-0.00857146	0.210955	0.776917	0.379841	0.777917	-2.56711	0.000906788	-3.10942	50.3877	-0.0173672	0.0902155	0.910052	0.417622	0.894697
	CELHA	0.463964	-14.4606	-0.02444	-8.48012	84.0407	-0.0192491	0.196385	0.787595	0.379882	0.78862	-8.40235	-0.0128995	-13.0847	43.9999	-0.0411373	0.0603575	0.933822	0.417667	0.918248
	CEMAS	0.1875	-23.5685	-0.0425084	-20.6618	66.1019	-0.0358008	0.181201	0.804147	0.379227	0.803641	-12.0233	-0.0263275	-14.2725	32.8163	-0.0671898	0.0437256	0.959875	0.416947	0.942122
	CEMTS	0.462898	0.128825	0.00874516	-2.06655	48.6938	0.00689925	0.220408	0.761447	0.379514	0.761822	-1.21129	0.0103114	-2.66451	24.4694	0.00192329	0.105146	0.890761	0.417262	0.87477
	CIMSA	0.217158	-2.84204	-0.000726063	-2.839	75.0203	-0.00946347	0.210224	0.777809	0.379227	0.77746	-2.8312	0.000328055	-3.20026	38.7142	-0.0189951	0.0880731	0.91168	0.416947	0.894603
	CMBTN	0.392038	-1.13646	0.00341237	-2.63002	84.9999	-0.0052547	0.214002	0.773601	0.379902	0.774754	-1.93424	0.00346411	-2.87639	44.1224	-0.0123975	0.0952853	0.905082	0.417689	0.889967
	CMENT	0.279863	-2.45291	0.000831818	-2.75539	59.0408	-0.00682087	0.211946	0.775167	0.379003	0.774341	-2.59786	0.00201623	-3.1497	30.204	-0.0157161	0.0903638	0.908401	0.4167	0.890746
	CUSAN	0.345992	-2.09112	0.00124453	-2.6945	77.8162	-0.00562278	0.212535	0.773969	0.379759	0.774807	-2.36695	0.00248229	-3.09276	40	-0.0140185	0.0919532	0.906703	0.417532	0.891169
	DAGI	0.351351	-0.997486	0.00395408	-2.6305	76.755	-0.00549755	0.214024	0.773843	0.379636	0.774413	-1.85418	0.00362808	-2.84521	38.5918	-0.0124493	0.0957981	0.905134	0.417397	0.889282
	DERIM	0.898936	3.68968	0.0148664	-2.01361	81.4693	6.47674e-05	0.221253	0.768281	0.37982	0.769287	0.425062	0.0100188	-1.56214	42.8571	-0.00104329	0.113267	0.893728	0.417599	0.878545
	DESA	0.860656	-0.223355	0.00728907	-2.40831	47.2857	0.00209984	0.218775	0.766246	0.379514	0.766593	-1.49773	0.00794273	-2.72801	24.0408	-0.00341728	0.101363	0.896102	0.417262	0.880036
	DEVA	0.284286	1.11209	0.00964583	-2.36961	82.9183	-0.000928431	0.218445	0.769274	0.379984	0.770633	-0.884333	0.00756664	-2.41881	42.9183	-0.00479909	0.105021	0.897484	0.417779	0.882701
	DITAS	0.686067	-3.95366	-0.00211298	-2.72216	50.7142	-0.00146604	0.213534	0.769812	0.379371	0.769824	-3.15454	0.00290912	-3.71184	26.6326	-0.0120715	0.0888911	0.904756	0.417105	0.888173
	DMSAS	0.386454	-0.10253	0.00651331	-2.47739	80.1428	-0.00219757	0.216416	0.770543	0.379943	0.771805	-1.43349	0.00584988	-2.68755	41.653	-0.00775969	0.100189	0.900444	0.417734	0.885507
	DOBUR	0.873457	-1.72002	0.00493587	-2.25647	31.3061	0.0107069	0.222493	0.757639	0.378859	0.756605	-2.03653	0.0105528	-3.17119	17.2041	0.0032045	0.102203	0.88948	0.416543	0.871694
	DOGUB	0.368421	-1.97231	0.00362408	-2.75458	56.9387	-0.00555662	0.214136	0.773902	0.376999	0.768698	-2.33139	0.00404601	-3.06221	28.3673	-0.0138334	0.0925363	0.906518	0.414497	0.883339
	DOKTA	0.787608	89.7872	0.168585	135.116	10.2857	0.260747	0.423235	0.507599	0.377571	0.505234	45.2628	0.173762	66.9079	6.12244	0.331786	0.388231	0.560898	0.415126	0.544145
	DURDO	0.413897	-1.11024	0.00437436	-2.5475	57.4693	-0.000766451	0.216373	0.769112	0.379534	0.769487	-1.90524	0.00568077	-2.92527	29.653	-0.00774842	0.0969145	0.900433	0.417285	0.884363
	DYOBY	0.272727	-3.3548	-0.00271778	-2.88007	114.082	-0.0109472	0.208387	0.779293	0.380086	0.780815	-3.03516	-0.00123414	-3.28833	58.7346	-0.0211446	0.0861177	0.913829	0.417892	0.899101
	EGEEN	0.229873	0.349181	0.00833695	-2.33352	63.8163	0.00153287	0.218422	0.766813	0.37982	0.767828	-1.17723	0.00802611	-2.61944	33.0408	-0.003262	0.103249	0.895947	0.417599	0.880733
	EGGUB	0.402817	-1.39192	0.00203742	-2.77939	86.9183	-0.00919961	0.212642	0.777545	0.379882	0.778631	-2.07731	0.00142956	-2.91346	45.5714	-0.0169048	0.0934658	0.90959	0.417667	0.894354
	EGPRO	0.277481	0.173754	0.00729032	-2.46889	80.1836	-0.00234215	0.216899	0.770688	0.379923	0.771904	-1.2809	0.00611296	-2.62475	40.653	-0.00747143	0.101289	0.900156	0.417712	0.885166
	EGSER	0.204545	-0.149653	0.00629102	-2.53267	75.5714	-0.00397201	0.215591	0.772318	0.379677	0.772987	-1.46015	0.0051213	-2.69086	38.4694	-0.00969024	0.0995234	0.902375	0.417442	0.886674
	EKIZ	0.452381	35.802	0.0804797	20.4313	88.2448	0.0450102	0.269361	0.723336	0.380025	0.725057	16.7469	0.0532902	10.7292	45.8979	0.0781685	0.207018	0.814516	0.417824	0.801009
	EMKEL	0.204545	0.874141	0.00931257	-2.4458	71.6938	-0.00310027	0.217579	0.771446	0.379452	0.771628	-0.964467	0.00670483	-2.43218	37.5714	-0.00728119	0.103928	0.899966	0.417195	0.883676
	EPLAS	1.36295	-0.892457	0.00675044	-2.37753	30.8163	0.00781855	0.221707	0.760527	0.378696	0.759118	-1.73112	0.0101692	-2.99459	16.7551	0.00138668	0.102183	0.891298	0.416363	0.873034
	ERBOS	0.27514	-1.37553	0.0022718	-2.74565	90.7346	-0.00830675	0.212484	0.776653	0.37982	0.777609	-2.0659	0.00185196	-2.90895	46.5714	-0.0159659	0.093379	0.908651	0.417599	0.893259
	EREGL	0.319708	-1.82252	0.00202589	-2.71443	73.4489	-0.00671006	0.212546	0.775056	0.379412	0.775126	-2.2696	0.00244038	-3.02341	38.2449	-0.0147716	0.0925948	0.907456	0.41715	0.890948
	ERSU	0.533333	-4.21266	0.00121346	-2.75227	39.0204	-0.00120579	0.214217	0.769552	0.374054	0.757927	-3.33074	0.00537214	-3.82183	19.7347	-0.0123328	0.0876514	0.905018	0.411259	0.873702
	FMIZP	1.71826	42.7177	0.0745424	132.38	4.38775	0.179832	0.342814	0.588514	0.373359	0.576446	22.8579	0.104268	66.8718	2.97959	0.199993	0.289473	0.692692	0.410495	0.662424
	FORMT	-0.566474	-26.1573	-0.0527116	-15.6568	138.163	-0.0651738	0.163448	0.83352	0.3898	0.855982	-14.4489	-0.0440283	-15.0741	69.8367	-0.0961872	0.0178172	0.988872	0.428571	1
	FRIGO	0.62	2.15481	0.013043	-2.21004	52.8367	0.00181179	0.221728	0.766534	0.379432	0.7667	-0.31676	0.010124	-2.1085	27.1632	-0.000533375	0.109673	0.893218	0.417172	0.876966
	FROTO	0.192761	5.72861	0.0188126	-1.65867	70.7346	0.00880878	0.226705	0.759537	0.380229	0.761491	1.47223	0.0149272	-1.05875	36.3061	0.00965918	0.119286	0.883026	0.418049	0.869125
	GEDZA	0.134228	-0.310147	0.00547945	-2.5904	96.7142	-0.00600122	0.214643	0.774347	0.379902	0.775496	-1.57168	0.00397567	-2.69231	51.2449	-0.0119675	0.0984666	0.904652	0.417689	0.889543
	GENTS	0.510345	-2.09072	0.0017851	-2.63082	58.7754	-0.00323076	0.213596	0.771577	0.379452	0.771757	-2.34915	0.00368331	-3.1161	29.6326	-0.0115803	0.0928308	0.904265	0.417195	0.887915
	GEREL	0.386957	-3.54783	-0.00194092	-2.81128	60.3264	-0.00728356	0.210829	0.775629	0.379268	0.775383	-3.1117	0.000713905	-3.3608	30.3469	-0.0175653	0.0867515	0.91025	0.416992	0.893306
	GOLTS	0.344671	-0.779621	0.00416966	-2.62823	84.9795	-0.00603787	0.214009	0.774384	0.379759	0.775219	-1.79653	0.00348056	-2.80366	44.4693	-0.0127887	0.0962436	0.905473	0.417532	0.889956
	GOODY	0.41115	11.2349	0.0292968	0.426521	81.7755	0.0170004	0.234038	0.751345	0.380025	0.7529	4.25497	0.0222175	4.11169	43.2449	0.0231432	0.135385	0.869542	0.417824	0.855264
	GUBRF	0.588752	-10.0699	-0.0154485	-4.77292	61.3468	-0.00712023	0.206867	0.775466	0.379473	0.775668
	HATEK	0.671533	2.67136	0.0135082	-2.11307	88.4081	0.000891472	0.220928	0.767454	0.379984	0.768824
	HEKTS	-0.491439	-5.3736	-0.00639344	-2.97983	99.0203	-0.0123854	0.205856	0.780731	0.379902	0.781842
	HURGZ	0.425	-0.138274	0.00681236	-2.51164	55.3061	-0.00287295	0.216245	0.771219	0.379227	0.770909
	IHEVA	0.993631	1.91901	0.0182771	3.22089	16.9592	0.0265269	0.23285	0.741819	0.376017	0.734657
	IHGZT	1.724	7.72149	0.0296212	15.8026	8.44897	0.0448338	0.245885	0.723512	0.373236	0.710371
	ISDMR	0.302439	-1.34663	0.00296897	-2.64775	71.3469	-0.00507586	0.213544	0.773422	0.379596	0.773905
	JANTS	0.355814	-0.101932	0.00736967	-2.33238	60.2857	0.00208555	0.21818	0.76626	0.37978	0.767189
	KAPLM	0.206522	0.671787	0.00852469	-2.42525	87.7958	-0.00180166	0.217649	0.770147	0.380066	0.77168
	KARSN	0.362069	-1.83373	0.00298604	-2.61931	44.4897	-0.00217486	0.215053	0.770521	0.379064	0.769857
	KARTN	0.151506	0.171872	0.0073838	-2.37473	88.0816	7.35231e-05	0.217355	0.768272	0.380189	0.770084
	KATMR	0.226837	-10.3608	-0.0148967	-3.82696	59.2448	-0.0164048	0.201189	0.784751	0.378921	0.783689
	KENT	0.473596	1.66841	0.0162057	-0.727524	20.653	0.0304667	0.235614	0.737879	0.378798	0.736828
	KERVT	0.347107	-0.246815	0.00752	-2.44412	34.2653	0.000319843	0.217938	0.768026	0.378737	0.766661
	KLMSN	1.02198	-0.34824	0.00692039	-2.44577	48.8979	0.00200065	0.218951	0.766345	0.379432	0.766512
	KNFRT	-0.802025	-4.57238	-0.00673351	-3.46516	126.428	-0.0212516	0.204165	0.789597	0.380332	0.791596
	KONYA	0.267757	-0.993245	0.00480866	-2.42251	65.1428	0.00146615	0.216896	0.76688	0.379841	0.767939
	KORDS	0.0307329	-0.854161	0.00351099	-2.67851	104	-0.00794129	0.212869	0.776287	0.379923	0.777469
	KRDMA	0.226852	-3.47419	-0.00239165	-2.88849	84.306	-0.0106478	0.208993	0.778994	0.379452	0.77913
	KRDMB	0.222222	-3.47419	-0.00239165	-2.88849	83.306	-0.0106478	0.208993	0.778994	0.379452	0.77913
	KRDMD	0.192825	-3.49063	-0.00249423	-2.89462	86.9183	-0.010863	0.208857	0.779209	0.379493	0.779434
	KRSTL	0.247934	-1.5019	0.00276984	-2.63332	70.5101	-0.00421084	0.213616	0.772557	0.379596	0.773045
	KRTEK	0.628141	-7.40179	-0.00911592	-3.14088	57.7142	-0.0125711	0.205511	0.780917	0.378941	0.779923
	KUTPO	0.2282	0.132932	0.00706236	-2.50275	80.1836	-0.00347343	0.216154	0.771819	0.37982	0.772804
	LUKSK	0.411765	-1.28544	0.00355903	-2.65908	56.6938	-0.0052517	0.213867	0.773598	0.379023	0.772826
	MAKTK	0.27027	-3.70753	-0.0049981	-3.02356	130.102	-0.0161854	0.205611	0.784531	0.381252	0.788574
	MNDRS	0.597561	-10.1263	-0.0150509	-3.78029	75.5509	-0.0150682	0.201668	0.783414	0.379718	0.784106
	MRSHL	0.51885	5.06969	0.0186885	-1.66302	37.2653	0.0141426	0.228572	0.754203	0.379616	0.754846
	NIBAS	-0.366053	-5.53224	-0.0669143	-57.9407	121.714	-0.124674	0.166253	0.89302	0.428571	1
	NUHCM	0.609756	0.0668305	0.00830263	-2.3377	35.2041	0.00241196	0.218804	0.765934	0.379105	0.765387
	OLMK	0.539216	-9.15467	-0.0131205	-3.46033	76.5917	-0.0136918	0.203144	0.782038	0.379739	0.782783
	OTKAR	0.177778	0.358268	0.00810232	-2.43789	61.551	-0.00124855	0.217738	0.769594	0.379636	0.77019
	OYAKC	0.476309	1.63626	0.013269	-1.85382	23.4898	0.0118585	0.224558	0.756487	0.379064	0.755907
	OYLUM	1.40094	-0.690346	0.00718462	-2.41334	29	0.00516532	0.22015	0.763181	0.378573	0.761486
	PARSN	0.32967	-4.25707	-0.00439676	-2.95654	101.531	-0.0126066	0.207087	0.780952	0.37978	0.781794
	PENGD	0.254545	-0.020852	0.00210152	-3.3552	116.816	-0.0211024	0.207771	0.789448	0.381804	0.79467
	PETKM	0.0554017	-1.23551	0.00263848	-2.70168	106.143	-0.00789948	0.212474	0.776245	0.380005	0.777607
	PETUN	0.358519	-1.31973	0.00265946	-2.67245	91.6122	-0.00639372	0.212833	0.77474	0.379882	0.775841
	PINSU	0.536424	-14.2202	-0.0236048	-6.60242	101.184	-0.0232628	0.19406	0.791609	0.379984	0.792834
	PNSUT	0.395374	-1.23882	0.00288031	-2.66798	94.5509	-0.00650098	0.21298	0.774847	0.379923	0.776038
	PRKAB	0.140351	-0.563571	0.00518069	-2.53611	77.755	-0.00328667	0.2154	0.771633	0.379902	0.772798
	PRZMA	-0.0732759	-1.87202	-0.00993952	-2.71221	109.449	-0.01907	0.202911	0.787416	0.392478	0.816017
	RTALB	0.681159	-3.00824	0.000457903	-3.40496	61.4285	-0.0145536	0.210576	0.782899	0.375935	0.775313
	SAMAT	0.612613	-64.1944	-0.147501	-26.4536	73.204	-0.0963049	0.144987	0.864651	0.379616	0.864635
	SANFM	1.28311	7.1524	0.0220286	-1.50629	29.2653	0.0157395	0.231459	0.752606	0.37933	0.752631
	SARKY	0.33795	-1.38502	0.00270026	-2.61999	88.5305	-0.00422422	0.213779	0.77257	0.380025	0.773998
	SASA	0.211599	-0.785867	0.00401509	-2.63569	92.8775	-0.00617047	0.214025	0.774516	0.379923	0.775709
	SAYAS	0.882353	-6.92041	-0.00845873	-3.05624	45.0612	-0.0029235	0.210156	0.771269	0.379309	0.771139
	SEKUR	0.763158	-2.00697	0.00186107	-2.68092	61.102	-0.00498472	0.213225	0.773331	0.379391	0.773367
	SELGD	0.0617284	2.93512	0.0126396	-2.12748	105.98	-0.00262302	0.219374	0.770969	0.380802	0.774108
	SILVR	0.553957	-5.38256	-0.00602908	-2.88392	87.7754	-0.00790297	0.208531	0.776249	0.380045	0.7777
	SKTAS	0.577381	-10.0856	-0.0145293	-3.70308	65.5305	-0.0161873	0.201425	0.784533	0.379268	0.784234
	SNPAM	0.333333	3.24344	0.0152322	-1.98134	47.8571	0.00563392	0.223441	0.762712	0.379575	0.763214
	TATGD	0.200382	-0.221586	0.00626696	-2.48316	82.9795	-0.00224393	0.21611	0.77059	0.379943	0.771851
	TBORG	0.406619	2.32159	0.0137841	-2.04971	51.653	0.00617154	0.222922	0.762174	0.379759	0.763083
	TIRE	1.49398	-0.676724	0.0071521	-2.32241	35.102	0.00797895	0.221692	0.760367	0.379146	0.759943
	TMPOL	0.422343	3.31206	0.0153005	-2.00166	45.3061	0.00508225	0.223618	0.763264	0.379493	0.763583
	TMSN	0.335417	-2.3292	-0.00110867	-2.84557	124.286	-0.0117066	0.209168	0.780052	0.380925	0.783406
	TOASO	0.324458	2.10769	0.0127467	-2.16232	66.3265	0.00312909	0.221545	0.765217	0.379923	0.766465
	TTRAK	0.281221	2.14349	0.0127686	-2.14691	74.6122	0.00345687	0.221647	0.764889	0.380086	0.766497
	TUCLK	0.39576	-3.58029	-0.00225806	-2.86003	69.5713	-0.009444	0.209598	0.77779	0.379289	0.777575
	TUKAS	1.10751	5.13071	0.0257354	12.218	13.4694	0.0468461	0.250445	0.7215	0.376099	0.714638
	TUPRS	-0.116376	-1.45538	0.00140636	-2.77402	115.531	-0.0102809	0.21075	0.778627	0.380229	0.780467
	ULKER	0.137913	-0.572946	0.00517976	-2.61734	68.1836	-0.00588506	0.214491	0.774231	0.379248	0.773948
	ULUUN	0.33101	-1.19676	0.00310851	-2.63356	95.5101	-0.00533994	0.213569	0.773686	0.380025	0.775107
	USAK	0.251852	-1.30473	0.00251094	-2.69355	101.49	-0.00733685	0.212591	0.775683	0.379984	0.777003
	VESBE	0.424802	0.566353	0.00872507	-2.37628	67.6734	0.000480558	0.218588	0.767865	0.379902	0.769053
	VESTL	0.259481	0.0654591	0.00660581	-2.52214	94.755	-0.00420168	0.215806	0.772548	0.380025	0.773976
	YATAS	0.152276	-0.0697697	0.00624135	-2.50829	94.9999	-0.00359828	0.215815	0.771944	0.380189	0.773734
	YUNSA	0.966862	1.02286	0.0113586	-2.17327	40.6122	0.00889313	0.223528	0.759453	0.379575	0.759974

[truncated: 6 more sheets: 2019 09, 2019 06, 2019 03, MCDM RESULTS, RR Results, CRITIC and SWARA comp ]
