# Supplementary material for: Proposal for an objective binary benchmarking framework that validates each other for comparing MCDM methods through data analytics
Source: PeerJ Comput Sci. 2023 Apr 25;9:e1350. doi: 10.7717/peerj-cs.1350 (PMC10159627; doi:10.7717/peerj-cs.1350)
Supplement: Supplemental Information 2 [file peerj-cs-09-1350-s002.xlsx]

## Sheet: MATRIS
	2021/06						2021/03					2020/12					2020/09					2020/06					2020/03					2019/12					2019/09					2019/06					2019/03
	Genel Analizler	ALTMAN Z SKOR	ROE	PD/DD	MVA mrg		ALTMAN Z SKOR	ROE	PD/DD	MVA mrg		ALTMAN Z SKOR	ROE	PD/DD	MVA mrg		ALTMAN Z SKOR	ROE	PD/DD	MVA mrg		ALTMAN Z SKOR	ROE	PD/DD	MVA mrg		ALTMAN Z SKOR	ROE	PD/DD	MVA mrg		ALTMAN Z SKOR	ROE	PD/DD	MVA mrg		ALTMAN Z SKOR	ROE	PD/DD	MVA mrg		ALTMAN Z SKOR	ROE	PD/DD	MVA mrg		ALTMAN Z SKOR	ROE	PD/DD
A1	ACSEL	-2.7	3.61	-0.95	-7.18		-1.06	-15.22	0.42	7.87		-6.73	7.89	-1.42	-2.78		11.49	3.93	2.7	3.03		3.8	5.19	0.94	1.35		-2.31	-19.12	-0.32	0.54		1.11	4.89	0.29	0.19		5.05	2.07	1.34	2.8		-3.37	12.57	-1.25	-3.12		-0.71	-23.22	0.15
A2	ADEL	0.18	5.56	1.01	-2.23		-0.73	-11.24	-1.42	3.48		0.42	-4.43	2.45	0.79		0.3	0.03	0.97	0.05		0.31	5.77	0.72	0.42		-1.22	8.94	-0.85	-0.2		0.85	-11.56	0.72	0.19		0.21	2.55	0.13	0.001		-0.08	-1.64	0.11	-0.04		-0.69	-5.67	-0.07
A3	AEFES	0.15	6.86	0.04	2.8		-0.57	-8.3	-0.16	-3.78		0.19	1	0.13	0.46		0.24	7.5	0.07	0.89		0.19	5.11	0.001	3.17		-0.66	-12.25	-0.18	-4.46		0.15	0.27	-0.03	0.19		0.32	7.41	0.11	0.8		0.21	5.11	0.11	3.88		-0.61	-5.59	-0.22
A4	AFYON	1.45	5.39	-0.66	-9.65		-0.31	2.97	-0.98	8.23		0.56	3.12	0.6	-0.36		1.49	2.09	0.71	-0.7		3.85	5.76	-0.25	2.91		-0.08	28.04	-0.55	2.07		0.11	-10.69	1.29	1.36		0.06	-10.31	0.5	0.69		-0.14	-7.9	-0.13	-1.72		-0.3	-8.32	0.03
A5	AKCNS	-0.18	5.51	-0.95	-2.87		-0.68	-7.44	0.51	3.11		0.42	3.04	0.33	0.01		0.46	5.71	-0.15	-0.5		0.94	3.54	1.01	1.06		-1.47	-9.97	-0.41	-0.08		0.8	1.93	0.56	0.21		0.42	2.73	0.05	0.01		0.3	0.62	-0.05	-0.24		-1.22	-14.43	0.02
A6	AKSA	0.45	14.19	0.89	0.19		-0.78	-16.97	-0.07	0.8		1	12.12	1.08	0.64		0.34	8.15	-0.2	-0.15		0.18	-0.61	0.42	0.12		-0.98	-14.17	-0.42	-0.33		0.34	3.06	0.42	0.21		0.35	5.12	-0.01	0.06		0.27	5.65	0.11	0.37		-0.67	-11.24	0.18
A7	ALCAR	-1.78	1.03	-2.34	-12.05		-4.03	-8.69	1.18	13.44		5.98	3.43	5.23	2.5		1.86	6.16	1.54	0.77		0.93	2.81	0.87	1.37		-1.87	-2.89	-0.59	-0.67		0.93	1.53	0.6	0.4		1.91	1.46	1.04	1.55		-1.43	0.51	-1.12	-1.76		-1.13	-12.28	0.01
A8	ALKA	2.6	5.24	-1.12	-4.52		-3.84	-27.37	1.52	5.45		0.36	2.99	-0.23	-0.54		0.73	10.59	0.14	-0.35		4.4	13.06	1.44	0.45		-2.36	-14.01	0.25	1.35		1.86	7.04	0.36	0.13		0.55	6.51	0.03	-0.05		1.24	8.5	-0.32	-0.66		-3.38	-26	0.29
A9	ALKIM	2.21	6	-1.03	-6.39		-2.9	-31.98	1.08	8.04		1.35	8.46	-0.41	-0.67		0.12	12.03	-0.47	-1.37		1.75	13.8	2.33	-0.14		-1.63	-27.07	0.49	3.53		2.53	8.94	0.55	0.25		0.48	7.58	-0.18	-0.33		1.25	11.63	0.33	-0.37		-2.38	-22.4	-0.11
A10	ALMAD	0.94	-16.36	-1.06	-34.63		-0.27	-46.85	-0.16	31.4		-1.94	3.66	0.16	-39.52		2.39	21.37	0.52	-28.61		0.95	2.72	1.64	73.46		0.45	3	0.02	25.79		0.41	22.59	-0.84	-2.71		-0.02	-14.79	0.74	2.68		0.16	22.23	-0.88	-11.21		-1.36	169.35	0.1
A11	ARCLK	0.15	3.04	-0.17	-0.16		-0.83	-13.11	0.1	-0.14		0.44	7.37	0.17	0.14		0.17	7.23	0.07	0.39		0.36	3.59	0.32	0.98		-0.89	-7.23	-0.53	-1.37		0.26	1.98	0.03	0.04		0.28	2.83	-0.02	0.13		0.29	2.48	0.15	0.61		-0.83	-7.88	0.001
A12	ARSAN	0.86	6.03	0.28	1.84		-1.11	-15.8	-0.33	-1.96		0.94	7.76	0.02	0.17		0.73	7.81	0.18	1		0.57	2.74	0.44	2.66		-0.52	-11.86	-0.21	-3.23		0.14	2.43	0.24	0.38		0.42	5.43	0.1	0.69		0.42	3.72	0.05	2.59		-0.34	1.28	-0.03
A13	ASUZU	0.06	2.5	-0.53	-1.58		-0.35	-1.07	0.1	1.44		0.43	9.26	0.21	-0.11		0.12	-0.81	0.17	-0.27		0.3	-2.84	0.95	1.64		-0.97	-7.1	-0.51	-0.98		0.59	7.28	0.31	0.05		0.29	-0.43	0.37	0.38		0.08	-0.28	0.02	0.55		-0.35	9.34	0.18
A14	ATEKS	-0.91	0.27	-0.83	-5.8		0.55	-7.6	0.89	6.58		1.05	9.25	0.35	0.69		0.49	-0.47	0.44	1.45		0.38	-0.93	0.26	2.12		-0.82	-2.87	-0.28	-3.23		0.33	0.78	0.2	0.39		0.78	0.6	0.54	1.64		-0.5	0.68	-0.49	0.38		-0.54	-2.83	-0.04
A15	AVOD	-0.68	-8.28	-3.47	-9.81		-0.33	-5.95	1.34	10.37		0.43	10.59	0.47	-0.49		0.69	-10.23	4.54	1.35		0.69	-3.65	2.55	1.48		-0.7	-27.72	-0.81	0.3		0.02	2.19	0.2	0.07		0.1	10.24	-0.08	-0.07		0.34	8.51	-0.09	-0.55		-0.59	20.36	-1.53
A16	AYGAZ	0.62	8.86	-0.01	-0.08		-1.5	0.51	0.21	0.26		0.88	3.93	0.25	0.06		0.44	4.18	-0.13	-0.03		0.51	1.61	0.58	0.46		-2.22	-21.83	-0.35	-0.45		0.73	2.63	0.06	0.02		0.75	2.71	0.34	0.16		0.69	5.22	-0.21	-0.08		-1.86	-8.65	0.001
A17	BAGFS	0.1	4.47	-0.47	0.52		-0.25	7.94	0.29	-0.89		0.31	23.42	-0.03	0.37		-0.05	-24.07	0.38	0.13		0.18	-6.2	0.69	1.38		-0.56	-21.89	-0.48	-1.85		0.06	-1.53	0.68	0.45		0.44	12.29	0.27	0.85		0.13	7.45	0.13	1.77		0.45	29.86	0.02
A18	BAKAB	-0.17	2.25	-0.27	-2.16		-1.07	-11.3	0.36	2.61		0.82	4.88	0.77	0.21		0.65	1.51	0.83	0.34		0.34	5.81	0.39	0.44		-0.88	-5.09	-0.12	-0.31		0.35	0.68	0.23	0.13		0.45	1.5	0.13	0.23		0.3	2.29	0.11	0.46		-1	-17.11	-0.06
A19	BANVT	0.62	14.91	0.59	-1.48		-0.81	18.38	0.12	2.43		0.93	-10.09	2.92	0.67		0.28	-5.19	0.02	-0.12		0.63	-1.48	0.75	0.34		-1.93	-13.25	-0.21	-0.03		0.38	-5.76	0.03	0.01		0.62	3.13	0.05	-0.1		1.05	14.63	0.24	0.1		-1.8	-12.97	-0.1
A20	BFREN	-5.4	11.8	-2.25	-17.13		7.82	-13.41	-14.45	16.27		0.65	6.19	10.96	-1.95		17.39	13.9	20.21	6.82		1.89	5.99	8.08	1.75		-4.6	-31.97	-4.44	4.85		2.1	7.22	2.73	0.48		3.61	0.11	1.54	-0.14		0.24	18.4	1.44	-2.98		-3.88	-32.89	-0.63
A21	BLCYT	13.42	10.83	1.28	-4.19		10.64	-9.16	3.35	10.76		0.37	6.26	0.29	0.28		2.22	6.78	0.03	-0.55		0.18	-0.43	0.43	1.39		0.32	-35.89	0.43	0.42		2.03	16.85	0.27	0.42		1.24	8.39	0.34	0.86		0.38	9.91	-0.05	1.59		-0.76	-25.13	0.09
A22	BNTAS	1.98	5.14	0.23	-0.41		0.001	-5.7	-0.2	1.24		1	-0.71	0.08	0.15		-1.26	6.05	-0.19	-0.74		1.5	2.94	0.52	0.57		-0.41	-7.3	0.14	0.81		1.81	3.79	0.24	0.4		0.88	1.66	0.18	0.65		0.08	2.98	-0.04	0.91		0.85	-5.73	0.3
A23	BOSSA	0.71	14.11	-0.09	-2.2		-0.18	-5.01	1.16	3.75		0.8	23.12	0.41	0.29		0.25	-1.41	0.49	0.15		0.19	-9.69	1.22	0.95		-0.96	-27.66	-0.32	-0.59		0.4	7.99	0.67	0.36		0.44	14.72	0.05	0.4		0.21	4.74	-0.21	0.78		-0.62	-39.89	0.07
A24	BRISA	-0.03	10.68	-1.62	-2.01		-0.45	-18.85	1.27	2.35		0.78	12.57	1.19	0.39		0.31	15.23	-0.83	-0.27		0.36	2.08	1.66	1.2		-0.7	-5.05	-1.02	-0.76		0.23	4.4	1.12	0.49		0.25	6.51	0.16	0.51		0.1	2.06	-0.23	0.78		-0.63	-10.66	0.08
A25	BRKO	-0.22	-0.16	-0.07	-4.36		-0.09	-9.81	0.61	6.64		0.44	-2.14	-0.2	-1.74		0.81	4.81	0.68	4.52		0.24	-4.98	0.43	8.35		0.08	13	-0.09	-8.13		-0.09	-5.48	0.05	1.53		-0.07	-6.88	0.09	3.65		0.01	1.02	0.001	10.54		-0.1	4.96	-0.07
A26	BRKSN	-0.69	0.95	-0.75	-2.68		-0.96	-20.72	-0.37	2.95		1.29	6.83	1.29	0.2		0.76	17.68	0.66	0.06		0.7	0.13	1.05	0.54		-0.83	7.03	-0.13	0.24		0.37	0.2	0.38	0.15		0.43	-3.36	0.36	0.27		0.14	-1.39	-0.17	-0.04		-1.03	-3.42	0.02
A27	BRSAN	0.05	1.7	-0.21	0.53		-0.39	2.08	-0.14	-1.1		0.42	2.44	0.51	0.9		0.11	-2.08	0.1	0.35		0.16	-1.19	0.17	1.34		-0.65	-1.75	-0.23	-2.31		0.14	0.61	0.1	0.29		0.17	-1.14	0.09	0.52		0.19	2.33	-0.11	1.04		-0.65	-9.75	0.08
A28	BTCIM	-0.21	-37.84	-0.88	-2.87		0.59	86.09	8.08	4.75		0.12	11.53	0.33	0.54		-0.18	-88	0.9	1.01		-0.01	-23.44	0.57	2.92		-0.15	13.94	-0.22	-3.41		-0.08	-18.89	0.26	0.62		0.13	1.68	0.13	1.09		-0.04	-9.06	-0.01	2.62		-0.32	-4.34	0.001
A29	BUCIM	-0.34	8.83	-0.38	-1.21		0.87	-12.82	0.54	1.52		0.52	5.35	-0.44	-0.32		0.62	9.46	0.5	0.51		0.33	3.86	0.33	0.8		-1.21	-5.09	-0.32	-0.96		0.45	1.36	0.26	0.18		1.83	-1.22	1.01	1.17		-0.97	3.31	-0.91	-0.3		-1.74	-27.9	0.001
A30	BURCE	-0.03	2.19	-0.37	-5.86		-0.33	-6.84	0.42	6.63		0.13	-1.22	0.01	-0.44		1.16	10.36	1.34	2.39		0.18	-1.69	0.53	4.04		-0.37	0.92	-0.05	-4.35		0.18	4.31	-0.32	-0.23		0.21	-2.92	0.27	0.5		0.04	0.73	-0.06	1.38		-0.65	-6.92	0.001
A31	BURVA	-3.88	-9.79	-7.05	-45.51		-7.19	-4.92	-21.32	62.69		6.87	-6.58	-6.38	-5.13		6.44	22.27	35.19	-26.85		0.57	-4.79	12.47	-9.82		-0.45	-4.52	4.72	47.11		2.08	2.36	4.57	2.22		1.46	-0.03	4.43	2.35		0.12	0.07	-0.01	-0.49		-1.33	-6.36	0.15
A32	CASA	0.07	15.52	-0.71	-1.07		-0.39	-4.02	0.17	0.7		3.79	26.41	5.07	-1.14		0.59	-15.25	1.53	1.65		0.48	-2.24	1.08	1.74		-0.45	-20.56	-0.03	57.96		0.62	4.31	0.35	185.88		0.16	-2.41	-0.02	-154.94		-0.54	20.35	-0.06	16.69		0.21	11.25	0.12
A33	CCOLA	0.5	9.02	0.46	0.3		-0.87	-12.23	-0.12	0.12		0.54	-0.12	0.83	0.54		0.39	9.61	-0.22	-0.01		0.4	6.22	0.19	1.07		-0.96	-13.02	-0.15	-1.27		0.27	-0.67	0.15	0.13		0.5	9.17	0.06	0.3		0.26	6.69	-0.01	1.3		-0.85	-7.14	-0.09
A34	CELHA	0.28	6.79	-1.26	-1.29		-0.4	27.43	0.25	1.59		0.35	40.94	-4.49	-0.41		0.31	-21.55	2.68	-0.31		0.3	-41.05	4.22	0.21		-0.85	19.01	0.64	0.64		0.15	-22.72	1.43	0.11		0.36	1.79	0.15	-0.01		0.29	-2.6	-0.52	-0.43		-1.78	-41.11	0.34
A35	CEMAS	0.92	1.4	-0.07	-1.16		1.27	2.34	-0.75	-0.8		-0.46	-11.93	0.12	-0.28		0.52	6.68	0.11	-0.35		3.04	11.72	0.72	3.39		1.25	17.01	-1.77	-1.68		-0.3	-36.23	0.8	0.43		0.57	3.74	0.82	1.44		0.14	8.16	-0.18	0.47		0.01	33.68	-0.15
A36	CEMTS	0.44	8.09	-0.57	-2.13		-3.02	-17.73	-0.15	1.93		3.83	6.86	-0.04	-0.58		-0.21	8.36	1.06	0.82		3.41	4.92	0.49	0.59		-3.81	-8.65	-0.57	-0.05		2.29	2.79	0.52	0.29		0.95	-0.39	0.12	0.07		1.31	4.94	-0.15	-0.56		-2.73	-29.59	-0.16
A37	CIMSA	0.9	20.07	0.15	0.18		-0.08	-1.51	0.08	0.18		0.12	2.51	0.21	0.29		0.29	6.77	0.37	0.98		0.33	3.39	0.32	2.73		-0.49	0.09	-0.26	-3.2		0.14	-1.8	0.16	0.43		0.27	0.01	0.11	0.55		0.04	-0.16	-0.06	2.44		-0.57	-10.74	-0.1
A38	CMBTN	-0.35	3.78	-6.14	-4.48		-0.73	32.02	1.53	4.2		1.42	5.98	8.94	0.8		0.66	-18.17	4.06	0.45		0.52	-10.8	1.66	0.8		-1.47	-5.99	-0.37	-0.23		0.2	1.52	0.46	0.1		0.36	-3.09	0.17	0.07		0.16	-4.84	-0.11	-0.12		-1.88	-19.64	0.06
A39	CMENT	-0.7	3.08	-1.15	-5.15		-0.65	3.56	0.28	4.87		0.55	8.02	-0.03	-0.58		0.89	-1.85	1.15	0.34		1	-7.6	1.32	4.05		-0.93	6.23	-0.35	-2.08		0.35	-1.26	0.31	0.54		-0.52	-2.91	-0.4	-0.71		-0.14	-3.01	0.01	-0.16		0.28	-2.1	0.38
A40	CUSAN	0.74	18.86	0.15	-1.2		-1.35	-6.4	-0.49	1.1		0.52	5.11	0.41	-0.03		0.54	6.37	0.82	0.49		0.63	-0.39	0.56	0.51		-1.14	-4.64	-0.38	-0.18		0.57	-0.66	0.37	0.17		0.62	0.94	0.22	0.2		0.43	5.38	-0.04	0.2		-0.58	3.18	0.04
A41	DAGI	0.99	-0.78	0.29	0.33		-0.48	-9.08	-0.53	0.08		-0.86	-4.02	-2.27	-3.67		1.29	7.39	1.71	1.8		1.01	6.7	1.72	5.11		-0.87	-10.51	-0.21	-1.93		0.27	2	0.26	0.23		0.76	2.29	0.8	1.25		-0.06	1.61	-0.6	0.49		-0.92	7.57	0.04
A42	DERIM	-0.03	-6.08	-0.36	-1.88		-0.45	7.98	0.64	2.64		0.3	-4.99	0.63	0.001		0.22	-2.12	0.4	-0.1		0.28	-1.15	0.95	0.59		-0.75	9	-0.81	-0.08		0.53	11.65	-0.29	0.14		0.42	-10.23	2.78	0.93		-0.02	-11.88	-1.13	0.13		-0.56	4.05	-0.02
A43	DESA	-0.23	1.08	-1.73	-6.34		-0.4	-1.82	1.39	7.59		0.69	1.64	1.59	0.38		0.62	5.43	0.62	-0.22		0.19	-6.42	1.05	0.76		-1.28	-18.37	-0.57	0.13		0.67	2.69	1.05	0.29		0.3	8.43	-0.2	0.12		0.43	2.75	0.41	0.68		-1.29	-5.51	-0.01
A44	DEVA	-0.63	8.76	-0.86	-4.59		-0.32	-27.87	0.31	5.18		0.45	6.9	0.38	0.05		0.35	10.41	-0.48	-0.97		1.07	8.99	1.3	1.39		-0.61	-14.19	0.01	0.74		0.5	6.62	0.26	0.06		0.41	5.57	0.23	0.25		0.38	7.54	0.18	0.88		-0.52	-10.25	0.19
A45	DITAS	1.07	10.7	0.19	-2.35		1.85	3.04	2.35	5.12		-1.03	16.83	-7.46	-2.27		1.51	12.61	4.41	0.36		0.75	-3.08	2.98	0.34		-1.26	-12.97	0.87	1.72		0.63	-6.03	1.63	0.36		0.4	3.01	0.08	0.03		0.34	3.07	-0.16	-0.22		-1.47	-21.53	0.22
A46	DMSAS	0.29	7.47	-0.1	-0.55		-0.85	-7.24	0.08	0.83		0.49	11.76	-0.26	-0.18		0.38	7.71	0.49	0.3		0.54	-6.43	1.14	0.97		-1.33	-14.81	-0.37	-0.73		0.58	3.77	0.36	0.08		0.36	-0.28	-0.07	0.05		0.19	3.93	-0.11	0.14		-1.11	-24.6	0.19
A47	DOBUR	1.32	7.79	2.3	-7		-1.95	37.2	-6.95	10.95		2.32	-9.68	6.14	-1.63		2.34	4.8	5.54	-0.19		3.25	-11.5	10.51	6.19		-1.87	4.22	-2.16	1.33		1.21	-3.37	2.69	0.61		0.24	-8.17	0.3	-0.07		0.52	-1.95	0.38	-0.03		-2.21	-7.75	-0.3
A48	DOGUB	-0.34	2.89	-0.08	-28.43		1.26	10.46	1.24	39.18		-0.8	-0.36	1.06	-6.68		2.06	0.14	1.56	-11.8		2.35	-4.49	2.03	-17.15		-2.82	8.55	-0.52	41.65		-0.11	-0.37	0.44	1.52		2.18	-1.11	0.74	0.55		4.31	1.66	-2.07	-35.02		-0.99	10.81	-1.41
A49	DOKTA	0.45	15.59	-2.34	-2.72		-0.52	-16.6	-5.55	2.38		0.38	42.18	-10.45	-1.37		0.11	9.33	-6.53	-0.91		0.46	-7.39	12.96	1.21		-1.81	-120.05	-21.73	0.67		0.96	75.43	32.43	1.24		0.94	7.26	4.87	0.7		0.46	13.8	1.28	0.73		-0.82	-59.65	-0.42
A50	DURDO	0.34	13.45	0.39	-0.74		-0.33	12.89	0.85	1.56		0.39	29.65	-3.27	-0.61		0.22	-23.81	3.39	0.29		-0.03	-11.57	0.29	-0.64		-1.04	-23	1.07	1.27		0.47	0.65	1.02	0.28		0.67	10.1	0.91	0.48		0.26	4.36	-0.15	0.29		-0.92	-23.83	0.17
A51	DYOBY	0.27	4.67	-1.05	-1.29		-1.7	-37.04	0.55	1.31		0.95	14.11	0.18	0.05		0.63	14.24	0.57	0.08		0.48	14.82	0.84	0.37		-1.04	-9.84	-0.45	-0.1		0.48	-2.64	-0.1	0.01		0.3	-0.94	0.59	0.11		0.24	10.41	-0.12	0.18		-0.77	33.42	0.02
A52	EGEEN	-2.99	10.4	-2.84	-18.23		1.86	-20.66	0.46	16.44		5.73	5.66	4.14	4.42		0.59	13.31	-0.07	-2.27		1.29	10.04	1.48	4.22		-2.93	-28.3	-0.56	1.96		1.2	4.35	0.37	0.14		0.69	5.13	-0.27	-0.53		0.1	13.91	0.5	-1.14		-0.93	-44.38	0.28
A53	EGGUB	-0.08	9.91	-1.61	-4.07		-0.37	-22.1	1.33	5.16		0.46	5.17	0.21	-0.16		1.58	9.73	1.44	0.42		1.06	6.9	1.48	0.82		-1.17	-8.72	-0.62	0.02		-0.78	1.31	0.63	0.11		1.05	6.6	0.39	0.17		0.51	8.35	0.02	-0.06		-0.82	-10.87	0.06
A54	EGPRO	0.13	9.86	-0.71	-2.66		-1.34	-16.08	-0.88	2.16		1.34	13.41	0.6	0.33		0.45	5.52	1.15	0.17		0.37	-0.6	0.98	0.71		-0.82	-4.89	-0.52	0.07		0.35	4.58	0.41	0.09		0.4	4.32	-0.04	-0.17		0.07	1.29	-0.57	-1.58		-0.9	-26.11	0.81
A55	EGSER	0.12	12.15	0.01	-1.81		-0.59	-13.64	0.35	2.42		1.12	8.86	0.5	0.3		0.68	7.6	0.21	0.18		0.56	3.56	0.41	1.17		-1.06	-4.64	-0.13	-0.95		0.45	3.97	0.11	0.21		1.06	0.78	0.74	1.37		-0.97	1.82	-0.74	-0.53		-1.21	-17.25	-0.02
A56	EKIZ	0.52	42.17	-2.19	-0.99		-0.65	-21.43	0.73	0.77		0.4	44.25	-4.24	-1.3		-0.09	-46.62	1.37	-4.92		1	-0.26	6.48	8.4		-1	-28.98	0.63	-1.42		0.78	64.44	-0.17	0.04		0.41	28.06	0.11	0.23		0.18	-40.78	0.16	1.94		-0.66	46.77	-0.01
A57	EMKEL	0.47	5.02	-0.11	-1.51		-0.05	8.33	-1.47	1.57		0.4	1.66	1.22	0.45		0.06	-5.06	0.59	0.42		0.25	0.3	0.83	1.74		-0.24	4.24	-0.15	-1.83		0.17	6.61	0.09	0.32		0.1	-4.08	0.33	0.63		0.14	6.16	-0.19	2.46		-0.01	44.95	-0.06
A58	EPLAS	-0.6	2.47	-1.87	-4.65		-2.79	-44.88	0.31	4.37		1.19	15.45	0.87	0.51		0.35	12.03	-0.1	-0.55		1.14	6.11	1.17	0.08		-0.18	16.76	-1.16	0.98		0.79	-0.59	2.17	0.69		0.76	2.15	0.05	0		0.47	2.17	0.27	0.29		-2.05	-80.85	0.09
A59	ERBOS	2.63	8.42	1.7	0.08		-0.75	-8.63	0.7	2.73		0.77	6.27	0.04	-0.08		1.11	4.81	0.39	0.23		0.96	2.97	0.32	0.6		-1.22	-16.59	-0.6	-0.47		-0.22	1.3	0.32	0.14		0.88	3.15	0.28	0.21		0.13	8.47	-0.14	-0.19		-1.11	-18.26	-0.07
A60	EREGL	0.36	6.58	0.001	-0.18		-0.95	-2.21	-0.01	0.11		1.22	4.97	0.49	0.87		0.23	1.25	0.001	0.29		0.18	1.64	0.03	1.28		-1.06	-10.57	-0.25	-2.12		0.33	0.26	0.21	0.34		1.24	2.77	0.83	1.86		-0.68	4.59	-1.2	-2.33		-1.29	-16.69	0.31
A61	ERSU	-4.21	-0.57	-2.29	-38.06		0.64	-2	-0.1	36.08		-2.24	0.29	-0.61	-7.52		1.12	0.51	0.89	0.48		2.6	0.43	0.9	0.11		3.08	-6.87	1.26	11.79		1.08	-6.47	0.52	2.96		0.73	6.97	0.42	3.42		-0.14	6.03	0.08	1.97		-0.27	0.31	-0.09
A62	FMIZP	-20.4	16.14	-23.66	-36.31		-5.79	-20.96	22.48	33.5		-0.39	9.53	-7.63	-17.32		19.24	11.6	19.83	16.23		30.56	7.37	2.37	-1.31		-16.04	-28.09	4.46	16.4		27.21	8.71	6.69	3.3		16.56	7.16	5.25	3.18		-12.44	16.02	-6.29	-8.76		-17.62	-34.57	1.88
A63	FORMT	2.41	-0.57	-0.72	-0.18		-1.78	-8.12	-3.99	-1.27		0.63	8.37	0.82	-0.62		0.4	13.42	0.51	-0.5		0.46	-7.93	1.96	0.5		-0.62	27.29	-1.18	0.92		-2.19	-28.62	-1.71	-4.74		3.47	0.42	5.63	9.56		-3.13	0.33	-5.44	-29		1.86	-14.06	4.45
A64	FRIGO	-0.57	8.61	-4.2	-9.84		0.13	-35.11	3.69	10.76		-2.81	16.29	-2.49	-1.07		2.61	4.6	3.71	1.63		1.77	4.99	1.43	0.88		-1.09	-29.4	-0.86	-0.29		-0.05	8.66	0.78	0.33		1.22	5.91	1.69	1.01		0.4	13.73	-0.5	0.33		-0.49	-10.09	0.001
A65	FROTO	0.79	10.33	-2.85	-1.73		-1.33	-29.47	4.93	2.82		1.55	12.04	-0.15	-0.07		0.62	25.59	0.43	-0.39		0.6	6.25	1.7	0.06		-2.56	-26.33	-1.03	0.61		0.77	12.92	0.82	-0.06		0.8	6.61	-1.04	-0.34		0.99	8.78	0.65	-0.39		-2.51	-29.54	0.39
A66	GEDZA	-0.34	7.59	-0.55	-5.72		-0.18	-19.15	0.64	7.9		1.26	7.66	0.96	0.5		0.25	9.99	0.68	0.57		1.45	5.95	0.5	0.79		-0.75	-12.39	0.08	0.31		0.1	3.96	0.1	0.1		0.72	4.05	0.08	0.18		0.37	6.84	0.13	0.63		-0.9	-21.21	0.03
A67	GENTS	-1.35	6.75	-0.73	-2.2		-1.72	-22.06	-0.43	1.74		2.12	8.79	1.33	0.75		0.71	11.25	0.03	-0.16		0.72	3.03	0.5	0.74		-0.98	-0.81	-0.17	-0.29		0.93	-1.13	0.48	0.32		0.6	2.61	0.08	0.26		0.02	3.9	-0.14	0.32		-1.39	-20.92	0.06
A68	GEREL	-0.14	1.21	-0.73	-2.8		-0.66	-0.17	-0.31	3.14		0.05	3.51	-0.01	-0.76		0.2	0.4	0.35	-0.76		1.44	2.83	2.53	2.26		-0.41	32.16	-0.68	-0.08		0.16	-3.86	0.77	0.41		0.22	-10.93	0.35	0.33		-0.16	-12.05	0.12	0.55		-1.26	-6.94	-0.24
A69	GOLTS	-0.19	-0.49	-1.13	-2.11		-0.26	-3.29	0.94	2.08		0.4	3.41	0.89	0.45		0.19	-1.17	0.39	0.47		0.28	-1.28	0.4	1.76		-0.62	-10.69	-0.38	-1.92		0.13	2.49	0.24	0.17		0.22	2.98	0.15	0.53		0.17	-0.85	0.04	1.06		-0.41	7.41	-0.17
A70	GOODY	0.55	8.88	-0.22	-0.55		-1.9	-7.42	-0.09	0.6		1.1	4.58	0.69	0.18		0.38	10.06	-0.16	-0.24		1.39	-3.01	0.62	0.54		-2.81	-27.15	-0.21	-0.17		1.96	21.05	0.09	0.04		0.86	4.46	1.12	0.52		0.02	5.34	-1.4	-0.73		-1.7	-20.17	-0.02
A71	GUBRF	-1.62	5.48	-8.68	-5.97		-1.19	-31.5	-8.51	4.45		3.36	-12.62	7.72	2.42		0.41	12.55	2.72	-0.53		1.27	15.97	7.44	0.84		0.01	40.41	3.29	1.78		0.29	-18.01	2.58	0.31		0.4	-0.16	1.64	0.37		0.23	0.19	0.15	0.3		-0.89	-17.68	-0.07
A72	HATEK	0.19	3.26	-0.23	-1.25		0.08	-5.32	0.41	1.36		0.5	5.77	0.05	0.19		0.32	0.77	0.23	1.19		0.24	0.44	0.15	3.13		-0.63	-10.95	0.02	-3.84		0.58	10.04	0.04	0.06		0.21	0.61	-0.04	0.66		0.001	-1.07	0.09	2.29		-0.6	-6.51	-0.01
A73	HEKTS	0.27	-0.99	-3.08	-7.39		-0.26	-17.34	2.68	10.2		0.5	6.75	1.7	0.57		-0.24	6.4	-1.06	-2.43		-0.17	2.02	1.59	0.08		-0.29	-16.84	0.4	3.89		0.78	-6.06	-0.15	0.1		1.01	3.84	3.75	2.25		-0.46	6.38	-2.9	-2.56		-0.86	-18.03	0.08
A74	HURGZ	0.01	-6.45	0.64	-0.03		-0.51	10.63	-0.2	2.93		-0.38	-4.14	-0.24	-1.15		0.84	-0.92	0.84	1.93		0.47	-3.14	0.51	3.27		-0.54	2.96	-0.2	-2.26		0.51	3.79	0.19	0.43		0.09	-7.21	0.12	0.73		-0.1	-3.4	-0.05	1.05		-1.8	-42.69	-0.09
A75	IHEVA	-0.63	3.44	-0.34	-0.71		-2.96	-7.49	-0.39	-0.3		-0.3	5.28	-0.32	-0.76		2.04	1.44	-0.16	-1.15		-0.22	1.71	0.1	-2.08		-4.32	-10.58	-0.86	1.54		4.46	3.42	1.3	2		3.01	4.26	0.47	1.17		0.34	-0.03	0.22	0.96		0.1	-0.4	0.45
A76	IHGZT	5.63	0.56	-0.32	-1.52		-4.4	7.07	-1.59	-2.12		-3.24	1.74	-2.1	-6.15		7.01	-2.16	3.66	8.63		-3.35	-2.63	-0.97	-7.49		-3.16	-12.45	-0.69	4.7		6.36	6.93	1.82	3.36		0.89	1.26	0.37	1.28		1	-0.79	0.46	4.67		-0.13	2.42	0.07
A77	ISDMR	-0.16	7.61	-0.21	-1.3		-0.82	-6.22	0.25	1.4		1.59	6.14	0.38	0.64		-0.02	1.4	-0.14	-0.21		0.23	2.31	0.08	0.47		-1.75	-12.14	-0.42	-0.96		0.54	0.83	0.26	0.25		2.51	2.69	1.17	2.07		-0.8	5.99	-1.51	-3.16		-2.04	-22.32	0.47
A78	JANTS	-1.44	16.03	-8.02	-22.58		-0.14	-27.11	11.38	27.55		5.71	7.47	2.68	0.58		5.01	12.39	4.26	2.58		1.31	10.29	0.45	-0.7		-2.76	-18.81	0.08	1.63		1.33	3.12	0.51	0.16		2.47	7.18	1.87	1.47		-0.6	11.37	-1.32	-1.44		-1.62	-19.42	-0.11
A79	KAPLM	-0.39	10.29	-4	-4.53		-1.08	-5.14	-1.49	3.93		1.49	4.8	6.28	1.01		0.87	3.18	2.42	0.2		0.6	0.79	1.67	0.51		-0.67	12.55	-0.21	0.63		0.4	5.8	0.32	0.02		0.3	-11.67	0.71	0.2		0.23	-0.21	0.08	0.05		-1.22	-13.3	-0.16
A80	KARSN	-0.19	-4.51	-0.24	-8.04		-0.57	-5.37	0.93	10.66		0.44	2.55	-0.19	-0.31		0.21	1.41	0.2	-1.15		0.61	0.48	2.27	2.41		-0.66	-4.64	-0.42	-0.26		0.48	-0.64	0.88	0.51		0.2	1.29	-0.85	0.01		0.25	12.7	-0.82	0.01		-0.49	-3.18	0.58
A81	KARTN	-7.42	8.88	-2.44	-10.62		-16.73	-15.75	-4.13	8.01		25.05	5.85	8.72	4.99		4.23	7.8	1.15	0.44		1.6	6	0.62	-0.42		-3.28	-13.55	-0.43	1.44		1.2	4.16	0.22	-0.04		0.91	2.54	0.09	-0.28		-0.29	5.28	-0.14	-1.65		-1.94	-21.99	-0.01
A82	KATMR	0.02	-3.53	0.6	0.6		-0.22	5.63	0.86	0.21		0.39	25.87	1.19	2.08		-0.08	-16.43	-2.57	0.21		0.14	-9.85	2.29	4.66		-0.33	-3.2	-0.68	-5.97		0.02	-14.44	0.75	0.58		0.25	13.03	0.03	1.42		0.41	-3.77	-0.41	-1		-0.18	13.81	0.26
A83	KENT	-26.26	5.07	-39.38	-129.84		-36.06	-13.44	-10.06	115.75		-1.84	4.45	0.76	-15.71		87.19	0.73	68.3	56.47		9.77	6.74	17.34	7.72		-2.59	2.34	-0.67	9.49		3.42	1.61	3.44	0.64		0.22	0.6	-0.24	-1.92		0.02	2.26	0.14	-6.07		-2.43	-11.81	-0.13
A84	KERVT	0.1	4.09	-0.76	-1.25		-1.34	-35.94	-0.59	0.92		0.76	24.98	-0.86	-0.12		0.41	7.46	0.71	0.2		0.41	2.08	0.87	0.39		-0.79	-18.63	0.04	0.14		0.63	3.01	0.63	0.67		0.38	6.29	0.56	0.56		0.36	6.34	0.14	1.03		-0.56	10.96	-0.46
A85	KLMSN	0.23	8.75	-0.3	0.45		-0.65	-8.78	0.37	-0.41		0.38	12.11	-0.01	0.04		0.14	0.65	-0.2	-0.09		0.39	6.83	0.49	0.83		-1.48	-40.8	-1.05	-1.19		0.36	2.21	1.33	0.33		0.43	3.63	0.21	0.18		0.44	16.07	0.13	0.68		-0.67	-15.26	0.32
A86	KNFRT	-0.01	4.79	-0.77	-4.43		-0.45	-12.04	0.31	5.23		-0.45	2.21	-0.55	-0.85		0.57	0.7	1.79	1.05		0.94	7.74	0.55	0.09		-0.67	-9.11	-0.22	0.5		-1.64	-3.32	0.06	-0.11		2.3	0.93	1.83	2.07		-0.34	7.8	-1.2	-1.77		-0.81	-20.19	-0.13
A87	KONYA	-9.56	-0.35	-2.84	-36.24		-3.27	-5.59	-0.44	37.64		11.93	0.52	7.34	4.14		7.99	6.45	3.71	2.5		1.72	0.13	1.4	-3.64		-4.54	-2.31	-1.25	7.44		1.28	0.68	0.78	0.13		2.14	1.27	0.45	-0.83		-0.07	-0.51	-0.05	-5.93		-0.13	-11.26	0.12
A88	KORDS	0.28	6.91	-0.13	0.22		-0.24	-0.99	0.43	-0.08		0.41	2.29	0.32	0.51		0.24	0.35	-0.18	-0.36		-0.02	0.44	0.21	1.74		-0.84	-14.09	-0.31	-1.95		0.11	2.62	-0.04	0.09		0.1	3.69	0.04	-0.03		0.29	4.85	0.09	0.58		-0.81	-12.77	0.001
A89	KRDMA	0.49	15.89	-0.24	-0.2		-0.28	9.83	-0.14	0.09		0.37	13	-0.24	-0.15		0.31	-3.99	0.65	0.51		0.32	-3.11	0.74	2.02		-0.72	-6.43	-0.19	-1.81		0.1	-2.96	0.19	0.32		0.13	0.9	-0.01	0.31		0.22	2.51	-0.04	0.96		-0.93	-18.29	0.13
A90	KRDMB	0.47	15.89	-0.31	-0.3		-0.19	9.83	0.12	0.28		0.52	13	0.25	0.21		0.17	-3.99	0.21	0.32		0.24	-3.11	0.5	1.76		-0.72	-6.43	-0.2	-1.82		0.1	-2.96	0.19	0.32		0.13	0.9	-0.01	0.3		0.22	2.51	-0.04	0.98		-0.94	-18.29	0.13
A91	KRDMD	0.46	15.89	-0.34	-0.47		-0.18	9.83	0.14	0.48		0.62	13	0.57	0.41		0.14	-3.99	0.09	0.25		0.22	-3.11	0.45	1.71		-0.72	-6.43	-0.2	-1.82		0.09	-2.96	0.17	0.3		0.13	0.9	-0.01	0.29		0.22	2.51	-0.04	0.96		-0.98	-18.29	0.05
A92	KRSTL	-0.99	0.79	-0.09	-1.65		-3.42	-2.97	-0.79	1.58		3.59	0.43	0.99	0.67		0.08	1.26	0.04	-0.34		1.27	0.79	0.67	1.15		-1.05	0.64	-0.19	-0.37		0.83	0.36	0.23	0.25		0.51	0.91	0.26	0.51		0.03	-1.14	0.07	1.28		0.28	13.14	-0.75
A93	KRTEK	-0.29	6.1	-2.31	-3.37		0	-11	2.25	3.44		0.27	-3.24	-0.72	0.1		0.36	10	0.76	0.56		0.14	1.15	0.93	1.68		-0.67	0.4	-0.74	-2.16		-0.05	-9.76	0.81	0.57		0.42	10.59	0.25	0.34		0.23	4.04	0.06	0.83		-0.51	-17.65	-0.02
A94	KUTPO	-0.43	1.48	0.25	-7.31		-0.82	-7.07	0.29	10.25		3.67	4.11	2.08	0.98		-1.47	1.93	-0.68	-3.44		5.35	3.16	3.18	8.2		-0.99	-12.08	0.01	-1.27		0.47	4.71	0.1	0.14		0.61	0.66	0.07	0.33		0.27	4.09	0.06	0.84		-1.36	-9.15	-0.06
A95	LUKSK	-1.49	5.56	-3.29	-17		2.17	-1.6	4.55	20.69		0.53	13.99	-0.72	-0.77		0.74	-3.72	1.76	1.93		0.45	-3.17	0.97	3.65		-0.77	-12.44	-0.14	-2.77		0.34	1.05	0.27	0.53		0.37	4.07	0.2	0.95		0.17	4.71	-0.08	1.18		-0.32	3	-0.03
A96	MAKTK	-0.72	3.53	-1.74	-19.49		-2.49	-2.26	0.85	21.45		2.37	1.3	1.53	0.52		0.35	2.39	-0.05	-3.48		1.14	-2.11	1.77	4.11		-2.42	-5.13	-1.1	2.04		-0.16	-2.37	-0.28	-0.56		0.89	3.72	0.17	-1.17		1.03	1.47	0.09	-4.24		-1.9	-8.35	-0.86
A97	MNDRS	0.02	3.14	-0.42	1.09		-0.52	3.13	0.09	-1.78		0.31	150.6	-44.82	-0.39		0.12	-23.55	36.24	-0.03		0.35	-76.49	7.22	1.23		-0.94	-54.59	0.79	-1.06		0.24	-14.46	0.92	0.19		0.47	25.96	-0.02	0.36		0.11	-11.41	0.07	1.18		-0.51	23.89	0.001
A98	MRSHL	-1.53	-36.99	5.43	-10.94		-2.39	0.82	-8.18	10.8		0.7	0.82	-10.53	-3.84		3.81	6.6	31.39	6.96		0.48	3.21	3.79	0.07		-1.94	-12.28	-1.04	1.68		1.48	10.5	1.33	0.24		0.5	-5.69	0.99	-0.02		0.19	11.36	0.001	-0.64		-1.14	60.99	-0.51
A99	NIBAS	-10.59	-0.8	-3.94	-86.88		-44.11	6.36	-21.16	16.69		38.01	-8.5	18.27	22.9		14.88	-1.3	8.5	26.5		4.05	0.48	2.03	-13.65		-1.78	-1.67	-0.28	57.61		-5.75	6.59	-6.82	-23.7		2.95	0.2	1.01	-14.99		-1.61	-1.3	1.89	-42.35		4.99	16.65	3.31
A100	NUHCM	-1.31	7.73	-2.66	-13.49		-1.41	-26.49	1.49	13.18		3.99	3.1	2.22	2.13		1.06	6.13	0.35	0.24		0.9	16.97	0.45	1.04		-0.93	-7.98	-0.41	-0.57		1.18	3.45	0.53	0.49		0.55	2.94	0.12	0.24		0.03	5.7	-0.05	0.38		-0.86	-11.76	-0.12
A101	OLMK	0.04	8.26	-0.61	-1.63		-2.05	13.1	-3.46	0.87		0.8	6.04	1.68	-0.12		1.61	-1.29	2.99	0.8		0.17	0.29	0.37	-0.91		0.42	32.25	0.49	2.01		0.23	-12.92	0.95	0.18		0.4	0.01	0.24	0.07		-0.07	-17.32	0.001	-0.03		-0.92	-14.56	0.22
A102	OTKAR	0.16	25.56	-4.94	-5.18		-1.1	-45.66	5.15	6.47		1.14	17.35	3.04	1.1		0.08	15.06	-1.49	-0.72		0.51	24.11	0.62	0.23		-1.77	-50.28	-0.56	0.36		0.36	4.82	0.5	0.23		0.76	10.15	-0.15	-0.2		0.65	43.84	-2.81	-2.16		-0.96	-45.85	3
A103	OYAKC	-0.21	5.85	-0.5	-4.34		-1.15	-10.23	-1.03	4.1		0.39	8.03	0.04	-0.88		0.87	7.61	0.14	-1.93		-0.67	2.24	1.77	-4.63		-4.6	-14.24	-0.39	7.9		2.39	5.41	0.82	0.51		1.28	3.57	0.66	0.69		3.06	-0.01	-0.36	-4.65		-1.31	-8.72	0.39
A104	OYLUM	1.98	4.31	1.55	0.53		-1.12	-3.63	-0.47	1.34		0.09	1.68	-0.23	-0.47		1.02	4.61	1.05	0.76		0.05	2.41	-0.04	-0.99		-0.04	-6.24	-0.48	1.15		0.86	0.78	1.49	0.75		0.85	1.59	1.1	1.24		0.07	1.45	-0.55	0.1		-0.43	2.14	0.03
A105	PARSN	-0.15	3.6	-0.59	-2.11		-0.06	-6.68	0.58	2.41		0.31	8.31	0.02	0.46		0.09	4.3	-0.09	0.06		0.21	-1.35	0.79	4.28		-0.41	0.41	-0.83	-4.71		0.22	-4.08	-0.02	0.16		-0.05	-0.98	-0.18	-0.26		0.33	1.69	0.77	3.03		-0.08	12.54	-0.03
A106	PENGD	-1.29	-0.19	-0.6	-4.42		-0.64	0.21	-0.59	4.21		1.13	4.21	0.03	-0.82		3.14	7.41	2.27	3.89		-0.37	-6.91	-0.55	-1.15		-0.05	0.29	0.58	0.62		-0.07	7.39	-2.33	-0.83		0.41	27.71	-0.45	-0.3		-0.13	-12.39	-0.66	-1.42		-0.79	-29.57	2.38
A107	PETKM	0.54	12.15	-0.1	0.14		-0.39	-3.54	0.07	-0.09		0.41	5.49	-0.05	0.24		0.09	5.87	-0.12	0.06		0.31	2.95	0.49	1.03		-0.85	-15.93	-0.32	-1.31		0.14	1.75	0.07	0.05		0.18	4.32	-0.3	-0.08		0.32	6.27	0.12	0.56		-0.81	-17.06	-0.26
A108	PETUN	0.1	3.02	-0.25	-0.68		-1.37	-9.96	-0.06	0.35		0.22	2.71	-0.3	-0.35		0.51	2.99	0.39	0.28		0.91	2.59	0.51	1.49		-1.05	-3.15	0.08	-0.89		0.51	1.2	0.07	0.11		0.5	3.32	0.07	0.4		0.31	2.13	-0.09	0.76		-0.99	-10.81	0.16
A109	PINSU	-0.04	-39.06	2.03	-1.81		-0.19	25.21	1.28	2.91		-0.12	28.05	-7.91	-0.69		0.36	10.64	2.66	0.001		0.22	-45.6	5.31	1.21		-0.41	22.73	1.9	0.45		0.14	-20.27	0.49	0.06		0.29	-5.52	0.32	0.1		0.1	-21.37	0.16	0.7		-0.62	18.03	0.17
A110	PNSUT	0.17	0.26	-0.14	0.22		-0.92	-0.73	-0.12	-0.52		0.32	0.13	0.06	0.09		0.28	0.51	0.09	0.19		0.4	0.16	0.22	0.74		-0.86	-0.87	-0.02	-0.8		0.4	1.48	0.11	0.09		0.42	0.1	0.13	0.37		0.3	0.04	0.01	0.85		-0.86	-4.06	0.001
A111	PRKAB	0.67	1.87	1.72	-1.49		-2.16	-8.1	-0.48	2.36		0.97	2.28	1	-0.22		1.05	3.08	2.57	0.51		0.98	2.53	1.11	0.16		-1.31	-7.09	0.3	0.65		0.5	2.72	0.38	0.1		0.83	1.97	0.24	0.08		0.41	1.87	-0.12	-0.05		-1.07	-11.16	0.09
A112	PRZMA	-1.52	0.26	-0.6	-3.75		-0.59	-13.63	-0.13	1.73		2.45	14.74	0.08	0.35		-6.34	0.65	0.02	-19.97		-2.53	-0.37	-0.18	-18.59		3.22	-0.08	0.21	37.06		0.76	2.03	-0.25	-6.05		3.86	2.13	1.45	9.69		0.33	-0.35	0.25	3.92		-1.14	-2.36	0.05
A113	RTALB	-1.56	17.56	-2.6	-13.04		-3.75	-35.84	-1.07	13.15		-9.06	9.5	-5.81	-9.86		1.04	7.9	2.46	-2.31		12.96	23.67	9.2	11.11		0.76	5.82	1.44	6.08		-1.8	-1.52	0.32	2.04		3.32	-1.88	0.18	1.76		-0.52	5.54	-0.06	0.93		0.63	3.71	-0.18
A114	SAMAT	-0.89	-43.43	-0.2	-8.17		-2.53	-18.91	-3	8.96		2.25	9.97	5	1.22		0.53	1.74	0.99	-0.16		1.18	-2.4	1.01	1.51		-0.6	146.32	-0.56	0.15		0.09	-124.25	2.39	0.24		0.47	-7.02	0.07	0.38		0.19	-9.86	0.25	1.74		-1.01	-1.54	-0.09
A115	SANFM	0.73	14.11	2.17	-1.08		-0.59	-16.35	0.72	3.5		0.54	20.14	1.14	0.23		0.49	-0.4	1.4	0.29		0.33	0.72	0.68	-0.27		-1.02	-14.42	-0.3	0.59		0.73	13.06	1.8	0.38		0.41	4.62	0.3	0.04		0.25	-0.26	-0.02	0.3		-0.86	-3.51	0.43
A116	SARKY	0.85	14.73	-0.56	-0.63		-1.56	-18.44	0.94	0.77		0.86	10.1	0.44	0.06		0.76	13.31	1.26	0.28		0.55	3.17	-0.11	-0.01		-2.01	-12.13	-0.07	-0.14		0.64	0.57	0.42	0.04		0.81	1.85	0.08	0.01		0.62	6.09	0.05	0.08		-2.52	-9.91	-0.14
A117	SASA	0.21	14.5	-0.71	-4.07		0.45	-7.16	3.45	6.33		0.53	12.98	0.31	-0.44		0.12	-9.34	2.27	1		0.3	4.53	0.48	-1.16		-0.31	-38.52	0.27	1.93		0	2.47	0.35	0.09		-0.25	14.01	-0.61	-1.08		-0.08	13.61	0.26	-0.68		-0.88	-23.35	-0.38
A118	SAYAS	0.34	15.44	-5.79	-4.1		3.42	-22.15	8.46	5.62		-1.35	48.86	-2.76	-0.25		-1.21	-0.44	2.85	0.11		3.42	5.09	2.02	-0.04		-0.72	2.65	0.68	0.86		1.08	-12.14	1.83	0.39		0.68	4.87	0.45	0.38		0.39	3.38	-0.05	0.59		0.48	90.5	-0.16
A119	SEKUR	-0.35	3.23	-1.62	-4		-0.13	4.81	2.08	4.43		0.35	0.52	0.36	0.09		0.41	-0.4	0.76	0.63		0.27	-1.55	0.28	0.86		-0.81	-4.17	-0.2	-0.96		0.43	-0.55	0.51	0.35		0.19	1.01	-0.06	0.18		0.15	1.84	-0.64	0.08		-0.67	2.89	-0.05
A120	SELGD	2.03	0.18	0.41	-1.06		0.08	-1.96	-0.27	3.78		4.96	0.81	0.04	-8.1		4.6	0.48	1.53	9.02		1.28	0.38	0.62	11.91		-0.98	-12.63	-0.08	-9.31		0.26	10.97	-0.26	-0.34		-0.02	1.74	-0.1	-0.2		0.6	-0.28	0.3	1.53		-0.6	-2.09	-0.03
A121	SILVR	0.47	3.54	-0.75	-0.52		-1.8	-17.44	-2.2	0.34		1.08	20.63	2.94	0.24		0.37	2.95	-0.23	-0.24		0.79	-1.61	2.87	0.59		-1.3	13.63	-0.52	-0.08		0.58	-7.28	0.91	0.03		0.82	1.87	1.36	0.46		0.2	7.07	-1.2	-0.31		-1.99	-12.55	-0.01
A122	SKTAS	0.14	-0.69	0.86	1.08		-0.2	23.57	0.05	-0.79		0.25	12.54	0.18	0.26		0.21	109.51	-2.93	0.32		0.05	-70.52	2.39	1.91		-0.55	-60.88	1.3	-2		0.04	-13.87	0.75	0.41		0.06	-3.43	0.19	0.62		0.01	-23.03	0.11	1.55		0.13	75.58	0.28
A123	SNPAM	-6.97	6.73	-4.57	-30.44		-2.07	3.61	-2.28	19.95		9.99	5.53	4.76	2.81		3.81	-0.14	3.93	6.19		2.64	-1.94	1.93	6.8		-0.66	-23.45	-0.25	4.92		0.99	9.88	0.43	0.26		0.54	0.66	0.1	-1.25		0.49	12.84	-0.21	-3.68		-0.47	-7.75	-0.15
A124	TATGD	0.7	6.83	-0.25	-1.5		-0.95	-11.65	-0.59	1.38		0.28	11.58	-0.28	0.21		-0.03	1.87	0.27	-0.07		0.68	5.15	0.76	0.65		-0.81	-6.66	0.01	0.01		0.78	3.57	0.22	0.08		0.24	2.01	0.24	0.34		0.14	3.56	-0.06	-0.14		-1.02	-5.04	0.09
A125	TBORG	-0.73	7.81	-0.49	-4.98		-0.18	-22.71	-0.12	5.76		0.4	4.05	-0.16	-0.67		1.08	15.84	-0.09	-1.41		0.27	8.1	0.26	-4.05		-1.61	-32.79	0.23	6.52		1.19	8.33	0.59	0.17		0.97	15.61	-0.26	-0.77		0.001	4.72	-1.01	-4.9		-2.31	-25.59	1.46
A126	TIRE	0.71	14.73	0.16	-0.73		-1.15	-5.71	-1.45	0.83		0.28	10.87	0.11	-0.29		0.37	3.52	-0.47	-0.83		0.34	4.16	0.43	-1.73		-0.47	9.14	1.6	3.28		0.98	0.15	2.02	0.47		0.71	2.8	1.33	0.59		-0.2	-8.45	-1.52	-0.95		-1.22	-29.54	0.12
A127	TMPOL	0.25	7.52	-1.27	-3.1		-0.27	-15.24	1.61	3.62		0.5	6.82	0.48	-0.11		0.22	9.12	0.33	-0.59		0.42	5.22	0.83	0.03		-1.12	-44.64	0.02	1.23		0.54	10	0.67	0.3		0.65	1.6	1.56	1.4		-0.12	3.25	-1.5	-0.47		-0.25	37.13	-0.22
A128	TMSN	-0.66	1.62	-1.11	-5.36		0.41	-3.95	1.35	6.08		0.96	6.33	0.6	0.67		0.38	1.2	0.21	0.53		0.4	0.84	0.46	2.56		-0.47	3.48	-0.32	-2.69		0.08	-0.12	-0.1	-0.4		0.07	0.17	-0.06	-0.19		-0.09	-3.23	-0.1	-0.74		-0.49	4.04	-0.02
A129	TOASO	0.83	16.76	0.72	-0.23		-1.18	-21.99	1.02	0.97		0.62	7.72	0.34	0.07		0.11	14.35	-0.27	-0.48		0.57	7.64	1.3	0.49		-1.86	-24	-0.67	-0.08		0.64	8.37	0.56	0.09		0.73	4.98	-0.21	-0.11		0.52	10.49	0.01	-0.19		-1.41	-25.51	0.46
A130	TTRAK	0.26	13.38	-4.62	-2.19		-1.12	-17.12	4.87	2.23		1.35	18.57	1.54	0.29		0.47	15.83	0.13	-0.21		1.22	8.23	2.26	0.7		-1.37	-3.4	-1.03	0.07		0.72	8.41	0.57	0.01		0.78	3.04	0.77	0.17		0.22	2.05	0.03	0.2		-1.53	-35.68	-0.36
A131	TUCLK	0.43	5.74	0.96	0.66		-0.46	4.86	-0.46	0.16		0.27	4.96	-0.03	-0.11		0.26	2.63	0.65	0.84		0.15	-1.76	0.39	1.11		-0.55	-1.14	-0.04	-1.39		0.14	-3.38	0.38	0.4		0.38	4	0.23	0.38		0.11	0.47	-0.09	0.94		-0.45	7.72	0.02
A132	TUKAS	0.01	4.44	-0.68	-5.07		-0.85	-21.64	-0.95	5.56		0.38	-3.64	-2.21	-1.07		-0.63	12.2	-0.45	-1.45		0.22	6.4	-0.2	-3.98		-1.64	-29.87	-4.33	4.26		2.66	3.41	6	1.96		-0.21	18.75	-0.74	-0.91		0.78	9.8	0.7	-1.95		0.52	-14.14	3.46
A133	TUPRS	0.52	15.04	0.08	0.34		-0.73	14.12	-0.22	-0.33		0.28	7.87	0.3	0.18		0.32	-5.24	-0.15	-0.01		0.21	-2.61	0.43	0.17		-1.65	-25.71	-0.67	-0.48		0.27	1.53	-0.35	-0.06		0.5	-1.07	0.56	0.12		0.39	7.16	-0.43	-0.14		-2.37	-41.39	-0.3
A134	ULKER	0.16	3.77	-0.08	1.67		-0.63	-12.5	-0.24	-2.92		0.4	4.97	-0.07	-0.35		0.1	6.21	-0.21	-0.15		0.64	10.98	0.11	-0.63		-0.9	-23.94	-0.17	0.12		0.13	3.12	0.1	0.42		0.27	6.58	0.02	0.17		-0.01	2.4	0.03	1.56		-0.49	-13.07	0.06
A135	ULUUN	1.24	3.82	1	0.17		-2.37	-8.43	-1.14	-0.15		1.05	0.23	0.25	0.01		0.27	3.88	-0.06	-0.02		0.99	1.3	1.25	0.26		-1.83	-4.03	-0.09	-0.14		0.47	1.38	0.27	0.04		0.45	2.3	0.19	0.07		0.86	3.43	-0.05	0.16		-2.25	-5.41	0.05
A136	USAK	-0.03	2.4	-0.42	-1.05		-0.39	-1.35	0.04	0.72		0.23	-0.01	0.37	0.45		0.27	1.3	0.03	0.28		0.48	-0.24	0.55	2.14		-0.36	-3.54	-0.19	-2.07		0.23	1.41	0.13	0.06		0.13	-0.98	0.14	0.59		0.14	1.79	-0.01	1.5		-0.29	-0.38	-0.19
A137	VESBE	0.14	13.78	-0.64	-1.87		-1.08	-31.27	0.82	2.11		0.73	9.57	0.06	-0.02		0.2	13.69	0.001	-0.25		0.88	9.37	0.67	0.14		-1.6	-24.48	-0.69	0.25		0.63	5.09	0.57	0.1		0.47	6.05	-0.47	-0.31		0.4	15.91	0.48	-0.3		-1.12	-29.97	0.43
A138	VESTL	0.25	8.87	-0.53	-0.55		-0.7	-23.56	0.65	0.59		0.42	6.19	-0.18	-0.01		0.23	6.7	-0.05	0.02		0.33	8.09	0.33	0.51		-0.67	-3.54	-0.25	-0.62		0.28	4.61	0.18	0.04		0.41	3.42	0.97	0.44		0.05	10.34	-1.41	-0.52		-0.76	-21.25	0.83
A139	YATAS	0.2	7.25	-0.42	-1.51		-1.07	-23.92	-0.26	1.78		1.01	11.38	1.29	0.26		0.44	13.67	-0.28	-0.46		0.6	2.62	1.15	0.42		-1.58	-17.69	-0.89	0.07		0.41	4.15	0.26	-0.04		0.77	5.85	0.57	0.18		0.47	7.74	-0.41	-0.83		-1.57	-20.22	0.22
A140	YUNSA	0.12	-11.35	0.08	-3.06		-1.19	-19.26	1.99	4.83		0.26	-1.14	0.2	-0.14		0.27	7.16	-0.81	-0.73		0.71	-2.36	2.2	0.85		-1.03	0.73	-0.61	0.47		1.06	4.59	1.59	0.26		0.21	-5.24	0.3	0.04		0.32	5.43	-0.13	-0.22		-1.18	-30.14	0.17
[truncated: 5 more columns]

## Sheet: weighted
			Objectives	Types (Max or Min)	Weightage used (SWARA)
			ALTMAN Z SKOR	Max	0.163265
			ROE	Max	0.163265
			PD/DD	Max	0.244898
			MVA mrg	Max	0.428571
				benefit
			0.163265	0.163265	0.244898	0.428571

## Sheet: 19_03
xij	C1	C2	C3	C4
A1	-0.71	-23.22	0.15	0.64
A2	-0.69	-5.67	-0.07	0.12
A3	-0.61	-5.59	-0.22	-4.83
A4	-0.3	-8.32	0.03	0.78
A5	-1.22	-14.43	0.02	0.27
A6	-0.67	-11.24	0.18	-0.32
A7	-1.13	-12.28	0.01	0.16
A8	-3.38	-26	0.29	0.73
A9	-2.38	-22.4	-0.11	0.82
A10	-1.36	169.35	0.1	12.82
A11	-0.83	-7.88	0.001	-0.78
A12	-0.34	1.28	-0.03	-3.14
A13	-0.35	9.34	0.18	-0.63
A14	-0.54	-2.83	-0.04	-2.11
A15	-0.59	20.36	-1.53	0.25
A16	-1.86	-8.65	0.001	-0.05
A17	0.45	29.86	0.02	-1.28
A18	-1	-17.11	-0.06	-0.63
A19	-1.8	-12.97	-0.1	0.05
A20	-3.88	-32.89	-0.63	4.18
A21	-0.76	-25.13	0.09	-2.3
A22	0.85	-5.73	0.3	-1.1
A23	-0.62	-39.89	0.07	-1.11
A24	-0.63	-10.66	0.08	-1.3
A25	-0.1	4.96	-0.07	-15.92
A26	-1.03	-3.42	0.02	-0.21
A27	-0.65	-9.75	0.08	-1.81
A28	-0.32	-4.34	0.001	-4.42
A29	-1.74	-27.9	0.001	-0.93
A30	-0.65	-6.92	0.001	-2.02
A31	-1.33	-6.36	0.15	1.14
A32	0.21	11.25	0.12	-82.02
A33	-0.85	-7.14	-0.09	-1.61
A34	-1.78	-41.11	0.34	0.41
A35	0.01	33.68	-0.15	-1.1
A36	-2.73	-29.59	-0.16	0.46
A37	-0.57	-10.74	-0.1	-3.52
A38	-1.88	-19.64	0.06	0.08
A39	0.28	-2.1	0.38	0.56
A40	-0.58	3.18	0.04	-0.28
A41	-0.92	7.57	0.04	-1.77
A42	-0.56	4.05	-0.02	-0.74
A43	-1.29	-5.51	-0.01	-0.85
A44	-0.52	-10.25	0.19	-0.53
A45	-1.47	-21.53	0.22	0.23
A46	-1.11	-24.6	0.19	-0.16
A47	-2.21	-7.75	-0.3	0.21
A48	-0.99	10.81	-1.41	35.2
A49	-0.82	-59.65	-0.42	-0.29
A50	-0.92	-23.83	0.17	-0.62
A51	-0.77	33.42	0.02	-0.16
A52	-0.93	-44.38	0.28	1.76
A53	-0.82	-10.87	0.06	0.13
A54	-0.9	-26.11	0.81	1.9
A55	-1.21	-17.25	-0.02	-1.01
A56	-0.66	46.77	-0.01	-2.13
A57	-0.01	44.95	-0.06	-3.27
A58	-2.05	-80.85	0.09	-0.14
A59	-1.11	-18.26	-0.07	0.05
A60	-1.29	-16.69	0.31	0.25
A61	-0.27	0.31	-0.09	-4.91
A62	-17.62	-34.57	1.88	5.9
A63	1.86	-14.06	4.45	26.18
A64	-0.49	-10.09	0.001	-0.81
A65	-2.51	-29.54	0.39	0.88
A66	-0.9	-21.21	0.03	-0.63
A67	-1.39	-20.92	0.06	-0.66
A68	-1.26	-6.94	-0.24	-0.74
A69	-0.41	7.41	-0.17	-1.82
A70	-1.7	-20.17	-0.02	0.12
A71	-0.89	-17.68	-0.07	-0.36
A72	-0.6	-6.51	-0.01	-3.22
A73	-0.86	-18.03	0.08	0.7
A74	-1.8	-42.69	-0.09	-2.02
A75	0.1	-0.4	0.45	-0.42
A76	-0.13	2.42	0.07	-4.3
A77	-2.04	-22.32	0.47	1.21
A78	-1.62	-19.42	-0.11	0.32
A79	-1.22	-13.3	-0.16	-0.04
A80	-0.49	-3.18	0.58	-0.14
A81	-1.94	-21.99	-0.01	2.04
A82	-0.18	13.81	0.26	-1.98
A83	-2.43	-11.81	-0.13	8.43
A84	-0.56	10.96	-0.46	-1.81
A85	-0.67	-15.26	0.32	-0.52
A86	-0.81	-20.19	-0.13	0.18
A87	-0.13	-11.26	0.12	8.28
A88	-0.81	-12.77	0.001	-0.71
A89	-0.93	-18.29	0.13	-1.33
A90	-0.94	-18.29	0.13	-1.35
A91	-0.98	-18.29	0.05	-1.37
A92	0.28	13.14	-0.75	-2.08
A93	-0.51	-17.65	-0.02	-1.51
A94	-1.36	-9.15	-0.06	-1.32
A95	-0.32	3	-0.03	-2.39
A96	-1.9	-8.35	-0.86	5.97
A97	-0.51	23.89	0.001	-1.56
A98	-1.14	60.99	-0.51	0.91
A99	4.99	16.65	3.31	83.75
A100	-0.86	-11.76	-0.12	-0.57
A101	-0.92	-14.56	0.22	0.08
A102	-0.96	-45.85	3	2.62
A103	-1.31	-8.72	0.39	5.2
A104	-0.43	2.14	0.03	-1.1
A105	-0.08	12.54	-0.03	-2.24
A106	-0.79	-29.57	2.38	2.05
A107	-0.81	-17.06	-0.26	-0.63
A108	-0.99	-10.81	0.16	-1.14
A109	-0.62	18.03	0.17	-0.75
A110	-0.86	-4.06	0.001	-1.2
A111	-1.07	-11.16	0.09	0.01
A112	-1.14	-2.36	0.05	-1.5
A113	0.63	3.71	-0.18	-4.32
A114	-1.01	-1.54	-0.09	-2.04
A115	-0.86	-3.51	0.43	-0.32
A116	-2.52	-9.91	-0.14	-0.1
A117	-0.88	-23.35	-0.38	1.5
A118	0.48	90.5	-0.16	-0.8
A119	-0.67	2.89	-0.05	-0.71
A120	-0.6	-2.09	-0.03	-1.22
A121	-1.99	-12.55	-0.01	-0.1
A122	0.13	75.58	0.28	-2.2
A123	-0.47	-7.75	-0.15	5.72
A124	-1.02	-5.04	0.09	-0.11
A125	-2.31	-25.59	1.46	5.68
A126	-1.22	-29.54	0.12	0.36
A127	-0.25	37.13	-0.22	-1
A128	-0.49	4.04	-0.02	0.75
A129	-1.41	-25.51	0.46	0.49
A130	-1.53	-35.68	-0.36	-0.04
A131	-0.45	7.72	0.02	-1.37
A132	0.52	-14.14	3.46	4.93
A133	-2.37	-41.39	-0.3	0.07
A134	-0.49	-13.07	0.06	-1.3
A135	-2.25	-5.41	0.05	-0.23
A136	-0.29	-0.38	-0.19	-2.26
A137	-1.12	-29.97	0.43	0.75
A138	-0.76	-21.25	0.83	0.17
A139	-1.57	-20.22	0.22	0.94
A140	-1.18	-30.14	0.17	0.26
MAX	4.99	169.35	4.45	83.75
MIN	-17.62	-80.85	-1.53	-82.02
	1	1	1	1
	Normalizacija
nij	C1	C2	C3	C4
A1	0.747899	0.230336	0.280936	0.498643
A2	0.748784	0.30048	0.244147	0.495506
A3	0.752322	0.300799	0.219064	0.465645
A4	0.766033	0.289888	0.26087	0.499487
A5	0.725343	0.265468	0.259197	0.496411
A6	0.749668	0.278217	0.285953	0.492852
A7	0.729323	0.274061	0.257525	0.495747
A8	0.62981	0.219225	0.304348	0.499186
A9	0.674038	0.233613	0.237458	0.499729
A10	0.719151	1	0.272575	0.572118
A11	0.742592	0.291647	0.25602	0.490077
A12	0.764264	0.328257	0.250836	0.47584
A13	0.763821	0.360472	0.285953	0.490981
A14	0.755418	0.311831	0.249164	0.482053
A15	0.753207	0.404516	0	0.49629
A16	0.697037	0.288569	0.25602	0.49448
A17	0.799204	0.442486	0.259197	0.48706
A18	0.735073	0.254756	0.245819	0.490981
A19	0.69969	0.271303	0.23913	0.495084
A20	0.607696	0.191687	0.150502	0.519998
A21	0.745688	0.222702	0.270903	0.480907
A22	0.816895	0.30024	0.30602	0.488146
A23	0.75188	0.163709	0.267559	0.488086
A24	0.751437	0.280536	0.269231	0.48694
A25	0.774878	0.342966	0.244147	0.398745
A26	0.733746	0.309472	0.259197	0.493515
A27	0.750553	0.284173	0.269231	0.483863
A28	0.765148	0.305795	0.25602	0.468118
A29	0.702344	0.211631	0.25602	0.489172
A30	0.750553	0.295484	0.25602	0.482596
A31	0.720478	0.297722	0.280936	0.501659
A32	0.788589	0.368106	0.27592	0
A33	0.741707	0.294604	0.240803	0.48507
A34	0.700575	0.158833	0.312709	0.497255
A35	0.779743	0.457754	0.230769	0.488146
A36	0.658558	0.204876	0.229097	0.497557
A37	0.754091	0.280216	0.23913	0.473548
A38	0.696152	0.244644	0.265886	0.495265
A39	0.791685	0.314748	0.319398	0.49816
A40	0.753649	0.335851	0.262542	0.493093
A41	0.738611	0.353397	0.262542	0.484104
A42	0.754533	0.339329	0.252508	0.490318
A43	0.722247	0.301119	0.254181	0.489654
A44	0.756303	0.282174	0.287625	0.491585
A45	0.714286	0.23709	0.292642	0.496169
A46	0.730208	0.22482	0.287625	0.493817
A47	0.681557	0.292166	0.205686	0.496049
A48	0.735515	0.366347	0.0200669	0.707124
A49	0.743034	0.0847322	0.185619	0.493033
A50	0.738611	0.227898	0.284281	0.491042
A51	0.745245	0.456715	0.259197	0.493817
A52	0.738169	0.145763	0.302676	0.505399
A53	0.743034	0.279696	0.265886	0.495566
A54	0.739496	0.218785	0.391304	0.506244
A55	0.725785	0.254197	0.252508	0.488689
A56	0.750111	0.510072	0.254181	0.481933
A57	0.778859	0.502798	0.245819	0.475056
A58	0.688633	0	0.270903	0.493937
A59	0.730208	0.25016	0.244147	0.495084
A60	0.722247	0.256435	0.307692	0.49629
A61	0.76736	0.32438	0.240803	0.465163
A62	0	0.184972	0.570234	0.530373
A63	0.861566	0.266946	1	0.652712
A64	0.757629	0.282814	0.25602	0.489896
A65	0.668288	0.205076	0.32107	0.50009
A66	0.739496	0.238369	0.26087	0.490981
A67	0.717824	0.239528	0.265886	0.490801
A68	0.723574	0.295404	0.215719	0.490318
A69	0.761168	0.352758	0.227425	0.483803
A70	0.704113	0.242526	0.252508	0.495506
A71	0.739938	0.252478	0.244147	0.49261
A72	0.752764	0.297122	0.254181	0.475357
A73	0.741265	0.251079	0.269231	0.499005
A74	0.69969	0.152518	0.240803	0.482596
A75	0.783724	0.321543	0.331104	0.492248
A76	0.773552	0.332814	0.267559	0.468842
A77	0.689076	0.233933	0.334448	0.502081
A78	0.707651	0.245524	0.237458	0.496712
A79	0.725343	0.269984	0.229097	0.494541
A80	0.757629	0.310432	0.352843	0.493937
A81	0.693498	0.235252	0.254181	0.507088
A82	0.77134	0.378337	0.299331	0.482838
A83	0.671827	0.275939	0.234114	0.545636
A84	0.754533	0.366946	0.17893	0.483863
A85	0.749668	0.26215	0.309365	0.491645
A86	0.743476	0.242446	0.234114	0.495868
A87	0.773552	0.278137	0.27592	0.544731
A88	0.743476	0.272102	0.25602	0.490499
A89	0.738169	0.25004	0.277592	0.486759
A90	0.737727	0.25004	0.277592	0.486638
A91	0.735958	0.25004	0.264214	0.486517
A92	0.791685	0.375659	0.130435	0.482234
A93	0.756745	0.252598	0.252508	0.485673
A94	0.719151	0.286571	0.245819	0.486819
A95	0.765148	0.335132	0.250836	0.480364
A96	0.695268	0.289768	0.11204	0.530796
A97	0.756745	0.418625	0.25602	0.485371
A98	0.728881	0.566906	0.170569	0.500271
A99	1	0.389688	0.809365	1
A100	0.741265	0.276139	0.235786	0.491343
A101	0.738611	0.264948	0.292642	0.495265
A102	0.736842	0.139888	0.757525	0.510587
A103	0.721362	0.288289	0.32107	0.526151
A104	0.760283	0.331695	0.26087	0.488146
A105	0.775763	0.373261	0.250836	0.481269
A106	0.744361	0.204956	0.653846	0.507148
A107	0.743476	0.254956	0.212375	0.490981
A108	0.735515	0.279936	0.282609	0.487905
A109	0.75188	0.395204	0.284281	0.490258
A110	0.741265	0.306914	0.25602	0.487543
A111	0.731977	0.278537	0.270903	0.494842
A112	0.728881	0.313709	0.264214	0.485733
A113	0.807165	0.33797	0.225753	0.468722
A114	0.734631	0.316986	0.240803	0.482476
A115	0.741265	0.309113	0.327759	0.492852
A116	0.667846	0.283533	0.232441	0.494179
A117	0.74038	0.229816	0.192308	0.503831
A118	0.800531	0.684852	0.229097	0.489956
A119	0.749668	0.334692	0.247492	0.490499
A120	0.752764	0.314788	0.250836	0.487422
A121	0.691287	0.272982	0.254181	0.494179
A122	0.785051	0.62522	0.302676	0.481511
A123	0.758514	0.292166	0.230769	0.529288
A124	0.734188	0.302998	0.270903	0.494118
A125	0.677134	0.220863	0.5	0.529046
A126	0.725343	0.205076	0.27592	0.496954
A127	0.768244	0.471543	0.219064	0.488749
A128	0.757629	0.339289	0.252508	0.499306
A129	0.716939	0.221183	0.332776	0.497738
A130	0.711632	0.180536	0.195652	0.494541
A131	0.759398	0.353997	0.259197	0.486517
A132	0.8023	0.266627	0.834448	0.524522
A133	0.67448	0.157714	0.205686	0.495204
A134	0.757629	0.270903	0.265886	0.48694
A135	0.679788	0.301519	0.264214	0.493394
A136	0.766475	0.321623	0.22408	0.481149
A137	0.729766	0.203357	0.327759	0.499306
A138	0.745688	0.238209	0.394649	0.495807
A139	0.709863	0.242326	0.292642	0.500452
A140	0.727112	0.202678	0.284281	0.49635
	0.163265	0.163265	0.244898	0.428571
vij	C1	C2	C3	C4
A1	0.122106	0.0376058	0.0688008	0.213704
A2	0.12225	0.0490578	0.0597912	0.212359
A3	0.122828	0.04911	0.0536482	0.199562
A4	0.125066	0.0473286	0.0638864	0.214066
A5	0.118423	0.0433416	0.0634769	0.212747
A6	0.122395	0.0454232	0.0700294	0.211222
A7	0.119073	0.0447445	0.0630674	0.212463
A8	0.102826	0.0357917	0.0745342	0.213936
A9	0.110047	0.0381408	0.058153	0.214169
A10	0.117412	0.163265	0.0667531	0.245193
A11	0.121239	0.0476157	0.0626988	0.210033
A12	0.124777	0.0535929	0.0614293	0.203931
A13	0.124705	0.0588524	0.0700294	0.21042
A14	0.123333	0.050911	0.0610197	0.206594
A15	0.122972	0.0660434	0	0.212696
A16	0.113802	0.0471132	0.0626988	0.21192
A17	0.130482	0.0722425	0.0634769	0.20874
A18	0.120012	0.0415928	0.0602007	0.21042
A19	0.114235	0.0442943	0.0585626	0.212178
A20	0.0992154	0.0312957	0.0368576	0.222856
A21	0.121745	0.0363594	0.0663436	0.206103
A22	0.13337	0.0490187	0.0749437	0.209205
A23	0.122756	0.026728	0.0655245	0.209179
A24	0.122683	0.0458016	0.0659341	0.208688
A25	0.126511	0.0559943	0.0597912	0.170891
A26	0.119795	0.050526	0.0634769	0.211506
A27	0.122539	0.0463954	0.0659341	0.20737
A28	0.124922	0.0499257	0.0626988	0.200622
A29	0.114668	0.0345519	0.0626988	0.209645
A30	0.122539	0.0482421	0.0626988	0.206827
A31	0.117629	0.0486076	0.0688008	0.214996
A32	0.128749	0.0600987	0.0675722	0
A33	0.121095	0.0480986	0.0589721	0.207887
A34	0.114379	0.0259319	0.0765818	0.213109
A35	0.127305	0.0747352	0.0565149	0.209205
A36	0.107519	0.0334491	0.0561054	0.213238
A37	0.123117	0.0457494	0.0585626	0.202949
A38	0.113657	0.0399418	0.065115	0.212256
A39	0.129254	0.0513874	0.0782199	0.213497
A40	0.123044	0.0548328	0.064296	0.211325
A41	0.120589	0.0576974	0.064296	0.207473
A42	0.123189	0.0554005	0.0618388	0.210136
A43	0.117918	0.0491622	0.0622483	0.209852
A44	0.123478	0.0460692	0.0704389	0.210679
A45	0.116618	0.0387086	0.0716675	0.212644
A46	0.119217	0.0367053	0.0704389	0.211636
A47	0.111274	0.0477005	0.050372	0.212592
A48	0.120084	0.0598116	0.00491434	0.303053
A49	0.121311	0.0138338	0.0454577	0.211299
A50	0.120589	0.0372077	0.0696198	0.210446
A51	0.121673	0.0745655	0.0634769	0.211636
A52	0.120517	0.0237981	0.0741246	0.216599
A53	0.121311	0.0456646	0.065115	0.212385
A54	0.120734	0.0357199	0.0958297	0.216961
A55	0.118495	0.0415014	0.0618388	0.209438
A56	0.122467	0.0832769	0.0622483	0.206542
A57	0.12716	0.0820893	0.0602007	0.203595
A58	0.11243	0	0.0663436	0.211687
A59	0.119217	0.0408424	0.0597912	0.212178
A60	0.117918	0.0418668	0.0753532	0.212696
A61	0.125283	0.05296	0.0589721	0.199355
A62	0	0.0301995	0.139649	0.227303
A63	0.140664	0.043583	0.244898	0.279733
A64	0.123694	0.0461736	0.0626988	0.209955
A65	0.109108	0.0334817	0.0786295	0.214324
A66	0.120734	0.0389174	0.0638864	0.21042
A67	0.117196	0.0391066	0.065115	0.210343
A68	0.118134	0.0482291	0.0528292	0.210136
A69	0.124272	0.057593	0.0556959	0.207344
A70	0.114957	0.039596	0.0618388	0.212359
A71	0.120806	0.0412208	0.0597912	0.211118
A72	0.1229	0.0485097	0.0622483	0.203724
A73	0.121023	0.0409924	0.0659341	0.213859
A74	0.114235	0.0249008	0.0589721	0.206827
A75	0.127955	0.0524967	0.0810866	0.210963
A76	0.126294	0.0543368	0.0655245	0.200932
A77	0.112502	0.038193	0.0819057	0.215177
A78	0.115535	0.0400854	0.058153	0.212876
A79	0.118423	0.0440789	0.0561054	0.211946
A80	0.123694	0.0506826	0.0864105	0.211687
A81	0.113224	0.0384084	0.0622483	0.217323
A82	0.125933	0.0617692	0.0733056	0.20693
A83	0.109686	0.0450512	0.057334	0.233844
A84	0.123189	0.0599095	0.0438195	0.20737
A85	0.122395	0.0428	0.0757628	0.210705
A86	0.121384	0.039583	0.057334	0.212515
A87	0.126294	0.0454101	0.0675722	0.233456
A88	0.121384	0.0444248	0.0626988	0.210214
A89	0.120517	0.0408228	0.0679817	0.208611
A90	0.120445	0.0408228	0.0679817	0.208559
A91	0.120156	0.0408228	0.0647055	0.208507
A92	0.129254	0.061332	0.0319432	0.206672
A93	0.12355	0.0412404	0.0618388	0.208145
A94	0.117412	0.046787	0.0602007	0.208637
A95	0.124922	0.0547153	0.0614293	0.20587
A96	0.113513	0.047309	0.0274384	0.227484
A97	0.12355	0.0683468	0.0626988	0.208016
A98	0.119001	0.092556	0.0417719	0.214402
A99	0.163265	0.0636225	0.198212	0.428571
A100	0.121023	0.0450838	0.0577435	0.210576
A101	0.120589	0.0432567	0.0716675	0.212256
A102	0.120301	0.0228388	0.185516	0.218823
A103	0.117773	0.0470676	0.0786295	0.225493
A104	0.124128	0.0541541	0.0638864	0.209205
A105	0.126655	0.0609405	0.0614293	0.206258
A106	0.121528	0.0334621	0.160126	0.217349
A107	0.121384	0.0416254	0.0520101	0.21042
A108	0.120084	0.0457038	0.0692103	0.209102
A109	0.122756	0.064523	0.0696198	0.21011
A110	0.121023	0.0501084	0.0626988	0.208947
A111	0.119506	0.0454754	0.0663436	0.212075
A112	0.119001	0.0512177	0.0647055	0.208171
A113	0.131782	0.0551786	0.0552863	0.200881
A114	0.119939	0.0517528	0.0589721	0.206775
A115	0.121023	0.0504673	0.0802676	0.211222
A116	0.109036	0.046291	0.0569245	0.211791
A117	0.120878	0.0375209	0.0470958	0.215927
A118	0.130699	0.111812	0.0561054	0.209981
A119	0.122395	0.0546435	0.0606102	0.210214
A120	0.1229	0.0513939	0.0614293	0.208895
A121	0.112863	0.0445683	0.0622483	0.211791
A122	0.128171	0.102077	0.0741246	0.206361
A123	0.123839	0.0477005	0.0565149	0.226837
A124	0.119867	0.0494689	0.0663436	0.211765
A125	0.110552	0.0360592	0.122449	0.226734
A126	0.118423	0.0334817	0.0675722	0.21298
A127	0.125427	0.0769864	0.0536482	0.209464
A128	0.123694	0.0553939	0.0618388	0.213988
A129	0.117051	0.0361115	0.0814962	0.213316
A130	0.116185	0.0294751	0.0479148	0.211946
A131	0.123983	0.0577953	0.0634769	0.208507
A132	0.130987	0.0435308	0.204355	0.224795
A133	0.110119	0.0257491	0.050372	0.21223
A134	0.123694	0.044229	0.065115	0.208688
A135	0.110986	0.0492275	0.0647055	0.211455
A136	0.125139	0.0525097	0.0548768	0.206206
A137	0.119145	0.0332011	0.0802676	0.213988
A138	0.121745	0.0388913	0.0966487	0.212489
A139	0.115896	0.0395634	0.0716675	0.214479
A140	0.118712	0.0330902	0.0696198	0.212721
max=ti	0.163265	0.163265	0.244898	0.428571									0.428571
min=tai	0	0	0	0									0
d+	C1	C2	C3	C4									S+	Ki+
A1	0.306465	0.390965	0.35977	0.214867									1.27207	0.561515
A2	0.306321	0.379513	0.36878	0.216212									1.27083	0.562064
A3	0.305743	0.379461	0.374923	0.229009									1.28914	0.55408
A4	0.303505	0.381242	0.364685	0.214505									1.26394	0.565127
A5	0.310148	0.385229	0.365094	0.215824									1.2763	0.559655
A6	0.306176	0.383148	0.358542	0.217349									1.26521	0.564556
A7	0.309498	0.383826	0.365504	0.216108									1.27494	0.560252
A8	0.325745	0.392779	0.354037	0.214635									1.2872	0.554916
A9	0.318524	0.39043	0.370418	0.214402									1.29377	0.552094
A10	0.311159	0.265306	0.361818	0.183378									1.12166	0.63681
A11	0.307332	0.380955	0.365872	0.218538									1.2727	0.561237
A12	0.303794	0.374978	0.367142	0.22464									1.27055	0.562184
A13	0.303866	0.369719	0.358542	0.218151									1.25028	0.571302
A14	0.305238	0.37766	0.367551	0.221977									1.27243	0.561357
A15	0.305599	0.362528	0.428571	0.215875									1.31257	0.544187
A16	0.314769	0.381458	0.365872	0.216651									1.27875	0.55858
A17	0.298089	0.356329	0.365094	0.219831									1.23934	0.576342
A18	0.308559	0.386978	0.36837	0.218151									1.28206	0.557139
A19	0.314336	0.384277	0.370008	0.216393									1.28501	0.555858
A20	0.329356	0.397275	0.391713	0.205715									1.32406	0.539466
A21	0.306826	0.392212	0.362227	0.222468									1.28373	0.556412
A22	0.295201	0.379552	0.353627	0.219366									1.24775	0.57246
A23	0.305815	0.401843	0.363046	0.219392									1.2901	0.553668
A24	0.305888	0.382769	0.362637	0.219883									1.27118	0.561909
A25	0.30206	0.372577	0.36878	0.25768									1.3011	0.548987
A26	0.308776	0.378045	0.365094	0.217065									1.26898	0.562881
A27	0.306032	0.382176	0.362637	0.221201									1.27205	0.561525
A28	0.303649	0.378645	0.365872	0.227949									1.27612	0.559734
A29	0.313903	0.394019	0.365872	0.218926									1.29272	0.552544
A30	0.306032	0.380329	0.365872	0.221744									1.27398	0.560673
A31	0.310942	0.379963	0.35977	0.213575									1.26425	0.564987
A32	0.299822	0.368472	0.360999	0.428571									1.45786	0.489953
A33	0.307476	0.380472	0.369599	0.220684									1.27823	0.558807
A34	0.314192	0.402639	0.351989	0.215462									1.28428	0.556175
A35	0.301266	0.353836	0.372056	0.219366									1.24652	0.573022
A36	0.321052	0.395122	0.372466	0.215333									1.30397	0.547777
A37	0.305454	0.382822	0.370008	0.225622									1.28391	0.556337
A38	0.314914	0.388629	0.363456	0.216315									1.28331	0.556594
A39	0.299317	0.377184	0.350351	0.215074									1.24193	0.575143
A40	0.305527	0.373738	0.364275	0.217246									1.26079	0.56654
A41	0.307982	0.370874	0.364275	0.221098									1.26423	0.564997
A42	0.305382	0.373171	0.366732	0.218435									1.26372	0.565224
A43	0.310653	0.379409	0.366323	0.218719									1.2751	0.560178
A44	0.305093	0.382502	0.358132	0.217892									1.26362	0.565269
A45	0.311953	0.389862	0.356904	0.215927									1.27465	0.560379
A46	0.309354	0.391866	0.358132	0.216935									1.27629	0.559659
A47	0.317297	0.38087	0.378199	0.215979									1.29234	0.552705
A48	0.308487	0.368759	0.423657	0.125518									1.22642	0.582414
A49	0.30726	0.414737	0.383113	0.217272									1.32238	0.54015
A50	0.307982	0.391363	0.358951	0.218125									1.27642	0.5596
A51	0.306898	0.354005	0.365094	0.216935									1.24293	0.574677
A52	0.308054	0.404773	0.354446	0.211972									1.27924	0.558365
A53	0.30726	0.382906	0.363456	0.216186									1.26981	0.562514
A54	0.307837	0.392851	0.332741	0.21161									1.24504	0.573705
A55	0.310076	0.38707	0.366732	0.219133									1.28301	0.556726
A56	0.306104	0.345294	0.366323	0.222029									1.23975	0.576153
A57	0.301411	0.346482	0.36837	0.224976									1.24124	0.575462
A58	0.316141	0.428571	0.362227	0.216884									1.32382	0.539562
A59	0.309354	0.387729	0.36878	0.216393									1.28225	0.557054
A60	0.310653	0.386704	0.353218	0.215875									1.26645	0.564005
A61	0.303288	0.375611	0.369599	0.229216									1.27771	0.559034
A62	0.428571	0.398372	0.288922	0.201268									1.31713	0.542303
A63	0.287907	0.384988	0.183673	0.148838									1.00541	0.710444
A64	0.304877	0.382397	0.365872	0.218616									1.27176	0.56165
A65	0.319463	0.395089	0.349942	0.214247									1.27874	0.558585
A66	0.307837	0.389654	0.364685	0.218151									1.28033	0.557893
A67	0.311375	0.389464	0.363456	0.218228									1.28252	0.556937
A68	0.310437	0.380342	0.375742	0.218435									1.28496	0.555883
A69	0.304299	0.370978	0.372875	0.221227									1.26938	0.562704
A70	0.313614	0.388975	0.366732	0.216212									1.28553	0.555633
A71	0.307765	0.38735	0.36878	0.217453									1.28135	0.557448
A72	0.305671	0.380061	0.366323	0.224847									1.2769	0.559389
A73	0.307548	0.387579	0.362637	0.214712									1.27248	0.561335
A74	0.314336	0.40367	0.369599	0.221744									1.30935	0.545527
A75	0.300616	0.376074	0.347484	0.217608									1.24178	0.575209
A76	0.302277	0.374234	0.363046	0.227639									1.2672	0.563673
A77	0.316069	0.390378	0.346665	0.213394									1.26651	0.563981
A78	0.313036	0.388486	0.370418	0.215695									1.28763	0.554727
A79	0.310148	0.384492	0.372466	0.216625									1.28373	0.556413
A80	0.304877	0.377888	0.342161	0.216884									1.24181	0.575197
A81	0.315347	0.390163	0.366323	0.211248									1.28308	0.556696
A82	0.302638	0.366802	0.355265	0.221641									1.24635	0.573103
A83	0.318885	0.38352	0.371237	0.194727									1.26837	0.563152
A84	0.305382	0.368661	0.384751	0.221201									1.28	0.558037
A85	0.306176	0.385771	0.352808	0.217866									1.26262	0.565716
A86	0.307187	0.388988	0.371237	0.216056									1.28347	0.556527
A87	0.302277	0.383161	0.360999	0.195115									1.24155	0.575316
A88	0.307187	0.384146	0.365872	0.218357									1.27556	0.559976
A89	0.308054	0.387748	0.360589	0.21996									1.27635	0.55963
A90	0.308126	0.387748	0.360589	0.220012									1.27648	0.559576
A91	0.308415	0.387748	0.363866	0.220064									1.28009	0.557995
A92	0.299317	0.367239	0.396628	0.221899									1.28508	0.555828
A93	0.305021	0.387331	0.366732	0.220426									1.27951	0.558249
A94	0.311159	0.381784	0.36837	0.219934									1.28125	0.557492
A95	0.303649	0.373856	0.367142	0.222701									1.26735	0.563606
A96	0.315058	0.381262	0.401133	0.201087									1.29854	0.550068
A97	0.305021	0.360224	0.365872	0.220555									1.25167	0.570665
A98	0.30957	0.336015	0.386799	0.214169									1.24655	0.573008
A99	0.265306	0.364949	0.230359	0									0.860614	0.829972
A100	0.307548	0.383487	0.370827	0.217995									1.27986	0.558097
A101	0.307982	0.385314	0.356904	0.216315									1.26651	0.563977
A102	0.30827	0.405732	0.243055	0.209748									1.16681	0.612171
A103	0.310798	0.381503	0.349942	0.203078									1.24532	0.573575
A104	0.304443	0.374417	0.364685	0.219366									1.26291	0.565586
A105	0.301916	0.36763	0.367142	0.222313									1.259	0.567343
A106	0.307043	0.395109	0.268445	0.211222									1.18182	0.604395
A107	0.307187	0.386946	0.376561	0.218151									1.28884	0.554206
A108	0.308487	0.382867	0.359361	0.219469									1.27018	0.562348
A109	0.305815	0.364048	0.358951	0.218461									1.24728	0.572676
A110	0.307548	0.378463	0.365872	0.219624									1.27151	0.561762
A111	0.309065	0.383096	0.362227	0.216496									1.27088	0.562038
A112	0.30957	0.377353	0.363866	0.2204									1.27119	0.561903
A113	0.296789	0.373392	0.373285	0.22769									1.27116	0.561917
A114	0.308632	0.376818	0.369599	0.221796									1.27684	0.559414
A115	0.307548	0.378104	0.348303	0.217349									1.2513	0.570832
A116	0.319535	0.38228	0.371647	0.21678									1.29024	0.553605
A117	0.307693	0.39105	0.381475	0.212644									1.29286	0.552484
A118	0.297872	0.316759	0.372466	0.21859									1.20569	0.59243
A119	0.306176	0.373927	0.367961	0.218357									1.26642	0.564018
A120	0.305671	0.377177	0.367142	0.219676									1.26967	0.562577
A121	0.315708	0.384003	0.366323	0.21678									1.28281	0.556811
A122	0.3004	0.326494	0.354446	0.22221									1.20355	0.593482
A123	0.304732	0.38087	0.372056	0.201734									1.25939	0.567166
A124	0.308704	0.379102	0.362227	0.216806									1.26684	0.563832
A125	0.318019	0.392512	0.306122	0.201837									1.21849	0.586205
A126	0.310148	0.395089	0.360999	0.215591									1.28183	0.55724
A127	0.303144	0.351585	0.374923	0.219107									1.24876	0.571996
A128	0.304877	0.373177	0.366732	0.214583									1.25937	0.567177
A129	0.31152	0.39246	0.347075	0.215255									1.26631	0.564068
A130	0.312386	0.399096	0.380656	0.216625									1.30876	0.545771
A131	0.304588	0.370776	0.365094	0.220064									1.26052	0.566658
A132	0.297584	0.38504	0.224216	0.203776									1.11062	0.643143
A133	0.318452	0.402822	0.378199	0.216341									1.31581	0.542847
A134	0.304877	0.384342	0.363456	0.219883									1.27256	0.561299
A135	0.317585	0.379344	0.363866	0.217116									1.27791	0.558947
A136	0.303432	0.376061	0.373694	0.222365									1.27555	0.559981
A137	0.309426	0.39537	0.348303	0.214583									1.26768	0.563458
A138	0.306826	0.38968	0.331922	0.216082									1.24451	0.573948
A139	0.312675	0.389008	0.356904	0.214092									1.27268	0.561246
A140	0.309859	0.395481	0.358951	0.21585									1.28014	0.557974
min	0.265306	0.265306	0.183673	0									0.714285	1		A1	0.501866	68
RADIS	Ranking Alternatives from Average Distance from the Ideal Solution															A2	0.502761	60
d-	C1	C2	C3	C4									S-	Ki-		A3	0.489614	122
A1	0.122106	0.0376058	0.0688008	0.213704									0.442216	0.442217		A4	0.507737	40
A2	0.12225	0.0490578	0.0597912	0.212359									0.443459	0.443459		A5	0.498822	82
A3	0.122828	0.04911	0.0536482	0.199562									0.425148	0.425149		A6	0.506813	43
A4	0.125066	0.0473286	0.0638864	0.214066									0.450347	0.450348		A7	0.4998	76
A5	0.118423	0.0433416	0.0634769	0.212747									0.437989	0.437989		A8	0.491002	119
A6	0.122395	0.0454232	0.0700294	0.211222									0.449069	0.449069		A9	0.486302	128
A7	0.119073	0.0447445	0.0630674	0.212463									0.439348	0.439348		A10	0.614717	4
A8	0.102826	0.0357917	0.0745342	0.213936									0.427088	0.427089		A11	0.501412	73
A9	0.110047	0.0381408	0.058153	0.214169									0.42051	0.42051		A12	0.502958	59
A10	0.117412	0.163265	0.0667531	0.245193									0.592623	0.592624		A13	0.517655	28
A11	0.121239	0.0476157	0.0626988	0.210033									0.441586	0.441587		A14	0.501608	69
A12	0.124777	0.0535929	0.0614293	0.203931									0.443731	0.443731		A15	0.472949	134
A13	0.124705	0.0588524	0.0700294	0.21042									0.464007	0.464008		A16	0.497057	92
A14	0.123333	0.050911	0.0610197	0.206594									0.441858	0.441859		A17	0.525642	11
A15	0.122972	0.0660434	0	0.212696									0.401711	0.401712		A18	0.494683	103
A16	0.113802	0.0471132	0.0626988	0.21192									0.435534	0.435534		A19	0.492564	116
A17	0.130482	0.0722425	0.0634769	0.20874									0.474941	0.474942		A20	0.464845	139
A18	0.120012	0.0415928	0.0602007	0.21042									0.432226	0.432226		A21	0.493482	112
A19	0.114235	0.0442943	0.0585626	0.212178									0.42927	0.429271		A22	0.519499	26
A20	0.0992154	0.0312957	0.0368576	0.222856									0.390225	0.390225		A23	0.488928	123
A21	0.121745	0.0363594	0.0663436	0.206103									0.430551	0.430551		A24	0.502508	63
A22	0.13337	0.0490187	0.0749437	0.209205									0.466538	0.466539		A25	0.481087	130
A23	0.122756	0.026728	0.0655245	0.209179									0.424188	0.424188		A26	0.504093	54
A24	0.122683	0.0458016	0.0659341	0.208688									0.443107	0.443108		A27	0.501882	67
A25	0.126511	0.0559943	0.0597912	0.170891									0.413187	0.413187		A28	0.498951	80
A26	0.119795	0.050526	0.0634769	0.211506									0.445304	0.445305		A29	0.487054	126
A27	0.122539	0.0463954	0.0659341	0.20737									0.442238	0.442239		A30	0.50049	74
A28	0.124922	0.0499257	0.0626988	0.200622									0.438168	0.438169		A31	0.50751	42
A29	0.114668	0.0345519	0.0626988	0.209645									0.421564	0.421564		A32	0.373187	140
A30	0.122539	0.0482421	0.0626988	0.206827									0.440307	0.440307		A33	0.49743	90
A31	0.117629	0.0486076	0.0688008	0.214996									0.450034	0.450034		A34	0.493089	114
A32	0.128749	0.0600987	0.0675722	0									0.25642	0.25642		A35	0.520391	23
A33	0.121095	0.0480986	0.0589721	0.207887									0.436052	0.436053		A36	0.479045	131
A34	0.114379	0.0259319	0.0765818	0.213109									0.430002	0.430003		A37	0.493358	113
A35	0.127305	0.0747352	0.0565149	0.209205									0.46776	0.467761		A38	0.493782	109
A36	0.107519	0.0334491	0.0561054	0.213238									0.410312	0.410313		A39	0.523751	17
A37	0.123117	0.0457494	0.0585626	0.202949									0.430377	0.430378		A40	0.510019	35
A38	0.113657	0.0399418	0.065115	0.212256									0.43097	0.430971		A41	0.507527	41
A39	0.129254	0.0513874	0.0782199	0.213497									0.472359	0.472359		A42	0.507894	39
A40	0.123044	0.0548328	0.064296	0.211325									0.453498	0.453499		A43	0.499679	77
A41	0.120589	0.0576974	0.064296	0.207473									0.450056	0.450056		A44	0.507967	38
A42	0.123189	0.0554005	0.0618388	0.210136									0.450564	0.450565		A45	0.500009	75
A43	0.117918	0.0491622	0.0622483	0.209852									0.43918	0.43918		A46	0.498828	81
A44	0.123478	0.0460692	0.0704389	0.210679									0.450665	0.450665		A47	0.487322	125
A45	0.116618	0.0387086	0.0716675	0.212644									0.439638	0.439638		A48	0.535139	10
A46	0.119217	0.0367053	0.0704389	0.211636									0.437997	0.437998		A49	0.466027	137
A47	0.111274	0.0477005	0.050372	0.212592									0.421939	0.421939		A50	0.498732	84
A48	0.120084	0.0598116	0.00491434	0.303053									0.487863	0.487863		A51	0.523014	18
A49	0.121311	0.0138338	0.0454577	0.211299									0.391902	0.391903		A52	0.496702	93
A50	0.120589	0.0372077	0.0696198	0.210446									0.437863	0.437864		A53	0.503496	57
A51	0.121673	0.0745655	0.0634769	0.211636									0.47135	0.471351		A54	0.521475	20
A52	0.120517	0.0237981	0.0741246	0.216599									0.435039	0.43504		A55	0.494	107
A53	0.121311	0.0456646	0.065115	0.212385									0.444476	0.444477		A56	0.525344	12
A54	0.120734	0.0357199	0.0958297	0.216961									0.469245	0.469245		A57	0.524254	13
A55	0.118495	0.0415014	0.0618388	0.209438									0.431274	0.431274		A58	0.465012	138
A56	0.122467	0.0832769	0.0622483	0.206542									0.474534	0.474535		A59	0.494542	104
A57	0.12716	0.0820893	0.0602007	0.203595									0.473045	0.473046		A60	0.505919	46
A58	0.11243	0	0.0663436	0.211687									0.390461	0.390461		A61	0.497802	88
A59	0.119217	0.0408424	0.0597912	0.212178									0.432029	0.43203		A62	0.469727	136
A60	0.117918	0.0418668	0.0753532	0.212696									0.447833	0.447834		A63	0.709661	2
A61	0.125283	0.05296	0.0589721	0.199355									0.43657	0.436571		A64	0.502086	66
A62	0	0.0301995	0.139649	0.227303									0.397151	0.397152		A65	0.497064	91
A63	0.140664	0.043583	0.244898	0.279733									0.708878	0.708878		A66	0.495926	99
A64	0.123694	0.0461736	0.0626988	0.209955									0.442522	0.442522		A67	0.494349	105
A65	0.109108	0.0334817	0.0786295	0.214324									0.435544	0.435544		A68	0.492606	115
A66	0.120734	0.0389174	0.0638864	0.21042									0.433958	0.433958		A69	0.503805	55
A67	0.117196	0.0391066	0.065115	0.210343									0.43176	0.43176		A70	0.492193	118
A68	0.118134	0.0482291	0.0528292	0.210136									0.429329	0.429329		A71	0.495193	101
A69	0.124272	0.057593	0.0556959	0.207344									0.444905	0.444905		A72	0.498386	87
A70	0.114957	0.039596	0.0618388	0.212359									0.428751	0.428752		A73	0.501572	70
A71	0.120806	0.0412208	0.0597912	0.211118									0.432936	0.432937		A74	0.475231	133
A72	0.1229	0.0485097	0.0622483	0.203724									0.437382	0.437383		A75	0.523856	15
A73	0.121023	0.0409924	0.0659341	0.213859									0.441808	0.441808		A76	0.505381	50
A74	0.114235	0.0249008	0.0589721	0.206827									0.404935	0.404935		A77	0.50588	47
A75	0.127955	0.0524967	0.0810866	0.210963									0.472501	0.472502		A78	0.490688	120
A76	0.126294	0.0543368	0.0655245	0.200932									0.447088	0.447088		A79	0.493484	111
A77	0.112502	0.038193	0.0819057	0.215177									0.447778	0.447779		A80	0.523836	16
A78	0.115535	0.0400854	0.058153	0.212876									0.42665	0.42665		A81	0.49395	108
A79	0.118423	0.0440789	0.0561054	0.211946									0.430553	0.430554		A82	0.520521	22
A80	0.123694	0.0506826	0.0864105	0.211687									0.472475	0.472475		A83	0.504534	53
A81	0.113224	0.0384084	0.0622483	0.217323									0.431204	0.431204		A84	0.496162	96
A82	0.125933	0.0617692	0.0733056	0.20693									0.467938	0.467938		A85	0.508689	36
A83	0.109686	0.0450512	0.057334	0.233844									0.445915	0.445915		A86	0.493671	110
A84	0.123189	0.0599095	0.0438195	0.20737									0.434288	0.434288		A87	0.524024	14
A85	0.122395	0.0428	0.0757628	0.210705									0.451662	0.451663		A88	0.499349	79
A86	0.121384	0.039583	0.057334	0.212515									0.430815	0.430816		A89	0.498782	83
A87	0.126294	0.0454101	0.0675722	0.233456									0.472732	0.472732		A90	0.498692	85
A88	0.121384	0.0444248	0.0626988	0.210214									0.438721	0.438721		A91	0.496093	97
A89	0.120517	0.0408228	0.0679817	0.208611									0.437932	0.437933		A92	0.492515	117
A90	0.120445	0.0408228	0.0679817	0.208559									0.437808	0.437809		A93	0.496512	94
A91	0.120156	0.0408228	0.0647055	0.208507									0.434192	0.434192		A94	0.495264	100
A92	0.129254	0.061332	0.0319432	0.206672									0.429201	0.429202		A95	0.505272	51
A93	0.12355	0.0412404	0.0618388	0.208145									0.434774	0.434775		A96	0.482906	129
A94	0.117412	0.046787	0.0602007	0.208637									0.433036	0.433037		A97	0.516638	30
A95	0.124922	0.0547153	0.0614293	0.20587									0.446937	0.446937		A98	0.520369	24
A96	0.113513	0.047309	0.0274384	0.227484									0.415744	0.415744		A99	0.841821	1
A97	0.12355	0.0683468	0.0626988	0.208016									0.462612	0.462612		A100	0.496261	95
A98	0.119001	0.092556	0.0417719	0.214402									0.46773	0.467731		A101	0.505874	48
A99	0.163265	0.0636225	0.198212	0.428571									0.85367	0.853671		A102	0.579825	5
A100	0.121023	0.0450838	0.0577435	0.210576									0.434426	0.434426		A103	0.521269	21
A101	0.120589	0.0432567	0.0716675	0.212256									0.44777	0.44777		A104	0.50848	37
A102	0.120301	0.0228388	0.185516	0.218823									0.547478	0.547479		A105	0.511313	31
A103	0.117773	0.0470676	0.0786295	0.225493									0.468963	0.468964		A106	0.56843	6
A104	0.124128	0.0541541	0.0638864	0.209205									0.451373	0.451374		A107	0.489823	121
A105	0.126655	0.0609405	0.0614293	0.206258									0.455283	0.455283		A108	0.503224	58
A106	0.121528	0.0334621	0.160126	0.217349									0.532465	0.532465		A109	0.519843	25
A107	0.121384	0.0416254	0.0520101	0.21042									0.42544	0.42544		A110	0.50227	65
A108	0.120084	0.0457038	0.0692103	0.209102									0.4441	0.4441		A111	0.502719	61
A109	0.122756	0.064523	0.0696198	0.21011									0.467009	0.467009		A112	0.502499	64
A110	0.121023	0.0501084	0.0626988	0.208947									0.442777	0.442777		A113	0.502523	62
A111	0.119506	0.0454754	0.0663436	0.212075									0.4434	0.443401		A114	0.498427	86
A112	0.119001	0.0512177	0.0647055	0.208171									0.443095	0.443096		A115	0.516906	29
A113	0.131782	0.0551786	0.0552863	0.200881									0.443127	0.443128		A116	0.488824	124
A114	0.119939	0.0517528	0.0589721	0.206775									0.437439	0.43744		A117	0.486953	127
A115	0.121023	0.0504673	0.0802676	0.211222									0.462979	0.46298		A118	0.550514	8
A116	0.109036	0.046291	0.0569245	0.211791									0.424042	0.424042		A119	0.50594	45
A117	0.120878	0.0375209	0.0470958	0.215927									0.421422	0.421423		A120	0.503598	56
A118	0.130699	0.111812	0.0561054	0.209981									0.508597	0.508598		A121	0.494141	106
A119	0.122395	0.0546435	0.0606102	0.210214									0.447862	0.447862		A122	0.552108	7
A120	0.1229	0.0513939	0.0614293	0.208895									0.444618	0.444619		A123	0.511029	33
A121	0.112863	0.0445683	0.0622483	0.211791									0.43147	0.431471		A124	0.505639	49
A122	0.128171	0.102077	0.0741246	0.206361									0.510734	0.510734		A125	0.541	9
A123	0.123839	0.0477005	0.0565149	0.226837									0.454892	0.454892		A126	0.494849	102
A124	0.119867	0.0494689	0.0663436	0.211765									0.447445	0.447445		A127	0.518761	27
A125	0.110552	0.0360592	0.122449	0.226734									0.495794	0.495795		A128	0.511046	32
A126	0.118423	0.0334817	0.0675722	0.21298									0.432457	0.432457		A129	0.506022	44
A127	0.125427	0.0769864	0.0536482	0.209464									0.465526	0.465526		A130	0.475646	132
A128	0.123694	0.0553939	0.0618388	0.213988									0.454915	0.454916		A131	0.510211	34
A129	0.117051	0.0361115	0.0814962	0.213316									0.447975	0.447975		A132	0.623406	3
A130	0.116185	0.0294751	0.0479148	0.211946									0.40552	0.405521		A133	0.470659	135
A131	0.123983	0.0577953	0.0634769	0.208507									0.453763	0.453763		A134	0.501513	71
A132	0.130987	0.0435308	0.204355	0.224795									0.603668	0.603668		A135	0.49766	89
A133	0.110119	0.0257491	0.050372	0.21223									0.39847	0.398471		A136	0.499356	78
A134	0.123694	0.044229	0.065115	0.208688									0.441727	0.441727		A137	0.50503	52
A135	0.110986	0.0492275	0.0647055	0.211455									0.436373	0.436373		A138	0.521861	19
A136	0.125139	0.0525097	0.0548768	0.206206									0.438731	0.438732		A139	0.501426	72
A137	0.119145	0.0332011	0.0802676	0.213988									0.446602	0.446603		A140	0.496059	98
A138	0.121745	0.0388913	0.0966487	0.212489									0.469773	0.469774
A139	0.115896	0.0395634	0.0716675	0.214479									0.441606	0.441606
A140	0.118712	0.0330902	0.0696198	0.212721									0.434143	0.434144
max	0.163265	0.163265	0.244898	0.428571									0.999999

## Sheet: 19_06
xij	C1	C2	C3	C4
A1	-3.37	12.57	-1.25	-3.12
A2	-0.08	-1.64	0.11	-0.04
A3	0.21	5.11	0.11	3.88
A4	-0.14	-7.9	-0.13	-1.72
A5	0.3	0.62	-0.05	-0.24
A6	0.27	5.65	0.11	0.37
A7	-1.43	0.51	-1.12	-1.76
A8	1.24	8.5	-0.32	-0.66
A9	1.25	11.63	0.33	-0.37
A10	0.16	22.23	-0.88	-11.21
A11	0.29	2.48	0.15	0.61
A12	0.42	3.72	0.05	2.59
A13	0.08	-0.28	0.02	0.55
A14	-0.5	0.68	-0.49	0.38
A15	0.34	8.51	-0.09	-0.55
A16	0.69	5.22	-0.21	-0.08
A17	0.13	7.45	0.13	1.77
A18	0.3	2.29	0.11	0.46
A19	1.05	14.63	0.24	0.1
A20	0.24	18.4	1.44	-2.98
A21	0.38	9.91	-0.05	1.59
A22	0.08	2.98	-0.04	0.91
A23	0.21	4.74	-0.21	0.78
A24	0.1	2.06	-0.23	0.78
A25	0.01	1.02	0.001	10.54
A26	0.14	-1.39	-0.17	-0.04
A27	0.19	2.33	-0.11	1.04
A28	-0.04	-9.06	-0.01	2.62
A29	-0.97	3.31	-0.91	-0.3
A30	0.04	0.73	-0.06	1.38
A31	0.12	0.07	-0.01	-0.49
A32	-0.54	20.35	-0.06	16.69
A33	0.26	6.69	-0.01	1.3
A34	0.29	-2.6	-0.52	-0.43
A35	0.14	8.16	-0.18	0.47
A36	1.31	4.94	-0.15	-0.56
A37	0.04	-0.16	-0.06	2.44
A38	0.16	-4.84	-0.11	-0.12
A39	-0.14	-3.01	0.01	-0.16
A40	0.43	5.38	-0.04	0.2
A41	-0.06	1.61	-0.6	0.49
A42	-0.02	-11.88	-1.13	0.13
A43	0.43	2.75	0.41	0.68
A44	0.38	7.54	0.18	0.88
A45	0.34	3.07	-0.16	-0.22
A46	0.19	3.93	-0.11	0.14
A47	0.52	-1.95	0.38	-0.03
A48	4.31	1.66	-2.07	-35.02
A49	0.46	13.8	1.28	0.73
A50	0.26	4.36	-0.15	0.29
A51	0.24	10.41	-0.12	0.18
A52	0.1	13.91	0.5	-1.14
A53	0.51	8.35	0.02	-0.06
A54	0.07	1.29	-0.57	-1.58
A55	-0.97	1.82	-0.74	-0.53
A56	0.18	-40.78	0.16	1.94
A57	0.14	6.16	-0.19	2.46
A58	0.47	2.17	0.27	0.29
A59	0.13	8.47	-0.14	-0.19
A60	-0.68	4.59	-1.2	-2.33
A61	-0.14	6.03	0.08	1.97
A62	-12.44	16.02	-6.29	-8.76
A63	-3.13	0.33	-5.44	-29
A64	0.4	13.73	-0.5	0.33
A65	0.99	8.78	0.65	-0.39
A66	0.37	6.84	0.13	0.63
A67	0.02	3.9	-0.14	0.32
A68	-0.16	-12.05	0.12	0.55
A69	0.17	-0.85	0.04	1.06
A70	0.02	5.34	-1.4	-0.73
A71	0.23	0.19	0.15	0.3
A72	0.001	-1.07	0.09	2.29
A73	-0.46	6.38	-2.9	-2.56
A74	-0.1	-3.4	-0.05	1.05
A75	0.34	-0.03	0.22	0.96
A76	1	-0.79	0.46	4.67
A77	-0.8	5.99	-1.51	-3.16
A78	-0.6	11.37	-1.32	-1.44
A79	0.23	-0.21	0.08	0.05
A80	0.25	12.7	-0.82	0.01
A81	-0.29	5.28	-0.14	-1.65
A82	0.41	-3.77	-0.41	-1
A83	0.02	2.26	0.14	-6.07
A84	0.36	6.34	0.14	1.03
A85	0.44	16.07	0.13	0.68
A86	-0.34	7.8	-1.2	-1.77
A87	-0.07	-0.51	-0.05	-5.93
A88	0.29	4.85	0.09	0.58
A89	0.22	2.51	-0.04	0.96
A90	0.22	2.51	-0.04	0.98
A91	0.22	2.51	-0.04	0.96
A92	0.03	-1.14	0.07	1.28
A93	0.23	4.04	0.06	0.83
A94	0.27	4.09	0.06	0.84
A95	0.17	4.71	-0.08	1.18
A96	1.03	1.47	0.09	-4.24
A97	0.11	-11.41	0.07	1.18
A98	0.19	11.36	0.001	-0.64
A99	-1.61	-1.3	1.89	-42.35
A100	0.03	5.7	-0.05	0.38
A101	-0.07	-17.32	0.001	-0.03
A102	0.65	43.84	-2.81	-2.16
A103	3.06	-0.01	-0.36	-4.65
A104	0.07	1.45	-0.55	0.1
A105	0.33	1.69	0.77	3.03
A106	-0.13	-12.39	-0.66	-1.42
A107	0.32	6.27	0.12	0.56
A108	0.31	2.13	-0.09	0.76
A109	0.1	-21.37	0.16	0.7
A110	0.3	0.04	0.01	0.85
A111	0.41	1.87	-0.12	-0.05
A112	0.33	-0.35	0.25	3.92
A113	-0.52	5.54	-0.06	0.93
A114	0.19	-9.86	0.25	1.74
A115	0.25	-0.26	-0.02	0.3
A116	0.62	6.09	0.05	0.08
A117	-0.08	13.61	0.26	-0.68
A118	0.39	3.38	-0.05	0.59
A119	0.15	1.84	-0.64	0.08
A120	0.6	-0.28	0.3	1.53
A121	0.2	7.07	-1.2	-0.31
A122	0.01	-23.03	0.11	1.55
A123	0.49	12.84	-0.21	-3.68
A124	0.14	3.56	-0.06	-0.14
A125	0.001	4.72	-1.01	-4.9
A126	-0.2	-8.45	-1.52	-0.95
A127	-0.12	3.25	-1.5	-0.47
A128	-0.09	-3.23	-0.1	-0.74
A129	0.52	10.49	0.01	-0.19
A130	0.22	2.05	0.03	0.2
A131	0.11	0.47	-0.09	0.94
A132	0.78	9.8	0.7	-1.95
A133	0.39	7.16	-0.43	-0.14
A134	-0.01	2.4	0.03	1.56
A135	0.86	3.43	-0.05	0.16
A136	0.14	1.79	-0.01	1.5
A137	0.4	15.91	0.48	-0.3
A138	0.05	10.34	-1.41	-0.52
A139	0.47	7.74	-0.41	-0.83
A140	0.32	5.43	-0.13	-0.22
MAX	4.31	43.84	1.89	16.69
MIN	-12.44	-40.78	-6.29	-42.35
	1	1	1	1
	Normalizacija
nij	C1	C2	C3	C4
A1	0.541493	0.630466	0.616137	0.664465
A2	0.73791	0.462538	0.782396	0.716633
A3	0.755224	0.542307	0.782396	0.783028
A4	0.734328	0.388561	0.753056	0.688178
A5	0.760597	0.489246	0.762836	0.713245
A6	0.758806	0.548688	0.782396	0.723577
A7	0.657313	0.487946	0.632029	0.6875
A8	0.816716	0.582368	0.729829	0.706131
A9	0.817313	0.619357	0.809291	0.711043
A10	0.752239	0.744623	0.661369	0.527439
A11	0.76	0.511227	0.787286	0.727642
A12	0.767761	0.52588	0.775061	0.761179
A13	0.747463	0.47861	0.771394	0.726626
A14	0.712836	0.489955	0.709046	0.723747
A15	0.762985	0.582486	0.757946	0.707995
A16	0.783881	0.543607	0.743276	0.715955
A17	0.750448	0.56996	0.784841	0.74729
A18	0.760597	0.508981	0.782396	0.725102
A19	0.805373	0.65481	0.798289	0.719004
A20	0.757015	0.699362	0.944988	0.666836
A21	0.765373	0.599031	0.762836	0.744241
A22	0.747463	0.517135	0.764059	0.732724
A23	0.755224	0.537934	0.743276	0.730522
A24	0.748657	0.506263	0.740831	0.730522
A25	0.743284	0.493973	0.769071	0.895833
A26	0.751045	0.465493	0.748166	0.716633
A27	0.75403	0.509454	0.755501	0.734925
A28	0.740299	0.374852	0.767726	0.761687
A29	0.684776	0.521035	0.657702	0.712229
A30	0.745075	0.490546	0.761614	0.740684
A31	0.749851	0.482746	0.767726	0.709011
A32	0.710448	0.722406	0.761614	1
A33	0.758209	0.560978	0.767726	0.739329
A34	0.76	0.451194	0.705379	0.710027
A35	0.751045	0.57835	0.746944	0.725271
A36	0.820896	0.540298	0.750611	0.707825
A37	0.745075	0.480028	0.761614	0.758638
A38	0.752239	0.424722	0.755501	0.715278
A39	0.734328	0.446348	0.770171	0.7146
A40	0.768358	0.545498	0.764059	0.720698
A41	0.739104	0.500945	0.695599	0.72561
A42	0.741493	0.341527	0.630807	0.719512
A43	0.768358	0.514417	0.819071	0.728828
A44	0.765373	0.571023	0.790954	0.732215
A45	0.762985	0.518199	0.749389	0.713584
A46	0.75403	0.528362	0.755501	0.719682
A47	0.773731	0.458875	0.815403	0.716802
A48	1	0.501536	0.515892	0.124153
A49	0.770149	0.645001	0.925428	0.729675
A50	0.758209	0.533444	0.750611	0.722222
A51	0.757015	0.60494	0.754279	0.720359
A52	0.748657	0.646301	0.830073	0.698001
A53	0.773134	0.580596	0.771394	0.716294
A54	0.746866	0.497164	0.699267	0.690549
A55	0.684776	0.503427	0.678484	0.708333
A56	0.753433	0	0.788509	0.750169
A57	0.751045	0.554715	0.745721	0.758977
A58	0.770746	0.507563	0.801956	0.722222
A59	0.750448	0.582014	0.751834	0.714092
A60	0.70209	0.536162	0.622249	0.677846
A61	0.734328	0.553179	0.778729	0.750678
A62	0	0.671236	0	0.568936
A63	0.555821	0.485819	0.103912	0.226118
A64	0.766567	0.644174	0.707824	0.7229
A65	0.801791	0.585677	0.848411	0.710705
A66	0.764776	0.562751	0.784841	0.727981
A67	0.743881	0.528008	0.751834	0.72273
A68	0.733134	0.339518	0.783619	0.726626
A69	0.752836	0.471874	0.773839	0.735264
A70	0.743881	0.545025	0.5978	0.704946
A71	0.756418	0.484165	0.787286	0.722392
A72	0.742746	0.469274	0.779951	0.756098
A73	0.715224	0.557315	0.414425	0.67395
A74	0.736716	0.44174	0.762836	0.735095
A75	0.762985	0.481565	0.795844	0.73357
A76	0.802388	0.472583	0.825183	0.796409
A77	0.694925	0.552706	0.584352	0.663787
A78	0.706866	0.616285	0.607579	0.69292
A79	0.756418	0.479437	0.778729	0.718157
A80	0.757612	0.632002	0.668704	0.71748
A81	0.725373	0.544316	0.751834	0.689363
A82	0.767164	0.437367	0.718826	0.700373
A83	0.743881	0.508627	0.786064	0.614499
A84	0.764179	0.556842	0.786064	0.734756
A85	0.768955	0.671827	0.784841	0.728828
A86	0.722388	0.574096	0.622249	0.687331
A87	0.738507	0.475892	0.762836	0.61687
A88	0.76	0.539234	0.779951	0.727134
A89	0.755821	0.511581	0.764059	0.73357
A90	0.755821	0.511581	0.764059	0.733909
A91	0.755821	0.511581	0.764059	0.73357
A92	0.744478	0.468447	0.777506	0.738991
A93	0.756418	0.529662	0.776284	0.731369
A94	0.758806	0.530253	0.776284	0.731538
A95	0.752836	0.53758	0.759169	0.737297
A96	0.804179	0.499291	0.779951	0.645495
A97	0.749254	0.347081	0.777506	0.737297
A98	0.75403	0.616166	0.769071	0.70647
A99	0.646567	0.466556	1	0
A100	0.744478	0.549279	0.762836	0.723747
A101	0.738507	0.277239	0.769071	0.716802
A102	0.781493	1	0.425428	0.680725
A103	0.925373	0.481801	0.724939	0.63855
A104	0.746866	0.499055	0.701711	0.719004
A105	0.762388	0.501891	0.863081	0.768631
A106	0.734925	0.3355	0.688264	0.693259
A107	0.761791	0.556015	0.783619	0.726795
A108	0.761194	0.507091	0.757946	0.730183
A109	0.748657	0.229378	0.788509	0.729167
A110	0.760597	0.482392	0.770171	0.731707
A111	0.767164	0.504018	0.754279	0.716463
A112	0.762388	0.477783	0.799511	0.783706
A113	0.711642	0.547388	0.761614	0.733062
A114	0.75403	0.365398	0.799511	0.746782
A115	0.757612	0.478847	0.766504	0.722392
A116	0.779701	0.553888	0.775061	0.718665
A117	0.73791	0.642756	0.800733	0.705793
A118	0.76597	0.521862	0.762836	0.727304
A119	0.751642	0.503663	0.690709	0.718665
A120	0.778507	0.47861	0.805623	0.743225
A121	0.754627	0.565469	0.622249	0.71206
A122	0.743284	0.209761	0.782396	0.743564
A123	0.77194	0.633656	0.743276	0.65498
A124	0.751045	0.52399	0.761614	0.714939
A125	0.742746	0.537698	0.645477	0.634316
A126	0.730746	0.382061	0.58313	0.70122
A127	0.735522	0.520326	0.585575	0.70935
A128	0.737313	0.443749	0.756724	0.704776
A129	0.773731	0.605885	0.770171	0.714092
A130	0.755821	0.506145	0.772616	0.720698
A131	0.749254	0.487473	0.757946	0.733232
A132	0.789254	0.597731	0.854523	0.684282
A133	0.76597	0.566533	0.716381	0.714939
A134	0.74209	0.510281	0.772616	0.743733
A135	0.79403	0.522453	0.762836	0.72002
A136	0.751045	0.503073	0.767726	0.742717
A137	0.766567	0.669936	0.827628	0.712229
A138	0.745672	0.604113	0.596577	0.708503
A139	0.770746	0.573387	0.718826	0.703252
A140	0.761791	0.546088	0.753056	0.713584
	0.163265	0.163265	0.244898	0.428571
vij	C1	C2	C3	C4
A1	0.0884068	0.102933	0.150891	0.28477
A2	0.120475	0.0755163	0.191607	0.307128
A3	0.123302	0.0885397	0.191607	0.335583
A4	0.11989	0.0634384	0.184422	0.294933
A5	0.124179	0.0798768	0.186817	0.305676
A6	0.123886	0.0895816	0.191607	0.310104
A7	0.107316	0.0796645	0.154783	0.294643
A8	0.133341	0.0950803	0.178734	0.302627
A9	0.133439	0.101119	0.198194	0.304733
A10	0.122814	0.121571	0.161968	0.226045
A11	0.124081	0.0834654	0.192805	0.311846
A12	0.125349	0.0858579	0.189811	0.326219
A13	0.122034	0.0781403	0.188913	0.311411
A14	0.116381	0.0799925	0.173644	0.310177
A15	0.124569	0.0950996	0.18562	0.303426
A16	0.12798	0.0887519	0.182027	0.306838
A17	0.122522	0.0930545	0.192206	0.320267
A18	0.124179	0.0830988	0.191607	0.310758
A19	0.131489	0.106908	0.195499	0.308144
A20	0.123594	0.114181	0.231426	0.285787
A21	0.124959	0.0978008	0.186817	0.31896
A22	0.122034	0.0844301	0.187116	0.314024
A23	0.123302	0.0878258	0.182027	0.31308
A24	0.122229	0.0826551	0.181428	0.31308
A25	0.121352	0.0806485	0.188344	0.383928
A26	0.122619	0.0759987	0.183224	0.307128
A27	0.123107	0.083176	0.185021	0.314968
A28	0.120865	0.0612003	0.188015	0.326437
A29	0.1118	0.0850668	0.16107	0.305241
A30	0.121645	0.080089	0.186518	0.317436
A31	0.122424	0.0788156	0.188015	0.303861
A32	0.115991	0.117944	0.186518	0.428571
A33	0.123789	0.0915882	0.188015	0.316855
A34	0.124081	0.0736641	0.172746	0.304297
A35	0.122619	0.0944244	0.182925	0.31083
A36	0.134024	0.0882117	0.183823	0.303353
A37	0.121645	0.0783718	0.186518	0.32513
A38	0.122814	0.0693423	0.185021	0.306547
A39	0.11989	0.0728731	0.188613	0.306257
A40	0.125446	0.0890607	0.187116	0.30887
A41	0.12067	0.0817869	0.170351	0.310975
A42	0.12106	0.0557594	0.154483	0.308362
A43	0.125446	0.0839864	0.200589	0.312355
A44	0.124959	0.0932281	0.193703	0.313806
A45	0.124569	0.0846038	0.183524	0.305821
A46	0.123107	0.086263	0.185021	0.308435
A47	0.126323	0.0749182	0.199691	0.307201
A48	0.163265	0.0818833	0.126341	0.0532084
A49	0.125738	0.105306	0.226635	0.312717
A50	0.123789	0.0870927	0.183823	0.309524
A51	0.123594	0.0987655	0.184721	0.308725
A52	0.122229	0.105518	0.203283	0.299143
A53	0.126226	0.0947909	0.188913	0.306983
A54	0.121937	0.0811694	0.171249	0.295949
A55	0.1118	0.082192	0.166159	0.303571
A56	0.123009	0	0.193104	0.321501
A57	0.122619	0.0905656	0.182626	0.325276
A58	0.125836	0.0828673	0.196397	0.309524
A59	0.122522	0.0950225	0.184123	0.306039
A60	0.114627	0.0875364	0.152388	0.290505
A61	0.11989	0.0903148	0.190709	0.321719
A62	0	0.109589	0	0.24383
A63	0.0907461	0.0793172	0.0254478	0.0969076
A64	0.125154	0.105171	0.173345	0.309814
A65	0.130904	0.0956206	0.207774	0.304587
A66	0.124861	0.0918776	0.192206	0.311992
A67	0.12145	0.0862052	0.184123	0.309741
A68	0.119695	0.0554314	0.191907	0.311411
A69	0.122912	0.0770406	0.189512	0.315113
A70	0.12145	0.0889835	0.1464	0.302119
A71	0.123497	0.0790471	0.192805	0.309596
A72	0.121264	0.0766161	0.191008	0.324041
A73	0.116771	0.09099	0.101492	0.288835
A74	0.12028	0.0721206	0.186817	0.31504
A75	0.124569	0.0786227	0.1949	0.314387
A76	0.131002	0.0771563	0.202086	0.341318
A77	0.113457	0.0902376	0.143107	0.28448
A78	0.115406	0.100618	0.148795	0.296965
A79	0.123497	0.0782754	0.190709	0.307781
A80	0.123692	0.103184	0.163764	0.307491
A81	0.118428	0.0888677	0.184123	0.295441
A82	0.125251	0.0714067	0.176039	0.300159
A83	0.12145	0.083041	0.192505	0.263356
A84	0.124764	0.0909129	0.192505	0.314895
A85	0.125543	0.109686	0.192206	0.312355
A86	0.117941	0.0937298	0.152388	0.29457
A87	0.120572	0.0776965	0.186817	0.264373
A88	0.124081	0.0880381	0.191008	0.311629
A89	0.123399	0.0835233	0.187116	0.314387
A90	0.123399	0.0835233	0.187116	0.314532
A91	0.123399	0.0835233	0.187116	0.314387
A92	0.121547	0.076481	0.19041	0.31671
A93	0.123497	0.0864753	0.19011	0.313443
A94	0.123886	0.0865717	0.19011	0.313516
A95	0.122912	0.087768	0.185919	0.315984
A96	0.131294	0.0815167	0.191008	0.27664
A97	0.122327	0.0566662	0.19041	0.315984
A98	0.123107	0.100598	0.188344	0.302773
A99	0.105562	0.0761723	0.244898	0
A100	0.121547	0.0896781	0.186817	0.310177
A101	0.120572	0.0452635	0.188344	0.307201
A102	0.12759	0.163265	0.104186	0.291739
A103	0.151081	0.0786612	0.177536	0.273664
A104	0.121937	0.0814781	0.171848	0.308144
A105	0.124471	0.0819412	0.211367	0.329413
A106	0.119988	0.0547754	0.168554	0.297111
A107	0.124374	0.0907778	0.191907	0.311483
A108	0.124276	0.0827901	0.18562	0.312935
A109	0.122229	0.0374495	0.193104	0.3125
A110	0.124179	0.0787577	0.188613	0.313589
A111	0.125251	0.0822885	0.184721	0.307055
A112	0.124471	0.0780052	0.195799	0.335874
A113	0.116186	0.0893694	0.186518	0.314169
A114	0.123107	0.0596567	0.195799	0.320049
A115	0.123692	0.0781789	0.187715	0.309596
A116	0.127298	0.0904305	0.189811	0.307999
A117	0.120475	0.10494	0.196098	0.302482
A118	0.125056	0.0852019	0.186817	0.311701
A119	0.122717	0.0822306	0.169153	0.307999
A120	0.127103	0.0781403	0.197296	0.318525
A121	0.123204	0.0923213	0.152388	0.305168
A122	0.121352	0.0342467	0.191607	0.31867
A123	0.126031	0.103454	0.182027	0.280705
A124	0.122619	0.0855492	0.186518	0.306402
A125	0.121264	0.0877873	0.158076	0.271849
A126	0.119305	0.0623772	0.142807	0.300522
A127	0.120085	0.0849511	0.143406	0.304007
A128	0.120377	0.0724486	0.18532	0.302047
A129	0.126323	0.0989198	0.188613	0.306039
A130	0.123399	0.0826358	0.189212	0.30887
A131	0.122327	0.0795873	0.18562	0.314242
A132	0.128858	0.0975886	0.209271	0.293263
A133	0.125056	0.092495	0.17544	0.306402
A134	0.121157	0.0833111	0.189212	0.318742
A135	0.129637	0.0852983	0.186817	0.30858
A136	0.122619	0.0821341	0.188015	0.318307
A137	0.125154	0.109377	0.202685	0.305241
A138	0.121742	0.0986304	0.146101	0.303644
A139	0.125836	0.093614	0.176039	0.301393
A140	0.124374	0.0891571	0.184422	0.305821
max=ti	0.163265	0.163265	0.244898	0.428571									0.428571
min=tai	0	0	0	0									0
d+	C1	C2	C3	C4									S+	Ki+
A1	0.340164	0.325638	0.27768	0.143801									1.08728	0.656945
A2	0.308096	0.353055	0.236964	0.121443									1.01956	0.700583
A3	0.305269	0.340031	0.236964	0.0929877									0.975252	0.732411
A4	0.308681	0.365133	0.244149	0.133638									1.0516	0.679236
A5	0.304392	0.348694	0.241754	0.122895									1.01774	0.701838
A6	0.304685	0.338989	0.236964	0.118467									0.999104	0.714925
A7	0.321255	0.348906	0.273788	0.133928									1.07788	0.662677
A8	0.29523	0.333491	0.249837	0.125944									1.0045	0.711084
A9	0.295132	0.327452	0.230377	0.123838									0.9768	0.73125
A10	0.305757	0.307	0.266603	0.202526									1.08189	0.660222
A11	0.30449	0.345106	0.235766	0.116725									1.00209	0.712798
A12	0.303222	0.342713	0.23876	0.102352									0.987047	0.723658
A13	0.306537	0.350431	0.239658	0.11716									1.01379	0.704572
A14	0.31219	0.348578	0.254927	0.118394									1.03409	0.690738
A15	0.304002	0.333471	0.242951	0.125145									1.00557	0.710328
A16	0.300591	0.339819	0.246544	0.121733									1.00869	0.708133
A17	0.306049	0.335517	0.236365	0.108304									0.986235	0.724254
A18	0.304392	0.345472	0.236964	0.117813									1.00464	0.710985
A19	0.297082	0.321663	0.233072	0.120427									0.972244	0.734677
A20	0.304977	0.31439	0.197145	0.142784									0.959296	0.744593
A21	0.303612	0.33077	0.241754	0.109611									0.985747	0.724613
A22	0.306537	0.344141	0.241455	0.114547									1.00668	0.709546
A23	0.305269	0.340745	0.246544	0.115491									1.00805	0.708581
A24	0.306342	0.345916	0.247143	0.115491									1.01489	0.703805
A25	0.307219	0.347922	0.240227	0.0446428									0.940011	0.759869
A26	0.305952	0.352572	0.245347	0.121443									1.02531	0.69665
A27	0.305464	0.345395	0.24355	0.113603									1.00801	0.708607
A28	0.307706	0.367371	0.240556	0.102134									1.01777	0.701816
A29	0.316771	0.343504	0.267501	0.12333									1.05111	0.679555
A30	0.306926	0.348482	0.242053	0.111135									1.0086	0.708197
A31	0.306147	0.349755	0.240556	0.12471									1.02117	0.699478
A32	0.31258	0.310627	0.242053	0									0.86526	0.825514
A33	0.304782	0.336983	0.240556	0.111716									0.994037	0.71857
A34	0.30449	0.354907	0.255825	0.124274									1.0395	0.687146
A35	0.305952	0.334147	0.245646	0.117741									1.00349	0.711804
A36	0.294547	0.340359	0.244748	0.125218									1.00487	0.710822
A37	0.306926	0.350199	0.242053	0.103441									1.00262	0.712419
A38	0.305757	0.359229	0.24355	0.122024									1.03056	0.693104
A39	0.308681	0.355698	0.239958	0.122314									1.02665	0.695743
A40	0.303125	0.33951	0.241455	0.119701									1.00379	0.711588
A41	0.307901	0.346784	0.25822	0.117596									1.0305	0.693143
A42	0.307511	0.372812	0.274088	0.120209									1.07462	0.664686
A43	0.303125	0.344585	0.227982	0.116216									0.991908	0.720112
A44	0.303612	0.335343	0.234868	0.114765									0.988588	0.722531
A45	0.304002	0.343967	0.245047	0.12275									1.01577	0.703198
A46	0.305464	0.342308	0.24355	0.120136									1.01146	0.706193
A47	0.302248	0.353653	0.22888	0.12137									1.00615	0.709918
A48	0.265306	0.346688	0.30223	0.375363									1.28959	0.553887
A49	0.302833	0.323265	0.201936	0.115854									0.943887	0.756749
A50	0.304782	0.341478	0.244748	0.119047									1.01006	0.707174
A51	0.304977	0.329806	0.24385	0.119846									0.998478	0.715374
A52	0.306342	0.323053	0.225288	0.129428									0.98411	0.725818
A53	0.302345	0.33378	0.239658	0.121588									0.997372	0.716167
A54	0.306634	0.347402	0.257322	0.132622									1.04398	0.684195
A55	0.316771	0.346379	0.262412	0.125									1.05056	0.679908
A56	0.305562	0.428571	0.235467	0.10707									1.07667	0.663421
A57	0.305952	0.338005	0.245945	0.103295									0.993198	0.719177
A58	0.302735	0.345704	0.232174	0.119047									0.99966	0.714528
A59	0.306049	0.333549	0.244448	0.122532									1.00658	0.709617
A60	0.313944	0.341035	0.276183	0.138066									1.06923	0.668038
A61	0.308681	0.338256	0.237862	0.106852									0.991651	0.720298
A62	0.428571	0.318982	0.428571	0.184741									1.36087	0.524876
A63	0.337825	0.349254	0.403123	0.331663									1.42187	0.502358
A64	0.303417	0.3234	0.255226	0.118757									1.0008	0.713713
A65	0.297667	0.33295	0.220797	0.123984									0.975398	0.732301
A66	0.30371	0.336693	0.236365	0.116579									0.993348	0.719068
A67	0.307121	0.342366	0.244448	0.11883									1.01277	0.705282
A68	0.308876	0.37314	0.236664	0.11716									1.03584	0.689571
A69	0.305659	0.35153	0.239059	0.113458									1.00971	0.707418
A70	0.307121	0.339588	0.282171	0.126452									1.05533	0.676835
A71	0.305074	0.349524	0.235766	0.118975									1.00934	0.707676
A72	0.307307	0.351955	0.237563	0.10453									1.00135	0.71332
A73	0.3118	0.337581	0.327079	0.139736									1.1162	0.639928
A74	0.308291	0.35645	0.241754	0.113531									1.02003	0.700262
A75	0.304002	0.349948	0.233671	0.114184									1.00181	0.712998
A76	0.297569	0.351415	0.226485	0.0872531									0.962722	0.741943
A77	0.315114	0.338333	0.285464	0.144091									1.083	0.659541
A78	0.313165	0.327953	0.279776	0.131606									1.0525	0.678656
A79	0.305074	0.350296	0.237862	0.12079									1.01402	0.704408
A80	0.304879	0.325387	0.264807	0.12108									1.01615	0.70293
A81	0.310143	0.339703	0.244448	0.13313									1.02742	0.695219
A82	0.30332	0.357164	0.252532	0.128412									1.04143	0.685871
A83	0.307121	0.34553	0.236066	0.165215									1.05393	0.677734
A84	0.303807	0.337658	0.236066	0.113676									0.991207	0.720622
A85	0.303028	0.318885	0.236365	0.116216									0.974494	0.73298
A86	0.31063	0.334841	0.276183	0.134001									1.05566	0.676627
A87	0.307999	0.350874	0.241754	0.164198									1.06483	0.6708
A88	0.30449	0.340533	0.237563	0.116942									0.999527	0.714623
A89	0.305172	0.345048	0.241455	0.114184									1.00586	0.710125
A90	0.305172	0.345048	0.241455	0.114039									1.00571	0.710228
A91	0.305172	0.345048	0.241455	0.114184									1.00586	0.710125
A92	0.307024	0.35209	0.238161	0.111861									1.00914	0.707818
A93	0.305074	0.342096	0.238461	0.115128									1.00076	0.713744
A94	0.304685	0.341999	0.238461	0.115055									1.0002	0.714142
A95	0.305659	0.340803	0.242652	0.112587									1.0017	0.713072
A96	0.297277	0.347054	0.237563	0.151931									1.03382	0.690915
A97	0.306244	0.371905	0.238161	0.112587									1.0289	0.694224
A98	0.305464	0.327973	0.240227	0.125798									0.999462	0.714669
A99	0.323009	0.352399	0.183673	0.428571									1.28765	0.554719
A100	0.307024	0.338893	0.241754	0.118394									1.00606	0.709979
A101	0.307999	0.383308	0.240227	0.12137									1.0529	0.678395
A102	0.300981	0.265306	0.324385	0.136832									1.0275	0.695166
A103	0.27749	0.34991	0.251035	0.154907									1.03334	0.691238
A104	0.306634	0.347093	0.256723	0.120427									1.03088	0.692891
A105	0.3041	0.34663	0.217204	0.0991579									0.967092	0.738591
A106	0.308583	0.373796	0.260017	0.13146									1.07386	0.665159
A107	0.304197	0.337793	0.236664	0.117088									0.995742	0.717339
A108	0.304295	0.345781	0.242951	0.115636									1.00866	0.70815
A109	0.306342	0.391122	0.235467	0.116071									1.049	0.680919
A110	0.304392	0.349813	0.239958	0.114982									1.00915	0.707812
A111	0.30332	0.346283	0.24385	0.121516									1.01497	0.703751
A112	0.3041	0.350566	0.232772	0.0926974									0.980135	0.728762
A113	0.312385	0.339202	0.242053	0.114402									1.00804	0.708587
A114	0.305464	0.368914	0.232772	0.108522									1.01567	0.703263
A115	0.304879	0.350392	0.240856	0.118975									1.0151	0.703658
A116	0.301273	0.33814	0.23876	0.120572									0.998745	0.715182
A117	0.308096	0.323631	0.232473	0.126089									0.990289	0.721289
A118	0.303515	0.343369	0.241754	0.11687									1.00551	0.710372
A119	0.305854	0.34634	0.259418	0.120572									1.03218	0.692013
A120	0.301468	0.350431	0.231275	0.110046									0.99322	0.719161
A121	0.305367	0.33625	0.276183	0.123403									1.0412	0.686019
A122	0.307219	0.394324	0.236964	0.109901									1.04841	0.681304
A123	0.30254	0.325117	0.246544	0.147866									1.02207	0.698863
A124	0.305952	0.343022	0.242053	0.122169									1.0132	0.704982
A125	0.307307	0.340784	0.270495	0.156722									1.07531	0.664261
A126	0.309266	0.366194	0.285764	0.128049									1.08927	0.655745
A127	0.308486	0.34362	0.285165	0.124564									1.06184	0.672689
A128	0.308194	0.356122	0.243251	0.126524									1.03409	0.690737
A129	0.302248	0.329651	0.239958	0.122532									0.994388	0.718316
A130	0.305172	0.345935	0.239359	0.119701									1.01017	0.707096
A131	0.306244	0.348984	0.242951	0.114329									1.01251	0.705461
A132	0.299713	0.330982	0.2193	0.135308									0.985304	0.724939
A133	0.303515	0.336076	0.253131	0.122169									1.01489	0.703805
A134	0.307414	0.34526	0.239359	0.109829									1.00186	0.712958
A135	0.298934	0.343273	0.241754	0.119991									1.00395	0.711474
A136	0.305952	0.346437	0.240556	0.110264									1.00321	0.712
A137	0.303417	0.319194	0.225886	0.12333									0.971828	0.734991
A138	0.306829	0.329941	0.28247	0.124927									1.04417	0.684071
A139	0.302735	0.334957	0.252532	0.127178									1.0174	0.702068
A140	0.304197	0.339414	0.244149	0.12275									1.01051	0.706856
min	0.265306	0.265306	0.183673	0									0.714285	1		A1	0.641973	134
RADIS	Ranking Alternatives from Average Distance from the Ideal Solution															A2	0.697655	91
d-	C1	C2	C3	C4									S-	Ki-		A3	0.735722	10
A1	0.0884068	0.102933	0.150891	0.28477									0.627001	0.627001		A4	0.67096	118
A2	0.120475	0.0755163	0.191607	0.307128									0.694727	0.694727		A5	0.699194	89
A3	0.123302	0.0885397	0.191607	0.335583									0.739032	0.739033		A6	0.715053	33
A4	0.11989	0.0634384	0.184422	0.294933									0.662683	0.662684		A7	0.649542	131
A5	0.124179	0.0798768	0.186817	0.305676									0.696549	0.69655		A8	0.710434	50
A6	0.123886	0.0895816	0.191607	0.310104									0.71518	0.71518		A9	0.734368	12
A7	0.107316	0.0796645	0.154783	0.294643									0.636406	0.636407		A10	0.646311	132
A8	0.133341	0.0950803	0.178734	0.302627									0.709783	0.709783		A11	0.712498	44
A9	0.133439	0.101119	0.198194	0.304733									0.737484	0.737485		A12	0.725448	18
A10	0.122814	0.121571	0.161968	0.226045									0.632398	0.632399		A13	0.702536	79
A11	0.124081	0.0834654	0.192805	0.311846									0.712198	0.712199		A14	0.685467	106
A12	0.125349	0.0858579	0.189811	0.326219									0.727237	0.727237		A15	0.709521	54
A13	0.122034	0.0781403	0.188913	0.311411									0.700498	0.700499		A16	0.706865	67
A14	0.116381	0.0799925	0.173644	0.310177									0.680195	0.680195		A17	0.726152	17
A15	0.124569	0.0950996	0.18562	0.303426									0.708714	0.708715		A18	0.710314	51
A16	0.12798	0.0887519	0.182027	0.306838									0.705597	0.705597		A19	0.738359	8
A17	0.122522	0.0930545	0.192206	0.320267									0.728049	0.72805		A20	0.74979	4
A18	0.124179	0.0830988	0.191607	0.310758									0.709642	0.709643		A21	0.726575	16
A19	0.131489	0.106908	0.195499	0.308144									0.74204	0.742041		A22	0.708576	61
A20	0.123594	0.114181	0.231426	0.285787									0.754988	0.754988		A23	0.707408	64
A21	0.124959	0.0978008	0.186817	0.31896									0.728537	0.728537		A24	0.701599	82
A22	0.122034	0.0844301	0.187116	0.314024									0.707605	0.707606		A25	0.767071	2
A23	0.123302	0.0878258	0.182027	0.31308									0.706235	0.706235		A26	0.692811	95
A24	0.122229	0.0826551	0.181428	0.31308									0.699393	0.699394		A27	0.707439	62
A25	0.121352	0.0806485	0.188344	0.383928									0.774273	0.774274		A28	0.699166	90
A26	0.122619	0.0759987	0.183224	0.307128									0.68897	0.688971		A29	0.671367	117
A27	0.123107	0.083176	0.185021	0.314968									0.706271	0.706272		A30	0.706942	65
A28	0.120865	0.0612003	0.188015	0.326437									0.696517	0.696517		A31	0.696298	93
A29	0.1118	0.0850668	0.16107	0.305241									0.663177	0.663178		A32	0.837269	1
A30	0.121645	0.080089	0.186518	0.317436									0.705687	0.705688		A33	0.719409	27
A31	0.122424	0.0788156	0.188015	0.303861									0.693116	0.693117		A34	0.680967	109
A32	0.115991	0.117944	0.186518	0.428571									0.849024	0.849024		A35	0.711302	47
A33	0.123789	0.0915882	0.188015	0.316855									0.720247	0.720248		A36	0.710117	52
A34	0.124081	0.0736641	0.172746	0.304297									0.674788	0.674789		A37	0.712042	45
A35	0.122619	0.0944244	0.182925	0.31083									0.710799	0.7108		A38	0.688415	101
A36	0.134024	0.0882117	0.183823	0.303353									0.709412	0.709412		A39	0.691689	96
A37	0.121645	0.0783718	0.186518	0.32513									0.711664	0.711665		A40	0.711041	48
A38	0.122814	0.0693423	0.185021	0.306547									0.683725	0.683725		A41	0.688463	100
A39	0.11989	0.0728731	0.188613	0.306257									0.687634	0.687634		A42	0.652176	128
A40	0.125446	0.0890607	0.187116	0.30887									0.710493	0.710494		A43	0.721244	23
A41	0.12067	0.0817869	0.170351	0.310975									0.683783	0.683784		A44	0.724114	19
A42	0.12106	0.0557594	0.154483	0.308362									0.639665	0.639665		A45	0.700858	86
A43	0.125446	0.0839864	0.200589	0.312355									0.722376	0.722376		A46	0.704509	75
A44	0.124959	0.0932281	0.193703	0.313806									0.725696	0.725697		A47	0.709026	59
A45	0.124569	0.0846038	0.183524	0.305821									0.698518	0.698518		A48	0.489293	138
A46	0.123107	0.086263	0.185021	0.308435									0.702825	0.702826		A49	0.763573	3
A47	0.126323	0.0749182	0.199691	0.307201									0.708133	0.708133		A50	0.705701	72
A48	0.163265	0.0818833	0.126341	0.0532084									0.424698	0.424698		A51	0.71559	31
A49	0.125738	0.105306	0.226635	0.312717									0.770397	0.770398		A52	0.727997	14
A50	0.123789	0.0870927	0.183823	0.309524									0.704228	0.704229		A53	0.71654	30
A51	0.123594	0.0987655	0.184721	0.308725									0.715806	0.715807		A54	0.67725	112
A52	0.122229	0.105518	0.203283	0.299143									0.730174	0.730175		A55	0.671816	116
A53	0.126226	0.0947909	0.188913	0.306983									0.716912	0.716913		A56	0.650518	130
A54	0.121937	0.0811694	0.171249	0.295949									0.670305	0.670305		A57	0.720132	24
A55	0.1118	0.082192	0.166159	0.303571									0.663723	0.663723		A58	0.714576	36
A56	0.123009	0	0.193104	0.321501									0.637614	0.637615		A59	0.708662	60
A57	0.122619	0.0905656	0.182626	0.325276									0.721086	0.721087		A60	0.656547	126
A58	0.125836	0.0828673	0.196397	0.309524									0.714624	0.714625		A61	0.721466	22
A59	0.122522	0.0950225	0.184123	0.306039									0.707706	0.707707		A62	0.439148	139
A60	0.114627	0.0875364	0.152388	0.290505									0.645056	0.645056		A63	0.397388	140
A61	0.11989	0.0903148	0.190709	0.321719									0.722633	0.722633		A64	0.713599	39
A62	0	0.109589	0	0.24383									0.353419	0.353419		A65	0.735594	11
A63	0.0907461	0.0793172	0.0254478	0.0969076									0.292419	0.292419		A66	0.720003	26
A64	0.125154	0.105171	0.173345	0.309814									0.713483	0.713484		A67	0.703401	77
A65	0.130904	0.0956206	0.207774	0.304587									0.738886	0.738887		A68	0.684008	108
A66	0.124861	0.0918776	0.192206	0.311992									0.720936	0.720937		A69	0.705998	71
A67	0.12145	0.0862052	0.184123	0.309741									0.701519	0.701519		A70	0.667894	122
A68	0.119695	0.0554314	0.191907	0.311411									0.678444	0.678445		A71	0.70631	70
A69	0.122912	0.0770406	0.189512	0.315113									0.704577	0.704577		A72	0.713125	40
A70	0.12145	0.0889835	0.1464	0.302119									0.658952	0.658953		A73	0.619009	136
A71	0.123497	0.0790471	0.192805	0.309596									0.704945	0.704945		A74	0.69726	92
A72	0.121264	0.0766161	0.191008	0.324041									0.712931	0.712931		A75	0.712739	42
A73	0.116771	0.09099	0.101492	0.288835									0.598088	0.598089		A76	0.746753	5
A74	0.12028	0.0721206	0.186817	0.31504									0.694258	0.694259		A77	0.645412	133
A75	0.124569	0.0786227	0.1949	0.314387									0.712479	0.71248		A78	0.670221	119
A76	0.131002	0.0771563	0.202086	0.341318									0.751562	0.751563		A79	0.702336	80
A77	0.113457	0.0902376	0.143107	0.28448									0.631281	0.631282		A80	0.700531	87
A78	0.115406	0.100618	0.148795	0.296965									0.661785	0.661785		A81	0.691039	97
A79	0.123497	0.0782754	0.190709	0.307781									0.700262	0.700263		A82	0.679364	111
A80	0.123692	0.103184	0.163764	0.307491									0.698131	0.698131		A83	0.669043	121
A81	0.118428	0.0888677	0.184123	0.295441									0.686859	0.68686		A84	0.72185	21
A82	0.125251	0.0714067	0.176039	0.300159									0.672856	0.672857		A85	0.736385	9
A83	0.12145	0.083041	0.192505	0.263356									0.660352	0.660353		A86	0.667628	123
A84	0.124764	0.0909129	0.192505	0.314895									0.723077	0.723078		A87	0.66013	125
A85	0.125543	0.109686	0.192206	0.312355									0.73979	0.739791		A88	0.71469	35
A86	0.117941	0.0937298	0.152388	0.29457									0.658628	0.658629		A89	0.709276	56
A87	0.120572	0.0776965	0.186817	0.264373									0.649459	0.649459		A90	0.7094	55
A88	0.124081	0.0880381	0.191008	0.311629									0.714757	0.714757		A91	0.709276	56
A89	0.123399	0.0835233	0.187116	0.314387									0.708426	0.708427		A92	0.706483	68
A90	0.123399	0.0835233	0.187116	0.314532									0.708571	0.708572		A93	0.713635	38
A91	0.123399	0.0835233	0.187116	0.314387									0.708426	0.708427		A94	0.714114	37
A92	0.121547	0.076481	0.19041	0.31671									0.705148	0.705148		A95	0.712828	41
A93	0.123497	0.0864753	0.19011	0.313443									0.713526	0.713526		A96	0.685688	105
A94	0.123886	0.0865717	0.19011	0.313516									0.714084	0.714085		A97	0.689806	99
A95	0.122912	0.087768	0.185919	0.315984									0.712583	0.712583		A98	0.714746	34
A96	0.131294	0.0815167	0.191008	0.27664									0.68046	0.68046		A99	0.490676	137
A97	0.122327	0.0566662	0.19041	0.315984									0.685387	0.685387		A100	0.709099	58
A98	0.123107	0.100598	0.188344	0.302773									0.714822	0.714822		A101	0.669888	120
A99	0.105562	0.0761723	0.244898	0									0.426632	0.426633		A102	0.690974	98
A100	0.121547	0.0896781	0.186817	0.310177									0.708219	0.70822		A103	0.686091	104
A101	0.120572	0.0452635	0.188344	0.307201									0.66138	0.661381		A104	0.688149	102
A102	0.12759	0.163265	0.104186	0.291739									0.686781	0.686781		A105	0.742892	6
A103	0.151081	0.0786612	0.177536	0.273664									0.680942	0.680943		A106	0.652794	127
A104	0.121937	0.0814781	0.171848	0.308144									0.683407	0.683408		A107	0.717941	29
A105	0.124471	0.0819412	0.211367	0.329413									0.747192	0.747193		A108	0.706886	66
A106	0.119988	0.0547754	0.168554	0.297111									0.640428	0.640429		A109	0.673101	115
A107	0.124374	0.0907778	0.191907	0.311483									0.718542	0.718542		A110	0.706475	69
A108	0.124276	0.0827901	0.18562	0.312935									0.705621	0.705622		A111	0.701534	83
A109	0.122229	0.0374495	0.193104	0.3125									0.665283	0.665283		A112	0.731456	13
A110	0.124179	0.0787577	0.188613	0.313589									0.705138	0.705139		A113	0.707415	63
A111	0.125251	0.0822885	0.184721	0.307055									0.699316	0.699317		A114	0.700937	85
A112	0.124471	0.0780052	0.195799	0.335874									0.734149	0.73415		A115	0.70142	84
A113	0.116186	0.0893694	0.186518	0.314169									0.706242	0.706243		A116	0.715361	32
A114	0.123107	0.0596567	0.195799	0.320049									0.698611	0.698612		A117	0.722642	20
A115	0.123692	0.0781789	0.187715	0.309596									0.699182	0.699182		A118	0.709575	53
A116	0.127298	0.0904305	0.189811	0.307999									0.715539	0.715539		A119	0.687057	103
A117	0.120475	0.10494	0.196098	0.302482									0.723995	0.723996		A120	0.720112	25
A118	0.125056	0.0852019	0.186817	0.311701									0.708776	0.708777		A121	0.67955	110
A119	0.122717	0.0822306	0.169153	0.307999									0.6821	0.6821		A122	0.67359	114
A120	0.127103	0.0781403	0.197296	0.318525									0.721064	0.721064		A123	0.69554	94
A121	0.123204	0.0923213	0.152388	0.305168									0.673081	0.673082		A124	0.703036	78
A122	0.121352	0.0342467	0.191607	0.31867									0.665876	0.665877		A125	0.65162	129
A123	0.126031	0.103454	0.182027	0.280705									0.692217	0.692218		A126	0.640379	135
A124	0.122619	0.0855492	0.186518	0.306402									0.701088	0.701089		A127	0.662569	124
A125	0.121264	0.0877873	0.158076	0.271849									0.638977	0.638978		A128	0.685465	107
A126	0.119305	0.0623772	0.142807	0.300522									0.625012	0.625013		A129	0.719106	28
A127	0.120085	0.0849511	0.143406	0.304007									0.652449	0.652449		A130	0.705607	73
A128	0.120377	0.0724486	0.18532	0.302047									0.680193	0.680194		A131	0.703619	76
A129	0.126323	0.0989198	0.188613	0.306039									0.719896	0.719896		A132	0.72696	15
A130	0.123399	0.0826358	0.189212	0.30887									0.704117	0.704118		A133	0.7016	81
A131	0.122327	0.0795873	0.18562	0.314242									0.701776	0.701776		A134	0.712691	43
A132	0.128858	0.0975886	0.209271	0.293263									0.72898	0.728981		A135	0.710903	49
A133	0.125056	0.092495	0.17544	0.306402									0.699394	0.699394		A136	0.711538	46
A134	0.121157	0.0833111	0.189212	0.318742									0.712423	0.712424		A137	0.738724	7
A135	0.129637	0.0852983	0.186817	0.30858									0.710333	0.710333		A138	0.677094	113
A136	0.122619	0.0821341	0.188015	0.318307									0.711075	0.711076		A139	0.699476	88
A137	0.125154	0.109377	0.202685	0.305241									0.742456	0.742457		A140	0.705316	74
A138	0.121742	0.0986304	0.146101	0.303644									0.670117	0.670117
A139	0.125836	0.093614	0.176039	0.301393									0.696882	0.696883
A140	0.124374	0.0891571	0.184422	0.305821									0.703774	0.703775
max	0.163265	0.163265	0.244898	0.428571									0.999999

## Sheet: 19_09
xij	C1	C2	C3	C4
A1	5.05	2.07	1.34	2.8
A2	0.21	2.55	0.13	0.001
A3	0.32	7.41	0.11	0.8
A4	0.06	-10.31	0.5	0.69
A5	0.42	2.73	0.05	0.01
A6	0.35	5.12	-0.01	0.06
A7	1.91	1.46	1.04	1.55
A8	0.55	6.51	0.03	-0.05
A9	0.48	7.58	-0.18	-0.33
A10	-0.02	-14.79	0.74	2.68
A11	0.28	2.83	-0.02	0.13
A12	0.42	5.43	0.1	0.69
A13	0.29	-0.43	0.37	0.38
A14	0.78	0.6	0.54	1.64
A15	0.1	10.24	-0.08	-0.07
A16	0.75	2.71	0.34	0.16
A17	0.44	12.29	0.27	0.85
A18	0.45	1.5	0.13	0.23
A19	0.62	3.13	0.05	-0.1
A20	3.61	0.11	1.54	-0.14
A21	1.24	8.39	0.34	0.86
A22	0.88	1.66	0.18	0.65
A23	0.44	14.72	0.05	0.4
A24	0.25	6.51	0.16	0.51
A25	-0.07	-6.88	0.09	3.65
A26	0.43	-3.36	0.36	0.27
A27	0.17	-1.14	0.09	0.52
A28	0.13	1.68	0.13	1.09
A29	1.83	-1.22	1.01	1.17
A30	0.21	-2.92	0.27	0.5
A31	1.46	-0.03	4.43	2.35
A32	0.16	-2.41	-0.02	-154.94
A33	0.5	9.17	0.06	0.3
A34	0.36	1.79	0.15	-0.01
A35	0.57	3.74	0.82	1.44
A36	0.95	-0.39	0.12	0.07
A37	0.27	0.01	0.11	0.55
A38	0.36	-3.09	0.17	0.07
A39	-0.52	-2.91	-0.4	-0.71
A40	0.62	0.94	0.22	0.2
A41	0.76	2.29	0.8	1.25
A42	0.42	-10.23	2.78	0.93
A43	0.3	8.43	-0.2	0.12
A44	0.41	5.57	0.23	0.25
A45	0.4	3.01	0.08	0.03
A46	0.36	-0.28	-0.07	0.05
A47	0.24	-8.17	0.3	-0.07
A48	2.18	-1.11	0.74	0.55
A49	0.94	7.26	4.87	0.7
A50	0.67	10.1	0.91	0.48
A51	0.3	-0.94	0.59	0.11
A52	0.69	5.13	-0.27	-0.53
A53	1.05	6.6	0.39	0.17
A54	0.4	4.32	-0.04	-0.17
A55	1.06	0.78	0.74	1.37
A56	0.41	28.06	0.11	0.23
A57	0.1	-4.08	0.33	0.63
A58	0.76	2.15	0.05	0
A59	0.88	3.15	0.28	0.21
A60	1.24	2.77	0.83	1.86
A61	0.73	6.97	0.42	3.42
A62	16.56	7.16	5.25	3.18
A63	3.47	0.42	5.63	9.56
A64	1.22	5.91	1.69	1.01
A65	0.8	6.61	-1.04	-0.34
A66	0.72	4.05	0.08	0.18
A67	0.6	2.61	0.08	0.26
A68	0.22	-10.93	0.35	0.33
A69	0.22	2.98	0.15	0.53
A70	0.86	4.46	1.12	0.52
A71	0.4	-0.16	1.64	0.37
A72	0.21	0.61	-0.04	0.66
A73	1.01	3.84	3.75	2.25
A74	0.09	-7.21	0.12	0.73
A75	3.01	4.26	0.47	1.17
A76	0.89	1.26	0.37	1.28
A77	2.51	2.69	1.17	2.07
A78	2.47	7.18	1.87	1.47
A79	0.3	-11.67	0.71	0.2
A80	0.2	1.29	-0.85	0.01
A81	0.91	2.54	0.09	-0.28
A82	0.25	13.03	0.03	1.42
A83	0.22	0.6	-0.24	-1.92
A84	0.38	6.29	0.56	0.56
A85	0.43	3.63	0.21	0.18
A86	2.3	0.93	1.83	2.07
A87	2.14	1.27	0.45	-0.83
A88	0.1	3.69	0.04	-0.03
A89	0.13	0.9	-0.01	0.31
A90	0.13	0.9	-0.01	0.3
A91	0.13	0.9	-0.01	0.29
A92	0.51	0.91	0.26	0.51
A93	0.42	10.59	0.25	0.34
A94	0.61	0.66	0.07	0.33
A95	0.37	4.07	0.2	0.95
A96	0.89	3.72	0.17	-1.17
A97	0.47	25.96	-0.02	0.36
A98	0.5	-5.69	0.99	-0.02
A99	2.95	0.2	1.01	-14.99
A100	0.55	2.94	0.12	0.24
A101	0.4	0.01	0.24	0.07
A102	0.76	10.15	-0.15	-0.2
A103	1.28	3.57	0.66	0.69
A104	0.85	1.59	1.1	1.24
A105	-0.05	-0.98	-0.18	-0.26
A106	0.41	27.71	-0.45	-0.3
A107	0.18	4.32	-0.3	-0.08
A108	0.5	3.32	0.07	0.4
A109	0.29	-5.52	0.32	0.1
A110	0.42	0.1	0.13	0.37
A111	0.83	1.97	0.24	0.08
A112	3.86	2.13	1.45	9.69
A113	3.32	-1.88	0.18	1.76
A114	0.47	-7.02	0.07	0.38
A115	0.41	4.62	0.3	0.04
A116	0.81	1.85	0.08	0.01
A117	-0.25	14.01	-0.61	-1.08
A118	0.68	4.87	0.45	0.38
A119	0.19	1.01	-0.06	0.18
A120	-0.02	1.74	-0.1	-0.2
A121	0.82	1.87	1.36	0.46
A122	0.06	-3.43	0.19	0.62
A123	0.54	0.66	0.1	-1.25
A124	0.24	2.01	0.24	0.34
A125	0.97	15.61	-0.26	-0.77
A126	0.71	2.8	1.33	0.59
A127	0.65	1.6	1.56	1.4
A128	0.07	0.17	-0.06	-0.19
A129	0.73	4.98	-0.21	-0.11
A130	0.78	3.04	0.77	0.17
A131	0.38	4	0.23	0.38
A132	-0.21	18.75	-0.74	-0.91
A133	0.5	-1.07	0.56	0.12
A134	0.27	6.58	0.02	0.17
A135	0.45	2.3	0.19	0.07
A136	0.13	-0.98	0.14	0.59
A137	0.47	6.05	-0.47	-0.31
A138	0.41	3.42	0.97	0.44
A139	0.77	5.85	0.57	0.18
A140	0.21	-5.24	0.3	0.04
MAX	16.56	28.06	5.63	9.69
MIN	-0.52	-14.79	-1.04	-154.94
	1	1	1	1
	Normalizacija
nij	C1	C2	C3	C4
A1	0.326112	0.393466	0.356822	0.958149
A2	0.04274	0.404667	0.175412	0.941147
A3	0.0491803	0.518086	0.172414	0.946
A4	0.0339578	0.104551	0.230885	0.945332
A5	0.0550351	0.408868	0.163418	0.941201
A6	0.0509368	0.464644	0.154423	0.941505
A7	0.142272	0.37923	0.311844	0.950556
A8	0.0626464	0.497083	0.16042	0.940837
A9	0.058548	0.522054	0.128936	0.939136
A10	0.029274	0	0.266867	0.95742
A11	0.0468384	0.411202	0.152924	0.94193
A12	0.0550351	0.471879	0.170915	0.945332
A13	0.0474239	0.335123	0.211394	0.943449
A14	0.0761124	0.35916	0.236882	0.951102
A15	0.0362998	0.584131	0.143928	0.940716
A16	0.074356	0.408401	0.206897	0.942113
A17	0.0562061	0.631972	0.196402	0.946304
A18	0.0567916	0.380163	0.175412	0.942538
A19	0.0667447	0.418203	0.163418	0.940533
A20	0.241803	0.347725	0.386807	0.94029
A21	0.103044	0.540957	0.206897	0.946365
A22	0.0819672	0.383897	0.182909	0.945089
A23	0.0562061	0.688681	0.163418	0.94357
A24	0.045082	0.497083	0.17991	0.944239
A25	0.0263466	0.184597	0.169415	0.963312
A26	0.0556206	0.266744	0.209895	0.942781
A27	0.0403981	0.318553	0.169415	0.944299
A28	0.0380562	0.384364	0.175412	0.947762
A29	0.137588	0.316686	0.307346	0.948248
A30	0.04274	0.277013	0.196402	0.944178
A31	0.115925	0.344457	0.82009	0.955415
A32	0.0398126	0.288915	0.152924	0
A33	0.059719	0.55916	0.164918	0.942963
A34	0.0515222	0.386931	0.178411	0.94108
A35	0.0638173	0.432439	0.278861	0.949888
A36	0.0860656	0.336056	0.173913	0.941566
A37	0.0462529	0.345391	0.172414	0.944482
A38	0.0515222	0.273046	0.181409	0.941566
A39	0	0.277246	0.095952	0.936828
A40	0.0667447	0.367095	0.188906	0.942356
A41	0.0749415	0.3986	0.275862	0.948734
A42	0.0550351	0.106418	0.572714	0.94679
A43	0.0480094	0.54189	0.125937	0.94187
A44	0.0544496	0.475146	0.190405	0.942659
A45	0.0538642	0.415403	0.167916	0.941323
A46	0.0515222	0.338623	0.145427	0.941444
A47	0.0444965	0.154492	0.2009	0.940716
A48	0.15808	0.319253	0.266867	0.944482
A49	0.0854801	0.514586	0.886057	0.945393
A50	0.0696721	0.580863	0.292354	0.944056
A51	0.0480094	0.323221	0.244378	0.941809
A52	0.0708431	0.464877	0.115442	0.937921
A53	0.0919204	0.499183	0.214393	0.942173
A54	0.0538642	0.445974	0.149925	0.940108
A55	0.0925059	0.363361	0.266867	0.949462
A56	0.0544496	1	0.172414	0.942538
A57	0.0362998	0.249942	0.205397	0.944968
A58	0.0749415	0.395333	0.163418	0.941141
A59	0.0819672	0.41867	0.197901	0.942416
A60	0.103044	0.409802	0.28036	0.952439
A61	0.073185	0.507818	0.218891	0.961915
A62	1	0.512252	0.943028	0.960457
A63	0.233607	0.354959	1	0.99921
A64	0.101874	0.483081	0.409295	0.947276
A65	0.0772834	0.499417	0	0.939076
A66	0.0725995	0.439673	0.167916	0.942234
A67	0.0655738	0.406068	0.167916	0.94272
A68	0.0433255	0.0900817	0.208396	0.943145
A69	0.0433255	0.414702	0.178411	0.94436
A70	0.0807963	0.449242	0.323838	0.944299
A71	0.0538642	0.341424	0.401799	0.943388
A72	0.04274	0.359393	0.149925	0.94515
A73	0.0895785	0.434772	0.718141	0.954808
A74	0.0357143	0.176896	0.173913	0.945575
A75	0.206674	0.444574	0.226387	0.948248
A76	0.0825527	0.374562	0.211394	0.948916
A77	0.1774	0.407935	0.331334	0.953714
A78	0.175059	0.512719	0.436282	0.95007
A79	0.0480094	0.0728121	0.262369	0.942356
A80	0.0421546	0.375263	0.0284858	0.941201
A81	0.0837237	0.404434	0.169415	0.93944
A82	0.045082	0.649242	0.16042	0.949766
A83	0.0433255	0.35916	0.11994	0.929478
A84	0.0526932	0.491949	0.23988	0.944542
A85	0.0556206	0.429872	0.187406	0.942234
A86	0.165105	0.366861	0.430285	0.953714
A87	0.155738	0.374796	0.223388	0.936099
A88	0.0362998	0.431272	0.161919	0.940959
A89	0.0380562	0.366161	0.154423	0.943024
A90	0.0380562	0.366161	0.154423	0.942963
A91	0.0380562	0.366161	0.154423	0.942902
A92	0.0603044	0.366394	0.194903	0.944239
A93	0.0550351	0.592299	0.193403	0.943206
A94	0.0661593	0.36056	0.166417	0.943145
A95	0.0521077	0.44014	0.185907	0.946911
A96	0.0825527	0.431972	0.181409	0.934034
A97	0.0579625	0.950992	0.152924	0.943327
A98	0.059719	0.212369	0.304348	0.941019
A99	0.203162	0.349825	0.307346	0.850088
A100	0.0626464	0.413769	0.173913	0.942599
A101	0.0538642	0.345391	0.191904	0.941566
A102	0.0749415	0.58203	0.133433	0.939926
A103	0.105386	0.428471	0.254873	0.945332
A104	0.0802108	0.382264	0.32084	0.948673
A105	0.0275176	0.322287	0.128936	0.939561
A106	0.0544496	0.991832	0.0884558	0.939318
A107	0.0409836	0.445974	0.110945	0.940655
A108	0.059719	0.422637	0.166417	0.94357
A109	0.0474239	0.216336	0.203898	0.941748
A110	0.0550351	0.347491	0.175412	0.943388
A111	0.0790398	0.391132	0.191904	0.941627
A112	0.25644	0.394866	0.373313	1
A113	0.224824	0.301284	0.182909	0.951831
A114	0.0579625	0.18133	0.166417	0.943449
A115	0.0544496	0.452975	0.2009	0.941384
A116	0.0778689	0.388331	0.167916	0.941201
A117	0.015808	0.672112	0.0644678	0.934581
A118	0.0702576	0.45881	0.223388	0.943449
A119	0.0415691	0.368728	0.146927	0.942234
A120	0.029274	0.385764	0.14093	0.939926
A121	0.0784543	0.388798	0.35982	0.943935
A122	0.0339578	0.265111	0.184408	0.944907
A123	0.0620609	0.36056	0.170915	0.933548
A124	0.0444965	0.392065	0.191904	0.943206
A125	0.0872365	0.709452	0.116942	0.936464
A126	0.0720141	0.410502	0.355322	0.944725
A127	0.0685012	0.382497	0.389805	0.949645
A128	0.0345433	0.349125	0.146927	0.939987
A129	0.073185	0.461377	0.124438	0.940473
A130	0.0761124	0.416103	0.271364	0.942173
A131	0.0526932	0.438506	0.190405	0.943449
A132	0.0181499	0.78273	0.0449775	0.935613
A133	0.059719	0.320187	0.23988	0.94187
A134	0.0462529	0.498716	0.158921	0.942173
A135	0.0567916	0.398833	0.184408	0.941566
A136	0.0380562	0.322287	0.176912	0.944725
A137	0.0579625	0.486348	0.0854573	0.939258
A138	0.0544496	0.424971	0.301349	0.943813
A139	0.0755269	0.48168	0.241379	0.942234
A140	0.04274	0.22287	0.2009	0.941384
	0.163265	0.163265	0.244898	0.428571
vij	C1	C2	C3	C4
A1	0.0532427	0.0642392	0.0873849	0.410635
A2	0.00697795	0.066068	0.0429581	0.403348
A3	0.00802943	0.0845854	0.0422238	0.405428
A4	0.00554413	0.0170695	0.0565432	0.405142
A5	0.00898531	0.0667539	0.0400208	0.403372
A6	0.00831619	0.0758601	0.0378178	0.403502
A7	0.023228	0.061915	0.07637	0.407381
A8	0.010228	0.0811562	0.0392865	0.403215
A9	0.00955884	0.0852331	0.0315761	0.402487
A10	0.00477942	0	0.0653551	0.410322
A11	0.00764707	0.0671349	0.0374507	0.403684
A12	0.00898531	0.0770413	0.0418566	0.405142
A13	0.00774266	0.0547138	0.05177	0.404335
A14	0.0124265	0.0586382	0.0580118	0.407615
A15	0.00592648	0.0953681	0.0352477	0.403163
A16	0.0121397	0.0666777	0.0506686	0.403762
A17	0.00917649	0.103179	0.0480984	0.405558
A18	0.00927208	0.0620674	0.0429581	0.403944
A19	0.0108971	0.0682779	0.0400208	0.403085
A20	0.039478	0.0567713	0.0947282	0.402981
A21	0.0168236	0.0883193	0.0506686	0.405584
A22	0.0133824	0.062677	0.0447939	0.405038
A23	0.00917649	0.112438	0.0400208	0.404387
A24	0.00736031	0.0811562	0.0440596	0.404673
A25	0.00430148	0.0301383	0.0414895	0.412847
A26	0.0090809	0.04355	0.0514029	0.404049
A27	0.0065956	0.0520086	0.0414895	0.404699
A28	0.00621325	0.0627532	0.0429581	0.406183
A29	0.0224633	0.0517038	0.0752685	0.406391
A30	0.00697795	0.0452265	0.0480984	0.404647
A31	0.0189265	0.0562378	0.200838	0.409463
A32	0.00650001	0.0471697	0.0374507	0
A33	0.00975002	0.0912912	0.040388	0.404127
A34	0.00841178	0.0631723	0.0436924	0.40332
A35	0.0104191	0.0706021	0.0682924	0.407094
A36	0.0140515	0.0548662	0.042591	0.403528
A37	0.00755148	0.0563902	0.0422238	0.404777
A38	0.00841178	0.0445788	0.0444268	0.403528
A39	0	0.0452646	0.0234985	0.401497
A40	0.0108971	0.0599337	0.0462626	0.403866
A41	0.0122353	0.0650774	0.0675581	0.4066
A42	0.00898531	0.0173743	0.140256	0.405767
A43	0.00783825	0.0884717	0.0308417	0.403658
A44	0.00888972	0.0775747	0.0466298	0.403996
A45	0.00879413	0.0678207	0.0411223	0.403424
A46	0.00841178	0.0552853	0.0356149	0.403476
A47	0.00726472	0.0252232	0.0491999	0.403163
A48	0.0258089	0.0521229	0.0653551	0.404777
A49	0.0139559	0.0840138	0.216994	0.405168
A50	0.011375	0.0948347	0.0715969	0.404595
A51	0.00783825	0.0527706	0.0598476	0.403632
A52	0.0115662	0.0758982	0.0282716	0.401966
A53	0.0150074	0.0814991	0.0525044	0.403788
A54	0.00879413	0.072812	0.0367163	0.402903
A55	0.015103	0.0593241	0.0653551	0.406912
A56	0.00888972	0.163265	0.0422238	0.403944
A57	0.00592648	0.0408067	0.0503014	0.404986
A58	0.0122353	0.064544	0.0400208	0.403346
A59	0.0133824	0.0683541	0.0484656	0.403892
A60	0.0168236	0.0669063	0.0686596	0.408188
A61	0.0119486	0.0829089	0.0536059	0.412249
A62	0.163265	0.0836328	0.230946	0.411624
A63	0.0381398	0.0579524	0.244898	0.428233
A64	0.0166324	0.0788701	0.100236	0.405975
A65	0.0126177	0.0815372	0	0.402461
A66	0.011853	0.0717833	0.0411223	0.403814
A67	0.0107059	0.0662966	0.0411223	0.404022
A68	0.00707354	0.0147072	0.0510357	0.404205
A69	0.00707354	0.0677064	0.0436924	0.404725
A70	0.0131912	0.0733454	0.0793073	0.404699
A71	0.00879413	0.0557425	0.0983998	0.404309
A72	0.00697795	0.0586763	0.0367163	0.405064
A73	0.014625	0.0709831	0.175871	0.409203
A74	0.00583089	0.0288809	0.042591	0.405246
A75	0.0337427	0.0725834	0.0554417	0.406391
A76	0.013478	0.0611529	0.05177	0.406678
A77	0.0289633	0.0666015	0.0811431	0.408734
A78	0.0285809	0.083709	0.106845	0.407172
A79	0.00783825	0.0118877	0.0642536	0.403866
A80	0.00688237	0.0612672	0.0069761	0.403372
A81	0.0136691	0.0660299	0.0414895	0.402617
A82	0.00736031	0.105998	0.0392865	0.407042
A83	0.00707354	0.0586382	0.0293731	0.398347
A84	0.00860296	0.080318	0.0587461	0.404803
A85	0.0090809	0.070183	0.0458954	0.403814
A86	0.0269559	0.0598956	0.105376	0.408734
A87	0.0254265	0.061191	0.0547073	0.401185
A88	0.00592648	0.0704116	0.0396536	0.403268
A89	0.00621325	0.0597813	0.0378178	0.404153
A90	0.00621325	0.0597813	0.0378178	0.404127
A91	0.00621325	0.0597813	0.0378178	0.404101
A92	0.00984561	0.0598194	0.0477312	0.404673
A93	0.00898531	0.0967016	0.0473641	0.404231
A94	0.0108015	0.0588668	0.0407551	0.404205
A95	0.00850737	0.0718595	0.0455283	0.405819
A96	0.013478	0.0705259	0.0444268	0.4003
A97	0.00946325	0.155264	0.0374507	0.404283
A98	0.00975002	0.0346724	0.0745342	0.403294
A99	0.0331692	0.0571142	0.0752685	0.364323
A100	0.010228	0.067554	0.042591	0.40397
A101	0.00879413	0.0563902	0.0469969	0.403528
A102	0.0122353	0.0950252	0.0326775	0.402825
A103	0.0172059	0.0699544	0.0624178	0.405142
A104	0.0130956	0.0624103	0.078573	0.406574
A105	0.00449266	0.0526182	0.0315761	0.402669
A106	0.00888972	0.161931	0.0216626	0.402565
A107	0.00669119	0.072812	0.0271701	0.403137
A108	0.00975002	0.0690018	0.0407551	0.404387
A109	0.00774266	0.0353201	0.0499342	0.403606
A110	0.00898531	0.0567332	0.0429581	0.404309
A111	0.0129044	0.0638581	0.0469969	0.403554
A112	0.0418677	0.0644678	0.0914237	0.428571
A113	0.0367059	0.0491891	0.0447939	0.407927
A114	0.00946325	0.0296049	0.0407551	0.404335
A115	0.00888972	0.073955	0.0491999	0.40345
A116	0.0127133	0.0634009	0.0411223	0.403372
A117	0.00258089	0.109732	0.015788	0.400534
A118	0.0114706	0.0749076	0.0547073	0.404335
A119	0.00678678	0.0602004	0.035982	0.403814
A120	0.00477942	0.0629818	0.0345134	0.402825
A121	0.0128088	0.0634771	0.0881192	0.404543
A122	0.00554413	0.0432833	0.0451611	0.40496
A123	0.0101324	0.0588668	0.0418566	0.400092
A124	0.00726472	0.0640105	0.0469969	0.404231
A125	0.0142427	0.115829	0.0286387	0.401341
A126	0.0117574	0.0670206	0.0870177	0.404882
A127	0.0111838	0.0624484	0.0954625	0.40699
A128	0.00563972	0.0569999	0.035982	0.402851
A129	0.0119486	0.0753267	0.0304746	0.403059
A130	0.0124265	0.067935	0.0664566	0.403788
A131	0.00860296	0.0715928	0.0466298	0.404335
A132	0.00296324	0.127792	0.0110149	0.400977
A133	0.00975002	0.0522753	0.0587461	0.403658
A134	0.00755148	0.0814229	0.0389193	0.403788
A135	0.00927208	0.0651155	0.0451611	0.403528
A136	0.00621325	0.0526182	0.0433253	0.404882
A137	0.00946325	0.0794036	0.0209283	0.402539
A138	0.00888972	0.0693829	0.0737998	0.404491
A139	0.0123309	0.0786415	0.0591133	0.403814
A140	0.00697795	0.0363869	0.0491999	0.40345
max=ti	0.163265	0.163265	0.244898	0.428571									0.428571
min=tai	0	0	0	0									0
d+	C1	C2	C3	C4									S+	Ki+
A1	0.375328	0.364332	0.341186	0.0179363									1.09878	0.65007
A2	0.421593	0.362503	0.385613	0.0252228									1.19493	0.597762
A3	0.420542	0.343986	0.386347	0.0231428									1.17402	0.608411
A4	0.423027	0.411502	0.372028	0.0234291									1.22999	0.580726
A5	0.419586	0.361817	0.38855	0.0251993									1.19515	0.597652
A6	0.420255	0.352711	0.390753	0.0250692									1.18879	0.600851
A7	0.405343	0.366656	0.352201	0.0211904									1.14539	0.623617
A8	0.418343	0.347415	0.389285	0.0253555									1.1804	0.605122
A9	0.419012	0.343338	0.396995	0.0260844									1.18543	0.602554
A10	0.423792	0.428571	0.363216	0.0182487									1.23383	0.578918
A11	0.420924	0.361436	0.39112	0.024887									1.19837	0.596048
A12	0.419586	0.35153	0.386714	0.0234291									1.18126	0.604681
A13	0.420828	0.373857	0.376801	0.0242361									1.19572	0.597367
A14	0.416145	0.369933	0.370559	0.0209561									1.17759	0.606564
A15	0.422645	0.333203	0.393323	0.0254076									1.17458	0.60812
A16	0.416431	0.361893	0.377902	0.0248089									1.18104	0.604795
A17	0.419395	0.325392	0.380473	0.0230126									1.14827	0.622052
A18	0.419299	0.366504	0.385613	0.0246266									1.19604	0.597207
A19	0.417674	0.360293	0.38855	0.0254857									1.192	0.599231
A20	0.389093	0.3718	0.333843	0.0255898									1.12033	0.637569
A21	0.411747	0.340252	0.377902	0.0229866									1.15289	0.619561
A22	0.415189	0.365894	0.383777	0.0235333									1.18839	0.601051
A23	0.419395	0.316133	0.38855	0.0241841									1.14826	0.622057
A24	0.421211	0.347415	0.384511	0.0238977									1.17703	0.606851
A25	0.42427	0.398433	0.387082	0.0157236									1.22551	0.582848
A26	0.41949	0.385021	0.377168	0.0245225									1.2062	0.592177
A27	0.421975	0.376562	0.387082	0.0238717									1.20949	0.590567
A28	0.422358	0.365818	0.385613	0.0223878									1.19618	0.59714
A29	0.406108	0.376867	0.353302	0.0221796									1.15846	0.616583
A30	0.421593	0.383344	0.380473	0.0239238									1.20933	0.590643
A31	0.409644	0.372333	0.227733	0.0191078									1.02882	0.694277
A32	0.422071	0.381401	0.39112	0.428571									1.62316	0.440057
A33	0.418821	0.33728	0.388183	0.0244444									1.16873	0.611164
A34	0.420159	0.365399	0.384879	0.0252514									1.19569	0.597384
A35	0.418152	0.357969	0.360279	0.0214767									1.15788	0.616892
A36	0.41452	0.373705	0.38598	0.0250431									1.19925	0.595611
A37	0.42102	0.372181	0.386347	0.0237936									1.20334	0.593585
A38	0.420159	0.383992	0.384144	0.0250431									1.21334	0.588694
A39	0.428571	0.383306	0.405073	0.0270737									1.24402	0.574173
A40	0.417674	0.368637	0.382308	0.0247047									1.19332	0.598567
A41	0.416336	0.363494	0.361013	0.0219713									1.16281	0.614273
A42	0.419586	0.411197	0.288315	0.0228044									1.1419	0.625523
A43	0.420733	0.340099	0.397729	0.024913									1.18347	0.603549
A44	0.419681	0.350996	0.381941	0.0245746									1.17719	0.606769
A45	0.419777	0.36075	0.387449	0.0251473									1.19312	0.598668
A46	0.420159	0.373286	0.392956	0.0250952									1.2115	0.589589
A47	0.421306	0.403348	0.379371	0.0254076									1.22943	0.580987
A48	0.402762	0.376448	0.363216	0.0237936									1.16622	0.612479
A49	0.414615	0.344557	0.211577	0.0234031									0.994153	0.718486
A50	0.417196	0.333736	0.356974	0.0239758									1.13188	0.631059
A51	0.420733	0.3758	0.368723	0.024939									1.1902	0.600141
A52	0.417005	0.352673	0.400299	0.0266051									1.19658	0.596938
A53	0.413564	0.347072	0.376067	0.0247828									1.16148	0.614976
A54	0.419777	0.355759	0.391855	0.0256679									1.19306	0.598701
A55	0.413468	0.369247	0.363216	0.0216589									1.16759	0.61176
A56	0.419681	0.265306	0.386347	0.0246266									1.09596	0.651743
A57	0.422645	0.387764	0.37827	0.0235853									1.21226	0.589216
A58	0.416336	0.364027	0.38855	0.0252254									1.19414	0.598159
A59	0.415189	0.360217	0.380105	0.0246787									1.18019	0.605229
A60	0.411747	0.361665	0.359911	0.0203834									1.15371	0.619122
A61	0.416622	0.345662	0.374965	0.0163223									1.15357	0.619194
A62	0.265306	0.344938	0.197625	0.0169471									0.824816	0.865993
A63	0.390431	0.370619	0.183673	0.000338421									0.945061	0.755808
A64	0.411939	0.349701	0.328335	0.0225961									1.11257	0.642013
A65	0.415953	0.347034	0.428571	0.0261105									1.21767	0.586601
A66	0.416718	0.356788	0.387449	0.0247568									1.18571	0.602411
A67	0.417865	0.362274	0.387449	0.0245485									1.19214	0.599164
A68	0.421497	0.413864	0.377535	0.0243663									1.23726	0.577311
A69	0.421497	0.360865	0.384879	0.0238457									1.19109	0.599692
A70	0.41538	0.355226	0.349264	0.0238717									1.14374	0.624517
A71	0.419777	0.372828	0.330171	0.0242622									1.14704	0.622721
A72	0.421593	0.369895	0.391855	0.0235072									1.20685	0.591859
A73	0.413946	0.357588	0.2527	0.0193681									1.0436	0.684442
A74	0.42274	0.39969	0.38598	0.023325									1.23174	0.579901
A75	0.394828	0.355988	0.373129	0.0221796									1.14612	0.623217
A76	0.415093	0.367418	0.376801	0.0218932									1.18121	0.604709
A77	0.399608	0.36197	0.347428	0.0198367									1.12884	0.632759
A78	0.39999	0.344862	0.321726	0.0213986									1.08798	0.656526
A79	0.420733	0.416683	0.364317	0.0247047									1.22644	0.582406
A80	0.421689	0.367304	0.421595	0.0251993									1.23579	0.578
A81	0.414902	0.362541	0.387082	0.0259543									1.19048	0.599998
A82	0.421211	0.322573	0.389285	0.0215288									1.1546	0.618645
A83	0.421497	0.369933	0.399198	0.0302236									1.22085	0.585071
A84	0.419968	0.348253	0.369825	0.0237676									1.16181	0.614802
A85	0.41949	0.358388	0.382676	0.0247568									1.18531	0.602614
A86	0.401615	0.368675	0.323195	0.0198367									1.11332	0.64158
A87	0.403144	0.36738	0.373864	0.0273861									1.17177	0.609576
A88	0.422645	0.358159	0.388917	0.0253035									1.19502	0.597716
A89	0.422358	0.36879	0.390753	0.0244184									1.20632	0.592119
A90	0.422358	0.36879	0.390753	0.0244444									1.20635	0.592107
A91	0.422358	0.36879	0.390753	0.0244704									1.20637	0.592094
A92	0.418725	0.368752	0.38084	0.0238977									1.19221	0.599125
A93	0.419586	0.331869	0.381207	0.0243403									1.157	0.617358
A94	0.41777	0.369704	0.387816	0.0243663									1.19966	0.595408
A95	0.420064	0.356712	0.383043	0.0227523									1.18257	0.604011
A96	0.415093	0.358045	0.384144	0.0282712									1.18555	0.602491
A97	0.419108	0.273307	0.39112	0.0242882									1.10782	0.644764
A98	0.418821	0.393899	0.354037	0.0252774									1.19203	0.599215
A99	0.395402	0.371457	0.353302	0.0642479									1.18441	0.603073
A100	0.418343	0.361017	0.38598	0.0246006									1.18994	0.600269
A101	0.419777	0.372181	0.381574	0.0250431									1.19857	0.595945
A102	0.416336	0.333546	0.395893	0.025746									1.17152	0.609707
A103	0.411365	0.358617	0.366153	0.0234291									1.15956	0.615994
A104	0.415475	0.366161	0.349998	0.0219974									1.15363	0.619162
A105	0.424078	0.375953	0.396995	0.0259022									1.22293	0.584078
A106	0.419681	0.26664	0.406908	0.0260063									1.11924	0.63819
A107	0.42188	0.355759	0.401401	0.0254336									1.20447	0.593027
A108	0.418821	0.359569	0.387816	0.0241841									1.19039	0.600043
A109	0.420828	0.393251	0.378637	0.024965									1.21768	0.586594
A110	0.419586	0.371838	0.385613	0.0242622									1.2013	0.594594
A111	0.415667	0.364713	0.381574	0.0250171									1.18697	0.601771
A112	0.386703	0.364103	0.337147	0									1.08795	0.65654
A113	0.391865	0.379382	0.383777	0.0206437									1.17567	0.607557
A114	0.419108	0.398966	0.387816	0.0242361									1.23013	0.58066
A115	0.419681	0.354616	0.379371	0.0251212									1.17879	0.605948
A116	0.415858	0.36517	0.387449	0.0251993									1.19368	0.598391
A117	0.42599	0.318839	0.412783	0.0280369									1.18565	0.602442
A118	0.4171	0.353663	0.373864	0.0242361									1.16886	0.611094
A119	0.421784	0.368371	0.392589	0.0247568									1.2075	0.59154
A120	0.423792	0.365589	0.394058	0.025746									1.20918	0.590716
A121	0.415762	0.365094	0.340452	0.0240279									1.14534	0.623647
A122	0.423027	0.385288	0.38341	0.0236114									1.21534	0.587726
A123	0.418439	0.369704	0.386714	0.0284794									1.20334	0.593587
A124	0.421306	0.36456	0.381574	0.0243403									1.19178	0.599342
A125	0.414328	0.312742	0.399932	0.0272299									1.15423	0.61884
A126	0.416814	0.36155	0.341553	0.0236895									1.14361	0.62459
A127	0.417387	0.366123	0.333109	0.0215808									1.1382	0.627557
A128	0.422931	0.371571	0.392589	0.02572									1.21281	0.58895
A129	0.416622	0.353244	0.398096	0.0255117									1.19347	0.598492
A130	0.416145	0.360636	0.362114	0.0247828									1.16368	0.613817
A131	0.419968	0.356978	0.381941	0.0242361									1.18312	0.603728
A132	0.425608	0.300779	0.417556	0.0275943									1.17154	0.609699
A133	0.418821	0.376296	0.369825	0.024913									1.18985	0.600313
A134	0.42102	0.347148	0.389652	0.0247828									1.1826	0.603994
A135	0.419299	0.363456	0.38341	0.0250431									1.19121	0.599631
A136	0.422358	0.375953	0.385246	0.0236895									1.20725	0.591665
A137	0.419108	0.349167	0.407643	0.0260324									1.20195	0.594272
A138	0.419681	0.359188	0.354771	0.0240799									1.15772	0.616975
A139	0.41624	0.349929	0.369458	0.0247568									1.16038	0.615559
A140	0.421593	0.392184	0.379371	0.0251212									1.21827	0.586311
min	0.265306	0.265306	0.183673	0									0.714285	1		A1	0.632786	9
RADIS	Ranking Alternatives from Average Distance from the Ideal Solution															A2	0.558558	93
d-	C1	C2	C3	C4									S-	Ki-		A3	0.574339	50
A1	0.0532427	0.0642392	0.0873849	0.410635									0.615501	0.615502		A4	0.532513	133
A2	0.00697795	0.066068	0.0429581	0.403348									0.519352	0.519353		A5	0.558392	95
A3	0.00802943	0.0845854	0.0422238	0.405428									0.540267	0.540267		A6	0.563174	74
A4	0.00554413	0.0170695	0.0565432	0.405142									0.484299	0.484299		A7	0.596256	22
A5	0.00898531	0.0667539	0.0400208	0.403372									0.519132	0.519132		A8	0.569504	58
A6	0.00831619	0.0758601	0.0378178	0.403502									0.525496	0.525496		A9	0.565704	68
A7	0.023228	0.061915	0.07637	0.407381									0.568894	0.568894		A10	0.529688	136
A8	0.010228	0.0811562	0.0392865	0.403215									0.533886	0.533887		A11	0.555983	101
A9	0.00955884	0.0852331	0.0315761	0.402487									0.528855	0.528855		A12	0.568853	61
A10	0.00477942	0	0.0653551	0.410322									0.480457	0.480457		A13	0.557964	97
A11	0.00764707	0.0671349	0.0374507	0.403684									0.515917	0.515917		A14	0.571628	55
A12	0.00898531	0.0770413	0.0418566	0.405142									0.533025	0.533026		A15	0.573913	51
A13	0.00774266	0.0547138	0.05177	0.404335									0.518561	0.518562		A16	0.569022	59
A14	0.0124265	0.0586382	0.0580118	0.407615									0.536691	0.536692		A17	0.594032	26
A15	0.00592648	0.0953681	0.0352477	0.403163									0.539706	0.539706		A18	0.557725	98
A16	0.0121397	0.0666777	0.0506686	0.403762									0.533248	0.533249		A19	0.560756	83
A17	0.00917649	0.103179	0.0480984	0.405558									0.566012	0.566013		A20	0.615764	14
A18	0.00927208	0.0620674	0.0429581	0.403944									0.518242	0.518242		A21	0.590479	27
A19	0.0108971	0.0682779	0.0400208	0.403085									0.522281	0.522282		A22	0.563471	73
A20	0.039478	0.0567713	0.0947282	0.402981									0.593959	0.593959		A23	0.59404	25
A21	0.0168236	0.0883193	0.0506686	0.405584									0.561396	0.561396		A24	0.572051	53
A22	0.0133824	0.062677	0.0447939	0.405038									0.525891	0.525892		A25	0.535813	130
A23	0.00917649	0.112438	0.0400208	0.404387									0.566022	0.566022		A26	0.55013	110
A24	0.00736031	0.0811562	0.0440596	0.404673									0.537249	0.53725		A27	0.54768	119
A25	0.00430148	0.0301383	0.0414895	0.412847									0.488777	0.488777		A28	0.557624	99
A26	0.0090809	0.04355	0.0514029	0.404049									0.508082	0.508083		A29	0.586205	36
A27	0.0065956	0.0520086	0.0414895	0.404699									0.504793	0.504793		A30	0.547797	118
A28	0.00621325	0.0627532	0.0429581	0.406183									0.518108	0.518108		A31	0.689872	4
A29	0.0224633	0.0517038	0.0752685	0.406391									0.555827	0.555828		A32	0.265589	140
A30	0.00697795	0.0452265	0.0480984	0.404647									0.50495	0.504951		A33	0.57836	45
A31	0.0189265	0.0562378	0.200838	0.409463									0.685466	0.685467		A34	0.55799	96
A32	0.00650001	0.0471697	0.0374507	0									0.0911204	0.0911204		A35	0.58665	35
A33	0.00975002	0.0912912	0.040388	0.404127									0.545556	0.545556		A36	0.555324	103
A34	0.00841178	0.0631723	0.0436924	0.40332									0.518596	0.518597		A37	0.552264	108
A35	0.0104191	0.0706021	0.0682924	0.407094									0.556408	0.556408		A38	0.54482	123
A36	0.0140515	0.0548662	0.042591	0.403528									0.515036	0.515037		A39	0.522217	139
A37	0.00755148	0.0563902	0.0422238	0.404777									0.510943	0.510943		A40	0.559764	89
A38	0.00841178	0.0445788	0.0444268	0.403528									0.500945	0.500946		A41	0.582872	41
A39	0	0.0452646	0.0234985	0.401497									0.47026	0.470261		A42	0.598953	18
A40	0.0108971	0.0599337	0.0462626	0.403866									0.52096	0.52096		A43	0.56718	65
A41	0.0122353	0.0650774	0.0675581	0.4066									0.55147	0.551471		A44	0.57193	54
A42	0.00898531	0.0173743	0.140256	0.405767									0.572383	0.572383		A45	0.559915	88
A43	0.00783825	0.0884717	0.0308417	0.403658									0.53081	0.53081		A46	0.546189	120
A44	0.00888972	0.0775747	0.0466298	0.403996									0.537091	0.537091		A47	0.53292	132
A45	0.00879413	0.0678207	0.0411223	0.403424									0.521161	0.521161		A48	0.580272	43
A46	0.00841178	0.0552853	0.0356149	0.403476									0.502788	0.502788		A49	0.719309	3
A47	0.00726472	0.0252232	0.0491999	0.403163									0.484851	0.484852		A50	0.606731	16
A48	0.0258089	0.0521229	0.0653551	0.404777									0.548064	0.548065		A51	0.562115	77
A49	0.0139559	0.0840138	0.216994	0.405168									0.720131	0.720132		A52	0.55732	100
A50	0.011375	0.0948347	0.0715969	0.404595									0.582402	0.582402		A53	0.583888	39
A51	0.00783825	0.0527706	0.0598476	0.403632									0.524088	0.524089		A54	0.559963	87
A52	0.0115662	0.0758982	0.0282716	0.401966									0.517702	0.517702		A55	0.579227	44
A53	0.0150074	0.0814991	0.0525044	0.403788									0.552799	0.5528		A56	0.635033	8
A54	0.00879413	0.072812	0.0367163	0.402903									0.521226	0.521226		A57	0.545618	121
A55	0.015103	0.0593241	0.0653551	0.406912									0.546694	0.546695		A58	0.559153	92
A56	0.00888972	0.163265	0.0422238	0.403944									0.618323	0.618324		A59	0.569662	57
A57	0.00592648	0.0408067	0.0503014	0.404986									0.50202	0.502021		A60	0.58985	30
A58	0.0122353	0.064544	0.0400208	0.403346									0.520146	0.520146		A61	0.589953	28
A59	0.0133824	0.0683541	0.0484656	0.403892									0.534094	0.534095		A62	0.877731	1
A60	0.0168236	0.0669063	0.0686596	0.408188									0.560577	0.560578		A63	0.762516	2
A61	0.0119486	0.0829089	0.0536059	0.412249									0.560712	0.560713		A64	0.621863	11
A62	0.163265	0.0836328	0.230946	0.411624									0.889468	0.889468		A65	0.541608	125
A63	0.0381398	0.0579524	0.244898	0.428233									0.769223	0.769224		A66	0.565492	71
A64	0.0166324	0.0788701	0.100236	0.405975									0.601713	0.601714		A67	0.560656	85
A65	0.0126177	0.0815372	0	0.402461									0.496615	0.496616		A68	0.527166	138
A66	0.011853	0.0717833	0.0411223	0.403814									0.528573	0.528573		A69	0.561445	80
A67	0.0107059	0.0662966	0.0411223	0.404022									0.522147	0.522148		A70	0.59753	20
A68	0.00707354	0.0147072	0.0510357	0.404205									0.477021	0.477022		A71	0.594983	24
A69	0.00707354	0.0677064	0.0436924	0.404725									0.523198	0.523198		A72	0.549647	114
A70	0.0131912	0.0733454	0.0793073	0.404699									0.570543	0.570544		A73	0.677563	5
A71	0.00879413	0.0557425	0.0983998	0.404309									0.567245	0.567246		A74	0.531225	135
A72	0.00697795	0.0586763	0.0367163	0.405064									0.507434	0.507435		A75	0.595689	23
A73	0.014625	0.0709831	0.175871	0.409203									0.670682	0.670683		A76	0.568894	60
A74	0.00583089	0.0288809	0.042591	0.405246									0.482549	0.482549		A77	0.609101	15
A75	0.0337427	0.0725834	0.0554417	0.406391									0.568159	0.56816		A78	0.641417	7
A76	0.013478	0.0611529	0.05177	0.406678									0.533079	0.533079		A79	0.535126	131
A77	0.0289633	0.0666015	0.0811431	0.408734									0.585442	0.585443		A80	0.528249	137
A78	0.0285809	0.083709	0.106845	0.407172									0.626307	0.626308		A81	0.561902	79
A79	0.00783825	0.0118877	0.0642536	0.403866									0.487846	0.487846		A82	0.589166	32
A80	0.00688237	0.0612672	0.0069761	0.403372									0.478497	0.478498		A83	0.539252	128
A81	0.0136691	0.0660299	0.0414895	0.402617									0.523805	0.523806		A84	0.583636	40
A82	0.00736031	0.105998	0.0392865	0.407042									0.559687	0.559688		A85	0.565794	67
A83	0.00707354	0.0586382	0.0293731	0.398347									0.493432	0.493433		A86	0.621271	12
A84	0.00860296	0.080318	0.0587461	0.404803									0.552471	0.552471		A87	0.576043	49
A85	0.0090809	0.070183	0.0458954	0.403814									0.528974	0.528974		A88	0.558488	94
A86	0.0269559	0.0598956	0.105376	0.408734									0.600962	0.600962		A89	0.550042	111
A87	0.0254265	0.061191	0.0547073	0.401185									0.54251	0.54251		A90	0.550023	112
A88	0.00592648	0.0704116	0.0396536	0.403268									0.519259	0.51926		A91	0.550004	113
A89	0.00621325	0.0597813	0.0378178	0.404153									0.507965	0.507965		A92	0.560597	86
A90	0.00621325	0.0597813	0.0378178	0.404127									0.507939	0.507939		A93	0.58732	33
A91	0.00621325	0.0597813	0.0378178	0.404101									0.507913	0.507913		A94	0.555018	104
A92	0.00984561	0.0598194	0.0477312	0.404673									0.52207	0.52207		A95	0.567862	62
A93	0.00898531	0.0967016	0.0473641	0.404231									0.557282	0.557282		A96	0.565611	69
A94	0.0108015	0.0588668	0.0407551	0.404205									0.514628	0.514629		A97	0.625613	10
A95	0.00850737	0.0718595	0.0455283	0.405819									0.531714	0.531714		A98	0.560733	84
A96	0.013478	0.0705259	0.0444268	0.4003									0.52873	0.528731		A99	0.566474	66
A97	0.00946325	0.155264	0.0374507	0.404283									0.60646	0.606461		A100	0.562307	76
A98	0.00975002	0.0346724	0.0745342	0.403294									0.52225	0.522251		A101	0.555827	102
A99	0.0331692	0.0571142	0.0752685	0.364323									0.529875	0.529875		A102	0.576235	47
A100	0.010228	0.067554	0.042591	0.40397									0.524343	0.524344		A103	0.585357	37
A101	0.00879413	0.0563902	0.0469969	0.403528									0.515709	0.51571		A104	0.589908	29
A102	0.0122353	0.0950252	0.0326775	0.402825									0.542763	0.542764		A105	0.537717	129
A103	0.0172059	0.0699544	0.0624178	0.405142									0.55472	0.55472		A106	0.61662	13
A104	0.0130956	0.0624103	0.078573	0.406574									0.560653	0.560653		A107	0.551419	109
A105	0.00449266	0.0526182	0.0315761	0.402669									0.491356	0.491356		A108	0.561969	78
A106	0.00888972	0.161931	0.0216626	0.402565									0.595048	0.595049		A109	0.541599	126
A107	0.00669119	0.072812	0.0271701	0.403137									0.509811	0.509811		A110	0.55379	105
A108	0.00975002	0.0690018	0.0407551	0.404387									0.523894	0.523894		A111	0.564543	72
A109	0.00774266	0.0353201	0.0499342	0.403606									0.496603	0.496603		A112	0.641435	6
A110	0.00898531	0.0567332	0.0429581	0.404309									0.512985	0.512986		A113	0.573087	52
A111	0.0129044	0.0638581	0.0469969	0.403554									0.527313	0.527314		A114	0.532409	134
A112	0.0418677	0.0644678	0.0914237	0.428571									0.62633	0.626331		A115	0.570721	56
A113	0.0367059	0.0491891	0.0447939	0.407927									0.538616	0.538617		A116	0.5595	91
A114	0.00946325	0.0296049	0.0407551	0.404335									0.484158	0.484159		A117	0.565539	70
A115	0.00888972	0.073955	0.0491999	0.40345									0.535494	0.535495		A118	0.578257	46
A116	0.0127133	0.0634009	0.0411223	0.403372									0.520608	0.520609		A119	0.549162	116
A117	0.00258089	0.109732	0.015788	0.400534									0.528635	0.528636		A120	0.547908	117
A118	0.0114706	0.0749076	0.0547073	0.404335									0.54542	0.545421		A121	0.596298	21
A119	0.00678678	0.0602004	0.035982	0.403814									0.506783	0.506784		A122	0.543338	124
A120	0.00477942	0.0629818	0.0345134	0.402825									0.5051	0.5051		A123	0.552267	107
A121	0.0128088	0.0634771	0.0881192	0.404543									0.568948	0.568949		A124	0.560923	82
A122	0.00554413	0.0432833	0.0451611	0.40496									0.498948	0.498949		A125	0.589446	31
A123	0.0101324	0.0588668	0.0418566	0.400092									0.510947	0.510948		A126	0.597634	19
A124	0.00726472	0.0640105	0.0469969	0.404231									0.522503	0.522503		A127	0.601821	17
A125	0.0142427	0.115829	0.0286387	0.401341									0.560051	0.560052		A128	0.545211	122
A126	0.0117574	0.0670206	0.0870177	0.404882									0.570677	0.570678		A129	0.559651	90
A127	0.0111838	0.0624484	0.0954625	0.40699									0.576085	0.576085		A130	0.582212	42
A128	0.00563972	0.0569999	0.035982	0.402851									0.501473	0.501473		A131	0.567444	64
A129	0.0119486	0.0753267	0.0304746	0.403059									0.520809	0.52081		A132	0.576224	48
A130	0.0124265	0.067935	0.0664566	0.403788									0.550606	0.550607		A133	0.562371	75
A131	0.00860296	0.0715928	0.0466298	0.404335									0.53116	0.531161		A134	0.567838	63
A132	0.00296324	0.127792	0.0110149	0.400977									0.542747	0.542748		A135	0.561354	81
A133	0.00975002	0.0522753	0.0587461	0.403658									0.524429	0.52443		A136	0.549352	115
A134	0.00755148	0.0814229	0.0389193	0.403788									0.531682	0.531682		A137	0.553303	106
A135	0.00927208	0.0651155	0.0451611	0.403528									0.523077	0.523077		A138	0.58677	34
A136	0.00621325	0.0526182	0.0433253	0.404882									0.507038	0.507039		A139	0.58473	38
A137	0.00946325	0.0794036	0.0209283	0.402539									0.512334	0.512334		A140	0.541163	127
A138	0.00888972	0.0693829	0.0737998	0.404491									0.556563	0.556564
A139	0.0123309	0.0786415	0.0591133	0.403814									0.5539	0.553901
A140	0.00697795	0.0363869	0.0491999	0.40345									0.496015	0.496015
max	0.163265	0.163265	0.244898	0.428571									0.999999

## Sheet: 19_12
xij	C1	C2	C3	C4
A1	1.11	4.89	0.29	0.19
A2	0.85	-11.56	0.72	0.19
A3	0.15	0.27	-0.03	0.19
A4	0.11	-10.69	1.29	1.36
A5	0.8	1.93	0.56	0.21
A6	0.34	3.06	0.42	0.21
A7	0.93	1.53	0.6	0.4
A8	1.86	7.04	0.36	0.13
A9	2.53	8.94	0.55	0.25
A10	0.41	22.59	-0.84	-2.71
A11	0.26	1.98	0.03	0.04
A12	0.14	2.43	0.24	0.38
A13	0.59	7.28	0.31	0.05
A14	0.33	0.78	0.2	0.39
A15	0.02	2.19	0.2	0.07
A16	0.73	2.63	0.06	0.02
A17	0.06	-1.53	0.68	0.45
A18	0.35	0.68	0.23	0.13
A19	0.38	-5.76	0.03	0.01
A20	2.1	7.22	2.73	0.48
A21	2.03	16.85	0.27	0.42
A22	1.81	3.79	0.24	0.4
A23	0.4	7.99	0.67	0.36
A24	0.23	4.4	1.12	0.49
A25	-0.09	-5.48	0.05	1.53
A26	0.37	0.2	0.38	0.15
A27	0.14	0.61	0.1	0.29
A28	-0.08	-18.89	0.26	0.62
A29	0.45	1.36	0.26	0.18
A30	0.18	4.31	-0.32	-0.23
A31	2.08	2.36	4.57	2.22
A32	0.62	4.31	0.35	185.88
A33	0.27	-0.67	0.15	0.13
A34	0.15	-22.72	1.43	0.11
A35	-0.3	-36.23	0.8	0.43
A36	2.29	2.79	0.52	0.29
A37	0.14	-1.8	0.16	0.43
A38	0.2	1.52	0.46	0.1
A39	0.35	-1.26	0.31	0.54
A40	0.57	-0.66	0.37	0.17
A41	0.27	2	0.26	0.23
A42	0.53	11.65	-0.29	0.14
A43	0.67	2.69	1.05	0.29
A44	0.5	6.62	0.26	0.06
A45	0.63	-6.03	1.63	0.36
A46	0.58	3.77	0.36	0.08
A47	1.21	-3.37	2.69	0.61
A48	-0.11	-0.37	0.44	1.52
A49	0.96	75.43	32.43	1.24
A50	0.47	0.65	1.02	0.28
A51	0.48	-2.64	-0.1	0.01
A52	1.2	4.35	0.37	0.14
A53	-0.78	1.31	0.63	0.11
A54	0.35	4.58	0.41	0.09
A55	0.45	3.97	0.11	0.21
A56	0.78	64.44	-0.17	0.04
A57	0.17	6.61	0.09	0.32
A58	0.79	-0.59	2.17	0.69
A59	-0.22	1.3	0.32	0.14
A60	0.33	0.26	0.21	0.34
A61	1.08	-6.47	0.52	2.96
A62	27.21	8.71	6.69	3.3
A63	-2.19	-28.62	-1.71	-4.74
A64	-0.05	8.66	0.78	0.33
A65	0.77	12.92	0.82	-0.06
A66	0.1	3.96	0.1	0.1
A67	0.93	-1.13	0.48	0.32
A68	0.16	-3.86	0.77	0.41
A69	0.13	2.49	0.24	0.17
A70	1.96	21.05	0.09	0.04
A71	0.29	-18.01	2.58	0.31
A72	0.58	10.04	0.04	0.06
A73	0.78	-6.06	-0.15	0.1
A74	0.51	3.79	0.19	0.43
A75	4.46	3.42	1.3	2
A76	6.36	6.93	1.82	3.36
A77	0.54	0.83	0.26	0.25
A78	1.33	3.12	0.51	0.16
A79	0.4	5.8	0.32	0.02
A80	0.48	-0.64	0.88	0.51
A81	1.2	4.16	0.22	-0.04
A82	0.02	-14.44	0.75	0.58
A83	3.42	1.61	3.44	0.64
A84	0.63	3.01	0.63	0.67
A85	0.36	2.21	1.33	0.33
A86	-1.64	-3.32	0.06	-0.11
A87	1.28	0.68	0.78	0.13
A88	0.11	2.62	-0.04	0.09
A89	0.1	-2.96	0.19	0.32
A90	0.1	-2.96	0.19	0.32
A91	0.09	-2.96	0.17	0.3
A92	0.83	0.36	0.23	0.25
A93	-0.05	-9.76	0.81	0.57
A94	0.47	4.71	0.1	0.14
A95	0.34	1.05	0.27	0.53
A96	-0.16	-2.37	-0.28	-0.56
A97	0.24	-14.46	0.92	0.19
A98	1.48	10.5	1.33	0.24
A99	-5.75	6.59	-6.82	-23.7
A100	1.18	3.45	0.53	0.49
A101	0.23	-12.92	0.95	0.18
A102	0.36	4.82	0.5	0.23
A103	2.39	5.41	0.82	0.51
A104	0.86	0.78	1.49	0.75
A105	0.22	-4.08	-0.02	0.16
A106	-0.07	7.39	-2.33	-0.83
A107	0.14	1.75	0.07	0.05
A108	0.51	1.2	0.07	0.11
A109	0.14	-20.27	0.49	0.06
A110	0.4	1.48	0.11	0.09
A111	0.5	2.72	0.38	0.1
A112	0.76	2.03	-0.25	-6.05
A113	-1.8	-1.52	0.32	2.04
A114	0.09	-124.25	2.39	0.24
A115	0.73	13.06	1.8	0.38
A116	0.64	0.57	0.42	0.04
A117	0	2.47	0.35	0.09
A118	1.08	-12.14	1.83	0.39
A119	0.43	-0.55	0.51	0.35
A120	0.26	10.97	-0.26	-0.34
A121	0.58	-7.28	0.91	0.03
A122	0.04	-13.87	0.75	0.41
A123	0.99	9.88	0.43	0.26
A124	0.78	3.57	0.22	0.08
A125	1.19	8.33	0.59	0.17
A126	0.98	0.15	2.02	0.47
A127	0.54	10	0.67	0.3
A128	0.08	-0.12	-0.1	-0.4
A129	0.64	8.37	0.56	0.09
A130	0.72	8.41	0.57	0.01
A131	0.14	-3.38	0.38	0.4
A132	2.66	3.41	6	1.96
A133	0.27	1.53	-0.35	-0.06
A134	0.13	3.12	0.1	0.42
A135	0.47	1.38	0.27	0.04
A136	0.23	1.41	0.13	0.06
A137	0.63	5.09	0.57	0.1
A138	0.28	4.61	0.18	0.04
A139	0.41	4.15	0.26	-0.04
A140	1.06	4.59	1.59	0.26
MAX	27.21	75.43	32.43	185.88
MIN	-5.75	-124.25	-6.82	-23.7
	1	1	1	1
	Normalizacija
nij	C1	C2	C3	C4
A1	0.208131	0.646735	0.181146	0.11399
A2	0.200243	0.564353	0.192102	0.11399
A3	0.179005	0.623598	0.172994	0.11399
A4	0.177791	0.56871	0.206624	0.119572
A5	0.198726	0.631911	0.188025	0.114085
A6	0.184769	0.63757	0.184459	0.114085
A7	0.20267	0.629908	0.189045	0.114992
A8	0.230886	0.657502	0.18293	0.113704
A9	0.251214	0.667017	0.187771	0.114276
A10	0.186893	0.735377	0.152357	0.100153
A11	0.182342	0.632161	0.174522	0.113274
A12	0.178701	0.634415	0.179873	0.114896
A13	0.192354	0.658704	0.181656	0.113322
A14	0.184466	0.626152	0.178854	0.114944
A15	0.175061	0.633213	0.178854	0.113417
A16	0.196602	0.635417	0.175287	0.113179
A17	0.176274	0.614583	0.191083	0.11523
A18	0.185073	0.625651	0.179618	0.113704
A19	0.185983	0.593399	0.174522	0.113131
A20	0.238167	0.658403	0.243312	0.115374
A21	0.236044	0.706631	0.180637	0.115087
A22	0.229369	0.641226	0.179873	0.114992
A23	0.18659	0.66226	0.190828	0.114801
A24	0.181432	0.644281	0.202293	0.115421
A25	0.171723	0.594802	0.175032	0.120384
A26	0.18568	0.623247	0.183439	0.113799
A27	0.178701	0.6253	0.176306	0.114467
A28	0.172027	0.527644	0.180382	0.116042
A29	0.188107	0.629056	0.180382	0.113942
A30	0.179915	0.64383	0.165605	0.111986
A31	0.237561	0.634065	0.290191	0.123676
A32	0.193265	0.64383	0.182675	1
A33	0.182646	0.61889	0.17758	0.113704
A34	0.179005	0.508464	0.210191	0.113608
A35	0.165352	0.440805	0.19414	0.115135
A36	0.243932	0.636218	0.187006	0.114467
A37	0.178701	0.613231	0.177834	0.115135
A38	0.180522	0.629858	0.185478	0.11356
A39	0.185073	0.615935	0.181656	0.11566
A40	0.191748	0.61894	0.183185	0.113894
A41	0.182646	0.632262	0.180382	0.114181
A42	0.190534	0.680589	0.166369	0.113751
A43	0.194782	0.635717	0.20051	0.114467
A44	0.189624	0.655399	0.180382	0.11337
A45	0.193568	0.592047	0.215287	0.114801
A46	0.192051	0.641126	0.18293	0.113465
A47	0.211165	0.605369	0.242293	0.115994
A48	0.171117	0.620393	0.184968	0.120336
A49	0.20358	1	1	0.119
A50	0.188714	0.625501	0.199745	0.114419
A51	0.189017	0.609024	0.17121	0.113131
A52	0.210862	0.64403	0.183185	0.113751
A53	0.150789	0.628806	0.189809	0.113608
A54	0.185073	0.645182	0.184204	0.113513
A55	0.188107	0.642127	0.176561	0.114085
A56	0.198119	0.944962	0.169427	0.113274
A57	0.179612	0.655349	0.176051	0.11461
A58	0.198422	0.619291	0.229045	0.116376
A59	0.167779	0.628756	0.181911	0.113751
A60	0.184466	0.623548	0.179108	0.114706
A61	0.207221	0.589844	0.187006	0.127207
A62	1	0.665865	0.344204	0.128829
A63	0.10801	0.478916	0.130191	0.0904666
A64	0.172937	0.665615	0.193631	0.114658
A65	0.197816	0.686949	0.19465	0.112797
A66	0.177488	0.642077	0.176306	0.11356
A67	0.20267	0.616587	0.185987	0.11461
A68	0.179308	0.602915	0.193376	0.11504
A69	0.178398	0.634716	0.179873	0.113894
A70	0.23392	0.727664	0.176051	0.113274
A71	0.183252	0.532051	0.23949	0.114562
A72	0.192051	0.672526	0.174777	0.11337
A73	0.198119	0.591897	0.169936	0.11356
A74	0.189927	0.641226	0.178599	0.115135
A75	0.309769	0.639373	0.206879	0.122626
A76	0.367415	0.656951	0.220127	0.129115
A77	0.190837	0.626402	0.180382	0.114276
A78	0.214806	0.637871	0.186752	0.113847
A79	0.18659	0.651292	0.181911	0.113179
A80	0.189017	0.61904	0.196178	0.115517
A81	0.210862	0.643079	0.179363	0.112892
A82	0.175061	0.54993	0.192866	0.115851
A83	0.278216	0.630308	0.261401	0.116137
A84	0.193568	0.63732	0.189809	0.11628
A85	0.185376	0.633313	0.207643	0.114658
A86	0.124697	0.605619	0.175287	0.112558
A87	0.213289	0.625651	0.193631	0.113704
A88	0.177791	0.635367	0.172739	0.113513
A89	0.177488	0.607422	0.178599	0.11461
A90	0.177488	0.607422	0.178599	0.11461
A91	0.177184	0.607422	0.178089	0.114515
A92	0.199636	0.624048	0.179618	0.114276
A93	0.172937	0.573367	0.194395	0.115803
A94	0.188714	0.645833	0.176306	0.113751
A95	0.184769	0.627504	0.180637	0.115612
A96	0.1696	0.610377	0.166624	0.110411
A97	0.181735	0.54983	0.197197	0.11399
A98	0.219357	0.67483	0.207643	0.114228
A99	0	0.655248	0	0
A100	0.210255	0.639523	0.187261	0.115421
A101	0.181432	0.557542	0.197962	0.113942
A102	0.185376	0.646384	0.186497	0.114181
A103	0.246966	0.649339	0.19465	0.115517
A104	0.200546	0.626152	0.21172	0.116662
A105	0.181129	0.601813	0.173248	0.113847
A106	0.17233	0.659255	0.114395	0.109123
A107	0.178701	0.63101	0.175541	0.113322
A108	0.189927	0.628255	0.175541	0.113608
A109	0.178701	0.520733	0.186242	0.11337
A110	0.18659	0.629657	0.176561	0.113513
A111	0.189624	0.635867	0.183439	0.11356
A112	0.197512	0.632412	0.167389	0.0842161
A113	0.119842	0.614633	0.181911	0.122817
A114	0.177184	0	0.23465	0.114228
A115	0.196602	0.68765	0.219618	0.114896
A116	0.193871	0.6251	0.184459	0.113274
A117	0.174454	0.634615	0.182675	0.113513
A118	0.207221	0.561448	0.220382	0.114944
A119	0.1875	0.619491	0.186752	0.114753
A120	0.182342	0.677183	0.167134	0.111461
A121	0.192051	0.585787	0.196943	0.113226
A122	0.175667	0.552784	0.192866	0.11504
A123	0.20449	0.671725	0.184713	0.114324
A124	0.198119	0.640124	0.179363	0.113465
A125	0.210558	0.663962	0.18879	0.113894
A126	0.204187	0.622997	0.225223	0.115326
A127	0.190837	0.672326	0.190828	0.114515
A128	0.176881	0.621645	0.17121	0.111175
A129	0.193871	0.664163	0.188025	0.113513
A130	0.196299	0.664363	0.18828	0.113131
A131	0.178701	0.605319	0.183439	0.114992
A132	0.255158	0.639323	0.326624	0.122435
A133	0.182646	0.629908	0.164841	0.112797
A134	0.178398	0.637871	0.176306	0.115087
A135	0.188714	0.629157	0.180637	0.113274
A136	0.181432	0.629307	0.17707	0.11337
A137	0.193568	0.647736	0.18828	0.11356
A138	0.182949	0.645333	0.178344	0.113274
A139	0.186893	0.643029	0.180382	0.112892
A140	0.206614	0.645232	0.214268	0.114324
	0.163265	0.163265	0.244898	0.428571
vij	C1	C2	C3	C4
A1	0.0339805	0.105589	0.0443624	0.0488528
A2	0.0326926	0.0921391	0.0470454	0.0488528
A3	0.0292252	0.101812	0.0423658	0.0488528
A4	0.0290271	0.0928504	0.0506019	0.0512453
A5	0.032445	0.103169	0.0460471	0.0488937
A6	0.0301664	0.104093	0.0451735	0.0488937
A7	0.0330889	0.102842	0.0462966	0.0492822
A8	0.0376956	0.107347	0.0447992	0.0487301
A9	0.0410144	0.108901	0.0459847	0.0489755
A10	0.0305131	0.120061	0.0373118	0.0429225
A11	0.0297701	0.10321	0.0427402	0.048546
A12	0.0291757	0.103578	0.0440504	0.0492413
A13	0.0314047	0.107543	0.0444872	0.0485665
A14	0.0301168	0.102229	0.0438009	0.0492617
A15	0.0285813	0.103382	0.0438009	0.0486074
A16	0.0320982	0.103741	0.0429273	0.0485051
A17	0.0287794	0.10034	0.0467958	0.0493844
A18	0.0302159	0.102147	0.043988	0.0487301
A19	0.0303645	0.0968814	0.0427402	0.0484847
A20	0.0388844	0.107494	0.0595866	0.0494458
A21	0.0385377	0.115368	0.0442376	0.0493231
A22	0.0374479	0.10469	0.0440504	0.0492822
A23	0.0304636	0.108124	0.0467334	0.0492004
A24	0.0296215	0.105189	0.0495411	0.0494662
A25	0.0280364	0.0971103	0.0428649	0.0515929
A26	0.030315	0.101754	0.044924	0.048771
A27	0.0291757	0.10209	0.0431769	0.0490572
A28	0.0280859	0.0861458	0.0441752	0.0497321
A29	0.0307113	0.102703	0.0441752	0.0488323
A30	0.0293738	0.105115	0.0405564	0.0479939
A31	0.0387853	0.103521	0.0710672	0.0530039
A32	0.0315533	0.105115	0.0447368	0.428571
A33	0.0298196	0.101043	0.0434889	0.0487301
A34	0.0292252	0.0830143	0.0514754	0.0486892
A35	0.0269962	0.0719681	0.0475445	0.0493435
A36	0.0398256	0.103872	0.0457975	0.0490572
A37	0.0291757	0.100119	0.0435513	0.0493435
A38	0.0294729	0.102834	0.0454231	0.0486687
A39	0.0302159	0.100561	0.0444872	0.0495685
A40	0.0313057	0.101051	0.0448616	0.0488119
A41	0.0298196	0.103226	0.0441752	0.0489346
A42	0.0311075	0.111116	0.0407435	0.0487505
A43	0.031801	0.10379	0.0491044	0.0490572
A44	0.0309589	0.107004	0.0441752	0.0485869
A45	0.0316029	0.0966606	0.0527233	0.0492004
A46	0.0313552	0.104673	0.0447992	0.0486278
A47	0.0344759	0.0988355	0.0593371	0.0497116
A48	0.0279373	0.101288	0.0452983	0.0515725
A49	0.0332375	0.163265	0.244898	0.0509999
A50	0.0308103	0.102122	0.0489172	0.0490368
A51	0.0308599	0.0994324	0.041929	0.0484847
A52	0.0344263	0.105148	0.0448616	0.0487505
A53	0.0246185	0.102662	0.0464838	0.0486892
A54	0.0302159	0.105336	0.0451111	0.0486483
A55	0.0307113	0.104837	0.0432393	0.0488937
A56	0.0323459	0.154279	0.0414923	0.048546
A57	0.0293243	0.106995	0.0431145	0.0491186
A58	0.0323954	0.101109	0.0560926	0.0498752
A59	0.0273925	0.102654	0.0445496	0.0487505
A60	0.0301168	0.101804	0.0438633	0.0491595
A61	0.0338319	0.0963008	0.0457975	0.0545171
A62	0.163265	0.108713	0.0842948	0.0552124
A63	0.0176342	0.0781903	0.0318835	0.0387714
A64	0.0282345	0.108672	0.0474197	0.049139
A65	0.0322964	0.112155	0.0476693	0.0483415
A66	0.0289776	0.104829	0.0431769	0.0486687
A67	0.0330889	0.100667	0.0455479	0.0491186
A68	0.0292748	0.0984349	0.0473573	0.0493026
A69	0.0291262	0.103627	0.0440504	0.0488119
A70	0.0381909	0.118802	0.0431145	0.048546
A71	0.0299187	0.0868654	0.0586507	0.0490981
A72	0.0313552	0.1098	0.0428026	0.0485869
A73	0.0323459	0.0966361	0.0416171	0.0486687
A74	0.0310085	0.10469	0.0437385	0.0493435
A75	0.0505745	0.104387	0.0506642	0.052554
A76	0.059986	0.107257	0.0539088	0.0553351
A77	0.0311571	0.10227	0.0441752	0.0489755
A78	0.0350703	0.104142	0.0457351	0.0487914
A79	0.0304636	0.106333	0.0445496	0.0485051
A80	0.0308599	0.101068	0.0480437	0.0495071
A81	0.0344263	0.104992	0.0439257	0.0483824
A82	0.0285813	0.0897843	0.0472326	0.0496503
A83	0.0454229	0.102907	0.0640166	0.049773
A84	0.0316029	0.104052	0.0464838	0.0498343
A85	0.0302654	0.103398	0.0508514	0.049139
A86	0.0203586	0.0988764	0.0429273	0.0482393
A87	0.0348226	0.102147	0.0474197	0.0487301
A88	0.0290271	0.103733	0.0423034	0.0486483
A89	0.0289776	0.0991707	0.0437385	0.0491186
A90	0.0289776	0.0991707	0.0437385	0.0491186
A91	0.028928	0.0991707	0.0436137	0.0490777
A92	0.0325936	0.101885	0.043988	0.0489755
A93	0.0282345	0.0936108	0.0476069	0.0496298
A94	0.0308103	0.105442	0.0431769	0.0487505
A95	0.0301664	0.102449	0.0442376	0.049548
A96	0.0276897	0.0996531	0.0408059	0.0473191
A97	0.029671	0.089768	0.0482933	0.0488528
A98	0.0358133	0.110176	0.0508514	0.048955
A99	0	0.106979	0	0
A100	0.0343273	0.104412	0.0458599	0.0494662
A101	0.0296215	0.0910271	0.0484804	0.0488323
A102	0.0302654	0.105532	0.0456727	0.0489346
A103	0.0403209	0.106014	0.0476693	0.0495071
A104	0.0327422	0.102229	0.0518497	0.0499979
A105	0.029572	0.098255	0.0424282	0.0487914
A106	0.0281355	0.107633	0.0280151	0.046767
A107	0.0291757	0.103022	0.0429897	0.0485665
A108	0.0310085	0.102572	0.0429897	0.0486892
A109	0.0291757	0.0850175	0.0456103	0.0485869
A110	0.0304636	0.102801	0.0432393	0.0486483
A111	0.0309589	0.103815	0.044924	0.0486687
A112	0.0322468	0.103251	0.0409931	0.0360926
A113	0.019566	0.100348	0.0445496	0.0526358
A114	0.028928	0	0.0574652	0.048955
A115	0.0320982	0.112269	0.053784	0.0492413
A116	0.0316524	0.102057	0.0451735	0.048546
A117	0.0284822	0.10361	0.0447368	0.0486483
A118	0.0338319	0.0916649	0.0539712	0.0492617
A119	0.0306122	0.101141	0.0457351	0.0491799
A120	0.0297701	0.11056	0.0409307	0.047769
A121	0.0313552	0.0956386	0.0482309	0.0485256
A122	0.0286804	0.0902504	0.0472326	0.0493026
A123	0.0333861	0.109669	0.0452359	0.0489959
A124	0.0323459	0.10451	0.0439257	0.0486278
A125	0.0343768	0.108402	0.0462342	0.0488119
A126	0.0333366	0.101714	0.0551566	0.0494253
A127	0.0311571	0.109767	0.0467334	0.0490777
A128	0.0288785	0.101493	0.041929	0.0476463
A129	0.0316524	0.108435	0.0460471	0.0486483
A130	0.0320487	0.108467	0.0461095	0.0484847
A131	0.0291757	0.0988273	0.044924	0.0492822
A132	0.0416583	0.104379	0.0799896	0.0524722
A133	0.0298196	0.102842	0.0403692	0.0483415
A134	0.0291262	0.104142	0.0431769	0.0493231
A135	0.0308103	0.102719	0.0442376	0.048546
A136	0.0296215	0.102744	0.0433641	0.0485869
A137	0.0316029	0.105753	0.0461095	0.0486687
A138	0.0298692	0.10536	0.0436761	0.048546
A139	0.0305131	0.104984	0.0441752	0.0483824
A140	0.0337328	0.105344	0.0524737	0.0489959
max=ti	0.163265	0.163265	0.244898	0.428571									0.428571
min=tai	0	0	0	0									0
d+	C1	C2	C3	C4									S+	Ki+
A1	0.39459	0.322982	0.384209	0.379718									1.4815	0.482137
A2	0.395878	0.336432	0.381526	0.379718									1.49355	0.478245
A3	0.399346	0.326759	0.386205	0.379718									1.49203	0.478734
A4	0.399544	0.335721	0.377969	0.377326									1.49056	0.479206
A5	0.396126	0.325402	0.382524	0.379677									1.48373	0.481412
A6	0.398405	0.324478	0.383397	0.379677									1.48596	0.48069
A7	0.395482	0.325729	0.382274	0.379289									1.48277	0.481722
A8	0.390875	0.321224	0.383772	0.379841									1.47571	0.484027
A9	0.387557	0.31967	0.382586	0.379596									1.46941	0.486104
A10	0.398058	0.30851	0.391259	0.385648									1.48348	0.481494
A11	0.398801	0.325361	0.385831	0.380025									1.49002	0.47938
A12	0.399395	0.324993	0.384521	0.37933									1.48824	0.479953
A13	0.397166	0.321028	0.384084	0.380005									1.48228	0.481882
A14	0.398454	0.326342	0.38477	0.379309									1.48888	0.479748
A15	0.39999	0.325189	0.38477	0.379964									1.48991	0.479414
A16	0.396473	0.32483	0.385644	0.380066									1.48701	0.480349
A17	0.399792	0.328231	0.381775	0.379187									1.48898	0.479713
A18	0.398355	0.326424	0.384583	0.379841									1.4892	0.479642
A19	0.398206	0.33169	0.385831	0.380086									1.49581	0.477523
A20	0.389687	0.321077	0.368984	0.379125									1.45887	0.489614
A21	0.390033	0.313203	0.384333	0.379248									1.46682	0.486962
A22	0.391123	0.323881	0.384521	0.379289									1.47881	0.483012
A23	0.398107	0.320447	0.381838	0.379371									1.47976	0.482702
A24	0.398949	0.323382	0.37903	0.379105									1.48047	0.482473
A25	0.400535	0.331461	0.385706	0.376978									1.49468	0.477885
A26	0.398256	0.326817	0.383647	0.3798									1.48852	0.479863
A27	0.399395	0.326481	0.385394	0.379514									1.49078	0.479134
A28	0.400485	0.342425	0.384396	0.378839									1.50614	0.474247
A29	0.39786	0.325868	0.384396	0.379739									1.48786	0.480075
A30	0.399197	0.323456	0.388015	0.380577									1.49124	0.478986
A31	0.389786	0.32505	0.357504	0.375567									1.44791	0.493322
A32	0.397018	0.323456	0.383834	0									1.10431	0.646817
A33	0.398751	0.327528	0.385082	0.379841									1.4912	0.478999
A34	0.399346	0.345557	0.377096	0.379882									1.50188	0.475594
A35	0.401575	0.356603	0.381026	0.379227									1.51843	0.47041
A36	0.388745	0.324699	0.382774	0.379514									1.47573	0.484021
A37	0.399395	0.328452	0.38502	0.379227									1.49209	0.478713
A38	0.399098	0.325737	0.383148	0.379902									1.48789	0.480067
A39	0.398355	0.32801	0.384084	0.379003									1.48945	0.479562
A40	0.397265	0.32752	0.383709	0.379759									1.48825	0.479948
A41	0.398751	0.325345	0.384396	0.379636									1.48813	0.479989
A42	0.397463	0.317455	0.387827	0.37982									1.48257	0.48179
A43	0.39677	0.324781	0.379467	0.379514									1.48053	0.482452
A44	0.397612	0.321567	0.384396	0.379984									1.48356	0.481467
A45	0.396968	0.33191	0.375848	0.379371									1.4841	0.481293
A46	0.397216	0.323898	0.383772	0.379943									1.48483	0.481056
A47	0.394095	0.329735	0.369234	0.378859									1.47192	0.485273
A48	0.400634	0.327283	0.383273	0.376999									1.48819	0.47997
A49	0.395333	0.265306	0.183673	0.377571									1.22188	0.584577
A50	0.397761	0.326449	0.379654	0.379534									1.4834	0.48152
A51	0.397711	0.329139	0.386642	0.380086									1.49358	0.478237
A52	0.394145	0.323423	0.383709	0.37982									1.4811	0.482267
A53	0.403952	0.325909	0.382087	0.379882									1.49183	0.478798
A54	0.398355	0.323235	0.38346	0.379923									1.48497	0.481009
A55	0.39786	0.323734	0.385332	0.379677									1.4866	0.480481
A56	0.396225	0.274292	0.387079	0.380025									1.43762	0.496852
A57	0.399247	0.321576	0.385456	0.379452									1.48573	0.480763
A58	0.396176	0.327462	0.372478	0.378696									1.47481	0.484323
A59	0.401179	0.325917	0.384021	0.37982									1.49094	0.479084
A60	0.398454	0.326767	0.384708	0.379412									1.48934	0.479598
A61	0.394739	0.33227	0.382774	0.374054									1.48384	0.481377
A62	0.265306	0.319858	0.344276	0.373359									1.3028	0.548269
A63	0.410937	0.350381	0.396687	0.3898									1.5478	0.461483
A64	0.400336	0.319899	0.381151	0.379432									1.48082	0.482358
A65	0.396275	0.316416	0.380902	0.380229									1.47382	0.484648
A66	0.399593	0.323742	0.385394	0.379902									1.48863	0.479826
A67	0.395482	0.327904	0.383023	0.379452									1.48586	0.480721
A68	0.399296	0.330136	0.381214	0.379268									1.48991	0.479413
A69	0.399445	0.324944	0.384521	0.379759									1.48867	0.479815
A70	0.39038	0.309769	0.385456	0.380025									1.46563	0.487357
A71	0.398652	0.341706	0.36992	0.379473									1.48975	0.479466
A72	0.397216	0.318771	0.385768	0.379984									1.48174	0.482058
A73	0.396225	0.331935	0.386954	0.379902									1.49502	0.477777
A74	0.397563	0.323881	0.384833	0.379227									1.4855	0.480837
A75	0.377996	0.324184	0.377907	0.376017									1.4561	0.490545
A76	0.368585	0.321314	0.374662	0.373236									1.4378	0.496791
A77	0.397414	0.326301	0.384396	0.379596									1.48771	0.480125
A78	0.393501	0.324429	0.382836	0.37978									1.48055	0.482447
A79	0.398107	0.322238	0.384021	0.380066									1.48443	0.481184
A80	0.397711	0.327503	0.380527	0.379064									1.48481	0.481063
A81	0.394145	0.323579	0.384645	0.380189									1.48256	0.481793
A82	0.39999	0.338787	0.381338	0.378921									1.49904	0.476496
A83	0.383148	0.325664	0.364554	0.378798									1.45216	0.491876
A84	0.396968	0.324519	0.382087	0.378737									1.48231	0.481873
A85	0.398306	0.325173	0.37772	0.379432									1.48063	0.48242
A86	0.408212	0.329695	0.385644	0.380332									1.50388	0.474961
A87	0.393748	0.326424	0.381151	0.379841									1.48116	0.482246
A88	0.399544	0.324838	0.386268	0.379923									1.49057	0.479202
A89	0.399593	0.3294	0.384833	0.379452									1.49328	0.478333
A90	0.399593	0.3294	0.384833	0.379452									1.49328	0.478333
A91	0.399643	0.3294	0.384957	0.379493									1.49349	0.478264
A92	0.395977	0.326686	0.384583	0.379596									1.48684	0.480404
A93	0.400336	0.33496	0.380964	0.378941									1.4952	0.477718
A94	0.397761	0.323129	0.385394	0.37982									1.4861	0.480643
A95	0.398405	0.326122	0.384333	0.379023									1.48788	0.480068
A96	0.400881	0.328918	0.387765	0.381252									1.49882	0.476566
A97	0.3989	0.338803	0.380278	0.379718									1.4977	0.476922
A98	0.392758	0.318395	0.37772	0.379616									1.46849	0.486408
A99	0.428571	0.321592	0.428571	0.428571									1.6073	0.444399
A100	0.394244	0.324159	0.382711	0.379105									1.48022	0.482554
A101	0.398949	0.337544	0.380091	0.379739									1.49632	0.47736
A102	0.398306	0.323039	0.382898	0.379636									1.48388	0.481363
A103	0.38825	0.322557	0.380902	0.379064									1.47077	0.485653
A104	0.395829	0.326342	0.376721	0.378573									1.47747	0.483453
A105	0.398999	0.330316	0.386143	0.37978									1.49524	0.477707
A106	0.400436	0.320938	0.400556	0.381804									1.50373	0.475008
A107	0.399395	0.325549	0.385581	0.380005									1.49053	0.479215
A108	0.397563	0.325999	0.385581	0.379882									1.48902	0.4797
A109	0.399395	0.343553	0.382961	0.379984									1.50589	0.474326
A110	0.398107	0.32577	0.385332	0.379923									1.48913	0.479665
A111	0.397612	0.324756	0.383647	0.379902									1.48592	0.480703
A112	0.396324	0.32532	0.387578	0.392478									1.5017	0.475651
A113	0.409005	0.328223	0.384021	0.375935									1.49718	0.477086
A114	0.399643	0.428571	0.371106	0.379616									1.57894	0.452384
A115	0.396473	0.316302	0.374787	0.37933									1.46689	0.486938
A116	0.396919	0.326514	0.383397	0.380025									1.48686	0.4804
A117	0.400089	0.324961	0.383834	0.379923									1.48881	0.47977
A118	0.394739	0.336906	0.3746	0.379309									1.48555	0.480821
A119	0.397959	0.32743	0.382836	0.379391									1.48762	0.480154
A120	0.398801	0.318011	0.38764	0.380802									1.48525	0.480918
A121	0.397216	0.332932	0.38034	0.380045									1.49053	0.479214
A122	0.399891	0.338321	0.381338	0.379268									1.49882	0.476566
A123	0.395185	0.318902	0.383335	0.379575									1.477	0.483606
A124	0.396225	0.324061	0.384645	0.379943									1.48487	0.481041
A125	0.394194	0.320169	0.382337	0.379759									1.47646	0.483782
A126	0.395234	0.326857	0.373414	0.379146									1.47465	0.484375
A127	0.397414	0.318804	0.381838	0.379493									1.47755	0.483426
A128	0.399693	0.327078	0.386642	0.380925									1.49434	0.477994
A129	0.396919	0.320136	0.382524	0.379923									1.4795	0.482788
A130	0.396522	0.320104	0.382462	0.380086									1.47917	0.482895
A131	0.399395	0.329744	0.383647	0.379289									1.49207	0.478719
A132	0.386913	0.324192	0.348581	0.376099									1.43578	0.497488
A133	0.398751	0.325729	0.388202	0.380229									1.49291	0.478451
A134	0.399445	0.324429	0.385394	0.379248									1.48852	0.479864
A135	0.397761	0.325852	0.384333	0.380025									1.48797	0.48004
A136	0.398949	0.325827	0.385207	0.379984									1.48997	0.479396
A137	0.396968	0.322818	0.382462	0.379902									1.48215	0.481925
A138	0.398702	0.323211	0.384895	0.380025									1.48683	0.480407
A139	0.398058	0.323587	0.384396	0.380189									1.48623	0.480602
A140	0.394838	0.323227	0.376097	0.379575									1.47374	0.484676
min	0.265306	0.265306	0.183673	0									0.714285	1		A1	0.357461	40
RADIS	Ranking Alternatives from Average Distance from the Ideal Solution															A2	0.349488	117
d-	C1	C2	C3	C4									S-	Ki-		A3	0.350495	110
A1	0.0339805	0.105589	0.0443624	0.0488528									0.232785	0.232785		A4	0.351465	103
A2	0.0326926	0.0921391	0.0470454	0.0488528									0.22073	0.22073		A5	0.355983	51
A3	0.0292252	0.101812	0.0423658	0.0488528									0.222255	0.222256		A6	0.354508	66
A4	0.0290271	0.0928504	0.0506019	0.0512453									0.223725	0.223725		A7	0.356616	47
A5	0.032445	0.103169	0.0460471	0.0488937									0.230555	0.230555		A8	0.3613	22
A6	0.0301664	0.104093	0.0451735	0.0488937									0.228326	0.228327		A9	0.365489	15
A7	0.0330889	0.102842	0.0462966	0.0492822									0.23151	0.23151		A10	0.356152	49
A8	0.0376956	0.107347	0.0447992	0.0487301									0.238572	0.238572		A11	0.351823	100
A9	0.0410144	0.108901	0.0459847	0.0489755									0.244875	0.244875		A12	0.352999	82
A10	0.0305131	0.120061	0.0373118	0.0429225									0.230809	0.230809		A13	0.356942	43
A11	0.0297701	0.10321	0.0427402	0.048546									0.224266	0.224266		A14	0.352578	89
A12	0.0291757	0.103578	0.0440504	0.0492413									0.226045	0.226045		A15	0.351893	97
A13	0.0314047	0.107543	0.0444872	0.0485665									0.232002	0.232002		A16	0.353811	73
A14	0.0301168	0.102229	0.0438009	0.0492617									0.225408	0.225408		A17	0.352506	90
A15	0.0285813	0.103382	0.0438009	0.0486074									0.224371	0.224371		A18	0.352362	93
A16	0.0320982	0.103741	0.0429273	0.0485051									0.227272	0.227272		A19	0.347997	124
A17	0.0287794	0.10034	0.0467958	0.0493844									0.2253	0.2253		A20	0.372513	10
A18	0.0302159	0.102147	0.043988	0.0487301									0.225081	0.225081		A21	0.367215	12
A19	0.0303645	0.0968814	0.0427402	0.0484847									0.218471	0.218471		A22	0.359241	28
A20	0.0388844	0.107494	0.0595866	0.0494458									0.255411	0.255411		A23	0.358612	31
A21	0.0385377	0.115368	0.0442376	0.0493231									0.247466	0.247467		A24	0.358145	33
A22	0.0374479	0.10469	0.0440504	0.0492822									0.23547	0.235471		A25	0.348745	120
A23	0.0304636	0.108124	0.0467334	0.0492004									0.234521	0.234521		A26	0.352814	85
A24	0.0296215	0.105189	0.0495411	0.0494662									0.233817	0.233818		A27	0.351317	105
A25	0.0280364	0.0971103	0.0428649	0.0515929									0.219605	0.219605		A28	0.341193	136
A26	0.030315	0.101754	0.044924	0.048771									0.225764	0.225765		A29	0.353248	76
A27	0.0291757	0.10209	0.0431769	0.0490572									0.2235	0.2235		A30	0.351012	108
A28	0.0280859	0.0861458	0.0441752	0.0497321									0.208139	0.208139		A31	0.37985	7
A29	0.0307113	0.102703	0.0441752	0.0488323									0.226422	0.226422		A32	0.628397	1
A30	0.0293738	0.105115	0.0405564	0.0479939									0.223039	0.223039		A33	0.351041	107
A31	0.0387853	0.103521	0.0710672	0.0530039									0.266377	0.266377		A34	0.343999	132
A32	0.0315533	0.105115	0.0447368	0.428571									0.609976	0.609977		A35	0.333131	137
A33	0.0298196	0.101043	0.0434889	0.0487301									0.223082	0.223082		A36	0.361287	23
A34	0.0292252	0.0830143	0.0514754	0.0486892									0.212404	0.212404		A37	0.350451	112
A35	0.0269962	0.0719681	0.0475445	0.0493435									0.195852	0.195853		A38	0.353233	78
A36	0.0398256	0.103872	0.0457975	0.0490572									0.238552	0.238553		A39	0.352197	95
A37	0.0291757	0.100119	0.0435513	0.0493435									0.22219	0.22219		A40	0.35299	83
A38	0.0294729	0.102834	0.0454231	0.0486687									0.226398	0.226399		A41	0.353072	80
A39	0.0302159	0.100561	0.0444872	0.0495685									0.224832	0.224833		A42	0.356754	46
A40	0.0313057	0.101051	0.0448616	0.0488119									0.22603	0.226031		A43	0.358103	34
A41	0.0298196	0.103226	0.0441752	0.0489346									0.226156	0.226156		A44	0.356096	50
A42	0.0311075	0.111116	0.0407435	0.0487505									0.231718	0.231718		A45	0.35574	54
A43	0.031801	0.10379	0.0491044	0.0490572									0.233753	0.233753		A46	0.355256	57
A44	0.0309589	0.107004	0.0441752	0.0485869									0.230725	0.230725		A47	0.363817	17
A45	0.0316029	0.0966606	0.0527233	0.0492004									0.230187	0.230187		A48	0.353033	81
A46	0.0313552	0.104673	0.0447992	0.0486278									0.229456	0.229456		A49	0.538489	2
A47	0.0344759	0.0988355	0.0593371	0.0497116									0.24236	0.24236		A50	0.356203	48
A48	0.0279373	0.101288	0.0452983	0.0515725									0.226097	0.226097		A51	0.349472	118
A49	0.0332375	0.163265	0.244898	0.0509999									0.4924	0.492401		A52	0.357727	38
A50	0.0308103	0.102122	0.0489172	0.0490368									0.230887	0.230887		A53	0.350626	109
A51	0.0308599	0.0994324	0.041929	0.0484847									0.220706	0.220706		A54	0.35516	59
A52	0.0344263	0.105148	0.0448616	0.0487505									0.233186	0.233186		A55	0.354081	69
A53	0.0246185	0.102662	0.0464838	0.0486892									0.222454	0.222454		A56	0.386758	5
A54	0.0302159	0.105336	0.0451111	0.0486483									0.229311	0.229311		A57	0.354658	63
A55	0.0307113	0.104837	0.0432393	0.0488937									0.227681	0.227681		A58	0.361897	21
A56	0.0323459	0.154279	0.0414923	0.048546									0.276663	0.276664		A59	0.351216	106
A57	0.0293243	0.106995	0.0431145	0.0491186									0.228553	0.228553		A60	0.352271	94
A58	0.0323954	0.101109	0.0560926	0.0498752									0.239472	0.239472		A61	0.355912	52
A59	0.0273925	0.102654	0.0445496	0.0487505									0.223346	0.223347		A62	0.479877	3
A60	0.0301168	0.101804	0.0438633	0.0491595									0.224943	0.224943		A63	0.313981	138
A61	0.0338319	0.0963008	0.0457975	0.0545171									0.230447	0.230448		A64	0.357912	37
A62	0.163265	0.108713	0.0842948	0.0552124									0.411485	0.411485		A65	0.362555	19
A63	0.0176342	0.0781903	0.0318835	0.0387714									0.166479	0.16648		A66	0.352739	86
A64	0.0282345	0.108672	0.0474197	0.049139									0.233465	0.233465		A67	0.354572	64
A65	0.0322964	0.112155	0.0476693	0.0483415									0.240462	0.240462		A68	0.351892	98
A66	0.0289776	0.104829	0.0431769	0.0486687									0.225652	0.225652		A69	0.352715	87
A67	0.0330889	0.100667	0.0455479	0.0491186									0.228422	0.228423		A70	0.368005	11
A68	0.0292748	0.0984349	0.0473573	0.0493026									0.22437	0.22437		A71	0.352	96
A69	0.0291262	0.103627	0.0440504	0.0488119									0.225615	0.225616		A72	0.357302	41
A70	0.0381909	0.118802	0.0431145	0.048546									0.248654	0.248654		A73	0.348523	121
A71	0.0299187	0.0868654	0.0586507	0.0490981									0.224533	0.224533		A74	0.354809	61
A72	0.0313552	0.1098	0.0428026	0.0485869									0.232545	0.232545		A75	0.374363	9
A73	0.0323459	0.0966361	0.0416171	0.0486687									0.219268	0.219268		A76	0.386639	6
A74	0.0310085	0.10469	0.0437385	0.0493435									0.22878	0.22878		A77	0.353351	75
A75	0.0505745	0.104387	0.0506642	0.052554									0.25818	0.25818		A78	0.358093	35
A76	0.059986	0.107257	0.0539088	0.0553351									0.276487	0.276487		A79	0.355518	55
A77	0.0311571	0.10227	0.0441752	0.0489755									0.226577	0.226578		A80	0.355271	56
A78	0.0350703	0.104142	0.0457351	0.0487914									0.233739	0.233739		A81	0.35676	45
A79	0.0304636	0.106333	0.0445496	0.0485051									0.229852	0.229852		A82	0.345872	130
A80	0.0308599	0.101068	0.0480437	0.0495071									0.229478	0.229479		A83	0.376998	8
A81	0.0344263	0.104992	0.0439257	0.0483824									0.231727	0.231727		A84	0.356923	44
A82	0.0285813	0.0897843	0.0472326	0.0496503									0.215248	0.215249		A85	0.358037	36
A83	0.0454229	0.102907	0.0640166	0.049773									0.26212	0.26212		A86	0.342681	134
A84	0.0316029	0.104052	0.0464838	0.0498343									0.231973	0.231973		A87	0.357683	39
A85	0.0302654	0.103398	0.0508514	0.049139									0.233654	0.233654		A88	0.351457	104
A86	0.0203586	0.0988764	0.0429273	0.0482393									0.210402	0.210402		A89	0.349669	114
A87	0.0348226	0.102147	0.0474197	0.0487301									0.233119	0.23312		A90	0.349669	114
A88	0.0290271	0.103733	0.0423034	0.0486483									0.223712	0.223712		A91	0.349527	116
A89	0.0289776	0.0991707	0.0437385	0.0491186									0.221005	0.221006		A92	0.353923	71
A90	0.0289776	0.0991707	0.0437385	0.0491186									0.221005	0.221006		A93	0.3484	122
A91	0.028928	0.0991707	0.0436137	0.0490777									0.22079	0.22079		A94	0.354411	67
A92	0.0325936	0.101885	0.043988	0.0489755									0.227442	0.227443		A95	0.353235	77
A93	0.0282345	0.0936108	0.0476069	0.0496298									0.219082	0.219082		A96	0.346017	128
A94	0.0308103	0.105442	0.0431769	0.0487505									0.22818	0.22818		A97	0.346753	127
A95	0.0301664	0.102449	0.0442376	0.049548									0.226401	0.226402		A98	0.366102	14
A96	0.0276897	0.0996531	0.0408059	0.0473191									0.215468	0.215468		A99	0.275689	140
A97	0.029671	0.089768	0.0482933	0.0488528									0.216585	0.216585		A100	0.35831	32
A98	0.0358133	0.110176	0.0508514	0.048955									0.245796	0.245796		A101	0.347661	125
A99	0	0.106979	0	0									0.106979	0.106979		A102	0.355884	53
A100	0.0343273	0.104412	0.0458599	0.0494662									0.234065	0.234065		A103	0.364582	16
A101	0.0296215	0.0910271	0.0484804	0.0488323									0.217961	0.217962		A104	0.360136	26
A102	0.0302654	0.105532	0.0456727	0.0489346									0.230405	0.230405		A105	0.348377	123
A103	0.0403209	0.106014	0.0476693	0.0495071									0.243512	0.243512		A106	0.342779	133
A104	0.0327422	0.102229	0.0518497	0.0499979									0.236818	0.236819		A107	0.351485	101
A105	0.029572	0.098255	0.0424282	0.0487914									0.219047	0.219047		A108	0.35248	91
A106	0.0281355	0.107633	0.0280151	0.046767									0.210551	0.210551		A109	0.341358	135
A107	0.0291757	0.103022	0.0429897	0.0485665									0.223754	0.223754		A110	0.352409	92
A108	0.0310085	0.102572	0.0429897	0.0486892									0.225259	0.22526		A111	0.354535	65
A109	0.0291757	0.0850175	0.0456103	0.0485869									0.20839	0.208391		A112	0.344117	131
A110	0.0304636	0.102801	0.0432393	0.0486483									0.225152	0.225152		A113	0.347093	126
A111	0.0309589	0.103815	0.044924	0.0486687									0.228366	0.228367		A114	0.293866	139
A112	0.0322468	0.103251	0.0409931	0.0360926									0.212583	0.212583		A115	0.367165	13
A113	0.019566	0.100348	0.0445496	0.0526358									0.2171	0.2171		A116	0.353915	72
A114	0.028928	0	0.0574652	0.048955									0.135348	0.135348		A117	0.352624	88
A115	0.0320982	0.112269	0.053784	0.0492413									0.247393	0.247393		A118	0.354775	62
A116	0.0316524	0.102057	0.0451735	0.048546									0.227429	0.227429		A119	0.353411	74
A117	0.0284822	0.10361	0.0447368	0.0486483									0.225478	0.225478		A120	0.354974	60
A118	0.0338319	0.0916649	0.0539712	0.0492617									0.22873	0.22873		A121	0.351482	102
A119	0.0306122	0.101141	0.0457351	0.0491799									0.226668	0.226669		A122	0.346016	129
A120	0.0297701	0.11056	0.0409307	0.047769									0.22903	0.22903		A123	0.360447	25
A121	0.0313552	0.0956386	0.0482309	0.0485256									0.22375	0.22375		A124	0.355225	58
A122	0.0286804	0.0902504	0.0472326	0.0493026									0.215466	0.215466		A125	0.360804	24
A123	0.0333861	0.109669	0.0452359	0.0489959									0.237287	0.237287		A126	0.362004	20
A124	0.0323459	0.10451	0.0439257	0.0486278									0.229409	0.229409		A127	0.360081	27
A125	0.0343768	0.108402	0.0462342	0.0488119									0.237825	0.237825		A128	0.348971	119
A126	0.0333366	0.101714	0.0551566	0.0494253									0.239632	0.239632		A129	0.358785	30
A127	0.0311571	0.109767	0.0467334	0.0490777									0.236735	0.236736		A130	0.359002	29
A128	0.0288785	0.101493	0.041929	0.0476463									0.219947	0.219947		A131	0.350464	111
A129	0.0316524	0.108435	0.0460471	0.0486483									0.234782	0.234782		A132	0.387994	4
A130	0.0320487	0.108467	0.0461095	0.0484847									0.23511	0.23511		A133	0.349912	113
A131	0.0291757	0.0988273	0.044924	0.0492822									0.222209	0.222209		A134	0.352816	84
A132	0.0416583	0.104379	0.0799896	0.0524722									0.278499	0.2785		A135	0.353177	79
A133	0.0298196	0.102842	0.0403692	0.0483415									0.221372	0.221372		A136	0.351856	99
A134	0.0291262	0.104142	0.0431769	0.0493231									0.225768	0.225768		A137	0.357029	42
A135	0.0308103	0.102719	0.0442376	0.048546									0.226313	0.226313		A138	0.353929	70
A136	0.0296215	0.102744	0.0433641	0.0485869									0.224316	0.224317		A139	0.354329	68
A137	0.0316029	0.105753	0.0461095	0.0486687									0.232134	0.232134		A140	0.362611	18
A138	0.0298692	0.10536	0.0436761	0.048546									0.227451	0.227452
A139	0.0305131	0.104984	0.0441752	0.0483824									0.228055	0.228055
A140	0.0337328	0.105344	0.0524737	0.0489959									0.240546	0.240547
max	0.163265	0.163265	0.244898	0.428571									0.999999

## Sheet: 20_03
xij	C1	C2	C3	C4
A1	-2.31	-19.12	-0.32	0.54
A2	-1.22	8.94	-0.85	-0.2
A3	-0.66	-12.25	-0.18	-4.46
A4	-0.08	28.04	-0.55	2.07
A5	-1.47	-9.97	-0.41	-0.08
A6	-0.98	-14.17	-0.42	-0.33
A7	-1.87	-2.89	-0.59	-0.67
A8	-2.36	-14.01	0.25	1.35
A9	-1.63	-27.07	0.49	3.53
A10	0.45	3	0.02	25.79
A11	-0.89	-7.23	-0.53	-1.37
A12	-0.52	-11.86	-0.21	-3.23
A13	-0.97	-7.1	-0.51	-0.98
A14	-0.82	-2.87	-0.28	-3.23
A15	-0.7	-27.72	-0.81	0.3
A16	-2.22	-21.83	-0.35	-0.45
A17	-0.56	-21.89	-0.48	-1.85
A18	-0.88	-5.09	-0.12	-0.31
A19	-1.93	-13.25	-0.21	-0.03
A20	-4.6	-31.97	-4.44	4.85
A21	0.32	-35.89	0.43	0.42
A22	-0.41	-7.3	0.14	0.81
A23	-0.96	-27.66	-0.32	-0.59
A24	-0.7	-5.05	-1.02	-0.76
A25	0.08	13	-0.09	-8.13
A26	-0.83	7.03	-0.13	0.24
A27	-0.65	-1.75	-0.23	-2.31
A28	-0.15	13.94	-0.22	-3.41
A29	-1.21	-5.09	-0.32	-0.96
A30	-0.37	0.92	-0.05	-4.35
A31	-0.45	-4.52	4.72	47.11
A32	-0.45	-20.56	-0.03	57.96
A33	-0.96	-13.02	-0.15	-1.27
A34	-0.85	19.01	0.64	0.64
A35	1.25	17.01	-1.77	-1.68
A36	-3.81	-8.65	-0.57	-0.05
A37	-0.49	0.09	-0.26	-3.2
A38	-1.47	-5.99	-0.37	-0.23
A39	-0.93	6.23	-0.35	-2.08
A40	-1.14	-4.64	-0.38	-0.18
A41	-0.87	-10.51	-0.21	-1.93
A42	-0.75	9	-0.81	-0.08
A43	-1.28	-18.37	-0.57	0.13
A44	-0.61	-14.19	0.01	0.74
A45	-1.26	-12.97	0.87	1.72
A46	-1.33	-14.81	-0.37	-0.73
A47	-1.87	4.22	-2.16	1.33
A48	-2.82	8.55	-0.52	41.65
A49	-1.81	-120.05	-21.73	0.67
A50	-1.04	-23	1.07	1.27
A51	-1.04	-9.84	-0.45	-0.1
A52	-2.93	-28.3	-0.56	1.96
A53	-1.17	-8.72	-0.62	0.02
A54	-0.82	-4.89	-0.52	0.07
A55	-1.06	-4.64	-0.13	-0.95
A56	-1	-28.98	0.63	-1.42
A57	-0.24	4.24	-0.15	-1.83
A58	-0.18	16.76	-1.16	0.98
A59	-1.22	-16.59	-0.6	-0.47
A60	-1.06	-10.57	-0.25	-2.12
A61	3.08	-6.87	1.26	11.79
A62	-16.04	-28.09	4.46	16.4
A63	-0.62	27.29	-1.18	0.92
A64	-1.09	-29.4	-0.86	-0.29
A65	-2.56	-26.33	-1.03	0.61
A66	-0.75	-12.39	0.08	0.31
A67	-0.98	-0.81	-0.17	-0.29
A68	-0.41	32.16	-0.68	-0.08
A69	-0.62	-10.69	-0.38	-1.92
A70	-2.81	-27.15	-0.21	-0.17
A71	0.01	40.41	3.29	1.78
A72	-0.63	-10.95	0.02	-3.84
A73	-0.29	-16.84	0.4	3.89
A74	-0.54	2.96	-0.2	-2.26
A75	-4.32	-10.58	-0.86	1.54
A76	-3.16	-12.45	-0.69	4.7
A77	-1.75	-12.14	-0.42	-0.96
A78	-2.76	-18.81	0.08	1.63
A79	-0.67	12.55	-0.21	0.63
A80	-0.66	-4.64	-0.42	-0.26
A81	-3.28	-13.55	-0.43	1.44
A82	-0.33	-3.2	-0.68	-5.97
A83	-2.59	2.34	-0.67	9.49
A84	-0.79	-18.63	0.04	0.14
A85	-1.48	-40.8	-1.05	-1.19
A86	-0.67	-9.11	-0.22	0.5
A87	-4.54	-2.31	-1.25	7.44
A88	-0.84	-14.09	-0.31	-1.95
A89	-0.72	-6.43	-0.19	-1.81
A90	-0.72	-6.43	-0.2	-1.82
A91	-0.72	-6.43	-0.2	-1.82
A92	-1.05	0.64	-0.19	-0.37
A93	-0.67	0.4	-0.74	-2.16
A94	-0.99	-12.08	0.01	-1.27
A95	-0.77	-12.44	-0.14	-2.77
A96	-2.42	-5.13	-1.1	2.04
A97	-0.94	-54.59	0.79	-1.06
A98	-1.94	-12.28	-1.04	1.68
A99	-1.78	-1.67	-0.28	57.61
A100	-0.93	-7.98	-0.41	-0.57
A101	0.42	32.25	0.49	2.01
A102	-1.77	-50.28	-0.56	0.36
A103	-4.6	-14.24	-0.39	7.9
A104	-0.04	-6.24	-0.48	1.15
A105	-0.41	0.41	-0.83	-4.71
A106	-0.05	0.29	0.58	0.62
A107	-0.85	-15.93	-0.32	-1.31
A108	-1.05	-3.15	0.08	-0.89
A109	-0.41	22.73	1.9	0.45
A110	-0.86	-0.87	-0.02	-0.8
A111	-1.31	-7.09	0.3	0.65
A112	3.22	-0.08	0.21	37.06
A113	0.76	5.82	1.44	6.08
A114	-0.6	146.32	-0.56	0.15
A115	-1.02	-14.42	-0.3	0.59
A116	-2.01	-12.13	-0.07	-0.14
A117	-0.31	-38.52	0.27	1.93
A118	-0.72	2.65	0.68	0.86
A119	-0.81	-4.17	-0.2	-0.96
A120	-0.98	-12.63	-0.08	-9.31
A121	-1.3	13.63	-0.52	-0.08
A122	-0.55	-60.88	1.3	-2
A123	-0.66	-23.45	-0.25	4.92
A124	-0.81	-6.66	0.01	0.01
A125	-1.61	-32.79	0.23	6.52
A126	-0.47	9.14	1.6	3.28
A127	-1.12	-44.64	0.02	1.23
A128	-0.47	3.48	-0.32	-2.69
A129	-1.86	-24	-0.67	-0.08
A130	-1.37	-3.4	-1.03	0.07
A131	-0.55	-1.14	-0.04	-1.39
A132	-1.64	-29.87	-4.33	4.26
A133	-1.65	-25.71	-0.67	-0.48
A134	-0.9	-23.94	-0.17	0.12
A135	-1.83	-4.03	-0.09	-0.14
A136	-0.36	-3.54	-0.19	-2.07
A137	-1.6	-24.48	-0.69	0.25
A138	-0.67	-3.54	-0.25	-0.62
A139	-1.58	-17.69	-0.89	0.07
A140	-1.03	0.73	-0.61	0.47
MAX	3.22	146.32	4.72	57.96
MIN	-16.04	-120.05	-21.73	-9.31
	1	1	1	1
	Normalizacija
nij	C1	C2	C3	C4
A1	0.712876	0.378909	0.809452	0.146425
A2	0.76947	0.484251	0.789414	0.135424
A3	0.798546	0.4047	0.814745	0.0720975
A4	0.82866	0.555956	0.800756	0.169169
A5	0.75649	0.41326	0.806049	0.137208
A6	0.781931	0.397492	0.805671	0.133492
A7	0.735722	0.439839	0.799244	0.128438
A8	0.71028	0.398093	0.831002	0.158466
A9	0.748183	0.349063	0.840076	0.190873
A10	0.856179	0.461951	0.822306	0.521778
A11	0.786604	0.423546	0.801512	0.118032
A12	0.805815	0.406164	0.813611	0.090382
A13	0.782451	0.424034	0.802268	0.123829
A14	0.790239	0.439914	0.810964	0.090382
A15	0.796469	0.346623	0.790926	0.142857
A16	0.717549	0.368735	0.808318	0.131708
A17	0.803738	0.36851	0.803403	0.110896
A18	0.787124	0.43158	0.817013	0.133789
A19	0.732606	0.400946	0.813611	0.137952
A20	0.593977	0.330668	0.653686	0.210495
A21	0.849429	0.315951	0.837807	0.144641
A22	0.811526	0.423283	0.826843	0.150439
A23	0.78297	0.346848	0.809452	0.129627
A24	0.796469	0.43173	0.782987	0.1271
A25	0.836968	0.499493	0.818147	0.0175413
A26	0.78972	0.477081	0.816635	0.141965
A27	0.799065	0.444119	0.812854	0.104058
A28	0.825026	0.503022	0.813233	0.0877063
A29	0.76999	0.43158	0.809452	0.124127
A30	0.813603	0.454143	0.81966	0.0737327
A31	0.80945	0.43372	1	0.83871
A32	0.80945	0.373503	0.820416	1
A33	0.78297	0.40181	0.815879	0.119518
A34	0.788681	0.522056	0.845747	0.147911
A35	0.897715	0.514547	0.754631	0.113424
A36	0.634995	0.418215	0.8	0.137654
A37	0.807373	0.451027	0.81172	0.090828
A38	0.75649	0.428201	0.807561	0.134978
A39	0.784528	0.474077	0.808318	0.107477
A40	0.773624	0.43327	0.807183	0.135722
A41	0.787643	0.411232	0.813611	0.109707
A42	0.793873	0.484476	0.790926	0.137208
A43	0.766355	0.381725	0.8	0.14033
A44	0.801142	0.397417	0.821928	0.149398
A45	0.767394	0.401997	0.854442	0.163966
A46	0.763759	0.39509	0.807561	0.127546
A47	0.735722	0.466532	0.739887	0.158169
A48	0.686397	0.482787	0.80189	0.757544
A49	0.738837	0	0	0.148357
A50	0.778816	0.364343	0.862004	0.157277
A51	0.778816	0.413748	0.804537	0.136911
A52	0.680685	0.344446	0.800378	0.167534
A53	0.772066	0.417952	0.79811	0.138695
A54	0.790239	0.432331	0.80189	0.139438
A55	0.777778	0.43327	0.816635	0.124275
A56	0.780893	0.341893	0.845369	0.117289
A57	0.820353	0.466607	0.815879	0.111194
A58	0.823468	0.513609	0.777694	0.152966
A59	0.76947	0.388407	0.798866	0.131411
A60	0.777778	0.411007	0.812098	0.106883
A61	0.992731	0.424898	0.869187	0.313661
A62	0	0.345234	0.99017	0.382191
A63	0.800623	0.55314	0.776938	0.152074
A64	0.77622	0.340316	0.789036	0.134087
A65	0.699896	0.351841	0.782609	0.147465
A66	0.793873	0.404175	0.824575	0.143006
A67	0.781931	0.447648	0.815123	0.134087
A68	0.811526	0.571423	0.795841	0.137208
A69	0.800623	0.410557	0.807183	0.109856
A70	0.686916	0.348763	0.813611	0.13587
A71	0.833333	0.602395	0.945936	0.164858
A72	0.800104	0.409581	0.822306	0.0813141
A73	0.817757	0.387469	0.836673	0.196224
A74	0.804777	0.461801	0.813989	0.104802
A75	0.608515	0.41097	0.789036	0.16129
A76	0.668744	0.403949	0.795463	0.208265
A77	0.741952	0.405113	0.805671	0.124127
A78	0.689512	0.380073	0.824575	0.162628
A79	0.798027	0.497804	0.813611	0.147763
A80	0.798546	0.43327	0.805671	0.134532
A81	0.662513	0.39982	0.805293	0.159804
A82	0.81568	0.438676	0.795841	0.0496507
A83	0.698339	0.459474	0.796219	0.279471
A84	0.791796	0.380749	0.823062	0.140479
A85	0.755971	0.297518	0.781853	0.120708
A86	0.798027	0.416488	0.813233	0.14583
A87	0.597092	0.442017	0.774291	0.248997
A88	0.7892	0.397793	0.80983	0.10941
A89	0.795431	0.42655	0.814367	0.111491
A90	0.795431	0.42655	0.813989	0.111342
A91	0.795431	0.42655	0.813989	0.111342
A92	0.778297	0.453092	0.814367	0.132897
A93	0.798027	0.452191	0.793573	0.106288
A94	0.781412	0.405338	0.821928	0.119518
A95	0.792835	0.403987	0.816257	0.0972202
A96	0.707165	0.43143	0.779962	0.168723
A97	0.784008	0.245748	0.851418	0.12264
A98	0.732087	0.404588	0.782231	0.163371
A99	0.740395	0.444419	0.810964	0.994797
A100	0.784528	0.420731	0.806049	0.129924
A101	0.854621	0.571761	0.840076	0.168277
A102	0.740914	0.261929	0.800378	0.143749
A103	0.593977	0.397229	0.806805	0.255835
A104	0.830737	0.427263	0.803403	0.155493
A105	0.811526	0.452228	0.79017	0.0683812
A106	0.830218	0.451778	0.843478	0.147614
A107	0.788681	0.390885	0.809452	0.118924
A108	0.778297	0.438863	0.824575	0.125167
A109	0.811526	0.536021	0.893384	0.145087
A110	0.788162	0.447423	0.820794	0.126505
A111	0.764798	0.424072	0.832892	0.14806
A112	1	0.450389	0.82949	0.689312
A113	0.872274	0.472538	0.875992	0.22878
A114	0.801661	1	0.800378	0.140627
A115	0.779855	0.396554	0.810208	0.147168
A116	0.728453	0.405151	0.818904	0.136316
A117	0.816719	0.306078	0.831758	0.167088
A118	0.795431	0.460637	0.847259	0.151182
A119	0.790758	0.435034	0.813989	0.124127
A120	0.781931	0.403274	0.818526	0
A121	0.765317	0.501858	0.80189	0.137208
A122	0.804258	0.222135	0.870699	0.108667
A123	0.798546	0.362653	0.812098	0.211536
A124	0.790758	0.425686	0.821928	0.138546
A125	0.749221	0.327589	0.830246	0.23532
A126	0.808411	0.485002	0.882042	0.187156
A127	0.774663	0.283102	0.822306	0.156682
A128	0.808411	0.463753	0.809452	0.0984094
A129	0.736241	0.360589	0.796219	0.137208
A130	0.761682	0.437925	0.782609	0.139438
A131	0.804258	0.446409	0.820038	0.117735
A132	0.747664	0.338552	0.657845	0.201724
A133	0.747144	0.354169	0.796219	0.131262
A134	0.786085	0.360814	0.815123	0.140181
A135	0.737799	0.43556	0.818147	0.136316
A136	0.814123	0.437399	0.814367	0.107626
A137	0.74974	0.358787	0.795463	0.142114
A138	0.798027	0.437399	0.812098	0.129181
A139	0.750779	0.384278	0.787902	0.139438
A140	0.779335	0.453429	0.798488	0.145384
	0.163265	0.163265	0.244898	0.428571
vij	C1	C2	C3	C4
A1	0.116388	0.0618626	0.198233	0.0627534
A2	0.125628	0.0790613	0.193326	0.058039
A3	0.130375	0.0660734	0.199529	0.0308989
A4	0.135291	0.0907682	0.196104	0.0725009
A5	0.123508	0.0674709	0.1974	0.0588035
A6	0.127662	0.0648966	0.197307	0.0572108
A7	0.120118	0.0718104	0.195733	0.0550446
A8	0.115964	0.0649946	0.203511	0.0679139
A9	0.122152	0.0569898	0.205733	0.0818025
A10	0.139784	0.0754205	0.201381	0.223619
A11	0.128425	0.0691503	0.196289	0.050585
A12	0.131561	0.0663124	0.199252	0.0387351
A13	0.127747	0.0692299	0.196474	0.0530697
A14	0.129018	0.0718226	0.198603	0.0387351
A15	0.130036	0.0565914	0.193696	0.0612244
A16	0.117151	0.0602016	0.197955	0.0564462
A17	0.131222	0.0601648	0.196752	0.047527
A18	0.12851	0.0704619	0.200085	0.0573382
A19	0.119609	0.0654605	0.199252	0.059122
A20	0.0969757	0.0539865	0.160086	0.0902121
A21	0.138682	0.0515838	0.205177	0.0619889
A22	0.132494	0.0691074	0.202492	0.0644736
A23	0.127832	0.0566282	0.198233	0.0555543
A24	0.130036	0.0704864	0.191752	0.0544713
A25	0.136648	0.0815498	0.200363	0.00751767
A26	0.128934	0.0778906	0.199992	0.0608422
A27	0.130459	0.0725091	0.199066	0.0445964
A28	0.134698	0.0821259	0.199159	0.0375884
A29	0.125712	0.0704619	0.198233	0.0531971
A30	0.132833	0.0741456	0.200733	0.0315997
A31	0.132155	0.0708113	0.244898	0.359447
A32	0.132155	0.06098	0.200918	0.428571
A33	0.127832	0.0656014	0.199807	0.0512221
A34	0.128764	0.0852334	0.207122	0.0633905
A35	0.146566	0.0840076	0.184808	0.04861
A36	0.103672	0.0682799	0.195918	0.0589946
A37	0.131816	0.0736369	0.198789	0.0389262
A38	0.123508	0.0699103	0.19777	0.0578478
A39	0.128086	0.0774002	0.197955	0.0460617
A40	0.126306	0.0707377	0.197678	0.0581664
A41	0.128594	0.0671399	0.199252	0.0470173
A42	0.129612	0.0790981	0.193696	0.0588035
A43	0.125119	0.0623223	0.195918	0.0601414
A44	0.130798	0.0648843	0.201289	0.0640276
A45	0.125289	0.0656321	0.209251	0.0702711
A46	0.124695	0.0645043	0.19777	0.0546624
A47	0.120118	0.0761683	0.181197	0.0677865
A48	0.112065	0.0788222	0.196381	0.324661
A49	0.120626	0	0	0.0635817
A50	0.127153	0.0594844	0.211103	0.0674042
A51	0.127153	0.0675505	0.197029	0.0586761
A52	0.111132	0.0562359	0.196011	0.0718001
A53	0.126051	0.068237	0.195455	0.0594406
A54	0.129018	0.0705845	0.196381	0.0597591
A55	0.126984	0.0707377	0.199992	0.0532608
A56	0.127493	0.0558191	0.207029	0.0502665
A57	0.133935	0.0761805	0.199807	0.0476544
A58	0.134444	0.0838544	0.190456	0.0655566
A59	0.125628	0.0634133	0.195641	0.0563188
A60	0.126984	0.0671031	0.198881	0.0458068
A61	0.162078	0.0693709	0.212862	0.134426
A62	0	0.0563646	0.242491	0.163796
A63	0.130714	0.0903085	0.19027	0.0651744
A64	0.12673	0.0555617	0.193233	0.0574656
A65	0.114269	0.0574434	0.191659	0.0631994
A66	0.129612	0.0659876	0.201937	0.0612881
A67	0.127662	0.0730853	0.199622	0.0574656
A68	0.132494	0.0932934	0.1949	0.0588035
A69	0.130714	0.0670295	0.197678	0.047081
A70	0.112149	0.0569408	0.199252	0.0582301
A71	0.136054	0.09835	0.231658	0.0706534
A72	0.130629	0.0668702	0.201381	0.0348489
A73	0.133511	0.0632601	0.2049	0.084096
A74	0.131392	0.075396	0.199344	0.0449149
A75	0.0993492	0.067097	0.193233	0.0691244
A76	0.109182	0.0659508	0.194807	0.0892564
A77	0.121135	0.0661408	0.197307	0.0531971
A78	0.112573	0.0620526	0.201937	0.0696977
A79	0.13029	0.0812739	0.199252	0.0633268
A80	0.130375	0.0707377	0.197307	0.0576567
A81	0.108165	0.0652766	0.197215	0.0684873
A82	0.133172	0.0716204	0.1949	0.0212788
A83	0.114014	0.075016	0.194993	0.119773
A84	0.129273	0.0621629	0.201566	0.0602051
A85	0.123424	0.0485744	0.191474	0.0517318
A86	0.13029	0.067998	0.199159	0.0624986
A87	0.0974843	0.0721659	0.189622	0.106713
A88	0.128849	0.0649456	0.198326	0.0468899
A89	0.129866	0.0696406	0.199437	0.0477818
A90	0.129866	0.0696406	0.199344	0.0477181
A91	0.129866	0.0696406	0.199344	0.0477181
A92	0.127069	0.073974	0.199437	0.0569559
A93	0.13029	0.0738269	0.194344	0.045552
A94	0.127577	0.0661776	0.201289	0.0512221
A95	0.129442	0.0659569	0.1999	0.0416657
A96	0.115455	0.0704374	0.191011	0.0723098
A97	0.128001	0.0401221	0.208511	0.05256
A98	0.119524	0.066055	0.191567	0.0700163
A99	0.120881	0.0725581	0.198603	0.426341
A100	0.128086	0.0686906	0.1974	0.0556817
A101	0.13953	0.0933486	0.205733	0.0721187
A102	0.120965	0.0427638	0.196011	0.0616067
A103	0.0969757	0.0648537	0.197585	0.109643
A104	0.13563	0.0697571	0.196752	0.0666397
A105	0.132494	0.073833	0.193511	0.0293062
A106	0.135546	0.0737595	0.206566	0.0632631
A107	0.128764	0.0638178	0.198233	0.0509673
A108	0.127069	0.071651	0.201937	0.053643
A109	0.132494	0.0875135	0.218788	0.0621801
A110	0.128679	0.0730485	0.201011	0.0542164
A111	0.124865	0.0692361	0.203974	0.0634542
A112	0.163265	0.0735327	0.20314	0.295419
A113	0.142412	0.0771489	0.214529	0.0980483
A114	0.130883	0.163265	0.196011	0.0602688
A115	0.127323	0.0647433	0.198418	0.063072
A116	0.118931	0.0661469	0.200548	0.0584212
A117	0.133342	0.0499718	0.203696	0.071609
A118	0.129866	0.075206	0.207492	0.0647921
A119	0.129103	0.0710258	0.199344	0.0531971
A120	0.127662	0.0658405	0.200455	0
A121	0.124949	0.0819359	0.196381	0.0588035
A122	0.131307	0.0362668	0.213233	0.0465713
A123	0.130375	0.0592086	0.198881	0.090658
A124	0.129103	0.0694996	0.201289	0.0593769
A125	0.122322	0.0534839	0.203326	0.100851
A126	0.131985	0.0791839	0.21601	0.0802097
A127	0.126475	0.0462207	0.201381	0.0671494
A128	0.131985	0.0757147	0.198233	0.0421754
A129	0.120202	0.0588715	0.194993	0.0588035
A130	0.124356	0.0714978	0.191659	0.0597591
A131	0.131307	0.072883	0.200826	0.0504576
A132	0.122067	0.0552736	0.161105	0.0864532
A133	0.121983	0.0578234	0.194993	0.0562551
A134	0.12834	0.0589083	0.199622	0.0600777
A135	0.120457	0.0711116	0.200363	0.0584212
A136	0.132918	0.071412	0.199437	0.0461254
A137	0.122406	0.0585773	0.194807	0.0609059
A138	0.13029	0.071412	0.198881	0.0553632
A139	0.122576	0.0627391	0.192956	0.0597591
A140	0.127238	0.0740292	0.195548	0.0623075
max=ti	0.163265	0.163265	0.244898	0.428571									0.428571
min=tai	0	0	0	0									0
d+	C1	C2	C3	C4									S+	Ki+
A1	0.312183	0.366708	0.230338	0.365818									1.27505	0.560203
A2	0.302943	0.34951	0.235245	0.370532									1.25823	0.56769
A3	0.298196	0.362498	0.229042	0.397672									1.28741	0.554824
A4	0.29328	0.337803	0.232467	0.35607									1.21962	0.585662
A5	0.305063	0.3611	0.231171	0.369768									1.2671	0.563716
A6	0.300909	0.363674	0.231264	0.37136									1.26721	0.563669
A7	0.308453	0.356761	0.232838	0.373526									1.27158	0.561731
A8	0.312607	0.363576	0.22506	0.360657									1.2619	0.566039
A9	0.306419	0.371581	0.222838	0.346769									1.24761	0.572524
A10	0.288787	0.353151	0.22719	0.204952									1.07408	0.665021
A11	0.300146	0.359421	0.232282	0.377986									1.26984	0.562502
A12	0.29701	0.362259	0.229319	0.389836									1.27842	0.558723
A13	0.300824	0.359341	0.232097	0.375501									1.26776	0.563421
A14	0.299553	0.356748	0.229968	0.389836									1.2761	0.559739
A15	0.298535	0.37198	0.234875	0.367347									1.27274	0.56122
A16	0.31142	0.368369	0.230616	0.372125									1.28253	0.556934
A17	0.297349	0.368406	0.231819	0.381044									1.27862	0.558638
A18	0.300061	0.358109	0.228486	0.371233									1.25789	0.567844
A19	0.308962	0.363111	0.229319	0.369449									1.27084	0.562057
A20	0.331595	0.374585	0.268485	0.338359									1.31302	0.544
A21	0.289889	0.376987	0.223394	0.366582									1.25685	0.568313
A22	0.296077	0.359464	0.226079	0.364097									1.24572	0.573393
A23	0.300739	0.371943	0.230338	0.373017									1.27604	0.559768
A24	0.298535	0.358085	0.236819	0.3741									1.26754	0.563521
A25	0.291923	0.347021	0.228208	0.421053									1.28821	0.55448
A26	0.299637	0.35068	0.228579	0.367729									1.24663	0.572975
A27	0.298112	0.356062	0.229505	0.383975									1.26765	0.563471
A28	0.293873	0.346445	0.229412	0.390983									1.26071	0.566572
A29	0.302859	0.358109	0.230338	0.375374									1.26668	0.563903
A30	0.295738	0.354425	0.227838	0.396971									1.27497	0.560236
A31	0.296416	0.35776	0.183673	0.0691244									0.906973	0.787548
A32	0.296416	0.367591	0.227653	0									0.89166	0.801073
A33	0.300739	0.36297	0.228764	0.377349									1.26982	0.562508
A34	0.299807	0.343338	0.221449	0.36518									1.22977	0.580826
A35	0.282005	0.344563	0.243763	0.379961									1.25029	0.571294
A36	0.324899	0.360291	0.232653	0.369576									1.28742	0.55482
A37	0.296755	0.354934	0.229782	0.389645									1.27112	0.561935
A38	0.305063	0.358661	0.230801	0.370723									1.26525	0.564542
A39	0.300485	0.351171	0.230616	0.382509									1.26478	0.56475
A40	0.302265	0.357833	0.230893	0.370405									1.2614	0.566265
A41	0.299977	0.361431	0.229319	0.381554									1.27228	0.561421
A42	0.298959	0.349473	0.234875	0.369768									1.25307	0.570026
A43	0.303452	0.366249	0.232653	0.36843									1.27078	0.562083
A44	0.297773	0.363687	0.227282	0.364543									1.25329	0.56993
A45	0.303282	0.362939	0.21932	0.3583									1.24384	0.574257
A46	0.303876	0.364067	0.230801	0.373909									1.27265	0.561257
A47	0.308453	0.352403	0.247374	0.360785									1.26901	0.562866
A48	0.316506	0.349749	0.23219	0.10391									1.00235	0.712607
A49	0.307945	0.428571	0.428571	0.364989									1.53008	0.46683
A50	0.301418	0.369087	0.217468	0.361167									1.24914	0.571822
A51	0.301418	0.36102	0.231542	0.369895									1.26387	0.565155
A52	0.317439	0.372335	0.23256	0.356771									1.2791	0.558426
A53	0.30252	0.360334	0.233116	0.36913									1.2651	0.564608
A54	0.299553	0.357986	0.23219	0.368812									1.25854	0.56755
A55	0.301587	0.357833	0.228579	0.37531									1.26331	0.565408
A56	0.301078	0.372752	0.221542	0.378305									1.27368	0.560806
A57	0.294636	0.35239	0.228764	0.380917									1.25671	0.568378
A58	0.294127	0.344717	0.238115	0.363014									1.23997	0.576048
A59	0.302943	0.365158	0.23293	0.372252									1.27328	0.560979
A60	0.301587	0.361468	0.22969	0.382764									1.27551	0.56
A61	0.266493	0.3592	0.215709	0.294145									1.13555	0.629023
A62	0.428571	0.372206	0.18608	0.264775									1.25163	0.570683
A63	0.297857	0.338263	0.238301	0.363397									1.23782	0.577052
A64	0.301841	0.373009	0.235338	0.371105									1.28129	0.557472
A65	0.314302	0.371128	0.236912	0.365372									1.28771	0.554693
A66	0.298959	0.362583	0.226634	0.367283									1.25546	0.568943
A67	0.300909	0.355486	0.228949	0.371105									1.25645	0.568495
A68	0.296077	0.335278	0.233671	0.369768									1.23479	0.578465
A69	0.297857	0.361541	0.230893	0.38149									1.27178	0.561641
A70	0.316422	0.37163	0.229319	0.370341									1.28771	0.554693
A71	0.292517	0.330221	0.196913	0.357918									1.17757	0.606576
A72	0.297942	0.361701	0.22719	0.393722									1.28055	0.557793
A73	0.29506	0.365311	0.223671	0.344475									1.22852	0.58142
A74	0.297179	0.353175	0.229227	0.383656									1.26324	0.56544
A75	0.329222	0.361474	0.235338	0.359447									1.28548	0.555656
A76	0.319389	0.36262	0.233764	0.339315									1.25509	0.569112
A77	0.307436	0.36243	0.231264	0.375374									1.2765	0.559563
A78	0.315998	0.366518	0.226634	0.358873									1.26802	0.563306
A79	0.298281	0.347297	0.229319	0.365244									1.24014	0.57597
A80	0.298196	0.357833	0.231264	0.370914									1.25821	0.5677
A81	0.320406	0.363294	0.231356	0.360084									1.27514	0.560162
A82	0.295399	0.356951	0.233671	0.407292									1.29331	0.552291
A83	0.314557	0.353555	0.233578	0.308798									1.21049	0.59008
A84	0.299298	0.366408	0.227005	0.368366									1.26108	0.566409
A85	0.305147	0.379997	0.237097	0.376839									1.29908	0.549839
A86	0.298281	0.360573	0.229412	0.366072									1.25434	0.569452
A87	0.331087	0.356405	0.238949	0.321858									1.2483	0.572207
A88	0.299722	0.363625	0.230245	0.381681									1.27527	0.560103
A89	0.298705	0.35893	0.229134	0.380789									1.26756	0.563512
A90	0.298705	0.35893	0.229227	0.380853									1.26772	0.563443
A91	0.298705	0.35893	0.229227	0.380853									1.26772	0.563443
A92	0.301502	0.354597	0.229134	0.371615									1.25685	0.568314
A93	0.298281	0.354744	0.234227	0.383019									1.27027	0.562309
A94	0.300994	0.362393	0.227282	0.377349									1.26802	0.563308
A95	0.299129	0.362614	0.228671	0.386905									1.27732	0.559206
A96	0.313116	0.358134	0.23756	0.356261									1.26507	0.564621
A97	0.30057	0.388449	0.22006	0.376011									1.28509	0.555825
A98	0.309047	0.362516	0.237004	0.358555									1.26712	0.563707
A99	0.30769	0.356013	0.229968	0.00222982									0.895901	0.797281
A100	0.300485	0.35988	0.231171	0.372889									1.26443	0.564909
A101	0.289041	0.335222	0.222838	0.356452									1.20355	0.59348
A102	0.307606	0.385807	0.23256	0.366964									1.29294	0.552451
A103	0.331595	0.363717	0.230986	0.318928									1.24523	0.573619
A104	0.292941	0.358814	0.231819	0.361931									1.24551	0.57349
A105	0.296077	0.354738	0.23506	0.399265									1.28514	0.555803
A106	0.293025	0.354812	0.222005	0.365308									1.23515	0.578298
A107	0.299807	0.364753	0.230338	0.377604									1.2725	0.561323
A108	0.301502	0.35692	0.226634	0.374928									1.25998	0.5669
A109	0.296077	0.341057	0.209783	0.366391									1.21331	0.588708
A110	0.299892	0.355523	0.22756	0.374355									1.25733	0.568097
A111	0.303706	0.359335	0.224597	0.365117									1.25276	0.570171
A112	0.265306	0.355038	0.225431	0.133152									0.978927	0.729661
A113	0.286159	0.351422	0.214042	0.330523									1.18215	0.604227
A114	0.297688	0.265306	0.23256	0.368302									1.16386	0.613723
A115	0.301248	0.363828	0.230153	0.365499									1.26073	0.566566
A116	0.30964	0.362424	0.228023	0.37015									1.27024	0.562324
A117	0.295229	0.378599	0.224875	0.356962									1.25567	0.56885
A118	0.298705	0.353365	0.221079	0.363779									1.23693	0.577467
A119	0.299468	0.357545	0.229227	0.375374									1.26161	0.566168
A120	0.300909	0.362731	0.228116	0.428571									1.32033	0.540991
A121	0.303622	0.346635	0.23219	0.369768									1.25221	0.570418
A122	0.297264	0.392304	0.215338	0.382									1.28691	0.55504
A123	0.298196	0.369362	0.22969	0.337913									1.23516	0.578293
A124	0.299468	0.359071	0.227282	0.369194									1.25502	0.569144
A125	0.306249	0.375087	0.225245	0.32772									1.2343	0.578696
A126	0.296586	0.349387	0.212561	0.348361									1.20689	0.591837
A127	0.302096	0.38235	0.22719	0.361422									1.27306	0.561078
A128	0.296586	0.352856	0.230338	0.386396									1.26618	0.564128
A129	0.308369	0.369699	0.233578	0.369768									1.28141	0.557419
A130	0.304215	0.357073	0.236912	0.368812									1.26701	0.563756
A131	0.297264	0.355688	0.227745	0.378113									1.25881	0.567428
A132	0.306504	0.373297	0.267466	0.342118									1.28938	0.553973
A133	0.306588	0.370748	0.233578	0.372316									1.28323	0.55663
A134	0.300231	0.369663	0.228949	0.368493									1.26734	0.563611
A135	0.308114	0.357459	0.228208	0.37015									1.26393	0.565129
A136	0.295653	0.357159	0.229134	0.382446									1.26439	0.564924
A137	0.306165	0.369994	0.233764	0.367665									1.27759	0.559089
A138	0.298281	0.357159	0.22969	0.373208									1.25834	0.567642
A139	0.305995	0.365832	0.235615	0.368812									1.27625	0.559673
A140	0.301333	0.354542	0.233023	0.366264									1.25516	0.569078
min	0.265306	0.265306	0.183673	0									0.714285	1		A1	0.49972	107
RADIS	Ranking Alternatives from Average Distance from the Ideal Solution															A2	0.511872	53
d-	C1	C2	C3	C4									S-	Ki-		A3	0.49085	129
A1	0.116388	0.0618626	0.198233	0.0627534									0.439237	0.439237		A4	0.540163	15
A2	0.125628	0.0790613	0.193326	0.058039									0.456054	0.456054		A5	0.505449	77
A3	0.130375	0.0660734	0.199529	0.0308989									0.426876	0.426877		A6	0.505373	79
A4	0.135291	0.0907682	0.196104	0.0725009									0.494664	0.494664		A7	0.502219	97
A5	0.123508	0.0674709	0.1974	0.0588035									0.447183	0.447183		A8	0.509211	63
A6	0.127662	0.0648966	0.197307	0.0572108									0.447077	0.447077		A9	0.519601	31
A7	0.120118	0.0718104	0.195733	0.0550446									0.442706	0.442706		A10	0.652613	6
A8	0.115964	0.0649946	0.203511	0.0679139									0.452383	0.452384		A11	0.503476	91
A9	0.122152	0.0569898	0.205733	0.0818025									0.466677	0.466678		A12	0.497292	117
A10	0.139784	0.0754205	0.201381	0.223619									0.640205	0.640205		A13	0.504971	86
A11	0.128425	0.0691503	0.196289	0.050585									0.444449	0.444449		A14	0.498959	112
A12	0.131561	0.0663124	0.199252	0.0387351									0.435861	0.435861		A15	0.501384	102
A13	0.127747	0.0692299	0.196474	0.0530697									0.44652	0.446521		A16	0.494344	123
A14	0.129018	0.0718226	0.198603	0.0387351									0.43818	0.43818		A17	0.497152	118
A15	0.130036	0.0565914	0.193696	0.0612244									0.441548	0.441548		A18	0.51212	51
A16	0.117151	0.0602016	0.197955	0.0564462									0.431754	0.431754		A19	0.50275	95
A17	0.131222	0.0601648	0.196752	0.047527									0.435666	0.435666		A20	0.472631	138
A18	0.12851	0.0704619	0.200085	0.0573382									0.456395	0.456395		A21	0.512873	49
A19	0.119609	0.0654605	0.199252	0.059122									0.443443	0.443444		A22	0.52098	29
A20	0.0969757	0.0539865	0.160086	0.0902121									0.401261	0.401261		A23	0.499008	111
A21	0.138682	0.0515838	0.205177	0.0619889									0.457432	0.457433		A24	0.505133	81
A22	0.132494	0.0691074	0.202492	0.0644736									0.468567	0.468568		A25	0.490279	133
A23	0.127832	0.0566282	0.198233	0.0555543									0.438247	0.438248		A26	0.520317	30
A24	0.130036	0.0704864	0.191752	0.0544713									0.446745	0.446746		A27	0.505051	83
A25	0.136648	0.0815498	0.200363	0.00751767									0.426078	0.426078		A28	0.510072	58
A26	0.128934	0.0778906	0.199992	0.0608422									0.467659	0.467659		A29	0.505754	75
A27	0.130459	0.0725091	0.199066	0.0445964									0.446631	0.446632		A30	0.499774	106
A28	0.134698	0.0821259	0.199159	0.0375884									0.453571	0.453572		A31	0.79743	3
A29	0.125712	0.0704619	0.198233	0.0531971									0.447604	0.447605		A32	0.811849	1
A30	0.132833	0.0741456	0.200733	0.0315997									0.439311	0.439312		A33	0.503485	90
A31	0.132155	0.0708113	0.244898	0.359447									0.807311	0.807312		A34	0.532668	17
A32	0.132155	0.06098	0.200918	0.428571									0.822624	0.822625		A35	0.517643	34
A33	0.127832	0.0656014	0.199807	0.0512221									0.444462	0.444463		A36	0.490843	130
A34	0.128764	0.0852334	0.207122	0.0633905									0.48451	0.48451		A37	0.502552	96
A35	0.146566	0.0840076	0.184808	0.04861									0.463991	0.463991		A38	0.506789	73
A36	0.103672	0.0682799	0.195918	0.0589946									0.426865	0.426866		A39	0.507127	70
A37	0.131816	0.0736369	0.198789	0.0389262									0.443168	0.443168		A40	0.509577	61
A38	0.123508	0.0699103	0.19777	0.0578478									0.449037	0.449037		A41	0.501712	99
A39	0.128086	0.0774002	0.197955	0.0460617									0.449503	0.449504		A42	0.515618	38
A40	0.126306	0.0707377	0.197678	0.0581664									0.452887	0.452888		A43	0.502792	94
A41	0.128594	0.0671399	0.199252	0.0470173									0.442003	0.442004		A44	0.515465	39
A42	0.129612	0.0790981	0.193696	0.0588035									0.46121	0.46121		A45	0.52235	26
A43	0.125119	0.0623223	0.195918	0.0601414									0.443501	0.443501		A46	0.501445	101
A44	0.130798	0.0648843	0.201289	0.0640276									0.460999	0.460999		A47	0.504068	89
A45	0.125289	0.0656321	0.209251	0.0702711									0.470443	0.470443		A48	0.712269	5
A46	0.124695	0.0645043	0.19777	0.0546624									0.441632	0.441632		A49	0.325519	140
A47	0.120118	0.0761683	0.181197	0.0677865									0.445269	0.44527		A50	0.518484	33
A48	0.112065	0.0788222	0.196381	0.324661									0.71193	0.71193		A51	0.507782	66
A49	0.120626	0	0	0.0635817									0.184208	0.184208		A52	0.496803	119
A50	0.127153	0.0594844	0.211103	0.0674042									0.465145	0.465146		A53	0.506896	72
A51	0.127153	0.0675505	0.197029	0.0586761									0.450409	0.45041		A54	0.511647	55
A52	0.111132	0.0562359	0.196011	0.0718001									0.435179	0.43518		A55	0.508192	65
A53	0.126051	0.068237	0.195455	0.0594406									0.449184	0.449185		A56	0.500707	105
A54	0.129018	0.0705845	0.196381	0.0597591									0.455743	0.455744		A57	0.512978	47
A55	0.126984	0.0707377	0.199992	0.0532608									0.450975	0.450975		A58	0.52518	24
A56	0.127493	0.0558191	0.207029	0.0502665									0.440607	0.440608		A59	0.50099	104
A57	0.133935	0.0761805	0.199807	0.0476544									0.457577	0.457577		A60	0.499388	110
A58	0.134444	0.0838544	0.190456	0.0655566									0.47431	0.474311		A61	0.603881	7
A59	0.125628	0.0634133	0.195641	0.0563188									0.441	0.441001		A62	0.516667	35
A60	0.126984	0.0671031	0.198881	0.0458068									0.438775	0.438776		A63	0.52676	23
A61	0.162078	0.0693709	0.212862	0.134426									0.578738	0.578738		A64	0.495231	121
A62	0	0.0563646	0.242491	0.163796									0.462651	0.462652		A65	0.490632	132
A63	0.130714	0.0903085	0.19027	0.0651744									0.476467	0.476468		A66	0.513884	44
A64	0.12673	0.0555617	0.193233	0.0574656									0.43299	0.432991		A67	0.513165	46
A65	0.114269	0.0574434	0.191659	0.0631994									0.426571	0.426571		A68	0.528978	19
A66	0.129612	0.0659876	0.201937	0.0612881									0.458824	0.458825		A69	0.502072	98
A67	0.127662	0.0730853	0.199622	0.0574656									0.457835	0.457835		A70	0.490633	131
A68	0.132494	0.0932934	0.1949	0.0588035									0.479491	0.479491		A71	0.571646	9
A69	0.130714	0.0670295	0.197678	0.047081									0.442502	0.442502		A72	0.495761	120
A70	0.112149	0.0569408	0.199252	0.0582301									0.426572	0.426572		A73	0.533594	16
A71	0.136054	0.09835	0.231658	0.0706534									0.536715	0.536716		A74	0.508244	64
A72	0.130629	0.0668702	0.201381	0.0348489									0.433729	0.43373		A75	0.49223	127
A73	0.133511	0.0632601	0.2049	0.084096									0.485767	0.485767		A76	0.514155	42
A74	0.131392	0.075396	0.199344	0.0449149									0.451047	0.451047		A77	0.498672	114
A75	0.0993492	0.067097	0.193233	0.0691244									0.428804	0.428804		A78	0.504783	88
A76	0.109182	0.0659508	0.194807	0.0892564									0.459197	0.459197		A79	0.525057	25
A77	0.121135	0.0661408	0.197307	0.0531971									0.43778	0.43778		A80	0.511889	52
A78	0.112573	0.0620526	0.201937	0.0696977									0.44626	0.446261		A81	0.499653	108
A79	0.13029	0.0812739	0.199252	0.0633268									0.474142	0.474143		A82	0.486631	136
A80	0.130375	0.0707377	0.197307	0.0576567									0.456076	0.456077		A83	0.546938	13
A81	0.108165	0.0652766	0.197215	0.0684873									0.439144	0.439144		A84	0.509808	60
A82	0.133172	0.0716204	0.1949	0.0212788									0.420971	0.420972		A85	0.482522	137
A83	0.114014	0.075016	0.194993	0.119773									0.503796	0.503796		A86	0.514699	40
A84	0.129273	0.0621629	0.201566	0.0602051									0.453207	0.453207		A87	0.519096	32
A85	0.123424	0.0485744	0.191474	0.0517318									0.415204	0.415204		A88	0.499557	109
A86	0.13029	0.067998	0.199159	0.0624986									0.459945	0.459946		A89	0.505119	82
A87	0.0974843	0.0721659	0.189622	0.106713									0.465985	0.465986		A90	0.505006	84
A88	0.128849	0.0649456	0.198326	0.0468899									0.43901	0.43901		A91	0.505006	84
A89	0.129866	0.0696406	0.199437	0.0477818									0.446725	0.446726		A92	0.512875	48
A90	0.129866	0.0696406	0.199344	0.0477181									0.446569	0.446569		A93	0.503161	93
A91	0.129866	0.0696406	0.199344	0.0477181									0.446569	0.446569		A94	0.504787	87
A92	0.127069	0.073974	0.199437	0.0569559									0.457435	0.457436		A95	0.498086	115
A93	0.13029	0.0738269	0.194344	0.045552									0.444013	0.444014		A96	0.506917	71
A94	0.127577	0.0661776	0.201289	0.0512221									0.446266	0.446266		A97	0.492509	125
A95	0.129442	0.0659569	0.1999	0.0416657									0.436965	0.436965		A98	0.505435	78
A96	0.115455	0.0704374	0.191011	0.0723098									0.449214	0.449214		A99	0.807833	2
A97	0.128001	0.0401221	0.208511	0.05256									0.429194	0.429194		A100	0.507383	69
A98	0.119524	0.066055	0.191567	0.0700163									0.447162	0.447163		A101	0.552105	11
A99	0.120881	0.0725581	0.198603	0.426341									0.818383	0.818384		A102	0.486899	135
A100	0.128086	0.0686906	0.1974	0.0556817									0.449858	0.449858		A103	0.521338	27
A101	0.13953	0.0933486	0.205733	0.0721187									0.51073	0.51073		A104	0.521135	28
A102	0.120965	0.0427638	0.196011	0.0616067									0.421347	0.421347		A105	0.492474	126
A103	0.0969757	0.0648537	0.197585	0.109643									0.469058	0.469058		A106	0.528717	20
A104	0.13563	0.0697571	0.196752	0.0666397									0.468779	0.468779		A107	0.501553	100
A105	0.132494	0.073833	0.193511	0.0293062									0.429144	0.429145		A108	0.5106	57
A106	0.135546	0.0737595	0.206566	0.0632631									0.479134	0.479135		A109	0.544842	14
A107	0.128764	0.0638178	0.198233	0.0509673									0.441782	0.441783		A110	0.512526	50
A108	0.127069	0.071651	0.201937	0.053643									0.454299	0.4543		A111	0.51585	37
A109	0.132494	0.0875135	0.218788	0.0621801									0.500975	0.500976		A112	0.732509	4
A110	0.128679	0.0730485	0.201011	0.0542164									0.456955	0.456955		A113	0.568183	10
A111	0.124865	0.0692361	0.203974	0.0634542									0.461529	0.461529		A114	0.582076	8
A112	0.163265	0.0735327	0.20314	0.295419									0.735357	0.735358		A115	0.510061	59
A113	0.142412	0.0771489	0.214529	0.0980483									0.532138	0.532138		A116	0.503186	92
A114	0.130883	0.163265	0.196011	0.0602688									0.550428	0.550429		A117	0.513734	45
A115	0.127323	0.0647433	0.198418	0.063072									0.453557	0.453557		A118	0.527412	22
A116	0.118931	0.0661469	0.200548	0.0584212									0.444047	0.444047		A119	0.509419	62
A117	0.133342	0.0499718	0.203696	0.071609									0.458618	0.458619		A120	0.467475	139
A118	0.129866	0.075206	0.207492	0.0647921									0.477356	0.477357		A121	0.516244	36
A119	0.129103	0.0710258	0.199344	0.0531971									0.45267	0.452671		A122	0.491209	128
A120	0.127662	0.0658405	0.200455	0									0.393958	0.393958		A123	0.528708	21
A121	0.124949	0.0819359	0.196381	0.0588035									0.46207	0.462071		A124	0.514206	41
A122	0.131307	0.0362668	0.213233	0.0465713									0.427378	0.427378		A125	0.529339	18
A123	0.130375	0.0592086	0.198881	0.090658									0.479123	0.479123		A126	0.549613	12
A124	0.129103	0.0694996	0.201289	0.0593769									0.459268	0.459269		A127	0.501153	103
A125	0.122322	0.0534839	0.203326	0.100851									0.479982	0.479983		A128	0.506118	74
A126	0.131985	0.0791839	0.21601	0.0802097									0.507389	0.50739		A129	0.495145	122
A127	0.126475	0.0462207	0.201381	0.0671494									0.441227	0.441227		A130	0.505514	76
A128	0.131985	0.0757147	0.198233	0.0421754									0.448108	0.448109		A131	0.511451	56
A129	0.120202	0.0588715	0.194993	0.0588035									0.43287	0.43287		A132	0.489436	134
A130	0.124356	0.0714978	0.191659	0.0597591									0.447272	0.447273		A133	0.493842	124
A131	0.131307	0.072883	0.200826	0.0504576									0.455473	0.455474		A134	0.50528	80
A132	0.122067	0.0552736	0.161105	0.0864532									0.424899	0.424899		A135	0.507741	67
A133	0.121983	0.0578234	0.194993	0.0562551									0.431054	0.431054		A136	0.507408	68
A134	0.12834	0.0589083	0.199622	0.0600777									0.446948	0.446949		A137	0.497893	116
A135	0.120457	0.0711116	0.200363	0.0584212									0.450352	0.450353		A138	0.511794	54
A136	0.132918	0.071412	0.199437	0.0461254									0.449892	0.449892		A139	0.498851	113
A137	0.122406	0.0585773	0.194807	0.0609059									0.436697	0.436697		A140	0.514101	43
A138	0.13029	0.071412	0.198881	0.0553632									0.455946	0.455947
A139	0.122576	0.0627391	0.192956	0.0597591									0.43803	0.43803
A140	0.127238	0.0740292	0.195548	0.0623075									0.459123	0.459123
max	0.163265	0.163265	0.244898	0.428571									0.999999

## Sheet: 20_06
xij	C1	C2	C3	C4
A1	3.8	5.19	0.94	1.35
A2	0.31	5.77	0.72	0.42
A3	0.19	5.11	0.001	3.17
A4	3.85	5.76	-0.25	2.91
A5	0.94	3.54	1.01	1.06
A6	0.18	-0.61	0.42	0.12
A7	0.93	2.81	0.87	1.37
A8	4.4	13.06	1.44	0.45
A9	1.75	13.8	2.33	-0.14
A10	0.95	2.72	1.64	73.46
A11	0.36	3.59	0.32	0.98
A12	0.57	2.74	0.44	2.66
A13	0.3	-2.84	0.95	1.64
A14	0.38	-0.93	0.26	2.12
A15	0.69	-3.65	2.55	1.48
A16	0.51	1.61	0.58	0.46
A17	0.18	-6.2	0.69	1.38
A18	0.34	5.81	0.39	0.44
A19	0.63	-1.48	0.75	0.34
A20	1.89	5.99	8.08	1.75
A21	0.18	-0.43	0.43	1.39
A22	1.5	2.94	0.52	0.57
A23	0.19	-9.69	1.22	0.95
A24	0.36	2.08	1.66	1.2
A25	0.24	-4.98	0.43	8.35
A26	0.7	0.13	1.05	0.54
A27	0.16	-1.19	0.17	1.34
A28	-0.01	-23.44	0.57	2.92
A29	0.33	3.86	0.33	0.8
A30	0.18	-1.69	0.53	4.04
A31	0.57	-4.79	12.47	-9.82
A32	0.48	-2.24	1.08	1.74
A33	0.4	6.22	0.19	1.07
A34	0.3	-41.05	4.22	0.21
A35	3.04	11.72	0.72	3.39
A36	3.41	4.92	0.49	0.59
A37	0.33	3.39	0.32	2.73
A38	0.52	-10.8	1.66	0.8
A39	1	-7.6	1.32	4.05
A40	0.63	-0.39	0.56	0.51
A41	1.01	6.7	1.72	5.11
A42	0.28	-1.15	0.95	0.59
A43	0.19	-6.42	1.05	0.76
A44	1.07	8.99	1.3	1.39
A45	0.75	-3.08	2.98	0.34
A46	0.54	-6.43	1.14	0.97
A47	3.25	-11.5	10.51	6.19
A48	2.35	-4.49	2.03	-17.15
A49	0.46	-7.39	12.96	1.21
A50	-0.03	-11.57	0.29	-0.64
A51	0.48	14.82	0.84	0.37
A52	1.29	10.04	1.48	4.22
A53	1.06	6.9	1.48	0.82
A54	0.37	-0.6	0.98	0.71
A55	0.56	3.56	0.41	1.17
A56	1	-0.26	6.48	8.4
A57	0.25	0.3	0.83	1.74
A58	1.14	6.11	1.17	0.08
A59	0.96	2.97	0.32	0.6
A60	0.18	1.64	0.03	1.28
A61	2.6	0.43	0.9	0.11
A62	30.56	7.37	2.37	-1.31
A63	0.46	-7.93	1.96	0.5
A64	1.77	4.99	1.43	0.88
A65	0.6	6.25	1.7	0.06
A66	1.45	5.95	0.5	0.79
A67	0.72	3.03	0.5	0.74
A68	1.44	2.83	2.53	2.26
A69	0.28	-1.28	0.4	1.76
A70	1.39	-3.01	0.62	0.54
A71	1.27	15.97	7.44	0.84
A72	0.24	0.44	0.15	3.13
A73	-0.17	2.02	1.59	0.08
A74	0.47	-3.14	0.51	3.27
A75	-0.22	1.71	0.1	-2.08
A76	-3.35	-2.63	-0.97	-7.49
A77	0.23	2.31	0.08	0.47
A78	1.31	10.29	0.45	-0.7
A79	0.6	0.79	1.67	0.51
A80	0.61	0.48	2.27	2.41
A81	1.6	6	0.62	-0.42
A82	0.14	-9.85	2.29	4.66
A83	9.77	6.74	17.34	7.72
A84	0.41	2.08	0.87	0.39
A85	0.39	6.83	0.49	0.83
A86	0.94	7.74	0.55	0.09
A87	1.72	0.13	1.4	-3.64
A88	-0.02	0.44	0.21	1.74
A89	0.32	-3.11	0.74	2.02
A90	0.24	-3.11	0.5	1.76
A91	0.22	-3.11	0.45	1.71
A92	1.27	0.79	0.67	1.15
A93	0.14	1.15	0.93	1.68
A94	5.35	3.16	3.18	8.2
A95	0.45	-3.17	0.97	3.65
A96	1.14	-2.11	1.77	4.11
A97	0.35	-76.49	7.22	1.23
A98	0.48	3.21	3.79	0.07
A99	4.05	0.48	2.03	-13.65
A100	0.9	16.97	0.45	1.04
A101	0.17	0.29	0.37	-0.91
A102	0.51	24.11	0.62	0.23
A103	-0.67	2.24	1.77	-4.63
A104	0.05	2.41	-0.04	-0.99
A105	0.21	-1.35	0.79	4.28
A106	-0.37	-6.91	-0.55	-1.15
A107	0.31	2.95	0.49	1.03
A108	0.91	2.59	0.51	1.49
A109	0.22	-45.6	5.31	1.21
A110	0.4	0.16	0.22	0.74
A111	0.98	2.53	1.11	0.16
A112	-2.53	-0.37	-0.18	-18.59
A113	12.96	23.67	9.2	11.11
A114	1.18	-2.4	1.01	1.51
A115	0.33	0.72	0.68	-0.27
A116	0.55	3.17	-0.11	-0.01
A117	0.3	4.53	0.48	-1.16
A118	3.42	5.09	2.02	-0.04
A119	0.27	-1.55	0.28	0.86
A120	1.28	0.38	0.62	11.91
A121	0.79	-1.61	2.87	0.59
A122	0.05	-70.52	2.39	1.91
A123	2.64	-1.94	1.93	6.8
A124	0.68	5.15	0.76	0.65
A125	0.27	8.1	0.26	-4.05
A126	0.34	4.16	0.43	-1.73
A127	0.42	5.22	0.83	0.03
A128	0.4	0.84	0.46	2.56
A129	0.57	7.64	1.3	0.49
A130	1.22	8.23	2.26	0.7
A131	0.15	-1.76	0.39	1.11
A132	0.22	6.4	-0.2	-3.98
A133	0.21	-2.61	0.43	0.17
A134	0.64	10.98	0.11	-0.63
A135	0.99	1.3	1.25	0.26
A136	0.48	-0.24	0.55	2.14
A137	0.88	9.37	0.67	0.14
A138	0.33	8.09	0.33	0.51
A139	0.6	2.62	1.15	0.42
A140	0.71	-2.36	2.2	0.85
MAX	30.56	24.11	17.34	73.46
MIN	-3.35	-76.49	-0.97	-18.59
	1	1	1	1
	Normalizacija
nij	C1	C2	C3	C4
A1	0.210852	0.811928	0.104315	0.216621
A2	0.107933	0.817694	0.0922993	0.206518
A3	0.104394	0.811133	0.0530311	0.236393
A4	0.212327	0.817594	0.0393228	0.233569
A5	0.126511	0.795527	0.108138	0.213471
A6	0.104099	0.754274	0.0759148	0.203259
A7	0.126216	0.78827	0.100492	0.216839
A8	0.228546	0.890159	0.131622	0.206844
A9	0.150398	0.897515	0.180229	0.200435
A10	0.126806	0.787376	0.142545	1
A11	0.109407	0.796024	0.0704533	0.212602
A12	0.1156	0.787575	0.0770071	0.230853
A13	0.107638	0.732107	0.104861	0.219772
A14	0.109997	0.751093	0.0671764	0.224986
A15	0.119139	0.724056	0.192245	0.218034
A16	0.113831	0.776342	0.0846532	0.206953
A17	0.104099	0.698708	0.0906608	0.216947
A18	0.108817	0.818091	0.0742764	0.206735
A19	0.11737	0.745626	0.0939377	0.205649
A20	0.154527	0.819881	0.494265	0.220967
A21	0.104099	0.756064	0.076461	0.217056
A22	0.143026	0.789563	0.0813763	0.208148
A23	0.104394	0.664016	0.119607	0.212276
A24	0.109407	0.781014	0.143637	0.214992
A25	0.105868	0.710835	0.076461	0.292667
A26	0.119434	0.76163	0.110322	0.207822
A27	0.103509	0.748509	0.0622611	0.216513
A28	0.098496	0.527336	0.084107	0.233677
A29	0.108523	0.798708	0.0709995	0.210646
A30	0.104099	0.743539	0.0819224	0.245845
A31	0.1156	0.712724	0.734025	0.0952743
A32	0.112946	0.738072	0.111961	0.220858
A33	0.110587	0.822167	0.0633534	0.21358
A34	0.107638	0.352286	0.283452	0.204237
A35	0.18844	0.876839	0.0922993	0.238783
A36	0.199351	0.809245	0.0797378	0.208365
A37	0.108523	0.794036	0.0704533	0.231613
A38	0.114126	0.652982	0.143637	0.210646
A39	0.128281	0.684791	0.125068	0.245953
A40	0.11737	0.756461	0.0835609	0.207496
A41	0.128576	0.826938	0.146914	0.257469
A42	0.107048	0.748907	0.104861	0.208365
A43	0.104394	0.696521	0.110322	0.210212
A44	0.130345	0.849702	0.123976	0.217056
A45	0.120908	0.729722	0.215729	0.205649
A46	0.114715	0.696421	0.115238	0.212493
A47	0.194633	0.646024	0.62698	0.269202
A48	0.168092	0.715706	0.163845	0.0156437
A49	0.112356	0.686879	0.760786	0.2151
A50	0.0979062	0.645328	0.0688149	0.195003
A51	0.112946	0.907654	0.0988531	0.205975
A52	0.136833	0.860139	0.133807	0.2478
A53	0.13005	0.828926	0.133807	0.210864
A54	0.109702	0.754374	0.106499	0.209669
A55	0.115305	0.795726	0.0753687	0.214666
A56	0.128281	0.757753	0.406881	0.29321
A57	0.106163	0.76332	0.0983069	0.220858
A58	0.132409	0.821074	0.116876	0.202825
A59	0.127101	0.789861	0.0704533	0.208474
A60	0.104099	0.77664	0.054615	0.215861
A61	0.175464	0.764612	0.10213	0.20315
A62	1	0.833598	0.182414	0.187724
A63	0.112356	0.681511	0.160022	0.207387
A64	0.150988	0.80994	0.131076	0.211515
A65	0.116485	0.822465	0.145822	0.202607
A66	0.141551	0.819483	0.080284	0.210538
A67	0.120024	0.790457	0.080284	0.209995
A68	0.141256	0.788469	0.191152	0.226507
A69	0.107048	0.747614	0.0748225	0.221076
A70	0.139782	0.730417	0.0868378	0.207822
A71	0.136243	0.919085	0.459312	0.211081
A72	0.105868	0.764712	0.0611688	0.235959
A73	0.0937776	0.780417	0.139814	0.202825
A74	0.112651	0.729125	0.0808301	0.23748
A75	0.0923032	0.777336	0.058438	0.179359
A76	0	0.734195	0	0.120587
A77	0.105574	0.7833	0.0573457	0.207061
A78	0.137423	0.862624	0.0775532	0.194351
A79	0.116485	0.768191	0.144184	0.207496
A80	0.11678	0.765109	0.176952	0.228137
A81	0.145975	0.81998	0.0868378	0.197393
A82	0.102919	0.662425	0.178045	0.25258
A83	0.386907	0.827336	1	0.285823
A84	0.110882	0.781014	0.100492	0.206192
A85	0.110292	0.828231	0.0797378	0.210972
A86	0.126511	0.837276	0.0830147	0.202933
A87	0.149513	0.76163	0.129437	0.162412
A88	0.0982011	0.764712	0.0644457	0.220858
A89	0.108228	0.729423	0.0933916	0.2239
A90	0.105868	0.729423	0.080284	0.221076
A91	0.105279	0.729423	0.0775532	0.220532
A92	0.136243	0.768191	0.0895685	0.214449
A93	0.102919	0.771769	0.103768	0.220206
A94	0.256561	0.79175	0.226652	0.291037
A95	0.112061	0.728827	0.105953	0.241608
A96	0.132409	0.739364	0.149645	0.246605
A97	0.109112	0	0.447297	0.215318
A98	0.112946	0.792247	0.259967	0.202716
A99	0.218225	0.765109	0.163845	0.0536665
A100	0.125332	0.929026	0.0775532	0.213254
A101	0.103804	0.763221	0.0731841	0.19207
A102	0.113831	1	0.0868378	0.204454
A103	0.0790327	0.782604	0.149645	0.151657
A104	0.100265	0.784294	0.0507919	0.1912
A105	0.104984	0.746918	0.0961223	0.248452
A106	0.0878797	0.69165	0.0229383	0.189462
A107	0.107933	0.789662	0.0797378	0.213145
A108	0.125627	0.786083	0.0808301	0.218142
A109	0.105279	0.307058	0.342982	0.2151
A110	0.110587	0.761928	0.0649918	0.209995
A111	0.127691	0.785487	0.113599	0.203694
A112	0.0241817	0.75666	0.0431458	0
A113	0.480979	0.995626	0.555434	0.322651
A114	0.133589	0.736481	0.108138	0.21836
A115	0.108523	0.767495	0.0901147	0.199022
A116	0.11501	0.791849	0.0469689	0.201847
A117	0.107638	0.805368	0.0791917	0.189354
A118	0.199646	0.810934	0.163299	0.201521
A119	0.106753	0.74493	0.0682687	0.211298
A120	0.136538	0.764115	0.0868378	0.331342
A121	0.122088	0.744334	0.209721	0.208365
A122	0.100265	0.0593439	0.183506	0.222705
A123	0.176644	0.741054	0.158383	0.275828
A124	0.118844	0.811531	0.0944839	0.209017
A125	0.106753	0.840855	0.0671764	0.157958
A126	0.108817	0.80169	0.076461	0.183161
A127	0.111177	0.812227	0.0983069	0.202281
A128	0.110587	0.768688	0.0780994	0.229766
A129	0.1156	0.836282	0.123976	0.207279
A130	0.134769	0.842147	0.176406	0.20956
A131	0.103214	0.742843	0.0742764	0.214014
A132	0.105279	0.823956	0.0420535	0.158718
A133	0.104984	0.734394	0.076461	0.203802
A134	0.117664	0.869483	0.0589842	0.195111
A135	0.127986	0.77326	0.121245	0.20478
A136	0.112946	0.757952	0.0830147	0.225204
A137	0.124742	0.853479	0.0895685	0.203476
A138	0.108523	0.840755	0.0709995	0.207496
A139	0.116485	0.786382	0.115784	0.206518
A140	0.119729	0.736879	0.173129	0.21119
	0.163265	0.163265	0.244898	0.428571
vij	C1	C2	C3	C4
A1	0.0344248	0.132559	0.0255464	0.0928377
A2	0.0176216	0.133501	0.0226039	0.0885077
A3	0.0170439	0.13243	0.0129872	0.101311
A4	0.0346655	0.133485	0.00963007	0.100101
A5	0.0206549	0.129882	0.0264827	0.0914875
A6	0.0169957	0.123147	0.0185914	0.087111
A7	0.0206067	0.128697	0.0246102	0.0929308
A8	0.0373136	0.145332	0.032234	0.0886474
A9	0.0245547	0.146533	0.0441378	0.0859004
A10	0.020703	0.128551	0.034909	0.428571
A11	0.0178624	0.129963	0.0172539	0.091115
A12	0.0188735	0.128583	0.0188589	0.0989368
A13	0.0175735	0.119528	0.0256802	0.0941878
A14	0.0179587	0.122627	0.0164514	0.0964227
A15	0.0194512	0.118213	0.0470803	0.0934429
A16	0.0185846	0.126749	0.0207314	0.0886939
A17	0.0169957	0.114075	0.0222027	0.0929773
A18	0.0177661	0.133566	0.0181901	0.0886008
A19	0.0191623	0.121735	0.0230052	0.0881352
A20	0.0252288	0.133858	0.121045	0.0947
A21	0.0169957	0.123439	0.0187251	0.0930239
A22	0.0233511	0.128908	0.0199289	0.0892061
A23	0.0170439	0.108411	0.0292915	0.0909753
A24	0.0178624	0.127512	0.0351765	0.0921393
A25	0.0172846	0.116054	0.0187251	0.125429
A26	0.0194994	0.124348	0.0270177	0.0890664
A27	0.0168994	0.122205	0.0152476	0.0927911
A28	0.016081	0.0860955	0.0205976	0.100147
A29	0.0177179	0.130401	0.0173876	0.0902769
A30	0.0169957	0.121394	0.0200626	0.105362
A31	0.0188735	0.116363	0.179761	0.0408318
A32	0.0184401	0.120501	0.0274189	0.0946534
A33	0.018055	0.134231	0.0155151	0.091534
A34	0.0175735	0.057516	0.0694167	0.08753
A35	0.0307657	0.143157	0.0226039	0.102336
A36	0.0325471	0.132121	0.0195276	0.0892992
A37	0.0177179	0.129638	0.0172539	0.0992627
A38	0.0186327	0.106609	0.0351765	0.0902769
A39	0.0209438	0.111802	0.030629	0.105408
A40	0.0191623	0.123504	0.0204639	0.0889267
A41	0.0209919	0.13501	0.035979	0.110344
A42	0.0174772	0.12227	0.0256802	0.0892992
A43	0.0170439	0.113717	0.0270177	0.0900907
A44	0.0212808	0.138727	0.0303615	0.0930239
A45	0.0197401	0.119138	0.0528316	0.0881352
A46	0.018729	0.113701	0.0282215	0.0910684
A47	0.0317767	0.105473	0.153546	0.115372
A48	0.0274435	0.11685	0.0401253	0.00670442
A49	0.0183438	0.112143	0.186315	0.0921858
A50	0.0159847	0.105359	0.0168526	0.0835725
A51	0.0184401	0.148188	0.0242089	0.0882749
A52	0.02234	0.140431	0.032769	0.1062
A53	0.0212326	0.135335	0.032769	0.0903701
A54	0.0179105	0.123163	0.0260814	0.0898579
A55	0.0188253	0.129914	0.0184576	0.0919996
A56	0.0209438	0.123715	0.0996445	0.125661
A57	0.0173328	0.124623	0.0240752	0.0946534
A58	0.0216178	0.134053	0.0286227	0.0869247
A59	0.0207512	0.128957	0.0172539	0.0893458
A60	0.0169957	0.126798	0.0133751	0.0925117
A61	0.0286472	0.124834	0.0250114	0.0870644
A62	0.163265	0.136097	0.0446728	0.0804531
A63	0.0183438	0.111267	0.039189	0.0888802
A64	0.024651	0.132235	0.0321002	0.0906494
A65	0.0190179	0.13428	0.0357115	0.0868316
A66	0.0231104	0.133793	0.0196614	0.0902304
A67	0.0195957	0.129054	0.0196614	0.0899976
A68	0.0230622	0.128729	0.0468128	0.0970745
A69	0.0174772	0.122059	0.0183239	0.0947465
A70	0.0228215	0.119252	0.0212664	0.0890664
A71	0.0222437	0.150054	0.112485	0.0904632
A72	0.0172846	0.124851	0.0149801	0.101125
A73	0.0153106	0.127415	0.0342402	0.0869247
A74	0.018392	0.119041	0.0197951	0.101777
A75	0.0150699	0.126912	0.0143114	0.0768681
A76	0	0.119868	0	0.0516799
A77	0.0172365	0.127886	0.0140439	0.0887405
A78	0.0224363	0.140836	0.0189926	0.0832932
A79	0.0190179	0.125419	0.0353103	0.0889267
A80	0.019066	0.124916	0.0433353	0.0977729
A81	0.0238325	0.133874	0.0212664	0.0845968
A82	0.0168032	0.108151	0.0436028	0.108249
A83	0.0631683	0.135075	0.244898	0.122495
A84	0.0181031	0.127512	0.0246102	0.088368
A85	0.0180068	0.135221	0.0195276	0.0904166
A86	0.0206549	0.136698	0.0203301	0.0869713
A87	0.0244103	0.124348	0.031699	0.069605
A88	0.0160328	0.124851	0.0157826	0.0946534
A89	0.0176698	0.119089	0.0228714	0.0959571
A90	0.0172846	0.119089	0.0196614	0.0947465
A91	0.0171883	0.119089	0.0189926	0.0945138
A92	0.0222437	0.125419	0.0219352	0.0919065
A93	0.0168032	0.126003	0.0254127	0.0943741
A94	0.0418875	0.129265	0.0555066	0.12473
A95	0.0182957	0.118992	0.0259477	0.103546
A96	0.0216178	0.120712	0.0366478	0.105688
A97	0.0178142	0	0.109542	0.0922789
A98	0.0184401	0.129346	0.0636655	0.0868782
A99	0.0356285	0.124916	0.0401253	0.0229999
A100	0.0204623	0.151677	0.0189926	0.0913943
A101	0.0169476	0.124607	0.0179226	0.0823154
A102	0.0185846	0.163265	0.0212664	0.0876231
A103	0.0129033	0.127772	0.0366478	0.0649957
A104	0.0163698	0.128048	0.0124388	0.081943
A105	0.0171402	0.121946	0.0235402	0.106479
A106	0.0143477	0.112922	0.00561754	0.081198
A107	0.0176216	0.128924	0.0195276	0.0913478
A108	0.0205104	0.12834	0.0197951	0.0934895
A109	0.0171883	0.0501318	0.0839956	0.0921858
A110	0.018055	0.124396	0.0159164	0.0899976
A111	0.0208475	0.128243	0.0278202	0.0872972
A112	0.00394802	0.123536	0.0105663	0
A113	0.078527	0.162551	0.136025	0.138279
A114	0.0218104	0.120242	0.0264827	0.0935826
A115	0.0177179	0.125305	0.0220689	0.0852952
A116	0.0187772	0.129281	0.0115026	0.0865057
A117	0.0175735	0.131488	0.0193939	0.0811515
A118	0.0325952	0.132397	0.0399915	0.086366
A119	0.0174291	0.121621	0.0167189	0.0905563
A120	0.0222919	0.124753	0.0212664	0.142003
A121	0.0199327	0.121524	0.0513604	0.0892992
A122	0.0163698	0.00968879	0.0449403	0.0954449
A123	0.0288398	0.120988	0.0387878	0.118212
A124	0.0194031	0.132495	0.0231389	0.0895786
A125	0.0174291	0.137282	0.0164514	0.0676961
A126	0.0177661	0.130888	0.0187251	0.0784976
A127	0.0181513	0.132608	0.0240752	0.0866919
A128	0.018055	0.1255	0.0191264	0.0984712
A129	0.0188735	0.136536	0.0303615	0.0888336
A130	0.022003	0.137493	0.0432016	0.0898113
A131	0.0168513	0.12128	0.0181901	0.0917202
A132	0.0171883	0.134523	0.0102988	0.068022
A133	0.0171402	0.119901	0.0187251	0.0873437
A134	0.0192105	0.141956	0.0144451	0.0836191
A135	0.0208956	0.126246	0.0296927	0.0877628
A136	0.0184401	0.123747	0.0203301	0.0965158
A137	0.020366	0.139343	0.0219352	0.0872041
A138	0.0177179	0.137266	0.0173876	0.0889267
A139	0.0190179	0.128389	0.0283552	0.0885077
A140	0.0195475	0.120307	0.0423991	0.0905097
max=ti	0.163265	0.163265	0.244898	0.428571									0.428571
min=tai	0	0	0	0									0
d+	C1	C2	C3	C4									S+	Ki+
A1	0.394146	0.296012	0.403025	0.335733									1.42892	0.499879
A2	0.410949	0.29507	0.405967	0.340063									1.45205	0.491915
A3	0.411527	0.296141	0.415584	0.32726									1.45051	0.492436
A4	0.393905	0.295086	0.418941	0.32847									1.4364	0.497273
A5	0.407916	0.298689	0.402088	0.337084									1.44578	0.494049
A6	0.411575	0.305424	0.40998	0.34146									1.46844	0.486425
A7	0.407964	0.299874	0.403961	0.33564									1.44744	0.493482
A8	0.391257	0.283239	0.396337	0.339924									1.41076	0.506313
A9	0.404016	0.282038	0.384433	0.342671									1.41316	0.505453
A10	0.407868	0.30002	0.393662	0									1.10155	0.648436
A11	0.410709	0.298608	0.411317	0.337456									1.45809	0.489877
A12	0.409698	0.299988	0.409712	0.329634									1.44903	0.49294
A13	0.410998	0.309043	0.402891	0.334383									1.45731	0.490138
A14	0.410612	0.305944	0.41212	0.332148									1.46082	0.48896
A15	0.40912	0.310358	0.381491	0.335128									1.4361	0.497379
A16	0.409986	0.301822	0.40784	0.339877									1.45952	0.489396
A17	0.411575	0.314496	0.406368	0.335594									1.46803	0.486559
A18	0.410805	0.295005	0.410381	0.33997									1.45616	0.490526
A19	0.409409	0.306836	0.405566	0.340436									1.46225	0.488485
A20	0.403342	0.294713	0.307526	0.333871									1.33945	0.533266
A21	0.411575	0.305132	0.409846	0.335547									1.4621	0.488533
A22	0.40522	0.299663	0.408642	0.339365									1.45289	0.49163
A23	0.411527	0.32016	0.39928	0.337596									1.46856	0.486384
A24	0.410709	0.301059	0.393394	0.336432									1.44159	0.495483
A25	0.411286	0.312517	0.409846	0.303142									1.43679	0.497139
A26	0.409072	0.304223	0.401553	0.339505									1.45435	0.491136
A27	0.411672	0.306366	0.413323	0.33578									1.46714	0.486855
A28	0.41249	0.342475	0.407973	0.328424									1.49136	0.478948
A29	0.410853	0.29817	0.411183	0.338294									1.4585	0.489739
A30	0.411575	0.307177	0.408508	0.323209									1.45047	0.492451
A31	0.409698	0.312208	0.24881	0.387739									1.35845	0.525807
A32	0.410131	0.30807	0.401152	0.333918									1.45327	0.491502
A33	0.410516	0.29434	0.413056	0.337037									1.45495	0.490935
A34	0.410998	0.371055	0.359154	0.341041									1.48225	0.481893
A35	0.397805	0.285414	0.405967	0.326235									1.41542	0.504645
A36	0.396024	0.29645	0.409043	0.339272									1.44079	0.49576
A37	0.410853	0.298933	0.411317	0.329308									1.45041	0.492471
A38	0.409938	0.321962	0.393394	0.338294									1.46359	0.488037
A39	0.407627	0.316769	0.397942	0.323163									1.4455	0.494144
A40	0.409409	0.305067	0.408107	0.339644									1.46223	0.488491
A41	0.407579	0.293561	0.392592	0.318227									1.41196	0.505882
A42	0.411094	0.306301	0.402891	0.339272									1.45956	0.489385
A43	0.411527	0.314854	0.401553	0.33848									1.46641	0.487096
A44	0.40729	0.289844	0.39821	0.335547									1.43089	0.499189
A45	0.408831	0.309433	0.375739	0.340436									1.43444	0.497954
A46	0.409842	0.31487	0.40035	0.337503									1.46256	0.488379
A47	0.396794	0.323098	0.275025	0.313199									1.30812	0.546041
A48	0.401127	0.311721	0.388446	0.421867									1.52316	0.468949
A49	0.410227	0.316428	0.242256	0.336385									1.3053	0.547221
A50	0.412586	0.323212	0.411718	0.344998									1.49251	0.478578
A51	0.410131	0.280383	0.404362	0.340296									1.43517	0.4977
A52	0.406231	0.28814	0.395802	0.322371									1.41254	0.505673
A53	0.407338	0.293236	0.395802	0.338201									1.43458	0.497906
A54	0.41066	0.305408	0.40249	0.338713									1.45727	0.490152
A55	0.409746	0.298657	0.410113	0.336571									1.45509	0.490888
A56	0.407627	0.304856	0.328927	0.30291									1.34432	0.531336
A57	0.411238	0.303948	0.404496	0.333918									1.4536	0.491391
A58	0.406953	0.294518	0.399948	0.341646									1.44307	0.494977
A59	0.40782	0.299614	0.411317	0.339225									1.45798	0.489915
A60	0.411575	0.301773	0.415196	0.336059									1.4646	0.487699
A61	0.399924	0.303737	0.40356	0.341507									1.44873	0.493043
A62	0.265306	0.292474	0.383898	0.348118									1.2898	0.553797
A63	0.410227	0.317304	0.389382	0.339691									1.4566	0.490377
A64	0.40392	0.296336	0.396471	0.337922									1.43465	0.497882
A65	0.409553	0.294291	0.392859	0.341739									1.43844	0.496568
A66	0.405461	0.294778	0.40891	0.338341									1.44749	0.493465
A67	0.408975	0.299517	0.40891	0.338573									1.45598	0.490589
A68	0.405509	0.299842	0.381758	0.331497									1.41861	0.503512
A69	0.411094	0.306512	0.410247	0.333824									1.46168	0.488675
A70	0.40575	0.309319	0.407305	0.339505									1.46188	0.488608
A71	0.406327	0.278517	0.316086	0.338108									1.33904	0.533431
A72	0.411286	0.30372	0.413591	0.327446									1.45604	0.490566
A73	0.41326	0.301156	0.394331	0.341646									1.45039	0.492477
A74	0.410179	0.30953	0.408776	0.326794									1.45528	0.490823
A75	0.413501	0.301659	0.41426	0.351703									1.48112	0.482259
A76	0.428571	0.308703	0.428571	0.376891									1.54274	0.462999
A77	0.411335	0.300685	0.414527	0.33983									1.46638	0.487108
A78	0.406135	0.287735	0.409578	0.345278									1.44873	0.493044
A79	0.409553	0.303152	0.393261	0.339644									1.44561	0.494106
A80	0.409505	0.303655	0.385236	0.330798									1.42919	0.499782
A81	0.404738	0.294697	0.407305	0.343974									1.45071	0.492368
A82	0.411768	0.32042	0.384968	0.320322									1.43748	0.496901
A83	0.365403	0.293496	0.183673	0.306076									1.14865	0.621849
A84	0.410468	0.301059	0.403961	0.340203									1.45569	0.490685
A85	0.410564	0.29335	0.409043	0.338154									1.45111	0.492233
A86	0.407916	0.291873	0.408241	0.3416									1.44963	0.492736
A87	0.404161	0.304223	0.396872	0.358966									1.46422	0.487826
A88	0.412538	0.30372	0.412788	0.333918									1.46296	0.488245
A89	0.410901	0.309482	0.4057	0.332614									1.4587	0.489674
A90	0.411286	0.309482	0.40891	0.333824									1.4635	0.488066
A91	0.411383	0.309482	0.409578	0.334057									1.4645	0.487733
A92	0.406327	0.303152	0.406636	0.336665									1.45278	0.491668
A93	0.411768	0.302568	0.403158	0.334197									1.45169	0.492036
A94	0.386683	0.299306	0.373064	0.303841									1.36289	0.524094
A95	0.410275	0.309579	0.402623	0.325025									1.4475	0.49346
A96	0.406953	0.307859	0.391923	0.322883									1.42962	0.499633
A97	0.410757	0.428571	0.319029	0.336292									1.49465	0.477895
A98	0.410131	0.299225	0.364906	0.341693									1.41595	0.504455
A99	0.392943	0.303655	0.388446	0.405571									1.49061	0.479188
A100	0.408109	0.276894	0.409578	0.337177									1.43176	0.498887
A101	0.411623	0.303964	0.410648	0.346256									1.47249	0.485086
A102	0.409986	0.265306	0.407305	0.340948									1.42354	0.501765
A103	0.415668	0.300799	0.391923	0.363575									1.47197	0.485259
A104	0.412201	0.300523	0.416132	0.346628									1.47548	0.484102
A105	0.411431	0.306625	0.405031	0.322092									1.44518	0.494254
A106	0.414223	0.315649	0.422953	0.347373									1.5002	0.476127
A107	0.410949	0.299647	0.409043	0.337223									1.45686	0.49029
A108	0.408061	0.300231	0.408776	0.335082									1.45215	0.491881
A109	0.411383	0.378439	0.344575	0.336385									1.47078	0.48565
A110	0.410516	0.304175	0.412655	0.338573									1.46592	0.487261
A111	0.407724	0.300328	0.400751	0.341274									1.45008	0.492584
A112	0.424623	0.305035	0.418005	0.428571									1.57623	0.453159
A113	0.350044	0.26602	0.292546	0.290292									1.1989	0.595782
A114	0.406761	0.308329	0.402088	0.334988									1.45217	0.491875
A115	0.410853	0.303266	0.406502	0.343276									1.4639	0.487934
A116	0.409794	0.29929	0.417068	0.342065									1.46822	0.486498
A117	0.410998	0.297083	0.409177	0.34742									1.46468	0.487674
A118	0.395976	0.296174	0.388579	0.342205									1.42293	0.50198
A119	0.411142	0.30695	0.411852	0.338015									1.46796	0.486584
A120	0.406279	0.303818	0.407305	0.286568									1.40397	0.508761
A121	0.408638	0.307047	0.377211	0.339272									1.43217	0.498744
A122	0.412201	0.418882	0.383631	0.333126									1.54784	0.461472
A123	0.399731	0.307583	0.389783	0.310359									1.40746	0.507501
A124	0.409168	0.296076	0.405432	0.338992									1.44967	0.492723
A125	0.411142	0.291289	0.41212	0.360875									1.47543	0.484121
A126	0.410805	0.297683	0.409846	0.350073									1.46841	0.486435
A127	0.41042	0.295963	0.404496	0.341879									1.45276	0.491675
A128	0.410516	0.303071	0.409445	0.3301									1.45313	0.491549
A129	0.409698	0.292035	0.39821	0.339737									1.43968	0.496142
A130	0.406568	0.291078	0.385369	0.33876									1.42177	0.50239
A131	0.41172	0.307291	0.410381	0.336851									1.46624	0.487154
A132	0.411383	0.294048	0.418272	0.360549									1.48425	0.481243
A133	0.411431	0.30867	0.409846	0.341227									1.47117	0.48552
A134	0.409361	0.286615	0.414126	0.344952									1.45505	0.4909
A135	0.407675	0.302325	0.398878	0.340808									1.44969	0.492717
A136	0.410131	0.304824	0.408241	0.332055									1.45525	0.490833
A137	0.408205	0.289228	0.406636	0.341367									1.44544	0.494166
A138	0.410853	0.291305	0.411183	0.339644									1.45299	0.491598
A139	0.409553	0.300182	0.400216	0.340063									1.45001	0.492605
A140	0.409023	0.308264	0.386172	0.338061									1.44152	0.495508
min	0.265306	0.265306	0.183673	0									0.714285	1		A1	0.392624	24
RADIS	Ranking Alternatives from Average Distance from the Ideal Solution															A2	0.377075	67
d-	C1	C2	C3	C4									S-	Ki-		A3	0.378104	63
A1	0.0344248	0.132559	0.0255464	0.0928377									0.285368	0.285369		A4	0.387577	35
A2	0.0176216	0.133501	0.0226039	0.0885077									0.262234	0.262234		A5	0.381278	48
A3	0.0170439	0.13243	0.0129872	0.101311									0.263772	0.263772		A6	0.366135	121
A4	0.0346655	0.133485	0.00963007	0.100101									0.277881	0.277881		A7	0.380163	49
A5	0.0206549	0.129882	0.0264827	0.0914875									0.268507	0.268507		A8	0.40492	14
A6	0.0169957	0.123147	0.0185914	0.087111									0.245845	0.245845		A9	0.40329	17
A7	0.0206067	0.128697	0.0246102	0.0929308									0.266845	0.266845		A10	0.630585	1
A8	0.0373136	0.145332	0.032234	0.0886474									0.303527	0.303527		A11	0.373036	92
A9	0.0245547	0.146533	0.0441378	0.0859004									0.301126	0.301126		A12	0.379096	54
A10	0.020703	0.128551	0.034909	0.428571									0.612734	0.612735		A13	0.373553	90
A11	0.0178624	0.129963	0.0172539	0.091115									0.256194	0.256194		A14	0.37121	97
A12	0.0188735	0.128583	0.0188589	0.0989368									0.265253	0.265253		A15	0.387784	34
A13	0.0175735	0.119528	0.0256802	0.0941878									0.256969	0.256969		A16	0.372078	95
A14	0.0179587	0.122627	0.0164514	0.0964227									0.25346	0.25346		A17	0.366405	118
A15	0.0194512	0.118213	0.0470803	0.0934429									0.278187	0.278188		A18	0.374325	86
A16	0.0185846	0.126749	0.0207314	0.0886939									0.254759	0.25476		A19	0.370261	102
A17	0.0169957	0.114075	0.0222027	0.0929773									0.24625	0.24625		A20	0.454049	8
A18	0.0177661	0.133566	0.0181901	0.0886008									0.258123	0.258123		A21	0.370359	100
A19	0.0191623	0.121735	0.0230052	0.0881352									0.252037	0.252038		A22	0.376512	72
A20	0.0252288	0.133858	0.121045	0.0947									0.374831	0.374832		A23	0.366053	122
A21	0.0169957	0.123439	0.0187251	0.0930239									0.252183	0.252184		A24	0.384087	42
A22	0.0233511	0.128908	0.0199289	0.0892061									0.261394	0.261394		A25	0.387316	36
A23	0.0170439	0.108411	0.0292915	0.0909753									0.245721	0.245721		A26	0.375534	77
A24	0.0178624	0.127512	0.0351765	0.0921393									0.27269	0.272691		A27	0.366999	116
A25	0.0172846	0.116054	0.0187251	0.125429									0.277493	0.277493		A28	0.350935	133
A26	0.0194994	0.124348	0.0270177	0.0890664									0.259931	0.259931		A29	0.372762	93
A27	0.0168994	0.122205	0.0152476	0.0927911									0.247143	0.247144		A30	0.378133	62
A28	0.016081	0.0860955	0.0205976	0.100147									0.222921	0.222922		A31	0.440818	10
A29	0.0177179	0.130401	0.0173876	0.0902769									0.255784	0.255784		A32	0.376258	75
A30	0.0169957	0.121394	0.0200626	0.105362									0.263814	0.263814		A33	0.375135	78
A31	0.0188735	0.116363	0.179761	0.0408318									0.355829	0.35583		A34	0.356965	130
A32	0.0184401	0.120501	0.0274189	0.0946534									0.261014	0.261014		A35	0.401754	18
A33	0.018055	0.134231	0.0155151	0.091534									0.259335	0.259335		A36	0.384628	40
A34	0.0175735	0.057516	0.0694167	0.08753									0.232036	0.232036		A37	0.378172	61
A35	0.0307657	0.143157	0.0226039	0.102336									0.298862	0.298863		A38	0.369366	106
A36	0.0325471	0.132121	0.0195276	0.0892992									0.273495	0.273496		A39	0.381464	46
A37	0.0177179	0.129638	0.0172539	0.0992627									0.263873	0.263873		A40	0.370274	101
A38	0.0186327	0.106609	0.0351765	0.0902769									0.250695	0.250696		A41	0.404104	15
A39	0.0209438	0.111802	0.030629	0.105408									0.268784	0.268784		A42	0.372056	96
A40	0.0191623	0.123504	0.0204639	0.0889267									0.252057	0.252057		A43	0.367483	115
A41	0.0209919	0.13501	0.035979	0.110344									0.302325	0.302325		A44	0.391291	27
A42	0.0174772	0.12227	0.0256802	0.0892992									0.254727	0.254727		A45	0.3889	30
A43	0.0170439	0.113717	0.0270177	0.0900907									0.24787	0.24787		A46	0.37005	103
A44	0.0212808	0.138727	0.0303615	0.0930239									0.283393	0.283393		A47	0.476105	6
A45	0.0197401	0.119138	0.0528316	0.0881352									0.279845	0.279845		A48	0.330036	137
A46	0.018729	0.113701	0.0282215	0.0910684									0.25172	0.25172		A49	0.478105	5
A47	0.0317767	0.105473	0.153546	0.115372									0.406168	0.406168		A50	0.350174	134
A48	0.0274435	0.11685	0.0401253	0.00670442									0.191123	0.191123		A51	0.388406	33
A49	0.0183438	0.112143	0.186315	0.0921858									0.408988	0.408988		A52	0.403706	16
A50	0.0159847	0.105359	0.0168526	0.0835725									0.221769	0.221769		A53	0.388806	31
A51	0.0184401	0.148188	0.0242089	0.0882749									0.279112	0.279112		A54	0.373583	89
A52	0.02234	0.140431	0.032769	0.1062									0.30174	0.30174		A55	0.375043	80
A53	0.0212326	0.135335	0.032769	0.0903701									0.279706	0.279707		A56	0.45065	9
A54	0.0179105	0.123163	0.0260814	0.0898579									0.257013	0.257013		A57	0.376038	76
A55	0.0188253	0.129914	0.0184576	0.0919996									0.259197	0.259197		A58	0.383098	43
A56	0.0209438	0.123715	0.0996445	0.125661									0.369964	0.369965		A59	0.373111	91
A57	0.0173328	0.124623	0.0240752	0.0946534									0.260685	0.260685		A60	0.36869	110
A58	0.0216178	0.134053	0.0286227	0.0869247									0.271218	0.271218		A61	0.379301	53
A59	0.0207512	0.128957	0.0172539	0.0893458									0.256307	0.256308		A62	0.489143	4
A60	0.0169957	0.126798	0.0133751	0.0925117									0.249681	0.249681		A63	0.374029	87
A61	0.0286472	0.124834	0.0250114	0.0870644									0.265557	0.265558		A64	0.388759	32
A62	0.163265	0.136097	0.0446728	0.0804531									0.424488	0.424489		A65	0.386205	38
A63	0.0183438	0.111267	0.039189	0.0888802									0.25768	0.25768		A66	0.38013	50
A64	0.024651	0.132235	0.0321002	0.0906494									0.279636	0.279636		A67	0.374449	84
A65	0.0190179	0.13428	0.0357115	0.0868316									0.275841	0.275841		A68	0.399596	20
A66	0.0231104	0.133793	0.0196614	0.0902304									0.266795	0.266795		A69	0.370641	98
A67	0.0195957	0.129054	0.0196614	0.0899976									0.258309	0.258309		A70	0.370507	99
A68	0.0230622	0.128729	0.0468128	0.0970745									0.295679	0.295679		A71	0.454339	7
A69	0.0174772	0.122059	0.0183239	0.0947465									0.252607	0.252607		A72	0.374403	85
A70	0.0228215	0.119252	0.0212664	0.0890664									0.252406	0.252406		A73	0.378184	60
A71	0.0222437	0.150054	0.112485	0.0904632									0.375246	0.375246		A74	0.374914	82
A72	0.0172846	0.124851	0.0149801	0.101125									0.25824	0.258241		A75	0.35771	129
A73	0.0153106	0.127415	0.0342402	0.0869247									0.26389	0.263891		A76	0.317274	138
A74	0.018392	0.119041	0.0197951	0.101777									0.259005	0.259005		A77	0.367508	114
A75	0.0150699	0.126912	0.0143114	0.0768681									0.233161	0.233161		A78	0.379301	52
A76	0	0.119868	0	0.0516799									0.171548	0.171548		A79	0.38139	47
A77	0.0172365	0.127886	0.0140439	0.0887405									0.247906	0.247907		A80	0.392436	25
A78	0.0224363	0.140836	0.0189926	0.0832932									0.265558	0.265559		A81	0.377969	64
A79	0.0190179	0.125419	0.0353103	0.0889267									0.268674	0.268674		A82	0.386853	37
A80	0.019066	0.124916	0.0433353	0.0977729									0.28509	0.28509		A83	0.593743	2
A81	0.0238325	0.133874	0.0212664	0.0845968									0.26357	0.26357		A84	0.374639	83
A82	0.0168032	0.108151	0.0436028	0.108249									0.276805	0.276806		A85	0.377703	65
A83	0.0631683	0.135075	0.244898	0.122495									0.565637	0.565637		A86	0.378695	55
A84	0.0181031	0.127512	0.0246102	0.088368									0.258594	0.258594		A87	0.368944	108
A85	0.0180068	0.135221	0.0195276	0.0904166									0.263172	0.263172		A88	0.369782	104
A86	0.0206549	0.136698	0.0203301	0.0869713									0.264654	0.264654		A89	0.372631	94
A87	0.0244103	0.124348	0.031699	0.069605									0.250062	0.250062		A90	0.369424	105
A88	0.0160328	0.124851	0.0157826	0.0946534									0.25132	0.25132		A91	0.368759	109
A89	0.0176698	0.119089	0.0228714	0.0959571									0.255588	0.255588		A92	0.376586	71
A90	0.0172846	0.119089	0.0196614	0.0947465									0.250782	0.250782		A93	0.377315	66
A91	0.0171883	0.119089	0.0189926	0.0945138									0.249784	0.249784		A94	0.437742	11
A92	0.0222437	0.125419	0.0219352	0.0919065									0.261504	0.261504		A95	0.380121	51
A93	0.0168032	0.126003	0.0254127	0.0943741									0.262593	0.262593		A96	0.39215	26
A94	0.0418875	0.129265	0.0555066	0.12473									0.351389	0.35139		A97	0.348765	135
A95	0.0182957	0.118992	0.0259477	0.103546									0.266781	0.266782		A98	0.401393	19
A96	0.0216178	0.120712	0.0366478	0.105688									0.284666	0.284666		A99	0.351429	132
A97	0.0178142	0	0.109542	0.0922789									0.219635	0.219635		A100	0.390707	28
A98	0.0184401	0.129346	0.0636655	0.0868782									0.29833	0.29833		A101	0.36344	126
A99	0.0356285	0.124916	0.0401253	0.0229999									0.223669	0.223669		A102	0.396252	23
A100	0.0204623	0.151677	0.0189926	0.0913943									0.282527	0.282527		A103	0.363789	125
A101	0.0169476	0.124607	0.0179226	0.0823154									0.241793	0.241793		A104	0.361451	128
A102	0.0185846	0.163265	0.0212664	0.0876231									0.290739	0.290739		A105	0.38168	44
A103	0.0129033	0.127772	0.0366478	0.0649957									0.242319	0.242319		A106	0.345106	136
A104	0.0163698	0.128048	0.0124388	0.081943									0.238799	0.2388		A107	0.373856	88
A105	0.0171402	0.121946	0.0235402	0.106479									0.269105	0.269106		A108	0.377008	68
A106	0.0143477	0.112922	0.00561754	0.081198									0.214085	0.214086		A109	0.364576	123
A107	0.0176216	0.128924	0.0195276	0.0913478									0.257421	0.257421		A110	0.367813	112
A108	0.0205104	0.12834	0.0197951	0.0934895									0.262135	0.262135		A111	0.378396	59
A109	0.0171883	0.0501318	0.0839956	0.0921858									0.243502	0.243502		A112	0.295605	140
A110	0.018055	0.124396	0.0159164	0.0899976									0.248365	0.248365		A113	0.555582	3
A111	0.0208475	0.128243	0.0278202	0.0872972									0.264207	0.264208		A114	0.376996	69
A112	0.00394802	0.123536	0.0105663	0									0.13805	0.138051		A115	0.369161	107
A113	0.078527	0.162551	0.136025	0.138279									0.515381	0.515382		A116	0.366283	119
A114	0.0218104	0.120242	0.0264827	0.0935826									0.262117	0.262118		A117	0.368641	111
A115	0.0177179	0.125305	0.0220689	0.0852952									0.250387	0.250387		A118	0.396665	22
A116	0.0187772	0.129281	0.0115026	0.0865057									0.246067	0.246067		A119	0.366455	117
A117	0.0175735	0.131488	0.0193939	0.0811515									0.249607	0.249607		A120	0.409538	12
A118	0.0325952	0.132397	0.0399915	0.086366									0.29135	0.29135		A121	0.39043	29
A119	0.0174291	0.121621	0.0167189	0.0905563									0.246325	0.246326		A122	0.313958	139
A120	0.0222919	0.124753	0.0212664	0.142003									0.310315	0.310315		A123	0.407164	13
A121	0.0199327	0.121524	0.0513604	0.0892992									0.282116	0.282116		A124	0.378669	56
A122	0.0163698	0.00968879	0.0449403	0.0954449									0.166444	0.166444		A125	0.36149	127
A123	0.0288398	0.120988	0.0387878	0.118212									0.306828	0.306828		A126	0.366156	120
A124	0.0194031	0.132495	0.0231389	0.0895786									0.264615	0.264615		A127	0.376601	70
A125	0.0174291	0.137282	0.0164514	0.0676961									0.238859	0.238859		A128	0.376351	74
A126	0.0177661	0.130888	0.0187251	0.0784976									0.245877	0.245877		A129	0.385373	39
A127	0.0181513	0.132608	0.0240752	0.0866919									0.261527	0.261527		A130	0.397449	21
A128	0.018055	0.1255	0.0191264	0.0984712									0.261152	0.261153		A131	0.367598	113
A129	0.0188735	0.136536	0.0303615	0.0888336									0.274604	0.274604		A132	0.355638	131
A130	0.022003	0.137493	0.0432016	0.0898113									0.292509	0.292509		A133	0.364315	124
A131	0.0168513	0.12128	0.0181901	0.0917202									0.248042	0.248042		A134	0.375065	79
A132	0.0171883	0.134523	0.0102988	0.068022									0.230032	0.230033		A135	0.378657	57
A133	0.0171402	0.119901	0.0187251	0.0873437									0.24311	0.24311		A136	0.374933	81
A134	0.0192105	0.141956	0.0144451	0.0836191									0.259231	0.259231		A137	0.381507	45
A135	0.0208956	0.126246	0.0296927	0.0877628									0.264597	0.264598		A138	0.376448	73
A136	0.0184401	0.123747	0.0203301	0.0965158									0.259033	0.259033		A139	0.378438	58
A137	0.020366	0.139343	0.0219352	0.0872041									0.268848	0.268849		A140	0.384135	41
A138	0.0177179	0.137266	0.0173876	0.0889267									0.261298	0.261298
A139	0.0190179	0.128389	0.0283552	0.0885077									0.264269	0.26427
A140	0.0195475	0.120307	0.0423991	0.0905097									0.272763	0.272763
max	0.163265	0.163265	0.244898	0.428571									0.999999

## Sheet: 20_09
xij	C1	C2	C3	C4
A1	11.49	3.93	2.7	3.03
A2	0.3	0.03	0.97	0.05
A3	0.24	7.5	0.07	0.89
A4	1.49	2.09	0.71	-0.7
A5	0.46	5.71	-0.15	-0.5
A6	0.34	8.15	-0.2	-0.15
A7	1.86	6.16	1.54	0.77
A8	0.73	10.59	0.14	-0.35
A9	0.12	12.03	-0.47	-1.37
A10	2.39	21.37	0.52	-28.61
A11	0.17	7.23	0.07	0.39
A12	0.73	7.81	0.18	1
A13	0.12	-0.81	0.17	-0.27
A14	0.49	-0.47	0.44	1.45
A15	0.69	-10.23	4.54	1.35
A16	0.44	4.18	-0.13	-0.03
A17	-0.05	-24.07	0.38	0.13
A18	0.65	1.51	0.83	0.34
A19	0.28	-5.19	0.02	-0.12
A20	17.39	13.9	20.21	6.82
A21	2.22	6.78	0.03	-0.55
A22	-1.26	6.05	-0.19	-0.74
A23	0.25	-1.41	0.49	0.15
A24	0.31	15.23	-0.83	-0.27
A25	0.81	4.81	0.68	4.52
A26	0.76	17.68	0.66	0.06
A27	0.11	-2.08	0.1	0.35
A28	-0.18	-88	0.9	1.01
A29	0.62	9.46	0.5	0.51
A30	1.16	10.36	1.34	2.39
A31	6.44	22.27	35.19	-26.85
A32	0.59	-15.25	1.53	1.65
A33	0.39	9.61	-0.22	-0.01
A34	0.31	-21.55	2.68	-0.31
A35	0.52	6.68	0.11	-0.35
A36	-0.21	8.36	1.06	0.82
A37	0.29	6.77	0.37	0.98
A38	0.66	-18.17	4.06	0.45
A39	0.89	-1.85	1.15	0.34
A40	0.54	6.37	0.82	0.49
A41	1.29	7.39	1.71	1.8
A42	0.22	-2.12	0.4	-0.1
A43	0.62	5.43	0.62	-0.22
A44	0.35	10.41	-0.48	-0.97
A45	1.51	12.61	4.41	0.36
A46	0.38	7.71	0.49	0.3
A47	2.34	4.8	5.54	-0.19
A48	2.06	0.14	1.56	-11.8
A49	0.11	9.33	-6.53	-0.91
A50	0.22	-23.81	3.39	0.29
A51	0.63	14.24	0.57	0.08
A52	0.59	13.31	-0.07	-2.27
A53	1.58	9.73	1.44	0.42
A54	0.45	5.52	1.15	0.17
A55	0.68	7.6	0.21	0.18
A56	-0.09	-46.62	1.37	-4.92
A57	0.06	-5.06	0.59	0.42
A58	0.35	12.03	-0.1	-0.55
A59	1.11	4.81	0.39	0.23
A60	0.23	1.25	0.001	0.29
A61	1.12	0.51	0.89	0.48
A62	19.24	11.6	19.83	16.23
A63	0.4	13.42	0.51	-0.5
A64	2.61	4.6	3.71	1.63
A65	0.62	25.59	0.43	-0.39
A66	0.25	9.99	0.68	0.57
A67	0.71	11.25	0.03	-0.16
A68	0.2	0.4	0.35	-0.76
A69	0.19	-1.17	0.39	0.47
A70	0.38	10.06	-0.16	-0.24
A71	0.41	12.55	2.72	-0.53
A72	0.32	0.77	0.23	1.19
A73	-0.24	6.4	-1.06	-2.43
A74	0.84	-0.92	0.84	1.93
A75	2.04	1.44	-0.16	-1.15
A76	7.01	-2.16	3.66	8.63
A77	-0.02	1.4	-0.14	-0.21
A78	5.01	12.39	4.26	2.58
A79	0.87	3.18	2.42	0.2
A80	0.21	1.41	0.2	-1.15
A81	4.23	7.8	1.15	0.44
A82	-0.08	-16.43	-2.57	0.21
A83	87.19	0.73	68.3	56.47
A84	0.41	7.46	0.71	0.2
A85	0.14	0.65	-0.2	-0.09
A86	0.57	0.7	1.79	1.05
A87	7.99	6.45	3.71	2.5
A88	0.24	0.35	-0.18	-0.36
A89	0.31	-3.99	0.65	0.51
A90	0.17	-3.99	0.21	0.32
A91	0.14	-3.99	0.09	0.25
A92	0.08	1.26	0.04	-0.34
A93	0.36	10	0.76	0.56
A94	-1.47	1.93	-0.68	-3.44
A95	0.74	-3.72	1.76	1.93
A96	0.35	2.39	-0.05	-3.48
A97	0.12	-23.55	36.24	-0.03
A98	3.81	6.6	31.39	6.96
A99	14.88	-1.3	8.5	26.5
A100	1.06	6.13	0.35	0.24
A101	1.61	-1.29	2.99	0.8
A102	0.08	15.06	-1.49	-0.72
A103	0.87	7.61	0.14	-1.93
A104	1.02	4.61	1.05	0.76
A105	0.09	4.3	-0.09	0.06
A106	3.14	7.41	2.27	3.89
A107	0.09	5.87	-0.12	0.06
A108	0.51	2.99	0.39	0.28
A109	0.36	10.64	2.66	0.001
A110	0.28	0.51	0.09	0.19
A111	1.05	3.08	2.57	0.51
A112	-6.34	0.65	0.02	-19.97
A113	1.04	7.9	2.46	-2.31
A114	0.53	1.74	0.99	-0.16
A115	0.49	-0.4	1.4	0.29
A116	0.76	13.31	1.26	0.28
A117	0.12	-9.34	2.27	1
A118	-1.21	-0.44	2.85	0.11
A119	0.41	-0.4	0.76	0.63
A120	4.6	0.48	1.53	9.02
A121	0.37	2.95	-0.23	-0.24
A122	0.21	109.51	-2.93	0.32
A123	3.81	-0.14	3.93	6.19
A124	-0.03	1.87	0.27	-0.07
A125	1.08	15.84	-0.09	-1.41
A126	0.37	3.52	-0.47	-0.83
A127	0.22	9.12	0.33	-0.59
A128	0.38	1.2	0.21	0.53
A129	0.11	14.35	-0.27	-0.48
A130	0.47	15.83	0.13	-0.21
A131	0.26	2.63	0.65	0.84
A132	-0.63	12.2	-0.45	-1.45
A133	0.32	-5.24	-0.15	-0.01
A134	0.1	6.21	-0.21	-0.15
A135	0.27	3.88	-0.06	-0.02
A136	0.27	1.3	0.03	0.28
A137	0.2	13.69	0.001	-0.25
A138	0.23	6.7	-0.05	0.02
A139	0.44	13.67	-0.28	-0.46
A140	0.27	7.16	-0.81	-0.73
MAX	87.19	109.51	68.3	56.47
MIN	-6.34	-88	-6.53	-28.61
	1	1	1	1
	Normalizacija
nij	C1	C2	C3	C4
A1	0.190634	0.465445	0.123346	0.371885
A2	0.0709933	0.445699	0.100227	0.336859
A3	0.0703518	0.48352	0.0881999	0.346732
A4	0.0837165	0.456129	0.0967526	0.328044
A5	0.0727039	0.474457	0.0852599	0.330395
A6	0.0714209	0.486811	0.0845917	0.334509
A7	0.0876724	0.476735	0.107844	0.345322
A8	0.0755907	0.499165	0.0891354	0.332158
A9	0.0690687	0.506455	0.0809836	0.320169
A10	0.093339	0.553744	0.0942136	0
A11	0.0696033	0.482153	0.0881999	0.340856
A12	0.0755907	0.485089	0.0896699	0.348025
A13	0.0690687	0.441446	0.0895363	0.333098
A14	0.0730247	0.443167	0.0931445	0.353315
A15	0.075163	0.393752	0.147935	0.352139
A16	0.0724901	0.466711	0.0855272	0.335919
A17	0.0672511	0.32368	0.0923426	0.3378
A18	0.0747354	0.453192	0.0983563	0.340268
A19	0.0707794	0.41927	0.0875317	0.334861
A20	0.253715	0.515923	0.357343	0.416432
A21	0.0915214	0.479874	0.0876654	0.329807
A22	0.0543141	0.476178	0.0847254	0.327574
A23	0.0704587	0.438408	0.0938126	0.338035
A24	0.0711002	0.522657	0.0761727	0.333098
A25	0.0764461	0.4699	0.0963517	0.389398
A26	0.0759115	0.535062	0.0960845	0.336977
A27	0.0689618	0.435016	0.0886008	0.340386
A28	0.0658612	0	0.0992917	0.348143
A29	0.0744146	0.493443	0.0939463	0.342266
A30	0.0801882	0.498	0.105172	0.364363
A31	0.136641	0.558301	0.55753	0.0206864
A32	0.0740939	0.368336	0.107711	0.355665
A33	0.0719555	0.494203	0.0843245	0.336154
A34	0.0711002	0.336439	0.123079	0.332628
A35	0.0733455	0.479368	0.0887345	0.332158
A36	0.0655405	0.487874	0.10143	0.34591
A37	0.0708863	0.479824	0.092209	0.34779
A38	0.0748423	0.353552	0.141521	0.341561
A39	0.0773014	0.43618	0.102633	0.340268
A40	0.0735593	0.477799	0.0982226	0.342031
A41	0.0815781	0.482963	0.110116	0.357428
A42	0.0701379	0.434813	0.0926099	0.335096
A43	0.0744146	0.473039	0.0955499	0.333686
A44	0.0715279	0.498253	0.0808499	0.324871
A45	0.0839303	0.509392	0.146198	0.340503
A46	0.0718486	0.484583	0.0938126	0.339798
A47	0.0928044	0.46985	0.161299	0.334039
A48	0.0898108	0.446256	0.108112	0.197579
A49	0.0689618	0.492785	0	0.325576
A50	0.0701379	0.324996	0.132567	0.33968
A51	0.0745215	0.517645	0.0948817	0.337212
A52	0.0740939	0.512936	0.086329	0.309591
A53	0.0846787	0.49481	0.106508	0.341208
A54	0.072597	0.473495	0.102633	0.33827
A55	0.0750561	0.484026	0.0900708	0.338387
A56	0.0668235	0.209508	0.105573	0.278444
A57	0.0684272	0.419928	0.095149	0.341208
A58	0.0715279	0.506455	0.0859281	0.329807
A59	0.0796536	0.4699	0.0924763	0.338975
A60	0.0702448	0.451876	0.0872778	0.33968
A61	0.0797605	0.448129	0.0991581	0.341913
A62	0.273495	0.504278	0.352265	0.527033
A63	0.0720624	0.513493	0.0940799	0.330395
A64	0.0956912	0.468837	0.136844	0.35543
A65	0.0744146	0.57511	0.0930108	0.331688
A66	0.0704587	0.496127	0.0963517	0.342971
A67	0.0753769	0.502506	0.0876654	0.334391
A68	0.0699241	0.447572	0.0919417	0.327339
A69	0.0698172	0.439623	0.0924763	0.341796
A70	0.0718486	0.496481	0.0851263	0.333451
A71	0.0721694	0.509088	0.123614	0.330042
A72	0.0712071	0.449446	0.0903381	0.350259
A73	0.0652197	0.47795	0.073099	0.30771
A74	0.0767668	0.440889	0.0984899	0.358956
A75	0.0895969	0.452838	0.0851263	0.322755
A76	0.142735	0.434611	0.136175	0.437706
A77	0.0675719	0.452635	0.0853936	0.333803
A78	0.121351	0.508278	0.144194	0.366596
A79	0.0770876	0.461648	0.119604	0.338622
A80	0.070031	0.452686	0.0899372	0.322755
A81	0.113012	0.485039	0.102633	0.341443
A82	0.0669304	0.362361	0.05292	0.33874
A83	1	0.449243	1	1
A84	0.0721694	0.483317	0.0967526	0.338622
A85	0.0692826	0.448838	0.0845917	0.335214
A86	0.07388	0.449091	0.111185	0.348613
A87	0.153213	0.478204	0.136844	0.365656
A88	0.0703518	0.447319	0.084859	0.33204
A89	0.0711002	0.425346	0.0959508	0.342266
A90	0.0696033	0.425346	0.0900708	0.340033
A91	0.0692826	0.425346	0.0884672	0.33921
A92	0.0686411	0.451926	0.087799	0.332276
A93	0.0716348	0.496177	0.0974208	0.342854
A94	0.0520689	0.455319	0.0781772	0.295839
A95	0.0756976	0.426713	0.110784	0.358956
A96	0.0715279	0.457648	0.0865963	0.295369
A97	0.0690687	0.326313	0.571562	0.335919
A98	0.108521	0.478963	0.506749	0.418077
A99	0.226879	0.438965	0.200855	0.647743
A100	0.079119	0.476583	0.0919417	0.339093
A101	0.0849995	0.439016	0.127222	0.345675
A102	0.0686411	0.521796	0.0673527	0.327809
A103	0.0770876	0.484077	0.0891354	0.313587
A104	0.0786913	0.468888	0.101296	0.345205
A105	0.068748	0.467318	0.0860617	0.336977
A106	0.101358	0.483064	0.1176	0.381993
A107	0.068748	0.475267	0.0856608	0.336977
A108	0.0732385	0.460686	0.0924763	0.339563
A109	0.0716348	0.499418	0.122812	0.336283
A110	0.0707794	0.448129	0.0884672	0.338505
A111	0.0790121	0.461141	0.121609	0.342266
A112	0	0.448838	0.0875317	0.101551
A113	0.0789052	0.485545	0.120139	0.309121
A114	0.0734524	0.454357	0.100494	0.334391
A115	0.0730247	0.443522	0.105974	0.33968
A116	0.0759115	0.512936	0.104103	0.339563
A117	0.0690687	0.398258	0.1176	0.348025
A118	0.0548487	0.443319	0.125351	0.337565
A119	0.0721694	0.443522	0.0974208	0.343677
A120	0.116968	0.447977	0.107711	0.44229
A121	0.0717417	0.460483	0.0841908	0.333451
A122	0.070031	1	0.048109	0.340033
A123	0.108521	0.444838	0.139784	0.409027
A124	0.067465	0.455015	0.0908726	0.335449
A125	0.0793328	0.525746	0.0860617	0.319699
A126	0.0717417	0.463369	0.0809836	0.326516
A127	0.0701379	0.491722	0.0916745	0.329337
A128	0.0718486	0.451623	0.0900708	0.342501
A129	0.0689618	0.518202	0.0836563	0.33063
A130	0.0728109	0.525695	0.0890017	0.333803
A131	0.0705656	0.458863	0.0959508	0.346145
A132	0.0610499	0.507316	0.0812508	0.319229
A133	0.0712071	0.419017	0.0852599	0.336154
A134	0.0688549	0.476989	0.0844581	0.334509
A135	0.0706725	0.465192	0.0864626	0.336037
A136	0.0706725	0.452129	0.0876654	0.339563
A137	0.0699241	0.51486	0.0872778	0.333333
A138	0.0702448	0.479469	0.0865963	0.336507
A139	0.0724901	0.514759	0.0835227	0.330865
A140	0.0706725	0.481798	0.0764399	0.327692
	0.163265	0.163265	0.244898	0.428571
vij	C1	C2	C3	C4
A1	0.0311239	0.0759908	0.0302073	0.159379
A2	0.0115907	0.072767	0.0245454	0.144368
A3	0.011486	0.0789419	0.0216	0.148599
A4	0.013668	0.0744699	0.0236945	0.14059
A5	0.01187	0.0774622	0.02088	0.141598
A6	0.0116605	0.0794792	0.0207163	0.143361
A7	0.0143138	0.0778342	0.0264109	0.147995
A8	0.0123413	0.0814961	0.0218291	0.142353
A9	0.0112765	0.0826864	0.0198327	0.137215
A10	0.015239	0.090407	0.0230727	0
A11	0.0113638	0.0787187	0.0216	0.146081
A12	0.0123413	0.0791981	0.02196	0.149154
A13	0.0112765	0.0720727	0.0219273	0.142756
A14	0.0119224	0.0723537	0.0228109	0.15142
A15	0.0122715	0.064286	0.0362291	0.150917
A16	0.0118351	0.0761975	0.0209454	0.143965
A17	0.0109798	0.0528456	0.0226145	0.144771
A18	0.0122017	0.0739904	0.0240873	0.145829
A19	0.0115558	0.0684521	0.0214363	0.143512
A20	0.0414228	0.0842322	0.0875127	0.178471
A21	0.0149422	0.0783467	0.0214691	0.141346
A22	0.0088676	0.0777433	0.0207491	0.140389
A23	0.0115034	0.0715767	0.0229745	0.144872
A24	0.0116082	0.0853316	0.0186545	0.142756
A25	0.012481	0.0767183	0.0235963	0.166885
A26	0.0123937	0.0873568	0.0235309	0.144419
A27	0.0112591	0.0710229	0.0216982	0.145879
A28	0.0107528	0	0.0243163	0.149204
A29	0.0121493	0.080562	0.0230073	0.146685
A30	0.0130919	0.081306	0.0257563	0.156155
A31	0.0223086	0.091151	0.136538	0.0088656
A32	0.0120969	0.0601363	0.0263782	0.152428
A33	0.0117478	0.080686	0.0206509	0.144066
A34	0.0116082	0.0549287	0.0301418	0.142555
A35	0.0119747	0.078264	0.0217309	0.142353
A36	0.0107005	0.0796528	0.02484	0.148247
A37	0.0115733	0.0783384	0.0225818	0.149053
A38	0.0122191	0.0577226	0.0346582	0.146383
A39	0.0126206	0.071213	0.0251345	0.145829
A40	0.0120097	0.0780078	0.0240545	0.146585
A41	0.0133188	0.0788509	0.0269673	0.153183
A42	0.0114511	0.0709898	0.02268	0.143613
A43	0.0121493	0.0772308	0.0234	0.143008
A44	0.011678	0.0813473	0.0198	0.13923
A45	0.0137029	0.0831659	0.0358036	0.14593
A46	0.0117304	0.0791155	0.0229745	0.145627
A47	0.0151517	0.07671	0.0395018	0.143159
A48	0.014663	0.072858	0.0264763	0.0846765
A49	0.0112591	0.0804546	0	0.139532
A50	0.0114511	0.0530605	0.0324654	0.145577
A51	0.0121668	0.0845133	0.0232363	0.144519
A52	0.0120969	0.0837445	0.0211418	0.132682
A53	0.0138251	0.0807852	0.0260836	0.146232
A54	0.0118526	0.0773052	0.0251345	0.144973
A55	0.012254	0.0790245	0.0220582	0.145023
A56	0.0109099	0.0342054	0.0258545	0.119333
A57	0.0111718	0.0685596	0.0233018	0.146232
A58	0.011678	0.0826864	0.0210436	0.141346
A59	0.0130046	0.0767183	0.0226473	0.145275
A60	0.0114685	0.0737755	0.0213742	0.145577
A61	0.0130221	0.0731638	0.0242836	0.146534
A62	0.0446522	0.082331	0.086269	0.225871
A63	0.0117653	0.0838354	0.02304	0.141598
A64	0.015623	0.0765447	0.0335127	0.152327
A65	0.0121493	0.0938954	0.0227782	0.142152
A66	0.0115034	0.0810001	0.0235963	0.146988
A67	0.0123064	0.0820417	0.0214691	0.14331
A68	0.0114162	0.0730729	0.0225163	0.140288
A69	0.0113987	0.0717751	0.0226473	0.146484
A70	0.0117304	0.081058	0.0208473	0.142907
A71	0.0117827	0.0831163	0.0302727	0.141447
A72	0.0116256	0.0733787	0.0221236	0.150111
A73	0.0106481	0.0780326	0.0179018	0.131876
A74	0.0125333	0.0719818	0.02412	0.153838
A75	0.014628	0.0739326	0.0208473	0.138323
A76	0.0233036	0.0709567	0.0333491	0.187588
A77	0.0110321	0.0738995	0.0209127	0.143058
A78	0.0198124	0.082984	0.0353127	0.157112
A79	0.0125857	0.0753709	0.0292909	0.145124
A80	0.0114336	0.0739078	0.0220254	0.138323
A81	0.0184509	0.0791898	0.0251345	0.146333
A82	0.0109274	0.0591609	0.01296	0.145174
A83	0.163265	0.0733457	0.244898	0.428571
A84	0.0117827	0.0789088	0.0236945	0.145124
A85	0.0113114	0.0732795	0.0207163	0.143663
A86	0.012062	0.0733209	0.0272291	0.149405
A87	0.0250143	0.0780739	0.0335127	0.156709
A88	0.011486	0.0730316	0.0207818	0.142303
A89	0.0116082	0.069444	0.0234982	0.146685
A90	0.0113638	0.069444	0.0220582	0.145728
A91	0.0113114	0.069444	0.0216654	0.145376
A92	0.0112067	0.0737838	0.0215018	0.142404
A93	0.0116955	0.0810084	0.0238582	0.146937
A94	0.00850102	0.0743376	0.0191454	0.126788
A95	0.0123588	0.0696672	0.0271309	0.153838
A96	0.011678	0.0747179	0.0212073	0.126587
A97	0.0112765	0.0532754	0.139974	0.143965
A98	0.0177177	0.0781979	0.124102	0.179176
A99	0.0370414	0.0716676	0.0491891	0.277604
A100	0.0129174	0.0778094	0.0225163	0.145325
A101	0.0138774	0.0716759	0.0311563	0.148146
A102	0.0112067	0.0851911	0.0164945	0.140489
A103	0.0125857	0.0790328	0.0218291	0.134394
A104	0.0128475	0.0765529	0.0248073	0.147945
A105	0.0112241	0.0762967	0.0210763	0.144419
A106	0.0165482	0.0788675	0.0288	0.163711
A107	0.0112241	0.0775945	0.0209782	0.144419
A108	0.0119573	0.0752138	0.0226473	0.145527
A109	0.0116955	0.0815374	0.0300763	0.144121
A110	0.0115558	0.0731638	0.0216654	0.145073
A111	0.0128999	0.0752882	0.0297818	0.146685
A112	0	0.0732795	0.0214363	0.043522
A113	0.0128825	0.0792725	0.0294218	0.13248
A114	0.0119922	0.0741806	0.0246109	0.14331
A115	0.0119224	0.0724116	0.0259527	0.145577
A116	0.0123937	0.0837445	0.0254945	0.145527
A117	0.0112765	0.0650216	0.0288	0.149154
A118	0.00895487	0.0723785	0.0306982	0.14467
A119	0.0117827	0.0724116	0.0238582	0.14729
A120	0.0190968	0.073139	0.0263782	0.189553
A121	0.0117129	0.0751808	0.0206182	0.142907
A122	0.0114336	0.163265	0.0117818	0.145728
A123	0.0177177	0.0726265	0.0342327	0.175297
A124	0.0110147	0.074288	0.0222545	0.143764
A125	0.0129523	0.0858358	0.0210763	0.137014
A126	0.0117129	0.0756519	0.0198327	0.139935
A127	0.0114511	0.080281	0.0224509	0.141144
A128	0.0117304	0.0737342	0.0220582	0.146786
A129	0.0112591	0.0846042	0.0204873	0.141698
A130	0.0118875	0.0858276	0.0217963	0.143058
A131	0.0115209	0.0749162	0.0234982	0.148348
A132	0.00996732	0.082827	0.0198982	0.136812
A133	0.0116256	0.0684108	0.02088	0.144066
A134	0.0112416	0.0778755	0.0206836	0.143361
A135	0.0115383	0.0759495	0.0211745	0.144016
A136	0.0115383	0.0738168	0.0214691	0.145527
A137	0.0114162	0.0840586	0.0213742	0.142857
A138	0.0114685	0.0782806	0.0212073	0.144217
A139	0.0118351	0.0840421	0.0204545	0.141799
A140	0.0115383	0.0786608	0.01872	0.140439
max=ti	0.163265	0.163265	0.244898	0.428571									0.428571
min=tai	0	0	0	0									0
d+	C1	C2	C3	C4									S+	Ki+
A1	0.397447	0.35258	0.398364	0.269192									1.41758	0.503875
A2	0.41698	0.355804	0.404026	0.284203									1.46101	0.488897
A3	0.417085	0.349629	0.406971	0.279972									1.45366	0.491371
A4	0.414903	0.354101	0.404876	0.287981									1.46186	0.488613
A5	0.416701	0.351109	0.407691	0.286973									1.46247	0.488409
A6	0.41691	0.349092	0.407855	0.28521									1.45907	0.489549
A7	0.414257	0.350737	0.40216	0.280576									1.44773	0.493383
A8	0.41623	0.347075	0.406742	0.286218									1.45626	0.490491
A9	0.417294	0.345885	0.408738	0.291356									1.46327	0.488142
A10	0.413332	0.338164	0.405498	0.428571									1.58557	0.450492
A11	0.417207	0.349852	0.406971	0.28249									1.45652	0.490405
A12	0.41623	0.349373	0.406611	0.279417									1.45163	0.492057
A13	0.417294	0.356498	0.406644	0.285815									1.46625	0.48715
A14	0.416649	0.356217	0.40576	0.277151									1.45578	0.490656
A15	0.4163	0.364285	0.392342	0.277654									1.45058	0.492413
A16	0.416736	0.352374	0.407626	0.284606									1.46134	0.488787
A17	0.417591	0.375725	0.405956	0.2838									1.48307	0.481625
A18	0.416369	0.354581	0.404484	0.282742									1.45818	0.489848
A19	0.417015	0.360119	0.407135	0.285059									1.46933	0.48613
A20	0.387148	0.344339	0.341058	0.2501									1.32265	0.540043
A21	0.413629	0.350224	0.407102	0.287225									1.45818	0.489847
A22	0.419703	0.350828	0.407822	0.288182									1.46654	0.487056
A23	0.417068	0.356994	0.405596	0.283699									1.46336	0.488114
A24	0.416963	0.343239	0.409916	0.285815									1.45593	0.490603
A25	0.41609	0.351853	0.404975	0.261686									1.4346	0.497897
A26	0.416177	0.341214	0.40504	0.284152									1.44658	0.493774
A27	0.417312	0.357548	0.406873	0.282692									1.46442	0.487758
A28	0.417818	0.428571	0.404255	0.279367									1.53001	0.46685
A29	0.416422	0.348009	0.405564	0.281886									1.45188	0.491972
A30	0.415479	0.347265	0.402815	0.272416									1.43797	0.49673
A31	0.406262	0.33742	0.292033	0.419705									1.45542	0.490776
A32	0.416474	0.368435	0.402193	0.276143									1.46324	0.488151
A33	0.416823	0.347885	0.40792	0.284505									1.45713	0.490199
A34	0.416963	0.373642	0.398429	0.286016									1.47505	0.484244
A35	0.416596	0.350307	0.40684	0.286218									1.45996	0.489249
A36	0.417871	0.348918	0.403731	0.280324									1.45084	0.492324
A37	0.416998	0.350233	0.405989	0.279518									1.45274	0.491682
A38	0.416352	0.370848	0.393913	0.282188									1.4633	0.488133
A39	0.41595	0.357358	0.403436	0.282742									1.45949	0.489408
A40	0.416561	0.350563	0.404516	0.281986									1.45363	0.491381
A41	0.415252	0.34972	0.401604	0.275388									1.44196	0.495356
A42	0.41712	0.357581	0.405891	0.284958									1.46555	0.487383
A43	0.416422	0.35134	0.405171	0.285563									1.4585	0.489741
A44	0.416893	0.347224	0.408771	0.289341									1.46223	0.488491
A45	0.414868	0.345405	0.392767	0.282641									1.43568	0.497523
A46	0.416841	0.349456	0.405596	0.282944									1.45484	0.490973
A47	0.413419	0.351861	0.389069	0.285412									1.43976	0.496114
A48	0.413908	0.355713	0.402095	0.343894									1.51561	0.471285
A49	0.417312	0.348116	0.428571	0.289039									1.48304	0.481636
A50	0.41712	0.37551	0.396106	0.282994									1.47173	0.485337
A51	0.416404	0.344058	0.405335	0.284052									1.44985	0.492662
A52	0.416474	0.344826	0.407429	0.295889									1.46462	0.487693
A53	0.414746	0.347786	0.402487	0.282339									1.44736	0.49351
A54	0.416718	0.351266	0.403436	0.283598									1.45502	0.490911
A55	0.416317	0.349546	0.406513	0.283548									1.45592	0.490606
A56	0.417661	0.394366	0.402716	0.309238									1.52398	0.468697
A57	0.417399	0.360011	0.405269	0.282339									1.46502	0.48756
A58	0.416893	0.345885	0.407527	0.287225									1.45753	0.490065
A59	0.415566	0.351853	0.405924	0.283296									1.45664	0.490365
A60	0.417102	0.354795	0.407197	0.282994									1.46209	0.488537
A61	0.415549	0.355407	0.404287	0.282037									1.45728	0.490149
A62	0.383919	0.34624	0.342302	0.2027									1.27516	0.560153
A63	0.416806	0.344736	0.405531	0.286973									1.45405	0.49124
A64	0.412948	0.352026	0.395058	0.276244									1.43628	0.497317
A65	0.416422	0.334676	0.405793	0.286419									1.44331	0.494894
A66	0.417068	0.347571	0.404975	0.281583									1.4512	0.492204
A67	0.416265	0.346529	0.407102	0.285261									1.45516	0.490865
A68	0.417155	0.355498	0.406055	0.288283									1.46699	0.486905
A69	0.417172	0.356796	0.405924	0.282087									1.46198	0.488574
A70	0.416841	0.347513	0.407724	0.285664									1.45774	0.489994
A71	0.416788	0.345455	0.398298	0.287124									1.44767	0.493405
A72	0.416945	0.355192	0.406447	0.27846									1.45705	0.490228
A73	0.417923	0.350538	0.410669	0.296695									1.47583	0.48399
A74	0.416038	0.356589	0.404451	0.274733									1.45181	0.491996
A75	0.413943	0.354638	0.407724	0.290248									1.46655	0.48705
A76	0.405267	0.357614	0.395222	0.240983									1.39909	0.510537
A77	0.417539	0.354671	0.407658	0.285513									1.46538	0.48744
A78	0.408759	0.345587	0.393258	0.271459									1.41906	0.50335
A79	0.415985	0.3532	0.39928	0.283447									1.45191	0.491961
A80	0.417137	0.354663	0.406546	0.290248									1.46859	0.486373
A81	0.41012	0.349381	0.403436	0.282238									1.44518	0.494255
A82	0.417644	0.36941	0.415611	0.283397									1.48606	0.480656
A83	0.265306	0.355225	0.183673	0									0.804204	0.888188
A84	0.416788	0.349662	0.404876	0.283447									1.45477	0.490994
A85	0.41726	0.355291	0.407855	0.284908									1.46531	0.487462
A86	0.416509	0.35525	0.401342	0.279166									1.45227	0.491842
A87	0.403557	0.350497	0.395058	0.271862									1.42097	0.502673
A88	0.417085	0.355539	0.407789	0.286268									1.46668	0.487007
A89	0.416963	0.359127	0.405073	0.281886									1.46305	0.488217
A90	0.417207	0.359127	0.406513	0.282843									1.46569	0.487337
A91	0.41726	0.359127	0.406906	0.283195									1.46649	0.487072
A92	0.417364	0.354787	0.407069	0.286167									1.46539	0.487437
A93	0.416876	0.347563	0.404713	0.281634									1.45078	0.492344
A94	0.42007	0.354233	0.409426	0.301783									1.48551	0.480834
A95	0.416212	0.358904	0.40144	0.274733									1.45129	0.492173
A96	0.416893	0.353853	0.407364	0.301984									1.48009	0.482594
A97	0.417294	0.375296	0.288597	0.284606									1.36579	0.522982
A98	0.410853	0.350373	0.304469	0.249395									1.31509	0.543145
A99	0.39153	0.356903	0.379382	0.150967									1.27878	0.558567
A100	0.415654	0.350762	0.406055	0.283246									1.45572	0.490676
A101	0.414694	0.356895	0.397415	0.280425									1.44943	0.492805
A102	0.417364	0.34338	0.412076	0.288082									1.4609	0.488934
A103	0.415985	0.349538	0.406742	0.294177									1.46644	0.487087
A104	0.415723	0.352018	0.403764	0.280626									1.45213	0.491887
A105	0.417347	0.352274	0.407495	0.284152									1.46127	0.488812
A106	0.412023	0.349704	0.399771	0.26486									1.42636	0.500776
A107	0.417347	0.350977	0.407593	0.284152									1.46007	0.489213
A108	0.416614	0.353357	0.405924	0.283044									1.45894	0.489592
A109	0.416876	0.347034	0.398495	0.28445									1.44685	0.493682
A110	0.417015	0.355407	0.406906	0.283498									1.46283	0.488291
A111	0.415671	0.353283	0.398789	0.281886									1.44963	0.492737
A112	0.428571	0.355291	0.407135	0.385049									1.57605	0.453213
A113	0.415689	0.349298	0.399149	0.296091									1.46023	0.48916
A114	0.416579	0.35439	0.40396	0.285261									1.46019	0.489173
A115	0.416649	0.356159	0.402618	0.282994									1.45842	0.489766
A116	0.416177	0.344826	0.403076	0.283044									1.44712	0.493589
A117	0.417294	0.363549	0.399771	0.279417									1.46003	0.489225
A118	0.419616	0.356192	0.397873	0.283901									1.45758	0.490048
A119	0.416788	0.356159	0.404713	0.281281									1.45894	0.489591
A120	0.409474	0.355432	0.402193	0.239018									1.40612	0.507984
A121	0.416858	0.35339	0.407953	0.285664									1.46386	0.487945
A122	0.417137	0.265306	0.416789	0.282843									1.38208	0.516821
A123	0.410853	0.355944	0.394338	0.253274									1.41441	0.505006
A124	0.417556	0.354283	0.406316	0.284807									1.46296	0.488245
A125	0.415619	0.342735	0.407495	0.291557									1.45741	0.490107
A126	0.416858	0.352919	0.408738	0.288636									1.46715	0.486852
A127	0.41712	0.34829	0.40612	0.287427									1.45896	0.489586
A128	0.416841	0.354837	0.406513	0.281785									1.45998	0.489245
A129	0.417312	0.343967	0.408084	0.286873									1.45624	0.490501
A130	0.416684	0.342743	0.406775	0.285513									1.45171	0.492029
A131	0.41705	0.353655	0.405073	0.280223									1.456	0.49058
A132	0.418604	0.345744	0.408673	0.291759									1.46478	0.48764
A133	0.416945	0.36016	0.407691	0.284505									1.4693	0.486139
A134	0.417329	0.350695	0.407887	0.28521									1.46112	0.48886
A135	0.417033	0.352621	0.407396	0.284555									1.46161	0.488699
A136	0.417033	0.354754	0.407102	0.283044									1.46193	0.488589
A137	0.417155	0.344512	0.407197	0.285714									1.45458	0.49106
A138	0.417102	0.35029	0.407364	0.284354									1.45911	0.489535
A139	0.416736	0.344529	0.408116	0.286772									1.45615	0.490529
A140	0.417033	0.34991	0.409851	0.288132									1.46493	0.487591
min	0.265306	0.265306	0.183673	0									0.714285	1		A1	0.400288	11
RADIS	Ranking Alternatives from Average Distance from the Ideal Solution															A2	0.371084	88
d-	C1	C2	C3	C4									S-	Ki-		A3	0.375999	46
A1	0.0311239	0.0759908	0.0302073	0.159379									0.296701	0.296702		A4	0.370518	93
A2	0.0115907	0.072767	0.0245454	0.144368									0.253271	0.253272		A5	0.370109	98
A3	0.011486	0.0789419	0.0216	0.148599									0.260627	0.260628		A6	0.372383	78
A4	0.013668	0.0744699	0.0236945	0.14059									0.252423	0.252423		A7	0.379968	28
A5	0.01187	0.0774622	0.02088	0.141598									0.25181	0.25181		A8	0.374256	61
A6	0.0116605	0.0794792	0.0207163	0.143361									0.255217	0.255217		A9	0.369577	103
A7	0.0143138	0.0778342	0.0264109	0.147995									0.266554	0.266554		A10	0.289606	140
A8	0.0123413	0.0814961	0.0218291	0.142353									0.25802	0.25802		A11	0.374084	62
A9	0.0112765	0.0826864	0.0198327	0.137215									0.251011	0.251011		A12	0.377355	37
A10	0.015239	0.090407	0.0230727	0									0.128719	0.128719		A13	0.367592	117
A11	0.0113638	0.0787187	0.0216	0.146081									0.257763	0.257764		A14	0.374582	55
A12	0.0123413	0.0791981	0.02196	0.149154									0.262653	0.262653		A15	0.378058	32
A13	0.0112765	0.0720727	0.0219273	0.142756									0.248033	0.248033		A16	0.370865	91
A14	0.0119224	0.0723537	0.0228109	0.15142									0.258507	0.258508		A17	0.356418	133
A15	0.0122715	0.064286	0.0362291	0.150917									0.263703	0.263703		A18	0.372978	71
A16	0.0118351	0.0761975	0.0209454	0.143965									0.252943	0.252943		A19	0.365543	127
A17	0.0109798	0.0528456	0.0226145	0.144771									0.231211	0.231211		A20	0.465841	5
A18	0.0122017	0.0739904	0.0240873	0.145829									0.256108	0.256109		A21	0.372975	72
A19	0.0115558	0.0684521	0.0214363	0.143512									0.244956	0.244956		A22	0.367403	120
A20	0.0414228	0.0842322	0.0875127	0.178471									0.391638	0.391639		A23	0.36952	105
A21	0.0149422	0.0783467	0.0214691	0.141346									0.256104	0.256104		A24	0.374477	57
A22	0.0088676	0.0777433	0.0207491	0.140389									0.247749	0.247749		A25	0.388789	15
A23	0.0115034	0.0715767	0.0229745	0.144872									0.250927	0.250927		A26	0.380737	23
A24	0.0116082	0.0853316	0.0186545	0.142756									0.258351	0.258351		A27	0.368809	107
A25	0.012481	0.0767183	0.0235963	0.166885									0.27968	0.279681		A28	0.325561	138
A26	0.0123937	0.0873568	0.0235309	0.144419									0.2677	0.2677		A29	0.377188	40
A27	0.0112591	0.0710229	0.0216982	0.145879									0.249859	0.24986		A30	0.38652	18
A28	0.0107528	0	0.0243163	0.149204									0.184273	0.184273		A31	0.37482	53
A29	0.0121493	0.080562	0.0230073	0.146685									0.262404	0.262404		A32	0.369595	102
A30	0.0130919	0.081306	0.0257563	0.156155									0.27631	0.27631		A33	0.373675	65
A31	0.0223086	0.091151	0.136538	0.0088656									0.258863	0.258864		A34	0.361739	129
A32	0.0120969	0.0601363	0.0263782	0.152428									0.251039	0.25104		A35	0.371786	81
A33	0.0117478	0.080686	0.0206509	0.144066									0.257151	0.257151		A36	0.377882	34
A34	0.0116082	0.0549287	0.0301418	0.142555									0.239233	0.239234		A37	0.376614	44
A35	0.0119747	0.078264	0.0217309	0.142353									0.254323	0.254323		A38	0.369558	104
A36	0.0107005	0.0796528	0.02484	0.148247									0.26344	0.26344		A39	0.372103	80
A37	0.0115733	0.0783384	0.0225818	0.149053									0.261546	0.261547		A40	0.376019	45
A38	0.0122191	0.0577226	0.0346582	0.146383									0.250983	0.250983		A41	0.383838	20
A39	0.0126206	0.071213	0.0251345	0.145829									0.254797	0.254797		A42	0.368059	115
A40	0.0120097	0.0780078	0.0240545	0.146585									0.260657	0.260657		A43	0.372765	74
A41	0.0133188	0.0788509	0.0269673	0.153183									0.27232	0.272321		A44	0.370273	97
A42	0.0114511	0.0709898	0.02268	0.143613									0.248733	0.248734		A45	0.388063	16
A43	0.0121493	0.0772308	0.0234	0.143008									0.255788	0.255788		A46	0.37521	50
A44	0.011678	0.0813473	0.0198	0.13923									0.252055	0.252056		A47	0.385318	19
A45	0.0137029	0.0831659	0.0358036	0.14593									0.278602	0.278602		A48	0.33498	136
A46	0.0117304	0.0791155	0.0229745	0.145627									0.259448	0.259448		A49	0.356441	132
A47	0.0151517	0.07671	0.0395018	0.143159									0.274523	0.274523		A50	0.363946	128
A48	0.014663	0.072858	0.0264763	0.0846765									0.198674	0.198674		A51	0.378549	31
A49	0.0112591	0.0804546	0	0.139532									0.231246	0.231246		A52	0.368679	108
A50	0.0114511	0.0530605	0.0324654	0.145577									0.242554	0.242554		A53	0.380218	26
A51	0.0121668	0.0845133	0.0232363	0.144519									0.264436	0.264436		A54	0.375088	51
A52	0.0120969	0.0837445	0.0211418	0.132682									0.249665	0.249665		A55	0.374483	56
A53	0.0138251	0.0807852	0.0260836	0.146232									0.266926	0.266926		A56	0.3295	137
A54	0.0118526	0.0773052	0.0251345	0.144973									0.259265	0.259265		A57	0.368413	111
A55	0.012254	0.0790245	0.0220582	0.145023									0.25836	0.25836		A58	0.37341	68
A56	0.0109099	0.0342054	0.0258545	0.119333									0.190303	0.190303		A59	0.374005	63
A57	0.0111718	0.0685596	0.0233018	0.146232									0.249265	0.249265		A60	0.370366	96
A58	0.011678	0.0826864	0.0210436	0.141346									0.256754	0.256754		A61	0.373577	66
A59	0.0130046	0.0767183	0.0226473	0.145275									0.257645	0.257645		A62	0.499638	2
A60	0.0114685	0.0737755	0.0213742	0.145577									0.252195	0.252196		A63	0.375739	47
A61	0.0130221	0.0731638	0.0242836	0.146534									0.257004	0.257004		A64	0.387662	17
A62	0.0446522	0.082331	0.086269	0.225871									0.439123	0.439124		A65	0.382934	21
A63	0.0117653	0.0838354	0.02304	0.141598									0.260238	0.260239		A66	0.377646	35
A64	0.015623	0.0765447	0.0335127	0.152327									0.278007	0.278008		A67	0.374996	52
A65	0.0121493	0.0938954	0.0227782	0.142152									0.270975	0.270975		A68	0.367099	123
A66	0.0115034	0.0810001	0.0235963	0.146988									0.263087	0.263088		A69	0.37044	95
A67	0.0123064	0.0820417	0.0214691	0.14331									0.259128	0.259128		A70	0.373269	70
A68	0.0114162	0.0730729	0.0225163	0.140288									0.247293	0.247294		A71	0.380012	27
A69	0.0113987	0.0717751	0.0226473	0.146484									0.252305	0.252305		A72	0.373734	64
A70	0.0117304	0.081058	0.0208473	0.142907									0.256543	0.256543		A73	0.361224	130
A71	0.0117827	0.0831163	0.0302727	0.141447									0.266618	0.266619		A74	0.377235	39
A72	0.0116256	0.0733787	0.0221236	0.150111									0.257239	0.257239		A75	0.367391	121
A73	0.0106481	0.0780326	0.0179018	0.131876									0.238458	0.238458		A76	0.412867	8
A74	0.0125333	0.0719818	0.02412	0.153838									0.262473	0.262474		A77	0.368171	113
A75	0.014628	0.0739326	0.0208473	0.138323									0.247731	0.247732		A78	0.399286	12
A76	0.0233036	0.0709567	0.0333491	0.187588									0.315197	0.315198		A79	0.377166	41
A77	0.0110321	0.0738995	0.0209127	0.143058									0.248903	0.248903		A80	0.366032	125
A78	0.0198124	0.082984	0.0353127	0.157112									0.295222	0.295222		A81	0.381681	22
A79	0.0125857	0.0753709	0.0292909	0.145124									0.262371	0.262372		A82	0.35444	135
A80	0.0114336	0.0739078	0.0220254	0.138323									0.24569	0.245691		A83	0.899135	1
A81	0.0184509	0.0791898	0.0251345	0.146333									0.269108	0.269108		A84	0.375252	49
A82	0.0109274	0.0591609	0.01296	0.145174									0.228222	0.228223		A85	0.368216	112
A83	0.163265	0.0733457	0.244898	0.428571									0.91008	0.910081		A86	0.37693	43
A84	0.0117827	0.0789088	0.0236945	0.145124									0.25951	0.25951		A87	0.397992	13
A85	0.0113114	0.0732795	0.0207163	0.143663									0.24897	0.248971		A88	0.367305	122
A86	0.012062	0.0733209	0.0272291	0.149405									0.262017	0.262018		A89	0.369726	101
A87	0.0250143	0.0780739	0.0335127	0.156709									0.29331	0.293311		A90	0.367966	116
A88	0.011486	0.0730316	0.0207818	0.142303									0.247602	0.247602		A91	0.367434	119
A89	0.0116082	0.069444	0.0234982	0.146685									0.251236	0.251236		A92	0.368167	114
A90	0.0113638	0.069444	0.0220582	0.145728									0.248594	0.248594		A93	0.377922	33
A91	0.0113114	0.069444	0.0216654	0.145376									0.247797	0.247797		A94	0.354803	134
A92	0.0112067	0.0737838	0.0215018	0.142404									0.248896	0.248896		A95	0.377584	36
A93	0.0116955	0.0810084	0.0238582	0.146937									0.263499	0.263499		A96	0.358392	131
A94	0.00850102	0.0743376	0.0191454	0.126788									0.228772	0.228772		A97	0.435737	6
A95	0.0123588	0.0696672	0.0271309	0.153838									0.262995	0.262995		A98	0.471169	4
A96	0.011678	0.0747179	0.0212073	0.126587									0.23419	0.23419		A99	0.497035	3
A97	0.0112765	0.0532754	0.139974	0.143965									0.348492	0.348492		A100	0.374622	54
A98	0.0177177	0.0781979	0.124102	0.179176									0.399193	0.399193		A101	0.37883	29
A99	0.0370414	0.0716676	0.0491891	0.277604									0.435502	0.435503		A102	0.371158	87
A100	0.0129174	0.0778094	0.0225163	0.145325									0.258568	0.258569		A103	0.367465	118
A101	0.0138774	0.0716759	0.0311563	0.148146									0.264856	0.264856		A104	0.37702	42
A102	0.0112067	0.0851911	0.0164945	0.140489									0.253382	0.253382		A105	0.370914	90
A103	0.0125857	0.0790328	0.0218291	0.134394									0.247842	0.247842		A106	0.394351	14
A104	0.0128475	0.0765529	0.0248073	0.147945									0.262152	0.262153		A107	0.371714	84
A105	0.0112241	0.0762967	0.0210763	0.144419									0.253016	0.253016		A108	0.372469	75
A106	0.0165482	0.0788675	0.0288	0.163711									0.287927	0.287927		A109	0.380556	24
A107	0.0112241	0.0775945	0.0209782	0.144419									0.254215	0.254216		A110	0.369875	99
A108	0.0119573	0.0752138	0.0226473	0.145527									0.255345	0.255345		A111	0.378696	30
A109	0.0116955	0.0815374	0.0300763	0.144121									0.267431	0.267431		A112	0.295726	139
A110	0.0115558	0.0731638	0.0216654	0.145073									0.251458	0.251459		A113	0.371609	86
A111	0.0128999	0.0752882	0.0297818	0.146685									0.264655	0.264656		A114	0.371633	85
A112	0	0.0732795	0.0214363	0.043522									0.138238	0.138238		A115	0.372815	73
A113	0.0128825	0.0792725	0.0294218	0.13248									0.254057	0.254057		A116	0.380374	25
A114	0.0119922	0.0741806	0.0246109	0.14331									0.254094	0.254094		A117	0.371739	83
A115	0.0119224	0.0724116	0.0259527	0.145577									0.255864	0.255864		A118	0.373375	69
A116	0.0123937	0.0837445	0.0254945	0.145527									0.267159	0.26716		A119	0.372467	76
A117	0.0112765	0.0650216	0.0288	0.149154									0.254252	0.254252		A120	0.408075	9
A118	0.00895487	0.0723785	0.0306982	0.14467									0.256702	0.256702		A121	0.369182	106
A119	0.0117827	0.0724116	0.0238582	0.14729									0.255342	0.255343		A122	0.424515	7
A120	0.0190968	0.073139	0.0263782	0.189553									0.308166	0.308167		A123	0.40244	10
A121	0.0117129	0.0751808	0.0206182	0.142907									0.250419	0.250419		A124	0.369783	100
A122	0.0114336	0.163265	0.0117818	0.145728									0.332209	0.332209		A125	0.373493	67
A123	0.0177177	0.0726265	0.0342327	0.175297									0.299874	0.299874		A126	0.366992	124
A124	0.0110147	0.074288	0.0222545	0.143764									0.251321	0.251321		A127	0.372457	77
A125	0.0129523	0.0858358	0.0210763	0.137014									0.256878	0.256878		A128	0.371777	82
A126	0.0117129	0.0756519	0.0198327	0.139935									0.247133	0.247133		A129	0.374275	60
A127	0.0114511	0.080281	0.0224509	0.141144									0.255327	0.255328		A130	0.377299	38
A128	0.0117304	0.0737342	0.0220582	0.146786									0.254309	0.254309		A131	0.374432	58
A129	0.0112591	0.0846042	0.0204873	0.141698									0.258049	0.258049		A132	0.368572	109
A130	0.0118875	0.0858276	0.0217963	0.143058									0.26257	0.26257		A133	0.365561	126
A131	0.0115209	0.0749162	0.0234982	0.148348									0.258283	0.258283		A134	0.371011	89
A132	0.00996732	0.082827	0.0198982	0.136812									0.249505	0.249505		A135	0.370688	92
A133	0.0116256	0.0684108	0.02088	0.144066									0.244982	0.244983		A136	0.37047	94
A134	0.0112416	0.0778755	0.0206836	0.143361									0.253161	0.253162		A137	0.375383	48
A135	0.0115383	0.0759495	0.0211745	0.144016									0.252678	0.252678		A138	0.372354	79
A136	0.0115383	0.0738168	0.0214691	0.145527									0.252351	0.252351		A139	0.37433	59
A137	0.0114162	0.0840586	0.0213742	0.142857									0.259706	0.259706		A140	0.368475	110
A138	0.0114685	0.0782806	0.0212073	0.144217									0.255173	0.255174
A139	0.0118351	0.0840421	0.0204545	0.141799									0.258131	0.258131
A140	0.0115383	0.0786608	0.01872	0.140439									0.249358	0.249359
max	0.163265	0.163265	0.244898	0.428571									0.999999

## Sheet: 20_12
xij	C1	C2	C3	C4
A1	-6.73	7.89	-1.42	-2.78
A2	0.42	-4.43	2.45	0.79
A3	0.19	1	0.13	0.46
A4	0.56	3.12	0.6	-0.36
A5	0.42	3.04	0.33	0.01
A6	1	12.12	1.08	0.64
A7	5.98	3.43	5.23	2.5
A8	0.36	2.99	-0.23	-0.54
A9	1.35	8.46	-0.41	-0.67
A10	-1.94	3.66	0.16	-39.52
A11	0.44	7.37	0.17	0.14
A12	0.94	7.76	0.02	0.17
A13	0.43	9.26	0.21	-0.11
A14	1.05	9.25	0.35	0.69
A15	0.43	10.59	0.47	-0.49
A16	0.88	3.93	0.25	0.06
A17	0.31	23.42	-0.03	0.37
A18	0.82	4.88	0.77	0.21
A19	0.93	-10.09	2.92	0.67
A20	0.65	6.19	10.96	-1.95
A21	0.37	6.26	0.29	0.28
A22	1	-0.71	0.08	0.15
A23	0.8	23.12	0.41	0.29
A24	0.78	12.57	1.19	0.39
A25	0.44	-2.14	-0.2	-1.74
A26	1.29	6.83	1.29	0.2
A27	0.42	2.44	0.51	0.9
A28	0.12	11.53	0.33	0.54
A29	0.52	5.35	-0.44	-0.32
A30	0.13	-1.22	0.01	-0.44
A31	6.87	-6.58	-6.38	-5.13
A32	3.79	26.41	5.07	-1.14
A33	0.54	-0.12	0.83	0.54
A34	0.35	40.94	-4.49	-0.41
A35	-0.46	-11.93	0.12	-0.28
A36	3.83	6.86	-0.04	-0.58
A37	0.12	2.51	0.21	0.29
A38	1.42	5.98	8.94	0.8
A39	0.55	8.02	-0.03	-0.58
A40	0.52	5.11	0.41	-0.03
A41	-0.86	-4.02	-2.27	-3.67
A42	0.3	-4.99	0.63	0.001
A43	0.69	1.64	1.59	0.38
A44	0.45	6.9	0.38	0.05
A45	-1.03	16.83	-7.46	-2.27
A46	0.49	11.76	-0.26	-0.18
A47	2.32	-9.68	6.14	-1.63
A48	-0.8	-0.36	1.06	-6.68
A49	0.38	42.18	-10.45	-1.37
A50	0.39	29.65	-3.27	-0.61
A51	0.95	14.11	0.18	0.05
A52	5.73	5.66	4.14	4.42
A53	0.46	5.17	0.21	-0.16
A54	1.34	13.41	0.6	0.33
A55	1.12	8.86	0.5	0.3
A56	0.4	44.25	-4.24	-1.3
A57	0.4	1.66	1.22	0.45
A58	1.19	15.45	0.87	0.51
A59	0.77	6.27	0.04	-0.08
A60	1.22	4.97	0.49	0.87
A61	-2.24	0.29	-0.61	-7.52
A62	-0.39	9.53	-7.63	-17.32
A63	0.63	8.37	0.82	-0.62
A64	-2.81	16.29	-2.49	-1.07
A65	1.55	12.04	-0.15	-0.07
A66	1.26	7.66	0.96	0.5
A67	2.12	8.79	1.33	0.75
A68	0.05	3.51	-0.01	-0.76
A69	0.4	3.41	0.89	0.45
A70	1.1	4.58	0.69	0.18
A71	3.36	-12.62	7.72	2.42
A72	0.5	5.77	0.05	0.19
A73	0.5	6.75	1.7	0.57
A74	-0.38	-4.14	-0.24	-1.15
A75	-0.3	5.28	-0.32	-0.76
A76	-3.24	1.74	-2.1	-6.15
A77	1.59	6.14	0.38	0.64
A78	5.71	7.47	2.68	0.58
A79	1.49	4.8	6.28	1.01
A80	0.44	2.55	-0.19	-0.31
A81	25.05	5.85	8.72	4.99
A82	0.39	25.87	1.19	2.08
A83	-1.84	4.45	0.76	-15.71
A84	0.76	24.98	-0.86	-0.12
A85	0.38	12.11	-0.01	0.04
A86	-0.45	2.21	-0.55	-0.85
A87	11.93	0.52	7.34	4.14
A88	0.41	2.29	0.32	0.51
A89	0.37	13	-0.24	-0.15
A90	0.52	13	0.25	0.21
A91	0.62	13	0.57	0.41
A92	3.59	0.43	0.99	0.67
A93	0.27	-3.24	-0.72	0.1
A94	3.67	4.11	2.08	0.98
A95	0.53	13.99	-0.72	-0.77
A96	2.37	1.3	1.53	0.52
A97	0.31	150.6	-44.82	-0.39
A98	0.7	0.82	-10.53	-3.84
A99	38.01	-8.5	18.27	22.9
A100	3.99	3.1	2.22	2.13
A101	0.8	6.04	1.68	-0.12
A102	1.14	17.35	3.04	1.1
A103	0.39	8.03	0.04	-0.88
A104	0.09	1.68	-0.23	-0.47
A105	0.31	8.31	0.02	0.46
A106	1.13	4.21	0.03	-0.82
A107	0.41	5.49	-0.05	0.24
A108	0.22	2.71	-0.3	-0.35
A109	-0.12	28.05	-7.91	-0.69
A110	0.32	0.13	0.06	0.09
A111	0.97	2.28	1	-0.22
A112	2.45	14.74	0.08	0.35
A113	-9.06	9.5	-5.81	-9.86
A114	2.25	9.97	5	1.22
A115	0.54	20.14	1.14	0.23
A116	0.86	10.1	0.44	0.06
A117	0.53	12.98	0.31	-0.44
A118	-1.35	48.86	-2.76	-0.25
A119	0.35	0.52	0.36	0.09
A120	4.96	0.81	0.04	-8.1
A121	1.08	20.63	2.94	0.24
A122	0.25	12.54	0.18	0.26
A123	9.99	5.53	4.76	2.81
A124	0.28	11.58	-0.28	0.21
A125	0.4	4.05	-0.16	-0.67
A126	0.28	10.87	0.11	-0.29
A127	0.5	6.82	0.48	-0.11
A128	0.96	6.33	0.6	0.67
A129	0.62	7.72	0.34	0.07
A130	1.35	18.57	1.54	0.29
A131	0.27	4.96	-0.03	-0.11
A132	0.38	-3.64	-2.21	-1.07
A133	0.28	7.87	0.3	0.18
A134	0.4	4.97	-0.07	-0.35
A135	1.05	0.23	0.25	0.01
A136	0.23	-0.01	0.37	0.45
A137	0.73	9.57	0.06	-0.02
A138	0.42	6.19	-0.18	-0.01
A139	1.01	11.38	1.29	0.26
A140	0.26	-1.14	0.2	-0.14
MAX	38.01	150.6	18.27	22.9
MIN	-9.06	-12.62	-44.82	-39.52
	1	1	1	1
	Normalizacija
nij	C1	C2	C3	C4
A1	0.0495007	0.125659	0.687906	0.588593
A2	0.201402	0.0501777	0.749247	0.645787
A3	0.196516	0.0834457	0.712474	0.6405
A4	0.204376	0.0964343	0.719924	0.627363
A5	0.201402	0.0959441	0.715644	0.633291
A6	0.213724	0.151575	0.727532	0.643384
A7	0.319524	0.0983335	0.793311	0.673182
A8	0.200127	0.0956378	0.706768	0.624479
A9	0.22116	0.129151	0.703915	0.622397
A10	0.151264	0.0997427	0.71295	0
A11	0.201827	0.122473	0.713108	0.635373
A12	0.21245	0.124862	0.710731	0.635854
A13	0.201615	0.134052	0.713742	0.631368
A14	0.214786	0.133991	0.715961	0.644185
A15	0.201615	0.142201	0.717863	0.62528
A16	0.211175	0.101397	0.714376	0.634092
A17	0.199065	0.220806	0.709938	0.639058
A18	0.2099	0.107217	0.722618	0.636495
A19	0.212237	0.0155006	0.756697	0.643864
A20	0.206289	0.115243	0.884134	0.60189
A21	0.20034	0.115672	0.71501	0.637616
A22	0.213724	0.072969	0.711682	0.635533
A23	0.209475	0.218968	0.716912	0.637776
A24	0.20905	0.154332	0.729276	0.639378
A25	0.201827	0.0642078	0.707244	0.605255
A26	0.219885	0.119164	0.730861	0.636335
A27	0.201402	0.0922681	0.718497	0.647549
A28	0.195029	0.14796	0.715644	0.641781
A29	0.203527	0.110097	0.70344	0.628004
A30	0.195241	0.0698444	0.710572	0.626081
A31	0.338432	0.0370053	0.609288	0.550945
A32	0.272998	0.239125	0.790775	0.614867
A33	0.203952	0.0765838	0.72357	0.641781
A34	0.199915	0.328146	0.639246	0.626562
A35	0.182707	0.00422742	0.712316	0.628645
A36	0.273847	0.119348	0.70978	0.623839
A37	0.195029	0.092697	0.713742	0.637776
A38	0.222647	0.113957	0.852116	0.645947
A39	0.204164	0.126455	0.709938	0.623839
A40	0.203527	0.108626	0.716912	0.63265
A41	0.174209	0.0526896	0.674433	0.574335
A42	0.198853	0.0467467	0.720399	0.633146
A43	0.207138	0.0873667	0.735616	0.639218
A44	0.20204	0.119593	0.716437	0.633931
A45	0.170597	0.180431	0.59217	0.596764
A46	0.202889	0.149369	0.706293	0.630247
A47	0.241768	0.0180125	0.807735	0.607017
A48	0.175483	0.0751133	0.727215	0.526113
A49	0.200552	0.335743	0.544777	0.611182
A50	0.200765	0.258976	0.658583	0.623358
A51	0.212662	0.163767	0.713267	0.633931
A52	0.314213	0.111996	0.776034	0.703941
A53	0.202252	0.108994	0.713742	0.630567
A54	0.220948	0.159478	0.719924	0.638417
A55	0.216274	0.131602	0.718339	0.637937
A56	0.200977	0.348425	0.643208	0.612304
A57	0.200977	0.0874893	0.729751	0.64034
A58	0.217761	0.171976	0.724204	0.641301
A59	0.208838	0.115733	0.711048	0.631849
A60	0.218398	0.107769	0.71818	0.647068
A61	0.144891	0.0790957	0.700745	0.512656
A62	0.184194	0.135706	0.589475	0.355655
A63	0.205864	0.128599	0.723411	0.623198
A64	0.132781	0.177123	0.670946	0.615988
A65	0.225409	0.151084	0.708036	0.632009
A66	0.219248	0.124249	0.72563	0.641141
A67	0.237519	0.131173	0.731495	0.645146
A68	0.193542	0.0988237	0.710255	0.620955
A69	0.200977	0.098211	0.724521	0.64034
A70	0.215849	0.105379	0.72135	0.636014
A71	0.263862	0	0.832779	0.6719
A72	0.203102	0.11267	0.711206	0.636174
A73	0.203102	0.118674	0.737359	0.642262
A74	0.184406	0.0519544	0.70661	0.614707
A75	0.186106	0.109668	0.705342	0.620955
A76	0.123646	0.0879794	0.677128	0.534604
A77	0.226259	0.114937	0.716437	0.643384
A78	0.313788	0.123085	0.752893	0.642422
A79	0.224134	0.106727	0.809954	0.649311
A80	0.201827	0.092942	0.707402	0.628164
A81	0.724665	0.11316	0.848629	0.713073
A82	0.200765	0.235817	0.729276	0.666453
A83	0.153389	0.104583	0.72246	0.381448
A84	0.208625	0.230364	0.696782	0.631208
A85	0.200552	0.151513	0.710255	0.633771
A86	0.182919	0.090859	0.701696	0.619513
A87	0.445932	0.0805048	0.826755	0.699455
A88	0.20119	0.0913491	0.715486	0.641301
A89	0.20034	0.156966	0.70661	0.630727
A90	0.203527	0.156966	0.714376	0.636495
A91	0.205651	0.156966	0.719448	0.639699
A92	0.268749	0.0799534	0.726106	0.643864
A93	0.198215	0.0574684	0.699001	0.634732
A94	0.270448	0.1025	0.743382	0.648831
A95	0.203739	0.163031	0.699001	0.620795
A96	0.24283	0.0852837	0.734665	0.641461
A97	0.199065	1	0	0.626882
A98	0.207351	0.0823429	0.543509	0.571612
A99	1	0.025242	1	1
A100	0.277247	0.0963117	0.745602	0.667254
A101	0.209475	0.114324	0.737042	0.631208
A102	0.216699	0.183617	0.758599	0.650753
A103	0.200765	0.126516	0.711048	0.619032
A104	0.194391	0.0876118	0.706768	0.625601
A105	0.199065	0.128232	0.710731	0.6405
A106	0.216486	0.103112	0.710889	0.619994
A107	0.20119	0.110955	0.709621	0.636975
A108	0.197153	0.0939223	0.705659	0.627523
A109	0.18993	0.249173	0.585037	0.622076
A110	0.199278	0.0781154	0.711365	0.634572
A111	0.213087	0.0912878	0.726264	0.629606
A112	0.244529	0.167627	0.711682	0.638738
A113	0	0.135523	0.618323	0.475168
A114	0.24028	0.138402	0.789666	0.652675
A115	0.203952	0.200711	0.728483	0.636815
A116	0.21075	0.139199	0.717388	0.634092
A117	0.203739	0.156844	0.715327	0.626081
A118	0.163799	0.37667	0.666667	0.629125
A119	0.199915	0.0805048	0.71612	0.634572
A120	0.297854	0.0822816	0.711048	0.503364
A121	0.215424	0.203713	0.757014	0.636975
A122	0.197791	0.154148	0.713267	0.637296
A123	0.404716	0.1112	0.785861	0.678148
A124	0.198428	0.148266	0.705976	0.636495
A125	0.200977	0.102132	0.707878	0.622397
A126	0.198428	0.143916	0.712157	0.628484
A127	0.203102	0.119103	0.718022	0.631368
A128	0.212874	0.116101	0.719924	0.643864
A129	0.205651	0.124617	0.715803	0.634252
A130	0.22116	0.191092	0.734823	0.637776
A131	0.198215	0.107707	0.709938	0.631368
A132	0.200552	0.0550178	0.675384	0.615988
A133	0.198428	0.125536	0.715169	0.636014
A134	0.200977	0.107769	0.709304	0.627523
A135	0.214786	0.0787281	0.714376	0.633291
A136	0.197366	0.0772577	0.716278	0.64034
A137	0.207988	0.135951	0.711365	0.63281
A138	0.201402	0.115243	0.707561	0.63297
A139	0.213937	0.147041	0.730861	0.637296
A140	0.198003	0.0703345	0.713584	0.630888
	0.163265	0.163265	0.244898	0.428571
vij	C1	C2	C3	C4
A1	0.00808174	0.0205157	0.168467	0.252254
A2	0.0328819	0.00819226	0.183489	0.276765
A3	0.0320842	0.0136238	0.174484	0.2745
A4	0.0333675	0.0157443	0.176308	0.26887
A5	0.0328819	0.0156643	0.17526	0.27141
A6	0.0348937	0.0247468	0.178171	0.275736
A7	0.0521671	0.0160544	0.19428	0.288506
A8	0.0326738	0.0156143	0.173086	0.267634
A9	0.0361077	0.0210858	0.172387	0.266741
A10	0.0246961	0.0162845	0.1746	0
A11	0.0329513	0.0199955	0.174639	0.272303
A12	0.0346856	0.0203856	0.174057	0.272509
A13	0.0329166	0.021886	0.174794	0.270586
A14	0.0350671	0.021876	0.175337	0.276079
A15	0.0329166	0.0232164	0.175803	0.267977
A16	0.0344775	0.0165546	0.174949	0.271753
A17	0.0325004	0.0360499	0.173862	0.273882
A18	0.0342693	0.0175048	0.176968	0.272783
A19	0.0346509	0.0025307	0.185314	0.275942
A20	0.0336797	0.0188152	0.216523	0.257953
A21	0.0327085	0.0188852	0.175105	0.273264
A22	0.0348937	0.0119133	0.174289	0.272371
A23	0.0342	0.0357499	0.17557	0.273332
A24	0.0341306	0.0251969	0.178598	0.274019
A25	0.0329513	0.0104829	0.173203	0.259395
A26	0.0358996	0.0194554	0.178986	0.272715
A27	0.0328819	0.0150642	0.175959	0.277521
A28	0.0318414	0.0241567	0.17526	0.275049
A29	0.0332288	0.017975	0.172271	0.269144
A30	0.031876	0.0114031	0.174018	0.26832
A31	0.0552541	0.00604167	0.149213	0.236119
A32	0.044571	0.0390408	0.193659	0.263514
A33	0.0332982	0.0125034	0.177201	0.275049
A34	0.0326391	0.0535748	0.15655	0.268526
A35	0.0298296	0.00069019	0.174445	0.269419
A36	0.0447097	0.0194854	0.173824	0.267359
A37	0.0318414	0.0151342	0.174794	0.273332
A38	0.0363505	0.0186051	0.208682	0.276834
A39	0.0333328	0.0206457	0.173862	0.267359
A40	0.0332288	0.0177349	0.17557	0.271135
A41	0.0284422	0.00860237	0.165167	0.246143
A42	0.0324657	0.0076321	0.176424	0.271348
A43	0.0338184	0.0142639	0.180151	0.27395
A44	0.032986	0.0195254	0.175454	0.271685
A45	0.0278525	0.0294581	0.145021	0.255756
A46	0.0331247	0.0243867	0.17297	0.270105
A47	0.0394722	0.00294081	0.197813	0.26015
A48	0.0286503	0.0122634	0.178094	0.225477
A49	0.0327432	0.0548151	0.133415	0.261935
A50	0.0327779	0.0422817	0.161286	0.267153
A51	0.0347203	0.0267374	0.174678	0.271685
A52	0.0513	0.018285	0.190049	0.301689
A53	0.0330207	0.0177949	0.174794	0.270243
A54	0.036073	0.0260372	0.176308	0.273607
A55	0.0353099	0.0214859	0.17592	0.273401
A56	0.0328126	0.0568857	0.15752	0.262416
A57	0.0328126	0.0142839	0.178715	0.274431
A58	0.0355527	0.0280777	0.177356	0.274843
A59	0.0340959	0.0188952	0.174134	0.270792
A60	0.0356568	0.0175948	0.175881	0.277315
A61	0.0236556	0.0129136	0.171611	0.21971
A62	0.0300724	0.0221561	0.144361	0.152424
A63	0.0336103	0.0209958	0.177162	0.267084
A64	0.0216785	0.028918	0.164313	0.263995
A65	0.0368014	0.0246668	0.173397	0.270861
A66	0.0357955	0.0202856	0.177705	0.274774
A67	0.0387785	0.0214159	0.179142	0.276491
A68	0.0315986	0.0161344	0.17394	0.266123
A69	0.0328126	0.0160344	0.177434	0.274431
A70	0.0352405	0.0172047	0.176657	0.272577
A71	0.0430795	0	0.203946	0.287957
A72	0.0331594	0.0183951	0.174173	0.272646
A73	0.0331594	0.0193753	0.180578	0.275255
A74	0.0301071	0.00848234	0.173047	0.263446
A75	0.0303846	0.0179049	0.172737	0.266123
A76	0.020187	0.014364	0.165827	0.229116
A77	0.0369401	0.0187652	0.175454	0.275736
A78	0.0512306	0.0200955	0.184382	0.275324
A79	0.0365933	0.0174248	0.198356	0.278276
A80	0.0329513	0.0151742	0.173241	0.269213
A81	0.118312	0.0184751	0.207828	0.305602
A82	0.0327779	0.0385006	0.178598	0.285622
A83	0.025043	0.0170747	0.176929	0.163478
A84	0.0340612	0.0376104	0.170641	0.270517
A85	0.0327432	0.0247368	0.17394	0.271616
A86	0.0298643	0.0148341	0.171844	0.265505
A87	0.072805	0.0131436	0.202471	0.299766
A88	0.0328472	0.0149141	0.175221	0.274843
A89	0.0327085	0.0256271	0.173047	0.270311
A90	0.0332288	0.0256271	0.174949	0.272783
A91	0.0335756	0.0256271	0.176191	0.274156
A92	0.0438773	0.0130536	0.177822	0.275942
A93	0.0323616	0.00938259	0.171184	0.272028
A94	0.0441547	0.0167346	0.182053	0.27807
A95	0.0332635	0.0266173	0.171184	0.266055
A96	0.0396456	0.0139238	0.179918	0.274912
A97	0.0325004	0.163265	0	0.268664
A98	0.0338531	0.0134437	0.133104	0.244976
A99	0.163265	0.00412114	0.244898	0.428571
A100	0.0452647	0.0157243	0.182596	0.285966
A101	0.0342	0.0186651	0.1805	0.270517
A102	0.0353793	0.0299783	0.185779	0.278894
A103	0.0327779	0.0206557	0.174134	0.265299
A104	0.0317373	0.0143039	0.173086	0.268114
A105	0.0325004	0.0209358	0.174057	0.2745
A106	0.0353446	0.0168346	0.174095	0.265711
A107	0.0328472	0.018115	0.173785	0.272989
A108	0.0321882	0.0153342	0.172814	0.268938
A109	0.0310089	0.0406812	0.143274	0.266604
A110	0.0325351	0.0127535	0.174212	0.271959
A111	0.0347896	0.0149041	0.177861	0.269831
A112	0.0399231	0.0273675	0.174289	0.273744
A113	0	0.0221261	0.151426	0.203643
A114	0.0392294	0.0225962	0.193388	0.279718
A115	0.0332982	0.032769	0.178404	0.27292
A116	0.0344081	0.0227263	0.175687	0.271753
A117	0.0332635	0.0256071	0.175182	0.26832
A118	0.0267426	0.061497	0.163265	0.269625
A119	0.0326391	0.0131436	0.175376	0.271959
A120	0.0486292	0.0134337	0.174134	0.215727
A121	0.0351712	0.0332592	0.185391	0.272989
A122	0.0322923	0.0251669	0.174678	0.273126
A123	0.066076	0.018155	0.192456	0.290635
A124	0.0323963	0.0242067	0.172892	0.272783
A125	0.0328126	0.0166746	0.173358	0.266741
A126	0.0323963	0.0234965	0.174406	0.26935
A127	0.0331594	0.0194454	0.175842	0.270586
A128	0.0347549	0.0189552	0.176308	0.275942
A129	0.0335756	0.0203456	0.175299	0.271822
A130	0.0361077	0.0311986	0.179957	0.273332
A131	0.0323616	0.0175848	0.173862	0.270586
A132	0.0327432	0.00898248	0.1654	0.263995
A133	0.0323963	0.0204956	0.175143	0.272577
A134	0.0328126	0.0175948	0.173707	0.268938
A135	0.0350671	0.0128535	0.174949	0.27141
A136	0.0322229	0.0126135	0.175415	0.274431
A137	0.0339572	0.0221961	0.174212	0.271204
A138	0.0328819	0.0188152	0.17328	0.271273
A139	0.0349284	0.0240066	0.178986	0.273126
A140	0.032327	0.0114832	0.174755	0.27038
max=ti	0.163265	0.163265	0.244898	0.428571									0.428571
min=tai	0	0	0	0									0
d+	C1	C2	C3	C4									S+	Ki+
A1	0.420489	0.408055	0.260104	0.176317									1.26497	0.564667
A2	0.395689	0.420379	0.245082	0.151806									1.21296	0.58888
A3	0.396487	0.414947	0.254087	0.154071									1.21959	0.585675
A4	0.395203	0.412827	0.252263	0.159701									1.21999	0.585482
A5	0.395689	0.412907	0.253311	0.157161									1.21907	0.585927
A6	0.393677	0.403824	0.2504	0.152835									1.20074	0.594872
A7	0.376404	0.412517	0.234291	0.140065									1.16328	0.614029
A8	0.395897	0.412957	0.255485	0.160937									1.22528	0.582958
A9	0.392463	0.407485	0.256184	0.16183									1.21796	0.586459
A10	0.403875	0.412287	0.253971	0.428571									1.4987	0.476602
A11	0.39562	0.408575	0.253932	0.156268									1.2144	0.588181
A12	0.393885	0.408185	0.254514	0.156062									1.21265	0.589029
A13	0.395654	0.406685	0.253777	0.157985									1.2141	0.588324
A14	0.393504	0.406695	0.253234	0.152492									1.20592	0.592313
A15	0.395654	0.405355	0.252768	0.160594									1.21437	0.588194
A16	0.394094	0.412016	0.253622	0.156818									1.21655	0.58714
A17	0.396071	0.392521	0.254709	0.154689									1.19799	0.596236
A18	0.394302	0.411066	0.251603	0.155788									1.21276	0.588975
A19	0.39392	0.42604	0.243257	0.152629									1.21585	0.587479
A20	0.394891	0.409756	0.212048	0.170618									1.18731	0.601598
A21	0.395863	0.409686	0.253466	0.155307									1.21432	0.588217
A22	0.393677	0.416658	0.254282	0.1562									1.22082	0.585088
A23	0.394371	0.392821	0.253001	0.155239									1.19543	0.597512
A24	0.39444	0.403374	0.249973	0.154552									1.20234	0.594079
A25	0.39562	0.418088	0.255368	0.169176									1.23825	0.576849
A26	0.392671	0.409116	0.249585	0.155856									1.20723	0.591674
A27	0.395689	0.413507	0.252612	0.15105									1.21286	0.588927
A28	0.39673	0.404414	0.253311	0.153522									1.20798	0.591307
A29	0.395342	0.410596	0.2563	0.159427									1.22167	0.584682
A30	0.396695	0.417168	0.254553	0.160251									1.22867	0.58135
A31	0.373317	0.422529	0.279358	0.192452									1.26766	0.563469
A32	0.384	0.38953	0.234912	0.165057									1.1735	0.60868
A33	0.395273	0.416068	0.25137	0.153522									1.21623	0.587293
A34	0.395932	0.374996	0.272021	0.160045									1.20299	0.593756
A35	0.398741	0.427881	0.254126	0.159152									1.2399	0.576082
A36	0.383861	0.409086	0.254747	0.161212									1.20891	0.590852
A37	0.39673	0.413437	0.253777	0.155239									1.21918	0.585872
A38	0.392221	0.409966	0.219889	0.151737									1.17381	0.608517
A39	0.395238	0.407925	0.254709	0.161212									1.21908	0.585919
A40	0.395342	0.410836	0.253001	0.157436									1.21661	0.587109
A41	0.400129	0.419969	0.263404	0.182428									1.26593	0.564238
A42	0.396105	0.420939	0.252147	0.157223									1.22641	0.582418
A43	0.394753	0.414307	0.24842	0.154621									1.2121	0.589295
A44	0.395585	0.409046	0.253117	0.156886									1.21463	0.588066
A45	0.400718	0.399113	0.28355	0.172815									1.2562	0.568609
A46	0.395446	0.404184	0.255601	0.158466									1.2137	0.58852
A47	0.389099	0.42563	0.230758	0.168421									1.21391	0.588418
A48	0.399921	0.416308	0.250477	0.203094									1.2698	0.562518
A49	0.395828	0.373756	0.295156	0.166636									1.23138	0.580071
A50	0.395793	0.386289	0.267285	0.161418									1.21079	0.589935
A51	0.393851	0.401834	0.253893	0.156886									1.20646	0.592048
A52	0.377271	0.410286	0.238522	0.126882									1.15296	0.619522
A53	0.39555	0.410776	0.253777	0.158328									1.21843	0.586233
A54	0.392498	0.402534	0.252263	0.154964									1.20226	0.594119
A55	0.393261	0.407085	0.252651	0.15517									1.20817	0.591214
A56	0.395758	0.371685	0.271051	0.166155									1.20465	0.59294
A57	0.395758	0.414287	0.249856	0.15414									1.21404	0.588353
A58	0.393018	0.400493	0.251215	0.153728									1.19845	0.596005
A59	0.394475	0.409676	0.254437	0.157779									1.21637	0.587228
A60	0.392914	0.410976	0.25269	0.151256									1.20784	0.591375
A61	0.404915	0.415657	0.25696	0.208861									1.28639	0.555261
A62	0.398499	0.406415	0.28421	0.276147									1.36527	0.523182
A63	0.394961	0.407575	0.251409	0.161487									1.21543	0.58768
A64	0.406893	0.399653	0.264258	0.164576									1.23538	0.578191
A65	0.39177	0.403904	0.255174	0.15771									1.20856	0.591022
A66	0.392775	0.408285	0.250866	0.153797									1.20572	0.592412
A67	0.389793	0.407155	0.249429	0.15208									1.19846	0.596004
A68	0.396972	0.412437	0.254631	0.162448									1.22649	0.582383
A69	0.395758	0.412537	0.251137	0.15414									1.21357	0.58858
A70	0.39333	0.411366	0.251914	0.155994									1.2126	0.58905
A71	0.385492	0.428571	0.224625	0.140614									1.1793	0.605685
A72	0.395412	0.410176	0.254398	0.155925									1.21591	0.587449
A73	0.395412	0.409196	0.247993	0.153316									1.20592	0.592317
A74	0.398464	0.420089	0.255524	0.165125									1.2392	0.576407
A75	0.398186	0.410666	0.255834	0.162448									1.22713	0.582076
A76	0.408384	0.414207	0.262744	0.199455									1.28479	0.555955
A77	0.391631	0.409806	0.253117	0.152835									1.20739	0.591595
A78	0.37734	0.408475	0.244189	0.153247									1.18325	0.603662
A79	0.391978	0.411146	0.230215	0.150295									1.18363	0.603468
A80	0.39562	0.413397	0.25533	0.159358									1.2237	0.583707
A81	0.310259	0.410096	0.220743	0.122969									1.06407	0.671278
A82	0.395793	0.39007	0.249973	0.142949									1.17878	0.60595
A83	0.403528	0.411496	0.251642	0.265093									1.33176	0.536347
A84	0.39451	0.390961	0.25793	0.158054									1.20145	0.594517
A85	0.395828	0.403834	0.254631	0.156955									1.21125	0.58971
A86	0.398707	0.413737	0.256727	0.163066									1.23224	0.579666
A87	0.355766	0.415427	0.2261	0.128805									1.1261	0.634301
A88	0.395724	0.413657	0.25335	0.153728									1.21646	0.587184
A89	0.395863	0.402944	0.255524	0.15826									1.21259	0.589057
A90	0.395342	0.402944	0.253622	0.155788									1.2077	0.591445
A91	0.394995	0.402944	0.25238	0.154415									1.20473	0.592899
A92	0.384694	0.415517	0.250749	0.152629									1.20359	0.593462
A93	0.396209	0.419188	0.257387	0.156543									1.22933	0.581037
A94	0.384416	0.411836	0.246518	0.150501									1.19327	0.598594
A95	0.395308	0.401954	0.257387	0.162516									1.21716	0.586843
A96	0.388925	0.414647	0.248653	0.153659									1.20589	0.592333
A97	0.396071	0.265306	0.428571	0.159907									1.24985	0.571494
A98	0.394718	0.415127	0.295467	0.183595									1.28891	0.554179
A99	0.265306	0.42445	0.183673	0									0.873429	0.817794
A100	0.383306	0.412847	0.245975	0.142605									1.18473	0.602908
A101	0.394371	0.409906	0.248071	0.158054									1.2104	0.590122
A102	0.393192	0.398593	0.242792	0.149677									1.18425	0.603152
A103	0.395793	0.407915	0.254437	0.163272									1.22142	0.5848
A104	0.396834	0.414267	0.255485	0.160457									1.22704	0.582119
A105	0.396071	0.407635	0.254514	0.154071									1.21229	0.589202
A106	0.393226	0.411736	0.254476	0.16286									1.2223	0.584379
A107	0.395724	0.410456	0.254786	0.155582									1.21655	0.587141
A108	0.396383	0.413237	0.255757	0.159633									1.22501	0.583086
A109	0.397562	0.38789	0.285297	0.161967									1.23272	0.57944
A110	0.396036	0.415817	0.254359	0.156612									1.22282	0.584127
A111	0.393781	0.413667	0.25071	0.15874									1.2169	0.586972
A112	0.388648	0.401203	0.254282	0.154827									1.19896	0.595754
A113	0.428571	0.406445	0.277145	0.224928									1.33709	0.534209
A114	0.389342	0.405975	0.235183	0.148853									1.17935	0.605658
A115	0.395273	0.395802	0.250167	0.155651									1.19689	0.596783
A116	0.394163	0.405845	0.252884	0.156818									1.20971	0.59046
A117	0.395308	0.402964	0.253389	0.160251									1.21191	0.589387
A118	0.401828	0.367074	0.265306	0.158946									1.19315	0.598653
A119	0.395932	0.415427	0.253195	0.156612									1.22117	0.584921
A120	0.379942	0.415137	0.254437	0.212844									1.26236	0.565833
A121	0.3934	0.395312	0.24318	0.155582									1.18747	0.601517
A122	0.396279	0.403404	0.253893	0.155445									1.20902	0.590796
A123	0.362495	0.410416	0.236115	0.137936									1.14696	0.622762
A124	0.396175	0.404364	0.255679	0.155788									1.21201	0.589341
A125	0.395758	0.411896	0.255213	0.16183									1.2247	0.583234
A126	0.396175	0.405075	0.254165	0.159221									1.21464	0.588066
A127	0.395412	0.409126	0.252729	0.157985									1.21525	0.587767
A128	0.393816	0.409616	0.252263	0.152629									1.20832	0.591137
A129	0.394995	0.408225	0.253272	0.156749									1.21324	0.588741
A130	0.392463	0.397372	0.248614	0.155239									1.19369	0.598385
A131	0.396209	0.410986	0.254709	0.157985									1.21989	0.585533
A132	0.395828	0.419589	0.263171	0.164576									1.24316	0.574571
A133	0.396175	0.408075	0.253428	0.155994									1.21367	0.588532
A134	0.395758	0.410976	0.254864	0.159633									1.22123	0.584889
A135	0.393504	0.415717	0.253622	0.157161									1.22	0.585478
A136	0.396348	0.415958	0.253156	0.15414									1.2196	0.585671
A137	0.394614	0.406375	0.254359	0.157367									1.21271	0.588997
A138	0.395689	0.409756	0.255291	0.157298									1.21803	0.586425
A139	0.393643	0.404564	0.249585	0.155445									1.20324	0.593637
A140	0.396244	0.417088	0.253816	0.158191									1.22534	0.582929
min	0.265306	0.265306	0.183673	0									0.714285	1		A1	0.506993	130
RADIS	Ranking Alternatives from Average Distance from the Ideal Solution															A2	0.545105	65
d-	C1	C2	C3	C4									S-	Ki-		A3	0.540183	96
A1	0.00808174	0.0205157	0.168467	0.252254									0.449318	0.449319		A4	0.539886	99
A2	0.0328819	0.00819226	0.183489	0.276765									0.501329	0.501329		A5	0.540572	93
A3	0.0320842	0.0136238	0.174484	0.2745									0.494691	0.494692		A6	0.55421	27
A4	0.0333675	0.0157443	0.176308	0.26887									0.494289	0.49429		A7	0.582519	6
A5	0.0328819	0.0156643	0.17526	0.27141									0.495216	0.495217		A8	0.535983	111
A6	0.0348937	0.0247468	0.178171	0.275736									0.513547	0.513548		A9	0.541391	90
A7	0.0521671	0.0160544	0.19428	0.288506									0.551008	0.551009		A10	0.346091	140
A8	0.0326738	0.0156143	0.173086	0.267634									0.489008	0.489008		A11	0.544035	75
A9	0.0361077	0.0210858	0.172387	0.266741									0.496322	0.496323		A12	0.545333	61
A10	0.0246961	0.0162845	0.1746	0									0.215581	0.215581		A13	0.544254	72
A11	0.0329513	0.0199955	0.174639	0.272303									0.499888	0.499889		A14	0.550337	39
A12	0.0346856	0.0203856	0.174057	0.272509									0.501636	0.501637		A15	0.544054	74
A13	0.0329166	0.021886	0.174794	0.270586									0.500183	0.500183		A16	0.542438	86
A14	0.0350671	0.021876	0.175337	0.276079									0.508359	0.50836		A17	0.556266	23
A15	0.0329166	0.0232164	0.175803	0.267977									0.499913	0.499914		A18	0.54525	63
A16	0.0344775	0.0165546	0.174949	0.271753									0.497735	0.497735		A19	0.542958	80
A17	0.0325004	0.0360499	0.173862	0.273882									0.516294	0.516295		A20	0.564284	16
A18	0.0342693	0.0175048	0.176968	0.272783									0.501525	0.501526		A21	0.54409	73
A19	0.0346509	0.0025307	0.185314	0.275942									0.498437	0.498437		A22	0.539278	101
A20	0.0336797	0.0188152	0.216523	0.257953									0.52697	0.526971		A23	0.558183	21
A21	0.0327085	0.0188852	0.175105	0.273264									0.499962	0.499963		A24	0.553012	30
A22	0.0348937	0.0119133	0.174289	0.272371									0.493468	0.493468		A25	0.52644	123
A23	0.0342	0.0357499	0.17557	0.273332									0.518853	0.518853		A26	0.549365	41
A24	0.0341306	0.0251969	0.178598	0.274019									0.511945	0.511945		A27	0.545176	64
A25	0.0329513	0.0104829	0.173203	0.259395									0.476031	0.476032		A28	0.548807	45
A26	0.0358996	0.0194554	0.178986	0.272715									0.507056	0.507056		A29	0.53865	105
A27	0.0328819	0.0150642	0.175959	0.277521									0.501425	0.501426		A30	0.533484	117
A28	0.0318414	0.0241567	0.17526	0.275049									0.506307	0.506307		A31	0.505049	132
A29	0.0332288	0.017975	0.172271	0.269144									0.492619	0.492619		A32	0.574733	7
A30	0.031876	0.0114031	0.174018	0.26832									0.485617	0.485618		A33	0.542672	82
A31	0.0552541	0.00604167	0.149213	0.236119									0.446628	0.446629		A34	0.552523	31
A32	0.044571	0.0390408	0.193659	0.263514									0.540785	0.540786		A35	0.525233	125
A33	0.0332982	0.0125034	0.177201	0.275049									0.498051	0.498052		A36	0.548115	49
A34	0.0326391	0.0535748	0.15655	0.268526									0.51129	0.511291		A37	0.540487	95
A35	0.0298296	0.00069019	0.174445	0.269419									0.474383	0.474384		A38	0.574494	8
A36	0.0447097	0.0194854	0.173824	0.267359									0.505378	0.505378		A39	0.54056	94
A37	0.0318414	0.0151342	0.174794	0.273332									0.495102	0.495103		A40	0.542389	87
A38	0.0363505	0.0186051	0.208682	0.276834									0.540471	0.540472		A41	0.506297	131
A39	0.0333328	0.0206457	0.173862	0.267359									0.4952	0.495201		A42	0.535144	113
A40	0.0332288	0.0177349	0.17557	0.271135									0.497669	0.49767		A43	0.54574	57
A41	0.0284422	0.00860237	0.165167	0.246143									0.448355	0.448356		A44	0.543858	76
A42	0.0324657	0.0076321	0.176424	0.271348									0.48787	0.487871		A45	0.513349	128
A43	0.0338184	0.0142639	0.180151	0.27395									0.502184	0.502184		A46	0.544553	69
A44	0.032986	0.0195254	0.175454	0.271685									0.49965	0.49965		A47	0.544397	70
A45	0.0278525	0.0294581	0.145021	0.255756									0.458088	0.458088		A48	0.503501	133
A46	0.0331247	0.0243867	0.17297	0.270105									0.500587	0.500587		A49	0.53149	119
A47	0.0394722	0.00294081	0.197813	0.26015									0.500376	0.500376		A50	0.546717	53
A48	0.0286503	0.0122634	0.178094	0.225477									0.444484	0.444485		A51	0.549934	40
A49	0.0327432	0.0548151	0.133415	0.261935									0.482908	0.482909		A52	0.590423	5
A50	0.0327779	0.0422817	0.161286	0.267153									0.503498	0.503499		A53	0.541043	92
A51	0.0347203	0.0267374	0.174678	0.271685									0.50782	0.50782		A54	0.553072	29
A52	0.0513	0.018285	0.190049	0.301689									0.561323	0.561324		A55	0.548665	46
A53	0.0330207	0.0177949	0.174794	0.270243									0.495852	0.495853		A56	0.551287	34
A54	0.036073	0.0260372	0.176308	0.273607									0.512025	0.512026		A57	0.544298	71
A55	0.0353099	0.0214859	0.17592	0.273401									0.506117	0.506117		A58	0.555917	24
A56	0.0328126	0.0568857	0.15752	0.262416									0.509634	0.509635		A59	0.542573	83
A57	0.0328126	0.0142839	0.178715	0.274431									0.500242	0.500243		A60	0.548912	44
A58	0.0355527	0.0280777	0.177356	0.274843									0.515829	0.51583		A61	0.491576	135
A59	0.0340959	0.0188952	0.174134	0.270792									0.497917	0.497918		A62	0.436098	139
A60	0.0356568	0.0175948	0.175881	0.277315									0.506447	0.506448		A63	0.543267	79
A61	0.0236556	0.0129136	0.171611	0.21971									0.42789	0.42789		A64	0.528548	122
A62	0.0300724	0.0221561	0.144361	0.152424									0.349013	0.349014		A65	0.548374	48
A63	0.0336103	0.0209958	0.177162	0.267084									0.498852	0.498853		A66	0.550487	36
A64	0.0216785	0.028918	0.164313	0.263995									0.478905	0.478905		A67	0.555915	25
A65	0.0368014	0.0246668	0.173397	0.270861									0.505726	0.505726		A68	0.53509	114
A66	0.0357955	0.0202856	0.177705	0.274774									0.508561	0.508561		A69	0.544646	67
A67	0.0387785	0.0214159	0.179142	0.276491									0.515827	0.515827		A70	0.545365	60
A68	0.0315986	0.0161344	0.17394	0.266123									0.487796	0.487797		A71	0.570334	10
A69	0.0328126	0.0160344	0.177434	0.274431									0.500712	0.500712		A72	0.542911	81
A70	0.0352405	0.0172047	0.176657	0.272577									0.50168	0.50168		A73	0.550343	38
A71	0.0430795	0	0.203946	0.287957									0.534982	0.534983		A74	0.525745	124
A72	0.0331594	0.0183951	0.174173	0.272646									0.498373	0.498374		A75	0.534613	116
A73	0.0331594	0.0193753	0.180578	0.275255									0.508367	0.508368		A76	0.492725	134
A74	0.0301071	0.00848234	0.173047	0.263446									0.475082	0.475083		A77	0.549245	42
A75	0.0303846	0.0179049	0.172737	0.266123									0.487149	0.48715		A78	0.567347	12
A76	0.020187	0.014364	0.165827	0.229116									0.429494	0.429495		A79	0.567059	13
A77	0.0369401	0.0187652	0.175454	0.275736									0.506895	0.506895		A80	0.537144	108
A78	0.0512306	0.0200955	0.184382	0.275324									0.531032	0.531032		A81	0.660748	2
A79	0.0365933	0.0174248	0.198356	0.278276									0.53065	0.530651		A82	0.570725	9
A80	0.0329513	0.0151742	0.173241	0.269213									0.49058	0.49058		A83	0.459436	137
A81	0.118312	0.0184751	0.207828	0.305602									0.650217	0.650218		A84	0.553674	28
A82	0.0327779	0.0385006	0.178598	0.285622									0.535499	0.5355		A85	0.546373	54
A83	0.025043	0.0170747	0.176929	0.163478									0.382524	0.382525		A86	0.530857	120
A84	0.0340612	0.0376104	0.170641	0.270517									0.51283	0.51283		A87	0.611243	3
A85	0.0327432	0.0247368	0.17394	0.271616									0.503036	0.503037		A88	0.542505	84
A86	0.0298643	0.0148341	0.171844	0.265505									0.482048	0.482048		A89	0.545376	59
A87	0.072805	0.0131436	0.202471	0.299766									0.588186	0.588186		A90	0.549017	43
A88	0.0328472	0.0149141	0.175221	0.274843									0.497825	0.497826		A91	0.551225	35
A89	0.0327085	0.0256271	0.173047	0.270311									0.501694	0.501695		A92	0.552078	33
A90	0.0332288	0.0256271	0.174949	0.272783									0.506588	0.506589		A93	0.532997	118
A91	0.0335756	0.0256271	0.176191	0.274156									0.509551	0.509551		A94	0.559803	19
A92	0.0438773	0.0130536	0.177822	0.275942									0.510694	0.510695		A95	0.541982	89
A93	0.0323616	0.00938259	0.171184	0.272028									0.484956	0.484957		A96	0.550366	37
A94	0.0441547	0.0167346	0.182053	0.27807									0.521012	0.521013		A97	0.517962	127
A95	0.0332635	0.0266173	0.171184	0.266055									0.497119	0.49712		A98	0.489778	136
A96	0.0396456	0.0139238	0.179918	0.274912									0.508399	0.5084		A99	0.829325	1
A97	0.0325004	0.163265	0	0.268664									0.464429	0.464429		A100	0.56623	15
A98	0.0338531	0.0134437	0.133104	0.244976									0.425377	0.425378		A101	0.547003	52
A99	0.163265	0.00412114	0.244898	0.428571									0.840855	0.840856		A102	0.566592	14
A100	0.0452647	0.0157243	0.182596	0.285966									0.529551	0.529552		A103	0.538834	104
A101	0.0342	0.0186651	0.1805	0.270517									0.503883	0.503883		A104	0.534681	115
A102	0.0353793	0.0299783	0.185779	0.278894									0.530031	0.530031		A105	0.545598	58
A103	0.0327779	0.0206557	0.174134	0.265299									0.492867	0.492868		A106	0.538183	106
A104	0.0317373	0.0143039	0.173086	0.268114									0.487242	0.487242		A107	0.542439	85
A105	0.0325004	0.0209358	0.174057	0.2745									0.501992	0.501993		A108	0.536181	110
A106	0.0353446	0.0168346	0.174095	0.265711									0.491986	0.491986		A109	0.530505	121
A107	0.0328472	0.018115	0.173785	0.272989									0.497736	0.497737		A110	0.537794	107
A108	0.0321882	0.0153342	0.172814	0.268938									0.489275	0.489276		A111	0.542179	88
A109	0.0310089	0.0406812	0.143274	0.266604									0.481568	0.481569		A112	0.55554	26
A110	0.0325351	0.0127535	0.174212	0.271959									0.49146	0.49146		A113	0.455703	138
A111	0.0347896	0.0149041	0.177861	0.269831									0.497385	0.497386		A114	0.570295	11
A112	0.0399231	0.0273675	0.174289	0.273744									0.515324	0.515325		A115	0.557088	22
A113	0	0.0221261	0.151426	0.203643									0.377195	0.377196		A116	0.547517	51
A114	0.0392294	0.0225962	0.193388	0.279718									0.534931	0.534931		A117	0.54588	55
A115	0.0332982	0.032769	0.178404	0.27292									0.517392	0.517392		A118	0.559891	18
A116	0.0344081	0.0227263	0.175687	0.271753									0.504574	0.504575		A119	0.53902	102
A117	0.0332635	0.0256071	0.175182	0.26832									0.502373	0.502374		A120	0.508879	129
A118	0.0267426	0.061497	0.163265	0.269625									0.52113	0.52113		A121	0.564164	17
A119	0.0326391	0.0131436	0.175376	0.271959									0.493118	0.493119		A122	0.54803	50
A120	0.0486292	0.0134337	0.174134	0.215727									0.451924	0.451925		A123	0.595042	4
A121	0.0351712	0.0332592	0.185391	0.272989									0.526811	0.526811		A124	0.54581	56
A122	0.0322923	0.0251669	0.174678	0.273126									0.505263	0.505264		A125	0.53641	109
A123	0.066076	0.018155	0.192456	0.290635									0.567322	0.567322		A126	0.543857	77
A124	0.0323963	0.0242067	0.172892	0.272783									0.502278	0.502279		A127	0.5434	78
A125	0.0328126	0.0166746	0.173358	0.266741									0.489586	0.489587		A128	0.548548	47
A126	0.0323963	0.0234965	0.174406	0.26935									0.499649	0.499649		A129	0.544892	66
A127	0.0331594	0.0194454	0.175842	0.270586									0.499033	0.499033		A130	0.55949	20
A128	0.0347549	0.0189552	0.176308	0.275942									0.50596	0.50596		A131	0.539964	98
A129	0.0335756	0.0203456	0.175299	0.271822									0.501042	0.501042		A132	0.522846	126
A130	0.0361077	0.0311986	0.179957	0.273332									0.520595	0.520596		A133	0.544573	68
A131	0.0323616	0.0175848	0.173862	0.270586									0.494395	0.494396		A134	0.538971	103
A132	0.0327432	0.00898248	0.1654	0.263995									0.471121	0.471121		A135	0.539879	100
A133	0.0323963	0.0204956	0.175143	0.272577									0.500613	0.500613		A136	0.540177	97
A134	0.0328126	0.0175948	0.173707	0.268938									0.493053	0.493053		A137	0.545283	62
A135	0.0350671	0.0128535	0.174949	0.27141									0.49428	0.49428		A138	0.541337	91
A136	0.0322229	0.0126135	0.175415	0.274431									0.494683	0.494683		A139	0.552342	32
A137	0.0339572	0.0221961	0.174212	0.271204									0.501569	0.50157		A140	0.535937	112
A138	0.0328819	0.0188152	0.17328	0.271273									0.49625	0.49625
A139	0.0349284	0.0240066	0.178986	0.273126									0.511048	0.511048
A140	0.032327	0.0114832	0.174755	0.27038									0.488945	0.488946
max	0.163265	0.163265	0.244898	0.428571									0.999999

[truncated: 3 more sheets: 21_03, 21_06, FINAL RESULTS]
