# Supplementary material for: Proposal for an objective binary benchmarking framework that validates each other for comparing MCDM methods through data analytics
Source: PeerJ Comput Sci. 2023 Apr 25;9:e1350. doi: 10.7717/peerj-cs.1350 (PMC10159627; doi:10.7717/peerj-cs.1350)
Supplement: Supplemental Information 3 [file peerj-cs-09-1350-s003.xlsx]

## Sheet: MATRIS
	2021/06						2021/03					2020/12					2020/09					2020/06					2020/03					2019/12					2019/09					2019/06					2019/03
	Genel Analizler	ALTMAN Z SKOR	ROE	PD/DD	MVA mrg		ALTMAN Z SKOR	ROE	PD/DD	MVA mrg		ALTMAN Z SKOR	ROE	PD/DD	MVA mrg		ALTMAN Z SKOR	ROE	PD/DD	MVA mrg		ALTMAN Z SKOR	ROE	PD/DD	MVA mrg		ALTMAN Z SKOR	ROE	PD/DD	MVA mrg		ALTMAN Z SKOR	ROE	PD/DD	MVA mrg		ALTMAN Z SKOR	ROE	PD/DD	MVA mrg		ALTMAN Z SKOR	ROE	PD/DD	MVA mrg		ALTMAN Z SKOR	ROE	PD/DD
A1	ACSEL	-2.7	3.61	-0.95	-7.18		-1.06	-15.22	0.42	7.87		-6.73	7.89	-1.42	-2.78		11.49	3.93	2.7	3.03		3.8	5.19	0.94	1.35		-2.31	-19.12	-0.32	0.54		1.11	4.89	0.29	0.19		5.05	2.07	1.34	2.8		-3.37	12.57	-1.25	-3.12		-0.71	-23.22	0.15
A2	ADEL	0.18	5.56	1.01	-2.23		-0.73	-11.24	-1.42	3.48		0.42	-4.43	2.45	0.79		0.3	0.03	0.97	0.05		0.31	5.77	0.72	0.42		-1.22	8.94	-0.85	-0.2		0.85	-11.56	0.72	0.19		0.21	2.55	0.13	0.001		-0.08	-1.64	0.11	-0.04		-0.69	-5.67	-0.07
A3	AEFES	0.15	6.86	0.04	2.8		-0.57	-8.3	-0.16	-3.78		0.19	1	0.13	0.46		0.24	7.5	0.07	0.89		0.19	5.11	0.001	3.17		-0.66	-12.25	-0.18	-4.46		0.15	0.27	-0.03	0.19		0.32	7.41	0.11	0.8		0.21	5.11	0.11	3.88		-0.61	-5.59	-0.22
A4	AFYON	1.45	5.39	-0.66	-9.65		-0.31	2.97	-0.98	8.23		0.56	3.12	0.6	-0.36		1.49	2.09	0.71	-0.7		3.85	5.76	-0.25	2.91		-0.08	28.04	-0.55	2.07		0.11	-10.69	1.29	1.36		0.06	-10.31	0.5	0.69		-0.14	-7.9	-0.13	-1.72		-0.3	-8.32	0.03
A5	AKCNS	-0.18	5.51	-0.95	-2.87		-0.68	-7.44	0.51	3.11		0.42	3.04	0.33	0.01		0.46	5.71	-0.15	-0.5		0.94	3.54	1.01	1.06		-1.47	-9.97	-0.41	-0.08		0.8	1.93	0.56	0.21		0.42	2.73	0.05	0.01		0.3	0.62	-0.05	-0.24		-1.22	-14.43	0.02
A6	AKSA	0.45	14.19	0.89	0.19		-0.78	-16.97	-0.07	0.8		1	12.12	1.08	0.64		0.34	8.15	-0.2	-0.15		0.18	-0.61	0.42	0.12		-0.98	-14.17	-0.42	-0.33		0.34	3.06	0.42	0.21		0.35	5.12	-0.01	0.06		0.27	5.65	0.11	0.37		-0.67	-11.24	0.18
A7	ALCAR	-1.78	1.03	-2.34	-12.05		-4.03	-8.69	1.18	13.44		5.98	3.43	5.23	2.5		1.86	6.16	1.54	0.77		0.93	2.81	0.87	1.37		-1.87	-2.89	-0.59	-0.67		0.93	1.53	0.6	0.4		1.91	1.46	1.04	1.55		-1.43	0.51	-1.12	-1.76		-1.13	-12.28	0.01
A8	ALKA	2.6	5.24	-1.12	-4.52		-3.84	-27.37	1.52	5.45		0.36	2.99	-0.23	-0.54		0.73	10.59	0.14	-0.35		4.4	13.06	1.44	0.45		-2.36	-14.01	0.25	1.35		1.86	7.04	0.36	0.13		0.55	6.51	0.03	-0.05		1.24	8.5	-0.32	-0.66		-3.38	-26	0.29
A9	ALKIM	2.21	6	-1.03	-6.39		-2.9	-31.98	1.08	8.04		1.35	8.46	-0.41	-0.67		0.12	12.03	-0.47	-1.37		1.75	13.8	2.33	-0.14		-1.63	-27.07	0.49	3.53		2.53	8.94	0.55	0.25		0.48	7.58	-0.18	-0.33		1.25	11.63	0.33	-0.37		-2.38	-22.4	-0.11
A10	ALMAD	0.94	-16.36	-1.06	-34.63		-0.27	-46.85	-0.16	31.4		-1.94	3.66	0.16	-39.52		2.39	21.37	0.52	-28.61		0.95	2.72	1.64	73.46		0.45	3	0.02	25.79		0.41	22.59	-0.84	-2.71		-0.02	-14.79	0.74	2.68		0.16	22.23	-0.88	-11.21		-1.36	169.35	0.1
A11	ARCLK	0.15	3.04	-0.17	-0.16		-0.83	-13.11	0.1	-0.14		0.44	7.37	0.17	0.14		0.17	7.23	0.07	0.39		0.36	3.59	0.32	0.98		-0.89	-7.23	-0.53	-1.37		0.26	1.98	0.03	0.04		0.28	2.83	-0.02	0.13		0.29	2.48	0.15	0.61		-0.83	-7.88	0.001
A12	ARSAN	0.86	6.03	0.28	1.84		-1.11	-15.8	-0.33	-1.96		0.94	7.76	0.02	0.17		0.73	7.81	0.18	1		0.57	2.74	0.44	2.66		-0.52	-11.86	-0.21	-3.23		0.14	2.43	0.24	0.38		0.42	5.43	0.1	0.69		0.42	3.72	0.05	2.59		-0.34	1.28	-0.03
A13	ASUZU	0.06	2.5	-0.53	-1.58		-0.35	-1.07	0.1	1.44		0.43	9.26	0.21	-0.11		0.12	-0.81	0.17	-0.27		0.3	-2.84	0.95	1.64		-0.97	-7.1	-0.51	-0.98		0.59	7.28	0.31	0.05		0.29	-0.43	0.37	0.38		0.08	-0.28	0.02	0.55		-0.35	9.34	0.18
A14	ATEKS	-0.91	0.27	-0.83	-5.8		0.55	-7.6	0.89	6.58		1.05	9.25	0.35	0.69		0.49	-0.47	0.44	1.45		0.38	-0.93	0.26	2.12		-0.82	-2.87	-0.28	-3.23		0.33	0.78	0.2	0.39		0.78	0.6	0.54	1.64		-0.5	0.68	-0.49	0.38		-0.54	-2.83	-0.04
A15	AVOD	-0.68	-8.28	-3.47	-9.81		-0.33	-5.95	1.34	10.37		0.43	10.59	0.47	-0.49		0.69	-10.23	4.54	1.35		0.69	-3.65	2.55	1.48		-0.7	-27.72	-0.81	0.3		0.02	2.19	0.2	0.07		0.1	10.24	-0.08	-0.07		0.34	8.51	-0.09	-0.55		-0.59	20.36	-1.53
A16	AYGAZ	0.62	8.86	-0.01	-0.08		-1.5	0.51	0.21	0.26		0.88	3.93	0.25	0.06		0.44	4.18	-0.13	-0.03		0.51	1.61	0.58	0.46		-2.22	-21.83	-0.35	-0.45		0.73	2.63	0.06	0.02		0.75	2.71	0.34	0.16		0.69	5.22	-0.21	-0.08		-1.86	-8.65	0.001
A17	BAGFS	0.1	4.47	-0.47	0.52		-0.25	7.94	0.29	-0.89		0.31	23.42	-0.03	0.37		-0.05	-24.07	0.38	0.13		0.18	-6.2	0.69	1.38		-0.56	-21.89	-0.48	-1.85		0.06	-1.53	0.68	0.45		0.44	12.29	0.27	0.85		0.13	7.45	0.13	1.77		0.45	29.86	0.02
A18	BAKAB	-0.17	2.25	-0.27	-2.16		-1.07	-11.3	0.36	2.61		0.82	4.88	0.77	0.21		0.65	1.51	0.83	0.34		0.34	5.81	0.39	0.44		-0.88	-5.09	-0.12	-0.31		0.35	0.68	0.23	0.13		0.45	1.5	0.13	0.23		0.3	2.29	0.11	0.46		-1	-17.11	-0.06
A19	BANVT	0.62	14.91	0.59	-1.48		-0.81	18.38	0.12	2.43		0.93	-10.09	2.92	0.67		0.28	-5.19	0.02	-0.12		0.63	-1.48	0.75	0.34		-1.93	-13.25	-0.21	-0.03		0.38	-5.76	0.03	0.01		0.62	3.13	0.05	-0.1		1.05	14.63	0.24	0.1		-1.8	-12.97	-0.1
A20	BFREN	-5.4	11.8	-2.25	-17.13		7.82	-13.41	-14.45	16.27		0.65	6.19	10.96	-1.95		17.39	13.9	20.21	6.82		1.89	5.99	8.08	1.75		-4.6	-31.97	-4.44	4.85		2.1	7.22	2.73	0.48		3.61	0.11	1.54	-0.14		0.24	18.4	1.44	-2.98		-3.88	-32.89	-0.63
A21	BLCYT	13.42	10.83	1.28	-4.19		10.64	-9.16	3.35	10.76		0.37	6.26	0.29	0.28		2.22	6.78	0.03	-0.55		0.18	-0.43	0.43	1.39		0.32	-35.89	0.43	0.42		2.03	16.85	0.27	0.42		1.24	8.39	0.34	0.86		0.38	9.91	-0.05	1.59		-0.76	-25.13	0.09
A22	BNTAS	1.98	5.14	0.23	-0.41		0.001	-5.7	-0.2	1.24		1	-0.71	0.08	0.15		-1.26	6.05	-0.19	-0.74		1.5	2.94	0.52	0.57		-0.41	-7.3	0.14	0.81		1.81	3.79	0.24	0.4		0.88	1.66	0.18	0.65		0.08	2.98	-0.04	0.91		0.85	-5.73	0.3
A23	BOSSA	0.71	14.11	-0.09	-2.2		-0.18	-5.01	1.16	3.75		0.8	23.12	0.41	0.29		0.25	-1.41	0.49	0.15		0.19	-9.69	1.22	0.95		-0.96	-27.66	-0.32	-0.59		0.4	7.99	0.67	0.36		0.44	14.72	0.05	0.4		0.21	4.74	-0.21	0.78		-0.62	-39.89	0.07
A24	BRISA	-0.03	10.68	-1.62	-2.01		-0.45	-18.85	1.27	2.35		0.78	12.57	1.19	0.39		0.31	15.23	-0.83	-0.27		0.36	2.08	1.66	1.2		-0.7	-5.05	-1.02	-0.76		0.23	4.4	1.12	0.49		0.25	6.51	0.16	0.51		0.1	2.06	-0.23	0.78		-0.63	-10.66	0.08
A25	BRKO	-0.22	-0.16	-0.07	-4.36		-0.09	-9.81	0.61	6.64		0.44	-2.14	-0.2	-1.74		0.81	4.81	0.68	4.52		0.24	-4.98	0.43	8.35		0.08	13	-0.09	-8.13		-0.09	-5.48	0.05	1.53		-0.07	-6.88	0.09	3.65		0.01	1.02	0.001	10.54		-0.1	4.96	-0.07
A26	BRKSN	-0.69	0.95	-0.75	-2.68		-0.96	-20.72	-0.37	2.95		1.29	6.83	1.29	0.2		0.76	17.68	0.66	0.06		0.7	0.13	1.05	0.54		-0.83	7.03	-0.13	0.24		0.37	0.2	0.38	0.15		0.43	-3.36	0.36	0.27		0.14	-1.39	-0.17	-0.04		-1.03	-3.42	0.02
A27	BRSAN	0.05	1.7	-0.21	0.53		-0.39	2.08	-0.14	-1.1		0.42	2.44	0.51	0.9		0.11	-2.08	0.1	0.35		0.16	-1.19	0.17	1.34		-0.65	-1.75	-0.23	-2.31		0.14	0.61	0.1	0.29		0.17	-1.14	0.09	0.52		0.19	2.33	-0.11	1.04		-0.65	-9.75	0.08
A28	BTCIM	-0.21	-37.84	-0.88	-2.87		0.59	86.09	8.08	4.75		0.12	11.53	0.33	0.54		-0.18	-88	0.9	1.01		-0.01	-23.44	0.57	2.92		-0.15	13.94	-0.22	-3.41		-0.08	-18.89	0.26	0.62		0.13	1.68	0.13	1.09		-0.04	-9.06	-0.01	2.62		-0.32	-4.34	0.001
A29	BUCIM	-0.34	8.83	-0.38	-1.21		0.87	-12.82	0.54	1.52		0.52	5.35	-0.44	-0.32		0.62	9.46	0.5	0.51		0.33	3.86	0.33	0.8		-1.21	-5.09	-0.32	-0.96		0.45	1.36	0.26	0.18		1.83	-1.22	1.01	1.17		-0.97	3.31	-0.91	-0.3		-1.74	-27.9	0.001
A30	BURCE	-0.03	2.19	-0.37	-5.86		-0.33	-6.84	0.42	6.63		0.13	-1.22	0.01	-0.44		1.16	10.36	1.34	2.39		0.18	-1.69	0.53	4.04		-0.37	0.92	-0.05	-4.35		0.18	4.31	-0.32	-0.23		0.21	-2.92	0.27	0.5		0.04	0.73	-0.06	1.38		-0.65	-6.92	0.001
A31	BURVA	-3.88	-9.79	-7.05	-45.51		-7.19	-4.92	-21.32	62.69		6.87	-6.58	-6.38	-5.13		6.44	22.27	35.19	-26.85		0.57	-4.79	12.47	-9.82		-0.45	-4.52	4.72	47.11		2.08	2.36	4.57	2.22		1.46	-0.03	4.43	2.35		0.12	0.07	-0.01	-0.49		-1.33	-6.36	0.15
A32	CASA	0.07	15.52	-0.71	-1.07		-0.39	-4.02	0.17	0.7		3.79	26.41	5.07	-1.14		0.59	-15.25	1.53	1.65		0.48	-2.24	1.08	1.74		-0.45	-20.56	-0.03	57.96		0.62	4.31	0.35	185.88		0.16	-2.41	-0.02	-154.94		-0.54	20.35	-0.06	16.69		0.21	11.25	0.12
A33	CCOLA	0.5	9.02	0.46	0.3		-0.87	-12.23	-0.12	0.12		0.54	-0.12	0.83	0.54		0.39	9.61	-0.22	-0.01		0.4	6.22	0.19	1.07		-0.96	-13.02	-0.15	-1.27		0.27	-0.67	0.15	0.13		0.5	9.17	0.06	0.3		0.26	6.69	-0.01	1.3		-0.85	-7.14	-0.09
A34	CELHA	0.28	6.79	-1.26	-1.29		-0.4	27.43	0.25	1.59		0.35	40.94	-4.49	-0.41		0.31	-21.55	2.68	-0.31		0.3	-41.05	4.22	0.21		-0.85	19.01	0.64	0.64		0.15	-22.72	1.43	0.11		0.36	1.79	0.15	-0.01		0.29	-2.6	-0.52	-0.43		-1.78	-41.11	0.34
A35	CEMAS	0.92	1.4	-0.07	-1.16		1.27	2.34	-0.75	-0.8		-0.46	-11.93	0.12	-0.28		0.52	6.68	0.11	-0.35		3.04	11.72	0.72	3.39		1.25	17.01	-1.77	-1.68		-0.3	-36.23	0.8	0.43		0.57	3.74	0.82	1.44		0.14	8.16	-0.18	0.47		0.01	33.68	-0.15
A36	CEMTS	0.44	8.09	-0.57	-2.13		-3.02	-17.73	-0.15	1.93		3.83	6.86	-0.04	-0.58		-0.21	8.36	1.06	0.82		3.41	4.92	0.49	0.59		-3.81	-8.65	-0.57	-0.05		2.29	2.79	0.52	0.29		0.95	-0.39	0.12	0.07		1.31	4.94	-0.15	-0.56		-2.73	-29.59	-0.16
A37	CIMSA	0.9	20.07	0.15	0.18		-0.08	-1.51	0.08	0.18		0.12	2.51	0.21	0.29		0.29	6.77	0.37	0.98		0.33	3.39	0.32	2.73		-0.49	0.09	-0.26	-3.2		0.14	-1.8	0.16	0.43		0.27	0.01	0.11	0.55		0.04	-0.16	-0.06	2.44		-0.57	-10.74	-0.1
A38	CMBTN	-0.35	3.78	-6.14	-4.48		-0.73	32.02	1.53	4.2		1.42	5.98	8.94	0.8		0.66	-18.17	4.06	0.45		0.52	-10.8	1.66	0.8		-1.47	-5.99	-0.37	-0.23		0.2	1.52	0.46	0.1		0.36	-3.09	0.17	0.07		0.16	-4.84	-0.11	-0.12		-1.88	-19.64	0.06
A39	CMENT	-0.7	3.08	-1.15	-5.15		-0.65	3.56	0.28	4.87		0.55	8.02	-0.03	-0.58		0.89	-1.85	1.15	0.34		1	-7.6	1.32	4.05		-0.93	6.23	-0.35	-2.08		0.35	-1.26	0.31	0.54		-0.52	-2.91	-0.4	-0.71		-0.14	-3.01	0.01	-0.16		0.28	-2.1	0.38
A40	CUSAN	0.74	18.86	0.15	-1.2		-1.35	-6.4	-0.49	1.1		0.52	5.11	0.41	-0.03		0.54	6.37	0.82	0.49		0.63	-0.39	0.56	0.51		-1.14	-4.64	-0.38	-0.18		0.57	-0.66	0.37	0.17		0.62	0.94	0.22	0.2		0.43	5.38	-0.04	0.2		-0.58	3.18	0.04
A41	DAGI	0.99	-0.78	0.29	0.33		-0.48	-9.08	-0.53	0.08		-0.86	-4.02	-2.27	-3.67		1.29	7.39	1.71	1.8		1.01	6.7	1.72	5.11		-0.87	-10.51	-0.21	-1.93		0.27	2	0.26	0.23		0.76	2.29	0.8	1.25		-0.06	1.61	-0.6	0.49		-0.92	7.57	0.04
A42	DERIM	-0.03	-6.08	-0.36	-1.88		-0.45	7.98	0.64	2.64		0.3	-4.99	0.63	0.001		0.22	-2.12	0.4	-0.1		0.28	-1.15	0.95	0.59		-0.75	9	-0.81	-0.08		0.53	11.65	-0.29	0.14		0.42	-10.23	2.78	0.93		-0.02	-11.88	-1.13	0.13		-0.56	4.05	-0.02
A43	DESA	-0.23	1.08	-1.73	-6.34		-0.4	-1.82	1.39	7.59		0.69	1.64	1.59	0.38		0.62	5.43	0.62	-0.22		0.19	-6.42	1.05	0.76		-1.28	-18.37	-0.57	0.13		0.67	2.69	1.05	0.29		0.3	8.43	-0.2	0.12		0.43	2.75	0.41	0.68		-1.29	-5.51	-0.01
A44	DEVA	-0.63	8.76	-0.86	-4.59		-0.32	-27.87	0.31	5.18		0.45	6.9	0.38	0.05		0.35	10.41	-0.48	-0.97		1.07	8.99	1.3	1.39		-0.61	-14.19	0.01	0.74		0.5	6.62	0.26	0.06		0.41	5.57	0.23	0.25		0.38	7.54	0.18	0.88		-0.52	-10.25	0.19
A45	DITAS	1.07	10.7	0.19	-2.35		1.85	3.04	2.35	5.12		-1.03	16.83	-7.46	-2.27		1.51	12.61	4.41	0.36		0.75	-3.08	2.98	0.34		-1.26	-12.97	0.87	1.72		0.63	-6.03	1.63	0.36		0.4	3.01	0.08	0.03		0.34	3.07	-0.16	-0.22		-1.47	-21.53	0.22
A46	DMSAS	0.29	7.47	-0.1	-0.55		-0.85	-7.24	0.08	0.83		0.49	11.76	-0.26	-0.18		0.38	7.71	0.49	0.3		0.54	-6.43	1.14	0.97		-1.33	-14.81	-0.37	-0.73		0.58	3.77	0.36	0.08		0.36	-0.28	-0.07	0.05		0.19	3.93	-0.11	0.14		-1.11	-24.6	0.19
A47	DOBUR	1.32	7.79	2.3	-7		-1.95	37.2	-6.95	10.95		2.32	-9.68	6.14	-1.63		2.34	4.8	5.54	-0.19		3.25	-11.5	10.51	6.19		-1.87	4.22	-2.16	1.33		1.21	-3.37	2.69	0.61		0.24	-8.17	0.3	-0.07		0.52	-1.95	0.38	-0.03		-2.21	-7.75	-0.3
A48	DOGUB	-0.34	2.89	-0.08	-28.43		1.26	10.46	1.24	39.18		-0.8	-0.36	1.06	-6.68		2.06	0.14	1.56	-11.8		2.35	-4.49	2.03	-17.15		-2.82	8.55	-0.52	41.65		-0.11	-0.37	0.44	1.52		2.18	-1.11	0.74	0.55		4.31	1.66	-2.07	-35.02		-0.99	10.81	-1.41
A49	DOKTA	0.45	15.59	-2.34	-2.72		-0.52	-16.6	-5.55	2.38		0.38	42.18	-10.45	-1.37		0.11	9.33	-6.53	-0.91		0.46	-7.39	12.96	1.21		-1.81	-120.05	-21.73	0.67		0.96	75.43	32.43	1.24		0.94	7.26	4.87	0.7		0.46	13.8	1.28	0.73		-0.82	-59.65	-0.42
A50	DURDO	0.34	13.45	0.39	-0.74		-0.33	12.89	0.85	1.56		0.39	29.65	-3.27	-0.61		0.22	-23.81	3.39	0.29		-0.03	-11.57	0.29	-0.64		-1.04	-23	1.07	1.27		0.47	0.65	1.02	0.28		0.67	10.1	0.91	0.48		0.26	4.36	-0.15	0.29		-0.92	-23.83	0.17
A51	DYOBY	0.27	4.67	-1.05	-1.29		-1.7	-37.04	0.55	1.31		0.95	14.11	0.18	0.05		0.63	14.24	0.57	0.08		0.48	14.82	0.84	0.37		-1.04	-9.84	-0.45	-0.1		0.48	-2.64	-0.1	0.01		0.3	-0.94	0.59	0.11		0.24	10.41	-0.12	0.18		-0.77	33.42	0.02
A52	EGEEN	-2.99	10.4	-2.84	-18.23		1.86	-20.66	0.46	16.44		5.73	5.66	4.14	4.42		0.59	13.31	-0.07	-2.27		1.29	10.04	1.48	4.22		-2.93	-28.3	-0.56	1.96		1.2	4.35	0.37	0.14		0.69	5.13	-0.27	-0.53		0.1	13.91	0.5	-1.14		-0.93	-44.38	0.28
A53	EGGUB	-0.08	9.91	-1.61	-4.07		-0.37	-22.1	1.33	5.16		0.46	5.17	0.21	-0.16		1.58	9.73	1.44	0.42		1.06	6.9	1.48	0.82		-1.17	-8.72	-0.62	0.02		-0.78	1.31	0.63	0.11		1.05	6.6	0.39	0.17		0.51	8.35	0.02	-0.06		-0.82	-10.87	0.06
A54	EGPRO	0.13	9.86	-0.71	-2.66		-1.34	-16.08	-0.88	2.16		1.34	13.41	0.6	0.33		0.45	5.52	1.15	0.17		0.37	-0.6	0.98	0.71		-0.82	-4.89	-0.52	0.07		0.35	4.58	0.41	0.09		0.4	4.32	-0.04	-0.17		0.07	1.29	-0.57	-1.58		-0.9	-26.11	0.81
A55	EGSER	0.12	12.15	0.01	-1.81		-0.59	-13.64	0.35	2.42		1.12	8.86	0.5	0.3		0.68	7.6	0.21	0.18		0.56	3.56	0.41	1.17		-1.06	-4.64	-0.13	-0.95		0.45	3.97	0.11	0.21		1.06	0.78	0.74	1.37		-0.97	1.82	-0.74	-0.53		-1.21	-17.25	-0.02
A56	EKIZ	0.52	42.17	-2.19	-0.99		-0.65	-21.43	0.73	0.77		0.4	44.25	-4.24	-1.3		-0.09	-46.62	1.37	-4.92		1	-0.26	6.48	8.4		-1	-28.98	0.63	-1.42		0.78	64.44	-0.17	0.04		0.41	28.06	0.11	0.23		0.18	-40.78	0.16	1.94		-0.66	46.77	-0.01
A57	EMKEL	0.47	5.02	-0.11	-1.51		-0.05	8.33	-1.47	1.57		0.4	1.66	1.22	0.45		0.06	-5.06	0.59	0.42		0.25	0.3	0.83	1.74		-0.24	4.24	-0.15	-1.83		0.17	6.61	0.09	0.32		0.1	-4.08	0.33	0.63		0.14	6.16	-0.19	2.46		-0.01	44.95	-0.06
A58	EPLAS	-0.6	2.47	-1.87	-4.65		-2.79	-44.88	0.31	4.37		1.19	15.45	0.87	0.51		0.35	12.03	-0.1	-0.55		1.14	6.11	1.17	0.08		-0.18	16.76	-1.16	0.98		0.79	-0.59	2.17	0.69		0.76	2.15	0.05	0		0.47	2.17	0.27	0.29		-2.05	-80.85	0.09
A59	ERBOS	2.63	8.42	1.7	0.08		-0.75	-8.63	0.7	2.73		0.77	6.27	0.04	-0.08		1.11	4.81	0.39	0.23		0.96	2.97	0.32	0.6		-1.22	-16.59	-0.6	-0.47		-0.22	1.3	0.32	0.14		0.88	3.15	0.28	0.21		0.13	8.47	-0.14	-0.19		-1.11	-18.26	-0.07
A60	EREGL	0.36	6.58	0.001	-0.18		-0.95	-2.21	-0.01	0.11		1.22	4.97	0.49	0.87		0.23	1.25	0.001	0.29		0.18	1.64	0.03	1.28		-1.06	-10.57	-0.25	-2.12		0.33	0.26	0.21	0.34		1.24	2.77	0.83	1.86		-0.68	4.59	-1.2	-2.33		-1.29	-16.69	0.31
A61	ERSU	-4.21	-0.57	-2.29	-38.06		0.64	-2	-0.1	36.08		-2.24	0.29	-0.61	-7.52		1.12	0.51	0.89	0.48		2.6	0.43	0.9	0.11		3.08	-6.87	1.26	11.79		1.08	-6.47	0.52	2.96		0.73	6.97	0.42	3.42		-0.14	6.03	0.08	1.97		-0.27	0.31	-0.09
A62	FMIZP	-20.4	16.14	-23.66	-36.31		-5.79	-20.96	22.48	33.5		-0.39	9.53	-7.63	-17.32		19.24	11.6	19.83	16.23		30.56	7.37	2.37	-1.31		-16.04	-28.09	4.46	16.4		27.21	8.71	6.69	3.3		16.56	7.16	5.25	3.18		-12.44	16.02	-6.29	-8.76		-17.62	-34.57	1.88
A63	FORMT	2.41	-0.57	-0.72	-0.18		-1.78	-8.12	-3.99	-1.27		0.63	8.37	0.82	-0.62		0.4	13.42	0.51	-0.5		0.46	-7.93	1.96	0.5		-0.62	27.29	-1.18	0.92		-2.19	-28.62	-1.71	-4.74		3.47	0.42	5.63	9.56		-3.13	0.33	-5.44	-29		1.86	-14.06	4.45
A64	FRIGO	-0.57	8.61	-4.2	-9.84		0.13	-35.11	3.69	10.76		-2.81	16.29	-2.49	-1.07		2.61	4.6	3.71	1.63		1.77	4.99	1.43	0.88		-1.09	-29.4	-0.86	-0.29		-0.05	8.66	0.78	0.33		1.22	5.91	1.69	1.01		0.4	13.73	-0.5	0.33		-0.49	-10.09	0.001
A65	FROTO	0.79	10.33	-2.85	-1.73		-1.33	-29.47	4.93	2.82		1.55	12.04	-0.15	-0.07		0.62	25.59	0.43	-0.39		0.6	6.25	1.7	0.06		-2.56	-26.33	-1.03	0.61		0.77	12.92	0.82	-0.06		0.8	6.61	-1.04	-0.34		0.99	8.78	0.65	-0.39		-2.51	-29.54	0.39
A66	GEDZA	-0.34	7.59	-0.55	-5.72		-0.18	-19.15	0.64	7.9		1.26	7.66	0.96	0.5		0.25	9.99	0.68	0.57		1.45	5.95	0.5	0.79		-0.75	-12.39	0.08	0.31		0.1	3.96	0.1	0.1		0.72	4.05	0.08	0.18		0.37	6.84	0.13	0.63		-0.9	-21.21	0.03
A67	GENTS	-1.35	6.75	-0.73	-2.2		-1.72	-22.06	-0.43	1.74		2.12	8.79	1.33	0.75		0.71	11.25	0.03	-0.16		0.72	3.03	0.5	0.74		-0.98	-0.81	-0.17	-0.29		0.93	-1.13	0.48	0.32		0.6	2.61	0.08	0.26		0.02	3.9	-0.14	0.32		-1.39	-20.92	0.06
A68	GEREL	-0.14	1.21	-0.73	-2.8		-0.66	-0.17	-0.31	3.14		0.05	3.51	-0.01	-0.76		0.2	0.4	0.35	-0.76		1.44	2.83	2.53	2.26		-0.41	32.16	-0.68	-0.08		0.16	-3.86	0.77	0.41		0.22	-10.93	0.35	0.33		-0.16	-12.05	0.12	0.55		-1.26	-6.94	-0.24
A69	GOLTS	-0.19	-0.49	-1.13	-2.11		-0.26	-3.29	0.94	2.08		0.4	3.41	0.89	0.45		0.19	-1.17	0.39	0.47		0.28	-1.28	0.4	1.76		-0.62	-10.69	-0.38	-1.92		0.13	2.49	0.24	0.17		0.22	2.98	0.15	0.53		0.17	-0.85	0.04	1.06		-0.41	7.41	-0.17
A70	GOODY	0.55	8.88	-0.22	-0.55		-1.9	-7.42	-0.09	0.6		1.1	4.58	0.69	0.18		0.38	10.06	-0.16	-0.24		1.39	-3.01	0.62	0.54		-2.81	-27.15	-0.21	-0.17		1.96	21.05	0.09	0.04		0.86	4.46	1.12	0.52		0.02	5.34	-1.4	-0.73		-1.7	-20.17	-0.02
A71	GUBRF	-1.62	5.48	-8.68	-5.97		-1.19	-31.5	-8.51	4.45		3.36	-12.62	7.72	2.42		0.41	12.55	2.72	-0.53		1.27	15.97	7.44	0.84		0.01	40.41	3.29	1.78		0.29	-18.01	2.58	0.31		0.4	-0.16	1.64	0.37		0.23	0.19	0.15	0.3		-0.89	-17.68	-0.07
A72	HATEK	0.19	3.26	-0.23	-1.25		0.08	-5.32	0.41	1.36		0.5	5.77	0.05	0.19		0.32	0.77	0.23	1.19		0.24	0.44	0.15	3.13		-0.63	-10.95	0.02	-3.84		0.58	10.04	0.04	0.06		0.21	0.61	-0.04	0.66		0.001	-1.07	0.09	2.29		-0.6	-6.51	-0.01
A73	HEKTS	0.27	-0.99	-3.08	-7.39		-0.26	-17.34	2.68	10.2		0.5	6.75	1.7	0.57		-0.24	6.4	-1.06	-2.43		-0.17	2.02	1.59	0.08		-0.29	-16.84	0.4	3.89		0.78	-6.06	-0.15	0.1		1.01	3.84	3.75	2.25		-0.46	6.38	-2.9	-2.56		-0.86	-18.03	0.08
A74	HURGZ	0.01	-6.45	0.64	-0.03		-0.51	10.63	-0.2	2.93		-0.38	-4.14	-0.24	-1.15		0.84	-0.92	0.84	1.93		0.47	-3.14	0.51	3.27		-0.54	2.96	-0.2	-2.26		0.51	3.79	0.19	0.43		0.09	-7.21	0.12	0.73		-0.1	-3.4	-0.05	1.05		-1.8	-42.69	-0.09
A75	IHEVA	-0.63	3.44	-0.34	-0.71		-2.96	-7.49	-0.39	-0.3		-0.3	5.28	-0.32	-0.76		2.04	1.44	-0.16	-1.15		-0.22	1.71	0.1	-2.08		-4.32	-10.58	-0.86	1.54		4.46	3.42	1.3	2		3.01	4.26	0.47	1.17		0.34	-0.03	0.22	0.96		0.1	-0.4	0.45
A76	IHGZT	5.63	0.56	-0.32	-1.52		-4.4	7.07	-1.59	-2.12		-3.24	1.74	-2.1	-6.15		7.01	-2.16	3.66	8.63		-3.35	-2.63	-0.97	-7.49		-3.16	-12.45	-0.69	4.7		6.36	6.93	1.82	3.36		0.89	1.26	0.37	1.28		1	-0.79	0.46	4.67		-0.13	2.42	0.07
A77	ISDMR	-0.16	7.61	-0.21	-1.3		-0.82	-6.22	0.25	1.4		1.59	6.14	0.38	0.64		-0.02	1.4	-0.14	-0.21		0.23	2.31	0.08	0.47		-1.75	-12.14	-0.42	-0.96		0.54	0.83	0.26	0.25		2.51	2.69	1.17	2.07		-0.8	5.99	-1.51	-3.16		-2.04	-22.32	0.47
A78	JANTS	-1.44	16.03	-8.02	-22.58		-0.14	-27.11	11.38	27.55		5.71	7.47	2.68	0.58		5.01	12.39	4.26	2.58		1.31	10.29	0.45	-0.7		-2.76	-18.81	0.08	1.63		1.33	3.12	0.51	0.16		2.47	7.18	1.87	1.47		-0.6	11.37	-1.32	-1.44		-1.62	-19.42	-0.11
A79	KAPLM	-0.39	10.29	-4	-4.53		-1.08	-5.14	-1.49	3.93		1.49	4.8	6.28	1.01		0.87	3.18	2.42	0.2		0.6	0.79	1.67	0.51		-0.67	12.55	-0.21	0.63		0.4	5.8	0.32	0.02		0.3	-11.67	0.71	0.2		0.23	-0.21	0.08	0.05		-1.22	-13.3	-0.16
A80	KARSN	-0.19	-4.51	-0.24	-8.04		-0.57	-5.37	0.93	10.66		0.44	2.55	-0.19	-0.31		0.21	1.41	0.2	-1.15		0.61	0.48	2.27	2.41		-0.66	-4.64	-0.42	-0.26		0.48	-0.64	0.88	0.51		0.2	1.29	-0.85	0.01		0.25	12.7	-0.82	0.01		-0.49	-3.18	0.58
A81	KARTN	-7.42	8.88	-2.44	-10.62		-16.73	-15.75	-4.13	8.01		25.05	5.85	8.72	4.99		4.23	7.8	1.15	0.44		1.6	6	0.62	-0.42		-3.28	-13.55	-0.43	1.44		1.2	4.16	0.22	-0.04		0.91	2.54	0.09	-0.28		-0.29	5.28	-0.14	-1.65		-1.94	-21.99	-0.01
A82	KATMR	0.02	-3.53	0.6	0.6		-0.22	5.63	0.86	0.21		0.39	25.87	1.19	2.08		-0.08	-16.43	-2.57	0.21		0.14	-9.85	2.29	4.66		-0.33	-3.2	-0.68	-5.97		0.02	-14.44	0.75	0.58		0.25	13.03	0.03	1.42		0.41	-3.77	-0.41	-1		-0.18	13.81	0.26
A83	KENT	-26.26	5.07	-39.38	-129.84		-36.06	-13.44	-10.06	115.75		-1.84	4.45	0.76	-15.71		87.19	0.73	68.3	56.47		9.77	6.74	17.34	7.72		-2.59	2.34	-0.67	9.49		3.42	1.61	3.44	0.64		0.22	0.6	-0.24	-1.92		0.02	2.26	0.14	-6.07		-2.43	-11.81	-0.13
A84	KERVT	0.1	4.09	-0.76	-1.25		-1.34	-35.94	-0.59	0.92		0.76	24.98	-0.86	-0.12		0.41	7.46	0.71	0.2		0.41	2.08	0.87	0.39		-0.79	-18.63	0.04	0.14		0.63	3.01	0.63	0.67		0.38	6.29	0.56	0.56		0.36	6.34	0.14	1.03		-0.56	10.96	-0.46
A85	KLMSN	0.23	8.75	-0.3	0.45		-0.65	-8.78	0.37	-0.41		0.38	12.11	-0.01	0.04		0.14	0.65	-0.2	-0.09		0.39	6.83	0.49	0.83		-1.48	-40.8	-1.05	-1.19		0.36	2.21	1.33	0.33		0.43	3.63	0.21	0.18		0.44	16.07	0.13	0.68		-0.67	-15.26	0.32
A86	KNFRT	-0.01	4.79	-0.77	-4.43		-0.45	-12.04	0.31	5.23		-0.45	2.21	-0.55	-0.85		0.57	0.7	1.79	1.05		0.94	7.74	0.55	0.09		-0.67	-9.11	-0.22	0.5		-1.64	-3.32	0.06	-0.11		2.3	0.93	1.83	2.07		-0.34	7.8	-1.2	-1.77		-0.81	-20.19	-0.13
A87	KONYA	-9.56	-0.35	-2.84	-36.24		-3.27	-5.59	-0.44	37.64		11.93	0.52	7.34	4.14		7.99	6.45	3.71	2.5		1.72	0.13	1.4	-3.64		-4.54	-2.31	-1.25	7.44		1.28	0.68	0.78	0.13		2.14	1.27	0.45	-0.83		-0.07	-0.51	-0.05	-5.93		-0.13	-11.26	0.12
A88	KORDS	0.28	6.91	-0.13	0.22		-0.24	-0.99	0.43	-0.08		0.41	2.29	0.32	0.51		0.24	0.35	-0.18	-0.36		-0.02	0.44	0.21	1.74		-0.84	-14.09	-0.31	-1.95		0.11	2.62	-0.04	0.09		0.1	3.69	0.04	-0.03		0.29	4.85	0.09	0.58		-0.81	-12.77	0.001
A89	KRDMA	0.49	15.89	-0.24	-0.2		-0.28	9.83	-0.14	0.09		0.37	13	-0.24	-0.15		0.31	-3.99	0.65	0.51		0.32	-3.11	0.74	2.02		-0.72	-6.43	-0.19	-1.81		0.1	-2.96	0.19	0.32		0.13	0.9	-0.01	0.31		0.22	2.51	-0.04	0.96		-0.93	-18.29	0.13
A90	KRDMB	0.47	15.89	-0.31	-0.3		-0.19	9.83	0.12	0.28		0.52	13	0.25	0.21		0.17	-3.99	0.21	0.32		0.24	-3.11	0.5	1.76		-0.72	-6.43	-0.2	-1.82		0.1	-2.96	0.19	0.32		0.13	0.9	-0.01	0.3		0.22	2.51	-0.04	0.98		-0.94	-18.29	0.13
A91	KRDMD	0.46	15.89	-0.34	-0.47		-0.18	9.83	0.14	0.48		0.62	13	0.57	0.41		0.14	-3.99	0.09	0.25		0.22	-3.11	0.45	1.71		-0.72	-6.43	-0.2	-1.82		0.09	-2.96	0.17	0.3		0.13	0.9	-0.01	0.29		0.22	2.51	-0.04	0.96		-0.98	-18.29	0.05
A92	KRSTL	-0.99	0.79	-0.09	-1.65		-3.42	-2.97	-0.79	1.58		3.59	0.43	0.99	0.67		0.08	1.26	0.04	-0.34		1.27	0.79	0.67	1.15		-1.05	0.64	-0.19	-0.37		0.83	0.36	0.23	0.25		0.51	0.91	0.26	0.51		0.03	-1.14	0.07	1.28		0.28	13.14	-0.75
A93	KRTEK	-0.29	6.1	-2.31	-3.37		0	-11	2.25	3.44		0.27	-3.24	-0.72	0.1		0.36	10	0.76	0.56		0.14	1.15	0.93	1.68		-0.67	0.4	-0.74	-2.16		-0.05	-9.76	0.81	0.57		0.42	10.59	0.25	0.34		0.23	4.04	0.06	0.83		-0.51	-17.65	-0.02
A94	KUTPO	-0.43	1.48	0.25	-7.31		-0.82	-7.07	0.29	10.25		3.67	4.11	2.08	0.98		-1.47	1.93	-0.68	-3.44		5.35	3.16	3.18	8.2		-0.99	-12.08	0.01	-1.27		0.47	4.71	0.1	0.14		0.61	0.66	0.07	0.33		0.27	4.09	0.06	0.84		-1.36	-9.15	-0.06
A95	LUKSK	-1.49	5.56	-3.29	-17		2.17	-1.6	4.55	20.69		0.53	13.99	-0.72	-0.77		0.74	-3.72	1.76	1.93		0.45	-3.17	0.97	3.65		-0.77	-12.44	-0.14	-2.77		0.34	1.05	0.27	0.53		0.37	4.07	0.2	0.95		0.17	4.71	-0.08	1.18		-0.32	3	-0.03
A96	MAKTK	-0.72	3.53	-1.74	-19.49		-2.49	-2.26	0.85	21.45		2.37	1.3	1.53	0.52		0.35	2.39	-0.05	-3.48		1.14	-2.11	1.77	4.11		-2.42	-5.13	-1.1	2.04		-0.16	-2.37	-0.28	-0.56		0.89	3.72	0.17	-1.17		1.03	1.47	0.09	-4.24		-1.9	-8.35	-0.86
A97	MNDRS	0.02	3.14	-0.42	1.09		-0.52	3.13	0.09	-1.78		0.31	150.6	-44.82	-0.39		0.12	-23.55	36.24	-0.03		0.35	-76.49	7.22	1.23		-0.94	-54.59	0.79	-1.06		0.24	-14.46	0.92	0.19		0.47	25.96	-0.02	0.36		0.11	-11.41	0.07	1.18		-0.51	23.89	0.001
A98	MRSHL	-1.53	-36.99	5.43	-10.94		-2.39	0.82	-8.18	10.8		0.7	0.82	-10.53	-3.84		3.81	6.6	31.39	6.96		0.48	3.21	3.79	0.07		-1.94	-12.28	-1.04	1.68		1.48	10.5	1.33	0.24		0.5	-5.69	0.99	-0.02		0.19	11.36	0.001	-0.64		-1.14	60.99	-0.51
A99	NIBAS	-10.59	-0.8	-3.94	-86.88		-44.11	6.36	-21.16	16.69		38.01	-8.5	18.27	22.9		14.88	-1.3	8.5	26.5		4.05	0.48	2.03	-13.65		-1.78	-1.67	-0.28	57.61		-5.75	6.59	-6.82	-23.7		2.95	0.2	1.01	-14.99		-1.61	-1.3	1.89	-42.35		4.99	16.65	3.31
A100	NUHCM	-1.31	7.73	-2.66	-13.49		-1.41	-26.49	1.49	13.18		3.99	3.1	2.22	2.13		1.06	6.13	0.35	0.24		0.9	16.97	0.45	1.04		-0.93	-7.98	-0.41	-0.57		1.18	3.45	0.53	0.49		0.55	2.94	0.12	0.24		0.03	5.7	-0.05	0.38		-0.86	-11.76	-0.12
A101	OLMK	0.04	8.26	-0.61	-1.63		-2.05	13.1	-3.46	0.87		0.8	6.04	1.68	-0.12		1.61	-1.29	2.99	0.8		0.17	0.29	0.37	-0.91		0.42	32.25	0.49	2.01		0.23	-12.92	0.95	0.18		0.4	0.01	0.24	0.07		-0.07	-17.32	0.001	-0.03		-0.92	-14.56	0.22
A102	OTKAR	0.16	25.56	-4.94	-5.18		-1.1	-45.66	5.15	6.47		1.14	17.35	3.04	1.1		0.08	15.06	-1.49	-0.72		0.51	24.11	0.62	0.23		-1.77	-50.28	-0.56	0.36		0.36	4.82	0.5	0.23		0.76	10.15	-0.15	-0.2		0.65	43.84	-2.81	-2.16		-0.96	-45.85	3
A103	OYAKC	-0.21	5.85	-0.5	-4.34		-1.15	-10.23	-1.03	4.1		0.39	8.03	0.04	-0.88		0.87	7.61	0.14	-1.93		-0.67	2.24	1.77	-4.63		-4.6	-14.24	-0.39	7.9		2.39	5.41	0.82	0.51		1.28	3.57	0.66	0.69		3.06	-0.01	-0.36	-4.65		-1.31	-8.72	0.39
A104	OYLUM	1.98	4.31	1.55	0.53		-1.12	-3.63	-0.47	1.34		0.09	1.68	-0.23	-0.47		1.02	4.61	1.05	0.76		0.05	2.41	-0.04	-0.99		-0.04	-6.24	-0.48	1.15		0.86	0.78	1.49	0.75		0.85	1.59	1.1	1.24		0.07	1.45	-0.55	0.1		-0.43	2.14	0.03
A105	PARSN	-0.15	3.6	-0.59	-2.11		-0.06	-6.68	0.58	2.41		0.31	8.31	0.02	0.46		0.09	4.3	-0.09	0.06		0.21	-1.35	0.79	4.28		-0.41	0.41	-0.83	-4.71		0.22	-4.08	-0.02	0.16		-0.05	-0.98	-0.18	-0.26		0.33	1.69	0.77	3.03		-0.08	12.54	-0.03
A106	PENGD	-1.29	-0.19	-0.6	-4.42		-0.64	0.21	-0.59	4.21		1.13	4.21	0.03	-0.82		3.14	7.41	2.27	3.89		-0.37	-6.91	-0.55	-1.15		-0.05	0.29	0.58	0.62		-0.07	7.39	-2.33	-0.83		0.41	27.71	-0.45	-0.3		-0.13	-12.39	-0.66	-1.42		-0.79	-29.57	2.38
A107	PETKM	0.54	12.15	-0.1	0.14		-0.39	-3.54	0.07	-0.09		0.41	5.49	-0.05	0.24		0.09	5.87	-0.12	0.06		0.31	2.95	0.49	1.03		-0.85	-15.93	-0.32	-1.31		0.14	1.75	0.07	0.05		0.18	4.32	-0.3	-0.08		0.32	6.27	0.12	0.56		-0.81	-17.06	-0.26
A108	PETUN	0.1	3.02	-0.25	-0.68		-1.37	-9.96	-0.06	0.35		0.22	2.71	-0.3	-0.35		0.51	2.99	0.39	0.28		0.91	2.59	0.51	1.49		-1.05	-3.15	0.08	-0.89		0.51	1.2	0.07	0.11		0.5	3.32	0.07	0.4		0.31	2.13	-0.09	0.76		-0.99	-10.81	0.16
A109	PINSU	-0.04	-39.06	2.03	-1.81		-0.19	25.21	1.28	2.91		-0.12	28.05	-7.91	-0.69		0.36	10.64	2.66	0.001		0.22	-45.6	5.31	1.21		-0.41	22.73	1.9	0.45		0.14	-20.27	0.49	0.06		0.29	-5.52	0.32	0.1		0.1	-21.37	0.16	0.7		-0.62	18.03	0.17
A110	PNSUT	0.17	0.26	-0.14	0.22		-0.92	-0.73	-0.12	-0.52		0.32	0.13	0.06	0.09		0.28	0.51	0.09	0.19		0.4	0.16	0.22	0.74		-0.86	-0.87	-0.02	-0.8		0.4	1.48	0.11	0.09		0.42	0.1	0.13	0.37		0.3	0.04	0.01	0.85		-0.86	-4.06	0.001
A111	PRKAB	0.67	1.87	1.72	-1.49		-2.16	-8.1	-0.48	2.36		0.97	2.28	1	-0.22		1.05	3.08	2.57	0.51		0.98	2.53	1.11	0.16		-1.31	-7.09	0.3	0.65		0.5	2.72	0.38	0.1		0.83	1.97	0.24	0.08		0.41	1.87	-0.12	-0.05		-1.07	-11.16	0.09
A112	PRZMA	-1.52	0.26	-0.6	-3.75		-0.59	-13.63	-0.13	1.73		2.45	14.74	0.08	0.35		-6.34	0.65	0.02	-19.97		-2.53	-0.37	-0.18	-18.59		3.22	-0.08	0.21	37.06		0.76	2.03	-0.25	-6.05		3.86	2.13	1.45	9.69		0.33	-0.35	0.25	3.92		-1.14	-2.36	0.05
A113	RTALB	-1.56	17.56	-2.6	-13.04		-3.75	-35.84	-1.07	13.15		-9.06	9.5	-5.81	-9.86		1.04	7.9	2.46	-2.31		12.96	23.67	9.2	11.11		0.76	5.82	1.44	6.08		-1.8	-1.52	0.32	2.04		3.32	-1.88	0.18	1.76		-0.52	5.54	-0.06	0.93		0.63	3.71	-0.18
A114	SAMAT	-0.89	-43.43	-0.2	-8.17		-2.53	-18.91	-3	8.96		2.25	9.97	5	1.22		0.53	1.74	0.99	-0.16		1.18	-2.4	1.01	1.51		-0.6	146.32	-0.56	0.15		0.09	-124.25	2.39	0.24		0.47	-7.02	0.07	0.38		0.19	-9.86	0.25	1.74		-1.01	-1.54	-0.09
A115	SANFM	0.73	14.11	2.17	-1.08		-0.59	-16.35	0.72	3.5		0.54	20.14	1.14	0.23		0.49	-0.4	1.4	0.29		0.33	0.72	0.68	-0.27		-1.02	-14.42	-0.3	0.59		0.73	13.06	1.8	0.38		0.41	4.62	0.3	0.04		0.25	-0.26	-0.02	0.3		-0.86	-3.51	0.43
A116	SARKY	0.85	14.73	-0.56	-0.63		-1.56	-18.44	0.94	0.77		0.86	10.1	0.44	0.06		0.76	13.31	1.26	0.28		0.55	3.17	-0.11	-0.01		-2.01	-12.13	-0.07	-0.14		0.64	0.57	0.42	0.04		0.81	1.85	0.08	0.01		0.62	6.09	0.05	0.08		-2.52	-9.91	-0.14
A117	SASA	0.21	14.5	-0.71	-4.07		0.45	-7.16	3.45	6.33		0.53	12.98	0.31	-0.44		0.12	-9.34	2.27	1		0.3	4.53	0.48	-1.16		-0.31	-38.52	0.27	1.93		0	2.47	0.35	0.09		-0.25	14.01	-0.61	-1.08		-0.08	13.61	0.26	-0.68		-0.88	-23.35	-0.38
A118	SAYAS	0.34	15.44	-5.79	-4.1		3.42	-22.15	8.46	5.62		-1.35	48.86	-2.76	-0.25		-1.21	-0.44	2.85	0.11		3.42	5.09	2.02	-0.04		-0.72	2.65	0.68	0.86		1.08	-12.14	1.83	0.39		0.68	4.87	0.45	0.38		0.39	3.38	-0.05	0.59		0.48	90.5	-0.16
A119	SEKUR	-0.35	3.23	-1.62	-4		-0.13	4.81	2.08	4.43		0.35	0.52	0.36	0.09		0.41	-0.4	0.76	0.63		0.27	-1.55	0.28	0.86		-0.81	-4.17	-0.2	-0.96		0.43	-0.55	0.51	0.35		0.19	1.01	-0.06	0.18		0.15	1.84	-0.64	0.08		-0.67	2.89	-0.05
A120	SELGD	2.03	0.18	0.41	-1.06		0.08	-1.96	-0.27	3.78		4.96	0.81	0.04	-8.1		4.6	0.48	1.53	9.02		1.28	0.38	0.62	11.91		-0.98	-12.63	-0.08	-9.31		0.26	10.97	-0.26	-0.34		-0.02	1.74	-0.1	-0.2		0.6	-0.28	0.3	1.53		-0.6	-2.09	-0.03
A121	SILVR	0.47	3.54	-0.75	-0.52		-1.8	-17.44	-2.2	0.34		1.08	20.63	2.94	0.24		0.37	2.95	-0.23	-0.24		0.79	-1.61	2.87	0.59		-1.3	13.63	-0.52	-0.08		0.58	-7.28	0.91	0.03		0.82	1.87	1.36	0.46		0.2	7.07	-1.2	-0.31		-1.99	-12.55	-0.01
A122	SKTAS	0.14	-0.69	0.86	1.08		-0.2	23.57	0.05	-0.79		0.25	12.54	0.18	0.26		0.21	109.51	-2.93	0.32		0.05	-70.52	2.39	1.91		-0.55	-60.88	1.3	-2		0.04	-13.87	0.75	0.41		0.06	-3.43	0.19	0.62		0.01	-23.03	0.11	1.55		0.13	75.58	0.28
A123	SNPAM	-6.97	6.73	-4.57	-30.44		-2.07	3.61	-2.28	19.95		9.99	5.53	4.76	2.81		3.81	-0.14	3.93	6.19		2.64	-1.94	1.93	6.8		-0.66	-23.45	-0.25	4.92		0.99	9.88	0.43	0.26		0.54	0.66	0.1	-1.25		0.49	12.84	-0.21	-3.68		-0.47	-7.75	-0.15
A124	TATGD	0.7	6.83	-0.25	-1.5		-0.95	-11.65	-0.59	1.38		0.28	11.58	-0.28	0.21		-0.03	1.87	0.27	-0.07		0.68	5.15	0.76	0.65		-0.81	-6.66	0.01	0.01		0.78	3.57	0.22	0.08		0.24	2.01	0.24	0.34		0.14	3.56	-0.06	-0.14		-1.02	-5.04	0.09
A125	TBORG	-0.73	7.81	-0.49	-4.98		-0.18	-22.71	-0.12	5.76		0.4	4.05	-0.16	-0.67		1.08	15.84	-0.09	-1.41		0.27	8.1	0.26	-4.05		-1.61	-32.79	0.23	6.52		1.19	8.33	0.59	0.17		0.97	15.61	-0.26	-0.77		0.001	4.72	-1.01	-4.9		-2.31	-25.59	1.46
A126	TIRE	0.71	14.73	0.16	-0.73		-1.15	-5.71	-1.45	0.83		0.28	10.87	0.11	-0.29		0.37	3.52	-0.47	-0.83		0.34	4.16	0.43	-1.73		-0.47	9.14	1.6	3.28		0.98	0.15	2.02	0.47		0.71	2.8	1.33	0.59		-0.2	-8.45	-1.52	-0.95		-1.22	-29.54	0.12
A127	TMPOL	0.25	7.52	-1.27	-3.1		-0.27	-15.24	1.61	3.62		0.5	6.82	0.48	-0.11		0.22	9.12	0.33	-0.59		0.42	5.22	0.83	0.03		-1.12	-44.64	0.02	1.23		0.54	10	0.67	0.3		0.65	1.6	1.56	1.4		-0.12	3.25	-1.5	-0.47		-0.25	37.13	-0.22
A128	TMSN	-0.66	1.62	-1.11	-5.36		0.41	-3.95	1.35	6.08		0.96	6.33	0.6	0.67		0.38	1.2	0.21	0.53		0.4	0.84	0.46	2.56		-0.47	3.48	-0.32	-2.69		0.08	-0.12	-0.1	-0.4		0.07	0.17	-0.06	-0.19		-0.09	-3.23	-0.1	-0.74		-0.49	4.04	-0.02
A129	TOASO	0.83	16.76	0.72	-0.23		-1.18	-21.99	1.02	0.97		0.62	7.72	0.34	0.07		0.11	14.35	-0.27	-0.48		0.57	7.64	1.3	0.49		-1.86	-24	-0.67	-0.08		0.64	8.37	0.56	0.09		0.73	4.98	-0.21	-0.11		0.52	10.49	0.01	-0.19		-1.41	-25.51	0.46
A130	TTRAK	0.26	13.38	-4.62	-2.19		-1.12	-17.12	4.87	2.23		1.35	18.57	1.54	0.29		0.47	15.83	0.13	-0.21		1.22	8.23	2.26	0.7		-1.37	-3.4	-1.03	0.07		0.72	8.41	0.57	0.01		0.78	3.04	0.77	0.17		0.22	2.05	0.03	0.2		-1.53	-35.68	-0.36
A131	TUCLK	0.43	5.74	0.96	0.66		-0.46	4.86	-0.46	0.16		0.27	4.96	-0.03	-0.11		0.26	2.63	0.65	0.84		0.15	-1.76	0.39	1.11		-0.55	-1.14	-0.04	-1.39		0.14	-3.38	0.38	0.4		0.38	4	0.23	0.38		0.11	0.47	-0.09	0.94		-0.45	7.72	0.02
A132	TUKAS	0.01	4.44	-0.68	-5.07		-0.85	-21.64	-0.95	5.56		0.38	-3.64	-2.21	-1.07		-0.63	12.2	-0.45	-1.45		0.22	6.4	-0.2	-3.98		-1.64	-29.87	-4.33	4.26		2.66	3.41	6	1.96		-0.21	18.75	-0.74	-0.91		0.78	9.8	0.7	-1.95		0.52	-14.14	3.46
A133	TUPRS	0.52	15.04	0.08	0.34		-0.73	14.12	-0.22	-0.33		0.28	7.87	0.3	0.18		0.32	-5.24	-0.15	-0.01		0.21	-2.61	0.43	0.17		-1.65	-25.71	-0.67	-0.48		0.27	1.53	-0.35	-0.06		0.5	-1.07	0.56	0.12		0.39	7.16	-0.43	-0.14		-2.37	-41.39	-0.3
A134	ULKER	0.16	3.77	-0.08	1.67		-0.63	-12.5	-0.24	-2.92		0.4	4.97	-0.07	-0.35		0.1	6.21	-0.21	-0.15		0.64	10.98	0.11	-0.63		-0.9	-23.94	-0.17	0.12		0.13	3.12	0.1	0.42		0.27	6.58	0.02	0.17		-0.01	2.4	0.03	1.56		-0.49	-13.07	0.06
A135	ULUUN	1.24	3.82	1	0.17		-2.37	-8.43	-1.14	-0.15		1.05	0.23	0.25	0.01		0.27	3.88	-0.06	-0.02		0.99	1.3	1.25	0.26		-1.83	-4.03	-0.09	-0.14		0.47	1.38	0.27	0.04		0.45	2.3	0.19	0.07		0.86	3.43	-0.05	0.16		-2.25	-5.41	0.05
A136	USAK	-0.03	2.4	-0.42	-1.05		-0.39	-1.35	0.04	0.72		0.23	-0.01	0.37	0.45		0.27	1.3	0.03	0.28		0.48	-0.24	0.55	2.14		-0.36	-3.54	-0.19	-2.07		0.23	1.41	0.13	0.06		0.13	-0.98	0.14	0.59		0.14	1.79	-0.01	1.5		-0.29	-0.38	-0.19
A137	VESBE	0.14	13.78	-0.64	-1.87		-1.08	-31.27	0.82	2.11		0.73	9.57	0.06	-0.02		0.2	13.69	0.001	-0.25		0.88	9.37	0.67	0.14		-1.6	-24.48	-0.69	0.25		0.63	5.09	0.57	0.1		0.47	6.05	-0.47	-0.31		0.4	15.91	0.48	-0.3		-1.12	-29.97	0.43
A138	VESTL	0.25	8.87	-0.53	-0.55		-0.7	-23.56	0.65	0.59		0.42	6.19	-0.18	-0.01		0.23	6.7	-0.05	0.02		0.33	8.09	0.33	0.51		-0.67	-3.54	-0.25	-0.62		0.28	4.61	0.18	0.04		0.41	3.42	0.97	0.44		0.05	10.34	-1.41	-0.52		-0.76	-21.25	0.83
A139	YATAS	0.2	7.25	-0.42	-1.51		-1.07	-23.92	-0.26	1.78		1.01	11.38	1.29	0.26		0.44	13.67	-0.28	-0.46		0.6	2.62	1.15	0.42		-1.58	-17.69	-0.89	0.07		0.41	4.15	0.26	-0.04		0.77	5.85	0.57	0.18		0.47	7.74	-0.41	-0.83		-1.57	-20.22	0.22
A140	YUNSA	0.12	-11.35	0.08	-3.06		-1.19	-19.26	1.99	4.83		0.26	-1.14	0.2	-0.14		0.27	7.16	-0.81	-0.73		0.71	-2.36	2.2	0.85		-1.03	0.73	-0.61	0.47		1.06	4.59	1.59	0.26		0.21	-5.24	0.3	0.04		0.32	5.43	-0.13	-0.22		-1.18	-30.14	0.17
[truncated: 5 more columns]

## Sheet: weighted
			Objectives	Types (Max or Min)	Weightage used (SWARA)
			ALTMAN Z SKOR	Max	0.163265
			ROE	Max	0.163265
			PD/DD	Max	0.244898
			MVA mrg	Max	0.428571
				benefit
			0.163265	0.163265	0.244898	0.428571

## Sheet: 19_03
2021/06	C1	C2	C3	C4
A1	-0.71	-23.22	0.15	0.64
A2	-0.69	-5.67	-0.07	0.12
A3	-0.61	-5.59	-0.22	-4.83
A4	-0.3	-8.32	0.03	0.78
A5	-1.22	-14.43	0.02	0.27
A6	-0.67	-11.24	0.18	-0.32
A7	-1.13	-12.28	0.01	0.16
A8	-3.38	-26	0.29	0.73
A9	-2.38	-22.4	-0.11	0.82
A10	-1.36	169.35	0.1	12.82
A11	-0.83	-7.88	0.001	-0.78
A12	-0.34	1.28	-0.03	-3.14
A13	-0.35	9.34	0.18	-0.63
A14	-0.54	-2.83	-0.04	-2.11
A15	-0.59	20.36	-1.53	0.25
A16	-1.86	-8.65	0.001	-0.05
A17	0.45	29.86	0.02	-1.28
A18	-1	-17.11	-0.06	-0.63
A19	-1.8	-12.97	-0.1	0.05
A20	-3.88	-32.89	-0.63	4.18
A21	-0.76	-25.13	0.09	-2.3
A22	0.85	-5.73	0.3	-1.1
A23	-0.62	-39.89	0.07	-1.11
A24	-0.63	-10.66	0.08	-1.3
A25	-0.1	4.96	-0.07	-15.92
A26	-1.03	-3.42	0.02	-0.21
A27	-0.65	-9.75	0.08	-1.81
A28	-0.32	-4.34	0.001	-4.42
A29	-1.74	-27.9	0.001	-0.93
A30	-0.65	-6.92	0.001	-2.02
A31	-1.33	-6.36	0.15	1.14
A32	0.21	11.25	0.12	-82.02
A33	-0.85	-7.14	-0.09	-1.61
A34	-1.78	-41.11	0.34	0.41
A35	0.01	33.68	-0.15	-1.1
A36	-2.73	-29.59	-0.16	0.46
A37	-0.57	-10.74	-0.1	-3.52
A38	-1.88	-19.64	0.06	0.08
A39	0.28	-2.1	0.38	0.56
A40	-0.58	3.18	0.04	-0.28
A41	-0.92	7.57	0.04	-1.77
A42	-0.56	4.05	-0.02	-0.74
A43	-1.29	-5.51	-0.01	-0.85
A44	-0.52	-10.25	0.19	-0.53
A45	-1.47	-21.53	0.22	0.23
A46	-1.11	-24.6	0.19	-0.16
A47	-2.21	-7.75	-0.3	0.21
A48	-0.99	10.81	-1.41	35.2
A49	-0.82	-59.65	-0.42	-0.29
A50	-0.92	-23.83	0.17	-0.62
A51	-0.77	33.42	0.02	-0.16
A52	-0.93	-44.38	0.28	1.76
A53	-0.82	-10.87	0.06	0.13
A54	-0.9	-26.11	0.81	1.9
A55	-1.21	-17.25	-0.02	-1.01
A56	-0.66	46.77	-0.01	-2.13
A57	-0.01	44.95	-0.06	-3.27
A58	-2.05	-80.85	0.09	-0.14
A59	-1.11	-18.26	-0.07	0.05
A60	-1.29	-16.69	0.31	0.25
A61	-0.27	0.31	-0.09	-4.91
A62	-17.62	-34.57	1.88	5.9
A63	1.86	-14.06	4.45	26.18
A64	-0.49	-10.09	0.001	-0.81
A65	-2.51	-29.54	0.39	0.88
A66	-0.9	-21.21	0.03	-0.63
A67	-1.39	-20.92	0.06	-0.66
A68	-1.26	-6.94	-0.24	-0.74
A69	-0.41	7.41	-0.17	-1.82
A70	-1.7	-20.17	-0.02	0.12
A71	-0.89	-17.68	-0.07	-0.36
A72	-0.6	-6.51	-0.01	-3.22
A73	-0.86	-18.03	0.08	0.7
A74	-1.8	-42.69	-0.09	-2.02
A75	0.1	-0.4	0.45	-0.42
A76	-0.13	2.42	0.07	-4.3
A77	-2.04	-22.32	0.47	1.21
A78	-1.62	-19.42	-0.11	0.32
A79	-1.22	-13.3	-0.16	-0.04
A80	-0.49	-3.18	0.58	-0.14
A81	-1.94	-21.99	-0.01	2.04
A82	-0.18	13.81	0.26	-1.98
A83	-2.43	-11.81	-0.13	8.43
A84	-0.56	10.96	-0.46	-1.81
A85	-0.67	-15.26	0.32	-0.52
A86	-0.81	-20.19	-0.13	0.18
A87	-0.13	-11.26	0.12	8.28
A88	-0.81	-12.77	0.001	-0.71
A89	-0.93	-18.29	0.13	-1.33
A90	-0.94	-18.29	0.13	-1.35
A91	-0.98	-18.29	0.05	-1.37
A92	0.28	13.14	-0.75	-2.08
A93	-0.51	-17.65	-0.02	-1.51
A94	-1.36	-9.15	-0.06	-1.32
A95	-0.32	3	-0.03	-2.39
A96	-1.9	-8.35	-0.86	5.97
A97	-0.51	23.89	0.001	-1.56
A98	-1.14	60.99	-0.51	0.91
A99	4.99	16.65	3.31	83.75
A100	-0.86	-11.76	-0.12	-0.57
A101	-0.92	-14.56	0.22	0.08
A102	-0.96	-45.85	3	2.62
A103	-1.31	-8.72	0.39	5.2
A104	-0.43	2.14	0.03	-1.1
A105	-0.08	12.54	-0.03	-2.24
A106	-0.79	-29.57	2.38	2.05
A107	-0.81	-17.06	-0.26	-0.63
A108	-0.99	-10.81	0.16	-1.14
A109	-0.62	18.03	0.17	-0.75
A110	-0.86	-4.06	0.001	-1.2
A111	-1.07	-11.16	0.09	0.01
A112	-1.14	-2.36	0.05	-1.5
A113	0.63	3.71	-0.18	-4.32
A114	-1.01	-1.54	-0.09	-2.04
A115	-0.86	-3.51	0.43	-0.32
A116	-2.52	-9.91	-0.14	-0.1
A117	-0.88	-23.35	-0.38	1.5
A118	0.48	90.5	-0.16	-0.8
A119	-0.67	2.89	-0.05	-0.71
A120	-0.6	-2.09	-0.03	-1.22
A121	-1.99	-12.55	-0.01	-0.1
A122	0.13	75.58	0.28	-2.2
A123	-0.47	-7.75	-0.15	5.72
A124	-1.02	-5.04	0.09	-0.11
A125	-2.31	-25.59	1.46	5.68
A126	-1.22	-29.54	0.12	0.36
A127	-0.25	37.13	-0.22	-1
A128	-0.49	4.04	-0.02	0.75
A129	-1.41	-25.51	0.46	0.49
A130	-1.53	-35.68	-0.36	-0.04
A131	-0.45	7.72	0.02	-1.37
A132	0.52	-14.14	3.46	4.93
A133	-2.37	-41.39	-0.3	0.07
A134	-0.49	-13.07	0.06	-1.3
A135	-2.25	-5.41	0.05	-0.23
A136	-0.29	-0.38	-0.19	-2.26
A137	-1.12	-29.97	0.43	0.75
A138	-0.76	-21.25	0.83	0.17
A139	-1.57	-20.22	0.22	0.94
A140	-1.18	-30.14	0.17	0.26
MAX	4.99	169.35	4.45	83.75
MIN	-17.62	-80.85	-1.53	-82.02
	1	1	1	1
	Normalization
	C1	C2	C3	C4
A1	0.747899	0.230336	0.280936	0.498643
A2	0.748784	0.30048	0.244147	0.495506
A3	0.752322	0.300799	0.219064	0.465645
A4	0.766033	0.289888	0.26087	0.499487
A5	0.725343	0.265468	0.259197	0.496411
A6	0.749668	0.278217	0.285953	0.492852
A7	0.729323	0.274061	0.257525	0.495747
A8	0.62981	0.219225	0.304348	0.499186
A9	0.674038	0.233613	0.237458	0.499729
A10	0.719151	1	0.272575	0.572118
A11	0.742592	0.291647	0.25602	0.490077
A12	0.764264	0.328257	0.250836	0.47584
A13	0.763821	0.360472	0.285953	0.490981
A14	0.755418	0.311831	0.249164	0.482053
A15	0.753207	0.404516	0	0.49629
A16	0.697037	0.288569	0.25602	0.49448
A17	0.799204	0.442486	0.259197	0.48706
A18	0.735073	0.254756	0.245819	0.490981
A19	0.69969	0.271303	0.23913	0.495084
A20	0.607696	0.191687	0.150502	0.519998
A21	0.745688	0.222702	0.270903	0.480907
A22	0.816895	0.30024	0.30602	0.488146
A23	0.75188	0.163709	0.267559	0.488086
A24	0.751437	0.280536	0.269231	0.48694
A25	0.774878	0.342966	0.244147	0.398745
A26	0.733746	0.309472	0.259197	0.493515
A27	0.750553	0.284173	0.269231	0.483863
A28	0.765148	0.305795	0.25602	0.468118
A29	0.702344	0.211631	0.25602	0.489172
A30	0.750553	0.295484	0.25602	0.482596
A31	0.720478	0.297722	0.280936	0.501659
A32	0.788589	0.368106	0.27592	0
A33	0.741707	0.294604	0.240803	0.48507
A34	0.700575	0.158833	0.312709	0.497255
A35	0.779743	0.457754	0.230769	0.488146
A36	0.658558	0.204876	0.229097	0.497557
A37	0.754091	0.280216	0.23913	0.473548
A38	0.696152	0.244644	0.265886	0.495265
A39	0.791685	0.314748	0.319398	0.49816
A40	0.753649	0.335851	0.262542	0.493093
A41	0.738611	0.353397	0.262542	0.484104
A42	0.754533	0.339329	0.252508	0.490318
A43	0.722247	0.301119	0.254181	0.489654
A44	0.756303	0.282174	0.287625	0.491585
A45	0.714286	0.23709	0.292642	0.496169
A46	0.730208	0.22482	0.287625	0.493817
A47	0.681557	0.292166	0.205686	0.496049
A48	0.735515	0.366347	0.0200669	0.707124
A49	0.743034	0.0847322	0.185619	0.493033
A50	0.738611	0.227898	0.284281	0.491042
A51	0.745245	0.456715	0.259197	0.493817
A52	0.738169	0.145763	0.302676	0.505399
A53	0.743034	0.279696	0.265886	0.495566
A54	0.739496	0.218785	0.391304	0.506244
A55	0.725785	0.254197	0.252508	0.488689
A56	0.750111	0.510072	0.254181	0.481933
A57	0.778859	0.502798	0.245819	0.475056
A58	0.688633	0	0.270903	0.493937
A59	0.730208	0.25016	0.244147	0.495084
A60	0.722247	0.256435	0.307692	0.49629
A61	0.76736	0.32438	0.240803	0.465163
A62	0	0.184972	0.570234	0.530373
A63	0.861566	0.266946	1	0.652712
A64	0.757629	0.282814	0.25602	0.489896
A65	0.668288	0.205076	0.32107	0.50009
A66	0.739496	0.238369	0.26087	0.490981
A67	0.717824	0.239528	0.265886	0.490801
A68	0.723574	0.295404	0.215719	0.490318
A69	0.761168	0.352758	0.227425	0.483803
A70	0.704113	0.242526	0.252508	0.495506
A71	0.739938	0.252478	0.244147	0.49261
A72	0.752764	0.297122	0.254181	0.475357
A73	0.741265	0.251079	0.269231	0.499005
A74	0.69969	0.152518	0.240803	0.482596
A75	0.783724	0.321543	0.331104	0.492248
A76	0.773552	0.332814	0.267559	0.468842
A77	0.689076	0.233933	0.334448	0.502081
A78	0.707651	0.245524	0.237458	0.496712
A79	0.725343	0.269984	0.229097	0.494541
A80	0.757629	0.310432	0.352843	0.493937
A81	0.693498	0.235252	0.254181	0.507088
A82	0.77134	0.378337	0.299331	0.482838
A83	0.671827	0.275939	0.234114	0.545636
A84	0.754533	0.366946	0.17893	0.483863
A85	0.749668	0.26215	0.309365	0.491645
A86	0.743476	0.242446	0.234114	0.495868
A87	0.773552	0.278137	0.27592	0.544731
A88	0.743476	0.272102	0.25602	0.490499
A89	0.738169	0.25004	0.277592	0.486759
A90	0.737727	0.25004	0.277592	0.486638
A91	0.735958	0.25004	0.264214	0.486517
A92	0.791685	0.375659	0.130435	0.482234
A93	0.756745	0.252598	0.252508	0.485673
A94	0.719151	0.286571	0.245819	0.486819
A95	0.765148	0.335132	0.250836	0.480364
A96	0.695268	0.289768	0.11204	0.530796
A97	0.756745	0.418625	0.25602	0.485371
A98	0.728881	0.566906	0.170569	0.500271
A99	1	0.389688	0.809365	1
A100	0.741265	0.276139	0.235786	0.491343
A101	0.738611	0.264948	0.292642	0.495265
A102	0.736842	0.139888	0.757525	0.510587
A103	0.721362	0.288289	0.32107	0.526151
A104	0.760283	0.331695	0.26087	0.488146
A105	0.775763	0.373261	0.250836	0.481269
A106	0.744361	0.204956	0.653846	0.507148
A107	0.743476	0.254956	0.212375	0.490981
A108	0.735515	0.279936	0.282609	0.487905
A109	0.75188	0.395204	0.284281	0.490258
A110	0.741265	0.306914	0.25602	0.487543
A111	0.731977	0.278537	0.270903	0.494842
A112	0.728881	0.313709	0.264214	0.485733
A113	0.807165	0.33797	0.225753	0.468722
A114	0.734631	0.316986	0.240803	0.482476
A115	0.741265	0.309113	0.327759	0.492852
A116	0.667846	0.283533	0.232441	0.494179
A117	0.74038	0.229816	0.192308	0.503831
A118	0.800531	0.684852	0.229097	0.489956
A119	0.749668	0.334692	0.247492	0.490499
A120	0.752764	0.314788	0.250836	0.487422
A121	0.691287	0.272982	0.254181	0.494179
A122	0.785051	0.62522	0.302676	0.481511
A123	0.758514	0.292166	0.230769	0.529288
A124	0.734188	0.302998	0.270903	0.494118
A125	0.677134	0.220863	0.5	0.529046
A126	0.725343	0.205076	0.27592	0.496954
A127	0.768244	0.471543	0.219064	0.488749
A128	0.757629	0.339289	0.252508	0.499306
A129	0.716939	0.221183	0.332776	0.497738
A130	0.711632	0.180536	0.195652	0.494541
A131	0.759398	0.353997	0.259197	0.486517
A132	0.8023	0.266627	0.834448	0.524522
A133	0.67448	0.157714	0.205686	0.495204
A134	0.757629	0.270903	0.265886	0.48694
A135	0.679788	0.301519	0.264214	0.493394
A136	0.766475	0.321623	0.22408	0.481149
A137	0.729766	0.203357	0.327759	0.499306
A138	0.745688	0.238209	0.394649	0.495807
A139	0.709863	0.242326	0.292642	0.500452
A140	0.727112	0.202678	0.284281	0.49635
	0.163265	0.163265	0.244898	0.428571
	Weighted normalized matrix
	C1	C2	C3	C4		Si	λ
A1	0.122106	0.0376058	0.0688008	0.213704		0.442216	0.5
A2	0.12225	0.0490578	0.0597912	0.212359		0.443459
A3	0.122828	0.04911	0.0536482	0.199562		0.425148
A4	0.125066	0.0473286	0.0638864	0.214066		0.450347
A5	0.118423	0.0433416	0.0634769	0.212747		0.437989
A6	0.122395	0.0454232	0.0700294	0.211222		0.449069
A7	0.119073	0.0447445	0.0630674	0.212463		0.439348
A8	0.102826	0.0357917	0.0745342	0.213936		0.427088
A9	0.110047	0.0381408	0.058153	0.214169		0.42051
A10	0.117412	0.163265	0.0667531	0.245193		0.592623
A11	0.121239	0.0476157	0.0626988	0.210033		0.441586
A12	0.124777	0.0535929	0.0614293	0.203931		0.443731
A13	0.124705	0.0588524	0.0700294	0.21042		0.464007
A14	0.123333	0.050911	0.0610197	0.206594		0.441858
A15	0.122972	0.0660434	0	0.212696		0.401711
A16	0.113802	0.0471132	0.0626988	0.21192		0.435534
A17	0.130482	0.0722425	0.0634769	0.20874		0.474941
A18	0.120012	0.0415928	0.0602007	0.21042		0.432226
A19	0.114235	0.0442943	0.0585626	0.212178		0.42927
A20	0.0992154	0.0312957	0.0368576	0.222856		0.390225
A21	0.121745	0.0363594	0.0663436	0.206103		0.430551
A22	0.13337	0.0490187	0.0749437	0.209205		0.466538
A23	0.122756	0.026728	0.0655245	0.209179		0.424188
A24	0.122683	0.0458016	0.0659341	0.208688		0.443107
A25	0.126511	0.0559943	0.0597912	0.170891		0.413187
A26	0.119795	0.050526	0.0634769	0.211506		0.445304
A27	0.122539	0.0463954	0.0659341	0.20737		0.442238
A28	0.124922	0.0499257	0.0626988	0.200622		0.438168
A29	0.114668	0.0345519	0.0626988	0.209645		0.421564
A30	0.122539	0.0482421	0.0626988	0.206827		0.440307
A31	0.117629	0.0486076	0.0688008	0.214996		0.450034
A32	0.128749	0.0600987	0.0675722	0		0.25642
A33	0.121095	0.0480986	0.0589721	0.207887		0.436052
A34	0.114379	0.0259319	0.0765818	0.213109		0.430002
A35	0.127305	0.0747352	0.0565149	0.209205		0.46776
A36	0.107519	0.0334491	0.0561054	0.213238		0.410312
A37	0.123117	0.0457494	0.0585626	0.202949		0.430377
A38	0.113657	0.0399418	0.065115	0.212256		0.43097
A39	0.129254	0.0513874	0.0782199	0.213497		0.472359
A40	0.123044	0.0548328	0.064296	0.211325		0.453498
A41	0.120589	0.0576974	0.064296	0.207473		0.450056
A42	0.123189	0.0554005	0.0618388	0.210136		0.450564
A43	0.117918	0.0491622	0.0622483	0.209852		0.43918
A44	0.123478	0.0460692	0.0704389	0.210679		0.450665
A45	0.116618	0.0387086	0.0716675	0.212644		0.439638
A46	0.119217	0.0367053	0.0704389	0.211636		0.437997
A47	0.111274	0.0477005	0.050372	0.212592		0.421939
A48	0.120084	0.0598116	0.00491434	0.303053		0.487863
A49	0.121311	0.0138338	0.0454577	0.211299		0.391902
A50	0.120589	0.0372077	0.0696198	0.210446		0.437863
A51	0.121673	0.0745655	0.0634769	0.211636		0.47135
A52	0.120517	0.0237981	0.0741246	0.216599		0.435039
A53	0.121311	0.0456646	0.065115	0.212385		0.444476
A54	0.120734	0.0357199	0.0958297	0.216961		0.469245
A55	0.118495	0.0415014	0.0618388	0.209438		0.431274
A56	0.122467	0.0832769	0.0622483	0.206542		0.474534
A57	0.12716	0.0820893	0.0602007	0.203595		0.473045
A58	0.11243	0	0.0663436	0.211687		0.390461
A59	0.119217	0.0408424	0.0597912	0.212178		0.432029
A60	0.117918	0.0418668	0.0753532	0.212696		0.447833
A61	0.125283	0.05296	0.0589721	0.199355		0.43657
A62	0	0.0301995	0.139649	0.227303		0.397151
A63	0.140664	0.043583	0.244898	0.279733		0.708878
A64	0.123694	0.0461736	0.0626988	0.209955		0.442522
A65	0.109108	0.0334817	0.0786295	0.214324		0.435544
A66	0.120734	0.0389174	0.0638864	0.21042		0.433958
A67	0.117196	0.0391066	0.065115	0.210343		0.43176
A68	0.118134	0.0482291	0.0528292	0.210136		0.429329
A69	0.124272	0.057593	0.0556959	0.207344		0.444905
A70	0.114957	0.039596	0.0618388	0.212359		0.428751
A71	0.120806	0.0412208	0.0597912	0.211118		0.432936
A72	0.1229	0.0485097	0.0622483	0.203724		0.437382
A73	0.121023	0.0409924	0.0659341	0.213859		0.441808
A74	0.114235	0.0249008	0.0589721	0.206827		0.404935
A75	0.127955	0.0524967	0.0810866	0.210963		0.472501
A76	0.126294	0.0543368	0.0655245	0.200932		0.447088
A77	0.112502	0.038193	0.0819057	0.215177		0.447778
A78	0.115535	0.0400854	0.058153	0.212876		0.42665
A79	0.118423	0.0440789	0.0561054	0.211946		0.430553
A80	0.123694	0.0506826	0.0864105	0.211687		0.472475
A81	0.113224	0.0384084	0.0622483	0.217323		0.431204
A82	0.125933	0.0617692	0.0733056	0.20693		0.467938
A83	0.109686	0.0450512	0.057334	0.233844		0.445915
A84	0.123189	0.0599095	0.0438195	0.20737		0.434288
A85	0.122395	0.0428	0.0757628	0.210705		0.451662
A86	0.121384	0.039583	0.057334	0.212515		0.430815
A87	0.126294	0.0454101	0.0675722	0.233456		0.472732
A88	0.121384	0.0444248	0.0626988	0.210214		0.438721
A89	0.120517	0.0408228	0.0679817	0.208611		0.437932
A90	0.120445	0.0408228	0.0679817	0.208559		0.437808
A91	0.120156	0.0408228	0.0647055	0.208507		0.434192
A92	0.129254	0.061332	0.0319432	0.206672		0.429201
A93	0.12355	0.0412404	0.0618388	0.208145		0.434774
A94	0.117412	0.046787	0.0602007	0.208637		0.433036
A95	0.124922	0.0547153	0.0614293	0.20587		0.446937
A96	0.113513	0.047309	0.0274384	0.227484		0.415744
A97	0.12355	0.0683468	0.0626988	0.208016		0.462612
A98	0.119001	0.092556	0.0417719	0.214402		0.46773
A99	0.163265	0.0636225	0.198212	0.428571		0.85367
A100	0.121023	0.0450838	0.0577435	0.210576		0.434426
A101	0.120589	0.0432567	0.0716675	0.212256		0.44777
A102	0.120301	0.0228388	0.185516	0.218823		0.547478
A103	0.117773	0.0470676	0.0786295	0.225493		0.468963
A104	0.124128	0.0541541	0.0638864	0.209205		0.451373
A105	0.126655	0.0609405	0.0614293	0.206258		0.455283
A106	0.121528	0.0334621	0.160126	0.217349		0.532465
A107	0.121384	0.0416254	0.0520101	0.21042		0.42544
A108	0.120084	0.0457038	0.0692103	0.209102		0.4441
A109	0.122756	0.064523	0.0696198	0.21011		0.467009
A110	0.121023	0.0501084	0.0626988	0.208947		0.442777
A111	0.119506	0.0454754	0.0663436	0.212075		0.4434
A112	0.119001	0.0512177	0.0647055	0.208171		0.443095
A113	0.131782	0.0551786	0.0552863	0.200881		0.443127
A114	0.119939	0.0517528	0.0589721	0.206775		0.437439
A115	0.121023	0.0504673	0.0802676	0.211222		0.462979
A116	0.109036	0.046291	0.0569245	0.211791		0.424042
A117	0.120878	0.0375209	0.0470958	0.215927		0.421422
A118	0.130699	0.111812	0.0561054	0.209981		0.508597
A119	0.122395	0.0546435	0.0606102	0.210214		0.447862
A120	0.1229	0.0513939	0.0614293	0.208895		0.444618
A121	0.112863	0.0445683	0.0622483	0.211791		0.43147
A122	0.128171	0.102077	0.0741246	0.206361		0.510734
A123	0.123839	0.0477005	0.0565149	0.226837		0.454892
A124	0.119867	0.0494689	0.0663436	0.211765		0.447445
A125	0.110552	0.0360592	0.122449	0.226734		0.495794
A126	0.118423	0.0334817	0.0675722	0.21298		0.432457
A127	0.125427	0.0769864	0.0536482	0.209464		0.465526
A128	0.123694	0.0553939	0.0618388	0.213988		0.454915
A129	0.117051	0.0361115	0.0814962	0.213316		0.447975
A130	0.116185	0.0294751	0.0479148	0.211946		0.40552
A131	0.123983	0.0577953	0.0634769	0.208507		0.453763
A132	0.130987	0.0435308	0.204355	0.224795		0.603668
A133	0.110119	0.0257491	0.050372	0.21223		0.39847
A134	0.123694	0.044229	0.065115	0.208688		0.441727
A135	0.110986	0.0492275	0.0647055	0.211455		0.436373
A136	0.125139	0.0525097	0.0548768	0.206206		0.438731
A137	0.119145	0.0332011	0.0802676	0.213988		0.446602
A138	0.121745	0.0388913	0.0966487	0.212489		0.469773
A139	0.115896	0.0395634	0.0716675	0.214479		0.441606
A140	0.118712	0.0330902	0.0696198	0.212721		0.434143
					Min Si	0.25642
	Normalized matrix				Max Si	0.85367
	C1	C2	C3	C4		Pi	Si+Pi	kia	kib	kic	ki	rank
A1	0.747899	0.230336	0.280936	0.498643		3.21544	3.65765	0.00713835	3.06844	0.784806	1.54488	73
A2	0.748784	0.30048	0.244147	0.495506		3.22376	3.66722	0.00715702	3.07677	0.786859	1.54903	64
A3	0.752322	0.300799	0.219064	0.465645		3.18663	3.61178	0.00704883	2.98984	0.774963	1.511	120
A4	0.766033	0.289888	0.26087	0.499487		3.23664	3.68698	0.00719559	3.10901	0.791099	1.56304	42
A5	0.725343	0.265468	0.259197	0.496411		3.21339	3.65138	0.00712611	3.0511	0.78346	1.53787	84
A6	0.749668	0.278217	0.285953	0.492852		3.23992	3.68899	0.00719951	3.1054	0.79153	1.56197	43
A7	0.729323	0.274061	0.257525	0.495747		3.21688	3.65623	0.00713557	3.05786	0.7845	1.54088	77
A8	0.62981	0.219225	0.304348	0.499186		3.19758	3.62466	0.00707397	3.00198	0.777728	1.51693	117
A9	0.674038	0.233613	0.237458	0.499729		3.17233	3.59284	0.00701187	2.96578	0.7709	1.50005	127
A10	0.719151	1	0.272575	0.572118		3.46213	4.05475	0.00791333	3.75811	0.870009	1.84111	4
A11	0.742592	0.291647	0.25602	0.490077		3.22327	3.66486	0.00715241	3.06926	0.786352	1.54603	69
A12	0.764264	0.328257	0.250836	0.47584		3.23087	3.6746	0.00717142	3.0808	0.788442	1.55136	59
A13	0.763821	0.360472	0.285953	0.490981		3.27669	3.7407	0.00730042	3.17903	0.802624	1.59474	25
A14	0.755418	0.311831	0.249164	0.482053		3.22498	3.66684	0.00715628	3.07104	0.786777	1.54691	68
A15	0.753207	0.404516	0	0.49629		2.55805	2.95976	0.00577632	2.63573	0.635062	1.30523	137
A16	0.697037	0.288569	0.25602	0.49448		3.21489	3.65042	0.00712424	3.04215	0.783255	1.53452	90
A17	0.799204	0.442486	0.259197	0.48706		3.29258	3.76752	0.00735277	3.22831	0.80838	1.61573	11
A18	0.735073	0.254756	0.245819	0.490981		3.19732	3.62954	0.00708349	3.02191	0.778774	1.52471	102
A19	0.69969	0.271303	0.23913	0.495084		3.19581	3.62508	0.00707478	3.00975	0.777816	1.51978	114
A20	0.607696	0.191687	0.150502	0.519998		3.07	3.46023	0.00675305	2.8049	0.742445	1.42608	135
A21	0.745688	0.222702	0.270903	0.480907		3.19273	3.62328	0.00707127	3.01346	0.777431	1.52091	112
A22	0.816895	0.30024	0.30602	0.488146		3.27284	3.73938	0.00729786	3.18729	0.802343	1.59756	24
A23	0.75188	0.163709	0.267559	0.488086		3.15812	3.58231	0.00699131	2.97418	0.76864	1.50183	125
A24	0.751437	0.280536	0.269231	0.48694		3.2268	3.66991	0.00716227	3.07667	0.787435	1.54931	62
A25	0.774878	0.342966	0.244147	0.398745		3.18124	3.59443	0.00701497	2.94094	0.771241	1.49125	129
A26	0.733746	0.309472	0.259197	0.493515		3.23374	3.67905	0.00718011	3.08814	0.789397	1.55455	52
A27	0.750553	0.284173	0.269231	0.483863		3.22633	3.66857	0.00715966	3.07309	0.787149	1.54786	65
A28	0.765148	0.305795	0.25602	0.468118		3.21995	3.65812	0.00713927	3.05455	0.784907	1.53991	78
A29	0.702344	0.211631	0.25602	0.489172		3.17234	3.59391	0.00701394	2.96989	0.771128	1.50166	126
A30	0.750553	0.295484	0.25602	0.482596		3.22184	3.66214	0.00714712	3.06367	0.785769	1.54369	74
A31	0.720478	0.297722	0.280936	0.501659		3.24523	3.69526	0.00721175	3.11138	0.792875	1.56488	41
A32	0.788589	0.368106	0.27592	0		2.54096	2.79738	0.00545942	2.06197	0.60022	1.07827	140
A33	0.741707	0.294604	0.240803	0.48507		3.21053	3.64658	0.00711674	3.04236	0.78243	1.53413	91
A34	0.700575	0.158833	0.312709	0.497255		3.17758	3.60758	0.00704063	3.00499	0.774063	1.51598	118
A35	0.779743	0.457754	0.230769	0.488146		3.27412	3.74188	0.00730273	3.19259	0.802878	1.59977	23
A36	0.658558	0.204876	0.229097	0.497557		3.14453	3.55484	0.0069377	2.91439	0.762746	1.47694	130
A37	0.754091	0.280216	0.23913	0.473548		3.19772	3.62809	0.00708067	3.01487	0.778464	1.52199	110
A38	0.696152	0.244644	0.265886	0.495265		3.20014	3.63111	0.00708656	3.0182	0.779112	1.52355	105
A39	0.791685	0.314748	0.319398	0.49816		3.28857	3.76093	0.00733991	3.21656	0.806966	1.61071	15
A40	0.753649	0.335851	0.262542	0.493093		3.251	3.7045	0.00722977	3.12731	0.794857	1.57173	33
A41	0.738611	0.353397	0.262542	0.484104		3.24905	3.6991	0.00721925	3.11307	0.7937	1.56595	38
A42	0.754533	0.339329	0.252508	0.490318		3.24396	3.69452	0.00721031	3.11292	0.792717	1.56535	40
A43	0.722247	0.301119	0.254181	0.489654		3.2217	3.66088	0.00714465	3.05922	0.785499	1.54193	75
A44	0.756303	0.282174	0.287625	0.491585		3.24341	3.69407	0.00720943	3.11308	0.79262	1.56535	39
A45	0.714286	0.23709	0.292642	0.496169		3.21781	3.65744	0.00713795	3.05938	0.784761	1.54158	76
A46	0.730208	0.22482	0.287625	0.493817		3.20976	3.64775	0.00711903	3.04962	0.782682	1.5369	87
A47	0.681557	0.292166	0.205686	0.496049		3.17671	3.59865	0.00702319	2.97318	0.772145	1.50341	124
A48	0.735515	0.366347	0.0200669	0.707124		3.04581	3.53367	0.00689639	3.17557	0.758204	1.56867	35
A49	0.743034	0.0847322	0.185619	0.493033		3.02158	3.41348	0.00666182	2.79121	0.732415	1.41557	136
A50	0.738611	0.227898	0.284281	0.491042		3.20938	3.64725	0.00711804	3.04894	0.782573	1.53659	88
A51	0.745245	0.456715	0.259197	0.493817		3.29052	3.76188	0.00734176	3.21345	0.807169	1.60969	16
A52	0.738169	0.145763	0.302676	0.505399		3.17455	3.60959	0.00704455	3.02337	0.774494	1.52286	108
A53	0.743034	0.279696	0.265886	0.495566		3.22798	3.67246	0.00716725	3.0825	0.787983	1.55172	57
A54	0.739496	0.218785	0.391304	0.506244		3.27387	3.74311	0.00730513	3.19827	0.803142	1.60197	21
A55	0.725785	0.254197	0.252508	0.488689		3.19826	3.62953	0.00708347	3.01859	0.778772	1.52351	107
A56	0.750111	0.510072	0.254181	0.481933		3.29645	3.77098	0.00735953	3.22834	0.809123	1.61616	10
A57	0.778859	0.502798	0.245819	0.475056		3.2899	3.76295	0.00734385	3.2198	0.807399	1.61211	13
A58	0.688633	0	0.270903	0.493937		2.4063	2.79676	0.00545822	2.52843	0.600089	1.24698	139
A59	0.730208	0.25016	0.244147	0.495084		3.19536	3.62739	0.00707929	3.02033	0.778313	1.52388	104
A60	0.722247	0.256435	0.307692	0.49629		3.23893	3.68677	0.00719517	3.10017	0.791053	1.55981	44
A61	0.76736	0.32438	0.240803	0.465163		3.21575	3.65232	0.00712795	3.04656	0.783663	1.53633	89
A62	0	0.184972	0.570234	0.530373		2.39268	2.78983	0.00544468	2.54883	0.5986	1.25349	138
A63	0.861566	0.266946	1	0.652712		3.61491	4.32379	0.00843839	4.27534	0.927735	2.05944	2
A64	0.757629	0.282814	0.25602	0.489896		3.22218	3.6647	0.00715211	3.07245	0.786318	1.54717	67
A65	0.668288	0.205076	0.32107	0.50009		3.20857	3.64412	0.00711193	3.03955	0.781901	1.53282	92
A66	0.739496	0.238369	0.26087	0.490981		3.20001	3.63397	0.00709212	3.02979	0.779724	1.52809	97
A67	0.717824	0.239528	0.265886	0.490801		3.19927	3.63103	0.0070864	3.02091	0.779094	1.52453	103
A68	0.723574	0.295404	0.215719	0.490318		3.19169	3.62101	0.00706685	3.00826	0.776945	1.51876	115
A69	0.761168	0.352758	0.227425	0.483803		3.22838	3.67329	0.00716887	3.08434	0.788161	1.55249	55
A70	0.704113	0.242526	0.252508	0.495506		3.19184	3.62059	0.00706602	3.00607	0.776854	1.51792	116
A71	0.739938	0.252478	0.244147	0.49261		3.19703	3.62997	0.00708432	3.02456	0.778866	1.52572	100
A72	0.752764	0.297122	0.254181	0.475357		3.21705	3.65443	0.00713206	3.05027	0.784114	1.53793	83
A73	0.741265	0.251079	0.269231	0.499005		3.21784	3.65965	0.00714224	3.06786	0.785234	1.5449	72
A74	0.69969	0.152518	0.240803	0.482596		3.11642	3.52136	0.00687235	2.88167	0.755562	1.46112	132
A75	0.783724	0.321543	0.331104	0.492248		3.29279	3.76529	0.00734841	3.21888	0.807901	1.61206	14
A76	0.773552	0.332814	0.267559	0.468842		3.24139	3.68847	0.0071985	3.09829	0.791419	1.55934	47
A77	0.689076	0.233933	0.334448	0.502081		3.23891	3.68669	0.00719503	3.09995	0.791037	1.55973	45
A78	0.707651	0.245524	0.237458	0.496712		3.18432	3.61097	0.00704724	2.99473	0.774789	1.51267	119
A79	0.725343	0.269984	0.229097	0.494541		3.19302	3.62357	0.00707185	3.01359	0.777494	1.52099	111
A80	0.757629	0.310432	0.352843	0.493937		3.29579	3.76826	0.00735422	3.22003	0.808539	1.61283	12
A81	0.693498	0.235252	0.254181	0.507088		3.19409	3.62529	0.00707519	3.01658	0.777862	1.52228	109
A82	0.77134	0.378337	0.299331	0.482838		3.28795	3.75589	0.00733008	3.19906	0.805885	1.60379	19
A83	0.671827	0.275939	0.234114	0.545636		3.21964	3.66555	0.00715377	3.08462	0.786501	1.55167	58
A84	0.754533	0.366946	0.17893	0.483863		3.19282	3.6271	0.00707873	3.02807	0.778251	1.52665	99
A85	0.749668	0.26215	0.309365	0.491645		3.24562	3.69729	0.0072157	3.1179	0.79331	1.56747	36
A86	0.743476	0.242446	0.234114	0.495868		3.18735	3.61817	0.00706129	3.01224	0.776334	1.51986	113
A87	0.773552	0.278137	0.27592	0.544731		3.27073	3.74347	0.00730583	3.21056	0.803219	1.60645	17
A88	0.743476	0.272102	0.25602	0.490499		3.21452	3.65324	0.00712974	3.05443	0.783859	1.53929	79
A89	0.738169	0.25004	0.277592	0.486759		3.21424	3.65217	0.00712765	3.05124	0.783629	1.53801	82
A90	0.737727	0.25004	0.277592	0.486638		3.21407	3.65187	0.00712707	3.05068	0.783566	1.53777	85
A91	0.735958	0.25004	0.264214	0.486517		3.20483	3.63902	0.00710199	3.03272	0.780809	1.52975	94
A92	0.791685	0.375659	0.130435	0.482234		3.15366	3.58286	0.00699239	2.99187	0.768759	1.50829	122
A93	0.756745	0.252598	0.252508	0.485673		3.20198	3.63675	0.00709756	3.0338	0.780322	1.52987	93
A94	0.719151	0.286571	0.245819	0.486819		3.20675	3.63979	0.00710349	3.02902	0.780973	1.5285	96
A95	0.765148	0.335132	0.250836	0.480364		3.23683	3.68377	0.00718932	3.0958	0.790409	1.55788	51
A96	0.695268	0.289768	0.11204	0.530796		3.10662	3.52236	0.00687432	2.91973	0.755777	1.475	131
A97	0.756745	0.418625	0.25602	0.485371		3.27288	3.73549	0.00729026	3.17199	0.801507	1.59157	29
A98	0.728881	0.566906	0.170569	0.500271		3.25283	3.72056	0.00726112	3.18357	0.798303	1.59397	27
A99	1	0.389688	0.809365	1		3.80691	4.66058	0.00909569	4.92026	1	2.33149	1
A100	0.741265	0.276139	0.235786	0.491343		3.20225	3.63667	0.00709741	3.03255	0.780304	1.52941	95
A101	0.738611	0.264948	0.292642	0.495265		3.23689	3.68466	0.00719105	3.09907	0.7906	1.55916	49
A102	0.736842	0.139888	0.757525	0.510587		3.36065	3.90813	0.00762718	3.53964	0.838549	1.74483	5
A103	0.721362	0.288289	0.32107	0.526151		3.28083	3.74979	0.00731817	3.20008	0.804576	1.60343	20
A104	0.760283	0.331695	0.26087	0.488146		3.24635	3.69773	0.00721656	3.11708	0.793405	1.56723	37
A105	0.775763	0.373261	0.250836	0.481269		3.25442	3.70971	0.00723994	3.1357	0.795975	1.57539	30
A106	0.744361	0.204956	0.653846	0.507148		3.37365	3.90612	0.00762326	3.48653	0.838118	1.72546	6
A107	0.743476	0.254956	0.212375	0.490981		3.17423	3.59967	0.0070252	2.9858	0.772366	1.5081	123
A108	0.735515	0.279936	0.282609	0.487905		3.23247	3.67657	0.00717527	3.08291	0.788865	1.55236	56
A109	0.75188	0.395204	0.284281	0.490258		3.28552	3.75253	0.00732351	3.19442	0.805163	1.60171	22
A110	0.741265	0.306914	0.25602	0.487543		3.2282	3.67097	0.00716435	3.07596	0.787664	1.54918	63
A111	0.731977	0.278537	0.270903	0.494842		3.22796	3.67136	0.0071651	3.0783	0.787747	1.55007	61
A112	0.728881	0.313709	0.264214	0.485733		3.23291	3.67601	0.00717417	3.07918	0.788744	1.55095	60
A113	0.807165	0.33797	0.225753	0.468722		3.22058	3.66371	0.00715017	3.07415	0.786105	1.54766	66
A114	0.734631	0.316986	0.240803	0.482476		3.21721	3.65465	0.00713248	3.05056	0.784161	1.53806	81
A115	0.741265	0.309113	0.327759	0.492852		3.27725	3.74023	0.00729951	3.17525	0.802524	1.59332	28
A116	0.667846	0.283533	0.232441	0.494179		3.18904	3.61308	0.00705137	2.98654	0.775243	1.50996	121
A117	0.74038	0.229816	0.192308	0.503831		3.15192	3.57334	0.0069738	2.9608	0.766715	1.49593	128
A118	0.800531	0.684852	0.229097	0.489956		3.33802	3.84662	0.00750714	3.37855	0.825351	1.67941	8
A119	0.749668	0.334692	0.247492	0.490499		3.23769	3.68555	0.0071928	3.09976	0.790792	1.55952	46
A120	0.752764	0.314788	0.250836	0.487422		3.23035	3.67497	0.00717215	3.08405	0.788522	1.55258	54
A121	0.691287	0.272982	0.254181	0.494179		3.20479	3.63626	0.0070966	3.02209	0.780216	1.52557	101
A122	0.785051	0.62522	0.302676	0.481511		3.36481	3.87554	0.00756359	3.39808	0.831557	1.68991	7
A123	0.758514	0.292166	0.230769	0.529288		3.23353	3.68842	0.0071984	3.12544	0.791408	1.56914	34
A124	0.734188	0.302998	0.270903	0.494118		3.23919	3.68664	0.00719492	3.09876	0.791025	1.55929	48
A125	0.677134	0.220863	0.5	0.529046		3.32488	3.82068	0.00745651	3.32313	0.819786	1.65631	9
A126	0.725343	0.205076	0.27592	0.496954		3.19159	3.62405	0.00707277	3.02042	0.777596	1.52352	106
A127	0.768244	0.471543	0.219064	0.488749		3.26761	3.73314	0.00728567	3.18115	0.801002	1.5946	26
A128	0.757629	0.339289	0.252508	0.499306		3.25034	3.70526	0.00723126	3.13256	0.79502	1.57372	31
A129	0.716939	0.221183	0.332776	0.497738		3.23413	3.68211	0.00718608	3.09872	0.790054	1.55873	50
A130	0.711632	0.180536	0.195652	0.494541		3.11229	3.51781	0.00686544	2.88223	0.754801	1.4609	133
A131	0.759398	0.353997	0.259197	0.486517		3.25291	3.70667	0.00723401	3.12913	0.795323	1.57265	32
A132	0.8023	0.266627	0.834448	0.524522		3.4856	4.08927	0.00798071	3.811	0.877416	1.8643	3
A133	0.67448	0.157714	0.205686	0.495204		3.09623	3.49471	0.00682034	2.84802	0.749843	1.44578	134
A134	0.757629	0.270903	0.265886	0.48694		3.22124	3.66297	0.00714872	3.06896	0.785946	1.5457	71
A135	0.679788	0.301519	0.264214	0.493394		3.22176	3.65814	0.00713929	3.0483	0.78491	1.53766	86
A136	0.766475	0.321623	0.22408	0.481149		3.21259	3.65132	0.007126	3.05367	0.783448	1.53878	80
A137	0.729766	0.203357	0.327759	0.499306		3.22439	3.671	0.0071644	3.08929	0.787669	1.554	53
A138	0.745688	0.238209	0.394649	0.495807		3.28109	3.75087	0.00732027	3.20335	0.804807	1.60473	18
A139	0.709863	0.242326	0.292642	0.500452		3.22241	3.66401	0.00715076	3.06898	0.78617	1.54583	70
A140	0.727112	0.202678	0.284281	0.49635		3.19546	3.6296	0.0070836	3.02861	0.778787	1.52714	98
					Min Pi	2.39268	512.395
					Max Pi	3.80691

## Sheet: 19_06
2019/06	C1	C2	C3	C4
A1	-3.37	12.57	-1.25	-3.12
A2	-0.08	-1.64	0.11	-0.04
A3	0.21	5.11	0.11	3.88
A4	-0.14	-7.9	-0.13	-1.72
A5	0.3	0.62	-0.05	-0.24
A6	0.27	5.65	0.11	0.37
A7	-1.43	0.51	-1.12	-1.76
A8	1.24	8.5	-0.32	-0.66
A9	1.25	11.63	0.33	-0.37
A10	0.16	22.23	-0.88	-11.21
A11	0.29	2.48	0.15	0.61
A12	0.42	3.72	0.05	2.59
A13	0.08	-0.28	0.02	0.55
A14	-0.5	0.68	-0.49	0.38
A15	0.34	8.51	-0.09	-0.55
A16	0.69	5.22	-0.21	-0.08
A17	0.13	7.45	0.13	1.77
A18	0.3	2.29	0.11	0.46
A19	1.05	14.63	0.24	0.1
A20	0.24	18.4	1.44	-2.98
A21	0.38	9.91	-0.05	1.59
A22	0.08	2.98	-0.04	0.91
A23	0.21	4.74	-0.21	0.78
A24	0.1	2.06	-0.23	0.78
A25	0.01	1.02	0.001	10.54
A26	0.14	-1.39	-0.17	-0.04
A27	0.19	2.33	-0.11	1.04
A28	-0.04	-9.06	-0.01	2.62
A29	-0.97	3.31	-0.91	-0.3
A30	0.04	0.73	-0.06	1.38
A31	0.12	0.07	-0.01	-0.49
A32	-0.54	20.35	-0.06	16.69
A33	0.26	6.69	-0.01	1.3
A34	0.29	-2.6	-0.52	-0.43
A35	0.14	8.16	-0.18	0.47
A36	1.31	4.94	-0.15	-0.56
A37	0.04	-0.16	-0.06	2.44
A38	0.16	-4.84	-0.11	-0.12
A39	-0.14	-3.01	0.01	-0.16
A40	0.43	5.38	-0.04	0.2
A41	-0.06	1.61	-0.6	0.49
A42	-0.02	-11.88	-1.13	0.13
A43	0.43	2.75	0.41	0.68
A44	0.38	7.54	0.18	0.88
A45	0.34	3.07	-0.16	-0.22
A46	0.19	3.93	-0.11	0.14
A47	0.52	-1.95	0.38	-0.03
A48	4.31	1.66	-2.07	-35.02
A49	0.46	13.8	1.28	0.73
A50	0.26	4.36	-0.15	0.29
A51	0.24	10.41	-0.12	0.18
A52	0.1	13.91	0.5	-1.14
A53	0.51	8.35	0.02	-0.06
A54	0.07	1.29	-0.57	-1.58
A55	-0.97	1.82	-0.74	-0.53
A56	0.18	-40.78	0.16	1.94
A57	0.14	6.16	-0.19	2.46
A58	0.47	2.17	0.27	0.29
A59	0.13	8.47	-0.14	-0.19
A60	-0.68	4.59	-1.2	-2.33
A61	-0.14	6.03	0.08	1.97
A62	-12.44	16.02	-6.29	-8.76
A63	-3.13	0.33	-5.44	-29
A64	0.4	13.73	-0.5	0.33
A65	0.99	8.78	0.65	-0.39
A66	0.37	6.84	0.13	0.63
A67	0.02	3.9	-0.14	0.32
A68	-0.16	-12.05	0.12	0.55
A69	0.17	-0.85	0.04	1.06
A70	0.02	5.34	-1.4	-0.73
A71	0.23	0.19	0.15	0.3
A72	0.001	-1.07	0.09	2.29
A73	-0.46	6.38	-2.9	-2.56
A74	-0.1	-3.4	-0.05	1.05
A75	0.34	-0.03	0.22	0.96
A76	1	-0.79	0.46	4.67
A77	-0.8	5.99	-1.51	-3.16
A78	-0.6	11.37	-1.32	-1.44
A79	0.23	-0.21	0.08	0.05
A80	0.25	12.7	-0.82	0.01
A81	-0.29	5.28	-0.14	-1.65
A82	0.41	-3.77	-0.41	-1
A83	0.02	2.26	0.14	-6.07
A84	0.36	6.34	0.14	1.03
A85	0.44	16.07	0.13	0.68
A86	-0.34	7.8	-1.2	-1.77
A87	-0.07	-0.51	-0.05	-5.93
A88	0.29	4.85	0.09	0.58
A89	0.22	2.51	-0.04	0.96
A90	0.22	2.51	-0.04	0.98
A91	0.22	2.51	-0.04	0.96
A92	0.03	-1.14	0.07	1.28
A93	0.23	4.04	0.06	0.83
A94	0.27	4.09	0.06	0.84
A95	0.17	4.71	-0.08	1.18
A96	1.03	1.47	0.09	-4.24
A97	0.11	-11.41	0.07	1.18
A98	0.19	11.36	0.001	-0.64
A99	-1.61	-1.3	1.89	-42.35
A100	0.03	5.7	-0.05	0.38
A101	-0.07	-17.32	0.001	-0.03
A102	0.65	43.84	-2.81	-2.16
A103	3.06	-0.01	-0.36	-4.65
A104	0.07	1.45	-0.55	0.1
A105	0.33	1.69	0.77	3.03
A106	-0.13	-12.39	-0.66	-1.42
A107	0.32	6.27	0.12	0.56
A108	0.31	2.13	-0.09	0.76
A109	0.1	-21.37	0.16	0.7
A110	0.3	0.04	0.01	0.85
A111	0.41	1.87	-0.12	-0.05
A112	0.33	-0.35	0.25	3.92
A113	-0.52	5.54	-0.06	0.93
A114	0.19	-9.86	0.25	1.74
A115	0.25	-0.26	-0.02	0.3
A116	0.62	6.09	0.05	0.08
A117	-0.08	13.61	0.26	-0.68
A118	0.39	3.38	-0.05	0.59
A119	0.15	1.84	-0.64	0.08
A120	0.6	-0.28	0.3	1.53
A121	0.2	7.07	-1.2	-0.31
A122	0.01	-23.03	0.11	1.55
A123	0.49	12.84	-0.21	-3.68
A124	0.14	3.56	-0.06	-0.14
A125	0.001	4.72	-1.01	-4.9
A126	-0.2	-8.45	-1.52	-0.95
A127	-0.12	3.25	-1.5	-0.47
A128	-0.09	-3.23	-0.1	-0.74
A129	0.52	10.49	0.01	-0.19
A130	0.22	2.05	0.03	0.2
A131	0.11	0.47	-0.09	0.94
A132	0.78	9.8	0.7	-1.95
A133	0.39	7.16	-0.43	-0.14
A134	-0.01	2.4	0.03	1.56
A135	0.86	3.43	-0.05	0.16
A136	0.14	1.79	-0.01	1.5
A137	0.4	15.91	0.48	-0.3
A138	0.05	10.34	-1.41	-0.52
A139	0.47	7.74	-0.41	-0.83
A140	0.32	5.43	-0.13	-0.22
MAX	4.31	43.84	1.89	16.69
MIN	-12.44	-40.78	-6.29	-42.35
	1	1	1	1
	Normalization
	C1	C2	C3	C4
A1	0.541493	0.630466	0.616137	0.664465
A2	0.73791	0.462538	0.782396	0.716633
A3	0.755224	0.542307	0.782396	0.783028
A4	0.734328	0.388561	0.753056	0.688178
A5	0.760597	0.489246	0.762836	0.713245
A6	0.758806	0.548688	0.782396	0.723577
A7	0.657313	0.487946	0.632029	0.6875
A8	0.816716	0.582368	0.729829	0.706131
A9	0.817313	0.619357	0.809291	0.711043
A10	0.752239	0.744623	0.661369	0.527439
A11	0.76	0.511227	0.787286	0.727642
A12	0.767761	0.52588	0.775061	0.761179
A13	0.747463	0.47861	0.771394	0.726626
A14	0.712836	0.489955	0.709046	0.723747
A15	0.762985	0.582486	0.757946	0.707995
A16	0.783881	0.543607	0.743276	0.715955
A17	0.750448	0.56996	0.784841	0.74729
A18	0.760597	0.508981	0.782396	0.725102
A19	0.805373	0.65481	0.798289	0.719004
A20	0.757015	0.699362	0.944988	0.666836
A21	0.765373	0.599031	0.762836	0.744241
A22	0.747463	0.517135	0.764059	0.732724
A23	0.755224	0.537934	0.743276	0.730522
A24	0.748657	0.506263	0.740831	0.730522
A25	0.743284	0.493973	0.769071	0.895833
A26	0.751045	0.465493	0.748166	0.716633
A27	0.75403	0.509454	0.755501	0.734925
A28	0.740299	0.374852	0.767726	0.761687
A29	0.684776	0.521035	0.657702	0.712229
A30	0.745075	0.490546	0.761614	0.740684
A31	0.749851	0.482746	0.767726	0.709011
A32	0.710448	0.722406	0.761614	1
A33	0.758209	0.560978	0.767726	0.739329
A34	0.76	0.451194	0.705379	0.710027
A35	0.751045	0.57835	0.746944	0.725271
A36	0.820896	0.540298	0.750611	0.707825
A37	0.745075	0.480028	0.761614	0.758638
A38	0.752239	0.424722	0.755501	0.715278
A39	0.734328	0.446348	0.770171	0.7146
A40	0.768358	0.545498	0.764059	0.720698
A41	0.739104	0.500945	0.695599	0.72561
A42	0.741493	0.341527	0.630807	0.719512
A43	0.768358	0.514417	0.819071	0.728828
A44	0.765373	0.571023	0.790954	0.732215
A45	0.762985	0.518199	0.749389	0.713584
A46	0.75403	0.528362	0.755501	0.719682
A47	0.773731	0.458875	0.815403	0.716802
A48	1	0.501536	0.515892	0.124153
A49	0.770149	0.645001	0.925428	0.729675
A50	0.758209	0.533444	0.750611	0.722222
A51	0.757015	0.60494	0.754279	0.720359
A52	0.748657	0.646301	0.830073	0.698001
A53	0.773134	0.580596	0.771394	0.716294
A54	0.746866	0.497164	0.699267	0.690549
A55	0.684776	0.503427	0.678484	0.708333
A56	0.753433	0	0.788509	0.750169
A57	0.751045	0.554715	0.745721	0.758977
A58	0.770746	0.507563	0.801956	0.722222
A59	0.750448	0.582014	0.751834	0.714092
A60	0.70209	0.536162	0.622249	0.677846
A61	0.734328	0.553179	0.778729	0.750678
A62	0	0.671236	0	0.568936
A63	0.555821	0.485819	0.103912	0.226118
A64	0.766567	0.644174	0.707824	0.7229
A65	0.801791	0.585677	0.848411	0.710705
A66	0.764776	0.562751	0.784841	0.727981
A67	0.743881	0.528008	0.751834	0.72273
A68	0.733134	0.339518	0.783619	0.726626
A69	0.752836	0.471874	0.773839	0.735264
A70	0.743881	0.545025	0.5978	0.704946
A71	0.756418	0.484165	0.787286	0.722392
A72	0.742746	0.469274	0.779951	0.756098
A73	0.715224	0.557315	0.414425	0.67395
A74	0.736716	0.44174	0.762836	0.735095
A75	0.762985	0.481565	0.795844	0.73357
A76	0.802388	0.472583	0.825183	0.796409
A77	0.694925	0.552706	0.584352	0.663787
A78	0.706866	0.616285	0.607579	0.69292
A79	0.756418	0.479437	0.778729	0.718157
A80	0.757612	0.632002	0.668704	0.71748
A81	0.725373	0.544316	0.751834	0.689363
A82	0.767164	0.437367	0.718826	0.700373
A83	0.743881	0.508627	0.786064	0.614499
A84	0.764179	0.556842	0.786064	0.734756
A85	0.768955	0.671827	0.784841	0.728828
A86	0.722388	0.574096	0.622249	0.687331
A87	0.738507	0.475892	0.762836	0.61687
A88	0.76	0.539234	0.779951	0.727134
A89	0.755821	0.511581	0.764059	0.73357
A90	0.755821	0.511581	0.764059	0.733909
A91	0.755821	0.511581	0.764059	0.73357
A92	0.744478	0.468447	0.777506	0.738991
A93	0.756418	0.529662	0.776284	0.731369
A94	0.758806	0.530253	0.776284	0.731538
A95	0.752836	0.53758	0.759169	0.737297
A96	0.804179	0.499291	0.779951	0.645495
A97	0.749254	0.347081	0.777506	0.737297
A98	0.75403	0.616166	0.769071	0.70647
A99	0.646567	0.466556	1	0
A100	0.744478	0.549279	0.762836	0.723747
A101	0.738507	0.277239	0.769071	0.716802
A102	0.781493	1	0.425428	0.680725
A103	0.925373	0.481801	0.724939	0.63855
A104	0.746866	0.499055	0.701711	0.719004
A105	0.762388	0.501891	0.863081	0.768631
A106	0.734925	0.3355	0.688264	0.693259
A107	0.761791	0.556015	0.783619	0.726795
A108	0.761194	0.507091	0.757946	0.730183
A109	0.748657	0.229378	0.788509	0.729167
A110	0.760597	0.482392	0.770171	0.731707
A111	0.767164	0.504018	0.754279	0.716463
A112	0.762388	0.477783	0.799511	0.783706
A113	0.711642	0.547388	0.761614	0.733062
A114	0.75403	0.365398	0.799511	0.746782
A115	0.757612	0.478847	0.766504	0.722392
A116	0.779701	0.553888	0.775061	0.718665
A117	0.73791	0.642756	0.800733	0.705793
A118	0.76597	0.521862	0.762836	0.727304
A119	0.751642	0.503663	0.690709	0.718665
A120	0.778507	0.47861	0.805623	0.743225
A121	0.754627	0.565469	0.622249	0.71206
A122	0.743284	0.209761	0.782396	0.743564
A123	0.77194	0.633656	0.743276	0.65498
A124	0.751045	0.52399	0.761614	0.714939
A125	0.742746	0.537698	0.645477	0.634316
A126	0.730746	0.382061	0.58313	0.70122
A127	0.735522	0.520326	0.585575	0.70935
A128	0.737313	0.443749	0.756724	0.704776
A129	0.773731	0.605885	0.770171	0.714092
A130	0.755821	0.506145	0.772616	0.720698
A131	0.749254	0.487473	0.757946	0.733232
A132	0.789254	0.597731	0.854523	0.684282
A133	0.76597	0.566533	0.716381	0.714939
A134	0.74209	0.510281	0.772616	0.743733
A135	0.79403	0.522453	0.762836	0.72002
A136	0.751045	0.503073	0.767726	0.742717
A137	0.766567	0.669936	0.827628	0.712229
A138	0.745672	0.604113	0.596577	0.708503
A139	0.770746	0.573387	0.718826	0.703252
A140	0.761791	0.546088	0.753056	0.713584
	0.163265	0.163265	0.244898	0.428571
	Weighted normalized matrix
	C1	C2	C3	C4		Si	λ
A1	0.0884068	0.102933	0.150891	0.28477		0.627001	0.5
A2	0.120475	0.0755163	0.191607	0.307128		0.694727
A3	0.123302	0.0885397	0.191607	0.335583		0.739032
A4	0.11989	0.0634384	0.184422	0.294933		0.662683
A5	0.124179	0.0798768	0.186817	0.305676		0.696549
A6	0.123886	0.0895816	0.191607	0.310104		0.71518
A7	0.107316	0.0796645	0.154783	0.294643		0.636406
A8	0.133341	0.0950803	0.178734	0.302627		0.709783
A9	0.133439	0.101119	0.198194	0.304733		0.737484
A10	0.122814	0.121571	0.161968	0.226045		0.632398
A11	0.124081	0.0834654	0.192805	0.311846		0.712198
A12	0.125349	0.0858579	0.189811	0.326219		0.727237
A13	0.122034	0.0781403	0.188913	0.311411		0.700498
A14	0.116381	0.0799925	0.173644	0.310177		0.680195
A15	0.124569	0.0950996	0.18562	0.303426		0.708714
A16	0.12798	0.0887519	0.182027	0.306838		0.705597
A17	0.122522	0.0930545	0.192206	0.320267		0.728049
A18	0.124179	0.0830988	0.191607	0.310758		0.709642
A19	0.131489	0.106908	0.195499	0.308144		0.74204
A20	0.123594	0.114181	0.231426	0.285787		0.754988
A21	0.124959	0.0978008	0.186817	0.31896		0.728537
A22	0.122034	0.0844301	0.187116	0.314024		0.707605
A23	0.123302	0.0878258	0.182027	0.31308		0.706235
A24	0.122229	0.0826551	0.181428	0.31308		0.699393
A25	0.121352	0.0806485	0.188344	0.383928		0.774273
A26	0.122619	0.0759987	0.183224	0.307128		0.68897
A27	0.123107	0.083176	0.185021	0.314968		0.706271
A28	0.120865	0.0612003	0.188015	0.326437		0.696517
A29	0.1118	0.0850668	0.16107	0.305241		0.663177
A30	0.121645	0.080089	0.186518	0.317436		0.705687
A31	0.122424	0.0788156	0.188015	0.303861		0.693116
A32	0.115991	0.117944	0.186518	0.428571		0.849024
A33	0.123789	0.0915882	0.188015	0.316855		0.720247
A34	0.124081	0.0736641	0.172746	0.304297		0.674788
A35	0.122619	0.0944244	0.182925	0.31083		0.710799
A36	0.134024	0.0882117	0.183823	0.303353		0.709412
A37	0.121645	0.0783718	0.186518	0.32513		0.711664
A38	0.122814	0.0693423	0.185021	0.306547		0.683725
A39	0.11989	0.0728731	0.188613	0.306257		0.687634
A40	0.125446	0.0890607	0.187116	0.30887		0.710493
A41	0.12067	0.0817869	0.170351	0.310975		0.683783
A42	0.12106	0.0557594	0.154483	0.308362		0.639665
A43	0.125446	0.0839864	0.200589	0.312355		0.722376
A44	0.124959	0.0932281	0.193703	0.313806		0.725696
A45	0.124569	0.0846038	0.183524	0.305821		0.698518
A46	0.123107	0.086263	0.185021	0.308435		0.702825
A47	0.126323	0.0749182	0.199691	0.307201		0.708133
A48	0.163265	0.0818833	0.126341	0.0532084		0.424698
A49	0.125738	0.105306	0.226635	0.312717		0.770397
A50	0.123789	0.0870927	0.183823	0.309524		0.704228
A51	0.123594	0.0987655	0.184721	0.308725		0.715806
A52	0.122229	0.105518	0.203283	0.299143		0.730174
A53	0.126226	0.0947909	0.188913	0.306983		0.716912
A54	0.121937	0.0811694	0.171249	0.295949		0.670305
A55	0.1118	0.082192	0.166159	0.303571		0.663723
A56	0.123009	0	0.193104	0.321501		0.637614
A57	0.122619	0.0905656	0.182626	0.325276		0.721086
A58	0.125836	0.0828673	0.196397	0.309524		0.714624
A59	0.122522	0.0950225	0.184123	0.306039		0.707706
A60	0.114627	0.0875364	0.152388	0.290505		0.645056
A61	0.11989	0.0903148	0.190709	0.321719		0.722633
A62	0	0.109589	0	0.24383		0.353419
A63	0.0907461	0.0793172	0.0254478	0.0969076		0.292419
A64	0.125154	0.105171	0.173345	0.309814		0.713483
A65	0.130904	0.0956206	0.207774	0.304587		0.738886
A66	0.124861	0.0918776	0.192206	0.311992		0.720936
A67	0.12145	0.0862052	0.184123	0.309741		0.701519
A68	0.119695	0.0554314	0.191907	0.311411		0.678444
A69	0.122912	0.0770406	0.189512	0.315113		0.704577
A70	0.12145	0.0889835	0.1464	0.302119		0.658952
A71	0.123497	0.0790471	0.192805	0.309596		0.704945
A72	0.121264	0.0766161	0.191008	0.324041		0.712931
A73	0.116771	0.09099	0.101492	0.288835		0.598088
A74	0.12028	0.0721206	0.186817	0.31504		0.694258
A75	0.124569	0.0786227	0.1949	0.314387		0.712479
A76	0.131002	0.0771563	0.202086	0.341318		0.751562
A77	0.113457	0.0902376	0.143107	0.28448		0.631281
A78	0.115406	0.100618	0.148795	0.296965		0.661785
A79	0.123497	0.0782754	0.190709	0.307781		0.700262
A80	0.123692	0.103184	0.163764	0.307491		0.698131
A81	0.118428	0.0888677	0.184123	0.295441		0.686859
A82	0.125251	0.0714067	0.176039	0.300159		0.672856
A83	0.12145	0.083041	0.192505	0.263356		0.660352
A84	0.124764	0.0909129	0.192505	0.314895		0.723077
A85	0.125543	0.109686	0.192206	0.312355		0.73979
A86	0.117941	0.0937298	0.152388	0.29457		0.658628
A87	0.120572	0.0776965	0.186817	0.264373		0.649459
A88	0.124081	0.0880381	0.191008	0.311629		0.714757
A89	0.123399	0.0835233	0.187116	0.314387		0.708426
A90	0.123399	0.0835233	0.187116	0.314532		0.708571
A91	0.123399	0.0835233	0.187116	0.314387		0.708426
A92	0.121547	0.076481	0.19041	0.31671		0.705148
A93	0.123497	0.0864753	0.19011	0.313443		0.713526
A94	0.123886	0.0865717	0.19011	0.313516		0.714084
A95	0.122912	0.087768	0.185919	0.315984		0.712583
A96	0.131294	0.0815167	0.191008	0.27664		0.68046
A97	0.122327	0.0566662	0.19041	0.315984		0.685387
A98	0.123107	0.100598	0.188344	0.302773		0.714822
A99	0.105562	0.0761723	0.244898	0		0.426632
A100	0.121547	0.0896781	0.186817	0.310177		0.708219
A101	0.120572	0.0452635	0.188344	0.307201		0.66138
A102	0.12759	0.163265	0.104186	0.291739		0.686781
A103	0.151081	0.0786612	0.177536	0.273664		0.680942
A104	0.121937	0.0814781	0.171848	0.308144		0.683407
A105	0.124471	0.0819412	0.211367	0.329413		0.747192
A106	0.119988	0.0547754	0.168554	0.297111		0.640428
A107	0.124374	0.0907778	0.191907	0.311483		0.718542
A108	0.124276	0.0827901	0.18562	0.312935		0.705621
A109	0.122229	0.0374495	0.193104	0.3125		0.665283
A110	0.124179	0.0787577	0.188613	0.313589		0.705138
A111	0.125251	0.0822885	0.184721	0.307055		0.699316
A112	0.124471	0.0780052	0.195799	0.335874		0.734149
A113	0.116186	0.0893694	0.186518	0.314169		0.706242
A114	0.123107	0.0596567	0.195799	0.320049		0.698611
A115	0.123692	0.0781789	0.187715	0.309596		0.699182
A116	0.127298	0.0904305	0.189811	0.307999		0.715539
A117	0.120475	0.10494	0.196098	0.302482		0.723995
A118	0.125056	0.0852019	0.186817	0.311701		0.708776
A119	0.122717	0.0822306	0.169153	0.307999		0.6821
A120	0.127103	0.0781403	0.197296	0.318525		0.721064
A121	0.123204	0.0923213	0.152388	0.305168		0.673081
A122	0.121352	0.0342467	0.191607	0.31867		0.665876
A123	0.126031	0.103454	0.182027	0.280705		0.692217
A124	0.122619	0.0855492	0.186518	0.306402		0.701088
A125	0.121264	0.0877873	0.158076	0.271849		0.638977
A126	0.119305	0.0623772	0.142807	0.300522		0.625012
A127	0.120085	0.0849511	0.143406	0.304007		0.652449
A128	0.120377	0.0724486	0.18532	0.302047		0.680193
A129	0.126323	0.0989198	0.188613	0.306039		0.719896
A130	0.123399	0.0826358	0.189212	0.30887		0.704117
A131	0.122327	0.0795873	0.18562	0.314242		0.701776
A132	0.128858	0.0975886	0.209271	0.293263		0.72898
A133	0.125056	0.092495	0.17544	0.306402		0.699394
A134	0.121157	0.0833111	0.189212	0.318742		0.712423
A135	0.129637	0.0852983	0.186817	0.30858		0.710333
A136	0.122619	0.0821341	0.188015	0.318307		0.711075
A137	0.125154	0.109377	0.202685	0.305241		0.742456
A138	0.121742	0.0986304	0.146101	0.303644		0.670117
A139	0.125836	0.093614	0.176039	0.301393		0.696882
A140	0.124374	0.0891571	0.184422	0.305821		0.703774
					Min Si	0.292419
	Normalized matrix				Max Si	0.849024
	C1	C2	C3	C4		Pi	Si+Pi	kia	kib	kic	ki	rank
A1	0.541493	0.630466	0.616137	0.664465		3.55961	4.18662	0.0069452	4.211	0.894859	2.00117	133
A2	0.73791	0.462538	0.782396	0.716633		3.64191	4.33664	0.00719407	4.49039	0.926925	2.1187	90
A3	0.755224	0.542307	0.782396	0.783028		3.70228	4.44131	0.00736771	4.67695	0.949298	2.19769	11
A4	0.734328	0.388561	0.753056	0.688178		3.59273	4.25541	0.00705932	4.35225	0.909563	2.05975	118
A5	0.760597	0.489246	0.762836	0.713245		3.64717	4.34372	0.00720581	4.49967	0.928438	2.12285	88
A6	0.758806	0.548688	0.782396	0.723577		3.67479	4.38996	0.00728253	4.57942	0.938323	2.1568	34
A7	0.657313	0.487946	0.632029	0.6875		3.56861	4.20501	0.00697572	4.24838	0.898791	2.0167	129
A8	0.816716	0.582368	0.729829	0.706131		3.67023	4.38002	0.00726603	4.55832	0.936197	2.14809	49
A9	0.817313	0.619357	0.809291	0.711043		3.70589	4.44338	0.00737114	4.67376	0.94974	2.1968	12
A10	0.752239	0.744623	0.661369	0.527439		3.57149	4.20389	0.00697385	4.23635	0.898551	2.01227	131
A11	0.76	0.511227	0.787286	0.727642		3.66815	4.38035	0.00726659	4.56537	0.936269	2.15064	42
A12	0.767761	0.52588	0.775061	0.761179		3.68729	4.41453	0.00732328	4.62791	0.943574	2.17701	18
A13	0.747463	0.47861	0.771394	0.726626		3.65074	4.35124	0.0072183	4.51525	0.930047	2.1293	80
A14	0.712836	0.489955	0.709046	0.723747		3.62613	4.30633	0.00714379	4.43153	0.920447	2.0941	106
A15	0.762985	0.582486	0.757946	0.707995		3.66916	4.37787	0.00726247	4.55404	0.935738	2.14631	52
A16	0.783881	0.543607	0.743276	0.715955		3.6628	4.3684	0.00724675	4.53969	0.933713	2.14006	65
A17	0.750448	0.56996	0.784841	0.74729		3.69154	4.41959	0.00733168	4.63316	0.944655	2.17949	17
A18	0.760597	0.508981	0.782396	0.725102		3.66489	4.37453	0.00725693	4.55474	0.935024	2.14616	53
A19	0.805373	0.65481	0.798289	0.719004		3.71297	4.45501	0.00739043	4.69345	0.952226	2.2052	8
A20	0.757015	0.699362	0.944988	0.666836		3.72568	4.48067	0.007433	4.7451	0.95771	2.22667	4
A21	0.765373	0.599031	0.762836	0.744241		3.69397	4.4225	0.00733651	4.63623	0.945278	2.18093	16
A22	0.747463	0.517135	0.764059	0.732724		3.66296	4.37056	0.00725035	4.54665	0.934176	2.1428	60
A23	0.755224	0.537934	0.743276	0.730522		3.66294	4.36917	0.00724804	4.54195	0.933879	2.14096	63
A24	0.748657	0.506263	0.740831	0.730522		3.65192	4.35131	0.00721841	4.51216	0.930061	2.12821	82
A25	0.743284	0.493973	0.769071	0.895833		3.73562	4.5099	0.00748149	4.81683	0.963958	2.25571	2
A26	0.751045	0.465493	0.748166	0.716633		3.63531	4.32429	0.00717358	4.46687	0.924285	2.10884	95
A27	0.75403	0.509454	0.755501	0.734925		3.66068	4.36695	0.00724435	4.54076	0.933404	2.14027	64
A28	0.740299	0.374852	0.767726	0.761687		3.63127	4.32778	0.00717938	4.49033	0.925033	2.11762	92
A29	0.684776	0.521035	0.657702	0.712229		3.6062	4.26938	0.00708249	4.36176	0.912549	2.06481	115
A30	0.745075	0.490546	0.761614	0.740684		3.65808	4.36377	0.00723908	4.53726	0.932724	2.13864	67
A31	0.749851	0.482746	0.767726	0.709011		3.64227	4.33538	0.00719199	4.48509	0.926657	2.11666	94
A32	0.710448	0.722406	0.761614	1		3.8295	4.67852	0.00776122	5.12696	1	2.38631	1
A33	0.758209	0.560978	0.767726	0.739329		3.68166	4.40191	0.00730235	4.60074	0.940877	2.16583	27
A34	0.76	0.451194	0.705379	0.710027		3.61591	4.2907	0.00711786	4.40711	0.917105	2.08352	109
A35	0.751045	0.57835	0.746944	0.725271		3.67125	4.38205	0.0072694	4.56238	0.936631	2.14978	45
A36	0.820896	0.540298	0.750611	0.707825		3.66717	4.37658	0.00726034	4.55527	0.935463	2.1466	51
A37	0.745075	0.480028	0.761614	0.758638		3.66401	4.37567	0.00725883	4.56114	0.935269	2.14858	47
A38	0.752239	0.424722	0.755501	0.715278		3.62398	4.3077	0.00714607	4.44235	0.92074	2.09812	101
A39	0.734328	0.446348	0.770171	0.7146		3.63136	4.319	0.00716481	4.46001	0.923155	2.10576	97
A40	0.768358	0.545498	0.764059	0.720698		3.66894	4.37943	0.00726506	4.56	0.936072	2.14862	46
A41	0.739104	0.500945	0.695599	0.72561		3.63163	4.31541	0.00715886	4.44699	0.922388	2.10069	99
A42	0.741493	0.341527	0.630807	0.719512		3.55318	4.19284	0.00695553	4.25057	0.89619	2.01603	130
A43	0.768358	0.514417	0.819071	0.728828		3.68057	4.40294	0.00730407	4.60739	0.941098	2.16832	23
A44	0.765373	0.571023	0.790954	0.732215		3.68901	4.4147	0.00732357	4.62364	0.943611	2.17551	19
A45	0.762985	0.518199	0.749389	0.713584		3.65216	4.35068	0.00721736	4.5093	0.929926	2.12712	85
A46	0.75403	0.528362	0.755501	0.719682		3.65819	4.36101	0.0072345	4.52753	0.932135	2.13485	75
A47	0.773731	0.458875	0.815403	0.716802		3.65783	4.36596	0.00724271	4.54547	0.933193	2.14183	61
A48	1	0.501536	0.515892	0.124153		3.15279	3.57749	0.00593471	3.28296	0.764662	1.59725	137
A49	0.770149	0.645001	0.925428	0.729675		3.74402	4.51442	0.007489	4.80845	0.964925	2.25327	3
A50	0.758209	0.533444	0.750611	0.722222		3.66029	4.36451	0.00724032	4.53355	0.932883	2.13741	69
A51	0.757015	0.60494	0.754279	0.720359		3.67892	4.39472	0.00729042	4.58396	0.93934	2.15899	31
A52	0.748657	0.646301	0.830073	0.698001		3.69767	4.42784	0.00734537	4.64398	0.946419	2.18433	14
A53	0.773134	0.580596	0.771394	0.716294		3.67909	4.396	0.00729255	4.58784	0.939613	2.16052	30
A54	0.746866	0.497164	0.699267	0.690549		3.61502	4.28533	0.00710895	4.39126	0.915958	2.07723	113
A55	0.684776	0.503427	0.678484	0.708333		3.60604	4.26976	0.00708313	4.36353	0.912631	2.06549	114
A56	0.753433	0	0.788509	0.750169		2.78239	3.42	0.00567346	3.79602	0.731001	1.76153	136
A57	0.751045	0.554715	0.745721	0.758977		3.6818	4.40288	0.00730397	4.60369	0.941085	2.16699	25
A58	0.770746	0.507563	0.801956	0.722222		3.67078	4.3854	0.00727497	4.57519	0.937348	2.15475	37
A59	0.750448	0.582014	0.751834	0.714092		3.66777	4.37548	0.00725851	4.54979	0.935228	2.14451	56
A60	0.70209	0.536162	0.622249	0.677846		3.58394	4.229	0.00701551	4.28687	0.903918	2.03328	126
A61	0.734328	0.553179	0.778729	0.750678		3.68363	4.40626	0.00730957	4.61004	0.941807	2.16966	22
A62	0	0.671236	0	0.568936		1.72227	2.07569	0.00344338	2.20861	0.443665	1.03522	140
A63	0.555821	0.485819	0.103912	0.226118		2.90054	3.19296	0.00529681	2.68413	0.682471	1.33725	139
A64	0.766567	0.644174	0.707824	0.7229		3.67727	4.39075	0.00728384	4.57506	0.938492	2.15534	36
A65	0.801791	0.585677	0.848411	0.710705		3.70533	4.44421	0.00737253	4.67822	0.949919	2.19849	10
A66	0.764776	0.562751	0.784841	0.727981		3.68275	4.40369	0.0073053	4.60373	0.941256	2.1671	24
A67	0.743881	0.528008	0.751834	0.72273		3.65644	4.35796	0.00722944	4.52205	0.931482	2.13253	76
A68	0.733134	0.339518	0.783619	0.726626		3.60302	4.28146	0.00710254	4.41212	0.915132	2.08421	108
A69	0.752836	0.471874	0.773839	0.735264		3.65497	4.35954	0.00723207	4.53165	0.931821	2.13614	74
A70	0.743881	0.545025	0.5978	0.704946		3.60096	4.25991	0.00706679	4.34427	0.910526	2.05744	120
A71	0.756418	0.484165	0.787286	0.722392		3.65679	4.36173	0.0072357	4.53397	0.932289	2.13723	70
A72	0.742746	0.469274	0.779951	0.756098		3.66444	4.37737	0.00726164	4.56572	0.935631	2.15041	43
A73	0.715224	0.557315	0.414425	0.67395		3.50609	4.10418	0.00680844	4.08105	0.877238	1.94497	135
A74	0.736716	0.44174	0.762836	0.735095		3.63874	4.333	0.00718804	4.48695	0.926148	2.11704	93
A75	0.762985	0.481565	0.795844	0.73357		3.6656	4.37808	0.00726282	4.56485	0.935783	2.15019	44
A76	0.802388	0.472583	0.825183	0.796409		3.71059	4.46215	0.00740229	4.72463	0.953753	2.21716	5
A77	0.694925	0.552706	0.584352	0.663787		3.56569	4.19697	0.00696238	4.22916	0.897073	2.00888	132
A78	0.706866	0.616285	0.607579	0.69292		3.60859	4.27038	0.00708415	4.35839	0.912762	2.06373	116
A79	0.756418	0.479437	0.778729	0.718157		3.65066	4.35092	0.00721776	4.5144	0.929978	2.12896	81
A80	0.757612	0.632002	0.668704	0.71748		3.65703	4.35516	0.0072248	4.51081	0.930885	2.12819	83
A81	0.725373	0.544316	0.751834	0.689363		3.63957	4.32642	0.00717713	4.46212	0.924742	2.1074	96
A82	0.767164	0.437367	0.718826	0.700373		3.61213	4.28498	0.00710838	4.3983	0.915884	2.0797	111
A83	0.743881	0.508627	0.786064	0.614499		3.60274	4.26309	0.00707206	4.35009	0.911205	2.0599	117
A84	0.764179	0.556842	0.786064	0.734756		3.68489	4.40797	0.0073124	4.61229	0.942171	2.17067	21
A85	0.768955	0.671827	0.784841	0.728828		3.71075	4.45054	0.00738303	4.68446	0.951272	2.20147	9
A86	0.722388	0.574096	0.622249	0.687331		3.60354	4.26217	0.00707053	4.34466	0.911008	2.05785	119
A87	0.738507	0.475892	0.762836	0.61687		3.58638	4.23584	0.00702685	4.30334	0.90538	2.03997	125
A88	0.76	0.539234	0.779951	0.727134		3.67357	4.38833	0.00727982	4.57727	0.937973	2.15584	35
A89	0.755821	0.511581	0.764059	0.73357		3.66354	4.37197	0.00725268	4.5498	0.934477	2.14409	58
A90	0.755821	0.511581	0.764059	0.733909		3.66372	4.37229	0.00725321	4.55039	0.934545	2.14434	57
A91	0.755821	0.511581	0.764059	0.73357		3.66354	4.37197	0.00725268	4.5498	0.934477	2.14409	58
A92	0.744478	0.468447	0.777506	0.738991		3.65516	4.36031	0.00723334	4.53372	0.931985	2.13697	71
A93	0.756418	0.529662	0.776284	0.731369		3.67128	4.38481	0.00727398	4.57173	0.937221	2.15344	39
A94	0.758806	0.530253	0.776284	0.731538		3.67202	4.38611	0.00727614	4.57407	0.937499	2.15443	38
A95	0.752836	0.53758	0.759169	0.737297		3.67064	4.38322	0.00727135	4.56813	0.936883	2.15197	40
A96	0.804179	0.499291	0.779951	0.645495		3.62774	4.3082	0.00714689	4.43337	0.920846	2.09497	104
A97	0.749254	0.347081	0.777506	0.737297		3.61308	4.29847	0.00713075	4.44171	0.918767	2.09679	103
A98	0.75403	0.616166	0.769071	0.70647		3.6783	4.39312	0.00728777	4.58023	0.938998	2.15747	33
A99	0.646567	0.466556	1	0		2.81424	3.24088	0.00537631	3.093	0.692714	1.48954	138
A100	0.744478	0.549279	0.762836	0.723747		3.66624	4.37446	0.00725681	4.55065	0.935009	2.1447	55
A101	0.738507	0.277239	0.769071	0.716802		3.56749	4.22887	0.00701529	4.33314	0.90389	2.04977	123
A102	0.781493	1	0.425428	0.680725		3.61973	4.30652	0.0071441	4.45034	0.920487	2.10082	98
A103	0.925373	0.481801	0.724939	0.63855		3.62439	4.30533	0.00714213	4.43307	0.920233	2.09453	105
A104	0.746866	0.499055	0.701711	0.719004		3.63126	4.31466	0.00715762	4.44549	0.922228	2.10007	100
A105	0.762388	0.501891	0.863081	0.768631		3.70816	4.45535	0.007391	4.70827	0.952299	2.21052	6
A106	0.734925	0.3355	0.688264	0.693259		3.55491	4.19534	0.00695967	4.25419	0.896724	2.01761	128
A107	0.761791	0.556015	0.783619	0.726795		3.67938	4.39792	0.00729574	4.59359	0.940024	2.1628	29
A108	0.761194	0.507091	0.757946	0.730183		3.65978	4.36541	0.00724179	4.53802	0.933074	2.13911	66
A109	0.748657	0.229378	0.788509	0.729167		3.55703	4.22231	0.00700441	4.34041	0.902488	2.05158	121
A110	0.760597	0.482392	0.770171	0.731707		3.65684	4.36198	0.00723612	4.53466	0.932342	2.13751	68
A111	0.767164	0.504018	0.754279	0.716463		3.65193	4.35125	0.00721831	4.5119	0.930048	2.12811	84
A112	0.762388	0.477783	0.799511	0.783706		3.69057	4.42472	0.00734019	4.65345	0.945751	2.18733	13
A113	0.711642	0.547388	0.761614	0.733062		3.66316	4.3694	0.00724842	4.5421	0.933927	2.14104	62
A114	0.75403	0.365398	0.799511	0.746782		3.63244	4.33105	0.0071848	4.49817	0.92573	2.1208	89
A115	0.757612	0.478847	0.766504	0.722392		3.64928	4.34846	0.00721368	4.5099	0.929451	2.12706	86
A116	0.779701	0.553888	0.775061	0.718665		3.67572	4.39126	0.00728469	4.58119	0.938601	2.15759	32
A117	0.73791	0.642756	0.800733	0.705793		3.69029	4.41428	0.00732288	4.61857	0.943521	2.17366	20
A118	0.76597	0.521862	0.762836	0.727304		3.66496	4.37374	0.00725562	4.55182	0.934855	2.14502	54
A119	0.751642	0.503663	0.690709	0.718665		3.62987	4.31197	0.00715315	4.44022	0.921653	2.09787	102
A120	0.778507	0.47861	0.805623	0.743225		3.67562	4.39668	0.00729367	4.60002	0.939758	2.16494	28
A121	0.754627	0.565469	0.622249	0.71206		3.62107	4.29415	0.00712358	4.40426	0.917843	2.08292	110
A122	0.743284	0.209761	0.782396	0.743564		3.55007	4.21594	0.00699385	4.3384	0.901127	2.0501	122
A123	0.77194	0.633656	0.743276	0.65498		3.6509	4.34312	0.00720482	4.48702	0.92831	2.11827	91
A124	0.751045	0.52399	0.761614	0.714939		3.65573	4.35682	0.00722755	4.52017	0.931239	2.13172	78
A125	0.742746	0.537698	0.645477	0.634316		3.57737	4.21634	0.00699452	4.26226	0.901213	2.023	127
A126	0.730746	0.382061	0.58313	0.70122		3.53986	4.16487	0.00690913	4.19273	0.890211	1.99206	134
A127	0.735522	0.520326	0.585575	0.70935		3.59023	4.24267	0.00703819	4.3158	0.906841	2.04523	124
A128	0.737313	0.443749	0.756724	0.704776		3.622	4.30219	0.00713693	4.42912	0.919562	2.09274	107
A129	0.773731	0.605885	0.770171	0.714092		3.68409	4.40399	0.0073058	4.60095	0.941321	2.16615	26
A130	0.755821	0.506145	0.772616	0.720698		3.65792	4.36204	0.0072362	4.5318	0.932354	2.13649	73
A131	0.749254	0.487473	0.757946	0.733232		3.65313	4.35491	0.00722438	4.52101	0.93083	2.13179	77
A132	0.789254	0.597731	0.854523	0.684282		3.69368	4.42266	0.00733677	4.63758	0.945312	2.18143	15
A133	0.76597	0.566533	0.716381	0.714939		3.65642	4.35582	0.00722589	4.51477	0.931024	2.12968	79
A134	0.74209	0.510281	0.772616	0.743733		3.66805	4.38047	0.00726679	4.56608	0.936295	2.15091	41
A135	0.79403	0.522453	0.762836	0.72002		3.66701	4.37735	0.0072616	4.55833	0.935626	2.14778	50
A136	0.751045	0.503073	0.767726	0.742717		3.66586	4.37694	0.00726093	4.5602	0.935539	2.14839	48
A137	0.766567	0.669936	0.827628	0.712229		3.71359	4.45604	0.00739215	4.69523	0.952447	2.20596	7
A138	0.745672	0.604113	0.596577	0.708503		3.6181	4.28822	0.00711375	4.3924	0.916576	2.07798	112
A139	0.770746	0.573387	0.718826	0.703252		3.65386	4.35074	0.00721747	4.5047	0.92994	2.12548	87
A140	0.761791	0.546088	0.753056	0.713584		3.66075	4.36452	0.00724033	4.53227	0.932885	2.13696	72
					Min Pi	1.72227	602.807
					Max Pi	3.8295

## Sheet: 19_09
2019/09	C1	C2	C3	C4
A1	5.05	2.07	1.34	2.8
A2	0.21	2.55	0.13	0.001
A3	0.32	7.41	0.11	0.8
A4	0.06	-10.31	0.5	0.69
A5	0.42	2.73	0.05	0.01
A6	0.35	5.12	-0.01	0.06
A7	1.91	1.46	1.04	1.55
A8	0.55	6.51	0.03	-0.05
A9	0.48	7.58	-0.18	-0.33
A10	-0.02	-14.79	0.74	2.68
A11	0.28	2.83	-0.02	0.13
A12	0.42	5.43	0.1	0.69
A13	0.29	-0.43	0.37	0.38
A14	0.78	0.6	0.54	1.64
A15	0.1	10.24	-0.08	-0.07
A16	0.75	2.71	0.34	0.16
A17	0.44	12.29	0.27	0.85
A18	0.45	1.5	0.13	0.23
A19	0.62	3.13	0.05	-0.1
A20	3.61	0.11	1.54	-0.14
A21	1.24	8.39	0.34	0.86
A22	0.88	1.66	0.18	0.65
A23	0.44	14.72	0.05	0.4
A24	0.25	6.51	0.16	0.51
A25	-0.07	-6.88	0.09	3.65
A26	0.43	-3.36	0.36	0.27
A27	0.17	-1.14	0.09	0.52
A28	0.13	1.68	0.13	1.09
A29	1.83	-1.22	1.01	1.17
A30	0.21	-2.92	0.27	0.5
A31	1.46	-0.03	4.43	2.35
A32	0.16	-2.41	-0.02	-154.94
A33	0.5	9.17	0.06	0.3
A34	0.36	1.79	0.15	-0.01
A35	0.57	3.74	0.82	1.44
A36	0.95	-0.39	0.12	0.07
A37	0.27	0.01	0.11	0.55
A38	0.36	-3.09	0.17	0.07
A39	-0.52	-2.91	-0.4	-0.71
A40	0.62	0.94	0.22	0.2
A41	0.76	2.29	0.8	1.25
A42	0.42	-10.23	2.78	0.93
A43	0.3	8.43	-0.2	0.12
A44	0.41	5.57	0.23	0.25
A45	0.4	3.01	0.08	0.03
A46	0.36	-0.28	-0.07	0.05
A47	0.24	-8.17	0.3	-0.07
A48	2.18	-1.11	0.74	0.55
A49	0.94	7.26	4.87	0.7
A50	0.67	10.1	0.91	0.48
A51	0.3	-0.94	0.59	0.11
A52	0.69	5.13	-0.27	-0.53
A53	1.05	6.6	0.39	0.17
A54	0.4	4.32	-0.04	-0.17
A55	1.06	0.78	0.74	1.37
A56	0.41	28.06	0.11	0.23
A57	0.1	-4.08	0.33	0.63
A58	0.76	2.15	0.05	0
A59	0.88	3.15	0.28	0.21
A60	1.24	2.77	0.83	1.86
A61	0.73	6.97	0.42	3.42
A62	16.56	7.16	5.25	3.18
A63	3.47	0.42	5.63	9.56
A64	1.22	5.91	1.69	1.01
A65	0.8	6.61	-1.04	-0.34
A66	0.72	4.05	0.08	0.18
A67	0.6	2.61	0.08	0.26
A68	0.22	-10.93	0.35	0.33
A69	0.22	2.98	0.15	0.53
A70	0.86	4.46	1.12	0.52
A71	0.4	-0.16	1.64	0.37
A72	0.21	0.61	-0.04	0.66
A73	1.01	3.84	3.75	2.25
A74	0.09	-7.21	0.12	0.73
A75	3.01	4.26	0.47	1.17
A76	0.89	1.26	0.37	1.28
A77	2.51	2.69	1.17	2.07
A78	2.47	7.18	1.87	1.47
A79	0.3	-11.67	0.71	0.2
A80	0.2	1.29	-0.85	0.01
A81	0.91	2.54	0.09	-0.28
A82	0.25	13.03	0.03	1.42
A83	0.22	0.6	-0.24	-1.92
A84	0.38	6.29	0.56	0.56
A85	0.43	3.63	0.21	0.18
A86	2.3	0.93	1.83	2.07
A87	2.14	1.27	0.45	-0.83
A88	0.1	3.69	0.04	-0.03
A89	0.13	0.9	-0.01	0.31
A90	0.13	0.9	-0.01	0.3
A91	0.13	0.9	-0.01	0.29
A92	0.51	0.91	0.26	0.51
A93	0.42	10.59	0.25	0.34
A94	0.61	0.66	0.07	0.33
A95	0.37	4.07	0.2	0.95
A96	0.89	3.72	0.17	-1.17
A97	0.47	25.96	-0.02	0.36
A98	0.5	-5.69	0.99	-0.02
A99	2.95	0.2	1.01	-14.99
A100	0.55	2.94	0.12	0.24
A101	0.4	0.01	0.24	0.07
A102	0.76	10.15	-0.15	-0.2
A103	1.28	3.57	0.66	0.69
A104	0.85	1.59	1.1	1.24
A105	-0.05	-0.98	-0.18	-0.26
A106	0.41	27.71	-0.45	-0.3
A107	0.18	4.32	-0.3	-0.08
A108	0.5	3.32	0.07	0.4
A109	0.29	-5.52	0.32	0.1
A110	0.42	0.1	0.13	0.37
A111	0.83	1.97	0.24	0.08
A112	3.86	2.13	1.45	9.69
A113	3.32	-1.88	0.18	1.76
A114	0.47	-7.02	0.07	0.38
A115	0.41	4.62	0.3	0.04
A116	0.81	1.85	0.08	0.01
A117	-0.25	14.01	-0.61	-1.08
A118	0.68	4.87	0.45	0.38
A119	0.19	1.01	-0.06	0.18
A120	-0.02	1.74	-0.1	-0.2
A121	0.82	1.87	1.36	0.46
A122	0.06	-3.43	0.19	0.62
A123	0.54	0.66	0.1	-1.25
A124	0.24	2.01	0.24	0.34
A125	0.97	15.61	-0.26	-0.77
A126	0.71	2.8	1.33	0.59
A127	0.65	1.6	1.56	1.4
A128	0.07	0.17	-0.06	-0.19
A129	0.73	4.98	-0.21	-0.11
A130	0.78	3.04	0.77	0.17
A131	0.38	4	0.23	0.38
A132	-0.21	18.75	-0.74	-0.91
A133	0.5	-1.07	0.56	0.12
A134	0.27	6.58	0.02	0.17
A135	0.45	2.3	0.19	0.07
A136	0.13	-0.98	0.14	0.59
A137	0.47	6.05	-0.47	-0.31
A138	0.41	3.42	0.97	0.44
A139	0.77	5.85	0.57	0.18
A140	0.21	-5.24	0.3	0.04
MAX	16.56	28.06	5.63	9.69
MIN	-0.52	-14.79	-1.04	-154.94
	1	1	1	1
	Normalization
	C1	C2	C3	C4
A1	0.326112	0.393466	0.356822	0.958149
A2	0.04274	0.404667	0.175412	0.941147
A3	0.0491803	0.518086	0.172414	0.946
A4	0.0339578	0.104551	0.230885	0.945332
A5	0.0550351	0.408868	0.163418	0.941201
A6	0.0509368	0.464644	0.154423	0.941505
A7	0.142272	0.37923	0.311844	0.950556
A8	0.0626464	0.497083	0.16042	0.940837
A9	0.058548	0.522054	0.128936	0.939136
A10	0.029274	0	0.266867	0.95742
A11	0.0468384	0.411202	0.152924	0.94193
A12	0.0550351	0.471879	0.170915	0.945332
A13	0.0474239	0.335123	0.211394	0.943449
A14	0.0761124	0.35916	0.236882	0.951102
A15	0.0362998	0.584131	0.143928	0.940716
A16	0.074356	0.408401	0.206897	0.942113
A17	0.0562061	0.631972	0.196402	0.946304
A18	0.0567916	0.380163	0.175412	0.942538
A19	0.0667447	0.418203	0.163418	0.940533
A20	0.241803	0.347725	0.386807	0.94029
A21	0.103044	0.540957	0.206897	0.946365
A22	0.0819672	0.383897	0.182909	0.945089
A23	0.0562061	0.688681	0.163418	0.94357
A24	0.045082	0.497083	0.17991	0.944239
A25	0.0263466	0.184597	0.169415	0.963312
A26	0.0556206	0.266744	0.209895	0.942781
A27	0.0403981	0.318553	0.169415	0.944299
A28	0.0380562	0.384364	0.175412	0.947762
A29	0.137588	0.316686	0.307346	0.948248
A30	0.04274	0.277013	0.196402	0.944178
A31	0.115925	0.344457	0.82009	0.955415
A32	0.0398126	0.288915	0.152924	0
A33	0.059719	0.55916	0.164918	0.942963
A34	0.0515222	0.386931	0.178411	0.94108
A35	0.0638173	0.432439	0.278861	0.949888
A36	0.0860656	0.336056	0.173913	0.941566
A37	0.0462529	0.345391	0.172414	0.944482
A38	0.0515222	0.273046	0.181409	0.941566
A39	0	0.277246	0.095952	0.936828
A40	0.0667447	0.367095	0.188906	0.942356
A41	0.0749415	0.3986	0.275862	0.948734
A42	0.0550351	0.106418	0.572714	0.94679
A43	0.0480094	0.54189	0.125937	0.94187
A44	0.0544496	0.475146	0.190405	0.942659
A45	0.0538642	0.415403	0.167916	0.941323
A46	0.0515222	0.338623	0.145427	0.941444
A47	0.0444965	0.154492	0.2009	0.940716
A48	0.15808	0.319253	0.266867	0.944482
A49	0.0854801	0.514586	0.886057	0.945393
A50	0.0696721	0.580863	0.292354	0.944056
A51	0.0480094	0.323221	0.244378	0.941809
A52	0.0708431	0.464877	0.115442	0.937921
A53	0.0919204	0.499183	0.214393	0.942173
A54	0.0538642	0.445974	0.149925	0.940108
A55	0.0925059	0.363361	0.266867	0.949462
A56	0.0544496	1	0.172414	0.942538
A57	0.0362998	0.249942	0.205397	0.944968
A58	0.0749415	0.395333	0.163418	0.941141
A59	0.0819672	0.41867	0.197901	0.942416
A60	0.103044	0.409802	0.28036	0.952439
A61	0.073185	0.507818	0.218891	0.961915
A62	1	0.512252	0.943028	0.960457
A63	0.233607	0.354959	1	0.99921
A64	0.101874	0.483081	0.409295	0.947276
A65	0.0772834	0.499417	0	0.939076
A66	0.0725995	0.439673	0.167916	0.942234
A67	0.0655738	0.406068	0.167916	0.94272
A68	0.0433255	0.0900817	0.208396	0.943145
A69	0.0433255	0.414702	0.178411	0.94436
A70	0.0807963	0.449242	0.323838	0.944299
A71	0.0538642	0.341424	0.401799	0.943388
A72	0.04274	0.359393	0.149925	0.94515
A73	0.0895785	0.434772	0.718141	0.954808
A74	0.0357143	0.176896	0.173913	0.945575
A75	0.206674	0.444574	0.226387	0.948248
A76	0.0825527	0.374562	0.211394	0.948916
A77	0.1774	0.407935	0.331334	0.953714
A78	0.175059	0.512719	0.436282	0.95007
A79	0.0480094	0.0728121	0.262369	0.942356
A80	0.0421546	0.375263	0.0284858	0.941201
A81	0.0837237	0.404434	0.169415	0.93944
A82	0.045082	0.649242	0.16042	0.949766
A83	0.0433255	0.35916	0.11994	0.929478
A84	0.0526932	0.491949	0.23988	0.944542
A85	0.0556206	0.429872	0.187406	0.942234
A86	0.165105	0.366861	0.430285	0.953714
A87	0.155738	0.374796	0.223388	0.936099
A88	0.0362998	0.431272	0.161919	0.940959
A89	0.0380562	0.366161	0.154423	0.943024
A90	0.0380562	0.366161	0.154423	0.942963
A91	0.0380562	0.366161	0.154423	0.942902
A92	0.0603044	0.366394	0.194903	0.944239
A93	0.0550351	0.592299	0.193403	0.943206
A94	0.0661593	0.36056	0.166417	0.943145
A95	0.0521077	0.44014	0.185907	0.946911
A96	0.0825527	0.431972	0.181409	0.934034
A97	0.0579625	0.950992	0.152924	0.943327
A98	0.059719	0.212369	0.304348	0.941019
A99	0.203162	0.349825	0.307346	0.850088
A100	0.0626464	0.413769	0.173913	0.942599
A101	0.0538642	0.345391	0.191904	0.941566
A102	0.0749415	0.58203	0.133433	0.939926
A103	0.105386	0.428471	0.254873	0.945332
A104	0.0802108	0.382264	0.32084	0.948673
A105	0.0275176	0.322287	0.128936	0.939561
A106	0.0544496	0.991832	0.0884558	0.939318
A107	0.0409836	0.445974	0.110945	0.940655
A108	0.059719	0.422637	0.166417	0.94357
A109	0.0474239	0.216336	0.203898	0.941748
A110	0.0550351	0.347491	0.175412	0.943388
A111	0.0790398	0.391132	0.191904	0.941627
A112	0.25644	0.394866	0.373313	1
A113	0.224824	0.301284	0.182909	0.951831
A114	0.0579625	0.18133	0.166417	0.943449
A115	0.0544496	0.452975	0.2009	0.941384
A116	0.0778689	0.388331	0.167916	0.941201
A117	0.015808	0.672112	0.0644678	0.934581
A118	0.0702576	0.45881	0.223388	0.943449
A119	0.0415691	0.368728	0.146927	0.942234
A120	0.029274	0.385764	0.14093	0.939926
A121	0.0784543	0.388798	0.35982	0.943935
A122	0.0339578	0.265111	0.184408	0.944907
A123	0.0620609	0.36056	0.170915	0.933548
A124	0.0444965	0.392065	0.191904	0.943206
A125	0.0872365	0.709452	0.116942	0.936464
A126	0.0720141	0.410502	0.355322	0.944725
A127	0.0685012	0.382497	0.389805	0.949645
A128	0.0345433	0.349125	0.146927	0.939987
A129	0.073185	0.461377	0.124438	0.940473
A130	0.0761124	0.416103	0.271364	0.942173
A131	0.0526932	0.438506	0.190405	0.943449
A132	0.0181499	0.78273	0.0449775	0.935613
A133	0.059719	0.320187	0.23988	0.94187
A134	0.0462529	0.498716	0.158921	0.942173
A135	0.0567916	0.398833	0.184408	0.941566
A136	0.0380562	0.322287	0.176912	0.944725
A137	0.0579625	0.486348	0.0854573	0.939258
A138	0.0544496	0.424971	0.301349	0.943813
A139	0.0755269	0.48168	0.241379	0.942234
A140	0.04274	0.22287	0.2009	0.941384
	0.163265	0.163265	0.244898	0.428571
	Weighted normalized matrix
	C1	C2	C3	C4		Si	λ
A1	0.0532427	0.0642392	0.0873849	0.410635		0.615501	0.5
A2	0.00697795	0.066068	0.0429581	0.403348		0.519352
A3	0.00802943	0.0845854	0.0422238	0.405428		0.540267
A4	0.00554413	0.0170695	0.0565432	0.405142		0.484299
A5	0.00898531	0.0667539	0.0400208	0.403372		0.519132
A6	0.00831619	0.0758601	0.0378178	0.403502		0.525496
A7	0.023228	0.061915	0.07637	0.407381		0.568894
A8	0.010228	0.0811562	0.0392865	0.403215		0.533886
A9	0.00955884	0.0852331	0.0315761	0.402487		0.528855
A10	0.00477942	0	0.0653551	0.410322		0.480457
A11	0.00764707	0.0671349	0.0374507	0.403684		0.515917
A12	0.00898531	0.0770413	0.0418566	0.405142		0.533025
A13	0.00774266	0.0547138	0.05177	0.404335		0.518561
A14	0.0124265	0.0586382	0.0580118	0.407615		0.536691
A15	0.00592648	0.0953681	0.0352477	0.403163		0.539706
A16	0.0121397	0.0666777	0.0506686	0.403762		0.533248
A17	0.00917649	0.103179	0.0480984	0.405558		0.566012
A18	0.00927208	0.0620674	0.0429581	0.403944		0.518242
A19	0.0108971	0.0682779	0.0400208	0.403085		0.522281
A20	0.039478	0.0567713	0.0947282	0.402981		0.593959
A21	0.0168236	0.0883193	0.0506686	0.405584		0.561396
A22	0.0133824	0.062677	0.0447939	0.405038		0.525891
A23	0.00917649	0.112438	0.0400208	0.404387		0.566022
A24	0.00736031	0.0811562	0.0440596	0.404673		0.537249
A25	0.00430148	0.0301383	0.0414895	0.412847		0.488777
A26	0.0090809	0.04355	0.0514029	0.404049		0.508082
A27	0.0065956	0.0520086	0.0414895	0.404699		0.504793
A28	0.00621325	0.0627532	0.0429581	0.406183		0.518108
A29	0.0224633	0.0517038	0.0752685	0.406391		0.555827
A30	0.00697795	0.0452265	0.0480984	0.404647		0.50495
A31	0.0189265	0.0562378	0.200838	0.409463		0.685466
A32	0.00650001	0.0471697	0.0374507	0		0.0911204
A33	0.00975002	0.0912912	0.040388	0.404127		0.545556
A34	0.00841178	0.0631723	0.0436924	0.40332		0.518596
A35	0.0104191	0.0706021	0.0682924	0.407094		0.556408
A36	0.0140515	0.0548662	0.042591	0.403528		0.515036
A37	0.00755148	0.0563902	0.0422238	0.404777		0.510943
A38	0.00841178	0.0445788	0.0444268	0.403528		0.500945
A39	0	0.0452646	0.0234985	0.401497		0.47026
A40	0.0108971	0.0599337	0.0462626	0.403866		0.52096
A41	0.0122353	0.0650774	0.0675581	0.4066		0.55147
A42	0.00898531	0.0173743	0.140256	0.405767		0.572383
A43	0.00783825	0.0884717	0.0308417	0.403658		0.53081
A44	0.00888972	0.0775747	0.0466298	0.403996		0.537091
A45	0.00879413	0.0678207	0.0411223	0.403424		0.521161
A46	0.00841178	0.0552853	0.0356149	0.403476		0.502788
A47	0.00726472	0.0252232	0.0491999	0.403163		0.484851
A48	0.0258089	0.0521229	0.0653551	0.404777		0.548064
A49	0.0139559	0.0840138	0.216994	0.405168		0.720131
A50	0.011375	0.0948347	0.0715969	0.404595		0.582402
A51	0.00783825	0.0527706	0.0598476	0.403632		0.524088
A52	0.0115662	0.0758982	0.0282716	0.401966		0.517702
A53	0.0150074	0.0814991	0.0525044	0.403788		0.552799
A54	0.00879413	0.072812	0.0367163	0.402903		0.521226
A55	0.015103	0.0593241	0.0653551	0.406912		0.546694
A56	0.00888972	0.163265	0.0422238	0.403944		0.618323
A57	0.00592648	0.0408067	0.0503014	0.404986		0.50202
A58	0.0122353	0.064544	0.0400208	0.403346		0.520146
A59	0.0133824	0.0683541	0.0484656	0.403892		0.534094
A60	0.0168236	0.0669063	0.0686596	0.408188		0.560577
A61	0.0119486	0.0829089	0.0536059	0.412249		0.560712
A62	0.163265	0.0836328	0.230946	0.411624		0.889468
A63	0.0381398	0.0579524	0.244898	0.428233		0.769223
A64	0.0166324	0.0788701	0.100236	0.405975		0.601713
A65	0.0126177	0.0815372	0	0.402461		0.496615
A66	0.011853	0.0717833	0.0411223	0.403814		0.528573
A67	0.0107059	0.0662966	0.0411223	0.404022		0.522147
A68	0.00707354	0.0147072	0.0510357	0.404205		0.477021
A69	0.00707354	0.0677064	0.0436924	0.404725		0.523198
A70	0.0131912	0.0733454	0.0793073	0.404699		0.570543
A71	0.00879413	0.0557425	0.0983998	0.404309		0.567245
A72	0.00697795	0.0586763	0.0367163	0.405064		0.507434
A73	0.014625	0.0709831	0.175871	0.409203		0.670682
A74	0.00583089	0.0288809	0.042591	0.405246		0.482549
A75	0.0337427	0.0725834	0.0554417	0.406391		0.568159
A76	0.013478	0.0611529	0.05177	0.406678		0.533079
A77	0.0289633	0.0666015	0.0811431	0.408734		0.585442
A78	0.0285809	0.083709	0.106845	0.407172		0.626307
A79	0.00783825	0.0118877	0.0642536	0.403866		0.487846
A80	0.00688237	0.0612672	0.0069761	0.403372		0.478497
A81	0.0136691	0.0660299	0.0414895	0.402617		0.523805
A82	0.00736031	0.105998	0.0392865	0.407042		0.559687
A83	0.00707354	0.0586382	0.0293731	0.398347		0.493432
A84	0.00860296	0.080318	0.0587461	0.404803		0.552471
A85	0.0090809	0.070183	0.0458954	0.403814		0.528974
A86	0.0269559	0.0598956	0.105376	0.408734		0.600962
A87	0.0254265	0.061191	0.0547073	0.401185		0.54251
A88	0.00592648	0.0704116	0.0396536	0.403268		0.519259
A89	0.00621325	0.0597813	0.0378178	0.404153		0.507965
A90	0.00621325	0.0597813	0.0378178	0.404127		0.507939
A91	0.00621325	0.0597813	0.0378178	0.404101		0.507913
A92	0.00984561	0.0598194	0.0477312	0.404673		0.52207
A93	0.00898531	0.0967016	0.0473641	0.404231		0.557282
A94	0.0108015	0.0588668	0.0407551	0.404205		0.514628
A95	0.00850737	0.0718595	0.0455283	0.405819		0.531714
A96	0.013478	0.0705259	0.0444268	0.4003		0.52873
A97	0.00946325	0.155264	0.0374507	0.404283		0.60646
A98	0.00975002	0.0346724	0.0745342	0.403294		0.52225
A99	0.0331692	0.0571142	0.0752685	0.364323		0.529875
A100	0.010228	0.067554	0.042591	0.40397		0.524343
A101	0.00879413	0.0563902	0.0469969	0.403528		0.515709
A102	0.0122353	0.0950252	0.0326775	0.402825		0.542763
A103	0.0172059	0.0699544	0.0624178	0.405142		0.55472
A104	0.0130956	0.0624103	0.078573	0.406574		0.560653
A105	0.00449266	0.0526182	0.0315761	0.402669		0.491356
A106	0.00888972	0.161931	0.0216626	0.402565		0.595048
A107	0.00669119	0.072812	0.0271701	0.403137		0.509811
A108	0.00975002	0.0690018	0.0407551	0.404387		0.523894
A109	0.00774266	0.0353201	0.0499342	0.403606		0.496603
A110	0.00898531	0.0567332	0.0429581	0.404309		0.512985
A111	0.0129044	0.0638581	0.0469969	0.403554		0.527313
A112	0.0418677	0.0644678	0.0914237	0.428571		0.62633
A113	0.0367059	0.0491891	0.0447939	0.407927		0.538616
A114	0.00946325	0.0296049	0.0407551	0.404335		0.484158
A115	0.00888972	0.073955	0.0491999	0.40345		0.535494
A116	0.0127133	0.0634009	0.0411223	0.403372		0.520608
A117	0.00258089	0.109732	0.015788	0.400534		0.528635
A118	0.0114706	0.0749076	0.0547073	0.404335		0.54542
A119	0.00678678	0.0602004	0.035982	0.403814		0.506783
A120	0.00477942	0.0629818	0.0345134	0.402825		0.5051
A121	0.0128088	0.0634771	0.0881192	0.404543		0.568948
A122	0.00554413	0.0432833	0.0451611	0.40496		0.498948
A123	0.0101324	0.0588668	0.0418566	0.400092		0.510947
A124	0.00726472	0.0640105	0.0469969	0.404231		0.522503
A125	0.0142427	0.115829	0.0286387	0.401341		0.560051
A126	0.0117574	0.0670206	0.0870177	0.404882		0.570677
A127	0.0111838	0.0624484	0.0954625	0.40699		0.576085
A128	0.00563972	0.0569999	0.035982	0.402851		0.501473
A129	0.0119486	0.0753267	0.0304746	0.403059		0.520809
A130	0.0124265	0.067935	0.0664566	0.403788		0.550606
A131	0.00860296	0.0715928	0.0466298	0.404335		0.53116
A132	0.00296324	0.127792	0.0110149	0.400977		0.542747
A133	0.00975002	0.0522753	0.0587461	0.403658		0.524429
A134	0.00755148	0.0814229	0.0389193	0.403788		0.531682
A135	0.00927208	0.0651155	0.0451611	0.403528		0.523077
A136	0.00621325	0.0526182	0.0433253	0.404882		0.507038
A137	0.00946325	0.0794036	0.0209283	0.402539		0.512334
A138	0.00888972	0.0693829	0.0737998	0.404491		0.556563
A139	0.0123309	0.0786415	0.0591133	0.403814		0.5539
A140	0.00697795	0.0363869	0.0491999	0.40345		0.496015
					Min Si	0.0911204
	Normalized matrix				Max Si	0.889468
	C1	C2	C3	C4		Pi	Si+Pi	kia	kib	kic	ki	rank
A1	0.326112	0.393466	0.356822	0.958149		3.45036	4.06586	0.00791231	8.44728	0.855142	3.48864	8
A2	0.04274	0.404667	0.175412	0.941147		3.08764	3.60699	0.00701933	7.21417	0.758631	2.99736	96
A3	0.0491803	0.518086	0.172414	0.946		3.1364	3.67667	0.00715493	7.46761	0.773286	3.09506	52
A4	0.0339578	0.104551	0.230885	0.945332		2.94188	3.42618	0.00666747	6.75798	0.720603	2.81411	133
A5	0.0550351	0.408868	0.163418	0.941201		3.10308	3.62221	0.00704895	7.21932	0.761832	3.00118	92
A6	0.0509368	0.464644	0.154423	0.941505		3.10479	3.63028	0.00706466	7.29	0.76353	3.02692	77
A7	0.142272	0.37923	0.311844	0.950556		3.31116	3.88006	0.00755073	7.8675	0.816064	3.26167	19
A8	0.0626464	0.497083	0.16042	0.940837		3.14133	3.67522	0.0071521	7.40001	0.772981	3.07128	60
A9	0.058548	0.522054	0.128936	0.939136		3.10747	3.63633	0.00707642	7.32818	0.764802	3.04104	71
A10	0.029274	0	0.266867	0.95742		2.26699	2.74745	0.00534663	6.38477	0.57785	2.59285	138
A11	0.0468384	0.411202	0.152924	0.94193		3.07767	3.59359	0.00699325	7.17158	0.755813	2.98071	104
A12	0.0550351	0.471879	0.170915	0.945332		3.13245	3.66548	0.00713315	7.3862	0.770933	3.06517	61
A13	0.0474239	0.335123	0.211394	0.943449		3.10326	3.62183	0.0070482	7.21315	0.761752	2.99898	94
A14	0.0761124	0.35916	0.236882	0.951102		3.1843	3.72099	0.00724118	7.45187	0.782608	3.09548	51
A15	0.0362998	0.584131	0.143928	0.940716		3.09412	3.63382	0.00707155	7.44072	0.764275	3.07996	57
A16	0.074356	0.408401	0.206897	0.942113		3.17285	3.70609	0.00721219	7.40846	0.779476	3.07835	59
A17	0.0562061	0.631972	0.196402	0.946304		3.20071	3.76672	0.00733017	7.7817	0.792226	3.21661	25
A18	0.0567916	0.380163	0.175412	0.942538		3.10789	3.62613	0.00705658	7.21192	0.762658	2.99912	93
A19	0.0667447	0.418203	0.163418	0.940533		3.1259	3.64818	0.00709949	7.26508	0.767295	3.02061	81
A20	0.241803	0.347725	0.386807	0.94029		3.40113	3.99509	0.00777459	8.18671	0.840258	3.38834	12
A21	0.103044	0.540957	0.206897	0.946365		3.2511	3.8125	0.00741926	7.75576	0.801854	3.21368	27
A22	0.0819672	0.383897	0.182909	0.945089		3.15576	3.68165	0.00716463	7.31934	0.774335	3.044	69
A23	0.0562061	0.688681	0.163418	0.94357		3.18305	3.74907	0.00729583	7.77315	0.788515	3.21126	28
A24	0.045082	0.497083	0.17991	0.944239		3.12776	3.66501	0.00713224	7.43026	0.770834	3.08048	55
A25	0.0263466	0.184597	0.169415	0.963312		2.94272	3.43149	0.00667781	6.80753	0.72172	2.83211	131
A26	0.0556206	0.266744	0.209895	0.942781		3.08721	3.5953	0.00699658	7.09028	0.756172	2.95257	109
A27	0.0403981	0.318553	0.169415	0.944299		3.04497	3.54976	0.00690797	7.03346	0.746595	2.92668	118
A28	0.0380562	0.384364	0.175412	0.947762		3.07213	3.59023	0.00698672	7.1929	0.755107	2.98771	100
A29	0.137588	0.316686	0.307346	0.948248		3.27876	3.83459	0.00746224	7.70821	0.8065	3.20004	31
A30	0.04274	0.277013	0.196402	0.944178		3.05554	3.56049	0.00692885	7.04037	0.748852	2.93052	117
A31	0.115925	0.344457	0.82009	0.955415		3.47694	4.16241	0.00810019	9.22814	0.875448	3.77354	4
A32	0.0398126	0.288915	0.152924	0		2.03866	2.12978	0.00414464	2	0.447942	0.972213	140
A33	0.059719	0.55916	0.164918	0.942963		3.15897	3.70452	0.00720914	7.53673	0.779145	3.12288	47
A34	0.0515222	0.386931	0.178411	0.94108		3.10255	3.62115	0.00704688	7.21318	0.761609	2.9989	95
A35	0.0638173	0.432439	0.278861	0.949888		3.21983	3.77624	0.00734869	7.68568	0.794228	3.1844	34
A36	0.0860656	0.336056	0.173913	0.941566		3.13303	3.64807	0.00709928	7.18907	0.767272	2.99406	97
A37	0.0462529	0.345391	0.172414	0.944482		3.0721	3.58304	0.00697273	7.11426	0.753595	2.95931	107
A38	0.0515222	0.273046	0.181409	0.941566		3.05807	3.55901	0.00692596	6.99765	0.74854	2.91542	121
A39	0	0.277246	0.095952	0.936828		2.34671	2.81697	0.00548193	6.31197	0.592473	2.577	139
A40	0.0667447	0.367095	0.188906	0.942356		3.13163	3.65259	0.00710807	7.25339	0.768222	3.01711	85
A41	0.0749415	0.3986	0.275862	0.948734		3.22282	3.77429	0.00734491	7.63296	0.793819	3.16575	41
A42	0.0550351	0.106418	0.572714	0.94679		3.16576	3.73815	0.00727457	7.83447	0.786217	3.23117	24
A43	0.0480094	0.54189	0.125937	0.94187		3.09064	3.62145	0.00704747	7.34138	0.761673	3.04367	70
A44	0.0544496	0.475146	0.190405	0.942659		3.14857	3.68566	0.00717242	7.43873	0.775177	3.08618	53
A45	0.0538642	0.415403	0.167916	0.941323		3.10747	3.62863	0.00706144	7.24374	0.763183	3.01056	89
A46	0.0515222	0.338623	0.145427	0.941444		3.05225	3.55504	0.00691824	7.01502	0.747705	2.92095	119
A47	0.0444965	0.154492	0.2009	0.940716		2.98794	3.4728	0.00675819	6.78664	0.730408	2.8303	132
A48	0.15808	0.319253	0.266867	0.944482		3.26931	3.81737	0.00742874	7.61838	0.802879	3.1664	40
A49	0.0854801	0.514586	0.886057	0.945393		3.51352	4.23365	0.00823883	9.62652	0.890432	3.92174	3
A50	0.0696721	0.580863	0.292354	0.944056		3.27802	3.86042	0.00751251	7.99949	0.811933	3.30506	16
A51	0.0480094	0.323221	0.244378	0.941809		3.12354	3.64762	0.00709841	7.28375	0.767178	3.02705	76
A52	0.0708431	0.464877	0.115442	0.937921		3.09378	3.61148	0.00702807	7.19907	0.759576	2.99269	98
A53	0.0919204	0.499183	0.214393	0.942173		3.23065	3.78345	0.00736274	7.65138	0.795746	3.1734	39
A54	0.0538642	0.445974	0.149925	0.940108		3.09935	3.62058	0.00704577	7.24047	0.761489	3.00835	91
A55	0.0925059	0.363361	0.266867	0.949462		3.22725	3.77394	0.00734423	7.58271	0.793746	3.14818	44
A56	0.0544496	1	0.172414	0.942538		3.24692	3.86524	0.0075219	8.37845	0.812947	3.43771	9
A57	0.0362998	0.249942	0.205397	0.944968		3.03407	3.53609	0.00688135	6.99768	0.743719	2.91238	122
A58	0.0749415	0.395333	0.163418	0.941141		3.13051	3.65066	0.00710431	7.24391	0.767816	3.01355	88
A59	0.0819672	0.41867	0.197901	0.942416		3.17962	3.71372	0.00722703	7.42108	0.781079	3.08376	54
A60	0.103044	0.409802	0.28036	0.952439		3.26621	3.82679	0.00744707	7.75418	0.804861	3.21504	26
A61	0.073185	0.507818	0.218891	0.961915		3.22062	3.78133	0.0073586	7.7333	0.795299	3.20169	30
A62	1	0.512252	0.943028	0.960457		3.86513	4.7546	0.00925262	11.6574	1	4.69822	1
A63	0.233607	0.354959	1	0.99921		3.63275	4.40198	0.00856641	10.2238	0.925835	4.15221	2
A64	0.101874	0.483081	0.409295	0.947276		3.35729	3.959	0.00770436	8.25031	0.832668	3.40568	11
A65	0.0772834	0.499417	0	0.939076		2.52461	3.02123	0.00587942	6.68847	0.635432	2.73562	137
A66	0.0725995	0.439673	0.167916	0.942234		3.14694	3.67551	0.00715268	7.34445	0.773043	3.05194	66
A67	0.0655738	0.406068	0.167916	0.94272		3.12514	3.64728	0.00709774	7.26324	0.767106	3.01984	83
A68	0.0433255	0.0900817	0.208396	0.943145		2.93034	3.40737	0.00663086	6.67245	0.716646	2.78175	135
A69	0.0433255	0.414702	0.178411	0.94436		3.09656	3.61976	0.00704418	7.26075	0.761317	3.01531	86
A70	0.0807963	0.449242	0.323838	0.944299		3.27514	3.84568	0.00748384	7.86794	0.808834	3.25723	20
A71	0.0538642	0.341424	0.401799	0.943388		3.23497	3.80221	0.00739924	7.81204	0.799691	3.23193	23
A72	0.04274	0.359393	0.149925	0.94515		3.04823	3.55567	0.00691945	7.06405	0.747837	2.93814	114
A73	0.0895785	0.434772	0.718141	0.954808		3.44977	4.12045	0.00801854	9.05257	0.866624	3.70678	5
A74	0.0357143	0.176896	0.173913	0.945575		2.96194	3.44449	0.00670309	6.74861	0.724453	2.81327	134
A75	0.206674	0.444574	0.226387	0.948248		3.3216	3.88976	0.00756962	7.86456	0.818105	3.26194	18
A76	0.0825527	0.374562	0.211394	0.948916		3.1786	3.71168	0.00722306	7.40943	0.78065	3.07943	58
A77	0.1774	0.407935	0.331334	0.953714		3.36071	3.94615	0.00767936	8.07342	0.829965	3.3423	14
A78	0.175059	0.512719	0.436282	0.95007		3.44351	4.06982	0.00792001	8.5625	0.855974	3.52933	7
A79	0.0480094	0.0728121	0.262369	0.942356		2.95658	3.44443	0.00670298	6.80412	0.724441	2.83264	130
A80	0.0421546	0.375263	0.0284858	0.941201		2.84117	3.31967	0.00646019	6.64491	0.698201	2.76048	136
A81	0.0837237	0.404434	0.169415	0.93944		3.15061	3.67441	0.00715054	7.29393	0.772812	3.03416	73
A82	0.045082	0.649242	0.16042	0.949766		3.15177	3.71146	0.00722263	7.68828	0.780603	3.17665	37
A83	0.0433255	0.35916	0.11994	0.929478		3.00909	3.50252	0.00681603	6.89118	0.736659	2.87074	127
A84	0.0526932	0.491949	0.23988	0.944542		3.18989	3.74236	0.00728277	7.62778	0.787103	3.15969	43
A85	0.0556206	0.429872	0.187406	0.942234		3.1336	3.66257	0.0071275	7.3423	0.770321	3.04947	68
A86	0.165105	0.366861	0.430285	0.953714		3.38751	3.98847	0.00776171	8.25688	0.838865	3.41192	10
A87	0.155738	0.374796	0.223388	0.936099		3.25497	3.79748	0.00739003	7.55039	0.798695	3.14003	45
A88	0.0362998	0.431272	0.161919	0.940959		3.06817	3.58743	0.00698126	7.2036	0.754517	2.99107	99
A89	0.0380562	0.366161	0.154423	0.943024		3.04322	3.55118	0.00691073	7.06741	0.746894	2.93872	111
A90	0.0380562	0.366161	0.154423	0.942963		3.04319	3.55113	0.00691062	7.06711	0.746882	2.93861	112
A91	0.0380562	0.366161	0.154423	0.942902		3.04316	3.55107	0.00691052	7.06681	0.746871	2.9385	113
A92	0.0603044	0.366394	0.194903	0.944239		3.12675	3.64882	0.00710073	7.26317	0.767429	3.02003	82
A93	0.0550351	0.592299	0.193403	0.943206		3.1849	3.74218	0.00728241	7.67813	0.787065	3.17722	36
A94	0.0661593	0.36056	0.166417	0.943145		3.10825	3.62288	0.00705025	7.17243	0.761973	2.98491	103
A95	0.0521077	0.44014	0.185907	0.946911		3.13112	3.66283	0.007128	7.37116	0.770376	3.05957	62
A96	0.0825527	0.431972	0.181409	0.934034		3.16693	3.69566	0.00719189	7.35599	0.777281	3.05865	63
A97	0.0579625	0.950992	0.152924	0.943327		3.22665	3.83311	0.00745937	8.23833	0.80619	3.3846	13
A98	0.059719	0.212369	0.304348	0.941019		3.12927	3.65152	0.00710599	7.26639	0.767997	3.02151	80
A99	0.203162	0.349825	0.307346	0.850088		3.29514	3.82501	0.00744362	7.43143	0.804487	3.10216	50
A100	0.0626464	0.413769	0.173913	0.942599		3.12855	3.65289	0.00710866	7.28901	0.768286	3.02958	75
A101	0.0538642	0.345391	0.191904	0.941566		3.10333	3.61904	0.00704278	7.18189	0.761166	2.9877	101
A102	0.0749415	0.58203	0.133433	0.939926		3.15492	3.69768	0.00719582	7.50409	0.777706	3.11059	49
A103	0.105386	0.428471	0.254873	0.945332		3.25502	3.80974	0.0074139	7.68442	0.801275	3.18843	32
A104	0.0802108	0.382264	0.32084	0.948673		3.25173	3.81238	0.00741904	7.74791	0.801831	3.21093	29
A105	0.0275176	0.322287	0.128936	0.939561		2.96659	3.45795	0.00672929	6.84754	0.727284	2.84959	128
A106	0.0544496	0.991832	0.0884558	0.939318		3.14611	3.74116	0.00728043	8.07358	0.78685	3.31486	15
A107	0.0409836	0.445974	0.110945	0.940655		3.02784	3.53765	0.0068844	7.08012	0.744048	2.94136	110
A108	0.059719	0.422637	0.166417	0.94357		3.12004	3.64393	0.00709122	7.2799	0.766401	3.02521	78
A109	0.0474239	0.216336	0.203898	0.941748		3.0388	3.53541	0.00688003	6.94055	0.743576	2.89235	125
A110	0.0550351	0.347491	0.175412	0.943388		3.09263	3.60561	0.00701665	7.14674	0.758342	2.97365	105
A111	0.0790398	0.391132	0.191904	0.941627		3.16071	3.68802	0.00717702	7.33738	0.775674	3.05114	67
A112	0.25644	0.394866	0.373313	1		3.44561	4.07194	0.00792414	8.56379	0.856421	3.53006	6
A113	0.224824	0.301284	0.182909	0.951831		3.2446	3.78322	0.00736228	7.50257	0.795696	3.12145	48
A114	0.0579625	0.18133	0.166417	0.943449		3.00481	3.48896	0.00678965	6.7873	0.733808	2.83268	129
A115	0.0544496	0.452975	0.2009	0.941384		3.14993	3.68543	0.00717197	7.42188	0.775128	3.08027	56
A116	0.0778689	0.388331	0.167916	0.941201		3.13643	3.65704	0.00711673	7.25188	0.769158	3.01718	84
A117	0.015808	0.672112	0.0644678	0.934581		2.92769	3.45632	0.00672613	7.23759	0.726942	2.9854	102
A118	0.0702576	0.45881	0.223388	0.943449		3.19688	3.7423	0.00728264	7.55384	0.787089	3.13389	46
A119	0.0415691	0.368728	0.146927	0.942234		3.04468	3.55147	0.00691128	7.05516	0.746954	2.93449	116
A120	0.029274	0.385764	0.14093	0.939926		3.01049	3.51559	0.00684147	7.01991	0.739409	2.91741	120
A121	0.0784543	0.388798	0.35982	0.943935		3.27117	3.84012	0.00747301	7.84849	0.807664	3.2497	22
A122	0.0339578	0.265111	0.184408	0.944907		3.01776	3.51671	0.00684365	6.95597	0.739644	2.89525	124
A123	0.0620609	0.36056	0.170915	0.933548		3.10154	3.61249	0.00703003	7.12875	0.759788	2.96828	106
A124	0.0444965	0.392065	0.191904	0.943206		3.10258	3.62508	0.00705453	7.25607	0.762436	3.01439	87
A125	0.0872365	0.709452	0.116942	0.936464		3.18049	3.74054	0.00727922	7.70636	0.78672	3.18684	33
A126	0.0720141	0.410502	0.355322	0.944725		3.2676	3.83828	0.00746942	7.86571	0.807276	3.25546	21
A127	0.0685012	0.382497	0.389805	0.949645		3.27237	3.84845	0.00748923	7.92739	0.809417	3.27833	17
A128	0.0345433	0.349125	0.146927	0.939987		3.01843	3.5199	0.00684985	6.984	0.740314	2.90545	123
A129	0.073185	0.461377	0.124438	0.940473		3.10821	3.62902	0.0070622	7.24025	0.763265	3.00939	90
A130	0.0761124	0.416103	0.271364	0.942173		3.22471	3.77531	0.0073469	7.6244	0.794034	3.1629	42
A131	0.0526932	0.438506	0.190405	0.943449		3.13407	3.66523	0.00713267	7.36653	0.770881	3.05828	64
A132	0.0181499	0.78273	0.0449775	0.935613		2.92022	3.46297	0.00673906	7.3888	0.72834	3.03896	72
A133	0.059719	0.320187	0.23988	0.94187		3.14117	3.6656	0.00713338	7.29614	0.770958	3.03376	74
A134	0.0462529	0.498716	0.158921	0.942173		3.11019	3.64187	0.00708722	7.36054	0.765968	3.05307	65
A135	0.0567916	0.398833	0.184408	0.941566		3.12222	3.64529	0.00709387	7.272	0.766687	3.02264	79
A136	0.0380562	0.322287	0.176912	0.944725		3.04789	3.55493	0.00691802	7.05953	0.747682	2.93647	115
A137	0.0579625	0.486348	0.0854573	0.939258		3.03813	3.55047	0.00690934	7.11286	0.746743	2.95449	108
A138	0.0544496	0.424971	0.301349	0.943813		3.21237	3.76893	0.00733447	7.68372	0.792691	3.18274	35
A139	0.0755269	0.48168	0.241379	0.942234		3.22432	3.77822	0.00735256	7.66036	0.794646	3.17583	38
A140	0.04274	0.22287	0.2009	0.941384		3.02975	3.52576	0.00686126	6.92965	0.741548	2.88726	126
					Min Pi	2.03866	513.865
					Max Pi	3.86513

## Sheet: 19_12
2019/12	C1	C2	C3	C4
A1	1.11	4.89	0.29	0.19
A2	0.85	-11.56	0.72	0.19
A3	0.15	0.27	-0.03	0.19
A4	0.11	-10.69	1.29	1.36
A5	0.8	1.93	0.56	0.21
A6	0.34	3.06	0.42	0.21
A7	0.93	1.53	0.6	0.4
A8	1.86	7.04	0.36	0.13
A9	2.53	8.94	0.55	0.25
A10	0.41	22.59	-0.84	-2.71
A11	0.26	1.98	0.03	0.04
A12	0.14	2.43	0.24	0.38
A13	0.59	7.28	0.31	0.05
A14	0.33	0.78	0.2	0.39
A15	0.02	2.19	0.2	0.07
A16	0.73	2.63	0.06	0.02
A17	0.06	-1.53	0.68	0.45
A18	0.35	0.68	0.23	0.13
A19	0.38	-5.76	0.03	0.01
A20	2.1	7.22	2.73	0.48
A21	2.03	16.85	0.27	0.42
A22	1.81	3.79	0.24	0.4
A23	0.4	7.99	0.67	0.36
A24	0.23	4.4	1.12	0.49
A25	-0.09	-5.48	0.05	1.53
A26	0.37	0.2	0.38	0.15
A27	0.14	0.61	0.1	0.29
A28	-0.08	-18.89	0.26	0.62
A29	0.45	1.36	0.26	0.18
A30	0.18	4.31	-0.32	-0.23
A31	2.08	2.36	4.57	2.22
A32	0.62	4.31	0.35	185.88
A33	0.27	-0.67	0.15	0.13
A34	0.15	-22.72	1.43	0.11
A35	-0.3	-36.23	0.8	0.43
A36	2.29	2.79	0.52	0.29
A37	0.14	-1.8	0.16	0.43
A38	0.2	1.52	0.46	0.1
A39	0.35	-1.26	0.31	0.54
A40	0.57	-0.66	0.37	0.17
A41	0.27	2	0.26	0.23
A42	0.53	11.65	-0.29	0.14
A43	0.67	2.69	1.05	0.29
A44	0.5	6.62	0.26	0.06
A45	0.63	-6.03	1.63	0.36
A46	0.58	3.77	0.36	0.08
A47	1.21	-3.37	2.69	0.61
A48	-0.11	-0.37	0.44	1.52
A49	0.96	75.43	32.43	1.24
A50	0.47	0.65	1.02	0.28
A51	0.48	-2.64	-0.1	0.01
A52	1.2	4.35	0.37	0.14
A53	-0.78	1.31	0.63	0.11
A54	0.35	4.58	0.41	0.09
A55	0.45	3.97	0.11	0.21
A56	0.78	64.44	-0.17	0.04
A57	0.17	6.61	0.09	0.32
A58	0.79	-0.59	2.17	0.69
A59	-0.22	1.3	0.32	0.14
A60	0.33	0.26	0.21	0.34
A61	1.08	-6.47	0.52	2.96
A62	27.21	8.71	6.69	3.3
A63	-2.19	-28.62	-1.71	-4.74
A64	-0.05	8.66	0.78	0.33
A65	0.77	12.92	0.82	-0.06
A66	0.1	3.96	0.1	0.1
A67	0.93	-1.13	0.48	0.32
A68	0.16	-3.86	0.77	0.41
A69	0.13	2.49	0.24	0.17
A70	1.96	21.05	0.09	0.04
A71	0.29	-18.01	2.58	0.31
A72	0.58	10.04	0.04	0.06
A73	0.78	-6.06	-0.15	0.1
A74	0.51	3.79	0.19	0.43
A75	4.46	3.42	1.3	2
A76	6.36	6.93	1.82	3.36
A77	0.54	0.83	0.26	0.25
A78	1.33	3.12	0.51	0.16
A79	0.4	5.8	0.32	0.02
A80	0.48	-0.64	0.88	0.51
A81	1.2	4.16	0.22	-0.04
A82	0.02	-14.44	0.75	0.58
A83	3.42	1.61	3.44	0.64
A84	0.63	3.01	0.63	0.67
A85	0.36	2.21	1.33	0.33
A86	-1.64	-3.32	0.06	-0.11
A87	1.28	0.68	0.78	0.13
A88	0.11	2.62	-0.04	0.09
A89	0.1	-2.96	0.19	0.32
A90	0.1	-2.96	0.19	0.32
A91	0.09	-2.96	0.17	0.3
A92	0.83	0.36	0.23	0.25
A93	-0.05	-9.76	0.81	0.57
A94	0.47	4.71	0.1	0.14
A95	0.34	1.05	0.27	0.53
A96	-0.16	-2.37	-0.28	-0.56
A97	0.24	-14.46	0.92	0.19
A98	1.48	10.5	1.33	0.24
A99	-5.75	6.59	-6.82	-23.7
A100	1.18	3.45	0.53	0.49
A101	0.23	-12.92	0.95	0.18
A102	0.36	4.82	0.5	0.23
A103	2.39	5.41	0.82	0.51
A104	0.86	0.78	1.49	0.75
A105	0.22	-4.08	-0.02	0.16
A106	-0.07	7.39	-2.33	-0.83
A107	0.14	1.75	0.07	0.05
A108	0.51	1.2	0.07	0.11
A109	0.14	-20.27	0.49	0.06
A110	0.4	1.48	0.11	0.09
A111	0.5	2.72	0.38	0.1
A112	0.76	2.03	-0.25	-6.05
A113	-1.8	-1.52	0.32	2.04
A114	0.09	-124.25	2.39	0.24
A115	0.73	13.06	1.8	0.38
A116	0.64	0.57	0.42	0.04
A117	0	2.47	0.35	0.09
A118	1.08	-12.14	1.83	0.39
A119	0.43	-0.55	0.51	0.35
A120	0.26	10.97	-0.26	-0.34
A121	0.58	-7.28	0.91	0.03
A122	0.04	-13.87	0.75	0.41
A123	0.99	9.88	0.43	0.26
A124	0.78	3.57	0.22	0.08
A125	1.19	8.33	0.59	0.17
A126	0.98	0.15	2.02	0.47
A127	0.54	10	0.67	0.3
A128	0.08	-0.12	-0.1	-0.4
A129	0.64	8.37	0.56	0.09
A130	0.72	8.41	0.57	0.01
A131	0.14	-3.38	0.38	0.4
A132	2.66	3.41	6	1.96
A133	0.27	1.53	-0.35	-0.06
A134	0.13	3.12	0.1	0.42
A135	0.47	1.38	0.27	0.04
A136	0.23	1.41	0.13	0.06
A137	0.63	5.09	0.57	0.1
A138	0.28	4.61	0.18	0.04
A139	0.41	4.15	0.26	-0.04
A140	1.06	4.59	1.59	0.26
MAX	27.21	75.43	32.43	185.88
MIN	-5.75	-124.25	-6.82	-23.7
	1	1	1	1
	Normalization
	C1	C2	C3	C4
A1	0.208131	0.646735	0.181146	0.11399
A2	0.200243	0.564353	0.192102	0.11399
A3	0.179005	0.623598	0.172994	0.11399
A4	0.177791	0.56871	0.206624	0.119572
A5	0.198726	0.631911	0.188025	0.114085
A6	0.184769	0.63757	0.184459	0.114085
A7	0.20267	0.629908	0.189045	0.114992
A8	0.230886	0.657502	0.18293	0.113704
A9	0.251214	0.667017	0.187771	0.114276
A10	0.186893	0.735377	0.152357	0.100153
A11	0.182342	0.632161	0.174522	0.113274
A12	0.178701	0.634415	0.179873	0.114896
A13	0.192354	0.658704	0.181656	0.113322
A14	0.184466	0.626152	0.178854	0.114944
A15	0.175061	0.633213	0.178854	0.113417
A16	0.196602	0.635417	0.175287	0.113179
A17	0.176274	0.614583	0.191083	0.11523
A18	0.185073	0.625651	0.179618	0.113704
A19	0.185983	0.593399	0.174522	0.113131
A20	0.238167	0.658403	0.243312	0.115374
A21	0.236044	0.706631	0.180637	0.115087
A22	0.229369	0.641226	0.179873	0.114992
A23	0.18659	0.66226	0.190828	0.114801
A24	0.181432	0.644281	0.202293	0.115421
A25	0.171723	0.594802	0.175032	0.120384
A26	0.18568	0.623247	0.183439	0.113799
A27	0.178701	0.6253	0.176306	0.114467
A28	0.172027	0.527644	0.180382	0.116042
A29	0.188107	0.629056	0.180382	0.113942
A30	0.179915	0.64383	0.165605	0.111986
A31	0.237561	0.634065	0.290191	0.123676
A32	0.193265	0.64383	0.182675	1
A33	0.182646	0.61889	0.17758	0.113704
A34	0.179005	0.508464	0.210191	0.113608
A35	0.165352	0.440805	0.19414	0.115135
A36	0.243932	0.636218	0.187006	0.114467
A37	0.178701	0.613231	0.177834	0.115135
A38	0.180522	0.629858	0.185478	0.11356
A39	0.185073	0.615935	0.181656	0.11566
A40	0.191748	0.61894	0.183185	0.113894
A41	0.182646	0.632262	0.180382	0.114181
A42	0.190534	0.680589	0.166369	0.113751
A43	0.194782	0.635717	0.20051	0.114467
A44	0.189624	0.655399	0.180382	0.11337
A45	0.193568	0.592047	0.215287	0.114801
A46	0.192051	0.641126	0.18293	0.113465
A47	0.211165	0.605369	0.242293	0.115994
A48	0.171117	0.620393	0.184968	0.120336
A49	0.20358	1	1	0.119
A50	0.188714	0.625501	0.199745	0.114419
A51	0.189017	0.609024	0.17121	0.113131
A52	0.210862	0.64403	0.183185	0.113751
A53	0.150789	0.628806	0.189809	0.113608
A54	0.185073	0.645182	0.184204	0.113513
A55	0.188107	0.642127	0.176561	0.114085
A56	0.198119	0.944962	0.169427	0.113274
A57	0.179612	0.655349	0.176051	0.11461
A58	0.198422	0.619291	0.229045	0.116376
A59	0.167779	0.628756	0.181911	0.113751
A60	0.184466	0.623548	0.179108	0.114706
A61	0.207221	0.589844	0.187006	0.127207
A62	1	0.665865	0.344204	0.128829
A63	0.10801	0.478916	0.130191	0.0904666
A64	0.172937	0.665615	0.193631	0.114658
A65	0.197816	0.686949	0.19465	0.112797
A66	0.177488	0.642077	0.176306	0.11356
A67	0.20267	0.616587	0.185987	0.11461
A68	0.179308	0.602915	0.193376	0.11504
A69	0.178398	0.634716	0.179873	0.113894
A70	0.23392	0.727664	0.176051	0.113274
A71	0.183252	0.532051	0.23949	0.114562
A72	0.192051	0.672526	0.174777	0.11337
A73	0.198119	0.591897	0.169936	0.11356
A74	0.189927	0.641226	0.178599	0.115135
A75	0.309769	0.639373	0.206879	0.122626
A76	0.367415	0.656951	0.220127	0.129115
A77	0.190837	0.626402	0.180382	0.114276
A78	0.214806	0.637871	0.186752	0.113847
A79	0.18659	0.651292	0.181911	0.113179
A80	0.189017	0.61904	0.196178	0.115517
A81	0.210862	0.643079	0.179363	0.112892
A82	0.175061	0.54993	0.192866	0.115851
A83	0.278216	0.630308	0.261401	0.116137
A84	0.193568	0.63732	0.189809	0.11628
A85	0.185376	0.633313	0.207643	0.114658
A86	0.124697	0.605619	0.175287	0.112558
A87	0.213289	0.625651	0.193631	0.113704
A88	0.177791	0.635367	0.172739	0.113513
A89	0.177488	0.607422	0.178599	0.11461
A90	0.177488	0.607422	0.178599	0.11461
A91	0.177184	0.607422	0.178089	0.114515
A92	0.199636	0.624048	0.179618	0.114276
A93	0.172937	0.573367	0.194395	0.115803
A94	0.188714	0.645833	0.176306	0.113751
A95	0.184769	0.627504	0.180637	0.115612
A96	0.1696	0.610377	0.166624	0.110411
A97	0.181735	0.54983	0.197197	0.11399
A98	0.219357	0.67483	0.207643	0.114228
A99	0	0.655248	0	0
A100	0.210255	0.639523	0.187261	0.115421
A101	0.181432	0.557542	0.197962	0.113942
A102	0.185376	0.646384	0.186497	0.114181
A103	0.246966	0.649339	0.19465	0.115517
A104	0.200546	0.626152	0.21172	0.116662
A105	0.181129	0.601813	0.173248	0.113847
A106	0.17233	0.659255	0.114395	0.109123
A107	0.178701	0.63101	0.175541	0.113322
A108	0.189927	0.628255	0.175541	0.113608
A109	0.178701	0.520733	0.186242	0.11337
A110	0.18659	0.629657	0.176561	0.113513
A111	0.189624	0.635867	0.183439	0.11356
A112	0.197512	0.632412	0.167389	0.0842161
A113	0.119842	0.614633	0.181911	0.122817
A114	0.177184	0	0.23465	0.114228
A115	0.196602	0.68765	0.219618	0.114896
A116	0.193871	0.6251	0.184459	0.113274
A117	0.174454	0.634615	0.182675	0.113513
A118	0.207221	0.561448	0.220382	0.114944
A119	0.1875	0.619491	0.186752	0.114753
A120	0.182342	0.677183	0.167134	0.111461
A121	0.192051	0.585787	0.196943	0.113226
A122	0.175667	0.552784	0.192866	0.11504
A123	0.20449	0.671725	0.184713	0.114324
A124	0.198119	0.640124	0.179363	0.113465
A125	0.210558	0.663962	0.18879	0.113894
A126	0.204187	0.622997	0.225223	0.115326
A127	0.190837	0.672326	0.190828	0.114515
A128	0.176881	0.621645	0.17121	0.111175
A129	0.193871	0.664163	0.188025	0.113513
A130	0.196299	0.664363	0.18828	0.113131
A131	0.178701	0.605319	0.183439	0.114992
A132	0.255158	0.639323	0.326624	0.122435
A133	0.182646	0.629908	0.164841	0.112797
A134	0.178398	0.637871	0.176306	0.115087
A135	0.188714	0.629157	0.180637	0.113274
A136	0.181432	0.629307	0.17707	0.11337
A137	0.193568	0.647736	0.18828	0.11356
A138	0.182949	0.645333	0.178344	0.113274
A139	0.186893	0.643029	0.180382	0.112892
A140	0.206614	0.645232	0.214268	0.114324
	0.163265	0.163265	0.244898	0.428571
	Weighted normalized matrix
	C1	C2	C3	C4		Si	λ
A1	0.0339805	0.105589	0.0443624	0.0488528		0.232785	0.5
A2	0.0326926	0.0921391	0.0470454	0.0488528		0.22073
A3	0.0292252	0.101812	0.0423658	0.0488528		0.222255
A4	0.0290271	0.0928504	0.0506019	0.0512453		0.223725
A5	0.032445	0.103169	0.0460471	0.0488937		0.230555
A6	0.0301664	0.104093	0.0451735	0.0488937		0.228326
A7	0.0330889	0.102842	0.0462966	0.0492822		0.23151
A8	0.0376956	0.107347	0.0447992	0.0487301		0.238572
A9	0.0410144	0.108901	0.0459847	0.0489755		0.244875
A10	0.0305131	0.120061	0.0373118	0.0429225		0.230809
A11	0.0297701	0.10321	0.0427402	0.048546		0.224266
A12	0.0291757	0.103578	0.0440504	0.0492413		0.226045
A13	0.0314047	0.107543	0.0444872	0.0485665		0.232002
A14	0.0301168	0.102229	0.0438009	0.0492617		0.225408
A15	0.0285813	0.103382	0.0438009	0.0486074		0.224371
A16	0.0320982	0.103741	0.0429273	0.0485051		0.227272
A17	0.0287794	0.10034	0.0467958	0.0493844		0.2253
A18	0.0302159	0.102147	0.043988	0.0487301		0.225081
A19	0.0303645	0.0968814	0.0427402	0.0484847		0.218471
A20	0.0388844	0.107494	0.0595866	0.0494458		0.255411
A21	0.0385377	0.115368	0.0442376	0.0493231		0.247466
A22	0.0374479	0.10469	0.0440504	0.0492822		0.23547
A23	0.0304636	0.108124	0.0467334	0.0492004		0.234521
A24	0.0296215	0.105189	0.0495411	0.0494662		0.233817
A25	0.0280364	0.0971103	0.0428649	0.0515929		0.219605
A26	0.030315	0.101754	0.044924	0.048771		0.225764
A27	0.0291757	0.10209	0.0431769	0.0490572		0.2235
A28	0.0280859	0.0861458	0.0441752	0.0497321		0.208139
A29	0.0307113	0.102703	0.0441752	0.0488323		0.226422
A30	0.0293738	0.105115	0.0405564	0.0479939		0.223039
A31	0.0387853	0.103521	0.0710672	0.0530039		0.266377
A32	0.0315533	0.105115	0.0447368	0.428571		0.609976
A33	0.0298196	0.101043	0.0434889	0.0487301		0.223082
A34	0.0292252	0.0830143	0.0514754	0.0486892		0.212404
A35	0.0269962	0.0719681	0.0475445	0.0493435		0.195852
A36	0.0398256	0.103872	0.0457975	0.0490572		0.238552
A37	0.0291757	0.100119	0.0435513	0.0493435		0.22219
A38	0.0294729	0.102834	0.0454231	0.0486687		0.226398
A39	0.0302159	0.100561	0.0444872	0.0495685		0.224832
A40	0.0313057	0.101051	0.0448616	0.0488119		0.22603
A41	0.0298196	0.103226	0.0441752	0.0489346		0.226156
A42	0.0311075	0.111116	0.0407435	0.0487505		0.231718
A43	0.031801	0.10379	0.0491044	0.0490572		0.233753
A44	0.0309589	0.107004	0.0441752	0.0485869		0.230725
A45	0.0316029	0.0966606	0.0527233	0.0492004		0.230187
A46	0.0313552	0.104673	0.0447992	0.0486278		0.229456
A47	0.0344759	0.0988355	0.0593371	0.0497116		0.24236
A48	0.0279373	0.101288	0.0452983	0.0515725		0.226097
A49	0.0332375	0.163265	0.244898	0.0509999		0.4924
A50	0.0308103	0.102122	0.0489172	0.0490368		0.230887
A51	0.0308599	0.0994324	0.041929	0.0484847		0.220706
A52	0.0344263	0.105148	0.0448616	0.0487505		0.233186
A53	0.0246185	0.102662	0.0464838	0.0486892		0.222454
A54	0.0302159	0.105336	0.0451111	0.0486483		0.229311
A55	0.0307113	0.104837	0.0432393	0.0488937		0.227681
A56	0.0323459	0.154279	0.0414923	0.048546		0.276663
A57	0.0293243	0.106995	0.0431145	0.0491186		0.228553
A58	0.0323954	0.101109	0.0560926	0.0498752		0.239472
A59	0.0273925	0.102654	0.0445496	0.0487505		0.223346
A60	0.0301168	0.101804	0.0438633	0.0491595		0.224943
A61	0.0338319	0.0963008	0.0457975	0.0545171		0.230447
A62	0.163265	0.108713	0.0842948	0.0552124		0.411485
A63	0.0176342	0.0781903	0.0318835	0.0387714		0.166479
A64	0.0282345	0.108672	0.0474197	0.049139		0.233465
A65	0.0322964	0.112155	0.0476693	0.0483415		0.240462
A66	0.0289776	0.104829	0.0431769	0.0486687		0.225652
A67	0.0330889	0.100667	0.0455479	0.0491186		0.228422
A68	0.0292748	0.0984349	0.0473573	0.0493026		0.22437
A69	0.0291262	0.103627	0.0440504	0.0488119		0.225615
A70	0.0381909	0.118802	0.0431145	0.048546		0.248654
A71	0.0299187	0.0868654	0.0586507	0.0490981		0.224533
A72	0.0313552	0.1098	0.0428026	0.0485869		0.232545
A73	0.0323459	0.0966361	0.0416171	0.0486687		0.219268
A74	0.0310085	0.10469	0.0437385	0.0493435		0.22878
A75	0.0505745	0.104387	0.0506642	0.052554		0.25818
A76	0.059986	0.107257	0.0539088	0.0553351		0.276487
A77	0.0311571	0.10227	0.0441752	0.0489755		0.226577
A78	0.0350703	0.104142	0.0457351	0.0487914		0.233739
A79	0.0304636	0.106333	0.0445496	0.0485051		0.229852
A80	0.0308599	0.101068	0.0480437	0.0495071		0.229478
A81	0.0344263	0.104992	0.0439257	0.0483824		0.231727
A82	0.0285813	0.0897843	0.0472326	0.0496503		0.215248
A83	0.0454229	0.102907	0.0640166	0.049773		0.26212
A84	0.0316029	0.104052	0.0464838	0.0498343		0.231973
A85	0.0302654	0.103398	0.0508514	0.049139		0.233654
A86	0.0203586	0.0988764	0.0429273	0.0482393		0.210402
A87	0.0348226	0.102147	0.0474197	0.0487301		0.233119
A88	0.0290271	0.103733	0.0423034	0.0486483		0.223712
A89	0.0289776	0.0991707	0.0437385	0.0491186		0.221005
A90	0.0289776	0.0991707	0.0437385	0.0491186		0.221005
A91	0.028928	0.0991707	0.0436137	0.0490777		0.22079
A92	0.0325936	0.101885	0.043988	0.0489755		0.227442
A93	0.0282345	0.0936108	0.0476069	0.0496298		0.219082
A94	0.0308103	0.105442	0.0431769	0.0487505		0.22818
A95	0.0301664	0.102449	0.0442376	0.049548		0.226401
A96	0.0276897	0.0996531	0.0408059	0.0473191		0.215468
A97	0.029671	0.089768	0.0482933	0.0488528		0.216585
A98	0.0358133	0.110176	0.0508514	0.048955		0.245796
A99	0	0.106979	0	0		0.106979
A100	0.0343273	0.104412	0.0458599	0.0494662		0.234065
A101	0.0296215	0.0910271	0.0484804	0.0488323		0.217961
A102	0.0302654	0.105532	0.0456727	0.0489346		0.230405
A103	0.0403209	0.106014	0.0476693	0.0495071		0.243512
A104	0.0327422	0.102229	0.0518497	0.0499979		0.236818
A105	0.029572	0.098255	0.0424282	0.0487914		0.219047
A106	0.0281355	0.107633	0.0280151	0.046767		0.210551
A107	0.0291757	0.103022	0.0429897	0.0485665		0.223754
A108	0.0310085	0.102572	0.0429897	0.0486892		0.225259
A109	0.0291757	0.0850175	0.0456103	0.0485869		0.20839
A110	0.0304636	0.102801	0.0432393	0.0486483		0.225152
A111	0.0309589	0.103815	0.044924	0.0486687		0.228366
A112	0.0322468	0.103251	0.0409931	0.0360926		0.212583
A113	0.019566	0.100348	0.0445496	0.0526358		0.2171
A114	0.028928	0	0.0574652	0.048955		0.135348
A115	0.0320982	0.112269	0.053784	0.0492413		0.247393
A116	0.0316524	0.102057	0.0451735	0.048546		0.227429
A117	0.0284822	0.10361	0.0447368	0.0486483		0.225478
A118	0.0338319	0.0916649	0.0539712	0.0492617		0.22873
A119	0.0306122	0.101141	0.0457351	0.0491799		0.226668
A120	0.0297701	0.11056	0.0409307	0.047769		0.22903
A121	0.0313552	0.0956386	0.0482309	0.0485256		0.22375
A122	0.0286804	0.0902504	0.0472326	0.0493026		0.215466
A123	0.0333861	0.109669	0.0452359	0.0489959		0.237287
A124	0.0323459	0.10451	0.0439257	0.0486278		0.229409
A125	0.0343768	0.108402	0.0462342	0.0488119		0.237825
A126	0.0333366	0.101714	0.0551566	0.0494253		0.239632
A127	0.0311571	0.109767	0.0467334	0.0490777		0.236735
A128	0.0288785	0.101493	0.041929	0.0476463		0.219947
A129	0.0316524	0.108435	0.0460471	0.0486483		0.234782
A130	0.0320487	0.108467	0.0461095	0.0484847		0.23511
A131	0.0291757	0.0988273	0.044924	0.0492822		0.222209
A132	0.0416583	0.104379	0.0799896	0.0524722		0.278499
A133	0.0298196	0.102842	0.0403692	0.0483415		0.221372
A134	0.0291262	0.104142	0.0431769	0.0493231		0.225768
A135	0.0308103	0.102719	0.0442376	0.048546		0.226313
A136	0.0296215	0.102744	0.0433641	0.0485869		0.224316
A137	0.0316029	0.105753	0.0461095	0.0486687		0.232134
A138	0.0298692	0.10536	0.0436761	0.048546		0.227451
A139	0.0305131	0.104984	0.0441752	0.0483824		0.228055
A140	0.0337328	0.105344	0.0524737	0.0489959		0.240546
					Min Si	0.106979
	Normalized matrix				Max Si	0.609976
	C1	C2	C3	C4		Pi	Si+Pi	kia	kib	kic	ki	rank
A1	0.208131	0.646735	0.181146	0.11399		2.75764	2.99042	0.00718704	5.13067	0.754262	2.26702	39
A2	0.200243	0.564353	0.192102	0.11399		2.74181	2.96254	0.00712004	5.00103	0.74723	2.217	108
A3	0.179005	0.623598	0.172994	0.11399		2.72592	2.94817	0.0070855	4.99826	0.743605	2.21383	112
A4	0.177791	0.56871	0.206624	0.119572		2.74836	2.97208	0.00714296	5.03604	0.749635	2.23081	87
A5	0.198726	0.631911	0.188025	0.114085		2.75447	2.98503	0.00717408	5.10643	0.752901	2.25764	51
A6	0.184769	0.63757	0.184459	0.114085		2.74364	2.97197	0.00714269	5.074	0.749606	2.2442	63
A7	0.20267	0.629908	0.189045	0.114992		2.75868	2.99019	0.00718649	5.11987	0.754203	2.26317	43
A8	0.230886	0.657502	0.18293	0.113704		2.77453	3.0131	0.00724155	5.20287	0.759982	2.29596	23
A9	0.251214	0.667017	0.187771	0.114276		2.79272	3.0376	0.00730043	5.28128	0.766161	2.32737	15
A10	0.186893	0.735377	0.152357	0.100153		2.71531	2.94612	0.00708056	5.06685	0.743087	2.23774	75
A11	0.182342	0.632161	0.174522	0.113274		2.7306	2.95487	0.0071016	5.02208	0.745294	2.22326	102
A12	0.178701	0.634415	0.179873	0.114896		2.7359	2.96194	0.00711859	5.04438	0.747078	2.23222	85
A13	0.192354	0.658704	0.181656	0.113322		2.74999	2.982	0.00716679	5.11516	0.752136	2.26026	48
A14	0.184466	0.626152	0.178854	0.114944		2.73699	2.9624	0.00711969	5.0396	0.747194	2.2306	88
A15	0.175061	0.633213	0.178854	0.113417		2.72997	2.95434	0.00710033	5.02238	0.745162	2.22329	101
A16	0.196602	0.635417	0.175287	0.113179		2.74131	2.96858	0.00713454	5.06164	0.748752	2.23932	72
A17	0.176274	0.614583	0.191083	0.11523		2.7397	2.965	0.00712595	5.04149	0.74785	2.23166	86
A18	0.185073	0.625651	0.179618	0.113704		2.73613	2.96121	0.00711683	5.03561	0.746893	2.22901	94
A19	0.185983	0.593399	0.174522	0.113131		2.7233	2.94177	0.00707012	4.96008	0.741991	2.19937	125
A20	0.238167	0.658403	0.243312	0.115374		2.82894	3.08435	0.00741278	5.41857	0.777952	2.38295	10
A21	0.236044	0.706631	0.180637	0.115087		2.78844	3.0359	0.00729635	5.30091	0.765733	2.33404	13
A22	0.229369	0.641226	0.179873	0.114992		2.76906	3.00453	0.00722095	5.16801	0.75782	2.28235	28
A23	0.18659	0.66226	0.190828	0.114801		2.75721	2.99174	0.0071902	5.14645	0.754593	2.27279	35
A24	0.181432	0.644281	0.202293	0.115421		2.76006	2.99387	0.00719534	5.14292	0.755132	2.27187	37
A25	0.171723	0.594802	0.175032	0.120384		2.7249	2.9445	0.00707668	4.97239	0.742679	2.20414	121
A26	0.18568	0.623247	0.183439	0.113799		2.73949	2.96525	0.00712655	5.0456	0.747913	2.23315	84
A27	0.178701	0.6253	0.176306	0.114467		2.72986	2.95336	0.00709796	5.01411	0.744913	2.22022	104
A28	0.172027	0.527644	0.180382	0.116042		2.70584	2.91398	0.00700333	4.8448	0.734982	2.15442	134
A29	0.188107	0.629056	0.180382	0.113942		2.74	2.96643	0.00712937	5.0523	0.748209	2.23569	77
A30	0.179915	0.64383	0.165605	0.111986		2.72148	2.94452	0.00707672	5.00083	0.742683	2.21418	111
A31	0.237561	0.634065	0.290191	0.123676		2.86606	3.13243	0.00752834	5.56084	0.79008	2.44048	6
A32	0.193265	0.64383	0.182675	1		3.35473	3.9647	0.00952858	9.29627	1	3.88104	1
A33	0.182646	0.61889	0.17758	0.113704		2.73102	2.9541	0.00709975	5.01145	0.7451	2.21939	106
A34	0.179005	0.508464	0.210191	0.113608		2.7268	2.9392	0.00706394	4.90712	0.741343	2.18027	130
A35	0.165352	0.440805	0.19414	0.115135		2.68556	2.88141	0.00692504	4.70821	0.726765	2.10119	137
A36	0.243932	0.636218	0.187006	0.114467		2.78132	3.01988	0.00725783	5.20996	0.761691	2.2995	22
A37	0.178701	0.613231	0.177834	0.115135		2.72928	2.95147	0.00709344	5.00125	0.744438	2.21539	110
A38	0.180522	0.629858	0.185478	0.11356		2.73903	2.96543	0.00712698	5.05104	0.747958	2.2351	81
A39	0.185073	0.615935	0.181656	0.11566		2.73847	2.9633	0.00712187	5.0358	0.747421	2.22939	92
A40	0.191748	0.61894	0.183185	0.113894		2.74236	2.96839	0.00713408	5.05116	0.748704	2.23559	79
A41	0.182646	0.632262	0.180382	0.114181		2.73747	2.96363	0.00712265	5.0471	0.747504	2.23343	83
A42	0.190534	0.680589	0.166369	0.113751		2.74042	2.97214	0.0071431	5.10225	0.74965	2.2542	52
A43	0.194782	0.635717	0.20051	0.114467		2.76398	2.99773	0.00720461	5.14651	0.756105	2.27373	33
A44	0.189624	0.655399	0.180382	0.11337		2.74638	2.97711	0.00715504	5.09936	0.750903	2.25394	53
A45	0.193568	0.592047	0.215287	0.114801		2.76481	2.995	0.00719805	5.11408	0.755416	2.26186	46
A46	0.192051	0.641126	0.18293	0.113465		2.74702	2.97648	0.00715353	5.08818	0.750744	2.24989	58
A47	0.211165	0.605369	0.242293	0.115994		2.80101	3.04337	0.0073143	5.26665	0.767617	2.32309	17
A48	0.171117	0.620393	0.184968	0.120336		2.73962	2.96572	0.00712766	5.04885	0.74803	2.23437	82
A49	0.20358	1	1	0.119		3.17276	3.66517	0.00880869	8.00225	0.924449	3.38091	2
A50	0.188714	0.625501	0.199745	0.114419		2.75688	2.98776	0.00718065	5.11211	0.753591	2.26006	49
A51	0.189017	0.609024	0.17121	0.113131		2.72617	2.94687	0.00708237	4.98404	0.743277	2.20861	117
A52	0.210862	0.64403	0.183185	0.113751		2.7601	2.99329	0.00719393	5.13706	0.754984	2.26971	38
A53	0.150789	0.628806	0.189809	0.113608		2.72071	2.94316	0.00707346	4.99453	0.742341	2.21175	113
A54	0.185073	0.645182	0.184204	0.113513		2.74457	2.97388	0.00714729	5.0842	0.75009	2.24809	60
A55	0.188107	0.642127	0.176561	0.114085		2.7399	2.96758	0.00713214	5.06396	0.748499	2.23999	70
A56	0.198119	0.944962	0.169427	0.113274		2.79916	3.07582	0.00739229	5.58532	0.775802	2.44042	7
A57	0.179612	0.655349	0.176051	0.11461		2.73759	2.96614	0.00712869	5.06963	0.748137	2.24177	68
A58	0.198422	0.619291	0.229045	0.116376		2.78749	3.02696	0.00727486	5.22516	0.763478	2.30595	20
A59	0.167779	0.628756	0.181911	0.113751		2.72693	2.95027	0.00709055	5.00954	0.744135	2.21814	107
A60	0.184466	0.623548	0.179108	0.114706		2.73624	2.96118	0.00711677	5.03444	0.746886	2.22859	99
A61	0.207221	0.589844	0.187006	0.127207		2.76732	2.99777	0.00720469	5.1192	0.756114	2.26409	41
A62	1	0.665865	0.344204	0.128829		3.1214	3.53289	0.00849078	7.19085	0.891085	3.07573	3
A63	0.10801	0.478916	0.130191	0.0904666		2.54614	2.71262	0.00651939	4.28426	0.684193	1.92568	138
A64	0.172937	0.665615	0.193631	0.114658		2.75079	2.98425	0.00717221	5.12969	0.752705	2.26573	40
A65	0.197816	0.686949	0.19465	0.112797		2.77038	3.01084	0.00723611	5.21608	0.759411	2.30028	21
A66	0.177488	0.642077	0.176306	0.11356		2.73169	2.95734	0.00710753	5.03619	0.745917	2.22862	98
A67	0.20267	0.616587	0.185987	0.11461		2.75224	2.98066	0.00716358	5.08411	0.751799	2.24909	59
A68	0.179308	0.602915	0.193376	0.11504		2.74059	2.96496	0.00712584	5.03374	0.747839	2.22892	96
A69	0.178398	0.634716	0.179873	0.113894		2.73428	2.95989	0.00711367	5.03862	0.746561	2.22987	90
A70	0.23392	0.727664	0.176051	0.113274		2.785	3.03365	0.00729093	5.30832	0.765164	2.33631	11
A71	0.183252	0.532051	0.23949	0.114562		2.75993	2.98446	0.00717271	5.05599	0.752758	2.23974	71
A72	0.192051	0.672526	0.174777	0.11337		2.74684	2.97939	0.00716053	5.11686	0.751479	2.26046	47
A73	0.198119	0.591897	0.169936	0.11356		2.72721	2.94647	0.00708142	4.97171	0.743176	2.2042	120
A74	0.189927	0.641226	0.178599	0.115135		2.74427	2.97305	0.0071453	5.07892	0.749881	2.2461	61
A75	0.309769	0.639373	0.206879	0.122626		2.84211	3.10029	0.00745109	5.45856	0.781973	2.39949	9
A76	0.367415	0.656951	0.220127	0.129115		2.88907	3.16556	0.00760796	5.68001	0.798436	2.48757	5
A77	0.190837	0.626402	0.180382	0.114276		2.74165	2.96823	0.00713371	5.05552	0.748664	2.23711	76
A78	0.214806	0.637871	0.186752	0.113847		2.76426	2.998	0.00720525	5.14668	0.756172	2.27383	32
A79	0.18659	0.651292	0.181911	0.113179		2.7445	2.97435	0.00714841	5.08917	0.750207	2.24992	57
A80	0.189017	0.61904	0.196178	0.115517		2.75416	2.98364	0.00717074	5.09604	0.75255	2.25376	54
A81	0.210862	0.643079	0.179363	0.112892		2.7552	2.98693	0.00717864	5.11817	0.75338	2.26208	45
A82	0.175061	0.54993	0.192866	0.115851		2.72468	2.93992	0.00706568	4.93143	0.741525	2.18897	128
A83	0.278216	0.630308	0.261401	0.116137		2.8563	3.11842	0.00749467	5.5106	0.786546	2.42062	8
A84	0.193568	0.63732	0.189809	0.11628		2.75725	2.98922	0.00718415	5.12266	0.753958	2.26401	42
A85	0.185376	0.633313	0.207643	0.114658		2.76332	2.99698	0.0072028	5.14489	0.755915	2.27304	34
A86	0.124697	0.605619	0.175287	0.112558		2.6782	2.8886	0.00694233	4.83633	0.728579	2.14757	135
A87	0.213289	0.625651	0.193631	0.113704		2.76612	2.99924	0.00720822	5.14288	0.756484	2.27268	36
A88	0.177791	0.635367	0.172739	0.113513		2.72697	2.95068	0.00709153	5.013	0.744237	2.21942	105
A89	0.177488	0.607422	0.178599	0.11461		2.72693	2.94793	0.00708492	4.98765	0.743544	2.21005	114
A90	0.177488	0.607422	0.178599	0.11461		2.72693	2.94793	0.00708492	4.98765	0.743544	2.21005	114
A91	0.177184	0.607422	0.178089	0.114515		2.72611	2.9469	0.00708245	4.98477	0.743285	2.20888	116
A92	0.199636	0.624048	0.179618	0.114276		2.74604	2.97348	0.00714632	5.0683	0.749988	2.24242	64
A93	0.172937	0.573367	0.194395	0.115803		2.7306	2.94968	0.00708914	4.97362	0.743987	2.20536	119
A94	0.188714	0.645833	0.176306	0.113751		2.74044	2.96862	0.00713465	5.0692	0.748763	2.242	66
A95	0.184769	0.627504	0.180637	0.115612		2.7401	2.9665	0.00712956	5.05221	0.748229	2.23568	78
A96	0.1696	0.610377	0.166624	0.110411		2.70476	2.92022	0.00701833	4.91214	0.736556	2.17916	131
A97	0.181735	0.54983	0.197197	0.11399		2.73016	2.94674	0.00708207	4.9498	0.743245	2.1965	126
A98	0.219357	0.67483	0.207643	0.114228		2.79352	3.03932	0.00730455	5.29074	0.766594	2.33097	14
A99	0	0.655248	0	0		0.933309	1.04029	0.00250018	2	0.262388	0.864438	140
A100	0.210255	0.639523	0.187261	0.115421		2.7647	2.99877	0.00720711	5.15021	0.756367	2.27519	30
A101	0.181432	0.557542	0.197962	0.113942		2.73258	2.95054	0.0070912	4.96526	0.744203	2.20254	122
A102	0.185376	0.646384	0.186497	0.114181		2.74805	2.97846	0.00715829	5.09815	0.751244	2.25372	55
A103	0.246966	0.649339	0.19465	0.115517		2.79412	3.03763	0.00730049	5.27003	0.766168	2.32341	16
A104	0.200546	0.626152	0.21172	0.116662		2.77761	3.01443	0.00724474	5.18978	0.760317	2.29155	24
A105	0.181129	0.601813	0.173248	0.113847		2.72204	2.94108	0.00706846	4.96411	0.741817	2.20069	124
A106	0.17233	0.659255	0.114395	0.109123		2.6597	2.87025	0.00689823	4.8179	0.723952	2.13828	136
A107	0.178701	0.63101	0.175541	0.113322		2.72884	2.95259	0.00709612	5.0154	0.74472	2.22056	103
A108	0.189927	0.628255	0.175541	0.113608		2.73615	2.96141	0.00711731	5.0373	0.746943	2.22964	91
A109	0.178701	0.520733	0.186242	0.11337		2.7098	2.91819	0.00701345	4.85139	0.736044	2.15739	133
A110	0.18659	0.629657	0.176561	0.113513		2.73507	2.96022	0.00711445	5.03514	0.746644	2.22869	97
A111	0.189624	0.635867	0.183439	0.11356		2.74478	2.97315	0.00714552	5.07559	0.749904	2.24494	62
A112	0.197512	0.632412	0.167389	0.0842161		2.68707	2.89965	0.00696889	4.86622	0.731367	2.15981	132
A113	0.119842	0.614633	0.181911	0.122817		2.69672	2.91382	0.00700293	4.91878	0.73494	2.18053	129
A114	0.177184	0	0.23465	0.114228		1.84966	1.985	0.00477067	3.24701	0.500669	1.44876	139
A115	0.196602	0.68765	0.219618	0.114896		2.79297	3.04036	0.00730706	5.30507	0.766857	2.33619	12
A116	0.193871	0.6251	0.184459	0.113274		2.74543	2.97286	0.00714482	5.06752	0.749831	2.24205	65
A117	0.174454	0.634615	0.182675	0.113513		2.73343	2.95891	0.0071113	5.03643	0.746312	2.22895	95
A118	0.207221	0.561448	0.220382	0.114944		2.76961	2.99834	0.00720607	5.10559	0.756258	2.25937	50
A119	0.1875	0.619491	0.186752	0.114753		2.7441	2.97077	0.0071398	5.05899	0.749304	2.23872	73
A120	0.182342	0.677183	0.167134	0.111461		2.7315	2.96053	0.00711521	5.06757	0.746723	2.24019	69
A121	0.192051	0.585787	0.196943	0.113226		2.74509	2.96885	0.00713518	5.03278	0.748819	2.22917	93
A122	0.175667	0.552784	0.192866	0.11504		2.72467	2.94014	0.0070662	4.93346	0.741579	2.18972	127
A123	0.20449	0.671725	0.184713	0.114324		2.76484	3.00213	0.00721517	5.18047	0.757213	2.28638	26
A124	0.198119	0.640124	0.179363	0.113465		2.7475	2.97691	0.00715457	5.08826	0.750853	2.24999	56
A125	0.210558	0.663962	0.18879	0.113894		2.76966	3.00749	0.00722806	5.19067	0.758566	2.2908	25
A126	0.204187	0.622997	0.225223	0.115326		2.78758	3.02721	0.00727547	5.22676	0.763541	2.30655	19
A127	0.190837	0.672326	0.190828	0.114515		2.7619	2.99863	0.00720677	5.17216	0.756332	2.28292	27
A128	0.176881	0.621645	0.17121	0.111175		2.71812	2.93807	0.00706122	4.96833	0.741057	2.20172	123
A129	0.193871	0.664163	0.188025	0.113513		2.7581	2.99288	0.00719295	5.14984	0.754882	2.27416	31
A130	0.196299	0.664363	0.18828	0.113131		2.75935	2.99446	0.00719676	5.15425	0.755281	2.27596	29
A131	0.178701	0.605319	0.183439	0.114992		2.73212	2.95432	0.00710029	5.00447	0.745157	2.21696	109
A132	0.255158	0.639323	0.326624	0.122435		2.89653	3.17503	0.00763073	5.70681	0.800825	2.49847	4
A133	0.182646	0.629908	0.164841	0.112797		2.72051	2.94188	0.00707037	4.98421	0.742018	2.20791	118
A134	0.178398	0.637871	0.176306	0.115087		2.73358	2.95935	0.00711236	5.0393	0.746423	2.23003	89
A135	0.188714	0.629157	0.180637	0.113274		2.73966	2.96598	0.00712829	5.05092	0.748096	2.23514	80
A136	0.181432	0.629307	0.17707	0.11337		2.73176	2.95608	0.0071045	5.02378	0.745599	2.22405	100
A137	0.193568	0.647736	0.18828	0.11356		2.75438	2.98651	0.00717765	5.12109	0.753275	2.26304	44
A138	0.182949	0.645333	0.178344	0.113274		2.73761	2.96506	0.0071261	5.05936	0.747865	2.23798	74
A139	0.186893	0.643029	0.180382	0.112892		2.74097	2.96903	0.00713562	5.0686	0.748865	2.24185	67
A140	0.206614	0.645232	0.214268	0.114324		2.78448	3.02503	0.00727021	5.23199	0.76299	2.30806	18
					Min Pi	0.933309	416.085
					Max Pi	3.35473

## Sheet: 20_03
2020/03	C1	C2	C3	C4
A1	-2.31	-19.12	-0.32	0.54
A2	-1.22	8.94	-0.85	-0.2
A3	-0.66	-12.25	-0.18	-4.46
A4	-0.08	28.04	-0.55	2.07
A5	-1.47	-9.97	-0.41	-0.08
A6	-0.98	-14.17	-0.42	-0.33
A7	-1.87	-2.89	-0.59	-0.67
A8	-2.36	-14.01	0.25	1.35
A9	-1.63	-27.07	0.49	3.53
A10	0.45	3	0.02	25.79
A11	-0.89	-7.23	-0.53	-1.37
A12	-0.52	-11.86	-0.21	-3.23
A13	-0.97	-7.1	-0.51	-0.98
A14	-0.82	-2.87	-0.28	-3.23
A15	-0.7	-27.72	-0.81	0.3
A16	-2.22	-21.83	-0.35	-0.45
A17	-0.56	-21.89	-0.48	-1.85
A18	-0.88	-5.09	-0.12	-0.31
A19	-1.93	-13.25	-0.21	-0.03
A20	-4.6	-31.97	-4.44	4.85
A21	0.32	-35.89	0.43	0.42
A22	-0.41	-7.3	0.14	0.81
A23	-0.96	-27.66	-0.32	-0.59
A24	-0.7	-5.05	-1.02	-0.76
A25	0.08	13	-0.09	-8.13
A26	-0.83	7.03	-0.13	0.24
A27	-0.65	-1.75	-0.23	-2.31
A28	-0.15	13.94	-0.22	-3.41
A29	-1.21	-5.09	-0.32	-0.96
A30	-0.37	0.92	-0.05	-4.35
A31	-0.45	-4.52	4.72	47.11
A32	-0.45	-20.56	-0.03	57.96
A33	-0.96	-13.02	-0.15	-1.27
A34	-0.85	19.01	0.64	0.64
A35	1.25	17.01	-1.77	-1.68
A36	-3.81	-8.65	-0.57	-0.05
A37	-0.49	0.09	-0.26	-3.2
A38	-1.47	-5.99	-0.37	-0.23
A39	-0.93	6.23	-0.35	-2.08
A40	-1.14	-4.64	-0.38	-0.18
A41	-0.87	-10.51	-0.21	-1.93
A42	-0.75	9	-0.81	-0.08
A43	-1.28	-18.37	-0.57	0.13
A44	-0.61	-14.19	0.01	0.74
A45	-1.26	-12.97	0.87	1.72
A46	-1.33	-14.81	-0.37	-0.73
A47	-1.87	4.22	-2.16	1.33
A48	-2.82	8.55	-0.52	41.65
A49	-1.81	-120.05	-21.73	0.67
A50	-1.04	-23	1.07	1.27
A51	-1.04	-9.84	-0.45	-0.1
A52	-2.93	-28.3	-0.56	1.96
A53	-1.17	-8.72	-0.62	0.02
A54	-0.82	-4.89	-0.52	0.07
A55	-1.06	-4.64	-0.13	-0.95
A56	-1	-28.98	0.63	-1.42
A57	-0.24	4.24	-0.15	-1.83
A58	-0.18	16.76	-1.16	0.98
A59	-1.22	-16.59	-0.6	-0.47
A60	-1.06	-10.57	-0.25	-2.12
A61	3.08	-6.87	1.26	11.79
A62	-16.04	-28.09	4.46	16.4
A63	-0.62	27.29	-1.18	0.92
A64	-1.09	-29.4	-0.86	-0.29
A65	-2.56	-26.33	-1.03	0.61
A66	-0.75	-12.39	0.08	0.31
A67	-0.98	-0.81	-0.17	-0.29
A68	-0.41	32.16	-0.68	-0.08
A69	-0.62	-10.69	-0.38	-1.92
A70	-2.81	-27.15	-0.21	-0.17
A71	0.01	40.41	3.29	1.78
A72	-0.63	-10.95	0.02	-3.84
A73	-0.29	-16.84	0.4	3.89
A74	-0.54	2.96	-0.2	-2.26
A75	-4.32	-10.58	-0.86	1.54
A76	-3.16	-12.45	-0.69	4.7
A77	-1.75	-12.14	-0.42	-0.96
A78	-2.76	-18.81	0.08	1.63
A79	-0.67	12.55	-0.21	0.63
A80	-0.66	-4.64	-0.42	-0.26
A81	-3.28	-13.55	-0.43	1.44
A82	-0.33	-3.2	-0.68	-5.97
A83	-2.59	2.34	-0.67	9.49
A84	-0.79	-18.63	0.04	0.14
A85	-1.48	-40.8	-1.05	-1.19
A86	-0.67	-9.11	-0.22	0.5
A87	-4.54	-2.31	-1.25	7.44
A88	-0.84	-14.09	-0.31	-1.95
A89	-0.72	-6.43	-0.19	-1.81
A90	-0.72	-6.43	-0.2	-1.82
A91	-0.72	-6.43	-0.2	-1.82
A92	-1.05	0.64	-0.19	-0.37
A93	-0.67	0.4	-0.74	-2.16
A94	-0.99	-12.08	0.01	-1.27
A95	-0.77	-12.44	-0.14	-2.77
A96	-2.42	-5.13	-1.1	2.04
A97	-0.94	-54.59	0.79	-1.06
A98	-1.94	-12.28	-1.04	1.68
A99	-1.78	-1.67	-0.28	57.61
A100	-0.93	-7.98	-0.41	-0.57
A101	0.42	32.25	0.49	2.01
A102	-1.77	-50.28	-0.56	0.36
A103	-4.6	-14.24	-0.39	7.9
A104	-0.04	-6.24	-0.48	1.15
A105	-0.41	0.41	-0.83	-4.71
A106	-0.05	0.29	0.58	0.62
A107	-0.85	-15.93	-0.32	-1.31
A108	-1.05	-3.15	0.08	-0.89
A109	-0.41	22.73	1.9	0.45
A110	-0.86	-0.87	-0.02	-0.8
A111	-1.31	-7.09	0.3	0.65
A112	3.22	-0.08	0.21	37.06
A113	0.76	5.82	1.44	6.08
A114	-0.6	146.32	-0.56	0.15
A115	-1.02	-14.42	-0.3	0.59
A116	-2.01	-12.13	-0.07	-0.14
A117	-0.31	-38.52	0.27	1.93
A118	-0.72	2.65	0.68	0.86
A119	-0.81	-4.17	-0.2	-0.96
A120	-0.98	-12.63	-0.08	-9.31
A121	-1.3	13.63	-0.52	-0.08
A122	-0.55	-60.88	1.3	-2
A123	-0.66	-23.45	-0.25	4.92
A124	-0.81	-6.66	0.01	0.01
A125	-1.61	-32.79	0.23	6.52
A126	-0.47	9.14	1.6	3.28
A127	-1.12	-44.64	0.02	1.23
A128	-0.47	3.48	-0.32	-2.69
A129	-1.86	-24	-0.67	-0.08
A130	-1.37	-3.4	-1.03	0.07
A131	-0.55	-1.14	-0.04	-1.39
A132	-1.64	-29.87	-4.33	4.26
A133	-1.65	-25.71	-0.67	-0.48
A134	-0.9	-23.94	-0.17	0.12
A135	-1.83	-4.03	-0.09	-0.14
A136	-0.36	-3.54	-0.19	-2.07
A137	-1.6	-24.48	-0.69	0.25
A138	-0.67	-3.54	-0.25	-0.62
A139	-1.58	-17.69	-0.89	0.07
A140	-1.03	0.73	-0.61	0.47
MAX	3.22	146.32	4.72	57.96
MIN	-16.04	-120.05	-21.73	-9.31
	1	1	1	1
	Normalization
	C1	C2	C3	C4
A1	0.712876	0.378909	0.809452	0.146425
A2	0.76947	0.484251	0.789414	0.135424
A3	0.798546	0.4047	0.814745	0.0720975
A4	0.82866	0.555956	0.800756	0.169169
A5	0.75649	0.41326	0.806049	0.137208
A6	0.781931	0.397492	0.805671	0.133492
A7	0.735722	0.439839	0.799244	0.128438
A8	0.71028	0.398093	0.831002	0.158466
A9	0.748183	0.349063	0.840076	0.190873
A10	0.856179	0.461951	0.822306	0.521778
A11	0.786604	0.423546	0.801512	0.118032
A12	0.805815	0.406164	0.813611	0.090382
A13	0.782451	0.424034	0.802268	0.123829
A14	0.790239	0.439914	0.810964	0.090382
A15	0.796469	0.346623	0.790926	0.142857
A16	0.717549	0.368735	0.808318	0.131708
A17	0.803738	0.36851	0.803403	0.110896
A18	0.787124	0.43158	0.817013	0.133789
A19	0.732606	0.400946	0.813611	0.137952
A20	0.593977	0.330668	0.653686	0.210495
A21	0.849429	0.315951	0.837807	0.144641
A22	0.811526	0.423283	0.826843	0.150439
A23	0.78297	0.346848	0.809452	0.129627
A24	0.796469	0.43173	0.782987	0.1271
A25	0.836968	0.499493	0.818147	0.0175413
A26	0.78972	0.477081	0.816635	0.141965
A27	0.799065	0.444119	0.812854	0.104058
A28	0.825026	0.503022	0.813233	0.0877063
A29	0.76999	0.43158	0.809452	0.124127
A30	0.813603	0.454143	0.81966	0.0737327
A31	0.80945	0.43372	1	0.83871
A32	0.80945	0.373503	0.820416	1
A33	0.78297	0.40181	0.815879	0.119518
A34	0.788681	0.522056	0.845747	0.147911
A35	0.897715	0.514547	0.754631	0.113424
A36	0.634995	0.418215	0.8	0.137654
A37	0.807373	0.451027	0.81172	0.090828
A38	0.75649	0.428201	0.807561	0.134978
A39	0.784528	0.474077	0.808318	0.107477
A40	0.773624	0.43327	0.807183	0.135722
A41	0.787643	0.411232	0.813611	0.109707
A42	0.793873	0.484476	0.790926	0.137208
A43	0.766355	0.381725	0.8	0.14033
A44	0.801142	0.397417	0.821928	0.149398
A45	0.767394	0.401997	0.854442	0.163966
A46	0.763759	0.39509	0.807561	0.127546
A47	0.735722	0.466532	0.739887	0.158169
A48	0.686397	0.482787	0.80189	0.757544
A49	0.738837	0	0	0.148357
A50	0.778816	0.364343	0.862004	0.157277
A51	0.778816	0.413748	0.804537	0.136911
A52	0.680685	0.344446	0.800378	0.167534
A53	0.772066	0.417952	0.79811	0.138695
A54	0.790239	0.432331	0.80189	0.139438
A55	0.777778	0.43327	0.816635	0.124275
A56	0.780893	0.341893	0.845369	0.117289
A57	0.820353	0.466607	0.815879	0.111194
A58	0.823468	0.513609	0.777694	0.152966
A59	0.76947	0.388407	0.798866	0.131411
A60	0.777778	0.411007	0.812098	0.106883
A61	0.992731	0.424898	0.869187	0.313661
A62	0	0.345234	0.99017	0.382191
A63	0.800623	0.55314	0.776938	0.152074
A64	0.77622	0.340316	0.789036	0.134087
A65	0.699896	0.351841	0.782609	0.147465
A66	0.793873	0.404175	0.824575	0.143006
A67	0.781931	0.447648	0.815123	0.134087
A68	0.811526	0.571423	0.795841	0.137208
A69	0.800623	0.410557	0.807183	0.109856
A70	0.686916	0.348763	0.813611	0.13587
A71	0.833333	0.602395	0.945936	0.164858
A72	0.800104	0.409581	0.822306	0.0813141
A73	0.817757	0.387469	0.836673	0.196224
A74	0.804777	0.461801	0.813989	0.104802
A75	0.608515	0.41097	0.789036	0.16129
A76	0.668744	0.403949	0.795463	0.208265
A77	0.741952	0.405113	0.805671	0.124127
A78	0.689512	0.380073	0.824575	0.162628
A79	0.798027	0.497804	0.813611	0.147763
A80	0.798546	0.43327	0.805671	0.134532
A81	0.662513	0.39982	0.805293	0.159804
A82	0.81568	0.438676	0.795841	0.0496507
A83	0.698339	0.459474	0.796219	0.279471
A84	0.791796	0.380749	0.823062	0.140479
A85	0.755971	0.297518	0.781853	0.120708
A86	0.798027	0.416488	0.813233	0.14583
A87	0.597092	0.442017	0.774291	0.248997
A88	0.7892	0.397793	0.80983	0.10941
A89	0.795431	0.42655	0.814367	0.111491
A90	0.795431	0.42655	0.813989	0.111342
A91	0.795431	0.42655	0.813989	0.111342
A92	0.778297	0.453092	0.814367	0.132897
A93	0.798027	0.452191	0.793573	0.106288
A94	0.781412	0.405338	0.821928	0.119518
A95	0.792835	0.403987	0.816257	0.0972202
A96	0.707165	0.43143	0.779962	0.168723
A97	0.784008	0.245748	0.851418	0.12264
A98	0.732087	0.404588	0.782231	0.163371
A99	0.740395	0.444419	0.810964	0.994797
A100	0.784528	0.420731	0.806049	0.129924
A101	0.854621	0.571761	0.840076	0.168277
A102	0.740914	0.261929	0.800378	0.143749
A103	0.593977	0.397229	0.806805	0.255835
A104	0.830737	0.427263	0.803403	0.155493
A105	0.811526	0.452228	0.79017	0.0683812
A106	0.830218	0.451778	0.843478	0.147614
A107	0.788681	0.390885	0.809452	0.118924
A108	0.778297	0.438863	0.824575	0.125167
A109	0.811526	0.536021	0.893384	0.145087
A110	0.788162	0.447423	0.820794	0.126505
A111	0.764798	0.424072	0.832892	0.14806
A112	1	0.450389	0.82949	0.689312
A113	0.872274	0.472538	0.875992	0.22878
A114	0.801661	1	0.800378	0.140627
A115	0.779855	0.396554	0.810208	0.147168
A116	0.728453	0.405151	0.818904	0.136316
A117	0.816719	0.306078	0.831758	0.167088
A118	0.795431	0.460637	0.847259	0.151182
A119	0.790758	0.435034	0.813989	0.124127
A120	0.781931	0.403274	0.818526	0
A121	0.765317	0.501858	0.80189	0.137208
A122	0.804258	0.222135	0.870699	0.108667
A123	0.798546	0.362653	0.812098	0.211536
A124	0.790758	0.425686	0.821928	0.138546
A125	0.749221	0.327589	0.830246	0.23532
A126	0.808411	0.485002	0.882042	0.187156
A127	0.774663	0.283102	0.822306	0.156682
A128	0.808411	0.463753	0.809452	0.0984094
A129	0.736241	0.360589	0.796219	0.137208
A130	0.761682	0.437925	0.782609	0.139438
A131	0.804258	0.446409	0.820038	0.117735
A132	0.747664	0.338552	0.657845	0.201724
A133	0.747144	0.354169	0.796219	0.131262
A134	0.786085	0.360814	0.815123	0.140181
A135	0.737799	0.43556	0.818147	0.136316
A136	0.814123	0.437399	0.814367	0.107626
A137	0.74974	0.358787	0.795463	0.142114
A138	0.798027	0.437399	0.812098	0.129181
A139	0.750779	0.384278	0.787902	0.139438
A140	0.779335	0.453429	0.798488	0.145384
	0.163265	0.163265	0.244898	0.428571
	Weighted normalized matrix
	C1	C2	C3	C4		Si	λ
A1	0.116388	0.0618626	0.198233	0.0627534		0.439237	0.5
A2	0.125628	0.0790613	0.193326	0.058039		0.456054
A3	0.130375	0.0660734	0.199529	0.0308989		0.426876
A4	0.135291	0.0907682	0.196104	0.0725009		0.494664
A5	0.123508	0.0674709	0.1974	0.0588035		0.447183
A6	0.127662	0.0648966	0.197307	0.0572108		0.447077
A7	0.120118	0.0718104	0.195733	0.0550446		0.442706
A8	0.115964	0.0649946	0.203511	0.0679139		0.452383
A9	0.122152	0.0569898	0.205733	0.0818025		0.466677
A10	0.139784	0.0754205	0.201381	0.223619		0.640205
A11	0.128425	0.0691503	0.196289	0.050585		0.444449
A12	0.131561	0.0663124	0.199252	0.0387351		0.435861
A13	0.127747	0.0692299	0.196474	0.0530697		0.44652
A14	0.129018	0.0718226	0.198603	0.0387351		0.43818
A15	0.130036	0.0565914	0.193696	0.0612244		0.441548
A16	0.117151	0.0602016	0.197955	0.0564462		0.431754
A17	0.131222	0.0601648	0.196752	0.047527		0.435666
A18	0.12851	0.0704619	0.200085	0.0573382		0.456395
A19	0.119609	0.0654605	0.199252	0.059122		0.443443
A20	0.0969757	0.0539865	0.160086	0.0902121		0.401261
A21	0.138682	0.0515838	0.205177	0.0619889		0.457432
A22	0.132494	0.0691074	0.202492	0.0644736		0.468567
A23	0.127832	0.0566282	0.198233	0.0555543		0.438247
A24	0.130036	0.0704864	0.191752	0.0544713		0.446745
A25	0.136648	0.0815498	0.200363	0.00751767		0.426078
A26	0.128934	0.0778906	0.199992	0.0608422		0.467659
A27	0.130459	0.0725091	0.199066	0.0445964		0.446631
A28	0.134698	0.0821259	0.199159	0.0375884		0.453571
A29	0.125712	0.0704619	0.198233	0.0531971		0.447604
A30	0.132833	0.0741456	0.200733	0.0315997		0.439311
A31	0.132155	0.0708113	0.244898	0.359447		0.807311
A32	0.132155	0.06098	0.200918	0.428571		0.822624
A33	0.127832	0.0656014	0.199807	0.0512221		0.444462
A34	0.128764	0.0852334	0.207122	0.0633905		0.48451
A35	0.146566	0.0840076	0.184808	0.04861		0.463991
A36	0.103672	0.0682799	0.195918	0.0589946		0.426865
A37	0.131816	0.0736369	0.198789	0.0389262		0.443168
A38	0.123508	0.0699103	0.19777	0.0578478		0.449037
A39	0.128086	0.0774002	0.197955	0.0460617		0.449503
A40	0.126306	0.0707377	0.197678	0.0581664		0.452887
A41	0.128594	0.0671399	0.199252	0.0470173		0.442003
A42	0.129612	0.0790981	0.193696	0.0588035		0.46121
A43	0.125119	0.0623223	0.195918	0.0601414		0.443501
A44	0.130798	0.0648843	0.201289	0.0640276		0.460999
A45	0.125289	0.0656321	0.209251	0.0702711		0.470443
A46	0.124695	0.0645043	0.19777	0.0546624		0.441632
A47	0.120118	0.0761683	0.181197	0.0677865		0.445269
A48	0.112065	0.0788222	0.196381	0.324661		0.71193
A49	0.120626	0	0	0.0635817		0.184208
A50	0.127153	0.0594844	0.211103	0.0674042		0.465145
A51	0.127153	0.0675505	0.197029	0.0586761		0.450409
A52	0.111132	0.0562359	0.196011	0.0718001		0.435179
A53	0.126051	0.068237	0.195455	0.0594406		0.449184
A54	0.129018	0.0705845	0.196381	0.0597591		0.455743
A55	0.126984	0.0707377	0.199992	0.0532608		0.450975
A56	0.127493	0.0558191	0.207029	0.0502665		0.440607
A57	0.133935	0.0761805	0.199807	0.0476544		0.457577
A58	0.134444	0.0838544	0.190456	0.0655566		0.47431
A59	0.125628	0.0634133	0.195641	0.0563188		0.441
A60	0.126984	0.0671031	0.198881	0.0458068		0.438775
A61	0.162078	0.0693709	0.212862	0.134426		0.578738
A62	0	0.0563646	0.242491	0.163796		0.462651
A63	0.130714	0.0903085	0.19027	0.0651744		0.476467
A64	0.12673	0.0555617	0.193233	0.0574656		0.43299
A65	0.114269	0.0574434	0.191659	0.0631994		0.426571
A66	0.129612	0.0659876	0.201937	0.0612881		0.458824
A67	0.127662	0.0730853	0.199622	0.0574656		0.457835
A68	0.132494	0.0932934	0.1949	0.0588035		0.479491
A69	0.130714	0.0670295	0.197678	0.047081		0.442502
A70	0.112149	0.0569408	0.199252	0.0582301		0.426572
A71	0.136054	0.09835	0.231658	0.0706534		0.536715
A72	0.130629	0.0668702	0.201381	0.0348489		0.433729
A73	0.133511	0.0632601	0.2049	0.084096		0.485767
A74	0.131392	0.075396	0.199344	0.0449149		0.451047
A75	0.0993492	0.067097	0.193233	0.0691244		0.428804
A76	0.109182	0.0659508	0.194807	0.0892564		0.459197
A77	0.121135	0.0661408	0.197307	0.0531971		0.43778
A78	0.112573	0.0620526	0.201937	0.0696977		0.44626
A79	0.13029	0.0812739	0.199252	0.0633268		0.474142
A80	0.130375	0.0707377	0.197307	0.0576567		0.456076
A81	0.108165	0.0652766	0.197215	0.0684873		0.439144
A82	0.133172	0.0716204	0.1949	0.0212788		0.420971
A83	0.114014	0.075016	0.194993	0.119773		0.503796
A84	0.129273	0.0621629	0.201566	0.0602051		0.453207
A85	0.123424	0.0485744	0.191474	0.0517318		0.415204
A86	0.13029	0.067998	0.199159	0.0624986		0.459945
A87	0.0974843	0.0721659	0.189622	0.106713		0.465985
A88	0.128849	0.0649456	0.198326	0.0468899		0.43901
A89	0.129866	0.0696406	0.199437	0.0477818		0.446725
A90	0.129866	0.0696406	0.199344	0.0477181		0.446569
A91	0.129866	0.0696406	0.199344	0.0477181		0.446569
A92	0.127069	0.073974	0.199437	0.0569559		0.457435
A93	0.13029	0.0738269	0.194344	0.045552		0.444013
A94	0.127577	0.0661776	0.201289	0.0512221		0.446266
A95	0.129442	0.0659569	0.1999	0.0416657		0.436965
A96	0.115455	0.0704374	0.191011	0.0723098		0.449214
A97	0.128001	0.0401221	0.208511	0.05256		0.429194
A98	0.119524	0.066055	0.191567	0.0700163		0.447162
A99	0.120881	0.0725581	0.198603	0.426341		0.818383
A100	0.128086	0.0686906	0.1974	0.0556817		0.449858
A101	0.13953	0.0933486	0.205733	0.0721187		0.51073
A102	0.120965	0.0427638	0.196011	0.0616067		0.421347
A103	0.0969757	0.0648537	0.197585	0.109643		0.469058
A104	0.13563	0.0697571	0.196752	0.0666397		0.468779
A105	0.132494	0.073833	0.193511	0.0293062		0.429144
A106	0.135546	0.0737595	0.206566	0.0632631		0.479134
A107	0.128764	0.0638178	0.198233	0.0509673		0.441782
A108	0.127069	0.071651	0.201937	0.053643		0.454299
A109	0.132494	0.0875135	0.218788	0.0621801		0.500975
A110	0.128679	0.0730485	0.201011	0.0542164		0.456955
A111	0.124865	0.0692361	0.203974	0.0634542		0.461529
A112	0.163265	0.0735327	0.20314	0.295419		0.735357
A113	0.142412	0.0771489	0.214529	0.0980483		0.532138
A114	0.130883	0.163265	0.196011	0.0602688		0.550428
A115	0.127323	0.0647433	0.198418	0.063072		0.453557
A116	0.118931	0.0661469	0.200548	0.0584212		0.444047
A117	0.133342	0.0499718	0.203696	0.071609		0.458618
A118	0.129866	0.075206	0.207492	0.0647921		0.477356
A119	0.129103	0.0710258	0.199344	0.0531971		0.45267
A120	0.127662	0.0658405	0.200455	0		0.393958
A121	0.124949	0.0819359	0.196381	0.0588035		0.46207
A122	0.131307	0.0362668	0.213233	0.0465713		0.427378
A123	0.130375	0.0592086	0.198881	0.090658		0.479123
A124	0.129103	0.0694996	0.201289	0.0593769		0.459268
A125	0.122322	0.0534839	0.203326	0.100851		0.479982
A126	0.131985	0.0791839	0.21601	0.0802097		0.507389
A127	0.126475	0.0462207	0.201381	0.0671494		0.441227
A128	0.131985	0.0757147	0.198233	0.0421754		0.448108
A129	0.120202	0.0588715	0.194993	0.0588035		0.43287
A130	0.124356	0.0714978	0.191659	0.0597591		0.447272
A131	0.131307	0.072883	0.200826	0.0504576		0.455473
A132	0.122067	0.0552736	0.161105	0.0864532		0.424899
A133	0.121983	0.0578234	0.194993	0.0562551		0.431054
A134	0.12834	0.0589083	0.199622	0.0600777		0.446948
A135	0.120457	0.0711116	0.200363	0.0584212		0.450352
A136	0.132918	0.071412	0.199437	0.0461254		0.449892
A137	0.122406	0.0585773	0.194807	0.0609059		0.436697
A138	0.13029	0.071412	0.198881	0.0553632		0.455946
A139	0.122576	0.0627391	0.192956	0.0597591		0.43803
A140	0.127238	0.0740292	0.195548	0.0623075		0.459123
					Min Si	0.184208
	Normalized matrix				Max Si	0.822624
	C1	C2	C3	C4		Pi	Si+Pi	kia	kib	kic	ki	rank
A1	0.712876	0.378909	0.809452	0.146425		3.1882	3.62744	0.00706666	4.67287	0.788836	2.11936	101
A2	0.76947	0.484251	0.789414	0.135424		3.21469	3.67075	0.00715103	4.78317	0.798254	2.16398	47
A3	0.798546	0.4047	0.814745	0.0720975		3.10169	3.52857	0.00687405	4.54367	0.767336	2.06094	133
A4	0.82866	0.555956	0.800756	0.169169		3.29238	3.78705	0.0073776	5.04854	0.823545	2.27285	15
A5	0.75649	0.41326	0.806049	0.137208		3.19656	3.64374	0.00709842	4.722	0.792382	2.13885	75
A6	0.781931	0.397492	0.805671	0.133492		3.19115	3.63823	0.00708768	4.71754	0.791182	2.13657	79
A7	0.735722	0.439839	0.799244	0.128438		3.1872	3.6299	0.00707146	4.69098	0.789372	2.12609	93
A8	0.71028	0.398093	0.831002	0.158466		3.2158	3.66818	0.00714604	4.76404	0.797697	2.15687	56
A9	0.748183	0.349063	0.840076	0.190873		3.24583	3.71251	0.00723239	4.86319	0.807336	2.19767	30
A10	0.856179	0.461951	0.822306	0.521778		3.56642	4.20662	0.00819498	6.03532	0.914788	2.67577	6
A11	0.786604	0.423546	0.801512	0.118032		3.17817	3.62262	0.00705727	4.69396	0.787787	2.12622	92
A12	0.805815	0.406164	0.813611	0.090382		3.13626	3.57212	0.00695889	4.61725	0.776807	2.09258	124
A13	0.782451	0.424034	0.802268	0.123829		3.18603	3.63255	0.00707661	4.71084	0.789947	2.13347	82
A14	0.790239	0.439914	0.810964	0.090382		3.14375	3.58193	0.00697801	4.63522	0.77894	2.10021	114
A15	0.796469	0.346623	0.790926	0.142857		3.18318	3.62473	0.00706139	4.68181	0.788248	2.12218	96
A16	0.717549	0.368735	0.808318	0.131708		3.16562	3.59738	0.00700809	4.61604	0.782299	2.09537	121
A17	0.803738	0.36851	0.803403	0.110896		3.15202	3.58769	0.00698922	4.62751	0.780191	2.09821	116
A18	0.787124	0.43158	0.817013	0.133789		3.20748	3.66387	0.00713763	4.77984	0.796759	2.16192	49
A19	0.732606	0.400946	0.813611	0.137952		3.19046	3.63391	0.00707926	4.69732	0.790243	2.12885	89
A20	0.593977	0.330668	0.653686	0.210495		3.16711	3.56837	0.0069516	4.45157	0.775992	2.03334	136
A21	0.849429	0.315951	0.837807	0.144641		3.19646	3.65389	0.0071182	4.77757	0.794589	2.15984	52
A22	0.811526	0.423283	0.826843	0.150439		3.23408	3.70265	0.00721318	4.86502	0.805192	2.19706	31
A23	0.78297	0.346848	0.809452	0.129627		3.16824	3.60649	0.00702584	4.65316	0.78428	2.1097	111
A24	0.796469	0.43173	0.782987	0.1271		3.19034	3.63708	0.00708544	4.71516	0.790933	2.13558	81
A25	0.836968	0.499493	0.818147	0.0175413		2.99304	3.41912	0.00666083	4.46135	0.743534	2.01779	137
A26	0.78972	0.477081	0.816635	0.141965		3.23314	3.7008	0.00720958	4.85941	0.80479	2.19483	32
A27	0.799065	0.444119	0.812854	0.104058		3.16962	3.61625	0.00704487	4.69967	0.786404	2.12743	91
A28	0.825026	0.503022	0.813233	0.0877063		3.16598	3.61955	0.00705129	4.73473	0.787121	2.14027	73
A29	0.76999	0.43158	0.809452	0.124127		3.18851	3.63611	0.00708356	4.71851	0.790723	2.13664	78
A30	0.813603	0.454143	0.81966	0.0737327		3.12556	3.56487	0.00694477	4.62831	0.775229	2.09557	120
A31	0.80945	0.43372	1	0.83871		3.76597	4.57328	0.00890927	7.08572	0.994523	3.09383	3
A32	0.80945	0.373503	0.820416	1		3.77023	4.59285	0.00894739	7.1719	0.998778	3.12673	1
A33	0.78297	0.40181	0.815879	0.119518		3.17628	3.62074	0.00705361	4.69267	0.78738	2.12552	94
A34	0.788681	0.522056	0.845747	0.147911		3.26195	3.74646	0.00729852	4.97157	0.814719	2.2404	17
A35	0.897715	0.514547	0.754631	0.113424		3.20654	3.67053	0.00715062	4.82041	0.798208	2.17715	38
A36	0.634995	0.418215	0.8	0.137654		3.17017	3.59703	0.00700743	4.59276	0.782224	2.08708	125
A37	0.807373	0.451027	0.81172	0.090828		3.15167	3.59484	0.00700315	4.66798	0.781746	2.11346	106
A38	0.75649	0.428201	0.807561	0.134978		3.19904	3.64808	0.00710687	4.73385	0.793325	2.14361	69
A39	0.784528	0.474077	0.808318	0.107477		3.18011	3.62961	0.00707089	4.72279	0.789309	2.13733	76
A40	0.773624	0.43327	0.807183	0.135722		3.20511	3.65799	0.00712619	4.7591	0.795481	2.15382	59
A41	0.787643	0.411232	0.813611	0.109707		3.16533	3.60733	0.00702749	4.67147	0.784464	2.11629	104
A42	0.793873	0.484476	0.790926	0.137208		3.22249	3.6837	0.00717626	4.81676	0.80107	2.17754	37
A43	0.766355	0.381725	0.8	0.14033		3.18982	3.63332	0.00707813	4.69718	0.790116	2.12873	90
A44	0.801142	0.397417	0.821928	0.149398		3.22044	3.68144	0.00717186	4.81415	0.80058	2.17632	39
A45	0.767394	0.401997	0.854442	0.163966		3.24241	3.71285	0.00723306	4.88118	0.807411	2.20409	28
A46	0.763759	0.39509	0.807561	0.127546		3.179	3.62063	0.00705341	4.67927	0.787357	2.12076	98
A47	0.735722	0.466532	0.739887	0.158169		3.21666	3.66193	0.00713385	4.72604	0.796337	2.14261	70
A48	0.686397	0.482787	0.80189	0.757544		3.66349	4.37542	0.00852382	6.49437	0.951496	2.85965	5
A49	0.738837	0	0	0.148357		1.3932	1.57741	0.00307297	2	0.343029	0.910259	140
A50	0.778816	0.364343	0.862004	0.157277		3.22492	3.69007	0.00718867	4.83987	0.802456	2.18654	33
A51	0.778816	0.413748	0.804537	0.136911		3.20044	3.65085	0.00711227	4.7423	0.793927	2.14696	64
A52	0.680685	0.344446	0.800378	0.167534		3.19137	3.62655	0.00706492	4.65311	0.788642	2.11224	107
A53	0.772066	0.417952	0.79811	0.138695		3.20102	3.6502	0.00711101	4.73607	0.793787	2.14466	67
A54	0.790239	0.432331	0.80189	0.139438		3.21155	3.66729	0.0071443	4.77923	0.797503	2.16214	48
A55	0.777778	0.43327	0.816635	0.124275		3.19291	3.64388	0.0070987	4.73997	0.792412	2.14524	66
A56	0.780893	0.341893	0.845369	0.117289		3.15852	3.59912	0.0070115	4.659	0.782679	2.11083	108
A57	0.820353	0.466607	0.815879	0.111194		3.19266	3.65023	0.00711107	4.77563	0.793793	2.15868	54
A58	0.823468	0.513609	0.777694	0.152966		3.25324	3.72755	0.00726168	4.90995	0.810606	2.21616	25
A59	0.76947	0.388407	0.798866	0.131411		3.18059	3.62159	0.00705527	4.67698	0.787565	2.12007	99
A60	0.777778	0.411007	0.812098	0.106883		3.15853	3.59731	0.00700796	4.64906	0.782283	2.10707	113
A61	0.992731	0.424898	0.869187	0.313661		3.44306	4.02179	0.00783491	5.61309	0.874594	2.50273	7
A62	0	0.345234	0.99017	0.382191		2.50037	2.96302	0.0057723	4.30627	0.644349	1.9042	138
A63	0.800623	0.55314	0.776938	0.152074		3.25838	3.73484	0.0072759	4.92535	0.812193	2.22254	22
A64	0.77622	0.340316	0.789036	0.134087		3.16444	3.59743	0.00700819	4.6219	0.782309	2.09746	119
A65	0.699896	0.351841	0.782609	0.147465		3.16863	3.5952	0.00700385	4.59006	0.781825	2.08589	126
A66	0.793873	0.404175	0.824575	0.143006		3.21391	3.67273	0.0071549	4.79765	0.798686	2.16936	43
A67	0.781931	0.447648	0.815123	0.134087		3.21152	3.66935	0.00714831	4.79056	0.797951	2.16642	45
A68	0.811526	0.571423	0.795841	0.137208		3.25165	3.73114	0.00726869	4.93693	0.811388	2.22617	20
A69	0.800623	0.410557	0.807183	0.109856		3.16605	3.60855	0.00702986	4.67469	0.784728	2.11759	103
A70	0.686916	0.348763	0.813611	0.13587		3.15836	3.58493	0.00698385	4.58269	0.779592	2.08196	128
A71	0.833333	0.602395	0.945936	0.164858		3.33956	3.87627	0.00755142	5.31068	0.842949	2.37707	9
A72	0.800104	0.409581	0.822306	0.0813141		3.12299	3.55672	0.00692888	4.59616	0.773457	2.08314	127
A73	0.817757	0.387469	0.836673	0.196224		3.27916	3.76493	0.00733451	4.99075	0.818735	2.24956	16
A74	0.804777	0.461801	0.813989	0.104802		3.17783	3.62887	0.00706946	4.72953	0.789148	2.13962	74
A75	0.608515	0.41097	0.789036	0.16129		3.18811	3.61691	0.00704615	4.61616	0.786547	2.09791	118
A76	0.668744	0.403949	0.795463	0.208265		3.25484	3.71404	0.00723536	4.82905	0.807668	2.18577	34
A77	0.741952	0.405113	0.805671	0.124127		3.17268	3.61046	0.00703358	4.65381	0.785143	2.11044	110
A78	0.689512	0.380073	0.824575	0.162628		3.208	3.65426	0.00711892	4.72521	0.79467	2.14133	71
A79	0.798027	0.497804	0.813611	0.147763		3.24759	3.72173	0.00725036	4.90498	0.809342	2.21365	26
A80	0.798546	0.43327	0.805671	0.134532		3.20805	3.66412	0.00713813	4.77853	0.796814	2.16149	51
A81	0.662513	0.39982	0.805293	0.159804		3.20003	3.63918	0.00708953	4.68085	0.791389	2.12369	95
A82	0.81568	0.438676	0.795841	0.0496507		3.06315	3.48412	0.00678746	4.48395	0.75767	2.0341	135
A83	0.698339	0.459474	0.796219	0.279471		3.3486	3.85239	0.0075049	5.13846	0.837756	2.31307	12
A84	0.791796	0.380749	0.823062	0.140479		3.20139	3.6546	0.00711958	4.75817	0.794743	2.15306	61
A85	0.755971	0.297518	0.781853	0.120708		3.12137	3.53658	0.00688965	4.49443	0.769077	2.0445	134
A86	0.798027	0.416488	0.813233	0.14583		3.21939	3.67934	0.00716777	4.80767	0.800123	2.17376	40
A87	0.597092	0.442017	0.774291	0.248997		3.28483	3.75082	0.00730702	4.88743	0.815667	2.21116	27
A88	0.7892	0.397793	0.80983	0.10941		3.15943	3.59844	0.00701016	4.65098	0.782529	2.1079	112
A89	0.795431	0.42655	0.814367	0.111491		3.17496	3.62169	0.00705546	4.70401	0.787585	2.12966	86
A90	0.795431	0.42655	0.813989	0.111342		3.17463	3.6212	0.00705451	4.70293	0.787479	2.12921	87
A91	0.795431	0.42655	0.813989	0.111342		3.17463	3.6212	0.00705451	4.70293	0.787479	2.12921	87
A92	0.778297	0.453092	0.814367	0.132897		3.21069	3.66813	0.00714593	4.7878	0.797685	2.16529	46
A93	0.798027	0.452191	0.793573	0.106288		3.16988	3.6139	0.00704028	4.68565	0.785892	2.12216	97
A94	0.781412	0.405338	0.821928	0.119518		3.17892	3.62519	0.00706227	4.70436	0.788346	2.13023	83
A95	0.792835	0.403987	0.816257	0.0972202		3.14504	3.582	0.00697814	4.62955	0.778955	2.0982	117
A96	0.707165	0.43143	0.779962	0.168723		3.22414	3.67336	0.00715611	4.75282	0.798822	2.15356	60
A97	0.784008	0.245748	0.851418	0.12264		3.12448	3.55367	0.00692295	4.57261	0.772794	2.0744	129
A98	0.732087	0.404588	0.782231	0.163371		3.21468	3.66184	0.00713368	4.73489	0.796317	2.14573	65
A99	0.740395	0.444419	0.810964	0.994797		3.77584	4.59423	0.00895008	7.15291	0.999078	3.12023	2
A100	0.784528	0.420731	0.806049	0.129924		3.19492	3.64478	0.00710045	4.73535	0.792608	2.14372	68
A101	0.854621	0.571761	0.840076	0.168277		3.31157	3.8223	0.00744628	5.14953	0.831212	2.31312	11
A102	0.740914	0.261929	0.800378	0.143749		3.13818	3.55953	0.00693436	4.53984	0.774068	2.06353	131
A103	0.593977	0.397229	0.806805	0.255835		3.28486	3.75392	0.00731306	4.90413	0.816341	2.21747	24
A104	0.830737	0.427263	0.803403	0.155493		3.23875	3.70752	0.00722268	4.86952	0.806252	2.19927	29
A105	0.811526	0.452228	0.79017	0.0683812		3.10564	3.53479	0.00688617	4.55882	0.768688	2.06711	130
A106	0.830218	0.451778	0.843478	0.147614		3.24805	3.72719	0.00726098	4.93241	0.810528	2.22407	21
A107	0.788681	0.390885	0.809452	0.118924		3.17085	3.61263	0.00703782	4.67423	0.785616	2.11795	102
A108	0.778297	0.438863	0.824575	0.125167		3.19836	3.65266	0.00711579	4.76192	0.79432	2.15414	58
A109	0.811526	0.536021	0.893384	0.145087		3.27967	3.78064	0.00736512	5.07367	0.822153	2.28093	14
A110	0.788162	0.447423	0.820794	0.126505		3.20389	3.66085	0.00713175	4.78032	0.796102	2.1617	50
A111	0.764798	0.424072	0.832892	0.14806		3.22372	3.68525	0.00717928	4.81937	0.801407	2.17866	36
A112	1	0.450389	0.82949	0.689312		3.68575	4.42111	0.00861282	6.63753	0.961431	2.91607	4
A113	0.872274	0.472538	0.875992	0.22878		3.36229	3.89443	0.00758678	5.30215	0.846897	2.37639	10
A114	0.801661	1	0.800378	0.140627		3.34289	3.89331	0.00758462	5.38751	0.846655	2.40643	8
A115	0.779855	0.396554	0.810208	0.147168		3.20971	3.66327	0.00713647	4.76604	0.796628	2.15696	55
A116	0.728453	0.405151	0.818904	0.136316		3.19038	3.63443	0.00708028	4.70054	0.790356	2.13006	84
A117	0.816719	0.306078	0.831758	0.167088		3.21211	3.67072	0.00715099	4.79524	0.798249	2.16825	44
A118	0.795431	0.460637	0.847259	0.151182		3.24967	3.72702	0.00726066	4.92392	0.810492	2.22104	23
A119	0.790758	0.435034	0.813989	0.124127		3.19512	3.64779	0.00710631	4.75076	0.793262	2.14956	62
A120	0.781931	0.403274	0.818526	0		2.77498	3.16893	0.00617344	4.13046	0.689128	1.86857	139
A121	0.765317	0.501858	0.80189	0.137208		3.22506	3.68713	0.00718295	4.82328	0.801817	2.18028	35
A122	0.804258	0.222135	0.870699	0.108667		3.10021	3.52759	0.00687214	4.54533	0.767122	2.06141	132
A123	0.798546	0.362653	0.812098	0.211536		3.27553	3.75465	0.00731448	4.95207	0.8165	2.23454	19
A124	0.790758	0.425686	0.821928	0.138546		3.21401	3.67328	0.00715597	4.80014	0.798805	2.17032	42
A125	0.749221	0.327589	0.830246	0.23532		3.28076	3.76075	0.00732636	4.9605	0.817826	2.23831	18
A126	0.808411	0.485002	0.882042	0.187156		3.3118	3.81919	0.00744021	5.13156	0.830535	2.30636	13
A127	0.774663	0.283102	0.822306	0.156682		3.17806	3.61929	0.00705078	4.67639	0.787063	2.11956	100
A128	0.808411	0.463753	0.809452	0.0984094		3.16772	3.61583	0.00704405	4.70633	0.786312	2.12973	85
A129	0.736241	0.360589	0.796219	0.137208		3.17043	3.6033	0.00701964	4.62555	0.783588	2.0995	115
A130	0.761682	0.437925	0.782609	0.139438		3.20199	3.64926	0.00710917	4.72638	0.793581	2.14111	72
A131	0.804258	0.446409	0.820038	0.117735		3.19403	3.64951	0.00710965	4.76519	0.793635	2.1549	57
A132	0.747664	0.338552	0.657845	0.201724		3.19763	3.62252	0.00705709	4.6018	0.787768	2.09353	122
A133	0.747144	0.354169	0.796219	0.131262		3.16221	3.59327	0.00700009	4.60979	0.781405	2.09264	123
A134	0.786085	0.360814	0.815123	0.140181		3.19014	3.63709	0.00708546	4.71612	0.790934	2.13592	80
A135	0.737799	0.43556	0.818147	0.136316		3.2024	3.65275	0.00711597	4.7434	0.794341	2.14759	63
A136	0.814123	0.437399	0.814367	0.107626		3.17634	3.62623	0.0070643	4.72219	0.788573	2.13668	77
A137	0.74974	0.358787	0.795463	0.142114		3.17882	3.61552	0.00704344	4.65235	0.786244	2.11056	109
A138	0.798027	0.437399	0.812098	0.129181		3.20384	3.65979	0.00712969	4.7748	0.795872	2.15962	53
A139	0.750779	0.384278	0.787902	0.139438		3.18285	3.62088	0.00705388	4.66247	0.787409	2.11483	105
A140	0.779335	0.453429	0.798488	0.145384		3.22296	3.68208	0.00717311	4.80577	0.800719	2.17343	41
					Min Pi	1.3932	513.317
					Max Pi	3.77584

## Sheet: 20_06
2021/06	C1	C2	C3	C4
A1	3.8	5.19	0.94	1.35
A2	0.31	5.77	0.72	0.42
A3	0.19	5.11	0.001	3.17
A4	3.85	5.76	-0.25	2.91
A5	0.94	3.54	1.01	1.06
A6	0.18	-0.61	0.42	0.12
A7	0.93	2.81	0.87	1.37
A8	4.4	13.06	1.44	0.45
A9	1.75	13.8	2.33	-0.14
A10	0.95	2.72	1.64	73.46
A11	0.36	3.59	0.32	0.98
A12	0.57	2.74	0.44	2.66
A13	0.3	-2.84	0.95	1.64
A14	0.38	-0.93	0.26	2.12
A15	0.69	-3.65	2.55	1.48
A16	0.51	1.61	0.58	0.46
A17	0.18	-6.2	0.69	1.38
A18	0.34	5.81	0.39	0.44
A19	0.63	-1.48	0.75	0.34
A20	1.89	5.99	8.08	1.75
A21	0.18	-0.43	0.43	1.39
A22	1.5	2.94	0.52	0.57
A23	0.19	-9.69	1.22	0.95
A24	0.36	2.08	1.66	1.2
A25	0.24	-4.98	0.43	8.35
A26	0.7	0.13	1.05	0.54
A27	0.16	-1.19	0.17	1.34
A28	-0.01	-23.44	0.57	2.92
A29	0.33	3.86	0.33	0.8
A30	0.18	-1.69	0.53	4.04
A31	0.57	-4.79	12.47	-9.82
A32	0.48	-2.24	1.08	1.74
A33	0.4	6.22	0.19	1.07
A34	0.3	-41.05	4.22	0.21
A35	3.04	11.72	0.72	3.39
A36	3.41	4.92	0.49	0.59
A37	0.33	3.39	0.32	2.73
A38	0.52	-10.8	1.66	0.8
A39	1	-7.6	1.32	4.05
A40	0.63	-0.39	0.56	0.51
A41	1.01	6.7	1.72	5.11
A42	0.28	-1.15	0.95	0.59
A43	0.19	-6.42	1.05	0.76
A44	1.07	8.99	1.3	1.39
A45	0.75	-3.08	2.98	0.34
A46	0.54	-6.43	1.14	0.97
A47	3.25	-11.5	10.51	6.19
A48	2.35	-4.49	2.03	-17.15
A49	0.46	-7.39	12.96	1.21
A50	-0.03	-11.57	0.29	-0.64
A51	0.48	14.82	0.84	0.37
A52	1.29	10.04	1.48	4.22
A53	1.06	6.9	1.48	0.82
A54	0.37	-0.6	0.98	0.71
A55	0.56	3.56	0.41	1.17
A56	1	-0.26	6.48	8.4
A57	0.25	0.3	0.83	1.74
A58	1.14	6.11	1.17	0.08
A59	0.96	2.97	0.32	0.6
A60	0.18	1.64	0.03	1.28
A61	2.6	0.43	0.9	0.11
A62	30.56	7.37	2.37	-1.31
A63	0.46	-7.93	1.96	0.5
A64	1.77	4.99	1.43	0.88
A65	0.6	6.25	1.7	0.06
A66	1.45	5.95	0.5	0.79
A67	0.72	3.03	0.5	0.74
A68	1.44	2.83	2.53	2.26
A69	0.28	-1.28	0.4	1.76
A70	1.39	-3.01	0.62	0.54
A71	1.27	15.97	7.44	0.84
A72	0.24	0.44	0.15	3.13
A73	-0.17	2.02	1.59	0.08
A74	0.47	-3.14	0.51	3.27
A75	-0.22	1.71	0.1	-2.08
A76	-3.35	-2.63	-0.97	-7.49
A77	0.23	2.31	0.08	0.47
A78	1.31	10.29	0.45	-0.7
A79	0.6	0.79	1.67	0.51
A80	0.61	0.48	2.27	2.41
A81	1.6	6	0.62	-0.42
A82	0.14	-9.85	2.29	4.66
A83	9.77	6.74	17.34	7.72
A84	0.41	2.08	0.87	0.39
A85	0.39	6.83	0.49	0.83
A86	0.94	7.74	0.55	0.09
A87	1.72	0.13	1.4	-3.64
A88	-0.02	0.44	0.21	1.74
A89	0.32	-3.11	0.74	2.02
A90	0.24	-3.11	0.5	1.76
A91	0.22	-3.11	0.45	1.71
A92	1.27	0.79	0.67	1.15
A93	0.14	1.15	0.93	1.68
A94	5.35	3.16	3.18	8.2
A95	0.45	-3.17	0.97	3.65
A96	1.14	-2.11	1.77	4.11
A97	0.35	-76.49	7.22	1.23
A98	0.48	3.21	3.79	0.07
A99	4.05	0.48	2.03	-13.65
A100	0.9	16.97	0.45	1.04
A101	0.17	0.29	0.37	-0.91
A102	0.51	24.11	0.62	0.23
A103	-0.67	2.24	1.77	-4.63
A104	0.05	2.41	-0.04	-0.99
A105	0.21	-1.35	0.79	4.28
A106	-0.37	-6.91	-0.55	-1.15
A107	0.31	2.95	0.49	1.03
A108	0.91	2.59	0.51	1.49
A109	0.22	-45.6	5.31	1.21
A110	0.4	0.16	0.22	0.74
A111	0.98	2.53	1.11	0.16
A112	-2.53	-0.37	-0.18	-18.59
A113	12.96	23.67	9.2	11.11
A114	1.18	-2.4	1.01	1.51
A115	0.33	0.72	0.68	-0.27
A116	0.55	3.17	-0.11	-0.01
A117	0.3	4.53	0.48	-1.16
A118	3.42	5.09	2.02	-0.04
A119	0.27	-1.55	0.28	0.86
A120	1.28	0.38	0.62	11.91
A121	0.79	-1.61	2.87	0.59
A122	0.05	-70.52	2.39	1.91
A123	2.64	-1.94	1.93	6.8
A124	0.68	5.15	0.76	0.65
A125	0.27	8.1	0.26	-4.05
A126	0.34	4.16	0.43	-1.73
A127	0.42	5.22	0.83	0.03
A128	0.4	0.84	0.46	2.56
A129	0.57	7.64	1.3	0.49
A130	1.22	8.23	2.26	0.7
A131	0.15	-1.76	0.39	1.11
A132	0.22	6.4	-0.2	-3.98
A133	0.21	-2.61	0.43	0.17
A134	0.64	10.98	0.11	-0.63
A135	0.99	1.3	1.25	0.26
A136	0.48	-0.24	0.55	2.14
A137	0.88	9.37	0.67	0.14
A138	0.33	8.09	0.33	0.51
A139	0.6	2.62	1.15	0.42
A140	0.71	-2.36	2.2	0.85
MAX	30.56	24.11	17.34	73.46
MIN	-3.35	-76.49	-0.97	-18.59
	1	1	1	1
	Normalization
	C1	C2	C3	C4
A1	0.210852	0.811928	0.104315	0.216621
A2	0.107933	0.817694	0.0922993	0.206518
A3	0.104394	0.811133	0.0530311	0.236393
A4	0.212327	0.817594	0.0393228	0.233569
A5	0.126511	0.795527	0.108138	0.213471
A6	0.104099	0.754274	0.0759148	0.203259
A7	0.126216	0.78827	0.100492	0.216839
A8	0.228546	0.890159	0.131622	0.206844
A9	0.150398	0.897515	0.180229	0.200435
A10	0.126806	0.787376	0.142545	1
A11	0.109407	0.796024	0.0704533	0.212602
A12	0.1156	0.787575	0.0770071	0.230853
A13	0.107638	0.732107	0.104861	0.219772
A14	0.109997	0.751093	0.0671764	0.224986
A15	0.119139	0.724056	0.192245	0.218034
A16	0.113831	0.776342	0.0846532	0.206953
A17	0.104099	0.698708	0.0906608	0.216947
A18	0.108817	0.818091	0.0742764	0.206735
A19	0.11737	0.745626	0.0939377	0.205649
A20	0.154527	0.819881	0.494265	0.220967
A21	0.104099	0.756064	0.076461	0.217056
A22	0.143026	0.789563	0.0813763	0.208148
A23	0.104394	0.664016	0.119607	0.212276
A24	0.109407	0.781014	0.143637	0.214992
A25	0.105868	0.710835	0.076461	0.292667
A26	0.119434	0.76163	0.110322	0.207822
A27	0.103509	0.748509	0.0622611	0.216513
A28	0.098496	0.527336	0.084107	0.233677
A29	0.108523	0.798708	0.0709995	0.210646
A30	0.104099	0.743539	0.0819224	0.245845
A31	0.1156	0.712724	0.734025	0.0952743
A32	0.112946	0.738072	0.111961	0.220858
A33	0.110587	0.822167	0.0633534	0.21358
A34	0.107638	0.352286	0.283452	0.204237
A35	0.18844	0.876839	0.0922993	0.238783
A36	0.199351	0.809245	0.0797378	0.208365
A37	0.108523	0.794036	0.0704533	0.231613
A38	0.114126	0.652982	0.143637	0.210646
A39	0.128281	0.684791	0.125068	0.245953
A40	0.11737	0.756461	0.0835609	0.207496
A41	0.128576	0.826938	0.146914	0.257469
A42	0.107048	0.748907	0.104861	0.208365
A43	0.104394	0.696521	0.110322	0.210212
A44	0.130345	0.849702	0.123976	0.217056
A45	0.120908	0.729722	0.215729	0.205649
A46	0.114715	0.696421	0.115238	0.212493
A47	0.194633	0.646024	0.62698	0.269202
A48	0.168092	0.715706	0.163845	0.0156437
A49	0.112356	0.686879	0.760786	0.2151
A50	0.0979062	0.645328	0.0688149	0.195003
A51	0.112946	0.907654	0.0988531	0.205975
A52	0.136833	0.860139	0.133807	0.2478
A53	0.13005	0.828926	0.133807	0.210864
A54	0.109702	0.754374	0.106499	0.209669
A55	0.115305	0.795726	0.0753687	0.214666
A56	0.128281	0.757753	0.406881	0.29321
A57	0.106163	0.76332	0.0983069	0.220858
A58	0.132409	0.821074	0.116876	0.202825
A59	0.127101	0.789861	0.0704533	0.208474
A60	0.104099	0.77664	0.054615	0.215861
A61	0.175464	0.764612	0.10213	0.20315
A62	1	0.833598	0.182414	0.187724
A63	0.112356	0.681511	0.160022	0.207387
A64	0.150988	0.80994	0.131076	0.211515
A65	0.116485	0.822465	0.145822	0.202607
A66	0.141551	0.819483	0.080284	0.210538
A67	0.120024	0.790457	0.080284	0.209995
A68	0.141256	0.788469	0.191152	0.226507
A69	0.107048	0.747614	0.0748225	0.221076
A70	0.139782	0.730417	0.0868378	0.207822
A71	0.136243	0.919085	0.459312	0.211081
A72	0.105868	0.764712	0.0611688	0.235959
A73	0.0937776	0.780417	0.139814	0.202825
A74	0.112651	0.729125	0.0808301	0.23748
A75	0.0923032	0.777336	0.058438	0.179359
A76	0	0.734195	0	0.120587
A77	0.105574	0.7833	0.0573457	0.207061
A78	0.137423	0.862624	0.0775532	0.194351
A79	0.116485	0.768191	0.144184	0.207496
A80	0.11678	0.765109	0.176952	0.228137
A81	0.145975	0.81998	0.0868378	0.197393
A82	0.102919	0.662425	0.178045	0.25258
A83	0.386907	0.827336	1	0.285823
A84	0.110882	0.781014	0.100492	0.206192
A85	0.110292	0.828231	0.0797378	0.210972
A86	0.126511	0.837276	0.0830147	0.202933
A87	0.149513	0.76163	0.129437	0.162412
A88	0.0982011	0.764712	0.0644457	0.220858
A89	0.108228	0.729423	0.0933916	0.2239
A90	0.105868	0.729423	0.080284	0.221076
A91	0.105279	0.729423	0.0775532	0.220532
A92	0.136243	0.768191	0.0895685	0.214449
A93	0.102919	0.771769	0.103768	0.220206
A94	0.256561	0.79175	0.226652	0.291037
A95	0.112061	0.728827	0.105953	0.241608
A96	0.132409	0.739364	0.149645	0.246605
A97	0.109112	0	0.447297	0.215318
A98	0.112946	0.792247	0.259967	0.202716
A99	0.218225	0.765109	0.163845	0.0536665
A100	0.125332	0.929026	0.0775532	0.213254
A101	0.103804	0.763221	0.0731841	0.19207
A102	0.113831	1	0.0868378	0.204454
A103	0.0790327	0.782604	0.149645	0.151657
A104	0.100265	0.784294	0.0507919	0.1912
A105	0.104984	0.746918	0.0961223	0.248452
A106	0.0878797	0.69165	0.0229383	0.189462
A107	0.107933	0.789662	0.0797378	0.213145
A108	0.125627	0.786083	0.0808301	0.218142
A109	0.105279	0.307058	0.342982	0.2151
A110	0.110587	0.761928	0.0649918	0.209995
A111	0.127691	0.785487	0.113599	0.203694
A112	0.0241817	0.75666	0.0431458	0
A113	0.480979	0.995626	0.555434	0.322651
A114	0.133589	0.736481	0.108138	0.21836
A115	0.108523	0.767495	0.0901147	0.199022
A116	0.11501	0.791849	0.0469689	0.201847
A117	0.107638	0.805368	0.0791917	0.189354
A118	0.199646	0.810934	0.163299	0.201521
A119	0.106753	0.74493	0.0682687	0.211298
A120	0.136538	0.764115	0.0868378	0.331342
A121	0.122088	0.744334	0.209721	0.208365
A122	0.100265	0.0593439	0.183506	0.222705
A123	0.176644	0.741054	0.158383	0.275828
A124	0.118844	0.811531	0.0944839	0.209017
A125	0.106753	0.840855	0.0671764	0.157958
A126	0.108817	0.80169	0.076461	0.183161
A127	0.111177	0.812227	0.0983069	0.202281
A128	0.110587	0.768688	0.0780994	0.229766
A129	0.1156	0.836282	0.123976	0.207279
A130	0.134769	0.842147	0.176406	0.20956
A131	0.103214	0.742843	0.0742764	0.214014
A132	0.105279	0.823956	0.0420535	0.158718
A133	0.104984	0.734394	0.076461	0.203802
A134	0.117664	0.869483	0.0589842	0.195111
A135	0.127986	0.77326	0.121245	0.20478
A136	0.112946	0.757952	0.0830147	0.225204
A137	0.124742	0.853479	0.0895685	0.203476
A138	0.108523	0.840755	0.0709995	0.207496
A139	0.116485	0.786382	0.115784	0.206518
A140	0.119729	0.736879	0.173129	0.21119
	0.163265	0.163265	0.244898	0.428571
	Weighted normalized matrix
	C1	C2	C3	C4		Si	λ
A1	0.0344248	0.132559	0.0255464	0.0928377		0.285368	0.5
A2	0.0176216	0.133501	0.0226039	0.0885077		0.262234
A3	0.0170439	0.13243	0.0129872	0.101311		0.263772
A4	0.0346655	0.133485	0.00963007	0.100101		0.277881
A5	0.0206549	0.129882	0.0264827	0.0914875		0.268507
A6	0.0169957	0.123147	0.0185914	0.087111		0.245845
A7	0.0206067	0.128697	0.0246102	0.0929308		0.266845
A8	0.0373136	0.145332	0.032234	0.0886474		0.303527
A9	0.0245547	0.146533	0.0441378	0.0859004		0.301126
A10	0.020703	0.128551	0.034909	0.428571		0.612734
A11	0.0178624	0.129963	0.0172539	0.091115		0.256194
A12	0.0188735	0.128583	0.0188589	0.0989368		0.265253
A13	0.0175735	0.119528	0.0256802	0.0941878		0.256969
A14	0.0179587	0.122627	0.0164514	0.0964227		0.25346
A15	0.0194512	0.118213	0.0470803	0.0934429		0.278187
A16	0.0185846	0.126749	0.0207314	0.0886939		0.254759
A17	0.0169957	0.114075	0.0222027	0.0929773		0.24625
A18	0.0177661	0.133566	0.0181901	0.0886008		0.258123
A19	0.0191623	0.121735	0.0230052	0.0881352		0.252037
A20	0.0252288	0.133858	0.121045	0.0947		0.374831
A21	0.0169957	0.123439	0.0187251	0.0930239		0.252183
A22	0.0233511	0.128908	0.0199289	0.0892061		0.261394
A23	0.0170439	0.108411	0.0292915	0.0909753		0.245721
A24	0.0178624	0.127512	0.0351765	0.0921393		0.27269
A25	0.0172846	0.116054	0.0187251	0.125429		0.277493
A26	0.0194994	0.124348	0.0270177	0.0890664		0.259931
A27	0.0168994	0.122205	0.0152476	0.0927911		0.247143
A28	0.016081	0.0860955	0.0205976	0.100147		0.222921
A29	0.0177179	0.130401	0.0173876	0.0902769		0.255784
A30	0.0169957	0.121394	0.0200626	0.105362		0.263814
A31	0.0188735	0.116363	0.179761	0.0408318		0.355829
A32	0.0184401	0.120501	0.0274189	0.0946534		0.261014
A33	0.018055	0.134231	0.0155151	0.091534		0.259335
A34	0.0175735	0.057516	0.0694167	0.08753		0.232036
A35	0.0307657	0.143157	0.0226039	0.102336		0.298862
A36	0.0325471	0.132121	0.0195276	0.0892992		0.273495
A37	0.0177179	0.129638	0.0172539	0.0992627		0.263873
A38	0.0186327	0.106609	0.0351765	0.0902769		0.250695
A39	0.0209438	0.111802	0.030629	0.105408		0.268784
A40	0.0191623	0.123504	0.0204639	0.0889267		0.252057
A41	0.0209919	0.13501	0.035979	0.110344		0.302325
A42	0.0174772	0.12227	0.0256802	0.0892992		0.254727
A43	0.0170439	0.113717	0.0270177	0.0900907		0.24787
A44	0.0212808	0.138727	0.0303615	0.0930239		0.283393
A45	0.0197401	0.119138	0.0528316	0.0881352		0.279845
A46	0.018729	0.113701	0.0282215	0.0910684		0.25172
A47	0.0317767	0.105473	0.153546	0.115372		0.406168
A48	0.0274435	0.11685	0.0401253	0.00670442		0.191123
A49	0.0183438	0.112143	0.186315	0.0921858		0.408988
A50	0.0159847	0.105359	0.0168526	0.0835725		0.221769
A51	0.0184401	0.148188	0.0242089	0.0882749		0.279112
A52	0.02234	0.140431	0.032769	0.1062		0.30174
A53	0.0212326	0.135335	0.032769	0.0903701		0.279706
A54	0.0179105	0.123163	0.0260814	0.0898579		0.257013
A55	0.0188253	0.129914	0.0184576	0.0919996		0.259197
A56	0.0209438	0.123715	0.0996445	0.125661		0.369964
A57	0.0173328	0.124623	0.0240752	0.0946534		0.260685
A58	0.0216178	0.134053	0.0286227	0.0869247		0.271218
A59	0.0207512	0.128957	0.0172539	0.0893458		0.256307
A60	0.0169957	0.126798	0.0133751	0.0925117		0.249681
A61	0.0286472	0.124834	0.0250114	0.0870644		0.265557
A62	0.163265	0.136097	0.0446728	0.0804531		0.424488
A63	0.0183438	0.111267	0.039189	0.0888802		0.25768
A64	0.024651	0.132235	0.0321002	0.0906494		0.279636
A65	0.0190179	0.13428	0.0357115	0.0868316		0.275841
A66	0.0231104	0.133793	0.0196614	0.0902304		0.266795
A67	0.0195957	0.129054	0.0196614	0.0899976		0.258309
A68	0.0230622	0.128729	0.0468128	0.0970745		0.295679
A69	0.0174772	0.122059	0.0183239	0.0947465		0.252607
A70	0.0228215	0.119252	0.0212664	0.0890664		0.252406
A71	0.0222437	0.150054	0.112485	0.0904632		0.375246
A72	0.0172846	0.124851	0.0149801	0.101125		0.25824
A73	0.0153106	0.127415	0.0342402	0.0869247		0.26389
A74	0.018392	0.119041	0.0197951	0.101777		0.259005
A75	0.0150699	0.126912	0.0143114	0.0768681		0.233161
A76	0	0.119868	0	0.0516799		0.171548
A77	0.0172365	0.127886	0.0140439	0.0887405		0.247906
A78	0.0224363	0.140836	0.0189926	0.0832932		0.265558
A79	0.0190179	0.125419	0.0353103	0.0889267		0.268674
A80	0.019066	0.124916	0.0433353	0.0977729		0.28509
A81	0.0238325	0.133874	0.0212664	0.0845968		0.26357
A82	0.0168032	0.108151	0.0436028	0.108249		0.276805
A83	0.0631683	0.135075	0.244898	0.122495		0.565637
A84	0.0181031	0.127512	0.0246102	0.088368		0.258594
A85	0.0180068	0.135221	0.0195276	0.0904166		0.263172
A86	0.0206549	0.136698	0.0203301	0.0869713		0.264654
A87	0.0244103	0.124348	0.031699	0.069605		0.250062
A88	0.0160328	0.124851	0.0157826	0.0946534		0.25132
A89	0.0176698	0.119089	0.0228714	0.0959571		0.255588
A90	0.0172846	0.119089	0.0196614	0.0947465		0.250782
A91	0.0171883	0.119089	0.0189926	0.0945138		0.249784
A92	0.0222437	0.125419	0.0219352	0.0919065		0.261504
A93	0.0168032	0.126003	0.0254127	0.0943741		0.262593
A94	0.0418875	0.129265	0.0555066	0.12473		0.351389
A95	0.0182957	0.118992	0.0259477	0.103546		0.266781
A96	0.0216178	0.120712	0.0366478	0.105688		0.284666
A97	0.0178142	0	0.109542	0.0922789		0.219635
A98	0.0184401	0.129346	0.0636655	0.0868782		0.29833
A99	0.0356285	0.124916	0.0401253	0.0229999		0.223669
A100	0.0204623	0.151677	0.0189926	0.0913943		0.282527
A101	0.0169476	0.124607	0.0179226	0.0823154		0.241793
A102	0.0185846	0.163265	0.0212664	0.0876231		0.290739
A103	0.0129033	0.127772	0.0366478	0.0649957		0.242319
A104	0.0163698	0.128048	0.0124388	0.081943		0.238799
A105	0.0171402	0.121946	0.0235402	0.106479		0.269105
A106	0.0143477	0.112922	0.00561754	0.081198		0.214085
A107	0.0176216	0.128924	0.0195276	0.0913478		0.257421
A108	0.0205104	0.12834	0.0197951	0.0934895		0.262135
A109	0.0171883	0.0501318	0.0839956	0.0921858		0.243502
A110	0.018055	0.124396	0.0159164	0.0899976		0.248365
A111	0.0208475	0.128243	0.0278202	0.0872972		0.264207
A112	0.00394802	0.123536	0.0105663	0		0.13805
A113	0.078527	0.162551	0.136025	0.138279		0.515381
A114	0.0218104	0.120242	0.0264827	0.0935826		0.262117
A115	0.0177179	0.125305	0.0220689	0.0852952		0.250387
A116	0.0187772	0.129281	0.0115026	0.0865057		0.246067
A117	0.0175735	0.131488	0.0193939	0.0811515		0.249607
A118	0.0325952	0.132397	0.0399915	0.086366		0.29135
A119	0.0174291	0.121621	0.0167189	0.0905563		0.246325
A120	0.0222919	0.124753	0.0212664	0.142003		0.310315
A121	0.0199327	0.121524	0.0513604	0.0892992		0.282116
A122	0.0163698	0.00968879	0.0449403	0.0954449		0.166444
A123	0.0288398	0.120988	0.0387878	0.118212		0.306828
A124	0.0194031	0.132495	0.0231389	0.0895786		0.264615
A125	0.0174291	0.137282	0.0164514	0.0676961		0.238859
A126	0.0177661	0.130888	0.0187251	0.0784976		0.245877
A127	0.0181513	0.132608	0.0240752	0.0866919		0.261527
A128	0.018055	0.1255	0.0191264	0.0984712		0.261152
A129	0.0188735	0.136536	0.0303615	0.0888336		0.274604
A130	0.022003	0.137493	0.0432016	0.0898113		0.292509
A131	0.0168513	0.12128	0.0181901	0.0917202		0.248042
A132	0.0171883	0.134523	0.0102988	0.068022		0.230032
A133	0.0171402	0.119901	0.0187251	0.0873437		0.24311
A134	0.0192105	0.141956	0.0144451	0.0836191		0.259231
A135	0.0208956	0.126246	0.0296927	0.0877628		0.264597
A136	0.0184401	0.123747	0.0203301	0.0965158		0.259033
A137	0.020366	0.139343	0.0219352	0.0872041		0.268848
A138	0.0177179	0.137266	0.0173876	0.0889267		0.261298
A139	0.0190179	0.128389	0.0283552	0.0885077		0.264269
A140	0.0195475	0.120307	0.0423991	0.0905097		0.272763
					Min Si	0.13805
	Normalized matrix				Max Si	0.612734
	C1	C2	C3	C4		Pi	Si+Pi	kia	kib	kic	ki	rank
A1	0.210852	0.811928	0.104315	0.216621		2.8362	3.12157	0.00736974	4.16073	0.775873	1.9356	25
A2	0.107933	0.817694	0.0922993	0.206518		2.7295	2.99174	0.00706321	3.91439	0.743603	1.82897	73
A3	0.104394	0.811133	0.0530311	0.236393		2.68398	2.94775	0.00695936	3.89192	0.732669	1.81459	84
A4	0.212327	0.817594	0.0393228	0.233569		2.73304	3.01092	0.00710849	4.03034	0.748369	1.87308	44
A5	0.126511	0.795527	0.108138	0.213471		2.77277	3.04128	0.00718017	3.99176	0.755915	1.86373	46
A6	0.104099	0.754274	0.0759148	0.203259		2.68321	2.92906	0.00691523	3.7615	0.728023	1.76536	119
A7	0.126216	0.78827	0.100492	0.216839		2.76421	3.03105	0.00715603	3.9734	0.753374	1.8557	50
A8	0.228546	0.890159	0.131622	0.206844		2.88461	3.18814	0.0075269	4.328	0.792419	2.00486	14
A9	0.150398	0.897515	0.180229	0.200435		2.87591	3.17704	0.00750068	4.30418	0.789658	1.99476	16
A10	0.126806	0.787376	0.142545	1		3.29611	3.90884	0.00922841	6.87156	0.971551	3.0124	1
A11	0.109407	0.796024	0.0704533	0.212602		2.69747	2.95367	0.00697333	3.84699	0.734139	1.79942	101
A12	0.1156	0.787575	0.0770071	0.230853		2.73209	2.99734	0.00707644	3.93816	0.744995	1.83826	62
A13	0.107638	0.732107	0.104861	0.219772		2.74333	3.0003	0.00708343	3.88646	0.745731	1.82024	79
A14	0.109997	0.751093	0.0671764	0.224986		2.69558	2.94904	0.00696241	3.82579	0.73299	1.79119	105
A15	0.119139	0.724056	0.192245	0.218034		2.84358	3.12176	0.00737019	4.11415	0.775921	1.91903	29
A16	0.113831	0.776342	0.0846532	0.206953		2.71617	2.97093	0.00701409	3.8504	0.738431	1.80313	98
A17	0.104099	0.698708	0.0906608	0.216947		2.7093	2.95555	0.00697776	3.78369	0.734607	1.7771	114
A18	0.108817	0.818091	0.0742764	0.206735		2.70183	2.95995	0.00698817	3.86418	0.735702	1.80646	92
A19	0.11737	0.745626	0.0939377	0.205649		2.72611	2.97815	0.00703112	3.83802	0.740224	1.79976	100
A20	0.154527	0.819881	0.494265	0.220967		3.0704	3.44523	0.00813387	4.98165	0.856319	2.27486	7
A21	0.104099	0.756064	0.076461	0.217056		2.69894	2.95112	0.00696732	3.81902	0.733507	1.78907	107
A22	0.143026	0.789563	0.0813763	0.208148		2.74146	3.00285	0.00708946	3.91713	0.746365	1.83155	69
A23	0.104394	0.664016	0.119607	0.212276		2.73598	2.9817	0.00703952	3.79956	0.741109	1.78654	110
A24	0.109407	0.781014	0.143637	0.214992		2.79649	3.06918	0.00724604	4.03957	0.76285	1.88482	38
A25	0.105868	0.710835	0.076461	0.292667		2.76228	3.03977	0.00717661	4.04911	0.75554	1.88396	40
A26	0.119434	0.76163	0.110322	0.207822		2.75622	3.01615	0.00712085	3.91743	0.749671	1.83358	68
A27	0.103509	0.748509	0.0622611	0.216513		2.67003	2.91717	0.00688717	3.76117	0.725069	1.76353	121
A28	0.098496	0.527336	0.084107	0.233677		2.66742	2.89034	0.00682383	3.58379	0.7184	1.6963	132
A29	0.108523	0.798708	0.0709995	0.210646		2.69603	2.95181	0.00696896	3.84295	0.733679	1.79771	102
A30	0.104099	0.743539	0.0819224	0.245845		2.7339	2.99772	0.00707732	3.92908	0.745088	1.83507	67
A31	0.1156	0.712724	0.734025	0.0952743		2.94148	3.29731	0.00778464	4.74884	0.819553	2.17047	11
A32	0.112946	0.738072	0.111961	0.220858		2.76049	3.02151	0.00713349	3.92842	0.751001	1.83828	61
A33	0.110587	0.822167	0.0633534	0.21358		2.69139	2.95073	0.00696639	3.86526	0.733409	1.80551	94
A34	0.107638	0.352286	0.283452	0.204237		2.77892	3.01096	0.00710859	3.73212	0.74838	1.76665	117
A35	0.18844	0.876839	0.0922993	0.238783		2.83947	3.13834	0.00740932	4.26089	0.78004	1.97372	20
A36	0.199351	0.809245	0.0797378	0.208365		2.78343	3.05692	0.00721711	4.03577	0.759804	1.88169	41
A37	0.108523	0.794036	0.0704533	0.231613		2.71541	2.97928	0.00703381	3.91585	0.740507	1.82769	74
A38	0.114126	0.652982	0.143637	0.210646		2.76913	3.01982	0.00712952	3.86005	0.750583	1.81363	86
A39	0.128281	0.684791	0.125068	0.245953		2.80442	3.0732	0.00725555	4.01713	0.763851	1.8774	42
A40	0.11737	0.756461	0.0835609	0.207496		2.71447	2.96653	0.00700369	3.82957	0.737336	1.79506	103
A41	0.128576	0.826938	0.146914	0.257469		2.86911	3.17144	0.00748747	4.30785	0.788267	1.99525	15
A42	0.107048	0.748907	0.104861	0.208365		2.73444	2.98917	0.00705714	3.86365	0.742964	1.81049	88
A43	0.104394	0.696521	0.110322	0.210212		2.72951	2.97738	0.00702932	3.81034	0.740034	1.78977	106
A44	0.130345	0.849702	0.123976	0.217056		2.81011	3.09351	0.00730347	4.12716	0.768897	1.91957	28
A45	0.120908	0.729722	0.215729	0.205649		2.85272	3.13256	0.00739569	4.13291	0.778605	1.92728	27
A46	0.114715	0.696421	0.115238	0.212493		2.74885	3.00057	0.00708406	3.85251	0.745797	1.80816	91
A47	0.194633	0.646024	0.62698	0.269202		3.15846	3.56463	0.00841576	5.27365	0.885996	2.39607	5
A48	0.168092	0.715706	0.163845	0.0156437		2.50471	2.69583	0.0063646	3.23334	0.670054	1.54305	136
A49	0.112356	0.686879	0.760786	0.2151		3.09319	3.50217	0.0082683	5.24589	0.870472	2.37702	6
A50	0.0979062	0.645328	0.0688149	0.195003		2.63077	2.85254	0.00673459	3.54839	0.709005	1.67822	134
A51	0.112946	0.907654	0.0988531	0.205975		2.76019	3.0393	0.0071755	4.0593	0.755424	1.88752	37
A52	0.136833	0.860139	0.133807	0.2478		2.85943	3.16117	0.00746322	4.29646	0.785715	1.9897	18
A53	0.13005	0.828926	0.133807	0.210864		2.81083	3.09053	0.00729646	4.10098	0.768158	1.90981	33
A54	0.109702	0.754374	0.106499	0.209669		2.74191	2.99893	0.00708018	3.88573	0.745389	1.81978	80
A55	0.115305	0.795726	0.0753687	0.214666		2.71425	2.97344	0.00702002	3.88112	0.739055	1.81445	85
A56	0.128281	0.757753	0.406881	0.29321		3.06429	3.43425	0.00810795	4.94189	0.853591	2.25913	9
A57	0.106163	0.76332	0.0983069	0.220858		2.74035	3.00104	0.00708516	3.91117	0.745913	1.82916	72
A58	0.132409	0.821074	0.116876	0.202825		2.78304	3.05425	0.00721081	4.01898	0.759141	1.87531	43
A59	0.127101	0.789861	0.0704533	0.208474		2.7092	2.96551	0.00700129	3.85647	0.737084	1.80451	95
A60	0.104099	0.77664	0.054615	0.215861		2.65976	2.90944	0.00686892	3.77197	0.723148	1.76626	118
A61	0.175464	0.764612	0.10213	0.20315		2.78679	3.05235	0.00720632	3.98075	0.758668	1.86141	47
A62	1	0.833598	0.182414	0.187724		3.11821	3.5427	0.00836398	5.37664	0.880544	2.42936	4
A63	0.112356	0.681511	0.160022	0.207387		2.78713	3.04481	0.0071885	3.92393	0.756793	1.84004	59
A64	0.150988	0.80994	0.131076	0.211515		2.82245	3.10209	0.00732373	4.10905	0.771029	1.91436	31
A65	0.116485	0.822465	0.145822	0.202607		2.80111	3.07695	0.00726439	4.06581	0.764782	1.8953	35
A66	0.141551	0.819483	0.080284	0.210538		2.74681	3.0136	0.00711483	3.9602	0.749036	1.84847	55
A67	0.120024	0.790457	0.080284	0.209995		2.72124	2.97955	0.00703444	3.87985	0.740573	1.81489	82
A68	0.141256	0.788469	0.191152	0.226507		2.88443	3.18011	0.00750795	4.27102	0.790423	1.98339	19
A69	0.107048	0.747614	0.0748225	0.221076		2.70163	2.95424	0.00697467	3.82407	0.734281	1.79133	104
A70	0.139782	0.730417	0.0868378	0.207822		2.73492	2.98732	0.00705279	3.84719	0.742505	1.80435	96
A71	0.136243	0.919085	0.459312	0.211081		3.04847	3.42372	0.00808307	4.96847	0.850972	2.26702	8
A72	0.105868	0.764712	0.0611688	0.235959		2.69321	2.95145	0.00696811	3.85867	0.73359	1.80327	97
A73	0.0937776	0.780417	0.139814	0.202825		2.76219	3.02608	0.0071443	3.95052	0.752139	1.84682	56
A74	0.112651	0.729125	0.0808301	0.23748		2.72998	2.98898	0.00705671	3.89134	0.742918	1.82035	78
A75	0.0923032	0.777336	0.058438	0.179359		2.6151	2.84826	0.00672448	3.61934	0.707941	1.70295	130
A76	0	0.734195	0	0.120587		1.3547	1.52625	0.00360334	2.24265	0.379353	1.02047	140
A77	0.105574	0.7833	0.0573457	0.207061		2.65942	2.90733	0.00686394	3.75887	0.722623	1.76128	123
A78	0.137423	0.862624	0.0775532	0.194351		2.72961	2.99517	0.00707131	3.93855	0.744455	1.83808	63
A79	0.116485	0.768191	0.144184	0.207496		2.79383	3.0625	0.00723028	4.00852	0.761191	1.87278	45
A80	0.11678	0.765109	0.176952	0.228137		2.84664	3.13173	0.00739372	4.16641	0.778398	1.9391	23
A81	0.145975	0.81998	0.0868378	0.197393		2.74705	3.01062	0.00710778	3.93701	0.748295	1.83977	60
A82	0.102919	0.662425	0.178045	0.25258		2.83466	3.11146	0.00734587	4.09756	0.77336	1.91162	32
A83	0.386907	0.827336	1	0.285823		3.41057	3.97621	0.00938745	6.6149	0.988294	2.93197	2
A84	0.110882	0.781014	0.100492	0.206192		2.73674	2.99534	0.00707171	3.89336	0.744497	1.82199	77
A85	0.110292	0.828231	0.0797378	0.210972		2.71903	2.9822	0.00704069	3.91345	0.741231	1.82725	75
A86	0.126511	0.837276	0.0830147	0.202933		2.73341	2.99807	0.00707815	3.9348	0.745175	1.83716	64
A87	0.149513	0.76163	0.129437	0.162412		2.75475	3.00481	0.00709407	3.84485	0.746851	1.80604	93
A88	0.0982011	0.764712	0.0644457	0.220858		2.6762	2.92752	0.00691159	3.79598	0.72764	1.77744	113
A89	0.108228	0.729423	0.0933916	0.2239		2.73147	2.98706	0.00705216	3.86769	0.742439	1.81163	87
A90	0.105868	0.729423	0.080284	0.221076		2.70577	2.95655	0.00698014	3.81391	0.734856	1.78803	109
A91	0.105279	0.729423	0.0775532	0.220532		2.70004	2.94982	0.00696425	3.80245	0.733183	1.78297	111
A92	0.136243	0.768191	0.0895685	0.214449		2.75083	3.01233	0.00711184	3.92484	0.748722	1.83567	66
A93	0.102919	0.771769	0.103768	0.220206		2.74546	3.00805	0.00710172	3.92876	0.747657	1.83645	65
A94	0.256561	0.79175	0.226652	0.291037		3.04786	3.39925	0.0080253	4.7952	0.84489	2.20188	10
A95	0.112061	0.728827	0.105953	0.241608		2.77033	3.03711	0.00717033	3.97746	0.75488	1.85803	49
A96	0.132409	0.739364	0.149645	0.246605		2.84759	3.13225	0.00739496	4.16404	0.778528	1.93833	24
A97	0.109112	0	0.447297	0.215318		2.03548	2.25512	0.00532412	3.09351	0.560514	1.42956	138
A98	0.112946	0.792247	0.259967	0.202716		2.88671	3.18504	0.00751957	4.2919	0.791647	1.99155	17
A99	0.218225	0.765109	0.163845	0.0536665		2.66479	2.88846	0.00681937	3.58726	0.717931	1.69727	131
A100	0.125332	0.929026	0.0775532	0.213254		2.75082	3.03334	0.00716144	4.07711	0.753943	1.893	36
A101	0.103804	0.763221	0.0731841	0.19207		2.66787	2.90966	0.00686944	3.72082	0.723202	1.74804	127
A102	0.113831	1	0.0868378	0.204454		2.75744	3.04818	0.00719646	4.14149	0.757631	1.91809	30
A103	0.0790327	0.782604	0.149645	0.151657		2.69516	2.93748	0.0069351	3.74477	0.730115	1.7606	124
A104	0.100265	0.784294	0.0507919	0.1912		2.62217	2.86097	0.00675449	3.66541	0.711101	1.72123	129
A105	0.104984	0.746918	0.0961223	0.248452		2.75968	3.02878	0.00715068	3.98644	0.75281	1.86002	48
A106	0.0878797	0.69165	0.0229383	0.189462		2.50083	2.71492	0.00640967	3.39681	0.674798	1.60426	135
A107	0.107933	0.789662	0.0797378	0.213145		2.71131	2.96873	0.00700889	3.86609	0.737883	1.80841	89
A108	0.125627	0.786083	0.0808301	0.218142		2.73498	2.99712	0.00707591	3.91771	0.74494	1.83093	70
A109	0.105279	0.307058	0.342982	0.2151		2.80417	3.04767	0.00719527	3.83381	0.757505	1.80827	90
A110	0.110587	0.761928	0.0649918	0.209995		2.6789	2.92726	0.00691099	3.77657	0.727577	1.77048	116
A111	0.127691	0.785487	0.113599	0.203694		2.76863	3.03284	0.00716025	3.95757	0.753819	1.85031	53
A112	0.0241817	0.75666	0.0431458	0		1.96322	2.10127	0.00496091	2.44919	0.522276	1.17728	139
A113	0.480979	0.995626	0.555434	0.322651		3.36836	3.88374	0.00916915	6.2197	0.965312	2.77847	3
A114	0.133589	0.736481	0.108138	0.21836		2.77212	3.03423	0.00716354	3.945	0.754165	1.84603	57
A115	0.108523	0.767495	0.0901147	0.199022		2.70891	2.95929	0.00698661	3.81337	0.735538	1.78824	108
A116	0.11501	0.791849	0.0469689	0.201847		2.64165	2.88772	0.00681764	3.73243	0.717749	1.74901	126
A117	0.107638	0.805368	0.0791917	0.189354		2.68769	2.9373	0.00693468	3.79206	0.730071	1.77745	112
A118	0.199646	0.810934	0.163299	0.201521		2.87999	3.17134	0.00748723	4.23638	0.788242	1.96978	21
A119	0.106753	0.74493	0.0682687	0.211298		2.67894	2.92526	0.00690627	3.76182	0.727079	1.76492	120
A120	0.136538	0.764115	0.0868378	0.331342		2.85203	3.16234	0.007466	4.35312	0.786007	2.01004	13
A121	0.122088	0.744334	0.209721	0.208365		2.85505	3.13717	0.00740655	4.15108	0.779749	1.93442	26
A122	0.100265	0.0593439	0.183506	0.222705		2.50307	2.66951	0.00630247	3.05336	0.663513	1.47479	137
A123	0.176644	0.741054	0.158383	0.275828		2.91835	3.22518	0.00761435	4.37682	0.801625	2.02763	12
A124	0.118844	0.811531	0.0944839	0.209017		2.74516	3.00978	0.0071058	3.94319	0.748086	1.84185	58
A125	0.106753	0.840855	0.0671764	0.157958		2.63571	2.87457	0.00678659	3.67583	0.71448	1.72691	128
A126	0.108817	0.80169	0.076461	0.183161		2.67667	2.92255	0.00689987	3.7569	0.726406	1.76278	122
A127	0.111177	0.812227	0.0983069	0.202281		2.736	2.99753	0.00707688	3.91406	0.745041	1.82969	71
A128	0.110587	0.768688	0.0780994	0.229766		2.72398	2.98513	0.00704762	3.90248	0.741961	1.82376	76
A129	0.1156	0.836282	0.123976	0.207279		2.78351	3.05811	0.00721991	4.04386	0.760099	1.88474	39
A130	0.134769	0.842147	0.176406	0.20956		2.85895	3.15146	0.0074403	4.22924	0.783301	1.96435	22
A131	0.103214	0.742843	0.0742764	0.214014		2.68832	2.93637	0.00693248	3.78119	0.72984	1.77344	115
A132	0.105279	0.823956	0.0420535	0.158718		2.57592	2.80595	0.00662459	3.56776	0.697425	1.67843	133
A133	0.104984	0.734394	0.076461	0.203802		2.68152	2.92463	0.00690479	3.74044	0.726924	1.7572	125
A134	0.117664	0.869483	0.0589842	0.195111		2.67894	2.93817	0.00693675	3.85531	0.730289	1.80015	99
A135	0.127986	0.77326	0.121245	0.20478		2.77704	3.04164	0.00718102	3.9666	0.756005	1.85481	51
A136	0.112946	0.757952	0.0830147	0.225204		2.7277	2.98674	0.0070514	3.88987	0.742359	1.8195	81
A137	0.124742	0.853479	0.0895685	0.203476		2.74561	3.01446	0.00711685	3.97419	0.749249	1.85358	52
A138	0.108523	0.840755	0.0709995	0.207496		2.70084	2.96214	0.00699332	3.88645	0.736245	1.81472	83
A139	0.116485	0.786382	0.115784	0.206518		2.76391	3.02818	0.00714926	3.95453	0.752661	1.84856	54
A140	0.119729	0.736879	0.173129	0.21119		2.82289	3.09566	0.00730855	4.05959	0.769431	1.89579	34
					Min Pi	1.3547	423.566
					Max Pi	3.41057

## Sheet: 20_09
2021/06	C1	C2	C3	C4
A1	11.49	3.93	2.7	3.03
A2	0.3	0.03	0.97	0.05
A3	0.24	7.5	0.07	0.89
A4	1.49	2.09	0.71	-0.7
A5	0.46	5.71	-0.15	-0.5
A6	0.34	8.15	-0.2	-0.15
A7	1.86	6.16	1.54	0.77
A8	0.73	10.59	0.14	-0.35
A9	0.12	12.03	-0.47	-1.37
A10	2.39	21.37	0.52	-28.61
A11	0.17	7.23	0.07	0.39
A12	0.73	7.81	0.18	1
A13	0.12	-0.81	0.17	-0.27
A14	0.49	-0.47	0.44	1.45
A15	0.69	-10.23	4.54	1.35
A16	0.44	4.18	-0.13	-0.03
A17	-0.05	-24.07	0.38	0.13
A18	0.65	1.51	0.83	0.34
A19	0.28	-5.19	0.02	-0.12
A20	17.39	13.9	20.21	6.82
A21	2.22	6.78	0.03	-0.55
A22	-1.26	6.05	-0.19	-0.74
A23	0.25	-1.41	0.49	0.15
A24	0.31	15.23	-0.83	-0.27
A25	0.81	4.81	0.68	4.52
A26	0.76	17.68	0.66	0.06
A27	0.11	-2.08	0.1	0.35
A28	-0.18	-88	0.9	1.01
A29	0.62	9.46	0.5	0.51
A30	1.16	10.36	1.34	2.39
A31	6.44	22.27	35.19	-26.85
A32	0.59	-15.25	1.53	1.65
A33	0.39	9.61	-0.22	-0.01
A34	0.31	-21.55	2.68	-0.31
A35	0.52	6.68	0.11	-0.35
A36	-0.21	8.36	1.06	0.82
A37	0.29	6.77	0.37	0.98
A38	0.66	-18.17	4.06	0.45
A39	0.89	-1.85	1.15	0.34
A40	0.54	6.37	0.82	0.49
A41	1.29	7.39	1.71	1.8
A42	0.22	-2.12	0.4	-0.1
A43	0.62	5.43	0.62	-0.22
A44	0.35	10.41	-0.48	-0.97
A45	1.51	12.61	4.41	0.36
A46	0.38	7.71	0.49	0.3
A47	2.34	4.8	5.54	-0.19
A48	2.06	0.14	1.56	-11.8
A49	0.11	9.33	-6.53	-0.91
A50	0.22	-23.81	3.39	0.29
A51	0.63	14.24	0.57	0.08
A52	0.59	13.31	-0.07	-2.27
A53	1.58	9.73	1.44	0.42
A54	0.45	5.52	1.15	0.17
A55	0.68	7.6	0.21	0.18
A56	-0.09	-46.62	1.37	-4.92
A57	0.06	-5.06	0.59	0.42
A58	0.35	12.03	-0.1	-0.55
A59	1.11	4.81	0.39	0.23
A60	0.23	1.25	0.001	0.29
A61	1.12	0.51	0.89	0.48
A62	19.24	11.6	19.83	16.23
A63	0.4	13.42	0.51	-0.5
A64	2.61	4.6	3.71	1.63
A65	0.62	25.59	0.43	-0.39
A66	0.25	9.99	0.68	0.57
A67	0.71	11.25	0.03	-0.16
A68	0.2	0.4	0.35	-0.76
A69	0.19	-1.17	0.39	0.47
A70	0.38	10.06	-0.16	-0.24
A71	0.41	12.55	2.72	-0.53
A72	0.32	0.77	0.23	1.19
A73	-0.24	6.4	-1.06	-2.43
A74	0.84	-0.92	0.84	1.93
A75	2.04	1.44	-0.16	-1.15
A76	7.01	-2.16	3.66	8.63
A77	-0.02	1.4	-0.14	-0.21
A78	5.01	12.39	4.26	2.58
A79	0.87	3.18	2.42	0.2
A80	0.21	1.41	0.2	-1.15
A81	4.23	7.8	1.15	0.44
A82	-0.08	-16.43	-2.57	0.21
A83	87.19	0.73	68.3	56.47
A84	0.41	7.46	0.71	0.2
A85	0.14	0.65	-0.2	-0.09
A86	0.57	0.7	1.79	1.05
A87	7.99	6.45	3.71	2.5
A88	0.24	0.35	-0.18	-0.36
A89	0.31	-3.99	0.65	0.51
A90	0.17	-3.99	0.21	0.32
A91	0.14	-3.99	0.09	0.25
A92	0.08	1.26	0.04	-0.34
A93	0.36	10	0.76	0.56
A94	-1.47	1.93	-0.68	-3.44
A95	0.74	-3.72	1.76	1.93
A96	0.35	2.39	-0.05	-3.48
A97	0.12	-23.55	36.24	-0.03
A98	3.81	6.6	31.39	6.96
A99	14.88	-1.3	8.5	26.5
A100	1.06	6.13	0.35	0.24
A101	1.61	-1.29	2.99	0.8
A102	0.08	15.06	-1.49	-0.72
A103	0.87	7.61	0.14	-1.93
A104	1.02	4.61	1.05	0.76
A105	0.09	4.3	-0.09	0.06
A106	3.14	7.41	2.27	3.89
A107	0.09	5.87	-0.12	0.06
A108	0.51	2.99	0.39	0.28
A109	0.36	10.64	2.66	0.001
A110	0.28	0.51	0.09	0.19
A111	1.05	3.08	2.57	0.51
A112	-6.34	0.65	0.02	-19.97
A113	1.04	7.9	2.46	-2.31
A114	0.53	1.74	0.99	-0.16
A115	0.49	-0.4	1.4	0.29
A116	0.76	13.31	1.26	0.28
A117	0.12	-9.34	2.27	1
A118	-1.21	-0.44	2.85	0.11
A119	0.41	-0.4	0.76	0.63
A120	4.6	0.48	1.53	9.02
A121	0.37	2.95	-0.23	-0.24
A122	0.21	109.51	-2.93	0.32
A123	3.81	-0.14	3.93	6.19
A124	-0.03	1.87	0.27	-0.07
A125	1.08	15.84	-0.09	-1.41
A126	0.37	3.52	-0.47	-0.83
A127	0.22	9.12	0.33	-0.59
A128	0.38	1.2	0.21	0.53
A129	0.11	14.35	-0.27	-0.48
A130	0.47	15.83	0.13	-0.21
A131	0.26	2.63	0.65	0.84
A132	-0.63	12.2	-0.45	-1.45
A133	0.32	-5.24	-0.15	-0.01
A134	0.1	6.21	-0.21	-0.15
A135	0.27	3.88	-0.06	-0.02
A136	0.27	1.3	0.03	0.28
A137	0.2	13.69	0.001	-0.25
A138	0.23	6.7	-0.05	0.02
A139	0.44	13.67	-0.28	-0.46
A140	0.27	7.16	-0.81	-0.73
MAX	87.19	109.51	68.3	56.47
MIN	-6.34	-88	-6.53	-28.61
	1	1	1	1
	Normalization
	C1	C2	C3	C4
A1	0.190634	0.465445	0.123346	0.371885
A2	0.0709933	0.445699	0.100227	0.336859
A3	0.0703518	0.48352	0.0881999	0.346732
A4	0.0837165	0.456129	0.0967526	0.328044
A5	0.0727039	0.474457	0.0852599	0.330395
A6	0.0714209	0.486811	0.0845917	0.334509
A7	0.0876724	0.476735	0.107844	0.345322
A8	0.0755907	0.499165	0.0891354	0.332158
A9	0.0690687	0.506455	0.0809836	0.320169
A10	0.093339	0.553744	0.0942136	0
A11	0.0696033	0.482153	0.0881999	0.340856
A12	0.0755907	0.485089	0.0896699	0.348025
A13	0.0690687	0.441446	0.0895363	0.333098
A14	0.0730247	0.443167	0.0931445	0.353315
A15	0.075163	0.393752	0.147935	0.352139
A16	0.0724901	0.466711	0.0855272	0.335919
A17	0.0672511	0.32368	0.0923426	0.3378
A18	0.0747354	0.453192	0.0983563	0.340268
A19	0.0707794	0.41927	0.0875317	0.334861
A20	0.253715	0.515923	0.357343	0.416432
A21	0.0915214	0.479874	0.0876654	0.329807
A22	0.0543141	0.476178	0.0847254	0.327574
A23	0.0704587	0.438408	0.0938126	0.338035
A24	0.0711002	0.522657	0.0761727	0.333098
A25	0.0764461	0.4699	0.0963517	0.389398
A26	0.0759115	0.535062	0.0960845	0.336977
A27	0.0689618	0.435016	0.0886008	0.340386
A28	0.0658612	0	0.0992917	0.348143
A29	0.0744146	0.493443	0.0939463	0.342266
A30	0.0801882	0.498	0.105172	0.364363
A31	0.136641	0.558301	0.55753	0.0206864
A32	0.0740939	0.368336	0.107711	0.355665
A33	0.0719555	0.494203	0.0843245	0.336154
A34	0.0711002	0.336439	0.123079	0.332628
A35	0.0733455	0.479368	0.0887345	0.332158
A36	0.0655405	0.487874	0.10143	0.34591
A37	0.0708863	0.479824	0.092209	0.34779
A38	0.0748423	0.353552	0.141521	0.341561
A39	0.0773014	0.43618	0.102633	0.340268
A40	0.0735593	0.477799	0.0982226	0.342031
A41	0.0815781	0.482963	0.110116	0.357428
A42	0.0701379	0.434813	0.0926099	0.335096
A43	0.0744146	0.473039	0.0955499	0.333686
A44	0.0715279	0.498253	0.0808499	0.324871
A45	0.0839303	0.509392	0.146198	0.340503
A46	0.0718486	0.484583	0.0938126	0.339798
A47	0.0928044	0.46985	0.161299	0.334039
A48	0.0898108	0.446256	0.108112	0.197579
A49	0.0689618	0.492785	0	0.325576
A50	0.0701379	0.324996	0.132567	0.33968
A51	0.0745215	0.517645	0.0948817	0.337212
A52	0.0740939	0.512936	0.086329	0.309591
A53	0.0846787	0.49481	0.106508	0.341208
A54	0.072597	0.473495	0.102633	0.33827
A55	0.0750561	0.484026	0.0900708	0.338387
A56	0.0668235	0.209508	0.105573	0.278444
A57	0.0684272	0.419928	0.095149	0.341208
A58	0.0715279	0.506455	0.0859281	0.329807
A59	0.0796536	0.4699	0.0924763	0.338975
A60	0.0702448	0.451876	0.0872778	0.33968
A61	0.0797605	0.448129	0.0991581	0.341913
A62	0.273495	0.504278	0.352265	0.527033
A63	0.0720624	0.513493	0.0940799	0.330395
A64	0.0956912	0.468837	0.136844	0.35543
A65	0.0744146	0.57511	0.0930108	0.331688
A66	0.0704587	0.496127	0.0963517	0.342971
A67	0.0753769	0.502506	0.0876654	0.334391
A68	0.0699241	0.447572	0.0919417	0.327339
A69	0.0698172	0.439623	0.0924763	0.341796
A70	0.0718486	0.496481	0.0851263	0.333451
A71	0.0721694	0.509088	0.123614	0.330042
A72	0.0712071	0.449446	0.0903381	0.350259
A73	0.0652197	0.47795	0.073099	0.30771
A74	0.0767668	0.440889	0.0984899	0.358956
A75	0.0895969	0.452838	0.0851263	0.322755
A76	0.142735	0.434611	0.136175	0.437706
A77	0.0675719	0.452635	0.0853936	0.333803
A78	0.121351	0.508278	0.144194	0.366596
A79	0.0770876	0.461648	0.119604	0.338622
A80	0.070031	0.452686	0.0899372	0.322755
A81	0.113012	0.485039	0.102633	0.341443
A82	0.0669304	0.362361	0.05292	0.33874
A83	1	0.449243	1	1
A84	0.0721694	0.483317	0.0967526	0.338622
A85	0.0692826	0.448838	0.0845917	0.335214
A86	0.07388	0.449091	0.111185	0.348613
A87	0.153213	0.478204	0.136844	0.365656
A88	0.0703518	0.447319	0.084859	0.33204
A89	0.0711002	0.425346	0.0959508	0.342266
A90	0.0696033	0.425346	0.0900708	0.340033
A91	0.0692826	0.425346	0.0884672	0.33921
A92	0.0686411	0.451926	0.087799	0.332276
A93	0.0716348	0.496177	0.0974208	0.342854
A94	0.0520689	0.455319	0.0781772	0.295839
A95	0.0756976	0.426713	0.110784	0.358956
A96	0.0715279	0.457648	0.0865963	0.295369
A97	0.0690687	0.326313	0.571562	0.335919
A98	0.108521	0.478963	0.506749	0.418077
A99	0.226879	0.438965	0.200855	0.647743
A100	0.079119	0.476583	0.0919417	0.339093
A101	0.0849995	0.439016	0.127222	0.345675
A102	0.0686411	0.521796	0.0673527	0.327809
A103	0.0770876	0.484077	0.0891354	0.313587
A104	0.0786913	0.468888	0.101296	0.345205
A105	0.068748	0.467318	0.0860617	0.336977
A106	0.101358	0.483064	0.1176	0.381993
A107	0.068748	0.475267	0.0856608	0.336977
A108	0.0732385	0.460686	0.0924763	0.339563
A109	0.0716348	0.499418	0.122812	0.336283
A110	0.0707794	0.448129	0.0884672	0.338505
A111	0.0790121	0.461141	0.121609	0.342266
A112	0	0.448838	0.0875317	0.101551
A113	0.0789052	0.485545	0.120139	0.309121
A114	0.0734524	0.454357	0.100494	0.334391
A115	0.0730247	0.443522	0.105974	0.33968
A116	0.0759115	0.512936	0.104103	0.339563
A117	0.0690687	0.398258	0.1176	0.348025
A118	0.0548487	0.443319	0.125351	0.337565
A119	0.0721694	0.443522	0.0974208	0.343677
A120	0.116968	0.447977	0.107711	0.44229
A121	0.0717417	0.460483	0.0841908	0.333451
A122	0.070031	1	0.048109	0.340033
A123	0.108521	0.444838	0.139784	0.409027
A124	0.067465	0.455015	0.0908726	0.335449
A125	0.0793328	0.525746	0.0860617	0.319699
A126	0.0717417	0.463369	0.0809836	0.326516
A127	0.0701379	0.491722	0.0916745	0.329337
A128	0.0718486	0.451623	0.0900708	0.342501
A129	0.0689618	0.518202	0.0836563	0.33063
A130	0.0728109	0.525695	0.0890017	0.333803
A131	0.0705656	0.458863	0.0959508	0.346145
A132	0.0610499	0.507316	0.0812508	0.319229
A133	0.0712071	0.419017	0.0852599	0.336154
A134	0.0688549	0.476989	0.0844581	0.334509
A135	0.0706725	0.465192	0.0864626	0.336037
A136	0.0706725	0.452129	0.0876654	0.339563
A137	0.0699241	0.51486	0.0872778	0.333333
A138	0.0702448	0.479469	0.0865963	0.336507
A139	0.0724901	0.514759	0.0835227	0.330865
A140	0.0706725	0.481798	0.0764399	0.327692
	0.163265	0.163265	0.244898	0.428571
	Weighted normalized matrix
	C1	C2	C3	C4		Si	λ
A1	0.0311239	0.0759908	0.0302073	0.159379		0.296701	0.5
A2	0.0115907	0.072767	0.0245454	0.144368		0.253271
A3	0.011486	0.0789419	0.0216	0.148599		0.260627
A4	0.013668	0.0744699	0.0236945	0.14059		0.252423
A5	0.01187	0.0774622	0.02088	0.141598		0.25181
A6	0.0116605	0.0794792	0.0207163	0.143361		0.255217
A7	0.0143138	0.0778342	0.0264109	0.147995		0.266554
A8	0.0123413	0.0814961	0.0218291	0.142353		0.25802
A9	0.0112765	0.0826864	0.0198327	0.137215		0.251011
A10	0.015239	0.090407	0.0230727	0		0.128719
A11	0.0113638	0.0787187	0.0216	0.146081		0.257763
A12	0.0123413	0.0791981	0.02196	0.149154		0.262653
A13	0.0112765	0.0720727	0.0219273	0.142756		0.248033
A14	0.0119224	0.0723537	0.0228109	0.15142		0.258507
A15	0.0122715	0.064286	0.0362291	0.150917		0.263703
A16	0.0118351	0.0761975	0.0209454	0.143965		0.252943
A17	0.0109798	0.0528456	0.0226145	0.144771		0.231211
A18	0.0122017	0.0739904	0.0240873	0.145829		0.256108
A19	0.0115558	0.0684521	0.0214363	0.143512		0.244956
A20	0.0414228	0.0842322	0.0875127	0.178471		0.391638
A21	0.0149422	0.0783467	0.0214691	0.141346		0.256104
A22	0.0088676	0.0777433	0.0207491	0.140389		0.247749
A23	0.0115034	0.0715767	0.0229745	0.144872		0.250927
A24	0.0116082	0.0853316	0.0186545	0.142756		0.258351
A25	0.012481	0.0767183	0.0235963	0.166885		0.27968
A26	0.0123937	0.0873568	0.0235309	0.144419		0.2677
A27	0.0112591	0.0710229	0.0216982	0.145879		0.249859
A28	0.0107528	0	0.0243163	0.149204		0.184273
A29	0.0121493	0.080562	0.0230073	0.146685		0.262404
A30	0.0130919	0.081306	0.0257563	0.156155		0.27631
A31	0.0223086	0.091151	0.136538	0.0088656		0.258863
A32	0.0120969	0.0601363	0.0263782	0.152428		0.251039
A33	0.0117478	0.080686	0.0206509	0.144066		0.257151
A34	0.0116082	0.0549287	0.0301418	0.142555		0.239233
A35	0.0119747	0.078264	0.0217309	0.142353		0.254323
A36	0.0107005	0.0796528	0.02484	0.148247		0.26344
A37	0.0115733	0.0783384	0.0225818	0.149053		0.261546
A38	0.0122191	0.0577226	0.0346582	0.146383		0.250983
A39	0.0126206	0.071213	0.0251345	0.145829		0.254797
A40	0.0120097	0.0780078	0.0240545	0.146585		0.260657
A41	0.0133188	0.0788509	0.0269673	0.153183		0.27232
A42	0.0114511	0.0709898	0.02268	0.143613		0.248733
A43	0.0121493	0.0772308	0.0234	0.143008		0.255788
A44	0.011678	0.0813473	0.0198	0.13923		0.252055
A45	0.0137029	0.0831659	0.0358036	0.14593		0.278602
A46	0.0117304	0.0791155	0.0229745	0.145627		0.259448
A47	0.0151517	0.07671	0.0395018	0.143159		0.274523
A48	0.014663	0.072858	0.0264763	0.0846765		0.198674
A49	0.0112591	0.0804546	0	0.139532		0.231246
A50	0.0114511	0.0530605	0.0324654	0.145577		0.242554
A51	0.0121668	0.0845133	0.0232363	0.144519		0.264436
A52	0.0120969	0.0837445	0.0211418	0.132682		0.249665
A53	0.0138251	0.0807852	0.0260836	0.146232		0.266926
A54	0.0118526	0.0773052	0.0251345	0.144973		0.259265
A55	0.012254	0.0790245	0.0220582	0.145023		0.25836
A56	0.0109099	0.0342054	0.0258545	0.119333		0.190303
A57	0.0111718	0.0685596	0.0233018	0.146232		0.249265
A58	0.011678	0.0826864	0.0210436	0.141346		0.256754
A59	0.0130046	0.0767183	0.0226473	0.145275		0.257645
A60	0.0114685	0.0737755	0.0213742	0.145577		0.252195
A61	0.0130221	0.0731638	0.0242836	0.146534		0.257004
A62	0.0446522	0.082331	0.086269	0.225871		0.439123
A63	0.0117653	0.0838354	0.02304	0.141598		0.260238
A64	0.015623	0.0765447	0.0335127	0.152327		0.278007
A65	0.0121493	0.0938954	0.0227782	0.142152		0.270975
A66	0.0115034	0.0810001	0.0235963	0.146988		0.263087
A67	0.0123064	0.0820417	0.0214691	0.14331		0.259128
A68	0.0114162	0.0730729	0.0225163	0.140288		0.247293
A69	0.0113987	0.0717751	0.0226473	0.146484		0.252305
A70	0.0117304	0.081058	0.0208473	0.142907		0.256543
A71	0.0117827	0.0831163	0.0302727	0.141447		0.266618
A72	0.0116256	0.0733787	0.0221236	0.150111		0.257239
A73	0.0106481	0.0780326	0.0179018	0.131876		0.238458
A74	0.0125333	0.0719818	0.02412	0.153838		0.262473
A75	0.014628	0.0739326	0.0208473	0.138323		0.247731
A76	0.0233036	0.0709567	0.0333491	0.187588		0.315197
A77	0.0110321	0.0738995	0.0209127	0.143058		0.248903
A78	0.0198124	0.082984	0.0353127	0.157112		0.295222
A79	0.0125857	0.0753709	0.0292909	0.145124		0.262371
A80	0.0114336	0.0739078	0.0220254	0.138323		0.24569
A81	0.0184509	0.0791898	0.0251345	0.146333		0.269108
A82	0.0109274	0.0591609	0.01296	0.145174		0.228222
A83	0.163265	0.0733457	0.244898	0.428571		0.91008
A84	0.0117827	0.0789088	0.0236945	0.145124		0.25951
A85	0.0113114	0.0732795	0.0207163	0.143663		0.24897
A86	0.012062	0.0733209	0.0272291	0.149405		0.262017
A87	0.0250143	0.0780739	0.0335127	0.156709		0.29331
A88	0.011486	0.0730316	0.0207818	0.142303		0.247602
A89	0.0116082	0.069444	0.0234982	0.146685		0.251236
A90	0.0113638	0.069444	0.0220582	0.145728		0.248594
A91	0.0113114	0.069444	0.0216654	0.145376		0.247797
A92	0.0112067	0.0737838	0.0215018	0.142404		0.248896
A93	0.0116955	0.0810084	0.0238582	0.146937		0.263499
A94	0.00850102	0.0743376	0.0191454	0.126788		0.228772
A95	0.0123588	0.0696672	0.0271309	0.153838		0.262995
A96	0.011678	0.0747179	0.0212073	0.126587		0.23419
A97	0.0112765	0.0532754	0.139974	0.143965		0.348492
A98	0.0177177	0.0781979	0.124102	0.179176		0.399193
A99	0.0370414	0.0716676	0.0491891	0.277604		0.435502
A100	0.0129174	0.0778094	0.0225163	0.145325		0.258568
A101	0.0138774	0.0716759	0.0311563	0.148146		0.264856
A102	0.0112067	0.0851911	0.0164945	0.140489		0.253382
A103	0.0125857	0.0790328	0.0218291	0.134394		0.247842
A104	0.0128475	0.0765529	0.0248073	0.147945		0.262152
A105	0.0112241	0.0762967	0.0210763	0.144419		0.253016
A106	0.0165482	0.0788675	0.0288	0.163711		0.287927
A107	0.0112241	0.0775945	0.0209782	0.144419		0.254215
A108	0.0119573	0.0752138	0.0226473	0.145527		0.255345
A109	0.0116955	0.0815374	0.0300763	0.144121		0.267431
A110	0.0115558	0.0731638	0.0216654	0.145073		0.251458
A111	0.0128999	0.0752882	0.0297818	0.146685		0.264655
A112	0	0.0732795	0.0214363	0.043522		0.138238
A113	0.0128825	0.0792725	0.0294218	0.13248		0.254057
A114	0.0119922	0.0741806	0.0246109	0.14331		0.254094
A115	0.0119224	0.0724116	0.0259527	0.145577		0.255864
A116	0.0123937	0.0837445	0.0254945	0.145527		0.267159
A117	0.0112765	0.0650216	0.0288	0.149154		0.254252
A118	0.00895487	0.0723785	0.0306982	0.14467		0.256702
A119	0.0117827	0.0724116	0.0238582	0.14729		0.255342
A120	0.0190968	0.073139	0.0263782	0.189553		0.308166
A121	0.0117129	0.0751808	0.0206182	0.142907		0.250419
A122	0.0114336	0.163265	0.0117818	0.145728		0.332209
A123	0.0177177	0.0726265	0.0342327	0.175297		0.299874
A124	0.0110147	0.074288	0.0222545	0.143764		0.251321
A125	0.0129523	0.0858358	0.0210763	0.137014		0.256878
A126	0.0117129	0.0756519	0.0198327	0.139935		0.247133
A127	0.0114511	0.080281	0.0224509	0.141144		0.255327
A128	0.0117304	0.0737342	0.0220582	0.146786		0.254309
A129	0.0112591	0.0846042	0.0204873	0.141698		0.258049
A130	0.0118875	0.0858276	0.0217963	0.143058		0.26257
A131	0.0115209	0.0749162	0.0234982	0.148348		0.258283
A132	0.00996732	0.082827	0.0198982	0.136812		0.249505
A133	0.0116256	0.0684108	0.02088	0.144066		0.244982
A134	0.0112416	0.0778755	0.0206836	0.143361		0.253161
A135	0.0115383	0.0759495	0.0211745	0.144016		0.252678
A136	0.0115383	0.0738168	0.0214691	0.145527		0.252351
A137	0.0114162	0.0840586	0.0213742	0.142857		0.259706
A138	0.0114685	0.0782806	0.0212073	0.144217		0.255173
A139	0.0118351	0.0840421	0.0204545	0.141799		0.258131
A140	0.0115383	0.0786608	0.01872	0.140439		0.249358
					Min Si	0.128719
	Normalized matrix				Max Si	0.91008
	C1	C2	C3	C4		Pi	Si+Pi	kia	kib	kic	ki	rank
A1	0.190634	0.465445	0.123346	0.371885		2.89901	3.19571	0.00761776	3.91259	0.667495	1.8002	11
A2	0.0709933	0.445699	0.100227	0.336859		2.7223	2.97557	0.00709302	3.47721	0.621515	1.61702	88
A3	0.0703518	0.48352	0.0881999	0.346732		2.72334	2.98397	0.00711303	3.53493	0.623269	1.63869	48
A4	0.0837165	0.456129	0.0967526	0.328044		2.73134	2.98377	0.00711255	3.47563	0.623227	1.61748	87
A5	0.0727039	0.474457	0.0852599	0.330395		2.70653	2.95834	0.00705193	3.45711	0.617915	1.60766	99
A6	0.0714209	0.486811	0.0845917	0.334509		2.71061	2.96583	0.00706979	3.48584	0.61948	1.61887	84
A7	0.0876724	0.476735	0.107844	0.345322		2.77176	3.03831	0.00724257	3.60782	0.63462	1.67157	24
A8	0.0755907	0.499165	0.0891354	0.332158		2.72546	2.98348	0.00711187	3.51585	0.623167	1.63181	59
A9	0.0690687	0.506455	0.0809836	0.320169		2.6954	2.94641	0.0070235	3.44473	0.615424	1.60174	106
A10	0.093339	0.553744	0.0942136	0		2.14772	2.27644	0.00542645	2.19095	0.475485	1.06876	139
A11	0.0696033	0.482153	0.0881999	0.340856		2.71716	2.97493	0.00709148	3.50925	0.62138	1.62838	64
A12	0.0755907	0.485089	0.0896699	0.348025		2.73471	2.99736	0.00714496	3.55697	0.626067	1.64824	42
A13	0.0690687	0.441446	0.0895363	0.333098		2.6995	2.94753	0.00702618	3.42387	0.615659	1.59443	118
A14	0.0730247	0.443167	0.0931445	0.353315		2.72731	2.98582	0.00711744	3.52066	0.623655	1.63383	54
A15	0.075163	0.393752	0.147935	0.352139		2.77982	3.04352	0.007255	3.59015	0.635708	1.66592	30
A16	0.0724901	0.466711	0.0855272	0.335919		2.70869	2.96164	0.0070598	3.46711	0.618604	1.61165	90
A17	0.0672511	0.32368	0.0923426	0.3378		2.66143	2.89264	0.00689533	3.27207	0.604193	1.53327	132
A18	0.0747354	0.453192	0.0983563	0.340268		2.73025	2.98636	0.00711873	3.50365	0.623768	1.62782	67
A19	0.0707794	0.41927	0.0875317	0.334861		2.69311	2.93806	0.00700361	3.39642	0.613681	1.58343	127
A20	0.253715	0.515923	0.357343	0.416432		3.16118	3.55282	0.00846902	4.79553	0.742086	2.1599	5
A21	0.0915214	0.479874	0.0876654	0.329807		2.7364	2.9925	0.00713337	3.50703	0.625051	1.6298	60
A22	0.0543141	0.476178	0.0847254	0.327574		2.67362	2.92137	0.00696381	3.40731	0.610194	1.58522	125
A23	0.0704587	0.438408	0.0938126	0.338035		2.71093	2.96186	0.00706033	3.45269	0.618651	1.60653	101
A24	0.0711002	0.522657	0.0761727	0.333098		2.70553	2.96389	0.00706516	3.50737	0.619074	1.62631	70
A25	0.0764461	0.4699	0.0963517	0.389398		2.77252	3.0522	0.00727569	3.71022	0.637521	1.70985	18
A26	0.0759115	0.535062	0.0960845	0.336977		2.75022	3.01792	0.00719397	3.60478	0.630361	1.66791	29
A27	0.0689618	0.435016	0.0886008	0.340386		2.70164	2.9515	0.00703563	3.43924	0.616487	1.60042	108
A28	0.0658612	0	0.0992917	0.348143		1.84561	2.02989	0.00483874	2.45503	0.423987	1.1327	138
A29	0.0744146	0.493443	0.0939463	0.342266		2.73734	2.99974	0.00715063	3.55649	0.626563	1.64837	41
A30	0.0801882	0.498	0.105172	0.364363		2.77958	3.05588	0.00728446	3.68795	0.63829	1.70238	19
A31	0.136641	0.558301	0.55753	0.0206864		2.6882	2.94707	0.00702507	3.50174	0.615561	1.62218	79
A32	0.0740939	0.368336	0.107711	0.355665		2.7249	2.97593	0.00709388	3.4613	0.621591	1.61138	91
A33	0.0719555	0.494203	0.0843245	0.336154		2.71449	2.97164	0.00708364	3.50301	0.620694	1.62573	72
A34	0.0711002	0.336439	0.123079	0.332628		2.70911	2.94834	0.00702811	3.36083	0.615828	1.572	129
A35	0.0733455	0.479368	0.0887345	0.332158		2.71575	2.97007	0.00707991	3.48174	0.620367	1.61794	85
A36	0.0655405	0.487874	0.10143	0.34591		2.73575	2.99919	0.00714932	3.56366	0.626449	1.65086	38
A37	0.0708863	0.479824	0.092209	0.34779		2.7299	2.99145	0.00713086	3.54571	0.624831	1.64348	44
A38	0.0748423	0.353552	0.141521	0.341561		2.74933	3.00031	0.007152	3.47442	0.626683	1.61914	82
A39	0.0773014	0.43618	0.102633	0.340268		2.73433	2.98913	0.00712534	3.49573	0.624347	1.62534	73
A40	0.0735593	0.477799	0.0982226	0.342031		2.73738	2.99804	0.00714658	3.54295	0.626208	1.64332	45
A41	0.0815781	0.482963	0.110116	0.357428		2.77818	3.0505	0.00727162	3.65618	0.637165	1.69036	20
A42	0.0701379	0.434813	0.0926099	0.335096		2.70516	2.9539	0.00704135	3.43245	0.616988	1.5983	111
A43	0.0744146	0.473039	0.0955499	0.333686		2.72671	2.98249	0.00710952	3.4992	0.622961	1.62574	71
A44	0.0715279	0.498253	0.0808499	0.324871		2.70035	2.9524	0.00703778	3.45559	0.616675	1.60637	102
A45	0.0839303	0.509392	0.146198	0.340503		2.81766	3.09626	0.00738071	3.72688	0.646724	1.72137	15
A46	0.0718486	0.484583	0.0938126	0.339798		2.72882	2.98826	0.00712327	3.5288	0.624166	1.63704	50
A47	0.0928044	0.46985	0.161299	0.334039		2.82702	3.10154	0.0073933	3.70037	0.647826	1.71259	17
A48	0.0898108	0.446256	0.108112	0.197579		2.63033	2.829	0.00674363	3.00204	0.5909	1.4286	135
A49	0.0689618	0.492785	0	0.325576		2.15532	2.38657	0.00568898	2.99169	0.498489	1.36925	137
A50	0.0701379	0.324996	0.132567	0.33968		2.71957	2.96213	0.00706097	3.39243	0.618707	1.58503	126
A51	0.0745215	0.517645	0.0948817	0.337212		2.74183	3.00627	0.00716619	3.57477	0.627926	1.65572	33
A52	0.0740939	0.512936	0.086329	0.309591		2.70446	2.95413	0.0070419	3.4393	0.617036	1.60077	107
A53	0.0846787	0.49481	0.106508	0.341208		2.76834	3.03527	0.00723532	3.60882	0.633984	1.67154	25
A54	0.072597	0.473495	0.102633	0.33827		2.73781	2.99708	0.00714428	3.53237	0.626007	1.63943	47
A55	0.0750561	0.484026	0.0900708	0.338387		2.72663	2.98499	0.00711546	3.51914	0.623481	1.63318	55
A56	0.0668235	0.209508	0.105573	0.278444		2.57242	2.76272	0.00658564	2.9049	0.577056	1.38551	136
A57	0.0684272	0.419928	0.095149	0.341208		2.70618	2.95545	0.00704505	3.43715	0.617312	1.60017	109
A58	0.0715279	0.506455	0.0859281	0.329807		2.71485	2.9716	0.00708356	3.50013	0.620686	1.6247	74
A59	0.0796536	0.4699	0.0924763	0.338975		2.73279	2.99044	0.00712845	3.517	0.62462	1.6331	57
A60	0.0702448	0.451876	0.0872778	0.33968		2.70643	2.95863	0.00705263	3.46005	0.617976	1.60875	97
A61	0.0797605	0.448129	0.0991581	0.341913		2.73807	2.99507	0.00713949	3.51494	0.625587	1.63295	58
A62	0.273495	0.504278	0.352265	0.527033		3.23795	3.67707	0.00876521	5.207	0.768039	2.32188	2
A63	0.0720624	0.513493	0.0940799	0.330395		2.73044	2.99068	0.00712903	3.53585	0.62467	1.63986	46
A64	0.0956912	0.468837	0.136844	0.35543		2.82171	3.09972	0.00738896	3.7245	0.647446	1.72097	16
A65	0.0744146	0.57511	0.0930108	0.331688		2.75009	3.02106	0.00720145	3.63015	0.631016	1.67735	22
A66	0.0704587	0.496127	0.0963517	0.342971		2.73635	2.99944	0.00714992	3.56126	0.626501	1.65004	40
A67	0.0753769	0.502506	0.0876654	0.334391		2.72568	2.9848	0.00711503	3.52457	0.623444	1.63509	52
A68	0.0699241	0.447572	0.0919417	0.327339		2.70173	2.94902	0.00702974	3.41936	0.61597	1.59301	121
A69	0.0698172	0.439623	0.0924763	0.341796		2.71138	2.96369	0.00706469	3.46364	0.619033	1.61067	92
A70	0.0718486	0.496481	0.0851263	0.333451		2.7141	2.97064	0.00708127	3.49808	0.620486	1.62385	76
A71	0.0721694	0.509088	0.123614	0.330042		2.76781	3.03443	0.00723332	3.60613	0.633809	1.67047	26
A72	0.0712071	0.449446	0.0903381	0.350259		2.72009	2.97733	0.00709721	3.5068	0.621883	1.62781	68
A73	0.0652197	0.47795	0.073099	0.30771		2.65721	2.89567	0.00690255	3.32603	0.604826	1.55294	130
A74	0.0767668	0.440889	0.0984899	0.358956		2.74398	3.00645	0.00716662	3.56071	0.627964	1.65073	39
A75	0.0895969	0.452838	0.0851263	0.322755		2.71601	2.96374	0.00706482	3.43068	0.619044	1.59891	110
A76	0.142735	0.434611	0.136175	0.437706		2.91601	3.23121	0.0077024	4.06572	0.674911	1.85926	7
A77	0.0675719	0.452635	0.0853936	0.333803		2.69496	2.94386	0.00701742	3.4281	0.614891	1.59548	116
A78	0.121351	0.508278	0.144194	0.366596		2.87689	3.17212	0.00756153	3.88884	0.662568	1.78874	12
A79	0.0770876	0.461648	0.119604	0.338622		2.76273	3.0251	0.00721107	3.57032	0.631859	1.65651	32
A80	0.070031	0.452686	0.0899372	0.322755		2.69679	2.94248	0.00701413	3.40416	0.614602	1.58675	124
A81	0.113012	0.485039	0.102633	0.341443		2.79265	3.06176	0.00729847	3.63925	0.639517	1.68575	21
A82	0.0669304	0.362361	0.05292	0.33874		2.60603	2.83425	0.00675615	3.21813	0.591997	1.50665	134
A83	1	0.449243	1	1		3.87753	4.78761	0.0114125	9.22047	1	3.88274	1
A84	0.0721694	0.483317	0.0967526	0.338622		2.73222	2.99173	0.00713154	3.53118	0.624891	1.63833	49
A85	0.0692826	0.448838	0.0845917	0.335214		2.69625	2.94522	0.00702066	3.42935	0.615175	1.5961	115
A86	0.07388	0.449091	0.111185	0.348613		2.75157	3.01358	0.00718363	3.56138	0.629455	1.65187	36
A87	0.153213	0.478204	0.136844	0.365656		2.88688	3.18019	0.00758077	3.87953	0.664254	1.78644	13
A88	0.0703518	0.447319	0.084859	0.33204		2.69526	2.94286	0.00701504	3.41817	0.614682	1.59181	122
A89	0.0711002	0.425346	0.0959508	0.342266		2.71405	2.96528	0.00706849	3.45681	0.619366	1.60844	98
A90	0.0696033	0.425346	0.0900708	0.340033		2.70137	2.94996	0.00703197	3.42926	0.616166	1.59666	113
A91	0.0692826	0.425346	0.0884672	0.33921		2.69779	2.94559	0.00702155	3.42108	0.615253	1.59319	119
A92	0.0686411	0.451926	0.087799	0.332276		2.69889	2.94779	0.00702679	3.43023	0.615712	1.59674	112
A93	0.0716348	0.496177	0.0974208	0.342854		2.73956	3.00306	0.00715853	3.56623	0.627256	1.65227	35
A94	0.0520689	0.455319	0.0781772	0.295839		2.62575	2.85452	0.00680447	3.23334	0.596232	1.51463	133
A95	0.0756976	0.426713	0.110784	0.358956		2.75438	3.01738	0.00719267	3.57054	0.630247	1.65562	34
A96	0.0715279	0.457648	0.0865963	0.295369		2.67251	2.9067	0.00692885	3.30135	0.60713	1.54551	131
A97	0.0690687	0.326313	0.571562	0.335919		2.97782	3.32631	0.0079291	4.35865	0.694776	1.97562	6
A98	0.108521	0.478963	0.506749	0.418077		3.11743	3.51663	0.00838276	4.82996	0.734526	2.16745	4
A99	0.226879	0.438965	0.200855	0.647743		3.16428	3.59978	0.00858097	5.13802	0.751895	2.28741	3
A100	0.079119	0.476583	0.0919417	0.339093		2.73341	2.99197	0.00713212	3.52452	0.624941	1.63598	51
A101	0.0849995	0.439016	0.127222	0.345675		2.78074	3.04559	0.00725993	3.59961	0.636141	1.66956	27
A102	0.0686411	0.521796	0.0673527	0.327809		2.6815	2.93488	0.00699602	3.45544	0.613016	1.60411	104
A103	0.0770876	0.484077	0.0891354	0.313587		2.70792	2.95576	0.00704579	3.42705	0.617377	1.5966	114
A104	0.0786913	0.468888	0.101296	0.345205		2.74869	3.01084	0.00717709	3.56084	0.628882	1.65133	37
A105	0.068748	0.467318	0.0860617	0.336977		2.70495	2.95796	0.00705105	3.4656	0.617837	1.61065	93
A106	0.101358	0.483064	0.1176	0.381993		2.83022	3.11815	0.00743288	3.80629	0.651295	1.75246	14
A107	0.068748	0.475267	0.0856608	0.336977		2.70676	2.96097	0.00705822	3.47592	0.618466	1.61472	89
A108	0.0732385	0.460686	0.0924763	0.339563		2.7214	2.97674	0.00709581	3.49282	0.621759	1.62274	78
A109	0.0716348	0.499418	0.122812	0.336283		2.76828	3.03571	0.00723637	3.6127	0.634076	1.67298	23
A110	0.0707794	0.448129	0.0884672	0.338505		2.70693	2.95839	0.00705207	3.4546	0.617927	1.60678	100
A111	0.0790121	0.461141	0.121609	0.342266		2.77054	3.03519	0.00723514	3.59239	0.633968	1.66567	31
A112	0	0.448838	0.0875317	0.101551		1.80336	1.9416	0.00462828	2.07395	0.405546	0.985351	140
A113	0.0789052	0.485545	0.120139	0.309121		2.74909	3.00315	0.00715875	3.49816	0.627274	1.62798	65
A114	0.0734524	0.454357	0.100494	0.334391		2.72708	2.98117	0.00710636	3.48625	0.622684	1.62095	81
A115	0.0730247	0.443522	0.105974	0.33968		2.73467	2.99053	0.00712869	3.50421	0.62464	1.62855	63
A116	0.0759115	0.512936	0.104103	0.339563		2.75724	3.0244	0.00720942	3.60448	0.631715	1.66862	28
A117	0.0690687	0.398258	0.1176	0.348025		2.735	2.98925	0.00712562	3.49186	0.624371	1.62397	75
A118	0.0548487	0.443319	0.125351	0.337565		2.72737	2.98407	0.00711328	3.50667	0.623291	1.62861	62
A119	0.0721694	0.443522	0.0974208	0.343677		2.72481	2.98015	0.00710393	3.49469	0.622472	1.62384	77
A120	0.116968	0.447977	0.107711	0.44229		2.86596	3.17412	0.00756632	3.98334	0.662987	1.82266	9
A121	0.0717417	0.460483	0.0841908	0.333451		2.70157	2.95199	0.0070368	3.44355	0.616589	1.60202	105
A122	0.070031	1	0.048109	0.340033		2.75332	3.08553	0.00735514	4.10766	0.644483	1.85553	8
A123	0.108521	0.444838	0.139784	0.409027		2.87135	3.17122	0.00755939	3.9219	0.66238	1.80041	10
A124	0.067465	0.455015	0.0908726	0.335449		2.70526	2.95658	0.00704775	3.4526	0.617548	1.60584	103
A125	0.0793328	0.525746	0.0860617	0.319699		2.72339	2.98026	0.0071042	3.50583	0.622495	1.62783	66
A126	0.0717417	0.463369	0.0809836	0.326516		2.69171	2.93884	0.00700545	3.41255	0.613842	1.58929	123
A127	0.0701379	0.491722	0.0916745	0.329337		2.71685	2.97218	0.00708492	3.49016	0.620806	1.62121	80
A128	0.0718486	0.451623	0.0900708	0.342501		2.71524	2.96955	0.00707866	3.48135	0.620257	1.61774	86
A129	0.0689618	0.518202	0.0836563	0.33063		2.71142	2.96947	0.00707847	3.50829	0.62024	1.62734	69
A130	0.0728109	0.525695	0.0890017	0.333803		2.73016	2.99273	0.00713392	3.5538	0.625099	1.64653	43
A131	0.0705656	0.458863	0.0959508	0.346145		2.72714	2.98543	0.00711651	3.51883	0.623573	1.63312	56
A132	0.0610499	0.507316	0.0812508	0.319229		2.68241	2.93192	0.00698896	3.42583	0.612397	1.59316	120
A133	0.0712071	0.419017	0.0852599	0.336154		2.69116	2.93614	0.00699903	3.39554	0.613279	1.58288	128
A134	0.0688549	0.476989	0.0844581	0.334509		2.70358	2.95674	0.00704812	3.46597	0.617581	1.61063	94
A135	0.0706725	0.465192	0.0864626	0.336037		2.70708	2.95976	0.00705533	3.46416	0.618213	1.61036	95
A136	0.0706725	0.452129	0.0876654	0.339563		2.70766	2.96001	0.00705592	3.46194	0.618265	1.6096	96
A137	0.0699241	0.51486	0.0872778	0.333333		2.71979	2.9795	0.00710238	3.52581	0.622335	1.63486	53
A138	0.0702448	0.479469	0.0865963	0.336507		2.71139	2.96656	0.00707154	3.48593	0.619633	1.619	83
A139	0.0724901	0.514759	0.0835227	0.330865		2.7157	2.97384	0.00708888	3.5113	0.621152	1.62897	61
A140	0.0706725	0.481798	0.0764399	0.327692		2.68911	2.93847	0.00700458	3.4284	0.613766	1.59491	117
					Min Pi	1.80336	419.507
					Max Pi	3.87753

## Sheet: 20_12
2021/06	C1	C2	C3	C4
A1	-6.73	7.89	-1.42	-2.78
A2	0.42	-4.43	2.45	0.79
A3	0.19	1	0.13	0.46
A4	0.56	3.12	0.6	-0.36
A5	0.42	3.04	0.33	0.01
A6	1	12.12	1.08	0.64
A7	5.98	3.43	5.23	2.5
A8	0.36	2.99	-0.23	-0.54
A9	1.35	8.46	-0.41	-0.67
A10	-1.94	3.66	0.16	-39.52
A11	0.44	7.37	0.17	0.14
A12	0.94	7.76	0.02	0.17
A13	0.43	9.26	0.21	-0.11
A14	1.05	9.25	0.35	0.69
A15	0.43	10.59	0.47	-0.49
A16	0.88	3.93	0.25	0.06
A17	0.31	23.42	-0.03	0.37
A18	0.82	4.88	0.77	0.21
A19	0.93	-10.09	2.92	0.67
A20	0.65	6.19	10.96	-1.95
A21	0.37	6.26	0.29	0.28
A22	1	-0.71	0.08	0.15
A23	0.8	23.12	0.41	0.29
A24	0.78	12.57	1.19	0.39
A25	0.44	-2.14	-0.2	-1.74
A26	1.29	6.83	1.29	0.2
A27	0.42	2.44	0.51	0.9
A28	0.12	11.53	0.33	0.54
A29	0.52	5.35	-0.44	-0.32
A30	0.13	-1.22	0.01	-0.44
A31	6.87	-6.58	-6.38	-5.13
A32	3.79	26.41	5.07	-1.14
A33	0.54	-0.12	0.83	0.54
A34	0.35	40.94	-4.49	-0.41
A35	-0.46	-11.93	0.12	-0.28
A36	3.83	6.86	-0.04	-0.58
A37	0.12	2.51	0.21	0.29
A38	1.42	5.98	8.94	0.8
A39	0.55	8.02	-0.03	-0.58
A40	0.52	5.11	0.41	-0.03
A41	-0.86	-4.02	-2.27	-3.67
A42	0.3	-4.99	0.63	0.001
A43	0.69	1.64	1.59	0.38
A44	0.45	6.9	0.38	0.05
A45	-1.03	16.83	-7.46	-2.27
A46	0.49	11.76	-0.26	-0.18
A47	2.32	-9.68	6.14	-1.63
A48	-0.8	-0.36	1.06	-6.68
A49	0.38	42.18	-10.45	-1.37
A50	0.39	29.65	-3.27	-0.61
A51	0.95	14.11	0.18	0.05
A52	5.73	5.66	4.14	4.42
A53	0.46	5.17	0.21	-0.16
A54	1.34	13.41	0.6	0.33
A55	1.12	8.86	0.5	0.3
A56	0.4	44.25	-4.24	-1.3
A57	0.4	1.66	1.22	0.45
A58	1.19	15.45	0.87	0.51
A59	0.77	6.27	0.04	-0.08
A60	1.22	4.97	0.49	0.87
A61	-2.24	0.29	-0.61	-7.52
A62	-0.39	9.53	-7.63	-17.32
A63	0.63	8.37	0.82	-0.62
A64	-2.81	16.29	-2.49	-1.07
A65	1.55	12.04	-0.15	-0.07
A66	1.26	7.66	0.96	0.5
A67	2.12	8.79	1.33	0.75
A68	0.05	3.51	-0.01	-0.76
A69	0.4	3.41	0.89	0.45
A70	1.1	4.58	0.69	0.18
A71	3.36	-12.62	7.72	2.42
A72	0.5	5.77	0.05	0.19
A73	0.5	6.75	1.7	0.57
A74	-0.38	-4.14	-0.24	-1.15
A75	-0.3	5.28	-0.32	-0.76
A76	-3.24	1.74	-2.1	-6.15
A77	1.59	6.14	0.38	0.64
A78	5.71	7.47	2.68	0.58
A79	1.49	4.8	6.28	1.01
A80	0.44	2.55	-0.19	-0.31
A81	25.05	5.85	8.72	4.99
A82	0.39	25.87	1.19	2.08
A83	-1.84	4.45	0.76	-15.71
A84	0.76	24.98	-0.86	-0.12
A85	0.38	12.11	-0.01	0.04
A86	-0.45	2.21	-0.55	-0.85
A87	11.93	0.52	7.34	4.14
A88	0.41	2.29	0.32	0.51
A89	0.37	13	-0.24	-0.15
A90	0.52	13	0.25	0.21
A91	0.62	13	0.57	0.41
A92	3.59	0.43	0.99	0.67
A93	0.27	-3.24	-0.72	0.1
A94	3.67	4.11	2.08	0.98
A95	0.53	13.99	-0.72	-0.77
A96	2.37	1.3	1.53	0.52
A97	0.31	150.6	-44.82	-0.39
A98	0.7	0.82	-10.53	-3.84
A99	38.01	-8.5	18.27	22.9
A100	3.99	3.1	2.22	2.13
A101	0.8	6.04	1.68	-0.12
A102	1.14	17.35	3.04	1.1
A103	0.39	8.03	0.04	-0.88
A104	0.09	1.68	-0.23	-0.47
A105	0.31	8.31	0.02	0.46
A106	1.13	4.21	0.03	-0.82
A107	0.41	5.49	-0.05	0.24
A108	0.22	2.71	-0.3	-0.35
A109	-0.12	28.05	-7.91	-0.69
A110	0.32	0.13	0.06	0.09
A111	0.97	2.28	1	-0.22
A112	2.45	14.74	0.08	0.35
A113	-9.06	9.5	-5.81	-9.86
A114	2.25	9.97	5	1.22
A115	0.54	20.14	1.14	0.23
A116	0.86	10.1	0.44	0.06
A117	0.53	12.98	0.31	-0.44
A118	-1.35	48.86	-2.76	-0.25
A119	0.35	0.52	0.36	0.09
A120	4.96	0.81	0.04	-8.1
A121	1.08	20.63	2.94	0.24
A122	0.25	12.54	0.18	0.26
A123	9.99	5.53	4.76	2.81
A124	0.28	11.58	-0.28	0.21
A125	0.4	4.05	-0.16	-0.67
A126	0.28	10.87	0.11	-0.29
A127	0.5	6.82	0.48	-0.11
A128	0.96	6.33	0.6	0.67
A129	0.62	7.72	0.34	0.07
A130	1.35	18.57	1.54	0.29
A131	0.27	4.96	-0.03	-0.11
A132	0.38	-3.64	-2.21	-1.07
A133	0.28	7.87	0.3	0.18
A134	0.4	4.97	-0.07	-0.35
A135	1.05	0.23	0.25	0.01
A136	0.23	-0.01	0.37	0.45
A137	0.73	9.57	0.06	-0.02
A138	0.42	6.19	-0.18	-0.01
A139	1.01	11.38	1.29	0.26
A140	0.26	-1.14	0.2	-0.14
MAX	38.01	150.6	18.27	22.9
MIN	-9.06	-12.62	-44.82	-39.52
	1	1	1	1
	Normalization
	C1	C2	C3	C4
A1	0.0495007	0.125659	0.687906	0.588593
A2	0.201402	0.0501777	0.749247	0.645787
A3	0.196516	0.0834457	0.712474	0.6405
A4	0.204376	0.0964343	0.719924	0.627363
A5	0.201402	0.0959441	0.715644	0.633291
A6	0.213724	0.151575	0.727532	0.643384
A7	0.319524	0.0983335	0.793311	0.673182
A8	0.200127	0.0956378	0.706768	0.624479
A9	0.22116	0.129151	0.703915	0.622397
A10	0.151264	0.0997427	0.71295	0
A11	0.201827	0.122473	0.713108	0.635373
A12	0.21245	0.124862	0.710731	0.635854
A13	0.201615	0.134052	0.713742	0.631368
A14	0.214786	0.133991	0.715961	0.644185
A15	0.201615	0.142201	0.717863	0.62528
A16	0.211175	0.101397	0.714376	0.634092
A17	0.199065	0.220806	0.709938	0.639058
A18	0.2099	0.107217	0.722618	0.636495
A19	0.212237	0.0155006	0.756697	0.643864
A20	0.206289	0.115243	0.884134	0.60189
A21	0.20034	0.115672	0.71501	0.637616
A22	0.213724	0.072969	0.711682	0.635533
A23	0.209475	0.218968	0.716912	0.637776
A24	0.20905	0.154332	0.729276	0.639378
A25	0.201827	0.0642078	0.707244	0.605255
A26	0.219885	0.119164	0.730861	0.636335
A27	0.201402	0.0922681	0.718497	0.647549
A28	0.195029	0.14796	0.715644	0.641781
A29	0.203527	0.110097	0.70344	0.628004
A30	0.195241	0.0698444	0.710572	0.626081
A31	0.338432	0.0370053	0.609288	0.550945
A32	0.272998	0.239125	0.790775	0.614867
A33	0.203952	0.0765838	0.72357	0.641781
A34	0.199915	0.328146	0.639246	0.626562
A35	0.182707	0.00422742	0.712316	0.628645
A36	0.273847	0.119348	0.70978	0.623839
A37	0.195029	0.092697	0.713742	0.637776
A38	0.222647	0.113957	0.852116	0.645947
A39	0.204164	0.126455	0.709938	0.623839
A40	0.203527	0.108626	0.716912	0.63265
A41	0.174209	0.0526896	0.674433	0.574335
A42	0.198853	0.0467467	0.720399	0.633146
A43	0.207138	0.0873667	0.735616	0.639218
A44	0.20204	0.119593	0.716437	0.633931
A45	0.170597	0.180431	0.59217	0.596764
A46	0.202889	0.149369	0.706293	0.630247
A47	0.241768	0.0180125	0.807735	0.607017
A48	0.175483	0.0751133	0.727215	0.526113
A49	0.200552	0.335743	0.544777	0.611182
A50	0.200765	0.258976	0.658583	0.623358
A51	0.212662	0.163767	0.713267	0.633931
A52	0.314213	0.111996	0.776034	0.703941
A53	0.202252	0.108994	0.713742	0.630567
A54	0.220948	0.159478	0.719924	0.638417
A55	0.216274	0.131602	0.718339	0.637937
A56	0.200977	0.348425	0.643208	0.612304
A57	0.200977	0.0874893	0.729751	0.64034
A58	0.217761	0.171976	0.724204	0.641301
A59	0.208838	0.115733	0.711048	0.631849
A60	0.218398	0.107769	0.71818	0.647068
A61	0.144891	0.0790957	0.700745	0.512656
A62	0.184194	0.135706	0.589475	0.355655
A63	0.205864	0.128599	0.723411	0.623198
A64	0.132781	0.177123	0.670946	0.615988
A65	0.225409	0.151084	0.708036	0.632009
A66	0.219248	0.124249	0.72563	0.641141
A67	0.237519	0.131173	0.731495	0.645146
A68	0.193542	0.0988237	0.710255	0.620955
A69	0.200977	0.098211	0.724521	0.64034
A70	0.215849	0.105379	0.72135	0.636014
A71	0.263862	0	0.832779	0.6719
A72	0.203102	0.11267	0.711206	0.636174
A73	0.203102	0.118674	0.737359	0.642262
A74	0.184406	0.0519544	0.70661	0.614707
A75	0.186106	0.109668	0.705342	0.620955
A76	0.123646	0.0879794	0.677128	0.534604
A77	0.226259	0.114937	0.716437	0.643384
A78	0.313788	0.123085	0.752893	0.642422
A79	0.224134	0.106727	0.809954	0.649311
A80	0.201827	0.092942	0.707402	0.628164
A81	0.724665	0.11316	0.848629	0.713073
A82	0.200765	0.235817	0.729276	0.666453
A83	0.153389	0.104583	0.72246	0.381448
A84	0.208625	0.230364	0.696782	0.631208
A85	0.200552	0.151513	0.710255	0.633771
A86	0.182919	0.090859	0.701696	0.619513
A87	0.445932	0.0805048	0.826755	0.699455
A88	0.20119	0.0913491	0.715486	0.641301
A89	0.20034	0.156966	0.70661	0.630727
A90	0.203527	0.156966	0.714376	0.636495
A91	0.205651	0.156966	0.719448	0.639699
A92	0.268749	0.0799534	0.726106	0.643864
A93	0.198215	0.0574684	0.699001	0.634732
A94	0.270448	0.1025	0.743382	0.648831
A95	0.203739	0.163031	0.699001	0.620795
A96	0.24283	0.0852837	0.734665	0.641461
A97	0.199065	1	0	0.626882
A98	0.207351	0.0823429	0.543509	0.571612
A99	1	0.025242	1	1
A100	0.277247	0.0963117	0.745602	0.667254
A101	0.209475	0.114324	0.737042	0.631208
A102	0.216699	0.183617	0.758599	0.650753
A103	0.200765	0.126516	0.711048	0.619032
A104	0.194391	0.0876118	0.706768	0.625601
A105	0.199065	0.128232	0.710731	0.6405
A106	0.216486	0.103112	0.710889	0.619994
A107	0.20119	0.110955	0.709621	0.636975
A108	0.197153	0.0939223	0.705659	0.627523
A109	0.18993	0.249173	0.585037	0.622076
A110	0.199278	0.0781154	0.711365	0.634572
A111	0.213087	0.0912878	0.726264	0.629606
A112	0.244529	0.167627	0.711682	0.638738
A113	0	0.135523	0.618323	0.475168
A114	0.24028	0.138402	0.789666	0.652675
A115	0.203952	0.200711	0.728483	0.636815
A116	0.21075	0.139199	0.717388	0.634092
A117	0.203739	0.156844	0.715327	0.626081
A118	0.163799	0.37667	0.666667	0.629125
A119	0.199915	0.0805048	0.71612	0.634572
A120	0.297854	0.0822816	0.711048	0.503364
A121	0.215424	0.203713	0.757014	0.636975
A122	0.197791	0.154148	0.713267	0.637296
A123	0.404716	0.1112	0.785861	0.678148
A124	0.198428	0.148266	0.705976	0.636495
A125	0.200977	0.102132	0.707878	0.622397
A126	0.198428	0.143916	0.712157	0.628484
A127	0.203102	0.119103	0.718022	0.631368
A128	0.212874	0.116101	0.719924	0.643864
A129	0.205651	0.124617	0.715803	0.634252
A130	0.22116	0.191092	0.734823	0.637776
A131	0.198215	0.107707	0.709938	0.631368
A132	0.200552	0.0550178	0.675384	0.615988
A133	0.198428	0.125536	0.715169	0.636014
A134	0.200977	0.107769	0.709304	0.627523
A135	0.214786	0.0787281	0.714376	0.633291
A136	0.197366	0.0772577	0.716278	0.64034
A137	0.207988	0.135951	0.711365	0.63281
A138	0.201402	0.115243	0.707561	0.63297
A139	0.213937	0.147041	0.730861	0.637296
A140	0.198003	0.0703345	0.713584	0.630888
	0.163265	0.163265	0.244898	0.428571
	Weighted normalized matrix
	C1	C2	C3	C4		Si	λ
A1	0.00808174	0.0205157	0.168467	0.252254		0.449318	0.5
A2	0.0328819	0.00819226	0.183489	0.276765		0.501329
A3	0.0320842	0.0136238	0.174484	0.2745		0.494691
A4	0.0333675	0.0157443	0.176308	0.26887		0.494289
A5	0.0328819	0.0156643	0.17526	0.27141		0.495216
A6	0.0348937	0.0247468	0.178171	0.275736		0.513547
A7	0.0521671	0.0160544	0.19428	0.288506		0.551008
A8	0.0326738	0.0156143	0.173086	0.267634		0.489008
A9	0.0361077	0.0210858	0.172387	0.266741		0.496322
A10	0.0246961	0.0162845	0.1746	0		0.215581
A11	0.0329513	0.0199955	0.174639	0.272303		0.499888
A12	0.0346856	0.0203856	0.174057	0.272509		0.501636
A13	0.0329166	0.021886	0.174794	0.270586		0.500183
A14	0.0350671	0.021876	0.175337	0.276079		0.508359
A15	0.0329166	0.0232164	0.175803	0.267977		0.499913
A16	0.0344775	0.0165546	0.174949	0.271753		0.497735
A17	0.0325004	0.0360499	0.173862	0.273882		0.516294
A18	0.0342693	0.0175048	0.176968	0.272783		0.501525
A19	0.0346509	0.0025307	0.185314	0.275942		0.498437
A20	0.0336797	0.0188152	0.216523	0.257953		0.52697
A21	0.0327085	0.0188852	0.175105	0.273264		0.499962
A22	0.0348937	0.0119133	0.174289	0.272371		0.493468
A23	0.0342	0.0357499	0.17557	0.273332		0.518853
A24	0.0341306	0.0251969	0.178598	0.274019		0.511945
A25	0.0329513	0.0104829	0.173203	0.259395		0.476031
A26	0.0358996	0.0194554	0.178986	0.272715		0.507056
A27	0.0328819	0.0150642	0.175959	0.277521		0.501425
A28	0.0318414	0.0241567	0.17526	0.275049		0.506307
A29	0.0332288	0.017975	0.172271	0.269144		0.492619
A30	0.031876	0.0114031	0.174018	0.26832		0.485617
A31	0.0552541	0.00604167	0.149213	0.236119		0.446628
A32	0.044571	0.0390408	0.193659	0.263514		0.540785
A33	0.0332982	0.0125034	0.177201	0.275049		0.498051
A34	0.0326391	0.0535748	0.15655	0.268526		0.51129
A35	0.0298296	0.00069019	0.174445	0.269419		0.474383
A36	0.0447097	0.0194854	0.173824	0.267359		0.505378
A37	0.0318414	0.0151342	0.174794	0.273332		0.495102
A38	0.0363505	0.0186051	0.208682	0.276834		0.540471
A39	0.0333328	0.0206457	0.173862	0.267359		0.4952
A40	0.0332288	0.0177349	0.17557	0.271135		0.497669
A41	0.0284422	0.00860237	0.165167	0.246143		0.448355
A42	0.0324657	0.0076321	0.176424	0.271348		0.48787
A43	0.0338184	0.0142639	0.180151	0.27395		0.502184
A44	0.032986	0.0195254	0.175454	0.271685		0.49965
A45	0.0278525	0.0294581	0.145021	0.255756		0.458088
A46	0.0331247	0.0243867	0.17297	0.270105		0.500587
A47	0.0394722	0.00294081	0.197813	0.26015		0.500376
A48	0.0286503	0.0122634	0.178094	0.225477		0.444484
A49	0.0327432	0.0548151	0.133415	0.261935		0.482908
A50	0.0327779	0.0422817	0.161286	0.267153		0.503498
A51	0.0347203	0.0267374	0.174678	0.271685		0.50782
A52	0.0513	0.018285	0.190049	0.301689		0.561323
A53	0.0330207	0.0177949	0.174794	0.270243		0.495852
A54	0.036073	0.0260372	0.176308	0.273607		0.512025
A55	0.0353099	0.0214859	0.17592	0.273401		0.506117
A56	0.0328126	0.0568857	0.15752	0.262416		0.509634
A57	0.0328126	0.0142839	0.178715	0.274431		0.500242
A58	0.0355527	0.0280777	0.177356	0.274843		0.515829
A59	0.0340959	0.0188952	0.174134	0.270792		0.497917
A60	0.0356568	0.0175948	0.175881	0.277315		0.506447
A61	0.0236556	0.0129136	0.171611	0.21971		0.42789
A62	0.0300724	0.0221561	0.144361	0.152424		0.349013
A63	0.0336103	0.0209958	0.177162	0.267084		0.498852
A64	0.0216785	0.028918	0.164313	0.263995		0.478905
A65	0.0368014	0.0246668	0.173397	0.270861		0.505726
A66	0.0357955	0.0202856	0.177705	0.274774		0.508561
A67	0.0387785	0.0214159	0.179142	0.276491		0.515827
A68	0.0315986	0.0161344	0.17394	0.266123		0.487796
A69	0.0328126	0.0160344	0.177434	0.274431		0.500712
A70	0.0352405	0.0172047	0.176657	0.272577		0.50168
A71	0.0430795	0	0.203946	0.287957		0.534982
A72	0.0331594	0.0183951	0.174173	0.272646		0.498373
A73	0.0331594	0.0193753	0.180578	0.275255		0.508367
A74	0.0301071	0.00848234	0.173047	0.263446		0.475082
A75	0.0303846	0.0179049	0.172737	0.266123		0.487149
A76	0.020187	0.014364	0.165827	0.229116		0.429494
A77	0.0369401	0.0187652	0.175454	0.275736		0.506895
A78	0.0512306	0.0200955	0.184382	0.275324		0.531032
A79	0.0365933	0.0174248	0.198356	0.278276		0.53065
A80	0.0329513	0.0151742	0.173241	0.269213		0.49058
A81	0.118312	0.0184751	0.207828	0.305602		0.650217
A82	0.0327779	0.0385006	0.178598	0.285622		0.535499
A83	0.025043	0.0170747	0.176929	0.163478		0.382524
A84	0.0340612	0.0376104	0.170641	0.270517		0.51283
A85	0.0327432	0.0247368	0.17394	0.271616		0.503036
A86	0.0298643	0.0148341	0.171844	0.265505		0.482048
A87	0.072805	0.0131436	0.202471	0.299766		0.588186
A88	0.0328472	0.0149141	0.175221	0.274843		0.497825
A89	0.0327085	0.0256271	0.173047	0.270311		0.501694
A90	0.0332288	0.0256271	0.174949	0.272783		0.506588
A91	0.0335756	0.0256271	0.176191	0.274156		0.509551
A92	0.0438773	0.0130536	0.177822	0.275942		0.510694
A93	0.0323616	0.00938259	0.171184	0.272028		0.484956
A94	0.0441547	0.0167346	0.182053	0.27807		0.521012
A95	0.0332635	0.0266173	0.171184	0.266055		0.497119
A96	0.0396456	0.0139238	0.179918	0.274912		0.508399
A97	0.0325004	0.163265	0	0.268664		0.464429
A98	0.0338531	0.0134437	0.133104	0.244976		0.425377
A99	0.163265	0.00412114	0.244898	0.428571		0.840855
A100	0.0452647	0.0157243	0.182596	0.285966		0.529551
A101	0.0342	0.0186651	0.1805	0.270517		0.503883
A102	0.0353793	0.0299783	0.185779	0.278894		0.530031
A103	0.0327779	0.0206557	0.174134	0.265299		0.492867
A104	0.0317373	0.0143039	0.173086	0.268114		0.487242
A105	0.0325004	0.0209358	0.174057	0.2745		0.501992
A106	0.0353446	0.0168346	0.174095	0.265711		0.491986
A107	0.0328472	0.018115	0.173785	0.272989		0.497736
A108	0.0321882	0.0153342	0.172814	0.268938		0.489275
A109	0.0310089	0.0406812	0.143274	0.266604		0.481568
A110	0.0325351	0.0127535	0.174212	0.271959		0.49146
A111	0.0347896	0.0149041	0.177861	0.269831		0.497385
A112	0.0399231	0.0273675	0.174289	0.273744		0.515324
A113	0	0.0221261	0.151426	0.203643		0.377195
A114	0.0392294	0.0225962	0.193388	0.279718		0.534931
A115	0.0332982	0.032769	0.178404	0.27292		0.517392
A116	0.0344081	0.0227263	0.175687	0.271753		0.504574
A117	0.0332635	0.0256071	0.175182	0.26832		0.502373
A118	0.0267426	0.061497	0.163265	0.269625		0.52113
A119	0.0326391	0.0131436	0.175376	0.271959		0.493118
A120	0.0486292	0.0134337	0.174134	0.215727		0.451924
A121	0.0351712	0.0332592	0.185391	0.272989		0.526811
A122	0.0322923	0.0251669	0.174678	0.273126		0.505263
A123	0.066076	0.018155	0.192456	0.290635		0.567322
A124	0.0323963	0.0242067	0.172892	0.272783		0.502278
A125	0.0328126	0.0166746	0.173358	0.266741		0.489586
A126	0.0323963	0.0234965	0.174406	0.26935		0.499649
A127	0.0331594	0.0194454	0.175842	0.270586		0.499033
A128	0.0347549	0.0189552	0.176308	0.275942		0.50596
A129	0.0335756	0.0203456	0.175299	0.271822		0.501042
A130	0.0361077	0.0311986	0.179957	0.273332		0.520595
A131	0.0323616	0.0175848	0.173862	0.270586		0.494395
A132	0.0327432	0.00898248	0.1654	0.263995		0.471121
A133	0.0323963	0.0204956	0.175143	0.272577		0.500613
A134	0.0328126	0.0175948	0.173707	0.268938		0.493053
A135	0.0350671	0.0128535	0.174949	0.27141		0.49428
A136	0.0322229	0.0126135	0.175415	0.274431		0.494683
A137	0.0339572	0.0221961	0.174212	0.271204		0.501569
A138	0.0328819	0.0188152	0.17328	0.271273		0.49625
A139	0.0349284	0.0240066	0.178986	0.273126		0.511048
A140	0.032327	0.0114832	0.174755	0.27038		0.488945
					Min Si	0.215581
	Normalized matrix				Max Si	0.840855
	C1	C2	C3	C4		Pi	Si+Pi	kia	kib	kic	ki	rank
A1	0.0495007	0.125659	0.687906	0.588593		3.03417	3.48349	0.00673222	3.38228	0.793634	1.65663	132
A2	0.201402	0.0501777	0.749247	0.645787		3.14418	3.64551	0.00704535	3.6706	0.830547	1.7807	98
A3	0.196516	0.0834457	0.712474	0.6405		3.1799	3.67459	0.00710154	3.65509	0.837172	1.77884	100
A4	0.204376	0.0964343	0.719924	0.627363		3.1958	3.69009	0.0071315	3.66003	0.840703	1.78259	94
A5	0.201402	0.0959441	0.715644	0.633291		3.19535	3.69056	0.00713241	3.66414	0.840811	1.78412	93
A6	0.213724	0.151575	0.727532	0.643384		3.26503	3.77858	0.00730252	3.77898	0.860864	1.83652	29
A7	0.319524	0.0983335	0.793311	0.673182		3.30369	3.8547	0.00744962	3.96929	0.878206	1.91444	6
A8	0.200127	0.0956378	0.706768	0.624479		3.18646	3.67547	0.00710324	3.63154	0.837372	1.7705	109
A9	0.22116	0.129151	0.703915	0.622397		3.2313	3.72762	0.00720403	3.68465	0.849254	1.79619	77
A10	0.151264	0.0997427	0.71295	0		2.34149	2.55707	0.00494182	2.00172	0.582571	1.04236	140
A11	0.201827	0.122473	0.713108	0.635373		3.2237	3.72359	0.00719624	3.69794	0.848335	1.80045	69
A12	0.21245	0.124862	0.710731	0.635854		3.23193	3.73357	0.00721553	3.70957	0.850609	1.80589	59
A13	0.201615	0.134052	0.713742	0.631368		3.23209	3.73227	0.00721302	3.70289	0.850313	1.80333	64
A14	0.214786	0.133991	0.715961	0.644185		3.24783	3.75619	0.00725925	3.74756	0.855763	1.8224	36
A15	0.201615	0.142201	0.717863	0.62528		3.23696	3.73687	0.00722191	3.70373	0.851361	1.80421	61
A16	0.211175	0.101397	0.714376	0.634092		3.20755	3.70529	0.00716087	3.68104	0.844166	1.79206	83
A17	0.199065	0.220806	0.709938	0.639058		3.2947	3.811	0.00736516	3.80442	0.868249	1.84977	21
A18	0.2099	0.107217	0.722618	0.636495		3.21701	3.71854	0.00718648	3.70267	0.847185	1.8015	68
A19	0.212237	0.0155006	0.756697	0.643864		3.04493	3.54336	0.00684793	3.61472	0.807275	1.74765	121
A20	0.206289	0.115243	0.884134	0.60189		3.25032	3.77729	0.00730002	3.83495	0.86057	1.85642	18
A21	0.20034	0.115672	0.71501	0.637616		3.21803	3.71799	0.00718542	3.69586	0.84706	1.79899	72
A22	0.213724	0.072969	0.711682	0.635533		3.17303	3.6665	0.00708591	3.64648	0.835329	1.77472	105
A23	0.209475	0.218968	0.716912	0.637776		3.30155	3.8204	0.00738335	3.81921	0.870393	1.85628	19
A24	0.20905	0.154332	0.729276	0.639378		3.26273	3.77467	0.00729496	3.77056	0.859974	1.833	31
A25	0.201827	0.0642078	0.707244	0.605255		3.13386	3.60989	0.00697651	3.54884	0.822432	1.73249	122
A26	0.219885	0.119164	0.730861	0.636335		3.23748	3.74453	0.00723672	3.73708	0.853107	1.81716	46
A27	0.201402	0.0922681	0.718497	0.647549		3.19979	3.70122	0.007153	3.69484	0.843238	1.79649	76
A28	0.195029	0.14796	0.715644	0.641781		3.246	3.75231	0.00725175	3.73725	0.854879	1.81821	42
A29	0.203527	0.110097	0.70344	0.628004		3.20534	3.69796	0.00714671	3.65636	0.842496	1.78227	96
A30	0.195241	0.0698444	0.710572	0.626081		3.15137	3.63699	0.00702888	3.6008	0.828606	1.75458	116
A31	0.338432	0.0370053	0.609288	0.550945		3.08193	3.52856	0.00681933	3.39024	0.803903	1.66521	129
A32	0.272998	0.239125	0.790775	0.614867		3.35666	3.89745	0.00753224	3.94453	0.887945	1.91103	7
A33	0.203952	0.0765838	0.72357	0.641781		3.17948	3.67753	0.00710724	3.6705	0.837843	1.78475	92
A34	0.199915	0.328146	0.639246	0.626562		3.31718	3.82847	0.00739893	3.79082	0.87223	1.84711	23
A35	0.182707	0.00422742	0.712316	0.628645		2.90719	3.38157	0.00653526	3.44423	0.770415	1.6659	128
A36	0.273847	0.119348	0.70978	0.623839		3.25256	3.75793	0.00726262	3.73575	0.85616	1.81838	41
A37	0.195029	0.092697	0.713742	0.637776		3.18938	3.68448	0.00712067	3.66106	0.839427	1.78224	97
A38	0.222647	0.113957	0.852116	0.645947		3.27472	3.81519	0.00737327	3.90802	0.869205	1.88745	9
A39	0.204164	0.126455	0.709938	0.623839		3.22142	3.71662	0.00718278	3.67522	0.846749	1.79141	84
A40	0.203527	0.108626	0.716912	0.63265		3.21067	3.70834	0.00716678	3.68207	0.844862	1.79282	81
A41	0.174209	0.0526896	0.674433	0.574335		3.06675	3.5151	0.00679332	3.39175	0.800837	1.66404	131
A42	0.198853	0.0467467	0.720399	0.633146		3.11962	3.60749	0.00697187	3.59767	0.821885	1.7497	119
A43	0.207138	0.0873667	0.735616	0.639218		3.19806	3.70024	0.00715112	3.69762	0.843016	1.79736	74
A44	0.20204	0.119593	0.716437	0.633931		3.22133	3.72098	0.0071912	3.69582	0.847741	1.79936	71
A45	0.170597	0.180431	0.59217	0.596764		3.18642	3.64451	0.00704341	3.48809	0.830318	1.71505	125
A46	0.202889	0.149369	0.706293	0.630247		3.24273	3.74331	0.00723436	3.70932	0.852829	1.80704	58
A47	0.241768	0.0180125	0.807735	0.607017		3.06859	3.56896	0.00689741	3.63384	0.813108	1.75776	115
A48	0.175483	0.0751133	0.727215	0.526113		3.09233	3.53681	0.00683528	3.38474	0.805783	1.66427	130
A49	0.200552	0.335743	0.544777	0.611182		3.27761	3.76051	0.00726761	3.64224	0.856748	1.78514	90
A50	0.200765	0.258976	0.658583	0.623358		3.29087	3.79437	0.00733303	3.74342	0.864462	1.82577	35
A51	0.212662	0.163767	0.713267	0.633931		3.26403	3.77185	0.00728951	3.75199	0.859331	1.82598	34
A52	0.314213	0.111996	0.776034	0.703941		3.32736	3.88868	0.0075153	4.02726	0.885948	1.93955	5
A53	0.202252	0.108994	0.713742	0.630567		3.20811	3.70396	0.00715831	3.67255	0.843863	1.78884	86
A54	0.220948	0.159478	0.719924	0.638417		3.27026	3.78229	0.00730968	3.77416	0.861709	1.83526	30
A55	0.216274	0.131602	0.718339	0.637937		3.24389	3.75001	0.0072473	3.73547	0.854355	1.81728	45
A56	0.200977	0.348425	0.643208	0.612304		3.31937	3.829	0.00739996	3.78408	0.872351	1.84476	26
A57	0.200977	0.0874893	0.729751	0.64034		3.19321	3.69345	0.007138	3.68654	0.84147	1.79252	82
A58	0.217761	0.171976	0.724204	0.641301		3.28053	3.79636	0.00733688	3.7962	0.864915	1.84496	25
A59	0.208838	0.115733	0.711048	0.631849		3.21886	3.71678	0.00718309	3.68673	0.846785	1.79556	78
A60	0.218398	0.107769	0.71818	0.647068		3.22708	3.73352	0.00721544	3.72981	0.850599	1.81315	51
A61	0.144891	0.0790957	0.700745	0.512656		3.05796	3.48585	0.00673678	3.29306	0.794171	1.62486	135
A62	0.184194	0.135706	0.589475	0.355655		3.00107	3.35008	0.0064744	2.90284	0.76324	1.46716	138
A63	0.205864	0.128599	0.723411	0.623198		3.22831	3.72717	0.00720315	3.69511	0.84915	1.79989	70
A64	0.132781	0.177123	0.670946	0.615988		3.19239	3.67129	0.00709517	3.58721	0.836421	1.75406	117
A65	0.225409	0.151084	0.708036	0.632009		3.25899	3.76472	0.00727572	3.74011	0.857706	1.82081	39
A66	0.219248	0.124249	0.72563	0.641141		3.24298	3.75154	0.00725026	3.74642	0.854703	1.8214	37
A67	0.237519	0.131173	0.731495	0.645146		3.2636	3.77943	0.00730416	3.78894	0.861058	1.8402	28
A68	0.193542	0.0988237	0.710255	0.620955		3.18505	3.67285	0.00709818	3.62532	0.836776	1.76794	112
A69	0.200977	0.098211	0.724521	0.64034		3.20438	3.70509	0.0071605	3.69349	0.844122	1.7965	75
A70	0.215849	0.105379	0.72135	0.636014		3.21793	3.71961	0.00718856	3.70378	0.84743	1.80204	66
A71	0.263862	0	0.832779	0.6719		2.604	3.13898	0.00606642	3.59561	0.715145	1.6888	127
A72	0.203102	0.11267	0.711206	0.636174		3.21473	3.71311	0.00717598	3.68708	0.845947	1.79522	79
A73	0.203102	0.118674	0.737359	0.642262		3.23223	3.7406	0.00722912	3.74092	0.852212	1.81803	43
A74	0.184406	0.0519544	0.70661	0.614707		3.10606	3.58114	0.00692095	3.53255	0.815883	1.72299	123
A75	0.186106	0.109668	0.705342	0.620955		3.19036	3.67751	0.0071072	3.62459	0.837838	1.76827	111
A76	0.123646	0.0879794	0.677128	0.534604		3.05685	3.48634	0.00673774	3.30003	0.794285	1.62743	134
A77	0.226259	0.114937	0.716437	0.643384		3.23636	3.74326	0.00723425	3.73586	0.852817	1.81656	47
A78	0.313788	0.123085	0.752893	0.642422		3.29803	3.82906	0.00740008	3.8742	0.872366	1.8771	11
A79	0.224134	0.106727	0.809954	0.649311		3.25808	3.78873	0.00732213	3.85534	0.863176	1.86519	15
A80	0.201827	0.092942	0.707402	0.628164		3.18661	3.67719	0.00710657	3.63889	0.837765	1.77336	107
A81	0.724665	0.11316	0.848629	0.713073		3.47511	4.12533	0.00797265	4.50282	0.939864	2.14002	2
A82	0.200765	0.235817	0.729276	0.666453		3.32526	3.86076	0.00746134	3.90657	0.879586	1.89274	8
A83	0.153389	0.104583	0.72246	0.381448		3.01312	3.39564	0.00656245	3.06344	0.77362	1.53082	137
A84	0.208625	0.230364	0.696782	0.631208		3.29747	3.8103	0.00736382	3.78953	0.868091	1.84434	27
A85	0.200552	0.151513	0.710255	0.633771		3.2462	3.74924	0.00724581	3.72217	0.854179	1.8124	52
A86	0.182919	0.090859	0.701696	0.619513		3.16516	3.64721	0.00704863	3.59014	0.830934	1.75205	118
A87	0.445932	0.0805048	0.826755	0.699455		3.35168	3.93986	0.00761421	4.16227	0.897609	1.99443	3
A88	0.20119	0.0913491	0.715486	0.641301		3.19416	3.69199	0.00713517	3.67573	0.841136	1.78846	88
A89	0.20034	0.156966	0.70661	0.630727		3.24747	3.74916	0.00724567	3.71649	0.854162	1.81036	54
A90	0.203527	0.156966	0.714376	0.636495		3.25512	3.76171	0.00726992	3.74246	0.857021	1.82127	38
A91	0.205651	0.156966	0.719448	0.639699		3.2598	3.76935	0.00728469	3.7582	0.858762	1.82789	33
A92	0.268749	0.0799534	0.726106	0.643864		3.2216	3.7323	0.00721307	3.74717	0.850319	1.81922	40
A93	0.198215	0.0574684	0.699001	0.634732		3.1341	3.61906	0.00699423	3.59034	0.824521	1.74855	120
A94	0.270448	0.1025	0.743382	0.648831		3.25791	3.77892	0.00730317	3.81056	0.860941	1.84789	22
A95	0.203739	0.163031	0.699001	0.620795		3.24618	3.7433	0.00723433	3.69471	0.852825	1.8018	67
A96	0.24283	0.0852837	0.734665	0.641461		3.2167	3.72509	0.00719915	3.73442	0.848679	1.81373	49
A97	0.199065	1	0	0.626882		2.58695	3.05138	0.00589712	3.26105	0.695188	1.55805	136
A98	0.207351	0.0823429	0.543509	0.571612		3.08684	3.51222	0.00678775	3.29376	0.80018	1.62845	133
A99	1	0.025242	1	1		3.54843	4.38929	0.00848278	5.41849	1	2.50053	1
A100	0.277247	0.0963117	0.745602	0.667254		3.26492	3.79447	0.00733323	3.85317	0.864485	1.86515	16
A101	0.209475	0.114324	0.737042	0.631208		3.22561	3.72949	0.00720765	3.71729	0.849681	1.80814	56
A102	0.216699	0.183617	0.758599	0.650753		3.30373	3.83376	0.00740917	3.872	0.873437	1.87691	12
A103	0.200765	0.126516	0.711048	0.619032		3.21702	3.70988	0.00716975	3.66251	0.845213	1.78599	89
A104	0.194391	0.0876118	0.706768	0.625601		3.17376	3.661	0.00707528	3.61791	0.834076	1.76377	113
A105	0.199065	0.128232	0.710731	0.6405		3.2294	3.73139	0.00721133	3.71014	0.850114	1.80582	60
A106	0.216486	0.103112	0.710889	0.619994		3.2036	3.69559	0.00714212	3.65268	0.841956	1.78065	99
A107	0.20119	0.110955	0.709621	0.636975		3.21173	3.70947	0.00716896	3.68284	0.845119	1.79323	80
A108	0.197153	0.0939223	0.705659	0.627523		3.18392	3.6732	0.00709885	3.63169	0.836855	1.77027	110
A109	0.18993	0.249173	0.585037	0.622076		3.25237	3.73394	0.00721625	3.62523	0.850694	1.77566	103
A110	0.199278	0.0781154	0.711365	0.634572		3.17086	3.66232	0.00707784	3.63624	0.834378	1.77052	108
A111	0.213087	0.0912878	0.726264	0.629606		3.19823	3.69561	0.00714217	3.67543	0.841961	1.78881	87
A112	0.244529	0.167627	0.711682	0.638738		3.28694	3.80227	0.0073483	3.7966	0.866261	1.84585	24
A113	0	0.135523	0.618323	0.475168		2.33747	2.71467	0.00524639	2.74967	0.618476	1.33187	139
A114	0.24028	0.138402	0.789666	0.652675		3.29307	3.828	0.00739802	3.89017	0.872123	1.88268	10
A115	0.203952	0.200711	0.728483	0.636815		3.29025	3.80764	0.00735869	3.8076	0.867486	1.85049	20
A116	0.21075	0.139199	0.717388	0.634092		3.24479	3.74936	0.00724605	3.7287	0.854207	1.81476	48
A117	0.203739	0.156844	0.715327	0.626081		3.24966	3.75203	0.0072512	3.72057	0.854815	1.81219	53
A118	0.163799	0.37667	0.666667	0.629125		3.32225	3.84338	0.00742775	3.83863	0.875627	1.86617	14
A119	0.199915	0.0805048	0.71612	0.634572		3.17602	3.66914	0.00709101	3.64614	0.83593	1.77494	104
A120	0.297854	0.0822816	0.711048	0.503364		3.15073	3.60265	0.00696252	3.44423	0.820783	1.69399	126
A121	0.215424	0.203713	0.757014	0.636975		3.30788	3.83469	0.00741095	3.85884	0.873647	1.8723	13
A122	0.197791	0.154148	0.713267	0.637296		3.24944	3.75471	0.00725638	3.73389	0.855425	1.8173	44
A123	0.404716	0.1112	0.785861	0.678148		3.35071	3.91804	0.00757203	4.06508	0.892636	1.95685	4
A124	0.198428	0.148266	0.705976	0.636495		3.24242	3.7447	0.00723704	3.71704	0.853145	1.80999	55
A125	0.200977	0.102132	0.707878	0.622397		3.19353	3.68311	0.00711801	3.63724	0.839114	1.77352	106
A126	0.198428	0.143916	0.712157	0.628484		3.23637	3.73602	0.00722027	3.70225	0.851168	1.80358	63
A127	0.203102	0.119103	0.718022	0.631368		3.22059	3.71962	0.00718857	3.69264	0.847432	1.79804	73
A128	0.212874	0.116101	0.719924	0.643864		3.23111	3.73707	0.00722229	3.72927	0.851407	1.81341	50
A129	0.205651	0.124617	0.715803	0.634252		3.2283	3.72935	0.00720737	3.70526	0.849648	1.80381	62
A130	0.22116	0.191092	0.734823	0.637776		3.29688	3.81747	0.00737768	3.8253	0.869725	1.85808	17
A131	0.198215	0.107707	0.709938	0.631368		3.20347	3.69786	0.00714653	3.6638	0.842475	1.78493	91
A132	0.200552	0.0550178	0.675384	0.615988		3.11294	3.58406	0.0069266	3.51711	0.816548	1.71782	124
A133	0.198428	0.125536	0.715169	0.636014		3.22544	3.72605	0.00720101	3.70205	0.848898	1.80224	65
A134	0.200977	0.107769	0.709304	0.627523		3.20292	3.69597	0.00714287	3.65734	0.842044	1.78237	95
A135	0.214786	0.0787281	0.714376	0.633291		3.18141	3.67569	0.00710366	3.65383	0.837422	1.77853	101
A136	0.197366	0.0772577	0.716278	0.64034		3.17322	3.6679	0.00708861	3.65219	0.835648	1.77695	102
A137	0.207988	0.135951	0.711365	0.63281		3.23772	3.73928	0.00722658	3.71173	0.851912	1.80739	57
A138	0.201402	0.115243	0.707561	0.63297		3.21332	3.70957	0.00716916	3.67662	0.845143	1.79102	85
A139	0.213937	0.147041	0.730861	0.637296		3.25919	3.77024	0.0072864	3.76489	0.858964	1.8304	32
A140	0.198003	0.0703345	0.713584	0.630888		3.15751	3.64645	0.00704717	3.61886	0.830762	1.76226	114
					Min Pi	2.33747	517.435
					Max Pi	3.54843

[truncated: 3 more sheets: 21_03, 21_06, FINAL RESULTS]
